# Supplementary material for: Motif-Based Text Mining of Microbial Metagenome Redundancy Profiling Data for Disease Classification
Source: Hindawi journal article supplement (doi:10.1155/2016/6598307), 2016-01-01
Supplement: f1 [file 6598307.f1.zip]

**Figure S1** Learning curves of motif finding step of PMF algorithm for dental plaques samples with SVM (a) and saliva samples with NNA (b)

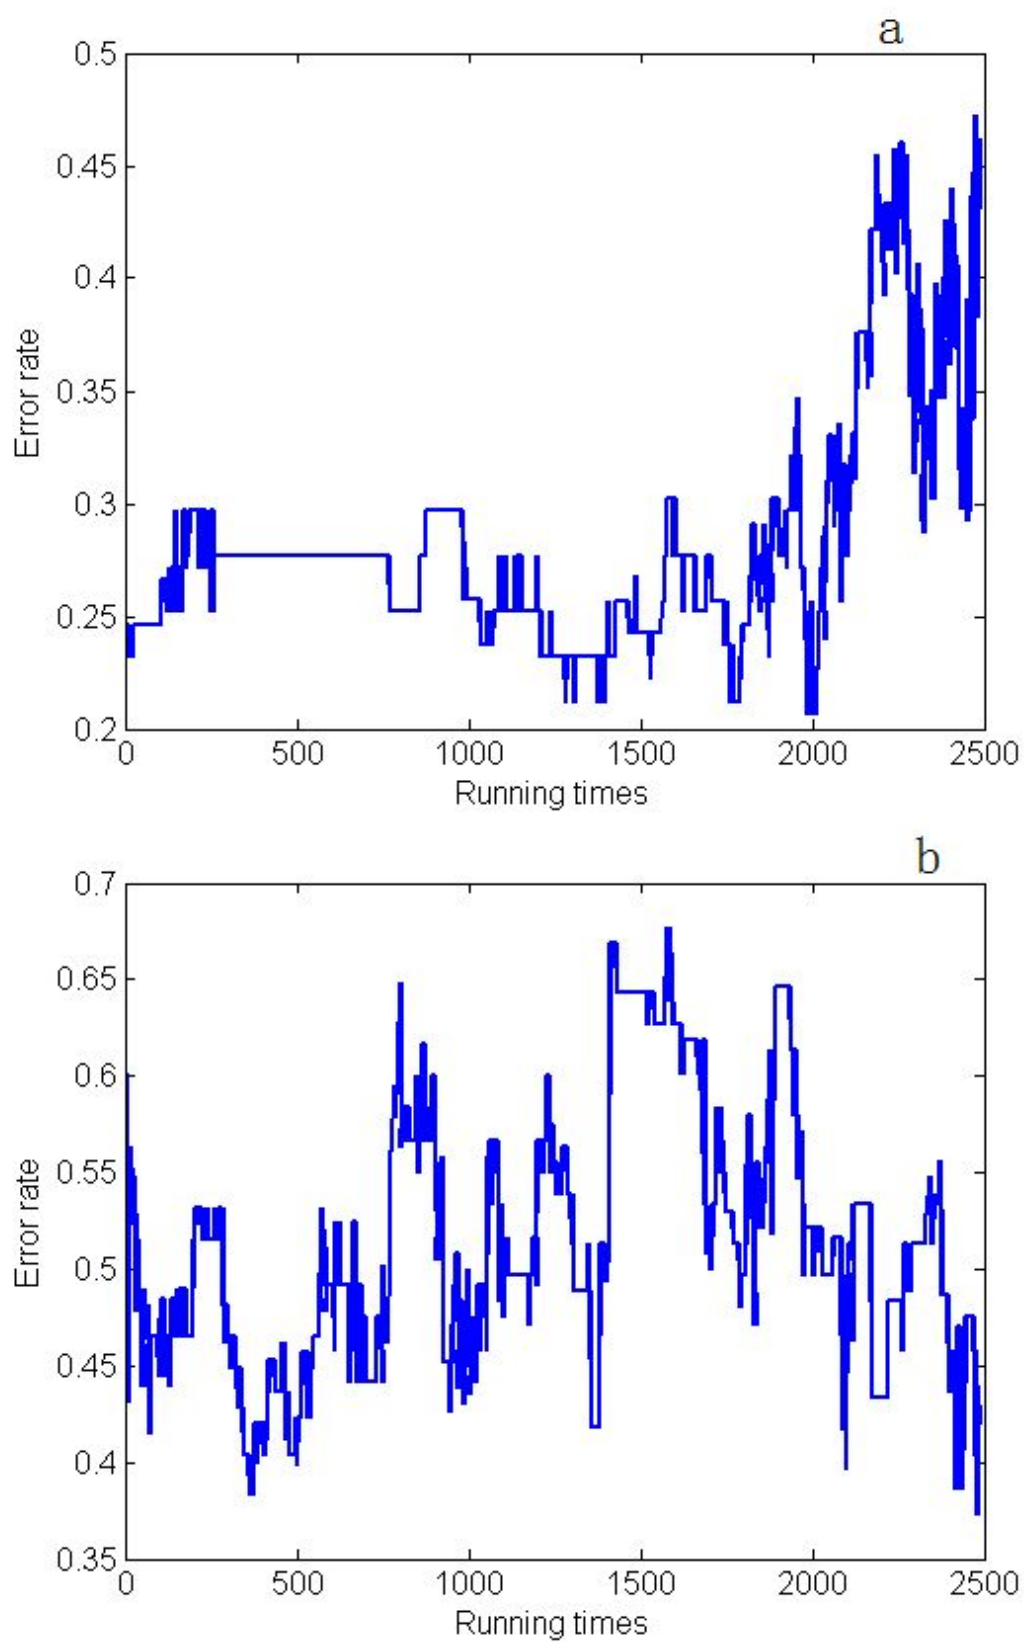

**Table S1:** Microbiota signatures ('KCTCWT') in 3-class problem in pneumonia samples

| Name            | Id [2]   | Relate to pneumonia |
|-----------------|----------|---------------------|
| Actinomyces     | GU737566 | *                   |
| Pseudonocardia  | GU737576 | [21]                |
| Mycobacterium   | GU737577 | *                   |
| Parvimonas      | GU737581 | *                   |
| Eubacterium     | GU737582 | [22]                |
| Acinetobacter   | GU737623 | *                   |
| Aggregatibacter | HQ914699 | *                   |
| Atopobium       | HQ914700 | *                   |
| Olsenella       | HQ914714 | [23]                |
| Amaricoccus     | HQ914728 |                     |
| Anoxybacillus   | HQ914730 | [24]                |
| Brevibacillus   | HQ914731 |                     |
| Enhydrobacter   | HQ914734 | [25]                |
| Ferrimonas      | HQ914736 |                     |
| Serratia        | HQ914745 | [26]                |
| Thermus         | HQ914747 | [27]                |
| Peptococcus     | HQ914755 | [28]                |
| Aeromonas       | HQ914760 | [29]                |
| Brevundimona    | HQ914762 | [30]                |

\* top 20 genera suspiciously contributing to pneumonia [2]

**Table S2:** Microbiota signatures ('WTCGTC' ) in 2-class problem in pneumonia samples

| Name             | Id [2]   | Relate to pneumonia |
|------------------|----------|---------------------|
| Aggregatibacter  | HQ914699 | *                   |
| Atopobium        | HQ914700 | *                   |
| Olsenella        | HQ914714 | *                   |
| Brevibacillus    | HQ914731 |                     |
| Chryseobacterium | HQ914732 | [30]                |
| Brevundimonas    | HQ914762 | [29]                |

\* top 20 genera suspiciously contributing to pneumonia [2]

**Table S3:** Classification results of dental decay data from decay plaques samples

| Method                   | Error rate       |              | Dimension |
|--------------------------|------------------|--------------|-----------|
|                          | On training data | On test data |           |
| SVM/FMS                  | 0.3385           | 0.4444       | 13        |
| SVM/PMF                  | 0.2876           | 0.2308       | 402       |
| SVM/KruskalWallis        | 0.2319           | 0.3654       | 2705      |
| SVM/InformationGain      | 0.2121           | 0.5192       | 132       |
| SVM/Chi-square statistic | 0.2462           | 0.3654       | 2997      |

**Table S4:** Classification results of dental decay data from saliva samples

| Method | Error rate       |              | Dimension |
|--------|------------------|--------------|-----------|
|        | On training data | On test data |           |

|                             |        |         |      |
|-----------------------------|--------|---------|------|
|                             | data   |         |      |
| SVM/FMS                     | 0.2583 | 0.4118  | 46   |
| NNA/PMF                     | 0.42   | 0.1169  | 40   |
| NNA/KruskalWallis           | 0.3617 | 0. 3766 | 97   |
| SVM/InformationGain         | 0.38   | 0.4221  | 2705 |
| SVM/Chi-square<br>statistic | 0.2567 | 0.3961  | 122  |
