# Supplementary material for: Motif-Based Text Mining of Microbial Metagenome Redundancy Profiling Data for Disease Classification
Source: Biomed Res Int. 2016 Feb 14;2016:6598307. doi: 10.1155/2016/6598307 (PMC4769744; doi:10.1155/2016/6598307)
Supplement: Supplementary file 1 — File S1 and S2: k-mer counting results of pneumonia and dental caries data. In File S1, 0 indicates normal sample, 1 indicates CAP and 2 indicates HAP in the last raw. In File S2, 1 indicates dental plaques patient, 2 indicates dental decay control sample, 3 indicates saliva patient, and 4 indicates saliva control sample in the last raw. File S3: Other Supplementary Materials. Figure S1 Learning curves of motif finding step of PMF algorithm for dental plaques samples with SVM (a) and saliva samples with NNA (b). Table S1: Microbiota signatures (“KCTCWT”) in 3-class problem in pneumonia samples. Table S2: Microbiota signatures (“WTCGTC”) in 2-class problem in pneumonia samples. Table S3: Classification results of dental decay data from decay plaques samples. Table S4: Classification results of dental decay data from saliva samples. [file 6598307.f1.zip]

Archive with 4 entries (3 files):
- supplemental file/
- supplemental file/File _S1_pneumonia_data.xls
- supplemental file/File_S2_dental_caries_data.xls
- supplemental file/supplemental material.pdf
