# Supplementary material for: Motif-Based Text Mining of Microbial Metagenome Redundancy Profiling Data for Disease Classification
Source: Biomed Res Int. 2016 Feb 14;2016:6598307. doi: 10.1155/2016/6598307 (PMC4769744; doi:10.1155/2016/6598307)
Supplement: Supplementary file 1 — File S1 and S2: k-mer counting results of pneumonia and dental caries data. In File S1, 0 indicates normal sample, 1 indicates CAP and 2 indicates HAP in the last raw. In File S2, 1 indicates dental plaques patient, 2 indicates dental decay control sample, 3 indicates saliva patient, and 4 indicates saliva control sample in the last raw. File S3: Other Supplementary Materials. Figure S1 Learning curves of motif finding step of PMF algorithm for dental plaques samples with SVM (a) and saliva samples with NNA (b). Table S1: Microbiota signatures (“KCTCWT”) in 3-class problem in pneumonia samples. Table S2: Microbiota signatures (“WTCGTC”) in 2-class problem in pneumonia samples. Table S3: Classification results of dental decay data from decay plaques samples. Table S4: Classification results of dental decay data from saliva samples. [file 6598307.f1.zip › supplemental file/File _S1_pneumonia_data.xls]

## Sheet: Sheet1
TT	0.250078	0.265811	0.256777	0.282996	0.249121	0.252408	0.23479	0.27448	0.261538	0.297797	0.251853	0.254122	0.265643	0.244747	0.246939	0.258026	0.249445	0.242343	0.249769	0.244164	0.24443	0.295761	0.297607	0.246417	0.317279	0.247174	0.2999	0.247525	0.258836	0.265901	0.249126	0.243007	0.23405	0.247304	0.265778	0.249173	0.263188	0.282971	0.263809	0.271086	0.286244	0.273047	0.27172	0.268564	0.251082	0.229779	0.246394	0.233599	0.238724
TA	0.103403	0.107519	0.120448	0.111582	0.121775	0.0999847	0.10132	0.112798	0.102937	0.120625	0.114971	0.107173	0.103762	0.11145	0.124715	0.122369	0.104855	0.108199	0.123884	0.103313	0.113558	0.117768	0.121676	0.113045	0.101798	0.106143	0.12293	0.105719	0.104469	0.123341	0.099283	0.126896	0.105816	0.109889	0.118115	0.136637	0.103798	0.116564	0.107388	0.106198	0.107896	0.109495	0.110786	0.10633	0.0988668	0.0972492	0.113269	0.103876	0.111225
TG	0.285629	0.271858	0.284955	0.271446	0.267864	0.267454	0.26736	0.271446	0.311112	0.272686	0.286968	0.26736	0.252284	0.244685	0.227557	0.236812	0.245446	0.243559	0.237279	0.249708	0.231554	0.233501	0.231511	0.232903	0.248621	0.247051	0.236896	0.263659	0.267903	0.236274	0.234327	0.227528	0.25179	0.26082	0.234636	0.251392	0.247323	0.233884	0.234034	0.255661	0.248931	0.251519	0.242178	0.234027	0.22822	0.284519	0.24236	0.247668	0.244711
TC	0.211151	0.211654	0.203919	0.200876	0.215943	0.242723	0.224097	0.196641	0.19912	0.198459	0.224725	0.219805	0.222136	0.204475	0.211707	0.210259	0.217187	0.228642	0.223396	0.231064	0.223886	0.205855	0.198919	0.222328	0.201972	0.212324	0.210643	0.216995	0.234971	0.223905	0.254107	0.232009	0.246934	0.213853	0.239481	0.200062	0.207149	0.223699	0.254844	0.204141	0.224814	0.231025	0.205177	0.229643	0.25975	0.191255	0.214088	0.203924	0.211523
TN	6.54328e-06	0	1.37423e-05	0	0	0	0	4.76302e-06	0	4.53596e-06	1.86137e-06	0	1.25031e-05	0	0	0	0	0	0	0	1.60006e-05	2.15366e-05	0	8.99281e-06	0	1.09892e-05	0.000226839	0.000189879	6.61416e-05	3.22269e-05	0.000204951	0.000116113	7.00209e-05	3.58558e-05	0.000140969	8.88673e-05	6.23592e-05	8.86766e-05	7.46583e-05	0.00011812	0.000212317	2.02457e-05	0	0	0	0	0	0	0
AT	0.0987349	0.102499	0.113605	0.0933424	0.107635	0.0928845	0.0851379	0.0902368	0.120853	0.123655	0.12951	0.0921784	0.112353	0.102055	0.0907891	0.105452	0.0958902	0.0871681	0.113874	0.0925593	0.0902223	0.113625	0.100439	0.112771	0.106607	0.0922132	0.0967958	0.0946263	0.0994599	0.0912531	0.0997664	0.0785952	0.0810824	0.106022	0.104753	0.10107	0.0966211	0.085113	0.0768025	0.0962772	0.0915447	0.0874557	0.0958805	0.0962248	0.0702805	0.0848923	0.0927944	0.0855542	0.0864103
AG	0.242943	0.250687	0.241355	0.255546	0.237082	0.265286	0.246309	0.254789	0.235214	0.229433	0.235805	0.270362	0.233404	0.242372	0.235617	0.242194	0.237916	0.2572	0.251784	0.249657	0.279056	0.231708	0.234646	0.235628	0.237418	0.258701	0.251392	0.262372	0.261641	0.2496	0.255051	0.297186	0.275445	0.262684	0.256944	0.269757	0.254789	0.276964	0.275846	0.247797	0.258315	0.256859	0.254964	0.25832	0.283541	0.280468	0.25571	0.264374	0.262555
AC	0.263234	0.242803	0.261337	0.253469	0.275128	0.259147	0.277703	0.25857	0.239358	0.235726	0.246893	0.247054	0.224076	0.225505	0.271278	0.238731	0.242684	0.257237	0.228983	0.252749	0.223041	0.216082	0.238264	0.220154	0.222759	0.228294	0.230344	0.256472	0.251271	0.256912	0.250352	0.258897	0.254505	0.237635	0.243832	0.233969	0.232446	0.243551	0.256136	0.249253	0.247919	0.251106	0.222271	0.225571	0.26163	0.220017	0.241581	0.223896	0.243288
AN	6.54328e-06	0	7.58653e-06	0	0	0	0	2.13966e-05	0	1.40812e-05	5.42979e-06	4.94778e-06	1.25031e-05	0	0	0	0	0	0	0	0	0	0	8.99281e-06	1.63989e-05	2.79608e-05	9.2093e-05	0.00020072	0.000124567	0	0.000259835	0.000146914	6.71481e-05	0.000103769	0.000138273	5.43678e-05	7.43339e-05	0.000145158	0.000119246	0.000138755	0.000212558	4.52779e-05	0	0	0	0	0	0	0
GG	0.273357	0.280292	0.255821	0.272704	0.248391	0.2522	0.239732	0.27802	0.258219	0.259965	0.247248	0.264498	0.260733	0.275027	0.254481	0.26446	0.286613	0.254736	0.254348	0.25055	0.247166	0.270497	0.264955	0.249476	0.273764	0.322127	0.263485	0.262119	0.248614	0.264291	0.254022	0.253259	0.260953	0.275941	0.25012	0.270005	0.300555	0.26445	0.255329	0.283644	0.262539	0.265043	0.309993	0.310124	0.256632	0.291812	0.288215	0.286127	0.290904
GC	0.144431	0.14558	0.141212	0.142279	0.137174	0.136829	0.159812	0.144354	0.157926	0.142864	0.138892	0.151516	0.167803	0.184222	0.1586	0.163416	0.16091	0.159416	0.162622	0.162005	0.184477	0.163518	0.158314	0.185188	0.160063	0.154256	0.155009	0.157845	0.142396	0.14527	0.147676	0.144814	0.150828	0.160544	0.140227	0.165445	0.162483	0.142361	0.137219	0.15495	0.139634	0.143545	0.16096	0.144879	0.142574	0.198431	0.163392	0.196545	0.168436
GN	0	3.81782e-05	1.29034e-05	0	0	5.35378e-06	1.33998e-05	2.43505e-05	0	1.10288e-05	1.88474e-05	4.94778e-06	2.01873e-05	0	0	0	1.79379e-05	0	0	0	1.50006e-05	2.1228e-05	0	0	1.28878e-05	7.45343e-05	0.000252722	0.000122235	0.000143974	6.70852e-05	0.000104959	0.000123809	9.47439e-05	0.000136782	0.000140398	7.24004e-05	2.32944e-05	0.000128351	0.000168492	0.000118379	0.00019228	6.83138e-05	0	0	0	0	0	0	0
CG	0.126973	0.121197	0.120499	0.115749	0.139848	0.131062	0.163685	0.118576	0.113724	0.11874	0.123046	0.125912	0.157761	0.165462	0.178315	0.158265	0.159018	0.161499	0.15406	0.164231	0.162547	0.15161	0.153652	0.182052	0.129613	0.131487	0.131767	0.131971	0.130009	0.143051	0.155577	0.137273	0.138281	0.124901	0.145508	0.122193	0.131424	0.129937	0.138103	0.130322	0.131326	0.130661	0.126071	0.126317	0.147423	0.121577	0.142197	0.154437	0.142224
CN	5.2735e-05	6.36711e-05	2.02429e-05	1.23927e-05	3.84504e-05	1.60613e-05	4.01994e-05	3.87341e-05	0	1.15627e-05	6.49695e-05	8.96015e-06	0	0	0	1.79203e-05	1.79379e-05	0	0	0	3.10012e-05	3.26813e-05	8.31172e-06	1.97644e-05	7.65714e-05	0.000116296	0.000228431	0.000183372	7.90722e-05	0.000102819	0.000111059	0.000138428	8.22654e-05	0.000128678	0.00017684	8.19235e-05	6.45149e-05	0.000145021	0.000124864	0.000296091	0.000201996	0.000109619	0	0	0	0	0	0	0
NN	0	0	1.84672e-05	0	0	0	0	0	0	9.26644e-06	0	0	0	0	0	0	0	0	0	0	0	0	8.31172e-06	0	0	0	3.80408e-05	0	1.7484e-05	0	3.21673e-05	9.63633e-06	0	0	8.89624e-06	0	0	0	0	0	1.83442e-05	0	0	0	0	0	0	0	0
TTT	0.0502433	0.0632716	0.0593216	0.0715731	0.0593907	0.0482651	0.0492718	0.0685549	0.0626222	0.0710806	0.0558489	0.0518463	0.0582576	0.0502558	0.0586634	0.0615703	0.0628891	0.0508857	0.0601723	0.05629	0.0517372	0.0681564	0.0698934	0.0526289	0.104166	0.0548468	0.0909726	0.0509679	0.0580489	0.0613938	0.0546715	0.0497924	0.0467026	0.0550974	0.0608696	0.0562746	0.055601	0.0673663	0.0518625	0.0586087	0.0707692	0.0544889	0.0659884	0.0743111	0.0546935	0.0408644	0.051788	0.0470974	0.0484806
TTA	0.0523576	0.0546293	0.0671671	0.0760227	0.0549565	0.0535366	0.0539202	0.0753823	0.0572812	0.096846	0.0678581	0.055181	0.0573674	0.0653835	0.056919	0.0541684	0.0539152	0.0595963	0.0572487	0.0536954	0.0639414	0.079374	0.0987855	0.0643794	0.055431	0.0559367	0.0771393	0.0599069	0.0595587	0.0616041	0.0542689	0.0574611	0.0548823	0.0610167	0.0667144	0.0594562	0.0555998	0.0774091	0.0568432	0.0590844	0.0590498	0.0616786	0.0764226	0.0746552	0.06034	0.0579325	0.0592993	0.0549125	0.0582205
TTG	0.0694318	0.0524008	0.0471877	0.0510193	0.0498173	0.0408544	0.0452099	0.0515874	0.0589976	0.0535703	0.0508147	0.0702144	0.0689794	0.0468843	0.0497496	0.0545165	0.051129	0.0510137	0.0523239	0.053576	0.0484498	0.0532229	0.0513407	0.0497599	0.0523522	0.0490078	0.0497865	0.0510732	0.047199	0.0523932	0.045113	0.0461966	0.0481364	0.0526058	0.0484259	0.054062	0.0514391	0.0461607	0.0419513	0.0517836	0.0648432	0.0654039	0.061005	0.0562815	0.0430215	0.0426287	0.0572144	0.0550165	0.0528032
TTC	0.0780456	0.0954555	0.0831004	0.0843761	0.0849419	0.109752	0.0863804	0.0789413	0.0826023	0.0762494	0.077313	0.0768021	0.0810167	0.0822235	0.0816073	0.0877312	0.0815114	0.0808473	0.080024	0.0806025	0.080286	0.0949414	0.0775786	0.0796488	0.0859337	0.0872827	0.0816605	0.0853669	0.0937784	0.0902605	0.0946453	0.089287	0.0841384	0.0782798	0.0894415	0.0792369	0.0819843	0.0916763	0.112956	0.0839725	0.0910054	0.091391	0.0682204	0.0633163	0.093021	0.0883533	0.0780544	0.0765329	0.0792192
TTN	0	0	0	0	0	0	0	4.76302e-06	0	1.50954e-06	1.86137e-06	0	0	0	0	0	0	0	0	0	0	0	0	0	0	5.40286e-06	5.58599e-05	6.9014e-05	3.27935e-05	0	0.000170555	8.22997e-05	2.14777e-05	1.1834e-05	9.10949e-05	2.85616e-05	1.31686e-05	6.18872e-05	1.20788e-05	3.21245e-05	9.4302e-05	8.37412e-06	0	0	0	0	0	0	0
TAT	0.0326116	0.0511543	0.0509465	0.0478458	0.0548897	0.0274973	0.0351229	0.0472413	0.046646	0.0465943	0.0574366	0.0412715	0.0398646	0.0510108	0.0374882	0.0502171	0.0420359	0.0342356	0.0600925	0.0381073	0.0492129	0.0502662	0.0463327	0.0594595	0.0484563	0.0376701	0.0550017	0.0381143	0.0307907	0.0366951	0.0288916	0.0311959	0.0330924	0.0477145	0.0560983	0.0507405	0.0407917	0.0432312	0.0305855	0.0391383	0.042621	0.0371081	0.0321027	0.0287939	0.0178863	0.0381355	0.0394431	0.0306531	0.0360019
TAG	0.0372842	0.0357829	0.0331815	0.0315875	0.0345489	0.0457587	0.0316107	0.0335295	0.03135	0.0283899	0.0336222	0.0358779	0.0318689	0.034848	0.0353265	0.052733	0.043289	0.0391818	0.052883	0.032983	0.0412823	0.0362041	0.0289477	0.0304472	0.029618	0.0471015	0.0379279	0.0326557	0.0372127	0.0356162	0.0326623	0.0777473	0.0364291	0.0389287	0.0374024	0.0691844	0.0306606	0.0377453	0.0483644	0.041409	0.0380328	0.0394727	0.0282084	0.0243678	0.0304785	0.0296099	0.0403243	0.0363003	0.0386289
TAC	0.0844589	0.073444	0.0895648	0.0677075	0.0990559	0.0731594	0.0819558	0.069391	0.0705841	0.0693879	0.0710036	0.081958	0.078413	0.071638	0.11949	0.0875794	0.0704386	0.0832987	0.0774424	0.0818413	0.0726637	0.0696809	0.069248	0.0717856	0.0699692	0.0713384	0.0756281	0.0803667	0.0811678	0.0948597	0.082626	0.0871122	0.0870616	0.0718376	0.075918	0.0750036	0.0802859	0.0746065	0.0787644	0.0724384	0.0758001	0.080558	0.0739069	0.073561	0.0783656	0.0582514	0.0768363	0.0745681	0.0786855
TAN	0	0	0	0	0	0	0	1.66335e-05	0	6.46572e-06	0	0	0	0	0	0	0	0	0	0	0	0	0	0	6.82012e-06	6.46456e-06	0	0.000129311	3.33481e-05	0	9.61173e-06	2.65312e-05	3.17591e-05	3.70872e-05	1.60745e-05	1.05938e-05	0	1.42786e-05	3.59982e-05	5.4431e-05	9.40855e-05	0	0	0	0	0	0	0	0
TGT	0.0591635	0.058357	0.0816489	0.0629355	0.0607993	0.0622937	0.0628791	0.0601528	0.062634	0.0596054	0.0601504	0.0543178	0.0491253	0.0408509	0.0410684	0.0377011	0.0404981	0.0516039	0.0426226	0.0515841	0.0386979	0.0398691	0.0435398	0.0386823	0.0398656	0.0402858	0.0397533	0.0498649	0.0527924	0.0419978	0.0418972	0.0422574	0.040585	0.0384508	0.0458019	0.0373933	0.0372407	0.0447034	0.045526	0.0408226	0.0457134	0.04362	0.0446851	0.0412642	0.0469419	0.0546063	0.0365167	0.0407703	0.0411533
TGA	0.0545394	0.0558657	0.0521072	0.05393	0.0531949	0.0537355	0.0541764	0.0547782	0.0535731	0.0528244	0.073461	0.0560718	0.0651328	0.0545312	0.0518599	0.0559241	0.053216	0.0617748	0.0541312	0.0622607	0.0543303	0.0527818	0.0535947	0.0549835	0.0534079	0.0559223	0.0561823	0.0644172	0.0659709	0.0566536	0.0554029	0.056277	0.0783696	0.0649961	0.0558078	0.0527435	0.0542164	0.0565117	0.0558707	0.054069	0.0560864	0.0573908	0.0407217	0.043634	0.0554754	0.0515505	0.05614	0.0485579	0.0516845
TGG	0.073349	0.0556249	0.0525676	0.0565601	0.0560276	0.057372	0.0517513	0.0566184	0.0559681	0.0588685	0.0561374	0.0548697	0.0545381	0.0697802	0.0548581	0.0595325	0.0675271	0.0531561	0.0572777	0.054868	0.0543055	0.0577715	0.0572536	0.0554234	0.0602687	0.0636217	0.0546405	0.0577126	0.0501355	0.0545362	0.0535831	0.0501789	0.0519399	0.062608	0.0545732	0.061357	0.061629	0.0529688	0.0581231	0.0697742	0.0699085	0.069183	0.0689887	0.0690003	0.0491482	0.0538096	0.0619071	0.04495	0.0537715
TGC	0.0793635	0.0826531	0.0790453	0.0785479	0.0788202	0.0748518	0.0790681	0.0805615	0.119519	0.0817546	0.0778729	0.0825628	0.0833128	0.079447	0.0796235	0.0836349	0.0841798	0.0769643	0.0832479	0.0809643	0.0841678	0.0830033	0.0770706	0.083769	0.0950221	0.0869271	0.0862327	0.0913743	0.0809919	0.0830543	0.0832635	0.0786816	0.0807339	0.0946167	0.0783564	0.0996419	0.0941122	0.0794578	0.0743826	0.0907893	0.0769477	0.0811536	0.0877827	0.0800631	0.0765948	0.124553	0.0877957	0.11339	0.0980968
TGN	0	0	1.29034e-05	0	0	0	1.33998e-05	0	0	6.24003e-06	0	0	2.01873e-05	0	0	0	0	0	0	0	0	0	0	0	0	2.77405e-05	4.84326e-05	3.04081e-05	1.79211e-05	0	0	0	3.77617e-05	2.56413e-05	7.33116e-06	3.18302e-05	2.32944e-05	3.26815e-05	4.13148e-05	1.90375e-05	0	1.06219e-05	0	0	0	0	0	0	0
TCT	0.0506991	0.0412652	0.0551516	0.0509782	0.0547929	0.0690754	0.061129	0.045648	0.050665	0.0437414	0.0498263	0.0699125	0.0446947	0.0552509	0.0510262	0.0599341	0.0479907	0.0690001	0.0561769	0.0480311	0.0703093	0.0420439	0.0471327	0.048026	0.0447279	0.0557173	0.053778	0.0507028	0.0685276	0.0583263	0.0637016	0.0723844	0.0668319	0.048362	0.0625727	0.0447116	0.0428187	0.0650091	0.0727591	0.0487524	0.0648978	0.0652968	0.043465	0.0457469	0.0819987	0.0420614	0.0497557	0.0617665	0.0605537
TCG	0.033212	0.0285333	0.029235	0.0278705	0.0396064	0.0355482	0.0426321	0.0288327	0.0256922	0.031371	0.0318666	0.0288479	0.0451142	0.0323968	0.0391548	0.0253394	0.0276377	0.0313275	0.0450384	0.0518553	0.033385	0.0434377	0.0282442	0.0527713	0.0330518	0.0332487	0.0318859	0.0342597	0.0315315	0.0376356	0.0663948	0.0368806	0.0373311	0.0276506	0.0489173	0.0257701	0.0310311	0.0328651	0.0389286	0.0303163	0.0329897	0.0313642	0.0368236	0.0441371	0.0463532	0.0315879	0.0357487	0.0333238	0.0288131
TCC	0.072693	0.0859763	0.0674119	0.0680907	0.0683297	0.0843637	0.0661327	0.0673817	0.0691895	0.0705195	0.0695441	0.0649583	0.0671549	0.0622966	0.0696666	0.0690612	0.0883248	0.0665398	0.0680496	0.0689169	0.0658612	0.0675803	0.0699478	0.0665387	0.0707226	0.0673965	0.0686803	0.0674566	0.0688695	0.0712536	0.0685164	0.0664098	0.0643058	0.0727825	0.072056	0.0767924	0.0789843	0.069204	0.0872235	0.070885	0.0707287	0.0769108	0.084095	0.0960622	0.0759051	0.0660549	0.0724435	0.0602753	0.0704715
TCN	0	0	1.34953e-05	6.19636e-06	1.92252e-05	0	2.67996e-05	0	0	0	2.38841e-05	0	0	0	0	0	1.79379e-05	0	0	0	0	1.09826e-05	0	0	4.62024e-05	2.67479e-05	9.51233e-05	5.57315e-05	2.03649e-05	3.57334e-05	2.70693e-05	2.40341e-05	0	4.46531e-05	4.52697e-05	1.14943e-05	2.09202e-05	0.00010927	4.27051e-05	9.01094e-05	5.70481e-05	2.93066e-05	0	0	0	0	0	0	0
TNT	6.54328e-06	0	7.58653e-06	0	0	0	0	4.76302e-06	0	1.50954e-06	1.86137e-06	0	1.25031e-05	0	0	0	0	0	0	0	0	0	0	8.99281e-06	0	5.58636e-06	6.04059e-05	0.000170136	3.33481e-05	0	0.000169859	6.79286e-05	3.5389e-05	3.58558e-05	7.16837e-05	1.44582e-05	5.08617e-05	7.76973e-05	6.25795e-05	2.22104e-05	0.000117647	2.02457e-05	0	0	0	0	0	0	0
TNA	0	0	0	0	0	0	0	0	0	0	0	0	0	0	0	0	0	0	0	0	0	1.07683e-05	0	0	0	0	5.27632e-05	0	0	1.61134e-05	1.21846e-05	0	0	0	8.16253e-06	2.29792e-05	0	0	0	1.56779e-05	0	0	0	0	0	0	0	0	0
TNG	0	0	0	0	0	0	0	0	0	0	0	0	0	0	0	0	0	0	0	0	1.60006e-05	0	0	0	0	0	0	0	0	0	0	1.20171e-05	1.06526e-05	0	6.18567e-06	1.05938e-05	0	1.09794e-05	0	4.82775e-05	2.92976e-05	0	0	0	0	0	0	0	0
TNC	0	0	0	0	0	0	0	0	0	0	0	0	0	0	0	0	0	0	0	0	0	0	0	0	0	5.40286e-06	1.78001e-05	1.97426e-05	3.27935e-05	0	0	2.65312e-05	2.39793e-05	0	3.78779e-05	1.78568e-05	1.14975e-05	0	1.20788e-05	1.62763e-05	6.53723e-05	0	0	0	0	0	0	0	0
TNN	0	0	6.15574e-06	0	0	0	0	0	0	3.02641e-06	0	0	0	0	0	0	0	0	0	0	0	0	0	0	0	0	4.31062e-05	0	0	0	1.07224e-05	9.63633e-06	0	0	8.89624e-06	0	0	0	0	0	0	0	0	0	0	0	0	0	0
ATT	0.0744872	0.086818	0.073522	0.0676478	0.0677207	0.0690857	0.0571958	0.0669178	0.0769378	0.113504	0.0765892	0.0633573	0.0855883	0.0694672	0.0692393	0.0831276	0.070515	0.0676867	0.070131	0.0712731	0.0658539	0.108275	0.0871505	0.0788161	0.0889249	0.0654368	0.0636081	0.0651865	0.0581666	0.0687651	0.0580806	0.0555189	0.0550051	0.0733221	0.0713512	0.0727051	0.0677503	0.0597476	0.0522889	0.0682352	0.0773063	0.0609472	0.0840297	0.0871234	0.0536328	0.0543429	0.0659356	0.0660786	0.0647828
ATG	0.0495615	0.0377705	0.0728515	0.0411552	0.0532157	0.0566933	0.0350498	0.0363082	0.0882151	0.0571189	0.0745562	0.0408355	0.0409737	0.0519216	0.0361308	0.0376577	0.0490202	0.0330813	0.0396223	0.0335892	0.0346162	0.0412281	0.0383528	0.0365593	0.0424402	0.0490679	0.0417728	0.0442152	0.0695439	0.0387942	0.0309706	0.0285522	0.03041	0.0597841	0.0332199	0.050769	0.0437146	0.0348568	0.036652	0.0527047	0.031945	0.0357077	0.0318242	0.0308588	0.0201228	0.0419292	0.036222	0.0345272	0.0327717
ATC	0.0406748	0.0292547	0.0298095	0.0299846	0.0393279	0.0324176	0.0428935	0.0299737	0.0297947	0.0300494	0.0503542	0.0388335	0.0580722	0.0316905	0.0387039	0.0398819	0.0301759	0.0392057	0.0578263	0.0420853	0.0307536	0.0274139	0.0289922	0.0506542	0.0333189	0.0321818	0.0330871	0.041362	0.0401168	0.038114	0.0634948	0.0417673	0.0435919	0.0311347	0.0487078	0.0278747	0.0408709	0.0322777	0.0339422	0.0323065	0.0310424	0.0410331	0.0329608	0.0344341	0.038299	0.0248401	0.0334326	0.0285106	0.0283665
ATN	6.54328e-06	0	7.58653e-06	0	0	0	0	0	0	0	0	0	1.25031e-05	0	0	0	0	0	0	0	0	1.07683e-05	0	8.99281e-06	0	5.58636e-06	8.32209e-05	2.21381e-05	3.33481e-05	1.61134e-05	0	9.63633e-06	2.43928e-05	2.40218e-05	8.16253e-06	8.87587e-06	1.75977e-05	1.07753e-05	3.57491e-05	3.83634e-05	6.41919e-05	1.18715e-05	0	0	0	0	0	0	0
AAG	0.0734606	0.0696782	0.0770515	0.0801529	0.0744658	0.080833	0.0798432	0.0937839	0.0786336	0.0720104	0.0710509	0.0916579	0.0767448	0.0761163	0.0719596	0.0709777	0.069675	0.0721728	0.0751206	0.0702501	0.0827316	0.0735435	0.0755134	0.0721104	0.0795048	0.0782413	0.0762897	0.0813161	0.0859298	0.0828773	0.0855913	0.0808895	0.0788293	0.0759215	0.0798563	0.0709754	0.0968695	0.101519	0.0834383	0.0773873	0.0820856	0.0803953	0.0776739	0.0682135	0.087432	0.0865363	0.0754122	0.0705303	0.0725498
AAC	0.0518739	0.0458365	0.0468597	0.0635318	0.0475437	0.0541581	0.0484511	0.0451709	0.0433316	0.0410525	0.0483079	0.0472552	0.0450206	0.0488115	0.047077	0.0423098	0.0463487	0.0515978	0.044345	0.0463507	0.0440743	0.0457513	0.0650049	0.0427946	0.0444779	0.0484679	0.0505189	0.0493389	0.0562601	0.0527061	0.0504279	0.0565701	0.053268	0.0426588	0.0532711	0.0490321	0.0427223	0.0539273	0.0579876	0.0664542	0.0555304	0.0586515	0.0439645	0.0389099	0.0553119	0.0480327	0.0531558	0.0498495	0.0528996
AAN	0	0	7.58653e-06	0	0	0	0	0	0	7.61546e-06	1.86137e-06	0	1.25031e-05	0	0	0	0	0	0	0	0	0	0	0	0	5.58636e-06	5.28175e-05	4.92715e-05	0	0	3.38363e-05	1.74497e-05	1.07814e-05	4.34634e-05	3.86328e-05	8.97989e-06	4.25632e-05	4.37605e-05	3.68589e-05	3.77739e-05	6.02468e-05	1.71487e-05	0	0	0	0	0	0	0
AGT	0.0571156	0.0518906	0.0532268	0.050582	0.0552759	0.0623987	0.0563843	0.0515994	0.0509207	0.0520499	0.0577722	0.0598115	0.0483791	0.0532975	0.0531059	0.0465899	0.0520816	0.055411	0.0610756	0.0716039	0.0547871	0.0500716	0.0523132	0.0541241	0.0500204	0.0538277	0.0553729	0.0727677	0.0619999	0.0547685	0.0597057	0.0730066	0.0707647	0.0676772	0.0610136	0.0560585	0.0500466	0.0618175	0.0671757	0.0547723	0.0626878	0.0617851	0.0560999	0.0650105	0.0716083	0.0537529	0.0555065	0.0413301	0.0514981
AGG	0.0575851	0.0793727	0.0613051	0.0791599	0.0545803	0.0597917	0.0542407	0.0803032	0.0612981	0.0603734	0.055453	0.0617956	0.0640378	0.0582277	0.0597788	0.0600841	0.0631479	0.0598742	0.0592409	0.0542223	0.0559853	0.0672787	0.0648194	0.0558612	0.0599259	0.0685242	0.0594519	0.0587006	0.056952	0.0620978	0.0524785	0.0553052	0.0563062	0.0660224	0.0574467	0.0629193	0.0792751	0.0735564	0.0615289	0.0662097	0.0553385	0.0555563	0.0819119	0.0853287	0.0590984	0.0732874	0.0655759	0.0725333	0.0699808
AGC	0.0775151	0.0781327	0.0716507	0.0748105	0.0724036	0.0739849	0.0745185	0.0772263	0.0723298	0.0732309	0.0727026	0.078795	0.0761883	0.0755578	0.0716791	0.0755263	0.0746621	0.0728283	0.0752661	0.075767	0.0977961	0.0722916	0.0703802	0.0776035	0.0826834	0.0805267	0.0826454	0.0797245	0.0738751	0.0742638	0.0789454	0.0782536	0.0813977	0.0804744	0.0757333	0.105877	0.082532	0.0763932	0.0742092	0.0778387	0.0751232	0.0740958	0.0734647	0.0622335	0.0707815	0.111366	0.0848718	0.0887441	0.0804951
AGN	0	0	0	0	0	5.35378e-06	0	0	0	0	6.97785e-06	0	0	0	0	0	0	0	0	0	0	1.05119e-05	0	0	0	5.30604e-06	3.61433e-05	1.97426e-05	9.3169e-05	3.58284e-05	0	5.30624e-05	1.3369e-05	2.65829e-05	5.14128e-05	1.78568e-05	0	1.45656e-05	3.4983e-05	1.62763e-05	2.97923e-05	3.07877e-05	0	0	0	0	0	0	0
ACG	0.0788203	0.0767281	0.0725508	0.0685739	0.105513	0.0834825	0.107863	0.0719557	0.0708482	0.0705314	0.0764592	0.0769266	0.0718214	0.0758215	0.122833	0.0969153	0.0783276	0.0952728	0.0718335	0.0781588	0.0768814	0.0676192	0.0867437	0.0747292	0.0775032	0.0790627	0.0814874	0.0770039	0.0808895	0.103041	0.0937683	0.0871798	0.0863653	0.0740394	0.081495	0.0808701	0.076331	0.0821146	0.0901649	0.0791018	0.0851072	0.0813047	0.0620276	0.0615591	0.087781	0.0564081	0.0868656	0.0835037	0.0862791
ACC	0.0681348	0.0558268	0.0538961	0.0713777	0.0535214	0.0509724	0.0505761	0.0748542	0.0549555	0.0535296	0.0524935	0.0559935	0.0547505	0.0555354	0.0542716	0.0575065	0.0717763	0.0549293	0.0534508	0.051402	0.0526751	0.0585112	0.0556585	0.0526186	0.0553195	0.055096	0.0536186	0.0567172	0.0555288	0.0570376	0.054873	0.0563991	0.0567319	0.0574135	0.0554807	0.0596122	0.0688182	0.0548753	0.0532135	0.0744481	0.0543163	0.0643354	0.0594585	0.0577322	0.0552985	0.0552446	0.0626868	0.0582917	0.0643573
ACN	0	0	6.74764e-06	0	0	0	0	7.717e-06	0	4.71168e-06	1.04164e-05	0	0	0	0	1.79203e-05	0	0	0	0	0	1.0716e-05	8.31172e-06	0	6.06772e-06	1.30094e-05	1.78891e-05	9.72321e-05	2.21249e-05	0	4.13772e-05	4.18786e-05	2.96726e-05	3.48435e-05	1.33752e-05	8.60993e-06	0	1.02062e-05	2.61421e-05	8.68876e-05	5.23597e-05	3.03365e-05	0	0	0	0	0	0	0
ANT	0	0	0	0	0	0	0	0	0	0	0	0	0	0	0	0	0	0	0	0	0	0	0	0	0	0	0	0	0	0	0	0	0	0	0	0	0	0	0	0	0	0	0	0	0	0	0	0	0
ANG	0	0	0	0	0	0	0	0	0	4.71168e-06	3.56842e-06	0	0	0	0	0	0	0	0	0	0	0	0	0	9.57882e-06	0	0	0	2.03649e-05	0	2.54658e-05	3.02077e-05	1.63036e-05	0	3.65498e-05	1.95737e-05	1.16753e-05	0	1.51542e-05	6.5171e-05	3.7714e-05	8.37412e-06	0	0	0	0	0	0	0
ANC	0	0	0	0	0	0	0	1.66335e-05	0	4.78881e-06	0	4.94778e-06	0	0	0	0	0	0	0	0	0	0	0	0	6.82012e-06	2.23744e-05	3.16871e-05	3.05838e-05	3.49889e-05	0	6.45099e-05	3.91417e-05	1.54555e-05	6.79129e-05	2.1143e-05	2.0336e-05	1.17969e-05	6.74604e-05	4.15119e-05	5.13732e-05	3.88526e-05	1.66581e-05	0	0	0	0	0	0	0
ANN	0	0	0	0	0	0	0	0	0	0	0	0	0	0	0	0	0	0	0	0	0	0	0	0	0	0	0	0	1.7484e-05	0	0	9.63633e-06	0	0	8.89624e-06	0	0	0	0	0	1.83442e-05	0	0	0	0	0	0	0	0
GTG	0.0849624	0.0791019	0.0785866	0.0752381	0.0813204	0.0882784	0.102816	0.0973489	0.076479	0.0771083	0.0796696	0.0774477	0.058107	0.0624766	0.0579907	0.0588553	0.0596949	0.0600355	0.0585122	0.0797273	0.0629709	0.0531598	0.0559589	0.0616206	0.0666368	0.0620403	0.0593233	0.0660882	0.065935	0.0600242	0.0728582	0.0696036	0.0696915	0.061155	0.0656696	0.0590365	0.0643157	0.0665461	0.0721179	0.0648019	0.0669056	0.0667103	0.0548028	0.0568866	0.0782857	0.0874063	0.0626816	0.0567521	0.0632307
GTC	0.0418593	0.0442781	0.046203	0.0467985	0.0470454	0.0434372	0.0442741	0.0464377	0.0488213	0.0480242	0.0477992	0.0402326	0.0424933	0.0425583	0.0467057	0.049926	0.0661469	0.0620882	0.0485774	0.044732	0.0432912	0.0474237	0.0480057	0.0439186	0.0415983	0.0463713	0.0447644	0.044065	0.0477524	0.0491645	0.0442676	0.0454952	0.0442526	0.0618482	0.0488783	0.0507836	0.0449766	0.0483636	0.0471441	0.0452755	0.0496283	0.0451219	0.0494828	0.0561433	0.0495701	0.0263102	0.0488744	0.0427087	0.0484609
GTN	0	0	6.15574e-06	0	0	0	0	0	0	3.02641e-06	0	0	0	0	0	0	0	0	0	0	0	0	0	0	0	0	1.89303e-05	0	0	1.61134e-05	2.36729e-05	1.21601e-05	0	0	1.71668e-05	3.73265e-05	1.14975e-05	1.60141e-05	8.24654e-06	4.76321e-05	0	0	0	0	0	0	0	0	0
GAG	0.0505255	0.0426275	0.0447928	0.0397164	0.0445876	0.0570605	0.0505352	0.0412472	0.0378765	0.0441269	0.049242	0.0639283	0.0405344	0.0479836	0.0446905	0.0327007	0.0393026	0.0464747	0.0369446	0.0636443	0.0695382	0.0360649	0.0443342	0.0480707	0.0410771	0.0464179	0.0510151	0.0460314	0.0532335	0.0460224	0.0514816	0.0553455	0.0567626	0.0423736	0.0523567	0.0420815	0.0392102	0.0512633	0.0606806	0.0424904	0.053035	0.0534042	0.0545128	0.075733	0.0788543	0.0517457	0.0537265	0.0561714	0.0554645
GAN	6.54328e-06	0	0	0	0	0	0	0	0	0	3.56842e-06	0	0	0	0	0	0	0	0	0	0	0	0	8.99281e-06	0	0	2.12965e-05	0	3.58647e-05	0	0.000168184	3.50505e-05	1.37825e-05	0	6.37706e-05	8.84173e-06	1.16753e-05	4.30573e-05	0	2.75122e-05	1.72777e-05	7.88345e-06	0	0	0	0	0	0	0
GGG	0.0562868	0.0619715	0.0587456	0.0556849	0.0540561	0.0473367	0.05118	0.0582528	0.0600053	0.0592372	0.0519271	0.0602372	0.0578671	0.0600456	0.0556715	0.0595995	0.0546525	0.0570047	0.0561335	0.0562014	0.0538017	0.0639681	0.06133	0.0556716	0.0661104	0.100303	0.0602825	0.0563876	0.0497838	0.0569591	0.0558499	0.0545938	0.0603127	0.0607065	0.049733	0.0576878	0.068423	0.0484837	0.0445877	0.057906	0.0473328	0.0501767	0.0744983	0.073289	0.0514329	0.077442	0.0643808	0.0686038	0.068695
GGC	0.0761252	0.0764837	0.0757392	0.077484	0.072334	0.0694127	0.0717689	0.077391	0.0740445	0.0766431	0.0731662	0.0832641	0.0809604	0.0970897	0.0748407	0.0782732	0.0718594	0.0762343	0.0766649	0.073929	0.0747485	0.0803599	0.0780187	0.07462	0.0813448	0.0801145	0.0800232	0.0811442	0.0742039	0.0787399	0.0743728	0.0755278	0.0792415	0.0845244	0.0725111	0.0756773	0.0840579	0.0735351	0.069909	0.0798787	0.0728449	0.0733517	0.0919412	0.0830409	0.0739894	0.0930707	0.0886983	0.0989563	0.0873804
GGN	0	0	0	0	0	0	0	1.66335e-05	0	4.78881e-06	3.32708e-06	4.94778e-06	0	0	0	0	0	0	0	0	0	0	0	0	0	2.29378e-05	8.21206e-05	3.05838e-05	1.80112e-05	1.29149e-05	6.49225e-05	2.92195e-05	1.54555e-05	7.29083e-05	4.91223e-05	0	0	6.68258e-05	2.58167e-05	3.47272e-05	7.94265e-05	7.88345e-06	0	0	0	0	0	0	0
GCG	0.055805	0.0538501	0.0559885	0.053715	0.0507896	0.055393	0.0942682	0.0534895	0.0499359	0.0540882	0.0540109	0.0583972	0.0950924	0.116312	0.0910575	0.089397	0.0910685	0.0928055	0.090066	0.0933498	0.112227	0.0913808	0.0911583	0.134354	0.0610418	0.0609125	0.0609777	0.063332	0.0557032	0.054424	0.058716	0.0570999	0.0602262	0.0614195	0.0537969	0.0496431	0.0642153	0.055302	0.0558861	0.0613135	0.0542755	0.0584356	0.0687321	0.0644206	0.0637647	0.0678666	0.0654121	0.092001	0.0708996
GCN	5.2735e-05	2.5493e-05	0	0	0	1.60613e-05	0	3.10171e-05	0	3.4255e-06	2.72596e-05	8.96015e-06	0	0	0	0	0	0	0	0	1.50006e-05	0	0	9.8822e-06	1.73983e-05	3.03678e-05	1.64876e-05	3.04081e-05	0	0	9.57359e-06	2.92995e-05	0	1.1976e-05	3.15693e-05	2.81423e-05	1.71749e-05	0	9.50643e-06	4.01648e-05	4.31354e-05	2.0283e-05	0	0	0	0	0	0	0
GNG	0	3.81782e-05	6.74764e-06	0	0	5.35378e-06	1.33998e-05	7.717e-06	0	0	1.70254e-05	0	0	0	0	0	1.79379e-05	0	0	0	1.50006e-05	1.0716e-05	0	0	6.06772e-06	4.6757e-05	0.000186747	7.19087e-05	5.87072e-05	6.70852e-05	2.97271e-05	5.81363e-05	5.53092e-05	6.88694e-05	8.13766e-05	3.42076e-05	0	6.08911e-05	8.90724e-05	5.07291e-05	6.97111e-05	5.16557e-05	0	0	0	0	0	0	0
GNC	0	0	0	0	0	0	0	0	0	0	0	0	0	0	0	0	0	0	0	0	0	0	0	0	0	0	0	0	0	0	0	0	0	0	0	0	0	0	1.29144e-05	0	0	0	0	0	0	0	0	0	0
GNN	0	0	6.15574e-06	0	0	0	0	0	0	6.24003e-06	0	0	0	0	0	0	0	0	0	0	0	0	0	0	0	0	1.64876e-05	0	1.7484e-05	0	1.07224e-05	0	0	0	0	0	0	0	0	0	1.83442e-05	0	0	0	0	0	0	0	0
CTG	0.0816731	0.102572	0.0863225	0.104021	0.0834337	0.0816282	0.0842849	0.0861968	0.0873231	0.0848885	0.0818758	0.0788396	0.0841429	0.0834029	0.0836263	0.0857822	0.0855862	0.0993709	0.0867698	0.0827476	0.0854869	0.0858847	0.0858503	0.0849629	0.0870846	0.0868531	0.0859293	0.102042	0.0851695	0.0849143	0.0851687	0.083022	0.103292	0.08714	0.0872017	0.0874497	0.0878074	0.0862242	0.0832269	0.0862697	0.0849862	0.0834907	0.0945463	0.0899938	0.0867586	0.11255	0.0862415	0.101372	0.0959056
CTN	0	0	0	0	0	0	0	0	0	0	0	0	0	0	0	0	0	0	0	0	0	1.07683e-05	0	0	0	0	6.88277e-05	9.87269e-05	0	0	1.07224e-05	0	2.41504e-05	0	1.81849e-05	1.41034e-05	2.00954e-05	0	8.66408e-06	0	1.76891e-05	0	0	0	0	0	0	0	0
CAN	0	0	0	0	0	0	0	4.76302e-06	0	0	0	4.94778e-06	0	0	0	0	0	0	0	0	0	0	0	0	9.57882e-06	8.50796e-06	1.7979e-05	0	5.53538e-05	0	2.10619e-05	2.17964e-05	1.08251e-05	2.32181e-05	9.8356e-06	1.14943e-05	2.00954e-05	4.40613e-05	4.63884e-05	1.90375e-05	2.30456e-05	2.02457e-05	0	0	0	0	0	0	0
CGG	0.0860954	0.0832447	0.0832027	0.0812794	0.083708	0.0876996	0.0825465	0.0828383	0.0809473	0.0814796	0.0837274	0.0875952	0.08429	0.0869739	0.0841729	0.085244	0.101257	0.084701	0.0816959	0.0852581	0.0830576	0.0814574	0.081552	0.0825003	0.0874145	0.0895655	0.0889194	0.0891809	0.0916087	0.0905762	0.0920193	0.0930977	0.0923317	0.0864826	0.0881399	0.0879416	0.0911333	0.0893498	0.0909744	0.089616	0.0898461	0.0900077	0.0845097	0.0825062	0.096935	0.0872732	0.0963405	0.100027	0.0984511
CGN	0	3.81782e-05	0	0	0	0	0	7.717e-06	0	0	8.54249e-06	0	0	0	0	0	1.79379e-05	0	0	0	1.50006e-05	1.0716e-05	0	0	1.28878e-05	1.85499e-05	8.60258e-05	4.15006e-05	1.48723e-05	1.83419e-05	4.00369e-05	4.15273e-05	2.81577e-05	1.16499e-05	2.25719e-05	2.27133e-05	0	1.42786e-05	6.63773e-05	4.83376e-05	8.30614e-05	1.90207e-05	0	0	0	0	0	0	0
CCN	0	3.81782e-05	0	6.19636e-06	1.92252e-05	0	1.33998e-05	0	0	3.4255e-06	3.40943e-06	0	0	0	0	0	0	0	0	0	1.60006e-05	1.09826e-05	0	9.8822e-06	6.90295e-06	4.61711e-05	9.89309e-05	0	3.65823e-05	6.70852e-05	3.30394e-05	2.50841e-05	5.25927e-05	3.72052e-05	7.66664e-05	3.3677e-05	2.64198e-05	2.55449e-05	4.65099e-05	7.89294e-05	4.94527e-05	2.96934e-05	0	0	0	0	0	0	0
CNG	2.63675e-05	1.27465e-05	6.74764e-06	6.19636e-06	1.92252e-05	5.35378e-06	1.33998e-05	1.55086e-05	0	3.4255e-06	2.04915e-05	4.48008e-06	0	0	0	0	0	0	0	0	0	1.09826e-05	0	9.8822e-06	3.04624e-05	3.47696e-05	1.25979e-05	5.57315e-05	0	1.78667e-05	2.79333e-05	1.90336e-05	0	2.99043e-05	2.63639e-05	8.77424e-06	2.64198e-05	3.65751e-05	1.03185e-05	6.59568e-05	3.26366e-05	2.47948e-05	0	0	0	0	0	0	0
CNN	0	0	0	0	0	0	0	0	0	0	0	0	0	0	0	0	0	0	0	0	0	0	8.31172e-06	0	0	0	1.64876e-05	0	0	0	0	0	0	0	0	0	0	0	0	0	0	0	0	0	0	0	0	0	0
NTN	0	0	0	0	0	0	0	0	0	0	0	0	0	0	0	0	0	0	0	0	0	0	0	0	0	0	0	0	0	0	0	1.20171e-05	0	0	0	0	0	0	0	0	1.79022e-05	0	0	0	0	0	0	0	0
NGN	0	0	0	0	0	0	0	0	0	0	0	0	0	0	0	0	0	0	0	0	0	0	0	0	0	0	0	0	0	0	0	0	0	0	9.95932e-06	0	0	0	0	0	0	0	0	0	0	0	0	0	0
NNN	0	0	1.23115e-05	0	0	0	0	0	0	3.02641e-06	0	0	0	0	0	0	0	0	0	0	0	0	0	0	0	0	0	0	0	0	2.14448e-05	0	0	0	0	0	0	0	0	0	0	0	0	0	0	0	0	0	0
TTTT	0.0108897	0.014718	0.0178812	0.0202483	0.0170578	0.0112174	0.0128109	0.0176738	0.0212282	0.0189006	0.0156402	0.0125399	0.0180112	0.0113012	0.017453	0.0203142	0.0211483	0.0109167	0.0195778	0.014918	0.0127721	0.015249	0.0185881	0.0130949	0.045508	0.0150441	0.0374906	0.0138354	0.0180913	0.0198322	0.0139331	0.00972679	0.00771091	0.0169063	0.0192156	0.0155533	0.017485	0.0168382	0.0107583	0.0192973	0.0194284	0.014682	0.0159144	0.0193172	0.0107155	0.0024647	0.010058	0.0090578	0.00775037
TTTA	0.0151333	0.016686	0.016743	0.0273097	0.0177678	0.0136115	0.0142161	0.026503	0.017114	0.0275139	0.0171022	0.0166423	0.0174948	0.0144479	0.0169362	0.0183097	0.0177549	0.0155463	0.0176469	0.0170285	0.016849	0.0278398	0.026839	0.0169755	0.0170637	0.0166209	0.0343601	0.0157387	0.0164754	0.0178293	0.015301	0.0150082	0.0137359	0.018253	0.0175715	0.0191623	0.0162856	0.0252567	0.0136862	0.0170834	0.0165425	0.017387	0.0216613	0.0254231	0.0155129	0.0109614	0.0173746	0.0143247	0.0158163
TTTG	0.00530294	0.00709135	0.00635965	0.00752103	0.00565989	0.00260301	0.00440833	0.00791219	0.00801471	0.00833223	0.00608624	0.00684966	0.00782903	0.00569038	0.00683788	0.00783449	0.00638384	0.00655709	0.00772761	0.00607569	0.00481547	0.0115979	0.00916451	0.00592968	0.00581967	0.00451075	0.00369179	0.00580709	0.00433418	0.0059221	0.00294385	0.00433759	0.00428904	0.00722764	0.00406411	0.00799373	0.00706624	0.00477612	0.00338088	0.00641071	0.0127299	0.00349941	0.0106908	0.009502	0.00279006	0.00234212	0.00733298	0.00299071	0.00609693
TTTC	0.0189174	0.024751	0.0183377	0.0164941	0.0189052	0.0208331	0.0178289	0.0164658	0.0162653	0.0163047	0.0170203	0.0158145	0.0149226	0.0188163	0.0174363	0.0151119	0.0176021	0.0178656	0.01522	0.0182678	0.0172845	0.0134696	0.0152928	0.0166288	0.0165479	0.018622	0.0153739	0.0155045	0.0190789	0.0177487	0.0223228	0.0206484	0.0209343	0.0126031	0.0199328	0.0135546	0.014676	0.0203767	0.0239393	0.0156585	0.0218359	0.0189121	0.0177219	0.0200688	0.0256751	0.0250962	0.0170117	0.0207242	0.018817
TTTN	0	0	0	0	0	0	0	0	0	0	0	0	0	0	0	0	0	0	0	0	0	0	0	0	0	0	1.30102e-05	2.21381e-05	0	0	8.48155e-05	1.80545e-05	2.14777e-05	1.1834e-05	2.59337e-05	0	1.31686e-05	1.09794e-05	0	3.21245e-05	2.33546e-05	8.37412e-06	0	0	0	0	0	0	0
TTAT	0.00691771	0.010571	0.00803032	0.0213503	0.00800597	0.00604035	0.0101787	0.0197251	0.0104938	0.0113177	0.0112611	0.0108414	0.0129461	0.00705404	0.00882485	0.010649	0.0102694	0.00787916	0.0107558	0.00886941	0.0105985	0.0204394	0.0118017	0.0102274	0.0110659	0.00827455	0.0224916	0.0114671	0.00632912	0.0080275	0.00623629	0.00645872	0.00762414	0.0179571	0.00873998	0.0127138	0.0116909	0.0180812	0.00704256	0.01254	0.00866626	0.00906852	0.00959514	0.0106544	0.00297302	0.00296854	0.00995583	0.00537946	0.00756586
TTAA	0.00103396	0.00238713	0.00438382	0.00344015	0.00340484	0.00156259	0.00154878	0.00336911	0.00352512	0.023549	0.00334419	0.00183009	0.00258088	0.00372679	0.00432876	0.00306374	0.00215696	0.0052144	0.00328568	0.00206625	0.00178474	0.00557534	0.0244753	0.00249451	0.00307514	0.00300796	0.00137845	0.00399145	0.00442449	0.00642178	0.00264336	0.00239598	0.00118006	0.00153414	0.0023965	0.00234824	0.00290396	0.00255622	0.00140378	0.0028474	0.00225885	0.00400586	0.0116917	0.0113752	0.0046274	0.0023594	0.00291859	0.00138358	0.00178553
TTAG	0.0142065	0.0134831	0.0137716	0.0143923	0.0144716	0.0140483	0.0136579	0.0139933	0.014261	0.0120693	0.0137175	0.0144141	0.0139124	0.0130047	0.0144973	0.0137401	0.0141752	0.0144847	0.0152977	0.0145546	0.0125113	0.0140432	0.0127545	0.0124032	0.014157	0.0153324	0.0159405	0.0137476	0.0153591	0.0151771	0.013412	0.0151242	0.0137347	0.0138778	0.0157643	0.0166901	0.0140652	0.0156565	0.0149182	0.0141873	0.0159966	0.015883	0.012449	0.00860145	0.0113545	0.0186511	0.0157583	0.0200454	0.0169871
TTAC	0.0291655	0.0258011	0.0365976	0.0333999	0.0256692	0.0303227	0.0269861	0.0349174	0.0254762	0.0263529	0.0361911	0.0262653	0.0253362	0.0378711	0.0249393	0.0236519	0.0251567	0.0268036	0.0246237	0.0261389	0.0372621	0.0337408	0.0252787	0.0367598	0.0240185	0.0262763	0.0359503	0.0266562	0.0290216	0.0255437	0.0293083	0.0310786	0.0311208	0.0260772	0.0373944	0.0253467	0.0239793	0.0385454	0.0320354	0.0265762	0.0297572	0.0287064	0.0309171	0.0326489	0.0367577	0.0315888	0.0277372	0.0267204	0.0300912
TTAN	0	0	0	0	0	0	0	8.31677e-06	0	6.46572e-06	0	0	0	0	0	0	0	0	0	0	0	0	0	0	6.82012e-06	0	0	3.05838e-05	0	0	9.61173e-06	0	3.17591e-05	2.52531e-05	1.60745e-05	0	0	0	2.34007e-05	5.4431e-05	7.87671e-05	0	0	0	0	0	0	0	0
TTGT	0.0182621	0.016837	0.0161496	0.0179726	0.0154482	0.0137848	0.0160585	0.0174196	0.017993	0.0165528	0.0162388	0.0381719	0.0273974	0.0166841	0.0161983	0.0165776	0.0157031	0.0163472	0.0171246	0.0172883	0.0157179	0.0179313	0.0173687	0.0161149	0.018171	0.0162441	0.017398	0.0179204	0.0151573	0.01648	0.0144895	0.0145967	0.0164601	0.0180101	0.016594	0.0164306	0.0176883	0.0151734	0.0134141	0.0164214	0.015559	0.0144127	0.0187829	0.0150126	0.012748	0.022525	0.0191371	0.021882	0.0175891
TTGA	0.00669901	0.00792329	0.00447142	0.00477563	0.00588904	0.00344162	0.00462425	0.00650038	0.00506195	0.00677931	0.00669171	0.00674199	0.0155368	0.00606066	0.00658193	0.00732021	0.00551202	0.00826802	0.00594597	0.00726434	0.00676622	0.00753143	0.00659006	0.00681123	0.00545892	0.00524108	0.00611878	0.00629339	0.0057171	0.00831148	0.00392544	0.00576074	0.00672436	0.00718419	0.00594348	0.0083633	0.00555531	0.00435493	0.00418138	0.00596132	0.00519282	0.00684297	0.00527851	0.00397348	0.00396957	0.0017659	0.00902427	0.00785498	0.00806813
TTGG	0.0265913	0.0114726	0.0104421	0.0139845	0.0122465	0.00556401	0.00864752	0.011761	0.012854	0.0142366	0.0113784	0.00894898	0.0113809	0.00678856	0.0117423	0.0151361	0.0148766	0.00907281	0.0133197	0.0119442	0.010452	0.0117924	0.0129421	0.0111341	0.0112868	0.00914191	0.0091357	0.0102166	0.00868771	0.0112769	0.0076109	0.00587287	0.00623771	0.012774	0.0110437	0.013315	0.0124808	0.00913829	0.00572028	0.0128488	0.0277072	0.0268373	0.0172817	0.017176	0.00473186	0.00604178	0.00988392	0.00494758	0.007356
TTGC	0.0178116	0.0161427	0.0161024	0.0142613	0.0161584	0.018064	0.0158057	0.0158368	0.0230488	0.0159768	0.016439	0.0163068	0.0146451	0.0173509	0.0152271	0.0154827	0.0150372	0.0173257	0.0159337	0.0170792	0.0155138	0.0159678	0.0144398	0.0156997	0.0174247	0.0183556	0.0171163	0.0166124	0.0176155	0.0163248	0.0190195	0.019907	0.0187004	0.0145898	0.0148191	0.0159219	0.0156803	0.0174759	0.0186096	0.016501	0.0162846	0.0172408	0.019662	0.0201195	0.0215721	0.012296	0.0191691	0.020332	0.01979
TTGN	0	0	0	0	0	0	0	0	0	0	0	0	0	0	0	0	0	0	0	0	0	0	0	0	0	7.3651e-06	1.76247e-05	3.04081e-05	0	0	0	0	1.37825e-05	0	0	8.84173e-06	1.14975e-05	0	1.29144e-05	0	0	0	0	0	0	0	0	0	0
TTCT	0.0223551	0.0210844	0.0265847	0.0256582	0.0270423	0.0303121	0.027486	0.0230315	0.0258165	0.0217734	0.0220343	0.0189255	0.0213052	0.0265327	0.0243552	0.0302799	0.0239568	0.0241412	0.0247686	0.0234302	0.0240411	0.0224814	0.023236	0.0239079	0.0254645	0.0271305	0.022919	0.0269097	0.0322195	0.0299044	0.0321811	0.0280888	0.0244981	0.0202345	0.028098	0.0207522	0.0241628	0.0302436	0.0306355	0.0247849	0.028498	0.0300524	0.0178744	0.0132191	0.0317093	0.0301622	0.0205675	0.0292522	0.0261604
TTCA	0.0136722	0.0150521	0.0160724	0.0175936	0.0157648	0.0170161	0.017972	0.015532	0.0175957	0.0150456	0.0151072	0.0150768	0.0185398	0.0144323	0.0147232	0.015878	0.0152258	0.0135679	0.0163679	0.0135842	0.0155579	0.014969	0.0168209	0.0155798	0.0167529	0.0153772	0.0162126	0.0166652	0.0187098	0.0178995	0.0169739	0.0159153	0.0146335	0.0175976	0.0179325	0.0160225	0.0157749	0.0182707	0.0173664	0.0165516	0.018041	0.0181111	0.00803096	0.0106597	0.0152239	0.0191024	0.0120632	0.00663989	0.0111994
TTCG	0.0178482	0.0147048	0.0155064	0.0142328	0.0159453	0.0167832	0.0151712	0.0144967	0.0141529	0.0142901	0.0155251	0.0180809	0.0147732	0.0170813	0.0156716	0.0145264	0.0154248	0.018504	0.0138862	0.0166148	0.0148888	0.0333024	0.0135596	0.0146331	0.0170679	0.0177805	0.0147566	0.0160668	0.0149938	0.0150814	0.0186884	0.0181602	0.0185984	0.0124247	0.0157917	0.0135108	0.0157023	0.0162515	0.0195857	0.0153227	0.0175104	0.0166829	0.0213863	0.0184751	0.0190767	0.0105384	0.0198538	0.0162944	0.0146543
TTCC	0.0241702	0.0446007	0.0249368	0.0268914	0.0261895	0.0456403	0.0257378	0.025881	0.0250372	0.0251376	0.024643	0.0247188	0.0263985	0.0241772	0.0268574	0.0270469	0.026904	0.0246342	0.0250013	0.0269733	0.0257982	0.0241886	0.0239621	0.025528	0.0266075	0.0269706	0.0277084	0.0257252	0.0278401	0.0273394	0.0267747	0.0271147	0.0263851	0.0279963	0.0275562	0.0289311	0.0263258	0.0268741	0.0453602	0.0272226	0.0269033	0.0264989	0.0209287	0.0209623	0.0270112	0.0285503	0.0255699	0.0243464	0.027205
TTCN	0	0	0	0	0	0	1.33998e-05	0	0	0	3.32708e-06	0	0	0	0	0	0	0	0	0	0	0	0	0	3.13421e-05	1.79882e-05	6.38947e-05	0	0	3.57334e-05	2.70693e-05	0	0	2.67249e-05	1.00862e-05	1.14943e-05	9.24492e-06	3.64598e-05	0	6.25972e-05	2.14568e-05	2.93066e-05	0	0	0	0	0	0	0
TTNT	0	0	0	0	0	0	0	4.76302e-06	0	1.50954e-06	1.86137e-06	0	0	0	0	0	0	0	0	0	0	0	0	0	0	0	3.43068e-05	4.92715e-05	0	0	0.000158371	5.57685e-05	1.08251e-05	1.1834e-05	4.81574e-05	1.44582e-05	1.31686e-05	5.09079e-05	0	0	7.10395e-05	8.37412e-06	0	0	0	0	0	0	0
TTNA	0	0	0	0	0	0	0	0	0	0	0	0	0	0	0	0	0	0	0	0	0	0	0	0	0	0	0	0	0	0	1.21846e-05	0	0	0	0	1.41034e-05	0	0	0	0	0	0	0	0	0	0	0	0	0
TTNG	0	0	0	0	0	0	0	0	0	0	0	0	0	0	0	0	0	0	0	0	0	0	0	0	0	0	0	0	0	0	0	0	1.06526e-05	0	6.18567e-06	0	0	1.09794e-05	0	3.21245e-05	1.16085e-05	0	0	0	0	0	0	0	0
TTNC	0	0	0	0	0	0	0	0	0	0	0	0	0	0	0	0	0	0	0	0	0	0	0	0	0	5.40286e-06	0	1.97426e-05	3.27935e-05	0	0	2.65312e-05	0	0	2.78556e-05	0	0	0	1.20788e-05	0	1.1654e-05	0	0	0	0	0	0	0	0
TTNN	0	0	0	0	0	0	0	0	0	0	0	0	0	0	0	0	0	0	0	0	0	0	0	0	0	0	2.15531e-05	0	0	0	0	0	0	0	8.89624e-06	0	0	0	0	0	0	0	0	0	0	0	0	0	0
TATT	0.0160935	0.0341526	0.019833	0.0342137	0.0224339	0.0130457	0.0192031	0.0323039	0.0238643	0.0344392	0.0313975	0.0223798	0.0236245	0.0277195	0.0235162	0.0260737	0.0248064	0.0199134	0.0253865	0.0235288	0.0328525	0.0352562	0.0331484	0.0341786	0.036659	0.0232636	0.0344401	0.0254715	0.0185611	0.0239899	0.018504	0.0157322	0.0169318	0.0297833	0.0308633	0.0284538	0.0272772	0.028063	0.0131647	0.0253485	0.0269437	0.0196856	0.0254613	0.0209559	0.00994513	0.0296927	0.0219102	0.0223462	0.0216817
TATA	0.00147694	0.00128593	0.0115738	0.00196384	0.00115981	0.00153736	0.00219964	0.001197	0.00129694	0.00112456	0.00166185	0.00206035	0.00246231	0.00150935	0.00192241	0.000967975	0.00223666	0.00171989	0.00161562	0.00188439	0.00157734	0.000882415	0.00202906	0.00111198	0.00116435	0.00147653	0.00272883	0.00163443	0.000966158	0.00111539	0.000734638	0.00152358	0.00112612	0.00212278	0.00145567	0.00133427	0.00164518	0.00166107	0.00173328	0.00129373	0.00196345	0.00158423	0.00110109	0.000460546	3.66391e-05	6.24932e-05	0.000602512	0.00201536	9.16058e-05
TATG	0.00810593	0.00955836	0.00391342	0.00544168	0.0253408	0.0048989	0.00622654	0.00706347	0.0159434	0.00609028	0.00872108	0.0103749	0.00698219	0.0147807	0.00582557	0.00710031	0.00811412	0.0065486	0.0073759	0.00602925	0.00737026	0.0088904	0.00577711	0.00742235	0.00631149	0.00612882	0.00905255	0.00610197	0.00466699	0.00565008	0.00359972	0.00627526	0.00788668	0.0100064	0.00751964	0.0130206	0.00689165	0.00629029	0.00642725	0.00722203	0.00605741	0.00718544	0.00279512	0.00355062	0.000820821	0.00110016	0.0104036	0.00182005	0.00827952
TATC	0.00543157	0.00487148	0.0040234	0.00424456	0.00467851	0.00647188	0.00528006	0.00547178	0.00423221	0.00380796	0.0139605	0.00435197	0.00430486	0.00549185	0.00428565	0.0150866	0.00462531	0.00423563	0.0240484	0.00474929	0.00582741	0.00432063	0.00330782	0.0156111	0.0031484	0.00531911	0.00605147	0.00327194	0.00563023	0.00482434	0.00531858	0.00614127	0.0060217	0.0036675	0.0147879	0.00659763	0.00333253	0.00555579	0.00752705	0.00398023	0.0056484	0.00704173	0.00162249	0.00336629	0.00702754	0.00721763	0.00589051	0.00245613	0.00583455
TATN	0	0	0	0	0	0	0	0	0	0	0	0	0	0	0	0	0	0	0	0	0	0	0	0	0	0	0	0	0	0	0	0	0	1.16499e-05	0	0	0	0	0	0	4.45113e-05	0	0	0	0	0	0	0	0
TAAT	0.0139094	0.0162612	0.0255884	0.0161775	0.0161341	0.0124833	0.0131405	0.0172764	0.0160119	0.0476776	0.0260838	0.0157454	0.0165256	0.0254616	0.0169261	0.0179044	0.0153838	0.0167841	0.0166963	0.0166145	0.0152458	0.0277003	0.0272226	0.025935	0.0143473	0.0154972	0.0144898	0.0149781	0.0155884	0.0183359	0.0133422	0.0143925	0.0140847	0.0165058	0.0243131	0.0175123	0.0147724	0.0144476	0.0132426	0.0153248	0.0145384	0.0154694	0.0237442	0.0251862	0.0153333	0.0204173	0.0169781	0.0134953	0.0155407
TAAG	0.0102425	0.00978288	0.00963941	0.00940179	0.00806771	0.0122319	0.0117358	0.0188363	0.0103844	0.0100019	0.00979139	0.00888692	0.00938175	0.0100425	0.00790142	0.00679593	0.0079351	0.00788967	0.00887112	0.00843989	0.0207063	0.00884563	0.0103609	0.0102987	0.0103558	0.00865413	0.0112514	0.0134679	0.0110564	0.00804888	0.0122457	0.012444	0.0128284	0.0153502	0.00985854	0.00981842	0.0120257	0.0215055	0.0136316	0.0118682	0.011673	0.0102928	0.00848396	0.00669704	0.0142852	0.00407718	0.00951451	0.00560915	0.0103372
TAAC	0.0130725	0.011693	0.0151819	0.023075	0.0129869	0.0152043	0.0148133	0.0127421	0.0137585	0.0115131	0.0148269	0.0139012	0.0139457	0.0153353	0.0151553	0.011118	0.0128245	0.0193761	0.0140343	0.0116125	0.0111068	0.0149651	0.034318	0.0111133	0.0136252	0.0151392	0.0169608	0.0156394	0.0164091	0.0173774	0.0133712	0.0155981	0.0142333	0.0109077	0.0148583	0.0129227	0.0124809	0.0161278	0.0162587	0.0147771	0.0161771	0.0185121	0.0224774	0.0173427	0.0151967	0.0224767	0.0153293	0.0214456	0.0165157
TAAN	0	0	0	0	0	0	0	0	0	4.61814e-06	0	0	0	0	0	0	0	0	0	0	0	0	0	0	0	0	1.37081e-05	0	0	0	0	7.76768e-06	0	0	0	0	0	0	1.63547e-05	1.55635e-05	1.16085e-05	8.37412e-06	0	0	0	0	0	0	0
TAGT	0.00985504	0.0077186	0.0106336	0.00964265	0.009575	0.0102165	0.00850897	0.00880427	0.00813054	0.00702199	0.00874761	0.00988154	0.00884755	0.0106301	0.0104627	0.00728246	0.00776052	0.0106752	0.0175314	0.00885359	0.00722772	0.00958628	0.00855257	0.00727043	0.00812694	0.0106962	0.00930248	0.00911541	0.0108729	0.0103571	0.0101346	0.0203435	0.0106975	0.0061454	0.00980496	0.0074888	0.00917067	0.00992993	0.0103651	0.008145	0.0109259	0.0109549	0.010547	0.0105163	0.0104097	0.00174392	0.0103331	0.0102429	0.00841118
TAGA	0.00383001	0.0026762	0.00303876	0.00359978	0.00390351	0.00379869	0.00313913	0.00306312	0.00273676	0.00233205	0.00463032	0.00333706	0.00302298	0.00309623	0.00363033	0.0233726	0.0042445	0.00441633	0.0130315	0.00377831	0.0126637	0.00251759	0.00191044	0.00289822	0.00226654	0.00413164	0.00615432	0.00204395	0.00387065	0.00399908	0.0026865	0.0131525	0.00359849	0.0110832	0.00461409	0.00311947	0.00241535	0.00439238	0.00373488	0.00357117	0.00432455	0.00528599	0.00187042	0.00176774	0.000810279	0.00146383	0.00528761	0.00336365	0.000997014
TAGG	0.00925905	0.00982271	0.006821	0.00520882	0.00723644	0.0188612	0.00742043	0.0068747	0.0066774	0.00555163	0.00673216	0.00851061	0.00619175	0.0074795	0.00807413	0.00645565	0.0175386	0.0107653	0.00746598	0.00658434	0.0066915	0.0088536	0.00579403	0.00629652	0.00612263	0.0178438	0.00818091	0.00713547	0.00742481	0.00587895	0.00733253	0.0113812	0.00824988	0.00715245	0.00846207	0.0127762	0.00557304	0.00942659	0.0215583	0.0162245	0.00926137	0.00898168	0.00488465	0.00369811	0.00762879	0.00162319	0.00896489	0.00371687	0.0113785
TAGC	0.0143401	0.0155654	0.0126882	0.0131363	0.013834	0.0128823	0.0125422	0.0147874	0.0138053	0.0134808	0.0135121	0.0141438	0.0138067	0.0136422	0.0131593	0.0156024	0.0137453	0.013325	0.0148541	0.0137667	0.014664	0.0152467	0.0126907	0.013982	0.0130858	0.0143708	0.0142348	0.014096	0.0149234	0.0153071	0.0124167	0.014753	0.013818	0.0144864	0.0144433	0.0457075	0.013493	0.0138721	0.0126365	0.0134017	0.0134039	0.0141877	0.0108841	0.0083857	0.0116178	0.024779	0.0157387	0.018977	0.0178316
TAGN	0	0	0	0	0	0	0	0	0	0	0	0	0	0	0	0	0	0	0	0	0	0	0	0	0	0	0	0	1.70678e-05	0	0	0	0	0	0	0	0	0	0	0	0	1.18715e-05	0	0	0	0	0	0	0
TACT	0.00920487	0.00798976	0.00710019	0.00528247	0.0072075	0.00903424	0.00710262	0.0069742	0.00690514	0.0060085	0.00747337	0.0174784	0.00743593	0.00766895	0.00727716	0.00616367	0.00797165	0.0090899	0.0165828	0.00710875	0.00790796	0.00614026	0.00529128	0.00719532	0.00556284	0.00604816	0.0075549	0.00681127	0.00800898	0.00579093	0.0071497	0.0186827	0.0179078	0.00702816	0.00969303	0.00902091	0.00636364	0.00894818	0.0112636	0.00843688	0.00969798	0.00916389	0.00525093	0.00465221	0.00764164	0.0173482	0.00769483	0.0042849	0.00711444
TACA	0.0133022	0.0145949	0.0326839	0.0160122	0.0135108	0.0115002	0.0124843	0.0139394	0.0141643	0.0136503	0.0142436	0.0138048	0.022755	0.0131008	0.0152157	0.0121555	0.0132866	0.0248847	0.0139675	0.0229617	0.0139239	0.0154426	0.0145913	0.0141054	0.0133488	0.0133065	0.0138407	0.0238831	0.0238771	0.0158797	0.0121062	0.0137595	0.0129471	0.0149435	0.0163437	0.0163239	0.0130779	0.0137456	0.0126239	0.0134154	0.0151926	0.0144208	0.0165362	0.0184762	0.012989	0.0112853	0.0150332	0.0135638	0.014717
TACG	0.023383	0.022481	0.0214988	0.0200833	0.0508044	0.025165	0.03536	0.0206151	0.0214776	0.0212626	0.0220889	0.0225469	0.021437	0.0223736	0.0695358	0.0410923	0.0224871	0.0221569	0.0206253	0.0235652	0.0234806	0.019258	0.020797	0.0228177	0.022856	0.0230952	0.0256312	0.0227032	0.0220329	0.0466868	0.0336985	0.0251472	0.0257795	0.0228907	0.0225715	0.0220956	0.021767	0.0236074	0.0265983	0.0228474	0.0236644	0.0219546	0.0177937	0.0185769	0.0260416	0.0130368	0.023847	0.024497	0.0246026
TACC	0.0385688	0.0283783	0.0282746	0.0263295	0.0275143	0.0274599	0.0270089	0.0278623	0.0280371	0.0284665	0.0271941	0.0281235	0.026785	0.0284947	0.0274616	0.028168	0.0266933	0.0271672	0.0262668	0.0282057	0.0273513	0.02884	0.0285684	0.0276672	0.0282015	0.0288885	0.0285813	0.0269691	0.0272489	0.0264896	0.0296582	0.0295141	0.0303987	0.0269753	0.0273098	0.0275632	0.0390773	0.0283053	0.0282566	0.0276795	0.0272144	0.0350082	0.0343261	0.0318558	0.0316933	0.0165811	0.0302614	0.0322223	0.0322514
TACN	0	0	0	0	0	0	0	0	0	0	3.56842e-06	0	0	0	0	0	0	0	0	0	0	0	0	0	0	0	0	0	0	0	1.3403e-05	8.76782e-06	0	0	0	0	0	0	0	3.80749e-05	0	0	0	0	0	0	0	0	0
TANT	0	0	0	0	0	0	0	0	0	0	0	0	0	0	0	0	0	0	0	0	0	0	0	0	0	0	0	0	0	0	0	0	0	0	0	0	0	0	0	0	0	0	0	0	0	0	0	0	0
TANA	0	0	0	0	0	0	0	0	0	1.50954e-06	0	0	0	0	0	0	0	0	0	0	0	0	0	0	0	0	0	9.87269e-05	3.33481e-05	0	0	0	0	0	1.60745e-05	0	0	0	8.24654e-06	0	4.60345e-05	0	0	0	0	0	0	0	0
TANG	0	0	0	0	0	0	0	0	0	3.16468e-06	0	0	0	0	0	0	0	0	0	0	0	0	0	0	0	0	0	0	0	0	0	0	1.63036e-05	0	0	1.05938e-05	0	0	1.51542e-05	2.20953e-05	1.98118e-05	0	0	0	0	0	0	0	0
TANC	0	0	0	0	0	0	0	1.66335e-05	0	1.7915e-06	0	0	0	0	0	0	0	0	0	0	0	0	0	0	6.82012e-06	6.46456e-06	0	3.05838e-05	0	0	9.61173e-06	2.65312e-05	1.54555e-05	3.70872e-05	0	0	0	1.42786e-05	1.25975e-05	3.23357e-05	2.82391e-05	0	0	0	0	0	0	0	0
TANN	0	0	0	0	0	0	0	0	0	0	0	0	0	0	0	0	0	0	0	0	0	0	0	0	0	0	0	0	0	0	0	0	0	0	0	0	0	0	0	0	0	0	0	0	0	0	0	0	0
TGTT	0.00909444	0.00644521	0.00781323	0.00701747	0.00828613	0.00985555	0.00884685	0.00740352	0.00637377	0.00765663	0.00907361	0.00629217	0.00696398	0.00747595	0.00751824	0.0071809	0.00862063	0.0100505	0.00721062	0.0098472	0.00664611	0.00530146	0.00783273	0.00686115	0.00626023	0.00720529	0.00902985	0.00714914	0.00863938	0.00745155	0.00798288	0.00862282	0.00835887	0.0051674	0.00859812	0.00577304	0.00504132	0.0092924	0.0107135	0.00843174	0.00957029	0.00971769	0.0133318	0.0104119	0.0108932	0.00541739	0.00881747	0.0114748	0.00835757
TGTG	0.0345504	0.0312997	0.0316266	0.0290036	0.0324346	0.0369912	0.0344269	0.0299026	0.0303008	0.0298906	0.0311604	0.0296504	0.0106402	0.0140412	0.0112514	0.00984887	0.0122364	0.0121032	0.0114647	0.0137925	0.0136385	0.00856372	0.00955979	0.01266	0.0138838	0.01282	0.0107941	0.0130583	0.0141976	0.0106547	0.0179085	0.0171591	0.0168037	0.0110927	0.0150161	0.00982417	0.0121243	0.015356	0.0195102	0.012624	0.0160022	0.0157387	0.00746851	0.00791133	0.0223081	0.0351131	0.010263	0.0127279	0.015066
TGTC	0.00216527	0.00592963	0.00945193	0.0107689	0.00642491	0.00383823	0.00694543	0.0087909	0.0116596	0.00828729	0.0055885	0.00445265	0.0087662	0.00621212	0.00708303	0.00849656	0.00635446	0.00445313	0.00995555	0.00498265	0.00447907	0.0105395	0.011556	0.0050417	0.00636632	0.00693913	0.00605279	0.00577437	0.00603488	0.00798248	0.00389064	0.0027159	0.00247528	0.0072293	0.00584388	0.00547217	0.00697459	0.00629047	0.00267044	0.00630984	0.00494832	0.00374292	0.00734861	0.00446483	0.00073963	0.00279052	0.00240309	0.00300377	0.00301267
TGTN	0	0	0	0	0	0	0	0	0	0	0	0	0	0	0	0	0	0	0	0	0	0	0	0	0	0	0	0	0	1.61134e-05	0	0	0	0	0	0	0	0	0	1.56779e-05	0	0	0	0	0	0	0	0	0
TGAT	0.00684133	0.00762801	0.00792563	0.00857927	0.00776376	0.00468715	0.00647117	0.00942362	0.0085819	0.00854342	0.0261877	0.00852946	0.0185739	0.00871219	0.0084538	0.0102829	0.00769166	0.0181505	0.00891484	0.0185946	0.00789782	0.00885444	0.00782181	0.0086869	0.00969359	0.00862591	0.00707741	0.0185171	0.0156083	0.00888424	0.00669239	0.00527529	0.00812132	0.00873472	0.00583726	0.00549979	0.010384	0.00550821	0.00398916	0.00865731	0.0050473	0.00646333	0.00769601	0.00316345	0.0026486	0.011146	0.00681922	0.00870502	0.00467979
TGAG	0.0143006	0.0112347	0.00963277	0.00765773	0.0101712	0.0130744	0.010755	0.00966133	0.00842337	0.00946389	0.0112621	0.0137702	0.00983816	0.01142	0.0093974	0.00865925	0.00975771	0.010535	0.00859841	0.0105293	0.0123923	0.00856097	0.00900426	0.0115764	0.00947552	0.0113609	0.0121826	0.00926135	0.0111771	0.00859693	0.012183	0.0139437	0.0151962	0.0106198	0.0118862	0.0109457	0.00892032	0.0119125	0.01478	0.00956286	0.0123231	0.0124346	0.00869595	0.0129399	0.0175692	0.00191248	0.0141607	0.0119144	0.0147737
TGAC	0.0197253	0.0219509	0.0184764	0.0200994	0.0194548	0.0189577	0.0189782	0.0201438	0.0189589	0.0197715	0.020904	0.0186953	0.0181809	0.0199668	0.0192856	0.021104	0.0205408	0.0195214	0.0202501	0.0195525	0.0184824	0.0203974	0.0199477	0.0191404	0.0174606	0.0205205	0.0206419	0.0198723	0.0204578	0.0211296	0.0195296	0.0211026	0.0223395	0.02795	0.0201196	0.0202265	0.019092	0.0207894	0.019704	0.0192972	0.0206465	0.0203611	0.0162988	0.0168601	0.0200337	0.0193896	0.0230969	0.0212985	0.0210316
TGAN	0	0	0	0	0	0	0	0	0	0	0	0	0	0	0	0	0	0	0	0	0	0	0	0	0	0	0	0	0	0	1.14883e-05	0	0	0	8.89624e-06	0	0	0	0	0	0	0	0	0	0	0	0	0	0
TGGT	0.0244598	0.0133744	0.00899196	0.0107749	0.0124952	0.0100932	0.0102219	0.0120324	0.0102287	0.0117876	0.0129622	0.0125164	0.0109826	0.00942767	0.0114718	0.0157086	0.0133595	0.0113839	0.0117216	0.0123434	0.0123965	0.0115792	0.0106122	0.0119488	0.00926203	0.00970243	0.0115702	0.0107043	0.0101634	0.00933924	0.00920676	0.012011	0.0129535	0.0127796	0.012269	0.0162894	0.0112659	0.0113956	0.0123005	0.0218093	0.0126012	0.0201511	0.0105687	0.0117215	0.00967873	0.00242458	0.015966	0.0055384	0.0127973
TGGA	0.0198909	0.00953275	0.0139815	0.0145993	0.0136094	0.023442	0.0139404	0.013145	0.014859	0.0157373	0.0136478	0.00884093	0.0117882	0.0113268	0.0133693	0.0107975	0.0222626	0.0112062	0.0133185	0.0119128	0.0123189	0.0125313	0.015183	0.0130511	0.0142924	0.0125401	0.0105703	0.0139409	0.0135823	0.013438	0.015876	0.0115397	0.0103351	0.0134813	0.0132773	0.0117491	0.0135784	0.0145268	0.0232363	0.0136079	0.0136995	0.0218117	0.0238697	0.0292098	0.0208285	0.0050386	0.00992854	0.00700895	0.00999159
TGGG	0.0145414	0.0165961	0.0132354	0.0140408	0.0141145	0.00923542	0.0112042	0.0150829	0.0140959	0.0151748	0.01295	0.0172281	0.0148924	0.0143545	0.0136176	0.015756	0.0151486	0.0134217	0.0148769	0.015369	0.0141925	0.0168268	0.0141326	0.0147796	0.0194782	0.024912	0.013805	0.0156683	0.0100346	0.0135503	0.0138299	0.011355	0.0139901	0.0175746	0.0121753	0.0158053	0.0196515	0.0102894	0.00786768	0.0164913	0.00941925	0.0103072	0.0181207	0.0127559	0.00681583	0.0205011	0.0180667	0.0185451	0.0162174
TGGC	0.0144018	0.0160961	0.0163306	0.0171007	0.0156585	0.0145366	0.0163107	0.0163066	0.0167712	0.0161464	0.0164751	0.0162535	0.0168749	0.0346297	0.0163994	0.0172705	0.0167564	0.0171442	0.0173608	0.0152428	0.0153805	0.0168341	0.0173258	0.0156438	0.0172096	0.0164044	0.0183079	0.0173509	0.0162851	0.0182087	0.0145888	0.015231	0.0146487	0.0186583	0.0167551	0.0174685	0.017121	0.0166056	0.0146666	0.0178261	0.0173339	0.016904	0.0164296	0.0153131	0.0118251	0.0258453	0.0179458	0.0138576	0.0147653
TGGN	0	0	0	0	0	0	0	0	0	0	3.32708e-06	0	0	0	0	0	0	0	0	0	0	0	0	0	0	7.40192e-06	2.04447e-05	0	0	0	3.32234e-05	0	0	0	0	0	0	0	0	0	0	0	0	0	0	0	0	0	0
TGCT	0.0306709	0.0316137	0.0309587	0.0320104	0.0312939	0.030891	0.0320005	0.0319309	0.0328213	0.0312596	0.0306422	0.0318905	0.0318606	0.0305684	0.0311249	0.0302062	0.0325529	0.0306645	0.0322987	0.0312001	0.031979	0.0305523	0.0307243	0.0318827	0.0383395	0.0332705	0.0329828	0.0363383	0.0330819	0.0331243	0.0346035	0.0310959	0.0308804	0.036789	0.032634	0.0438553	0.0370518	0.0328376	0.030729	0.0350653	0.0317043	0.0313267	0.0339054	0.0297192	0.0313039	0.0467901	0.0321034	0.0356732	0.0327912
TGCA	0.00961037	0.0103179	0.00673349	0.00638634	0.00782252	0.00560044	0.00831563	0.00794191	0.0274291	0.00863254	0.00710602	0.0108804	0.00968126	0.00764899	0.00798445	0.0118026	0.0102352	0.00590612	0.00888992	0.0103137	0.0108446	0.00845828	0.00655997	0.010375	0.0106903	0.00956921	0.0108966	0.0079295	0.00508754	0.00626828	0.0068073	0.00657897	0.00964693	0.0109406	0.00720337	0.0119778	0.00982619	0.00587812	0.00539307	0.00890972	0.00636873	0.0064838	0.00654702	0.00528871	0.00443797	0.0174611	0.0110517	0.0219312	0.0161513
TGCG	0.00456909	0.00584472	0.00734342	0.0063818	0.00648537	0.00588667	0.00459583	0.00691326	0.00559534	0.00672804	0.00773816	0.00591358	0.00702567	0.00706475	0.00698935	0.00661243	0.00684805	0.00851214	0.007481	0.00586127	0.00540279	0.00809374	0.00613251	0.00599781	0.00780327	0.0072634	0.00607836	0.0091274	0.00818101	0.00908181	0.00692636	0.00606432	0.00439033	0.00840571	0.00585426	0.00592385	0.00917421	0.00694885	0.00573836	0.0103041	0.00616818	0.00961035	0.00898092	0.0081649	0.00544968	0.0118315	0.00739276	0.00903464	0.00620906
TGCC	0.0249028	0.024559	0.0272762	0.027383	0.0253959	0.0268733	0.0258405	0.0258335	0.0262316	0.0264956	0.02527	0.0229931	0.025064	0.0265158	0.0255403	0.023211	0.0243085	0.0259754	0.0256884	0.0232755	0.0250969	0.0274407	0.0270939	0.0251287	0.02749	0.027246	0.0253405	0.0299948	0.0295539	0.0282756	0.0281048	0.028341	0.0261545	0.0275109	0.0254532	0.0258868	0.0282337	0.0279151	0.0271214	0.0275824	0.0263089	0.0272178	0.0318024	0.0316016	0.0309653	0.0310093	0.0261962	0.0248194	0.0267938
TGCN	0	0	0	0	0	0	0	0	0	3.4255e-06	7.16437e-06	0	0	0	0	0	0	0	0	0	0	0	0	9.8822e-06	8.69913e-06	8.70815e-06	1.64876e-05	3.04081e-05	0	0	0	1.02658e-05	0	1.1976e-05	8.16253e-06	8.77424e-06	0	0	0	1.80695e-05	1.06515e-05	1.01415e-05	0	0	0	0	0	0	0
TGNT	0	0	0	0	0	0	0	0	0	0	0	0	0	0	0	0	0	0	0	0	0	0	0	0	0	1.49725e-05	0	0	1.79211e-05	0	0	0	0	1.13841e-05	0	2.0336e-05	1.17969e-05	1.45656e-05	1.06393e-05	1.90375e-05	0	0	0	0	0	0	0	0	0
TGNA	0	0	0	0	0	0	0	0	0	0	0	0	0	0	0	0	0	0	0	0	0	0	0	0	0	5.40286e-06	0	0	0	0	0	0	1.06103e-05	0	0	0	1.14975e-05	0	0	0	0	0	0	0	0	0	0	0	0
TGNG	0	0	6.74764e-06	0	0	0	1.33998e-05	0	0	0	0	0	0	0	0	0	0	0	0	0	0	0	0	0	0	7.3651e-06	4.84326e-05	3.04081e-05	0	0	0	0	2.71514e-05	1.42572e-05	7.33116e-06	1.14943e-05	0	1.81159e-05	1.77611e-05	0	0	1.06219e-05	0	0	0	0	0	0	0
TGNC	0	0	0	0	0	0	0	0	0	0	0	0	0	0	0	0	0	0	0	0	0	0	0	0	0	0	0	0	0	0	0	0	0	0	0	0	0	0	1.29144e-05	0	0	0	0	0	0	0	0	0	0
TGNN	0	0	6.15574e-06	0	0	0	0	0	0	6.24003e-06	0	0	0	0	0	0	0	0	0	0	0	0	0	0	0	0	0	0	0	0	0	0	0	0	0	0	0	0	0	0	0	0	0	0	0	0	0	0	0
TCTT	0.0234312	0.0200586	0.026969	0.0280657	0.0256527	0.0336892	0.0319092	0.0224592	0.0255323	0.0214359	0.02275	0.0406117	0.0231557	0.0264268	0.0239637	0.0180465	0.0214182	0.0230535	0.0229151	0.0224324	0.0344307	0.0208395	0.0249863	0.0243129	0.0255231	0.027317	0.026346	0.0284969	0.0337363	0.0298654	0.0328544	0.0301554	0.027979	0.0223083	0.028447	0.0201143	0.0243411	0.0313359	0.0344029	0.0252944	0.0298557	0.0305763	0.0217022	0.0219999	0.0390621	0.0221514	0.0232836	0.025226	0.0259931
TCTG	0.0150834	0.0132338	0.0179317	0.0140292	0.0180779	0.0198262	0.0168374	0.0147186	0.0167705	0.0144653	0.0159204	0.0109201	0.0129081	0.0166914	0.0170496	0.0147746	0.0168758	0.0348396	0.0152982	0.016117	0.0145119	0.0143408	0.0145402	0.0135516	0.0121556	0.0166035	0.0136906	0.0135184	0.020928	0.0180742	0.0189251	0.0185619	0.0249034	0.0100974	0.0210932	0.0152259	0.0115843	0.0199264	0.0220897	0.0141591	0.0211078	0.0195978	0.0142079	0.0152831	0.0250961	0.0174031	0.0136519	0.0187898	0.0194221
TCTC	0.00835452	0.00529652	0.0072051	0.00527732	0.00713078	0.0117557	0.00920806	0.0053758	0.0056066	0.0054942	0.00651686	0.0149905	0.00549514	0.00903644	0.00636806	0.00374045	0.00538951	0.00669076	0.00487815	0.00570347	0.00868605	0.00434597	0.00569576	0.00724467	0.00476916	0.00766505	0.00754215	0.00664362	0.00999265	0.00636957	0.00921682	0.0104732	0.010339	0.00486036	0.0084183	0.00622092	0.00445853	0.00932322	0.0125151	0.00571156	0.00959193	0.00983661	0.00568451	0.00669608	0.0170302	0.00104301	0.00753268	0.0143871	0.0141414
TCTN	0	0	0	0	0	0	0	0	0	0	0	0	0	0	0	0	0	0	0	0	0	0	0	0	0	0	2.15531e-05	0	0	0	0	0	0	0	0	1.41034e-05	0	0	8.66408e-06	0	1.76891e-05	0	0	0	0	0	0	0	0
TCAT	0.00818148	0.0112218	0.0100297	0.013021	0.00996692	0.00676017	0.00962893	0.0104906	0.0119201	0.0111461	0.0293091	0.0142926	0.0139345	0.0083823	0.0107141	0.0126511	0.0123014	0.00860113	0.0109926	0.0107839	0.00892509	0.0105991	0.0106598	0.00975616	0.0138901	0.0120123	0.0122261	0.0117958	0.0169924	0.0101743	0.00903827	0.00629056	0.00708083	0.0249894	0.00864977	0.0104062	0.013224	0.00906301	0.00577811	0.012309	0.00823648	0.00824837	0.00925641	0.0110074	0.00443339	0.00214242	0.00893096	0.0106828	0.00757138
TCAG	0.0113492	0.0143863	0.0170355	0.0182095	0.0147444	0.012591	0.0141618	0.0179019	0.0190848	0.0165006	0.013011	0.0130807	0.016764	0.0157224	0.0146693	0.017573	0.0151287	0.0223005	0.0182343	0.0131201	0.0143827	0.0177213	0.0170736	0.0151658	0.0148507	0.0156144	0.013901	0.0233974	0.0153406	0.0168043	0.0133928	0.0119332	0.0314693	0.014824	0.0146027	0.0133757	0.0167735	0.0150755	0.0115611	0.0145931	0.0139429	0.0132326	0.0131097	0.00904207	0.00937182	0.0284892	0.011529	0.0119841	0.0108907
TCAC	0.0283097	0.0223343	0.0205706	0.0179238	0.0225946	0.0309427	0.0257614	0.0198854	0.0175062	0.0183984	0.0244122	0.0219516	0.0188974	0.0243659	0.0198946	0.0183798	0.0202739	0.0226051	0.0189582	0.0310556	0.0242563	0.01693	0.0192713	0.0232503	0.0191828	0.0230494	0.0239364	0.0228087	0.0279208	0.0213439	0.0290348	0.0322321	0.032885	0.0179696	0.0265732	0.0205716	0.0186551	0.0280022	0.0343501	0.0212055	0.028657	0.0289491	0.0130772	0.019605	0.0376694	0.0191529	0.0266557	0.018036	0.0251542
TCAN	0	0	0	0	0	0	0	0	0	0	0	4.94778e-06	0	0	0	0	0	0	0	0	0	0	0	0	0	0	0	0	0	0	1.14883e-05	2.17964e-05	0	0	9.8356e-06	0	0	1.60141e-05	0	0	0	1.18715e-05	0	0	0	0	0	0	0
TCGT	0.0113383	0.010442	0.00896201	0.00736825	0.021005	0.0124146	0.0106662	0.00954679	0.00762169	0.0105874	0.0110219	0.00883365	0.00808635	0.0106841	0.0198943	0.00995766	0.00917889	0.0111543	0.0081394	0.0113958	0.0112776	0.0077921	0.00850393	0.0106215	0.00952383	0.00943067	0.00871027	0.00908714	0.0101217	0.0180876	0.0212063	0.0131966	0.0127072	0.00751729	0.0106683	0.0107943	0.00843562	0.0107474	0.0160618	0.00937408	0.012435	0.0110075	0.0130549	0.0163564	0.0171741	0.0016778	0.0124725	0.00658332	0.00819817
TCGA	0.000337861	0.000474122	0.00128896	0.00133776	0.000560325	0.000368443	0.000336267	0.0012851	0.000691881	0.00182036	0.000967444	0.000494047	0.000719536	0.000733286	0.000650604	0.00061222	0.00100685	0.00116422	0.00138409	0.000541437	0.0007825	0.000540959	0.00114287	0.00119473	0.00140162	0.000939053	0.00057554	0.00130088	0.000285342	0.000688092	0.0101826	0.000200245	8.65262e-05	0.00105777	0.000445061	0.000328031	0.00116092	0.000636718	0.000283876	0.000995824	0.000328363	0.000518694	0.00374231	0.00617803	0.00175956	0.000716207	0.000343799	0.00224383	0.000356833
TCGG	0.0144331	0.0115551	0.0136813	0.0115364	0.0126242	0.018273	0.0147385	0.0117701	0.0118962	0.0120075	0.0133624	0.0103951	0.0101377	0.0152214	0.0126949	0.00899322	0.0107706	0.0129662	0.0104876	0.0118451	0.0131682	0.0113453	0.013606	0.0128453	0.0128152	0.0146976	0.0136575	0.0161538	0.0177772	0.0143826	0.0189774	0.0185394	0.01716	0.0113529	0.0146327	0.0101309	0.0134724	0.0167357	0.0191007	0.0132526	0.0156172	0.0156089	0.0116117	0.0129324	0.023638	0.0112917	0.0136683	0.0128085	0.0148535
TCGC	0.00675157	0.00558799	0.00401373	0.00629034	0.00483729	0.00412369	0.0165549	0.00494562	0.00479061	0.00513535	0.00554743	0.00862659	0.0253539	0.00502461	0.00526437	0.00516407	0.00567445	0.00484993	0.0235673	0.0274657	0.00737422	0.0231042	0.00384855	0.0269051	0.00784887	0.00721904	0.00826705	0.00638373	0.00293269	0.0035311	0.00577857	0.00460524	0.00723581	0.00663824	0.00415215	0.0041277	0.00675594	0.0040777	0.00314081	0.00560699	0.0040946	0.00362159	0.00467241	0.00249225	0.00202195	0.017173	0.00892029	0.00944436	0.00504784
TCGN	0	0	0	0	0	0	0	0	0	0	0	0	0	0	0	0	0	0	0	0	0	0	0	0	6.82012e-06	0	2.29347e-05	0	0	0	9.57359e-06	0	0	0	7.61313e-06	0	0	0	9.50643e-06	1.56779e-05	1.79022e-05	0	0	0	0	0	0	0	0
TCCT	0.0108206	0.0355823	0.0132448	0.0155784	0.0134748	0.0174698	0.0117948	0.0153957	0.0150328	0.0170736	0.0157345	0.0154928	0.0170826	0.010507	0.0153586	0.0162297	0.0250715	0.0142396	0.0154241	0.0153857	0.0144766	0.016384	0.0153932	0.0141829	0.0143402	0.012539	0.0141799	0.0129523	0.0118769	0.0158393	0.00847739	0.00955293	0.00938143	0.021021	0.0149685	0.0181275	0.0244461	0.0112948	0.0188754	0.0156166	0.0123935	0.0125318	0.0184039	0.0255741	0.00743866	0.019618	0.0152925	0.00686887	0.0107538
TCCG	0.0134148	0.0121922	0.0109762	0.0105277	0.0135087	0.0146845	0.0121072	0.01123	0.0103597	0.010345	0.0131932	0.0123228	0.0110074	0.01166	0.0126867	0.0134532	0.0130581	0.0134246	0.0115267	0.0135725	0.0118312	0.0100298	0.0093968	0.011484	0.0123698	0.0123915	0.0136075	0.0126517	0.0160331	0.0144264	0.0147305	0.015498	0.0133158	0.0129404	0.0151835	0.0174623	0.0115065	0.0151631	0.0157141	0.0143385	0.0155213	0.0150794	0.00721132	0.00780697	0.0146818	0.0110395	0.0160591	0.00798773	0.0121715
TCCC	0.0285261	0.0286293	0.0292094	0.0273853	0.0277368	0.0287674	0.0282904	0.0276111	0.028938	0.0273636	0.0269652	0.0283018	0.0272768	0.0288027	0.028252	0.0285807	0.0279327	0.0276693	0.0277803	0.0280459	0.0272345	0.0286242	0.0299748	0.0278207	0.0297065	0.0299206	0.0303226	0.0279118	0.0273585	0.027478	0.0293915	0.0297946	0.0312734	0.0252935	0.0285536	0.0294304	0.02943	0.0281835	0.0293504	0.0273055	0.029096	0.0274546	0.03459	0.0334713	0.0329561	0.0303588	0.0311634	0.0384032	0.0375546
TCCN	0	0	0	0	0	0	0	0	0	0	3.40943e-06	0	0	0	0	0	0	0	0	0	0	1.09826e-05	0	0	0	5.30604e-06	0	0	1.85711e-05	3.58284e-05	1.20627e-05	0	0	1.42572e-05	3.52258e-05	2.30833e-05	0	0	2.29617e-05	0	0	1.06219e-05	0	0	0	0	0	0	0
TCNT	0	0	0	0	0	0	0	0	0	0	0	0	0	0	0	0	0	0	0	0	0	0	0	0	9.57882e-06	0	0	0	2.03649e-05	0	0	1.20171e-05	0	0	0	0	1.16753e-05	0	0	2.75122e-05	1.79022e-05	0	0	0	0	0	0	0	0
TCNA	0	0	0	0	0	0	0	0	0	0	0	0	0	0	0	0	0	0	0	0	0	0	0	0	0	0	0	0	0	0	0	1.20171e-05	0	0	0	0	0	0	0	0	1.76891e-05	0	0	0	0	0	0	0	0
TCNG	0	0	6.74764e-06	6.19636e-06	1.92252e-05	0	1.33998e-05	0	0	0	1.04439e-05	0	0	0	0	0	0	0	0	0	0	1.09826e-05	0	0	3.66236e-05	2.67479e-05	2.51959e-05	5.57315e-05	0	3.57334e-05	2.70693e-05	0	0	2.99043e-05	3.53104e-05	0	9.24492e-06	7.31503e-05	2.06371e-05	6.25972e-05	2.14568e-05	2.93066e-05	0	0	0	0	0	0	0
TCNC	0	0	6.74764e-06	0	0	0	1.33998e-05	0	0	0	1.00476e-05	0	0	0	0	0	1.79379e-05	0	0	0	0	0	0	0	0	0	6.99274e-05	0	0	0	0	0	0	1.47488e-05	9.95932e-06	1.14943e-05	0	3.61194e-05	2.2068e-05	0	0	0	0	0	0	0	0	0	0
TCNN	0	0	0	0	0	0	0	0	0	0	0	0	0	0	0	0	0	0	0	0	0	0	0	0	0	0	0	0	0	0	0	0	0	0	0	0	0	0	0	0	0	0	0	0	0	0	0	0	0
TNTT	0	0	7.58653e-06	0	0	0	0	0	0	0	1.86137e-06	0	1.25031e-05	0	0	0	0	0	0	0	0	0	0	0	0	5.58636e-06	3.91094e-05	4.92715e-05	0	0	0	9.68199e-06	1.07814e-05	2.40218e-05	0	0	3.07663e-05	3.29045e-05	1.85838e-05	2.22104e-05	3.12891e-05	0	0	0	0	0	0	0	0
TNTG	0	0	0	0	0	0	0	4.76302e-06	0	0	0	0	0	0	0	0	0	0	0	0	0	0	0	0	0	0	0	0	0	0	1.14883e-05	1.21601e-05	1.08251e-05	1.1834e-05	9.8356e-06	0	2.00954e-05	1.60141e-05	3.57491e-05	0	2.30456e-05	2.02457e-05	0	0	0	0	0	0	0
TNTC	6.54328e-06	0	0	0	0	0	0	0	0	0	0	0	0	0	0	0	0	0	0	0	0	0	0	8.99281e-06	0	0	2.12965e-05	0	0	0	0.000143292	1.20171e-05	1.37825e-05	0	4.57736e-05	0	0	2.87787e-05	0	0	1.72777e-05	0	0	0	0	0	0	0	0
TNTN	0	0	0	0	0	0	0	0	0	0	0	0	0	0	0	0	0	0	0	0	0	0	0	0	0	0	0	0	0	0	0	0	0	0	0	0	0	0	0	0	0	0	0	0	0	0	0	0	0
TNAT	0	0	0	0	0	0	0	0	0	0	0	0	0	0	0	0	0	0	0	0	0	1.07683e-05	0	0	0	0	6.97197e-05	0	0	1.61134e-05	0	0	0	0	8.16253e-06	8.87587e-06	0	0	0	0	0	0	0	0	0	0	0	0	0
TNAG	0	0	0	0	0	0	0	0	0	0	0	0	0	0	0	0	0	0	0	0	0	1.07683e-05	0	0	0	0	1.68765e-05	0	0	0	0	0	0	0	8.16253e-06	1.41034e-05	0	0	0	0	0	0	0	0	0	0	0	0	0
TNAC	0	0	0	0	0	0	0	0	0	0	0	0	0	0	0	0	0	0	0	0	0	0	0	0	0	0	1.89303e-05	0	0	1.61134e-05	1.21846e-05	0	0	0	0	8.87587e-06	0	0	0	3.13558e-05	0	0	0	0	0	0	0	0	0
TNAN	0	0	0	0	0	0	0	0	0	0	0	0	0	0	0	0	0	0	0	0	0	0	0	0	0	0	0	0	0	0	0	0	0	0	0	0	0	0	0	0	0	0	0	0	0	0	0	0	0
TNGT	0	0	0	0	0	0	0	0	0	0	0	0	0	0	0	0	0	0	0	0	0	0	0	0	0	0	0	0	0	0	0	0	0	0	0	0	0	0	0	1.6153e-05	0	0	0	0	0	0	0	0	0
TNGG	0	0	0	0	0	0	0	0	0	0	0	0	0	0	0	0	0	0	0	0	1.60006e-05	0	0	0	0	0	0	0	0	0	0	0	1.06526e-05	0	6.18567e-06	0	0	1.09794e-05	0	3.21245e-05	1.16085e-05	0	0	0	0	0	0	0	0
TNGC	0	0	0	0	0	0	0	0	0	0	0	0	0	0	0	0	0	0	0	0	0	0	0	0	0	0	0	0	0	0	0	0	0	0	0	1.05938e-05	0	0	0	0	0	0	0	0	0	0	0	0	0
TNGN	0	0	0	0	0	0	0	0	0	0	0	0	0	0	0	0	0	0	0	0	0	0	0	0	0	0	0	0	0	0	0	0	0	0	0	0	0	0	0	0	0	0	0	0	0	0	0	0	0
TNCT	0	0	0	0	0	0	0	0	0	0	0	0	0	0	0	0	0	0	0	0	0	0	0	0	0	0	0	1.97426e-05	1.79211e-05	0	0	2.65312e-05	1.3369e-05	0	1.98579e-05	1.78568e-05	0	0	0	1.62763e-05	0	0	0	0	0	0	0	0	0
TNCG	0	0	0	0	0	0	0	0	0	0	0	0	0	0	0	0	0	0	0	0	0	0	0	0	0	0	1.78001e-05	0	1.48723e-05	0	0	0	0	0	0	0	0	0	1.20788e-05	0	5.37184e-05	0	0	0	0	0	0	0	0
TNCC	0	0	0	0	0	0	0	0	0	0	0	0	0	0	0	0	0	0	0	0	0	0	0	0	0	0	0	0	0	0	0	0	0	0	1.802e-05	0	0	0	0	0	1.1654e-05	0	0	0	0	0	0	0	0
TNCN	0	0	0	0	0	0	0	0	0	0	0	0	0	0	0	0	0	0	0	0	0	0	0	0	0	0	0	0	0	0	0	0	0	0	0	0	0	0	0	0	0	0	0	0	0	0	0	0	0
TNNT	0	0	0	0	0	0	0	0	0	0	0	0	0	0	0	0	0	0	0	0	0	0	0	0	0	0	0	0	0	0	0	9.63633e-06	0	0	8.89624e-06	0	0	0	0	0	0	0	0	0	0	0	0	0	0
TNNA	0	0	0	0	0	0	0	0	0	0	0	0	0	0	0	0	0	0	0	0	0	0	0	0	0	0	2.15531e-05	0	0	0	0	0	0	0	0	0	0	0	0	0	0	0	0	0	0	0	0	0	0
TNNG	0	0	0	0	0	0	0	0	0	0	0	0	0	0	0	0	0	0	0	0	0	0	0	0	0	0	0	0	0	0	0	0	0	0	0	0	0	0	0	0	0	0	0	0	0	0	0	0	0
TNNC	0	0	0	0	0	0	0	0	0	0	0	0	0	0	0	0	0	0	0	0	0	0	0	0	0	0	0	0	0	0	0	0	0	0	0	0	0	0	0	0	0	0	0	0	0	0	0	0	0
TNNN	0	0	6.15574e-06	0	0	0	0	0	0	3.02641e-06	0	0	0	0	0	0	0	0	0	0	0	0	0	0	0	0	0	0	0	0	1.07224e-05	0	0	0	0	0	0	0	0	0	0	0	0	0	0	0	0	0	0
ATTT	0.00362788	0.0152583	0.00778656	0.00705499	0.00683315	0.00388217	0.00498794	0.00715713	0.00813651	0.0191	0.00698252	0.00546986	0.00611831	0.00590342	0.0080825	0.00631388	0.00789585	0.00773724	0.00838093	0.00724786	0.00560166	0.018737	0.0181831	0.0069058	0.0257491	0.00656633	0.00487472	0.00483512	0.00482431	0.00656493	0.00500513	0.00448299	0.00256789	0.00554006	0.00514889	0.00703784	0.00583429	0.00637384	0.00444374	0.00599298	0.0143274	0.00592452	0.0146216	0.0186612	0.00668972	0.000533403	0.00264037	0.00864425	0.00775326
ATTG	0.0386226	0.0218398	0.0202555	0.0211489	0.0225832	0.0170742	0.0198726	0.0204744	0.0302824	0.0232901	0.0217231	0.0195896	0.0397201	0.0193858	0.0217182	0.0234994	0.0229587	0.0217726	0.0216908	0.0247045	0.0236497	0.0200879	0.0202571	0.0239895	0.0256158	0.0216316	0.0222735	0.0233313	0.0185514	0.0210777	0.0207942	0.0182173	0.0200428	0.0241924	0.0211678	0.0229129	0.0235747	0.0187892	0.0171961	0.0231022	0.0280885	0.0201911	0.027327	0.0264734	0.019465	0.0213089	0.0227498	0.0283914	0.0237043
ATTC	0.0183273	0.0334306	0.0198916	0.0232665	0.0221703	0.035646	0.0191948	0.0220008	0.0224813	0.0234203	0.0217997	0.0225524	0.0232022	0.0187164	0.0225126	0.0353706	0.0242766	0.0213927	0.023363	0.0227063	0.0213568	0.0417053	0.0214877	0.0219858	0.0231305	0.0217217	0.0219341	0.0220222	0.019166	0.022717	0.0188683	0.0183604	0.0182058	0.0270222	0.0206843	0.0252063	0.02356	0.0200735	0.0173491	0.0237991	0.0202277	0.0192941	0.0182536	0.0168026	0.0121448	0.0120833	0.0235398	0.0155077	0.0177846
ATTN	0	0	0	0	0	0	0	4.76302e-06	0	0	0	0	0	0	0	0	0	0	0	0	0	0	0	0	0	5.40286e-06	0	1.97426e-05	1.48723e-05	0	0	0	0	0	0	0	0	0	1.20788e-05	0	0	0	0	0	0	0	0	0	0
ATAT	0.0055696	0.00663758	0.00529072	0.00690189	0.00632421	0.00446687	0.00563412	0.00653399	0.00599219	0.0061418	0.015205	0.00709721	0.00694069	0.0147432	0.00607012	0.00719963	0.00747288	0.00441166	0.00726651	0.00687817	0.00694143	0.00586001	0.00506859	0.0169597	0.00875464	0.00669149	0.00781791	0.00824167	0.00534977	0.00653899	0.00582968	0.00435194	0.00516895	0.00957764	0.0153827	0.00787043	0.00938747	0.00496378	0.00359638	0.00759131	0.00491296	0.00554102	0.00447501	0.00317264	0.00210674	0.0151239	0.00574533	0.00920752	0.00674046
ATAG	0.00552148	0.00794728	0.00421844	0.00449545	0.00589424	0.0037152	0.00371632	0.00599855	0.00452043	0.004422	0.00593024	0.00710417	0.00521341	0.00632293	0.0067629	0.00697175	0.00678108	0.00848852	0.0256776	0.00639024	0.0150945	0.00703089	0.00392563	0.00542224	0.00433774	0.00634966	0.00637098	0.00400855	0.00340448	0.00593732	0.00360849	0.00599727	0.00589438	0.0043601	0.00558441	0.00893245	0.00452103	0.00470054	0.00515974	0.00516901	0.00498911	0.00666093	0.00336257	0.0017701	0.000886295	0.00132977	0.00829343	0.00118551	0.00582282
ATAC	0.00900654	0.0193609	0.0281086	0.00819622	0.0283016	0.00880263	0.00995964	0.00843802	0.0196474	0.0185664	0.00981766	0.00911835	0.00782372	0.00812882	0.00967029	0.0181971	0.0100239	0.0090446	0.00907783	0.00909128	0.00962204	0.0110651	0.0204682	0.00989051	0.015525	0.0096409	0.0105033	0.00615535	0.0103367	0.00965232	0.00738741	0.0100273	0.00923595	0.00619208	0.0109909	0.0133534	0.00577856	0.0105076	0.0111812	0.00622756	0.0191243	0.0102518	0.0100881	0.010018	0.00981346	0.00357813	0.00970318	0.00566737	0.00912711
ATAN	0	0	0	0	0	0	0	0	0	0	0	0	0	0	0	0	0	0	0	0	0	0	0	0	0	0	0	0	0	0	0	0	0	0	0	0	0	1.42786e-05	0	0	1.53184e-05	0	0	0	0	0	0	0	0
ATGT	0.0206206	0.00362666	0.0421147	0.0043118	0.0224057	0.0210155	0.00315272	0.00331827	0.0235347	0.0233448	0.0225921	0.00254922	0.00317566	0.00306992	0.00385013	0.00312649	0.00470544	0.00261028	0.00460314	0.00244657	0.00346798	0.0037395	0.00383198	0.00358737	0.00286666	0.00375252	0.00405309	0.00281583	0.0128645	0.00450837	0.00192804	0.00192621	0.00197	0.00348172	0.00431128	0.00329798	0.00290687	0.00352106	0.00184211	0.00355	0.00381882	0.00437097	0.000593517	0.00204694	0.0011865	0.000632436	0.00127409	0.00133028	0.00166271
ATGG	0.018234	0.01856	0.0141824	0.0163647	0.0161233	0.0236713	0.0151666	0.0172509	0.0164145	0.016362	0.0171669	0.0198205	0.0165652	0.0351295	0.0161742	0.0170435	0.0258711	0.016716	0.0165664	0.015938	0.016759	0.0200587	0.0160671	0.0174306	0.0175065	0.0260393	0.017021	0.0184274	0.0144882	0.0157431	0.0142999	0.0165292	0.0174988	0.0212308	0.0146863	0.0224004	0.0181257	0.0155662	0.0244483	0.0270859	0.0141122	0.0151957	0.0166007	0.0140536	0.0119866	0.0203896	0.022231	0.0131944	0.0190922
ATGC	0.0024843	0.00436208	0.00651794	0.00745771	0.00468162	0.00518592	0.00710156	0.0052485	0.0362958	0.00620566	0.00543573	0.00415897	0.00729828	0.00532056	0.00539233	0.00483663	0.00612557	0.00515388	0.00746021	0.00442073	0.00546409	0.00683078	0.00779396	0.00578521	0.00814997	0.00722247	0.00843396	0.0109642	0.0073425	0.00836847	0.00562755	0.00375295	0.00381587	0.0100545	0.00552588	0.014564	0.00944628	0.00655349	0.00455496	0.00971445	0.00561841	0.00784923	0.00537358	0.00368568	0.00245672	0.0187648	0.00378591	0.00931966	0.0044454
ATGN	0	0	0	0	0	0	0	0	0	0	0	0	0	0	0	0	0	0	0	0	0	0	0	0	0	6.46456e-06	0	0	0	0	0	0	0	0	0	0	0	1.81159e-05	0	0	0	0	0	0	0	0	0	0	0
ATCT	0.00770537	0.00460171	0.0065813	0.00570806	0.00632921	0.011032	0.0082807	0.00489679	0.00528545	0.00372446	0.00632318	0.0158797	0.00529304	0.00729319	0.00537737	0.0139025	0.00536164	0.00594886	0.0139984	0.00552442	0.0056091	0.00438856	0.00459398	0.00494121	0.00375906	0.00704193	0.00704258	0.00466053	0.00932212	0.00558214	0.00871659	0.0193282	0.0182965	0.00363634	0.00766391	0.00542644	0.00327603	0.00943908	0.0124483	0.00497007	0.00941293	0.00962858	0.00339514	0.00521651	0.0146588	0.00719884	0.00767908	0.00373542	0.00643704
ATCG	0.00451283	0.00476001	0.00459906	0.0051578	0.0146485	0.00619594	0.0161984	0.0047366	0.00429363	0.0051055	0.00511319	0.00360819	0.023653	0.00468315	0.0141096	0.00545193	0.00585271	0.00387566	0.0237959	0.00581648	0.00568626	0.00266291	0.00435969	0.0252841	0.00633292	0.00591914	0.00702248	0.00662677	0.00600536	0.0142475	0.0356041	0.00644115	0.00581577	0.00551042	0.0235345	0.00435598	0.00541997	0.00591688	0.00641038	0.00627501	0.00547871	0.00468605	0.00124921	0.00381546	0.00693501	0.00239065	0.00536019	0.0035123	0.00400017
ATCC	0.0216076	0.0122649	0.0107035	0.0105395	0.0105865	0.0105026	0.0119432	0.0109167	0.0116338	0.012676	0.0127195	0.0108111	0.0105131	0.011002	0.0107632	0.0102446	0.0112699	0.0112307	0.0111172	0.0121498	0.0115604	0.011508	0.0122167	0.0117331	0.0135333	0.0105882	0.0119446	0.0114531	0.00916071	0.00940012	0.0124565	0.0107227	0.0113462	0.0132532	0.0116632	0.0125684	0.02176	0.0114135	0.0110944	0.0124041	0.0111035	0.0202459	0.0206204	0.0221822	0.0140565	0.00410461	0.0135741	0.0125579	0.0132495
ATCN	0	0	0	0	0	0	0	0	0	0	7.26177e-06	0	0	0	0	0	0	0	0	0	0	0	0	0	0	0	0	2.15959e-05	2.03649e-05	0	0	0	0	0	8.9465e-06	0	0	0	0	0	0	0	0	0	0	0	0	0	0
ATNT	6.54328e-06	0	7.58653e-06	0	0	0	0	0	0	0	0	0	1.25031e-05	0	0	0	0	0	0	0	0	0	0	8.99281e-06	0	5.58636e-06	1.35012e-05	2.21381e-05	3.33481e-05	0	0	0	1.37825e-05	2.40218e-05	0	0	1.75977e-05	1.07753e-05	3.57491e-05	2.22104e-05	4.66074e-05	1.18715e-05	0	0	0	0	0	0	0
ATNG	0	0	0	0	0	0	0	0	0	0	0	0	0	0	0	0	0	0	0	0	0	0	0	0	0	0	0	0	0	0	0	0	0	0	0	0	0	0	0	1.6153e-05	0	0	0	0	0	0	0	0	0
ATNC	0	0	0	0	0	0	0	0	0	0	0	0	0	0	0	0	0	0	0	0	0	0	0	0	0	0	0	0	0	0	0	0	1.06103e-05	0	0	0	0	0	0	0	1.75844e-05	0	0	0	0	0	0	0	0
ATNN	0	0	0	0	0	0	0	0	0	0	0	0	0	0	0	0	0	0	0	0	0	0	0	0	0	0	0	0	0	0	0	9.63633e-06	0	0	0	0	0	0	0	0	0	0	0	0	0	0	0	0	0
AATT	0.00399615	0.0149413	0.0150425	0.00515565	0.0056376	0.00214481	0.00310719	0.00630824	0.0159388	0.0174275	0.00531518	0.00441043	0.00580169	0.00456136	0.00607854	0.0170296	0.00542217	0.00555193	0.00656295	0.00530965	0.00513072	0.026099	0.0164815	0.00534134	0.0143534	0.00395208	0.00328803	0.00330016	0.00364614	0.00595347	0.00289955	0.00275794	0.00233712	0.0050418	0.00460429	0.00700997	0.00425546	0.00376518	0.00257264	0.00436038	0.0132728	0.00377595	0.0106428	0.0133941	0.00449729	0.000458679	0.00495091	0.0073889	0.00784204
AATG	0.0308066	0.014527	0.015677	0.0162983	0.0159018	0.0426302	0.0139629	0.0145172	0.0155465	0.0367336	0.0142091	0.0137214	0.0151608	0.0235008	0.0155661	0.0160208	0.0266594	0.0151151	0.0152246	0.0168716	0.0142339	0.0144587	0.0145808	0.0155028	0.0170114	0.0263349	0.0145875	0.0166977	0.0151079	0.0159937	0.0150363	0.0137945	0.0121517	0.02757	0.0134583	0.0238769	0.0168457	0.0149823	0.022903	0.0263898	0.0139968	0.0145197	0.0160344	0.0188314	0.0137921	0.0106024	0.0119385	0.0140558	0.0118992
AATC	0.0194867	0.00825571	0.00790369	0.00679132	0.0181098	0.00905114	0.0178154	0.00745577	0.00563709	0.00744141	0.0203341	0.0184203	0.0350198	0.00910459	0.018	0.00697393	0.00818814	0.0215255	0.0163682	0.0202209	0.00850612	0.00634077	0.00644915	0.0184318	0.00652678	0.00788295	0.00797406	0.01629	0.0171917	0.0167703	0.0187225	0.0204628	0.0212199	0.0058413	0.0177558	0.00634564	0.015022	0.00915948	0.0110415	0.00768568	0.00976758	0.0191117	0.0104263	0.00931458	0.0103004	0.0025935	0.0116633	0.00356634	0.00464315
AATN	6.54328e-06	0	7.58653e-06	0	0	0	0	0	0	0	0	0	1.25031e-05	0	0	0	0	0	0	0	0	0	0	0	0	5.58636e-06	3.04577e-05	2.21381e-05	0	0	0	0	1.37825e-05	1.2372e-05	0	0	1.75977e-05	0	1.18011e-05	2.22104e-05	0	1.18715e-05	0	0	0	0	0	0	0
AAAG	0.0249025	0.0240819	0.0258232	0.0257717	0.0261057	0.0236521	0.0220487	0.0350975	0.025005	0.0249342	0.0244684	0.024143	0.0250915	0.0250065	0.0251481	0.0266597	0.0248198	0.0255275	0.0247683	0.0236023	0.0233444	0.0254012	0.0256303	0.0228336	0.0232158	0.0237069	0.0200592	0.022724	0.0253792	0.026439	0.0258811	0.0256503	0.0253939	0.0216785	0.0269597	0.0229875	0.023228	0.034687	0.0275801	0.0227641	0.0282188	0.0245033	0.029889	0.03083	0.0283034	0.0293181	0.0281636	0.017882	0.0222759
AAAC	0.0108232	0.00921338	0.0078306	0.0184667	0.00939406	0.00951342	0.00941085	0.00860264	0.00825255	0.00814272	0.00875782	0.00969359	0.00903666	0.00804473	0.00797976	0.00828254	0.00902516	0.00670429	0.00744526	0.0105219	0.010019	0.00875786	0.00749199	0.00978446	0.00961947	0.00948028	0.0104066	0.00937866	0.00966162	0.00846156	0.00968671	0.00984768	0.0109283	0.0108219	0.00944122	0.0106439	0.00900803	0.0093369	0.00902943	0.0104004	0.00866036	0.00932118	0.00555594	0.00550261	0.00898494	0.00854828	0.0109261	0.0115076	0.0107011
AAAN	0	0	0	0	0	0	0	0	0	2.99731e-06	0	0	0	0	0	0	0	0	0	0	0	0	0	0	0	0	1.25979e-05	2.71334e-05	0	0	1.21233e-05	0	0	1.94416e-05	2.10396e-05	0	0	2.56445e-05	0	0	1.06135e-05	0	0	0	0	0	0	0	0
AAGT	0.0166981	0.0173508	0.0152526	0.0165313	0.0178861	0.0163155	0.0166379	0.0164234	0.0169468	0.0181273	0.0178026	0.0141709	0.0148037	0.0145506	0.0154952	0.0181922	0.0177116	0.0152529	0.0177214	0.0156723	0.0180069	0.017399	0.0160914	0.01811	0.0146625	0.0158362	0.016006	0.0139114	0.0176771	0.0167368	0.0159851	0.0177704	0.0168861	0.0151339	0.0180835	0.0203298	0.0131841	0.0178854	0.0176195	0.0157838	0.0180219	0.0168614	0.0199016	0.020722	0.0185555	0.0116797	0.0162732	0.00842547	0.0161719
AAGG	0.0175237	0.016877	0.0207008	0.0210618	0.0182308	0.0177711	0.0168067	0.0398476	0.0218076	0.0188144	0.0172693	0.0189949	0.0220577	0.0196036	0.0182707	0.0206498	0.0160879	0.0188463	0.020324	0.0164342	0.0158763	0.021778	0.0215661	0.0154116	0.0193612	0.0188275	0.017192	0.0220381	0.0221677	0.0233837	0.0197209	0.0182459	0.0178368	0.0202051	0.0191684	0.0170715	0.0396168	0.0384649	0.0184826	0.0190117	0.020553	0.0204461	0.0205813	0.0173983	0.0190079	0.0308897	0.0197255	0.0145952	0.0159881
AAGC	0.0158076	0.0153917	0.0141291	0.0144941	0.0126962	0.0130543	0.0144894	0.0150538	0.0143469	0.0136262	0.013222	0.0178804	0.0167277	0.0155353	0.01423	0.0140892	0.0144572	0.0150201	0.01416	0.0157112	0.0144177	0.0135208	0.0128695	0.0142758	0.019932	0.016244	0.016694	0.0168698	0.0123006	0.0128556	0.0169884	0.0146299	0.0160922	0.0182623	0.0141318	0.0133972	0.0196516	0.0138073	0.0128748	0.0171737	0.0135598	0.0124827	0.0154888	0.0080933	0.0107707	0.0218156	0.01613	0.0222837	0.0143914
AAGN	0	0	0	0	0	0	0	0	0	0	6.97785e-06	0	0	0	0	0	0	0	0	0	0	0	0	0	0	5.30604e-06	0	0	1.85711e-05	3.58284e-05	0	5.30624e-05	0	1.1834e-05	2.55108e-05	1.78568e-05	0	0	2.31819e-05	1.62763e-05	0	8.77462e-06	0	0	0	0	0	0	0
AACT	0.0171903	0.0165457	0.0170495	0.0186903	0.0182551	0.0196741	0.0182817	0.0161902	0.0168056	0.0143651	0.0177281	0.0183227	0.0171883	0.0162332	0.0173398	0.0144376	0.016813	0.0168344	0.0172608	0.0166602	0.0159733	0.0178517	0.016732	0.0159459	0.0172871	0.0186869	0.0190266	0.0201311	0.0214534	0.0204793	0.0185301	0.0204227	0.0183572	0.0167098	0.0201802	0.0197089	0.017319	0.020046	0.020404	0.0187221	0.0203232	0.0219333	0.0131372	0.0101011	0.0167606	0.0119582	0.0186374	0.0150138	0.0179754
AACG	0.00856778	0.00773429	0.00799984	0.00581389	0.00797387	0.0114877	0.00816991	0.00691788	0.00559021	0.00708986	0.00801118	0.00702709	0.00636141	0.00890604	0.00767913	0.00653465	0.00687513	0.00798313	0.00592306	0.00749953	0.00730622	0.00621706	0.026234	0.00676284	0.00643038	0.0077404	0.00756485	0.00784083	0.0106729	0.00786693	0.0104609	0.0119482	0.0105281	0.00546775	0.00856431	0.00676077	0.00559968	0.00980059	0.0127256	0.00631859	0.0102631	0.00997596	0.0078193	0.0107709	0.0158169	0.010097	0.0075193	0.00406885	0.00803768
AACC	0.0170214	0.0151112	0.0139904	0.0320101	0.0130286	0.0131407	0.0131527	0.0146593	0.014562	0.0119409	0.0134917	0.0156133	0.0145069	0.0161964	0.0145398	0.0141567	0.01404	0.0167298	0.0139505	0.0123437	0.0141486	0.0163811	0.0142063	0.0132248	0.01447	0.0148191	0.0148976	0.0141837	0.0154737	0.0168883	0.0134206	0.0155764	0.0160237	0.015296	0.0159208	0.0167895	0.0147526	0.0147781	0.0141341	0.0329656	0.0153445	0.0170045	0.0096762	0.00762069	0.0118412	0.0205549	0.0181763	0.0192921	0.018529
AACN	0	0	6.74764e-06	0	0	0	0	0	0	0	3.27955e-06	0	0	0	0	0	0	0	0	0	0	0	0	0	0	7.40192e-06	0	3.41355e-05	0	0	9.57359e-06	0	0	1.79282e-05	0	0	0	1.02062e-05	1.03185e-05	1.6153e-05	1.76891e-05	8.37412e-06	0	0	0	0	0	0	0
AANT	0	0	0	0	0	0	0	0	0	0	0	0	0	0	0	0	0	0	0	0	0	0	0	0	0	0	0	0	0	0	0	0	0	0	0	0	0	0	0	0	0	0	0	0	0	0	0	0	0
AANG	0	0	0	0	0	0	0	0	0	1.547e-06	0	0	0	0	0	0	0	0	0	0	0	0	0	0	0	0	0	0	0	0	1.20627e-05	7.76768e-06	0	0	2.65905e-05	8.97989e-06	0	0	0	1.55635e-05	0	8.37412e-06	0	0	0	0	0	0	0
AANC	0	0	0	0	0	0	0	0	0	2.99731e-06	0	0	0	0	0	0	0	0	0	0	0	0	0	0	0	0	1.37081e-05	0	0	0	2.17735e-05	0	0	1.94416e-05	1.20422e-05	0	1.17969e-05	1.0856e-05	1.82751e-05	0	1.06135e-05	8.77462e-06	0	0	0	0	0	0	0
AANN	0	0	0	0	0	0	0	0	0	0	0	0	0	0	0	0	0	0	0	0	0	0	0	0	0	0	0	0	0	0	0	0	0	0	0	0	0	0	0	0	1.83442e-05	0	0	0	0	0	0	0	0
AGTG	0.0227394	0.0197074	0.0200667	0.0165508	0.0214283	0.0250174	0.0210246	0.0194211	0.0181277	0.0200665	0.0206636	0.0183282	0.0165575	0.0217962	0.0192377	0.018053	0.0187245	0.0197842	0.0179318	0.0396399	0.0223662	0.0172541	0.0186592	0.0214167	0.0206587	0.0204204	0.0186979	0.0193906	0.0227867	0.0188128	0.0264122	0.0251959	0.0252805	0.0169253	0.0213149	0.018558	0.0183462	0.0226208	0.0259279	0.0190875	0.0223352	0.0211627	0.0227409	0.0279311	0.0346363	0.0202285	0.0200477	0.0169882	0.0198482
AGTC	0.0079811	0.00764777	0.00901048	0.0100584	0.00838496	0.00867294	0.00997546	0.00901387	0.00908228	0.0116068	0.0119036	0.00568225	0.00719737	0.00759917	0.00925125	0.00793565	0.00857254	0.00970255	0.00930029	0.00819495	0.00853952	0.00881418	0.0116308	0.00956623	0.00648161	0.00863959	0.0100515	0.0098629	0.00967174	0.00965538	0.00754554	0.00863579	0.00909119	0.0269217	0.00977211	0.00875092	0.007977	0.0101529	0.00951028	0.0084648	0.0103161	0.00950079	0.0149635	0.0223207	0.0125519	0.00420747	0.00912117	0.00503743	0.00656013
AGTN	0	0	0	0	0	0	0	0	0	0	0	0	0	0	0	0	0	0	0	0	0	0	0	0	0	0	0	0	0	0	1.21846e-05	1.21601e-05	0	0	9.8356e-06	1.05938e-05	0	1.60141e-05	0	0	0	0	0	0	0	0	0	0	0
AGAG	0.0146605	0.00953494	0.0123768	0.0103529	0.0122952	0.0191936	0.0159882	0.00968034	0.00929608	0.00938056	0.0131672	0.0293232	0.0104161	0.0143308	0.0122298	0.00662369	0.0099891	0.0117647	0.00831015	0.0113901	0.0333583	0.00726274	0.0108674	0.0120315	0.00860066	0.0132037	0.0157704	0.0107469	0.0176233	0.0132048	0.0152822	0.0171264	0.0181242	0.00744784	0.0180711	0.00988827	0.00786732	0.015639	0.0202866	0.0101273	0.016743	0.0167561	0.0124592	0.0164461	0.0267688	0.002873	0.0146627	0.0247401	0.0214063
AGAC	0.00593851	0.00600599	0.00959532	0.0092591	0.00912619	0.00850559	0.00936017	0.00801601	0.0102552	0.00885389	0.00828836	0.00577531	0.00766113	0.00707462	0.0090638	0.00910902	0.00868314	0.0271192	0.00907599	0.00768648	0.00728407	0.0079112	0.00842647	0.00712707	0.00690367	0.0083411	0.00803296	0.00838567	0.00936266	0.00949458	0.00750791	0.007819	0.00584117	0.0169344	0.00873057	0.00864461	0.00750391	0.009671	0.00938863	0.00884529	0.0102284	0.00880515	0.00973626	0.0108599	0.00886185	0.00182732	0.00684646	0.00403883	0.00653822
AGAN	0	0	0	0	0	0	0	0	0	0	0	0	0	0	0	0	0	0	0	0	0	0	0	0	0	0	0	0	0	0	0	0	0	0	0	0	0	0	0	0	0	7.88345e-06	0	0	0	0	0	0	0
AGGT	0.00970664	0.00772809	0.00912308	0.0265414	0.00753984	0.00872248	0.00823732	0.0276176	0.00849158	0.00702726	0.00680359	0.00771237	0.00855841	0.00928075	0.00849933	0.00777695	0.00690099	0.00831526	0.00739775	0.00728774	0.00800742	0.00905502	0.00904903	0.0083827	0.00898879	0.0090807	0.00897184	0.00925037	0.0101414	0.00996744	0.00991217	0.00955717	0.00933719	0.00818903	0.00962254	0.00920216	0.0181597	0.00943069	0.00873282	0.0161018	0.00895173	0.00915356	0.0138123	0.0117099	0.0119795	0.0110295	0.00975679	0.0176004	0.0143469
AGGG	0.0176084	0.0167857	0.0171483	0.0135539	0.0138566	0.0166879	0.0158799	0.0148661	0.0168993	0.0137461	0.0133739	0.0144168	0.0146566	0.0166371	0.0149887	0.014396	0.0130046	0.0155343	0.0140497	0.0120437	0.0136006	0.0177102	0.0162517	0.0129922	0.0125551	0.0247771	0.0160717	0.012125	0.0159074	0.0131934	0.0144571	0.0185598	0.0178832	0.0126813	0.015908	0.0176797	0.0126606	0.0166948	0.0180375	0.0124158	0.0172641	0.0156054	0.0192024	0.020361	0.0208803	0.0102881	0.0170968	0.0186881	0.0237056
AGGC	0.0194143	0.0192688	0.0217889	0.0234643	0.0197091	0.0168618	0.0183287	0.0223918	0.0208637	0.0225181	0.019536	0.0241646	0.0237402	0.0218029	0.0209322	0.0216814	0.0181709	0.021785	0.0223693	0.0195052	0.0198859	0.0241295	0.0241254	0.0203034	0.0239626	0.0220099	0.0199687	0.0242196	0.0189577	0.0229295	0.0193623	0.0174463	0.019598	0.023911	0.0168137	0.0178308	0.0238887	0.0181183	0.0156628	0.0216974	0.0165081	0.0180921	0.0304932	0.0276837	0.0187999	0.0323518	0.0234298	0.0293759	0.0211745
AGGN	0	0	0	0	0	0	0	8.31677e-06	0	2.99731e-06	0	4.94778e-06	0	0	0	0	0	0	0	0	0	0	0	0	0	0	3.01958e-05	0	1.80112e-05	0	2.03726e-05	0	0	1.94416e-05	1.20422e-05	0	0	3.90656e-05	7.69059e-06	1.80695e-05	1.06135e-05	7.88345e-06	0	0	0	0	0	0	0
AGCT	0.00561852	0.00525211	0.0036698	0.00316573	0.0039047	0.0060019	0.00412881	0.00509273	0.00270895	0.00400103	0.00450301	0.00394324	0.00297555	0.00553568	0.00361542	0.00370615	0.00332609	0.00484232	0.00326704	0.00473212	0.00561494	0.0029822	0.00252811	0.00509598	0.00332979	0.00458048	0.0047581	0.00318999	0.00429062	0.00314181	0.00576559	0.00715318	0.00715067	0.00235533	0.00421012	0.0122149	0.00319927	0.00492887	0.00641019	0.00290093	0.00480731	0.00429327	0.00271191	0.00296095	0.00692958	0.00818927	0.00502109	0.00274157	0.00396926
AGCG	0.00721385	0.00503164	0.00396316	0.00428838	0.00453592	0.00340395	0.00370971	0.00457134	0.00409668	0.00422369	0.00438196	0.0061975	0.00504981	0.00481465	0.00400087	0.00573271	0.00518831	0.00292916	0.00453989	0.00511273	0.0250899	0.00525209	0.00287554	0.00569132	0.00537518	0.00603734	0.00488782	0.00553614	0.00377425	0.00365189	0.00454749	0.00441085	0.00611831	0.00547683	0.00502794	0.00717596	0.00603939	0.00395629	0.00335012	0.00483357	0.00401078	0.0049093	0.00428658	0.00304216	0.00323289	0.00953333	0.00904871	0.0148167	0.0100854
AGCC	0.028367	0.0309704	0.0293891	0.0321803	0.0287643	0.0276755	0.0305507	0.0305231	0.0299939	0.0297455	0.0286623	0.032816	0.0333143	0.0291033	0.0293225	0.0321751	0.0302687	0.02955	0.0318935	0.0299899	0.0294823	0.0305228	0.0317242	0.0298376	0.0322986	0.0320579	0.0352092	0.0314456	0.0284206	0.0311828	0.0282421	0.0284318	0.0300976	0.0334979	0.0296421	0.0304053	0.0330422	0.0297256	0.0272888	0.0321177	0.0297935	0.0292732	0.0298488	0.0235502	0.0223856	0.0386645	0.0336775	0.032771	0.02968
AGCN	2.63675e-05	1.27465e-05	0	0	0	1.07076e-05	0	1.55086e-05	0	0	1.00476e-05	4.48008e-06	0	0	0	0	0	0	0	0	1.50006e-05	0	0	0	0	0	0	0	0	0	9.57359e-06	8.76782e-06	0	0	8.99734e-06	0	0	0	9.50643e-06	0	0	0	0	0	0	0	0	0	0
AGNT	0	0	0	0	0	0	0	0	0	0	0	0	0	0	0	0	0	0	0	0	0	0	0	0	0	0	0	0	1.70678e-05	0	0	2.65312e-05	0	1.1834e-05	0	0	0	0	2.31819e-05	0	0	8.77462e-06	0	0	0	0	0	0	0
AGNG	0	0	0	0	0	5.35378e-06	0	0	0	0	6.97785e-06	0	0	0	0	0	0	0	0	0	0	0	0	0	0	5.30604e-06	3.61433e-05	0	4.0696e-05	3.58284e-05	0	0	0	1.47488e-05	3.15549e-05	0	0	1.45656e-05	1.18011e-05	0	2.97923e-05	2.20131e-05	0	0	0	0	0	0	0
AGNC	0	0	0	0	0	0	0	0	0	0	0	0	0	0	0	0	0	0	0	0	0	0	0	0	0	0	0	0	0	0	0	0	0	0	0	0	0	0	0	0	0	0	0	0	0	0	0	0	0
AGNN	0	0	0	0	0	0	0	0	0	0	0	0	0	0	0	0	0	0	0	0	0	0	0	0	0	0	0	0	1.7484e-05	0	0	0	0	0	0	0	0	0	0	0	0	0	0	0	0	0	0	0	0
ACTG	0.0178725	0.0167523	0.0154478	0.0156367	0.0162506	0.0176396	0.0169435	0.0161339	0.0160919	0.0151123	0.016858	0.0160703	0.0162329	0.015674	0.0158525	0.0161573	0.0176814	0.0162837	0.016591	0.0164767	0.0164101	0.0150489	0.0155553	0.0158373	0.0171914	0.0160009	0.0165657	0.0349629	0.0171633	0.0156058	0.0176569	0.0176444	0.0271042	0.0190434	0.0179747	0.017937	0.0175797	0.0175606	0.0189973	0.0184997	0.0178761	0.0177551	0.0113908	0.0100848	0.0162835	0.0203687	0.0167659	0.0143085	0.0172271
ACTC	0.01269	0.0100689	0.0118929	0.00877132	0.0115642	0.0182271	0.0142939	0.0102379	0.0097514	0.0117883	0.0143588	0.0196841	0.00849497	0.0124217	0.0112955	0.00495803	0.00892803	0.0131992	0.00923174	0.0305694	0.0131423	0.00803737	0.0121139	0.0128878	0.00997751	0.0112568	0.0134065	0.014542	0.0162675	0.0119903	0.0158797	0.017173	0.0160253	0.009092	0.0150679	0.0102913	0.0101008	0.0163832	0.0201273	0.0122128	0.0157891	0.0161923	0.0142606	0.023676	0.0263595	0.0199345	0.0121343	0.00835327	0.00968215
ACTN	0	0	0	0	0	0	0	0	0	0	0	0	0	0	0	0	0	0	0	0	0	0	0	0	0	0	1.68765e-05	9.87269e-05	0	0	0	0	1.07814e-05	0	8.16253e-06	0	0	0	0	0	0	0	0	0	0	0	0	0	0
ACAG	0.0107725	0.0287854	0.0140679	0.0307016	0.0122697	0.0149594	0.0133525	0.0105612	0.0110634	0.0115603	0.0121852	0.00765251	0.0100199	0.011797	0.0117617	0.00989129	0.0120195	0.0221709	0.0115266	0.0116433	0.0101833	0.0101623	0.0136784	0.0105692	0.0092966	0.0122283	0.0111249	0.0184583	0.014133	0.0121111	0.013708	0.013617	0.0117065	0.00815866	0.0129015	0.00802883	0.00800465	0.014361	0.0157746	0.0108935	0.0139149	0.0135847	0.0176411	0.0182208	0.0188339	0.011833	0.00911884	0.0143469	0.011738
ACAC	0.00950828	0.00909526	0.00931048	0.00993735	0.0105988	0.0125341	0.0303154	0.0288538	0.0100307	0.00814749	0.00911997	0.00592611	0.00845188	0.00929985	0.00922983	0.00810572	0.00805427	0.0104755	0.00931707	0.0201747	0.00931325	0.00803598	0.00865286	0.00841087	0.00949723	0.00805548	0.00717729	0.0106168	0.0106377	0.0088809	0.0117507	0.0121174	0.0104337	0.00880034	0.0119951	0.00963581	0.00863197	0.0116479	0.0144554	0.00995765	0.012387	0.0112516	0.00766761	0.00598393	0.0141736	0.0196159	0.00698671	0.00321108	0.0101635
ACAN	0	0	0	0	0	0	0	0	0	0	0	0	0	0	0	0	0	0	0	0	0	0	0	0	0	0	0	0	0	0	0	0	0	0	0	0	0	0	2.38798e-05	0	1.12995e-05	0	0	0	0	0	0	0	0
ACGT	0.00942545	0.0102159	0.00956749	0.00975904	0.0197044	0.00984758	0.00971832	0.0096097	0.0103627	0.00912762	0.00916163	0.00999565	0.00982652	0.00955271	0.0194859	0.0113494	0.0111672	0.00966142	0.0100202	0.00971831	0.00949182	0.00933809	0.00906949	0.00948161	0.0108905	0.0106115	0.0102393	0.0102751	0.0100653	0.0189235	0.01055	0.0102952	0.0108876	0.00984775	0.0102329	0.00971717	0.0104648	0.0100437	0.00991326	0.0103412	0.0106304	0.00949749	0.00740135	0.00556099	0.00895938	0.0102484	0.0100807	0.0105806	0.0104513
ACGG	0.0320868	0.0311091	0.0291062	0.0291291	0.0310845	0.0336559	0.0327663	0.0291593	0.0295412	0.0289548	0.0319925	0.0315559	0.0290304	0.0303413	0.0307614	0.0312254	0.0320123	0.0313678	0.0302489	0.0329725	0.032289	0.0278255	0.0278405	0.0311498	0.031717	0.0320105	0.0345151	0.0315828	0.0328209	0.031763	0.0348811	0.0351133	0.0333285	0.0307484	0.033884	0.035324	0.0311824	0.0342925	0.0351571	0.0323038	0.0340002	0.0324239	0.0232519	0.0239942	0.0348608	0.0225087	0.0356517	0.0350586	0.038956
ACGC	0.0165442	0.0147451	0.0153414	0.0125584	0.0140142	0.0177168	0.0449775	0.0140225	0.01296	0.0127339	0.0151215	0.0165457	0.0150321	0.0156906	0.0330302	0.0329744	0.0147861	0.0334279	0.0134048	0.0143538	0.0143312	0.0133047	0.032124	0.0139946	0.0144745	0.0163629	0.017752	0.0157837	0.0177875	0.0153238	0.0165472	0.0182795	0.0185305	0.0160437	0.0164611	0.0153033	0.0157834	0.0169662	0.0190912	0.0167098	0.0173825	0.0188707	0.0109181	0.0100865	0.0178273	0.0117246	0.0185747	0.0207005	0.0182224
ACGN	0	0	0	0	0	0	0	7.717e-06	0	0	0	0	0	0	0	0	0	0	0	0	0	0	0	0	0	0	1.78001e-05	0	0	0	1.20627e-05	0	1.37825e-05	0	6.79627e-06	1.41034e-05	0	0	1.29144e-05	0	1.76891e-05	0	0	0	0	0	0	0	0
ACCG	0.0242469	0.0248989	0.0256224	0.0259144	0.0250028	0.0266487	0.0254956	0.025451	0.0255356	0.0247467	0.0248653	0.0248501	0.0255884	0.0262073	0.0252037	0.0246612	0.0438073	0.0255517	0.025244	0.0244259	0.0249975	0.0251929	0.0254596	0.0246307	0.0258313	0.026386	0.0250231	0.026899	0.0274398	0.0270136	0.0276	0.0277725	0.0261346	0.0250864	0.0265882	0.0251421	0.0270763	0.027409	0.0279201	0.0266709	0.0268572	0.0272374	0.0219539	0.0196965	0.0270372	0.0226271	0.0250314	0.0257657	0.0255921
ACCC	0.00972143	0.00978718	0.0101586	0.00814092	0.00848354	0.00550804	0.00660792	0.00974576	0.0106997	0.00996494	0.00786241	0.0109146	0.00962112	0.0106197	0.00909683	0.00935988	0.00770847	0.00967846	0.00908747	0.00734506	0.00727369	0.0126734	0.0105376	0.00764709	0.0112304	0.00989178	0.00803939	0.00983099	0.00774851	0.010699	0.00814447	0.00703649	0.00828158	0.0113337	0.00694495	0.00895167	0.0122695	0.00661075	0.00423855	0.00978712	0.00587159	0.00775376	0.0131236	0.0146044	0.00660296	0.0191634	0.0119327	0.00938722	0.0116211
ACCN	0	3.81782e-05	0	0	0	0	1.33998e-05	0	0	0	0	0	0	0	0	0	0	0	0	0	0	0	0	0	6.90295e-06	1.97886e-05	0	0	0	1.83419e-05	9.65018e-06	9.63633e-06	2.50278e-05	1.16499e-05	6.18567e-06	0	2.64198e-05	1.09794e-05	8.24654e-06	7.89294e-05	3.45192e-05	8.92993e-06	0	0	0	0	0	0	0
ACNT	0	0	0	0	0	0	0	0	0	4.71168e-06	3.56842e-06	0	0	0	0	0	0	0	0	0	0	0	0	0	0	0	0	0	0	0	1.3403e-05	0	1.63036e-05	0	0	0	0	0	0	0	1.98118e-05	8.37412e-06	0	0	0	0	0	0	0
ACNG	0	0	6.74764e-06	0	0	0	0	0	0	0	3.27955e-06	0	0	0	0	0	0	0	0	0	0	0	0	0	0	0	0	5.57315e-05	0	0	9.57359e-06	8.76782e-06	0	1.79282e-05	0	0	0	0	0	3.80749e-05	0	0	0	0	0	0	0	0	0
ACNC	0	0	0	0	0	0	0	7.717e-06	0	0	3.56842e-06	0	0	0	0	0	0	0	0	0	0	1.0716e-05	0	0	6.06772e-06	1.30094e-05	1.78891e-05	4.15006e-05	2.21249e-05	0	1.84006e-05	3.31108e-05	1.3369e-05	1.69153e-05	1.33752e-05	8.60993e-06	0	1.02062e-05	2.61421e-05	3.26597e-05	3.25479e-05	2.19624e-05	0	0	0	0	0	0	0
ACNN	0	0	0	0	0	0	0	0	0	0	0	0	0	0	0	0	0	0	0	0	0	0	8.31172e-06	0	0	0	0	0	0	0	0	0	0	0	0	0	0	0	0	0	0	0	0	0	0	0	0	0	0
ANTG	0	0	0	0	0	0	0	0	0	0	0	0	0	0	0	0	0	0	0	0	0	0	0	0	0	0	0	0	0	0	0	0	0	0	0	0	0	0	0	0	0	0	0	0	0	0	0	0	0
ANTC	0	0	0	0	0	0	0	0	0	0	0	0	0	0	0	0	0	0	0	0	0	0	0	0	0	0	0	0	0	0	0	0	0	0	0	0	0	0	0	0	0	0	0	0	0	0	0	0	0
ANTN	0	0	0	0	0	0	0	0	0	0	0	0	0	0	0	0	0	0	0	0	0	0	0	0	0	0	0	0	0	0	0	0	0	0	0	0	0	0	0	0	0	0	0	0	0	0	0	0	0
ANAG	0	0	0	0	0	0	0	0	0	0	0	0	0	0	0	0	0	0	0	0	0	0	0	0	0	0	1.25979e-05	9.87269e-05	0	0	0	0	1.07814e-05	0	0	0	2.00954e-05	0	8.66408e-06	0	0	0	0	0	0	0	0	0	0
ANAC	0	0	0	0	0	0	0	0	0	0	0	0	0	0	0	0	0	0	0	0	0	0	0	0	0	0	0	0	0	0	1.14883e-05	1.21601e-05	0	0	1.71668e-05	0	0	1.60141e-05	8.24654e-06	0	0	0	0	0	0	0	0	0	0
ANAN	0	0	0	0	0	0	0	0	0	0	0	0	0	0	0	0	0	0	0	0	0	0	0	0	0	0	0	0	0	0	0	0	0	0	0	0	0	0	0	0	0	0	0	0	0	0	0	0	0
ANGG	0	0	0	0	0	0	0	0	0	0	0	0	0	0	0	0	0	0	0	0	0	0	0	0	0	0	0	0	0	0	1.20627e-05	7.76768e-06	0	0	2.75525e-05	1.95737e-05	0	0	1.51542e-05	1.55635e-05	0	0	0	0	0	0	0	0	0
ANGC	0	0	0	0	0	0	0	0	0	0	0	0	0	0	0	0	0	0	0	0	0	0	0	0	0	0	0	0	0	0	0	0	0	0	8.99734e-06	0	0	0	0	2.20953e-05	0	0	0	0	0	0	0	0	0
ANGN	0	0	0	0	0	0	0	0	0	0	0	0	0	0	0	0	0	0	0	0	0	0	0	0	0	0	0	0	0	0	0	0	0	0	0	0	0	0	0	0	0	0	0	0	0	0	0	0	0
ANCG	0	0	0	0	0	0	0	0	0	0	0	0	0	0	0	0	0	0	0	0	0	0	0	0	6.82012e-06	0	0	0	0	0	2.16363e-05	0	0	0	0	0	0	1.42786e-05	0	1.56779e-05	0	0	0	0	0	0	0	0	0
ANCC	0	0	0	0	0	0	0	1.66335e-05	0	4.78881e-06	0	4.94778e-06	0	0	0	0	0	0	0	0	0	0	0	0	0	7.40192e-06	3.16871e-05	3.05838e-05	0	0	4.28736e-05	1.26105e-05	1.54555e-05	4.46948e-05	2.1143e-05	0	0	3.86162e-05	7.69059e-06	1.66578e-05	3.88526e-05	7.88345e-06	0	0	0	0	0	0	0
ANCN	0	0	0	0	0	0	0	0	0	0	0	0	0	0	0	0	0	0	0	0	0	0	0	0	0	0	0	0	0	0	0	0	0	0	0	0	0	0	0	0	0	0	0	0	0	0	0	0	0
ANNT	0	0	0	0	0	0	0	0	0	0	0	0	0	0	0	0	0	0	0	0	0	0	0	0	0	0	0	0	0	0	0	0	0	0	0	0	0	0	0	0	0	0	0	0	0	0	0	0	0
ANNG	0	0	0	0	0	0	0	0	0	0	0	0	0	0	0	0	0	0	0	0	0	0	0	0	0	0	0	0	0	0	0	0	0	0	0	0	0	0	0	0	0	0	0	0	0	0	0	0	0
ANNC	0	0	0	0	0	0	0	0	0	0	0	0	0	0	0	0	0	0	0	0	0	0	0	0	0	0	0	0	1.7484e-05	0	0	0	0	0	0	0	0	0	0	0	1.83442e-05	0	0	0	0	0	0	0	0
ANNN	0	0	0	0	0	0	0	0	0	0	0	0	0	0	0	0	0	0	0	0	0	0	0	0	0	0	0	0	0	0	0	0	0	0	0	0	0	0	0	0	0	0	0	0	0	0	0	0	0
GTTG	0.01754	0.01534	0.0146281	0.0145709	0.0156851	0.0163141	0.0136662	0.0152774	0.0134229	0.0140071	0.0150662	0.0161453	0.0136294	0.0157464	0.0151505	0.0144637	0.0153401	0.015716	0.0148412	0.0159683	0.0132701	0.0140064	0.0142875	0.013154	0.0143937	0.0155964	0.0139129	0.0155255	0.0176038	0.016713	0.0166998	0.0177982	0.01668	0.0136012	0.0164985	0.0146936	0.0142204	0.0163808	0.0170369	0.015406	0.0173241	0.0170408	0.0129455	0.00903278	0.0164887	0.0155572	0.0172455	0.0130344	0.0151158
GTTC	0.0104382	0.00959005	0.00921904	0.00741916	0.00947767	0.0131263	0.0105607	0.00854866	0.00789759	0.00738808	0.00964342	0.00751068	0.00840879	0.00968509	0.00879136	0.00844557	0.00915905	0.0098014	0.0080242	0.00824794	0.00967834	0.00802196	0.00890748	0.00874286	0.00679334	0.00824439	0.00914373	0.00871433	0.0125294	0.0101238	0.0106069	0.0133261	0.0114129	0.00724973	0.0123536	0.010747	0.00696998	0.0120376	0.0156626	0.00852732	0.0132501	0.0137775	0.00298562	0.00703179	0.0146354	0.0014506	0.00965483	0.00386191	0.0105671
GTTN	0	0	0	0	0	0	0	0	0	1.50954e-06	0	0	0	0	0	0	0	0	0	0	0	0	0	0	0	0	2.15531e-05	2.71334e-05	1.79211e-05	0	0	0	0	0	3.75705e-05	0	0	1.47885e-05	0	0	4.23701e-05	0	0	0	0	0	0	0	0
GTAG	0.0165289	0.0134502	0.0133743	0.0105489	0.0128077	0.0260787	0.0127643	0.0124027	0.0110425	0.0111008	0.0130521	0.0132246	0.0116217	0.0147074	0.0125812	0.0307413	0.0211497	0.0150763	0.0106346	0.0113618	0.0128412	0.0128718	0.0111019	0.0118029	0.0104964	0.0225184	0.0129018	0.0122365	0.0148691	0.0119598	0.0144228	0.0179981	0.0161155	0.0195286	0.0150121	0.0223198	0.011012	0.0152222	0.0273143	0.021027	0.0155976	0.0148789	0.0119124	0.0127569	0.0176387	0.00799847	0.0146493	0.0128001	0.0151782
GTAC	0.0148459	0.00740254	0.00572812	0.00778127	0.0161093	0.00397165	0.0161075	0.00680449	0.00720286	0.00667385	0.00596958	0.0166524	0.0168157	0.00546534	0.0360912	0.00748473	0.0070462	0.0161441	0.0165388	0.0176247	0.0064692	0.00600164	0.00618033	0.00665707	0.00993244	0.00639425	0.00808864	0.0175021	0.0134255	0.0149129	0.0157238	0.0139053	0.0152502	0.00995353	0.00624452	0.00695713	0.0196956	0.00513455	0.00405198	0.00925198	0.00562249	0.0133013	0.00512183	0.00343024	0.00174627	0.00226673	0.00706082	0.00903747	0.00669297
GTAN	0	0	0	0	0	0	0	0	0	0	0	0	0	0	0	0	0	0	0	0	0	0	0	0	0	6.46456e-06	0	9.87269e-05	3.33481e-05	0	0	2.65312e-05	0	1.1834e-05	0	1.05938e-05	0	0	1.25975e-05	0	0	0	0	0	0	0	0	0	0
GTGG	0.0107974	0.00820533	0.0102622	0.00891437	0.009674	0.0101667	0.00968789	0.00944383	0.00853162	0.00990269	0.00954098	0.0104147	0.00963465	0.0107686	0.00903145	0.0100975	0.00872024	0.00986487	0.00925957	0.00990345	0.00900972	0.00845982	0.00983974	0.00932465	0.0129102	0.0110568	0.0105639	0.0109246	0.00879016	0.00997297	0.0125127	0.00921651	0.0107409	0.0103509	0.00852665	0.00670282	0.0125886	0.00902329	0.00875611	0.0112696	0.00884138	0.00895663	0.0147846	0.0161053	0.0126772	0.0112562	0.0115327	0.0115541	0.0094597
GTGC	0.0172425	0.0201482	0.0188929	0.0190481	0.0195444	0.015494	0.0176529	0.0199003	0.0210818	0.0211262	0.0173698	0.019685	0.020988	0.0179856	0.0196881	0.0222532	0.0226381	0.0170305	0.0209774	0.0185625	0.0203536	0.0196696	0.0181601	0.0205902	0.0250275	0.019862	0.0176331	0.0217183	0.0185656	0.0198265	0.0195239	0.0160376	0.0156082	0.0239969	0.0185583	0.0220253	0.0243945	0.0178615	0.0145152	0.0223211	0.0170202	0.0175274	0.0192734	0.0151924	0.0137656	0.0373813	0.0175065	0.023951	0.018448
GTGN	0	0	6.74764e-06	0	0	0	0	0	0	0	0	0	0	0	0	0	0	0	0	0	0	0	0	0	0	5.40286e-06	1.25537e-05	0	0	0	0	0	1.3369e-05	1.42572e-05	7.33116e-06	1.14943e-05	1.17969e-05	0	1.77611e-05	0	0	1.06219e-05	0	0	0	0	0	0	0
GTCG	0.002591	0.0018565	0.00236793	0.0039046	0.00232455	0.00205046	0.00359001	0.00333858	0.00248493	0.00416573	0.00326694	0.00266153	0.00271259	0.00289891	0.00272258	0.00188897	0.00239204	0.00209592	0.00319109	0.00388737	0.00441267	0.00146808	0.00327204	0.00467944	0.00548369	0.00366462	0.00460877	0.00471125	0.0010901	0.00141138	0.00370801	0.00146613	0.00303221	0.00510894	0.00217202	0.00187835	0.00582361	0.00208936	0.00134152	0.00418348	0.00166359	0.00133493	0.00549419	0.00722048	0.00326316	0.00172084	0.00264135	0.010035	0.0041734
GTCC	0.0136044	0.0144647	0.0157634	0.0135292	0.0161206	0.0139234	0.0123323	0.0149393	0.0171223	0.0152331	0.0153399	0.0131004	0.0139387	0.0126179	0.0156337	0.017824	0.034531	0.0133517	0.0160603	0.0136056	0.0131121	0.017636	0.0163594	0.0129717	0.0117504	0.0138364	0.0114418	0.0110755	0.0168057	0.0171289	0.0134984	0.0150941	0.0129791	0.0118372	0.0178373	0.0200342	0.0125078	0.0157591	0.0166894	0.0129221	0.0170492	0.0146128	0.0179536	0.0212028	0.0173934	0.00337244	0.0162897	0.00733632	0.0167177
GTCN	0	0	0	6.19636e-06	1.92252e-05	0	1.33998e-05	0	0	0	0	0	0	0	0	0	0	0	0	0	0	1.09826e-05	0	0	0	8.75967e-06	1.76247e-05	0	0	0	0	0	0	0	0	0	1.16753e-05	5.46939e-05	2.06371e-05	2.75122e-05	1.76891e-05	0	0	0	0	0	0	0	0
GTNG	0	0	0	0	0	0	0	0	0	0	0	0	0	0	0	0	0	0	0	0	0	0	0	0	0	0	0	0	0	0	0	0	0	0	0	1.05938e-05	0	0	0	0	0	0	0	0	0	0	0	0	0
GTNC	0	0	0	0	0	0	0	0	0	0	0	0	0	0	0	0	0	0	0	0	0	0	0	0	0	0	0	0	0	0	0	0	0	0	0	1.78568e-05	1.14975e-05	0	0	1.62763e-05	0	0	0	0	0	0	0	0	0
GTNN	0	0	6.15574e-06	0	0	0	0	0	0	3.02641e-06	0	0	0	0	0	0	0	0	0	0	0	0	0	0	0	0	0	0	0	0	0	0	0	0	0	0	0	0	0	0	0	0	0	0	0	0	0	0	0
GATG	0.00724785	0.00888231	0.00692291	0.0104724	0.00707514	0.00534165	0.00892639	0.00822914	0.00912002	0.00857807	0.00788329	0.0109944	0.0110604	0.0073537	0.00843482	0.0106967	0.0089301	0.00600621	0.00885383	0.00854385	0.00770496	0.00821854	0.00826216	0.00790972	0.0125801	0.00949003	0.0109523	0.0118588	0.00571747	0.00777294	0.00761837	0.004677	0.00724291	0.0125061	0.00700561	0.008409	0.0125405	0.00647512	0.00433139	0.0111784	0.00649983	0.00666982	0.00605942	0.00520002	0.00380332	0.0108252	0.00950531	0.0169219	0.0103404
GATC	0.00425434	0.00362259	0.00547974	0.00423819	0.00473226	0.00577648	0.00543584	0.00440851	0.00540271	0.00511099	0.00408817	0.00253336	0.00384352	0.0048702	0.00399175	0.00356234	0.00421616	0.00371919	0.00427796	0.00428563	0.00435755	0.00426161	0.00548651	0.00435077	0.00550949	0.00474112	0.00402583	0.00490447	0.00574504	0.00436455	0.00687933	0.00518061	0.00454002	0.004543	0.00455934	0.00324937	0.00498227	0.00549901	0.00547832	0.00469138	0.00453018	0.00409985	0.0074263	0.00827353	0.00858383	0.00210187	0.00318676	0.00277987	0.0037742
GATN	0	0	0	0	0	0	0	0	0	0	0	0	0	0	0	0	0	0	0	0	0	1.07683e-05	0	0	0	0	1.89303e-05	0	1.55161e-05	0	0	0	0	0	8.16253e-06	0	0	0	2.3948e-05	1.6153e-05	1.96806e-05	0	0	0	0	0	0	0	0
GAAG	0.0303627	0.0276838	0.0356444	0.0371964	0.0343887	0.040086	0.038796	0.0319212	0.0359581	0.02913	0.0288477	0.0309246	0.0344832	0.0350056	0.0328671	0.0288031	0.0304737	0.0317876	0.0334169	0.0313804	0.0319664	0.0317446	0.0318906	0.0322914	0.0394199	0.038645	0.0349994	0.0390494	0.0428198	0.0396374	0.04272	0.036829	0.0335279	0.0312894	0.0363766	0.0296876	0.0367416	0.0390308	0.0379695	0.0358688	0.0355312	0.0392962	0.0292593	0.0194131	0.0405657	0.0497206	0.0278481	0.0364391	0.0320504
GAAN	0	0	7.58653e-06	0	0	0	0	0	0	0	1.86137e-06	0	0	0	0	0	0	0	0	0	0	0	0	0	0	0	1.30102e-05	0	0	0	9.65018e-06	9.68199e-06	0	1.16499e-05	0	0	2.49655e-05	1.81159e-05	1.05845e-05	2.22104e-05	1.83442e-05	8.77462e-06	0	0	0	0	0	0	0
GAGG	0.0181245	0.0174308	0.0178309	0.0190118	0.0175451	0.0144577	0.0167076	0.0177692	0.0166972	0.0203825	0.0188548	0.0192688	0.0194306	0.0164999	0.0198764	0.0174415	0.0173826	0.017008	0.0172625	0.0188957	0.018391	0.0184162	0.0197403	0.0190448	0.0189262	0.0182754	0.0185155	0.0176381	0.0174503	0.0205123	0.0148939	0.0144836	0.0164284	0.021621	0.019283	0.0185597	0.0182582	0.0148756	0.0142674	0.017653	0.0163879	0.017344	0.0310063	0.0393158	0.0216957	0.0292887	0.0215118	0.0294123	0.0230443
GAGC	0.0113281	0.00980559	0.00784281	0.00664052	0.00831834	0.0125958	0.0102887	0.0078525	0.00582129	0.00643446	0.00946778	0.00994289	0.00700975	0.00998757	0.00712316	0.00652147	0.00756932	0.00954878	0.00554733	0.0084432	0.0291759	0.00524944	0.00678412	0.00887996	0.00739709	0.0092122	0.011533	0.00716198	0.00946946	0.00715025	0.0114912	0.0132076	0.0139699	0.00673725	0.00955539	0.00700034	0.0063839	0.0106814	0.0137708	0.00691303	0.011266	0.0100228	0.00356148	0.00604513	0.0137622	0.00147949	0.0125476	0.0040187	0.00858559
GAGN	0	0	0	0	0	0	0	0	0	0	0	0	0	0	0	0	0	0	0	0	0	1.05119e-05	0	0	0	0	1.78891e-05	0	4.0046e-05	0	0	0	0	1.47488e-05	2.5902e-05	0	0	0	0	0	0	0	0	0	0	0	0	0	0
GACG	0.0217024	0.0204994	0.0202015	0.0185076	0.0228203	0.0232912	0.0200656	0.0200663	0.0198498	0.018806	0.0211007	0.0211701	0.0178787	0.0218019	0.0218713	0.0213739	0.022258	0.0403298	0.0203707	0.0222325	0.0212678	0.0195997	0.0167825	0.0207305	0.0213131	0.0235013	0.0202746	0.0211755	0.0241869	0.0241956	0.0251895	0.0250368	0.0233721	0.0178803	0.0237874	0.0244204	0.0223395	0.0232942	0.0255911	0.0216338	0.0249449	0.0236545	0.0190355	0.0180782	0.0271411	0.011726	0.0251844	0.0312295	0.0290145
GACC	0.0100105	0.0102013	0.00753907	0.00746355	0.00941524	0.00763486	0.00728755	0.00856667	0.00822965	0.00932415	0.00919595	0.00892753	0.00865103	0.00694503	0.00850007	0.0121199	0.028962	0.00758241	0.0089509	0.00932188	0.00900482	0.00847035	0.00802809	0.00858013	0.00743731	0.00729126	0.00836812	0.00723055	0.00785888	0.00731517	0.00759962	0.00907768	0.00931402	0.00978052	0.00946427	0.0121262	0.00768543	0.00860852	0.00936404	0.00886713	0.00941893	0.00822373	0.00813522	0.0112795	0.00913749	0.00758618	0.0121658	0.00343797	0.00987352
GACN	0	0	0	0	0	0	0	0	0	0	3.56842e-06	0	0	0	0	0	0	0	0	0	0	0	8.31172e-06	0	0	0	0	2.15959e-05	0	0	0	1.6609e-05	0	1.69153e-05	0	0	0	0	0	0	0	0	0	0	0	0	0	0	0
GANG	0	0	0	0	0	0	0	0	0	0	3.56842e-06	0	0	0	0	0	0	0	0	0	0	0	0	0	0	0	0	0	0	0	1.3403e-05	1.0423e-05	0	0	0	0	1.16753e-05	0	0	2.75122e-05	0	0	0	0	0	0	0	0	0
GANC	0	0	0	0	0	0	0	0	0	0	0	0	0	0	0	0	0	0	0	0	0	0	0	0	0	0	0	0	0	0	1.14883e-05	1.26105e-05	0	0	9.10075e-06	8.84173e-06	0	1.42786e-05	0	0	0	7.88345e-06	0	0	0	0	0	0	0
GANN	0	0	0	0	0	0	0	0	0	0	0	0	0	0	0	0	0	0	0	0	0	0	0	0	0	0	0	0	1.7484e-05	0	0	0	0	0	8.89624e-06	0	0	0	0	0	0	0	0	0	0	0	0	0	0
GGTG	0.00250553	0.00208133	0.00404983	0.00555324	0.00356323	0.00273116	0.00309675	0.0236772	0.00411987	0.00377531	0.00258729	0.00328656	0.00476512	0.00389935	0.00377022	0.00302104	0.00202666	0.00336058	0.00422725	0.00146557	0.00217038	0.00481974	0.00481848	0.00312573	0.0051949	0.00408319	0.00175863	0.00831274	0.00492833	0.00634453	0.00415261	0.00218438	0.000950861	0.00534831	0.00278588	0.00309231	0.00726299	0.00317078	0.00145867	0.0048377	0.00232309	0.00409019	0.00732104	0.00697622	0.00261966	0.0105225	0.00208341	0.00333341	0.00369752
GGTN	0	0	6.15574e-06	0	0	0	0	0	0	3.02641e-06	0	0	0	0	0	0	0	0	0	0	0	0	0	0	0	0	0	0	0	0	0	0	0	0	0	1.78568e-05	1.14975e-05	0	0	1.62763e-05	0	0	0	0	0	0	0	0	0
GGAG	0.0133043	0.0146459	0.0160082	0.0171305	0.0154331	0.0142739	0.0161193	0.0156447	0.0153962	0.0174728	0.0168416	0.016328	0.0163047	0.0144994	0.0164123	0.0139456	0.0155698	0.0173232	0.0158708	0.0161883	0.0153904	0.0142368	0.0174096	0.016297	0.0188189	0.015977	0.0175504	0.0191341	0.0150454	0.0173254	0.015659	0.0134512	0.0135713	0.0196957	0.0149707	0.0152225	0.0183457	0.0151007	0.0140163	0.0182926	0.0156319	0.0155531	0.0245923	0.0317149	0.017444	0.0300275	0.0170098	0.0160348	0.0132993
GGAN	6.54328e-06	0	0	0	0	0	0	0	0	0	0	0	0	0	0	0	0	0	0	0	0	0	0	8.99281e-06	0	0	2.12965e-05	0	0	0	0.000116888	1.0423e-05	0	0	2.85454e-05	8.84173e-06	1.16753e-05	2.87787e-05	0	2.75122e-05	1.72777e-05	0	0	0	0	0	0	0	0
GGGG	0.00950573	0.0134495	0.0119477	0.0116195	0.0108066	0.00808611	0.00958059	0.0121118	0.0128979	0.0117637	0.00906527	0.0107879	0.0105897	0.0128525	0.0106767	0.0119499	0.0112359	0.0116057	0.0108894	0.0116479	0.0105948	0.0136715	0.0123075	0.0115255	0.0167024	0.0335066	0.0130547	0.0124644	0.0093127	0.0126499	0.0123513	0.0105332	0.0124415	0.0130699	0.00801954	0.010608	0.017613	0.00774999	0.0060629	0.0126285	0.00653805	0.00972047	0.0110176	0.0095209	0.00597176	0.0253475	0.0109269	0.0104058	0.00997755
GGGC	0.00852028	0.0101054	0.00742991	0.00853913	0.00702906	0.0049752	0.00670111	0.00873567	0.00746969	0.010145	0.00802415	0.0102329	0.0103796	0.00777064	0.00764598	0.00970905	0.00777546	0.00805128	0.00837641	0.00916249	0.00869871	0.00899903	0.0085101	0.00867837	0.00843022	0.00801497	0.00868339	0.00610233	0.0052752	0.00603391	0.0059272	0.00717811	0.00812238	0.0109247	0.00616448	0.00862103	0.00903736	0.00582872	0.0048527	0.00814943	0.00571592	0.00518744	0.015767	0.0156925	0.00590207	0.00257228	0.0103579	0.0104076	0.00954175
GGGN	0	0	0	0	0	0	0	0	0	0	0	0	0	0	0	0	0	0	0	0	0	0	0	0	0	8.13398e-06	1.35012e-05	0	0	1.29149e-05	1.13265e-05	0	0	1.12982e-05	1.802e-05	0	0	0	7.80756e-06	1.66578e-05	1.1654e-05	0	0	0	0	0	0	0	0
GGCG	0.0114143	0.00915637	0.00895872	0.00803549	0.00744755	0.00950826	0.00977975	0.00852051	0.00708633	0.00880283	0.0083114	0.0122582	0.0103545	0.0300517	0.00805039	0.00766429	0.00762542	0.00906592	0.00691656	0.0099876	0.00999278	0.00675326	0.00768202	0.00945114	0.0106066	0.0100098	0.011404	0.0093697	0.00705545	0.00593225	0.00992125	0.00994881	0.0124704	0.0106634	0.00804897	0.00611658	0.0109976	0.00808919	0.00949716	0.00873576	0.00838287	0.00750944	0.0135012	0.0109409	0.0129471	0.00451473	0.0122494	0.0246257	0.0159161
GGCC	0.00572051	0.00589898	0.00505759	0.00494263	0.00536315	0.00267787	0.00279896	0.00625697	0.005361	0.00579954	0.00546125	0.00759836	0.00611382	0.00570944	0.00596375	0.00761142	0.00482126	0.00582146	0.00608324	0.00533798	0.00508824	0.00782154	0.00575928	0.00510127	0.00547044	0.00538956	0.00401883	0.00514927	0.00458697	0.00667464	0.00405229	0.00439106	0.00523869	0.0064199	0.00467173	0.00662994	0.00588358	0.0038938	0.00299453	0.00571189	0.00416887	0.00466456	0.0083944	0.00847405	0.00384567	0.00944105	0.00828766	0.0083701	0.00749528
GGCN	0	0	0	0	0	0	0	0	0	0	0	0	0	0	0	0	0	0	0	0	0	0	0	0	8.69913e-06	2.16596e-05	0	0	0	0	0	1.02658e-05	0	0	6.79627e-06	8.77424e-06	1.71749e-05	0	0	0	2.19082e-05	1.01415e-05	0	0	0	0	0	0	0
GGNG	0	0	0	0	0	0	0	0	0	0	3.32708e-06	0	0	0	0	0	0	0	0	0	0	0	0	0	0	1.55359e-05	3.39459e-05	0	1.80112e-05	1.29149e-05	1.13265e-05	1.6609e-05	0	2.82135e-05	9.95932e-06	0	0	2.82096e-05	1.81261e-05	1.80695e-05	1.05757e-05	0	0	0	0	0	0	0	0
GGNC	0	0	0	0	0	0	0	0	0	0	0	0	0	0	0	0	0	0	0	0	0	0	0	0	0	0	0	0	0	0	0	0	0	0	0	0	0	0	0	0	0	0	0	0	0	0	0	0	0
GGNN	0	0	0	0	0	0	0	0	0	0	0	0	0	0	0	0	0	0	0	0	0	0	0	0	0	0	1.64876e-05	0	0	0	1.07224e-05	0	0	0	0	0	0	0	0	0	1.83442e-05	0	0	0	0	0	0	0	0
GCTG	0.0360393	0.03737	0.0369905	0.0405397	0.0375371	0.0354526	0.0371982	0.0395327	0.0383447	0.0396859	0.0365007	0.0368279	0.0386442	0.0363927	0.0371666	0.0393132	0.0388902	0.0349344	0.0407047	0.0378459	0.0395385	0.0382747	0.0380359	0.0404657	0.0422383	0.0406824	0.0401657	0.041563	0.0371242	0.0389508	0.0380092	0.0356519	0.0374921	0.0409584	0.0375939	0.0397602	0.0429645	0.0380216	0.0349271	0.0403245	0.0368788	0.0373916	0.0435303	0.0397094	0.0346308	0.0632924	0.0404555	0.0434648	0.0396866
GCTN	0	0	0	0	0	0	0	0	0	0	0	0	0	0	0	0	0	0	0	0	0	0	0	0	0	0	1.78001e-05	0	0	0	0	0	1.3369e-05	0	0	0	0	0	0	0	0	0	0	0	0	0	0	0	0
GCAG	0.0418251	0.0420002	0.0375321	0.0377809	0.0384358	0.0361079	0.0385079	0.0395759	0.0390069	0.038446	0.0386284	0.042412	0.0403815	0.0387899	0.0392852	0.0410624	0.0403789	0.0373971	0.0388767	0.0409019	0.0428213	0.0405352	0.0366767	0.0416938	0.0443951	0.0414603	0.0430313	0.0420793	0.0374333	0.0384792	0.0390717	0.0389761	0.0425947	0.0459297	0.0394273	0.0471087	0.0445912	0.037537	0.0366922	0.0422337	0.0379806	0.0385236	0.0434738	0.0410656	0.0388004	0.056111	0.0473342	0.059787	0.0554133
GCAN	0	0	0	0	0	0	0	0	0	0	0	0	0	0	0	0	0	0	0	0	0	0	0	0	9.57882e-06	8.50796e-06	1.7979e-05	0	3.49889e-05	0	9.57359e-06	0	0	1.13841e-05	0	1.14943e-05	0	1.34816e-05	1.06393e-05	1.90375e-05	0	0	0	0	0	0	0	0	0
GCGG	0.0282996	0.0271647	0.0280505	0.0283636	0.0275365	0.0291457	0.0280591	0.0281288	0.0268433	0.0271858	0.0269867	0.029686	0.030543	0.0296032	0.027503	0.0284805	0.0466973	0.0295355	0.0272625	0.0281515	0.0269189	0.0263665	0.0266573	0.0269536	0.0313979	0.0302527	0.0302834	0.0308199	0.0294775	0.0287016	0.030806	0.0300591	0.0307561	0.0315237	0.0289779	0.0272425	0.0329565	0.0293132	0.0300109	0.0321121	0.0292909	0.0300558	0.0297484	0.0274103	0.0304898	0.0344449	0.0319073	0.0352243	0.0300679
GCGC	0.00210477	0.00317617	0.00428404	0.00322216	0.00218071	0.00220336	0.00232425	0.00318631	0.00265844	0.00451205	0.00316483	0.00174287	0.00253835	0.0232871	0.00304111	0.00160163	0.00217236	0.00306455	0.00321092	0.00182013	0.0220447	0.00472464	0.00455121	0.023385	0.00364404	0.00351294	0.00231029	0.00517229	0.00275279	0.0034028	0.00277646	0.00206553	0.00181243	0.00360125	0.00208163	0.00147158	0.0043269	0.00241582	0.00177594	0.00341781	0.00174798	0.00293606	0.0116966	0.0122158	0.00671283	0.00225942	0.00300223	0.0133159	0.00878075
GCGN	0	0	0	0	0	0	0	0	0	0	6.72051e-06	0	0	0	0	0	1.79379e-05	0	0	0	0	0	0	0	0	0	1.36039e-05	0	0	0	0	9.63633e-06	0	0	8.16253e-06	0	0	0	1.98863e-05	0	0	0	0	0	0	0	0	0	0
GCCG	0.0337888	0.0310134	0.0301898	0.0283799	0.0299374	0.0330392	0.0304285	0.0299569	0.0289399	0.0278302	0.0291309	0.0326131	0.0299657	0.0328865	0.0298631	0.0296123	0.0291287	0.0292538	0.0285585	0.0300186	0.0307673	0.0303972	0.0280574	0.0299844	0.0317333	0.0336469	0.0329513	0.0334713	0.0336859	0.0315368	0.0344685	0.0356647	0.0368344	0.0309798	0.0327456	0.0317427	0.0339988	0.032971	0.0347112	0.032163	0.0332757	0.0331523	0.0292514	0.0243516	0.0374623	0.0323013	0.0369649	0.0453086	0.0418989
GCCN	0	0	0	0	0	0	0	0	0	3.4255e-06	0	0	0	0	0	0	0	0	0	0	1.60006e-05	0	0	9.8822e-06	0	2.10764e-05	6.8123e-05	0	0	1.29149e-05	1.13265e-05	7.68008e-06	2.75649e-05	1.12982e-05	1.74173e-05	0	0	0	7.80756e-06	0	0	0	0	0	0	0	0	0	0
GCNG	5.2735e-05	2.5493e-05	0	0	0	1.07076e-05	0	3.10171e-05	0	3.4255e-06	2.72596e-05	8.96015e-06	0	0	0	0	0	0	0	0	0	0	0	9.8822e-06	1.73983e-05	2.30027e-05	0	0	0	0	9.57359e-06	2.92995e-05	0	1.1976e-05	0	1.75485e-05	1.71749e-05	0	0	0	3.25597e-05	2.0283e-05	0	0	0	0	0	0	0
GCNC	0	0	0	0	0	5.35378e-06	0	0	0	0	0	0	0	0	0	0	0	0	0	0	1.50006e-05	0	0	0	0	7.3651e-06	0	3.04081e-05	0	0	0	0	0	0	2.25719e-05	0	0	0	9.50643e-06	1.80695e-05	1.05757e-05	0	0	0	0	0	0	0	0
GCNN	0	0	0	0	0	0	0	0	0	0	0	0	0	0	0	0	0	0	0	0	0	0	0	0	0	0	1.64876e-05	0	0	0	0	0	0	0	0	0	0	0	0	0	0	0	0	0	0	0	0	0	0
GNTG	0	0	0	0	0	0	0	0	0	0	0	4.94778e-06	0	0	0	0	0	0	0	0	0	0	0	0	0	8.50796e-06	1.7979e-05	0	3.49889e-05	0	9.57359e-06	0	0	1.13841e-05	0	1.14943e-05	0	2.80472e-05	1.06393e-05	1.90375e-05	0	0	0	0	0	0	0	0	0
GNTN	0	0	0	0	0	0	0	0	0	0	0	0	0	0	0	0	0	0	0	0	0	0	0	0	0	0	0	0	0	0	0	0	0	0	0	0	0	0	0	0	0	0	0	0	0	0	0	0	0
GNAG	0	0	0	0	0	0	0	0	0	0	0	0	0	0	0	0	0	0	0	0	0	0	0	0	0	0	1.78001e-05	0	0	0	0	0	1.3369e-05	0	1.00223e-05	0	0	0	0	0	0	0	0	0	0	0	0	0	0
GNAN	0	0	0	0	0	0	0	0	0	0	0	0	0	0	0	0	0	0	0	0	0	0	0	0	0	0	0	0	0	0	0	0	0	0	0	0	0	0	0	0	1.79022e-05	0	0	0	0	0	0	0	0
GNGG	0	3.81782e-05	0	0	0	0	0	0	0	0	3.40943e-06	0	0	0	0	0	0	0	0	0	0	0	0	0	0	2.63824e-05	9.89309e-05	0	3.65823e-05	6.70852e-05	1.13265e-05	1.73164e-05	4.19402e-05	3.72052e-05	2.55108e-05	1.41034e-05	0	1.45656e-05	3.13558e-05	0	2.65875e-05	2.96934e-05	0	0	0	0	0	0	0
GNGN	0	0	0	0	0	0	0	0	0	0	0	0	0	0	0	0	0	0	0	0	0	0	0	0	0	0	0	0	0	0	0	0	0	0	9.95932e-06	0	0	0	0	0	0	0	0	0	0	0	0	0	0
GNCG	0	0	0	0	0	0	0	0	0	0	0	0	0	0	0	0	0	0	0	0	0	0	0	0	0	0	0	0	0	0	0	0	0	0	0	0	0	0	1.29144e-05	0	0	0	0	0	0	0	0	0	0
GNCN	0	0	0	0	0	0	0	0	0	0	0	0	0	0	0	0	0	0	0	0	0	0	0	0	0	0	0	0	0	0	0	0	0	0	0	0	0	0	0	0	0	0	0	0	0	0	0	0	0
GNNG	0	0	0	0	0	0	0	0	0	0	0	0	0	0	0	0	0	0	0	0	0	0	0	0	0	0	1.64876e-05	0	0	0	0	0	0	0	0	0	0	0	0	0	0	0	0	0	0	0	0	0	0
GNNC	0	0	0	0	0	0	0	0	0	0	0	0	0	0	0	0	0	0	0	0	0	0	0	0	0	0	0	0	0	0	0	0	0	0	0	0	0	0	0	0	0	0	0	0	0	0	0	0	0
GNNN	0	0	6.15574e-06	0	0	0	0	0	0	3.02641e-06	0	0	0	0	0	0	0	0	0	0	0	0	0	0	0	0	0	0	0	0	1.07224e-05	0	0	0	0	0	0	0	0	0	0	0	0	0	0	0	0	0	0
CTTG	0.00795297	0.00812963	0.00594451	0.00777842	0.00588917	0.00486307	0.00726272	0.00792338	0.00727756	0.00794081	0.00793922	0.0276298	0.00778836	0.00606172	0.00604297	0.00871896	0.00644638	0.00696806	0.00806431	0.00682747	0.00671459	0.00753068	0.00763164	0.00668673	0.00647205	0.00721211	0.00982597	0.00604757	0.00658538	0.00866427	0.00462205	0.00583353	0.0070385	0.00754622	0.00657711	0.00841	0.006451	0.00616339	0.00421636	0.00676734	0.00658158	0.00629536	0.0100417	0.0112733	0.00427768	0.00342049	0.00988607	0.0106001	0.00788625
CTTN	0	0	0	0	0	0	0	0	0	0	1.86137e-06	0	0	0	0	0	0	0	0	0	0	0	0	0	0	0	2.12965e-05	0	0	0	8.57399e-05	6.42451e-05	0	0	2.75907e-05	2.85616e-05	0	3.61194e-05	0	0	2.85772e-05	0	0	0	0	0	0	0	0
CTAG	0.000513697	0.000451198	0.000908593	0.00107545	0.000687703	0.000958239	0.000736116	0.000563302	0.000763039	0.000398872	0.000461175	0.000567503	0.000560692	0.0004065	0.000742544	0.000629953	0.000591514	0.000566197	0.000624169	0.000338157	0.00041768	0.00112913	0.000582838	0.000409451	0.000313406	0.00141784	0.00132312	0.00131787	0.00174139	0.00126232	0.000593587	0.0192828	0.000324614	0.000550014	0.000507886	0.00121586	0.000505958	0.00106053	0.00046586	0.000454654	0.000681914	0.00102498	0.000242273	0.000619704	0.000299458	0.00081528	0.000811652	0.00113149	0.000320377
CTAN	0	0	0	0	0	0	0	8.31677e-06	0	0	0	0	0	0	0	0	0	0	0	0	0	0	0	0	0	0	0	0	0	0	0	0	0	0	0	0	0	0	0	0	0	0	0	0	0	0	0	0	0
CTGG	0.0177263	0.0173871	0.0176809	0.0172965	0.0179839	0.01797	0.0182493	0.0181579	0.018168	0.0183672	0.0180512	0.0156855	0.0169573	0.0170936	0.0179101	0.0172555	0.0180591	0.0175024	0.0181321	0.0170823	0.0180848	0.017455	0.0184047	0.0175341	0.0185421	0.0173394	0.0178539	0.0180783	0.0181694	0.0174876	0.0189962	0.0184755	0.0174413	0.0181917	0.0202617	0.0189125	0.0184048	0.019191	0.0191623	0.0184875	0.019132	0.0181169	0.0203218	0.0216654	0.0197525	0.0161168	0.0182595	0.0152539	0.0178636
CTGN	0	0	6.15574e-06	0	0	0	1.33998e-05	0	0	6.24003e-06	0	0	2.01873e-05	0	0	0	0	0	0	0	0	0	0	0	0	8.50796e-06	1.82542e-05	0	1.79211e-05	0	0	0	1.06103e-05	1.13841e-05	0	1.14943e-05	0	1.45656e-05	1.06393e-05	1.90375e-05	0	0	0	0	0	0	0	0	0
CTCG	0.00826002	0.00721199	0.0067616	0.00457529	0.0066881	0.0105186	0.00767255	0.00626083	0.00476081	0.00780971	0.00795775	0.00449726	0.00397543	0.00773345	0.00665099	0.00347214	0.00396808	0.00685188	0.00416517	0.0255366	0.00839724	0.00600436	0.00705288	0.00816584	0.0041609	0.00587624	0.00549806	0.00685487	0.00938771	0.00689525	0.0083574	0.0108005	0.00987096	0.00459227	0.0074099	0.00602501	0.00407688	0.00859307	0.0115635	0.00450755	0.00831904	0.00866033	0.00869381	0.014626	0.0170724	0.0169327	0.00789337	0.00348214	0.00598524
CTCN	0	0	1.34953e-05	0	0	0	0	0	0	0	1.32953e-05	0	0	0	0	0	1.79379e-05	0	0	0	0	0	0	0	1.48603e-05	0	1.36039e-05	3.41355e-05	0	0	0	1.20171e-05	0	1.79282e-05	1.89058e-05	0	0	1.81159e-05	2.2068e-05	0	1.79022e-05	0	0	0	0	0	0	0	0
CTNG	0	0	0	0	0	0	0	0	0	0	0	0	0	0	0	0	0	0	0	0	0	0	0	0	0	0	0	0	0	0	0	0	0	0	0	0	0	0	0	0	1.76891e-05	0	0	0	0	0	0	0	0
CTNN	0	0	0	0	0	0	0	0	0	0	0	0	0	0	0	0	0	0	0	0	0	0	0	0	0	0	2.15531e-05	0	0	0	1.07224e-05	0	0	0	0	0	0	0	0	0	0	0	0	0	0	0	0	0	0
CATG	0.00170054	0.00240137	0.0231553	0.00447144	0.00244897	0.00191123	0.00296696	0.0032492	0.0237589	0.00285844	0.0218556	0.00287236	0.00388515	0.00314314	0.00315216	0.00191998	0.00265828	0.00270566	0.00408399	0.00107227	0.00265355	0.00483023	0.00486638	0.00285771	0.00326856	0.00355418	0.00357329	0.00472066	0.0219253	0.00468068	0.00235809	0.00189393	0.00155905	0.00485077	0.00261423	0.00273126	0.00371394	0.00354919	0.00148709	0.00395723	0.0026898	0.0036664	0.00346761	0.00163839	0.000853291	0.00970073	0.0021873	0.000864691	0.00112629
CATN	0	0	0	0	0	0	0	0	0	0	0	0	0	0	0	0	0	0	0	0	0	0	0	8.99281e-06	0	0	3.3833e-05	0	1.7832e-05	1.61134e-05	0	9.63633e-06	1.06103e-05	0	0	0	0	1.07753e-05	0	0	0	0	0	0	0	0	0	0	0
CAAN	0	0	0	0	0	0	0	0	0	0	0	0	1.25031e-05	0	0	0	0	0	0	0	0	0	0	0	0	5.58636e-06	1.35012e-05	2.21381e-05	0	0	1.20627e-05	0	1.07814e-05	1.2372e-05	1.75932e-05	8.97989e-06	1.75977e-05	0	9.91975e-06	0	0	0	0	0	0	0	0	0	0
CAGG	0.0126778	0.0352162	0.0159524	0.0338153	0.0115681	0.00870166	0.0133059	0.0158117	0.0161159	0.0156249	0.0125968	0.0150213	0.0163577	0.0146446	0.0135576	0.0155371	0.0121388	0.0132546	0.0141758	0.0123081	0.0150265	0.0182202	0.0177189	0.0151083	0.0154887	0.0135449	0.0154891	0.0118316	0.00989008	0.0122492	0.0104921	0.0111406	0.0137473	0.017029	0.0104973	0.0144997	0.0156555	0.0106782	0.0071791	0.013253	0.00906805	0.00872057	0.0254174	0.0249165	0.0107481	0.0114858	0.0153683	0.0248089	0.0195698
CAGN	0	0	0	0	0	5.35378e-06	0	0	0	0	0	0	0	0	0	0	0	0	0	0	0	0	0	0	0	0	1.82542e-05	1.97426e-05	1.7484e-05	0	0	0	1.3369e-05	0	0	0	0	1.45656e-05	0	0	2.97923e-05	1.01415e-05	0	0	0	0	0	0	0
CACG	0.0251671	0.0260135	0.0228435	0.0241305	0.0238943	0.0235386	0.0442675	0.0243403	0.0239306	0.0233667	0.0252584	0.0261826	0.0261442	0.0227399	0.0237314	0.0279145	0.0267073	0.0247875	0.0248884	0.0248292	0.0247957	0.0225115	0.0229214	0.0244181	0.0268796	0.0247111	0.0279978	0.0252636	0.0239828	0.0241937	0.0243665	0.0250476	0.0266268	0.0277887	0.0265371	0.027541	0.0265822	0.0253862	0.0252053	0.02822	0.0262105	0.0256881	0.0172723	0.0140679	0.0187217	0.0215423	0.0302875	0.0237026	0.024619
CACN	0	0	0	0	0	0	0	7.717e-06	0	4.71168e-06	0	0	0	0	0	1.79203e-05	0	0	0	0	0	1.0716e-05	0	0	6.06772e-06	5.60752e-06	1.78891e-05	4.15006e-05	2.21249e-05	0	1.84006e-05	1.65018e-05	2.96726e-05	0	6.04401e-06	8.60993e-06	0	0	1.58236e-05	3.26597e-05	3.46706e-05	2.19624e-05	0	0	0	0	0	0	0
CANG	0	0	0	0	0	0	0	0	0	0	0	0	0	0	0	0	0	0	0	0	0	0	0	0	9.57882e-06	0	0	0	2.03649e-05	0	0	0	0	0	0	0	0	0	0	0	0	0	0	0	0	0	0	0	0
CANN	0	0	0	0	0	0	0	0	0	0	0	0	0	0	0	0	0	0	0	0	0	0	0	0	0	0	0	0	0	0	0	9.63633e-06	0	0	0	0	0	0	0	0	0	0	0	0	0	0	0	0	0
CGTN	0	0	0	0	0	0	0	0	0	0	0	0	0	0	0	0	0	0	0	0	0	0	0	0	0	0	1.89303e-05	0	0	0	1.14883e-05	0	0	0	0	8.87587e-06	0	0	8.24654e-06	1.56779e-05	0	0	0	0	0	0	0	0	0
CGAN	0	0	0	0	0	0	0	0	0	0	3.56842e-06	0	0	0	0	0	0	0	0	0	0	0	0	0	0	0	0	0	3.58647e-05	0	2.47295e-05	1.26105e-05	1.37825e-05	0	9.10075e-06	0	0	1.42786e-05	0	0	0	0	0	0	0	0	0	0	0
CGGG	0.0146312	0.0151402	0.0164142	0.0164574	0.0152591	0.0133272	0.0145153	0.0161921	0.0161122	0.0185527	0.0165379	0.0178044	0.0177285	0.0162015	0.0163885	0.0174976	0.0152633	0.016443	0.0163176	0.0171408	0.0154138	0.0157596	0.0186382	0.0163744	0.0173593	0.017074	0.0172864	0.0160252	0.0144498	0.0175655	0.0151968	0.0141164	0.0159978	0.0173807	0.0135749	0.0135599	0.0184853	0.013735	0.012589	0.0163705	0.0140629	0.0145128	0.0260932	0.0306512	0.017747	0.0213053	0.0182796	0.0209649	0.0187886
CGGN	0	0	0	0	0	0	0	8.31677e-06	0	1.7915e-06	0	0	0	0	0	0	0	0	0	0	0	0	0	0	0	7.40192e-06	1.7979e-05	3.05838e-05	0	0	0	2.92195e-05	1.54555e-05	4.21685e-05	9.10075e-06	0	0	2.77602e-05	1.03185e-05	0	5.71591e-05	0	0	0	0	0	0	0	0
CGCG	0.0162907	0.0168953	0.0178616	0.0175047	0.0161604	0.0182944	0.0380914	0.0167303	0.0165788	0.0171643	0.0167846	0.0170117	0.0363118	0.0371717	0.0360085	0.0346938	0.0356851	0.0361492	0.0355643	0.0361941	0.0358706	0.0356409	0.0372341	0.0565972	0.0186251	0.018801	0.0192935	0.0196494	0.0183463	0.017879	0.0186514	0.0183332	0.0186236	0.018431	0.0174328	0.0152081	0.0189866	0.0181538	0.0186448	0.018709	0.0178436	0.0182033	0.0209817	0.0211363	0.0210585	0.0209909	0.0183579	0.021762	0.0193445
CGCN	2.63675e-05	1.27465e-05	0	0	0	5.35378e-06	0	1.55086e-05	0	0	1.00476e-05	4.48008e-06	0	0	0	0	0	0	0	0	0	0	0	0	0	0	0	0	0	0	0	0	0	0	0	1.05938e-05	0	0	0	2.20953e-05	1.05757e-05	0	0	0	0	0	0	0	0
CGNG	0	3.81782e-05	0	0	0	0	0	7.717e-06	0	0	6.72051e-06	0	0	0	0	0	1.79379e-05	0	0	0	1.50006e-05	1.0716e-05	0	0	6.06772e-06	1.85499e-05	6.82257e-05	4.15006e-05	0	1.83419e-05	1.84006e-05	4.15273e-05	2.81577e-05	1.16499e-05	2.25719e-05	2.27133e-05	0	0	4.13841e-05	3.26597e-05	2.93431e-05	1.90207e-05	0	0	0	0	0	0	0
CGNN	0	0	0	0	0	0	0	0	0	0	0	0	0	0	0	0	0	0	0	0	0	0	0	0	0	0	0	0	0	0	0	0	0	0	0	0	0	0	0	0	0	0	0	0	0	0	0	0	0
CCTN	0	0	0	0	0	0	0	0	0	0	0	0	0	0	0	0	0	0	0	0	0	1.07683e-05	0	0	0	0	1.25979e-05	0	0	0	1.07224e-05	0	0	0	1.00223e-05	0	2.00954e-05	0	0	0	0	0	0	0	0	0	0	0	0
CCAN	0	0	0	0	0	0	0	4.76302e-06	0	0	0	0	0	0	0	0	0	0	0	0	0	0	0	0	0	0	0	0	0	0	0	0	1.08251e-05	1.1834e-05	0	0	2.00954e-05	1.45656e-05	1.18693e-05	0	1.17461e-05	8.37412e-06	0	0	0	0	0	0	0
CCGG	0.00563789	0.00668881	0.00618231	0.00612515	0.00622135	0.00331247	0.00348329	0.00688582	0.00633331	0.00666575	0.005692	0.0079791	0.00728939	0.00590398	0.00657745	0.00827241	0.00580672	0.0054158	0.00684845	0.00612675	0.00534069	0.00794351	0.00670188	0.00577121	0.00568462	0.00626504	0.00519311	0.00524581	0.00570316	0.00782219	0.00361538	0.00463054	0.0054689	0.00636009	0.0053052	0.00759241	0.00674799	0.00447965	0.00331577	0.0059115	0.00536497	0.00591077	0.0099243	0.00907926	0.00396723	0.00951392	0.0075486	0.00845817	0.00728423
CCGN	0	3.81782e-05	0	0	0	0	0	0	0	0	1.82197e-06	0	0	0	0	0	0	0	0	0	0	1.0716e-05	0	0	6.06772e-06	1.85499e-05	3.16871e-05	4.15006e-05	1.48723e-05	1.83419e-05	1.84006e-05	3.1891e-05	1.43753e-05	1.16499e-05	0	8.60993e-06	0	0	2.40702e-05	3.26597e-05	4.74701e-05	1.90207e-05	0	0	0	0	0	0	0
CCCN	0	0	0	6.19636e-06	1.92252e-05	0	0	0	0	0	0	0	0	0	0	0	0	0	0	0	0	0	0	0	0	0	3.08079e-05	0	1.80112e-05	0	0	7.76768e-06	0	0	7.87827e-06	1.05938e-05	0	1.45656e-05	7.49412e-06	0	1.49335e-05	1.01415e-05	0	0	0	0	0	0	0
CCNG	0	0	0	6.19636e-06	1.92252e-05	0	1.33998e-05	0	0	3.4255e-06	0	0	0	0	0	0	0	0	0	0	0	1.09826e-05	0	9.8822e-06	6.90295e-06	1.97886e-05	0	0	0	0	9.65018e-06	0	0	0	1.74173e-05	0	2.64198e-05	0	0	3.12414e-05	1.12567e-05	0	0	0	0	0	0	0	0
CCNN	0	0	0	0	0	0	0	0	0	0	0	0	0	0	0	0	0	0	0	0	0	0	0	0	0	0	0	0	0	0	0	0	0	0	0	0	0	0	0	0	0	0	0	0	0	0	0	0	0
CNTN	0	0	0	0	0	0	0	0	0	0	0	0	0	0	0	0	0	0	0	0	0	0	0	0	0	0	0	0	0	0	0	1.20171e-05	0	0	0	0	0	0	0	0	1.79022e-05	0	0	0	0	0	0	0	0
CNAN	0	0	0	0	0	0	0	0	0	0	0	0	0	0	0	0	0	0	0	0	0	0	0	0	0	0	0	0	0	0	0	1.20171e-05	0	0	0	0	0	0	0	0	0	0	0	0	0	0	0	0	0
CNGN	0	0	0	0	0	0	0	0	0	0	0	0	0	0	0	0	0	0	0	0	0	0	0	0	0	0	0	0	0	0	0	0	0	0	0	0	0	0	0	0	0	0	0	0	0	0	0	0	0
CNCN	0	0	0	0	0	0	0	0	0	0	0	0	0	0	0	0	0	0	0	0	0	0	0	0	0	0	0	0	0	0	0	0	0	0	9.95932e-06	0	0	0	0	0	0	0	0	0	0	0	0	0	0
CNNG	0	0	0	0	0	0	0	0	0	0	0	0	0	0	0	0	0	0	0	0	0	0	0	0	0	0	0	0	0	0	0	0	0	0	0	0	0	0	0	0	0	0	0	0	0	0	0	0	0
CNNN	0	0	0	0	0	0	0	0	0	0	0	0	0	0	0	0	0	0	0	0	0	0	0	0	0	0	0	0	0	0	0	0	0	0	0	0	0	0	0	0	0	0	0	0	0	0	0	0	0
NTTN	0	0	0	0	0	0	0	0	0	0	0	0	0	0	0	0	0	0	0	0	0	0	0	0	0	0	0	0	0	0	0	0	0	0	0	0	0	0	0	0	0	0	0	0	0	0	0	0	0
NTAN	0	0	0	0	0	0	0	0	0	0	0	0	0	0	0	0	0	0	0	0	0	0	0	0	0	0	0	0	0	0	0	0	0	0	0	0	0	0	0	0	0	0	0	0	0	0	0	0	0
NTGN	0	0	0	0	0	0	0	0	0	0	0	0	0	0	0	0	0	0	0	0	0	0	0	0	0	0	0	0	0	0	0	0	0	0	0	0	0	0	0	0	0	0	0	0	0	0	0	0	0
NTCN	0	0	0	0	0	0	0	0	0	0	0	0	0	0	0	0	0	0	0	0	0	0	0	0	0	0	0	0	0	0	0	1.20171e-05	0	0	7.33116e-06	0	0	0	0	0	0	0	0	0	0	0	0	0	0
NTNN	0	0	0	0	0	0	0	0	0	0	0	0	0	0	0	0	0	0	0	0	0	0	0	0	0	0	0	0	0	0	0	0	0	0	0	0	0	0	0	0	0	0	0	0	0	0	0	0	0
NATN	0	0	0	0	0	0	0	0	0	0	0	0	0	0	0	0	0	0	0	0	0	0	0	0	0	0	0	0	0	0	0	0	0	0	0	0	0	0	0	0	0	0	0	0	0	0	0	0	0
NAGN	0	0	0	0	0	0	0	0	0	0	0	0	0	0	0	0	0	0	0	0	0	0	0	0	0	0	0	0	0	0	0	0	0	0	0	0	0	0	0	0	0	0	0	0	0	0	0	0	0
NACN	0	0	0	0	0	0	0	0	0	0	0	0	0	0	0	0	0	0	0	0	0	0	0	0	0	0	0	0	0	0	0	0	0	0	7.33116e-06	0	0	0	0	0	0	0	0	0	0	0	0	0	0
NANN	0	0	0	0	0	0	0	0	0	0	0	0	0	0	0	0	0	0	0	0	0	0	0	0	0	0	0	0	0	0	0	0	0	0	0	0	0	0	0	0	0	0	0	0	0	0	0	0	0
NGGN	0	0	0	0	0	0	0	0	0	0	0	0	0	0	0	0	0	0	0	0	0	0	0	0	0	0	0	0	0	0	0	0	0	0	9.95932e-06	0	0	0	0	0	0	0	0	0	0	0	0	0	0
NGCN	0	0	0	0	0	0	0	0	0	0	0	0	0	0	0	0	0	0	0	0	0	0	0	0	0	0	0	0	0	0	0	0	0	0	0	0	0	0	0	0	0	0	0	0	0	0	0	0	0
NGNN	0	0	0	0	0	0	0	0	0	0	0	0	0	0	0	0	0	0	0	0	0	0	0	0	0	0	0	0	0	0	0	0	0	0	0	0	0	0	0	0	0	0	0	0	0	0	0	0	0
NCGN	0	0	0	0	0	0	0	0	0	0	0	0	0	0	0	0	0	0	0	0	0	0	0	0	0	0	0	0	0	0	0	0	0	0	0	0	0	0	0	0	0	0	0	0	0	0	0	0	0
NCNN	0	0	0	0	0	0	0	0	0	0	0	0	0	0	0	0	0	0	0	0	0	0	0	0	0	0	0	0	0	0	0	0	0	0	0	0	0	0	0	0	0	0	0	0	0	0	0	0	0
NNNN	0	0	6.15574e-06	0	0	0	0	0	0	0	0	0	0	0	0	0	0	0	0	0	0	0	0	0	0	0	0	0	0	0	1.07224e-05	0	0	0	0	0	0	0	0	0	0	0	0	0	0	0	0	0	0
ATGTG	0.019515	0.0009026	0.0201305	0.000584664	0.019571	0.0193722	0.000438526	0.000664949	0.0199503	0.0201526	0.0197445	0.00061601	0.00054836	0.000979626	0.000744433	0.000370768	0.000759791	0.000574541	0.00106641	6.72264e-05	0.000624603	0.00119545	0.00067668	0.000484862	0.000260654	0.000719817	0.000404805	5.45464e-05	0.000424662	0.000492342	7.78605e-05	0.000458995	0.000270207	0.000705701	0.000851822	0.000795574	0.00030459	0.000851854	0.000503466	0.000224162	0.000529113	0.00139457	4.81338e-05	0.000399031	0.000980965	0.000345327	0.000353781	0.000150792	0.00136106
AATGT	0.0192097	0.00113266	0.000843447	0.00117017	0.00124932	0.0197207	0.000650335	0.000804505	0.00103207	0.0213488	0.000873644	0.000446197	0.000652221	0.000520764	0.00112345	0.00140007	0.00180301	0.000879005	0.0011148	0.00128767	0.00102845	0.000794353	0.000896483	0.00121431	0.00122648	0.00107623	0.000681409	0.0012336	0.00071624	0.00101417	0.000967522	0.000244774	0.000149955	0.00140701	0.000522909	0.000458765	0.00118193	0.000621313	0.000396191	0.00152143	0.000526094	0.000351253	8.05452e-05	0.000139998	0.000124993	0.00017189	6.07905e-05	0.000718096	0.000159541
CAATG	0.0289175	0.0103567	0.0101683	0.0100504	0.0105483	0.0100332	0.0101037	0.0102288	0.0103771	0.0107136	0.0102207	0.0104231	0.010647	0.0102229	0.0100005	0.0111889	0.0103921	0.00998666	0.0101603	0.0110017	0.0106936	0.00974042	0.0099865	0.0106374	0.0121247	0.0106595	0.0105268	0.0110714	0.0101212	0.0101251	0.0104439	0.01015	0.0102945	0.0122832	0.010155	0.0105723	0.0114286	0.0101578	0.010464	0.0111584	0.00992126	0.0102148	0.0111858	0.0112627	0.0109407	0.0103619	0.0108642	0.0117167	0.0109743
CCAAT	0.0225772	0.00458648	0.00385897	0.00420309	0.00454714	0.00223149	0.00341516	0.00428157	0.00459104	0.00621323	0.00516815	0.00346091	0.00385954	0.00253586	0.00474669	0.0053994	0.00534041	0.00427244	0.00468344	0.00487736	0.00490339	0.0043986	0.00507361	0.00509912	0.00534213	0.00348413	0.0047273	0.00420139	0.00274813	0.00369785	0.003583	0.00268811	0.00299546	0.0053822	0.0040622	0.00602846	0.00544531	0.00354231	0.00243417	0.00497038	0.0120843	0.00343061	0.0102256	0.0128489	0.00409502	0.00104569	0.00477969	0.00256153	0.00403733
TCCAA	0.0102311	0.00169893	0.00364082	0.00394371	0.00256908	0.00128687	0.00247007	0.00325586	0.00396307	0.00475065	0.00259893	0.000801453	0.00257244	0.00217111	0.00294192	0.00244858	0.00262203	0.00266969	0.00323392	0.00249903	0.00199208	0.00358648	0.00452175	0.00264616	0.0038623	0.00249206	0.00180068	0.00338865	0.00163693	0.00270244	0.00269372	0.000617679	0.00065222	0.00305842	0.00164867	0.00127509	0.00374523	0.00184713	0.000530038	0.00318601	0.00134217	0.0105438	0.0107087	0.0117845	0.00374284	0.001736	0.000777147	0.00172902	0.000974354
ATCCA	0.0105111	0.00190879	0.0035737	0.0042799	0.00271826	0.00195842	0.00367102	0.00290589	0.00462647	0.00404327	0.00274247	0.000913971	0.00290765	0.00216664	0.00290809	0.00243657	0.00347664	0.0023927	0.00399993	0.00235958	0.00256281	0.00365462	0.00505829	0.00306872	0.00531074	0.00312849	0.00343683	0.00462935	0.00222182	0.0031012	0.0036375	0.00106967	0.000873664	0.00371129	0.0023439	0.00165839	0.00473597	0.0030584	0.000895857	0.00435206	0.00202299	0.0115461	0.00712076	0.00656104	0.00193304	0.00240401	0.00107472	0.0014355	0.000455728
AATCC	0.0107877	0.00169748	0.00222369	0.00183291	0.00205433	0.00179504	0.00254293	0.00164374	0.00171947	0.00285197	0.00322901	0.00141088	0.00175141	0.00180631	0.00227505	0.00144826	0.0027044	0.00393576	0.00216899	0.00362345	0.0022788	0.00103855	0.00241255	0.00244043	0.00275753	0.00152589	0.00262414	0.00208068	0.00080864	0.00116853	0.00249735	0.00166503	0.00185895	0.00237578	0.00252238	0.00138163	0.0116251	0.00216902	0.00228899	0.00259748	0.00235408	0.0116606	0.0061984	0.00615883	0.0019799	0.00101978	0.00200779	0.00130052	0.000656411
TAATC	0.00998375	0.00095933	0.000492681	0.000431137	0.010679	0.000216583	0.00999573	0.000918781	0.000380558	0.000693639	0.0109164	0.010746	0.0101187	0.00106877	0.0107292	0.00143342	0.000743922	0.0108304	0.0104638	0.0112518	0.000660034	0.000586286	0.000672209	0.0106624	0.00119878	0.0010031	0.00109411	0.0107319	0.0103602	0.0115138	0.0105918	0.0106328	0.0109165	0.000920553	0.00990298	0.00063294	0.0109597	0.000730084	0.000685019	0.0014777	0.000972934	0.01068	0.000470809	0.000283926	3.16065e-05	0.00063146	0.00176539	0.000141049	0.000252567
GTAAT	0.0102067	0.0101493	0.0205817	0.01047	0.0104644	0.0100342	0.0102939	0.0107822	0.0104962	0.01257	0.0210792	0.0103961	0.0102579	0.020198	0.0110174	0.0101809	0.0100767	0.0110589	0.0104526	0.0112162	0.0104912	0.0107167	0.0115989	0.0210155	0.0103629	0.0108446	0.0107764	0.0109047	0.0104106	0.0110623	0.0106877	0.0104648	0.0103791	0.0110662	0.0194202	0.0104072	0.010999	0.0103941	0.0102368	0.0109339	0.0103995	0.0104118	0.0186356	0.0224978	0.0143583	0.0106193	0.0112364	0.0126055	0.0117947
GGTAA	0.0148345	0.0125824	0.0129537	0.0113704	0.0126239	0.0145948	0.0128313	0.0124339	0.0121004	0.0132888	0.0129337	0.0131765	0.0120161	0.0139088	0.0121876	0.0112828	0.0117269	0.0124443	0.011858	0.0125027	0.0134954	0.0121052	0.012793	0.0133363	0.0116158	0.0130914	0.0129113	0.0126154	0.0139388	0.0122128	0.0141789	0.0149882	0.016052	0.0123658	0.0133029	0.0121099	0.0118901	0.0141103	0.0152612	0.01224	0.0140513	0.0135911	0.0169028	0.018914	0.0191929	0.0116746	0.0139134	0.0129795	0.0154077
CGGTA	0.0163262	0.0174146	0.0180151	0.0186581	0.0177427	0.0187566	0.0189536	0.0177662	0.0177489	0.0179068	0.0179265	0.0178139	0.01765	0.0181929	0.0178203	0.0171179	0.0178366	0.0173177	0.0170129	0.0187089	0.0176116	0.0167495	0.0181697	0.0177295	0.0197787	0.0204203	0.0205612	0.0194744	0.0185712	0.0182504	0.0211657	0.0194973	0.0194163	0.0183491	0.0179802	0.0163745	0.0204989	0.0193443	0.0186939	0.0195116	0.0183397	0.0180401	0.0162498	0.0156744	0.0194369	0.0122658	0.0183619	0.0217783	0.0185933
GCGGT	0.00989969	0.0101534	0.0101981	0.010994	0.0102676	0.0100031	0.010261	0.0105698	0.0101125	0.010616	0.0100712	0.0103214	0.0111344	0.0101297	0.0101893	0.0109066	0.0294021	0.0100863	0.0103554	0.0105477	0.0103512	0.00987255	0.0101246	0.0103211	0.0112158	0.0106413	0.0106193	0.0109999	0.0104836	0.0103166	0.0108337	0.0103969	0.0104989	0.0118806	0.0104187	0.0103348	0.0114441	0.0104398	0.010232	0.0116599	0.010443	0.0105302	0.0111529	0.0114565	0.0108208	0.0110346	0.0111014	0.0115561	0.0109933
CGCGG	0.0250887	0.0250317	0.0262478	0.0262431	0.0251683	0.0273617	0.0264328	0.025922	0.0250801	0.0250203	0.0246473	0.0261827	0.0262872	0.0270576	0.0256279	0.0243645	0.0439688	0.0258211	0.0247959	0.0252222	0.0249355	0.0255021	0.025324	0.0253162	0.027696	0.0283767	0.0279075	0.0289301	0.0280589	0.0270771	0.0283822	0.0282624	0.0283218	0.0271085	0.0269358	0.0249369	0.0285289	0.0274742	0.0278896	0.027172	0.0272021	0.0277835	0.0282526	0.0263504	0.0297312	0.0315417	0.0276573	0.0319721	0.0290863
GCCGC	0.0166053	0.0152627	0.0163948	0.0161387	0.0153828	0.0174508	0.0165571	0.0159485	0.0152961	0.0148163	0.0149647	0.0168248	0.0164007	0.0173184	0.0156485	0.0146151	0.015035	0.0159614	0.0148756	0.0151531	0.015251	0.015796	0.015465	0.0153683	0.0169924	0.0179747	0.017631	0.0181502	0.0178317	0.0168819	0.0180445	0.0180456	0.0185314	0.0161822	0.0166183	0.0146473	0.0185064	0.0173283	0.0177737	0.0168907	0.0171075	0.0174553	0.0172404	0.0150625	0.0192093	0.0210354	0.0178739	0.0207695	0.0183632
AGCCG	0.0198096	0.019655	0.0190836	0.0190187	0.0195189	0.0196568	0.0197323	0.0192172	0.0194923	0.0189175	0.0187174	0.0201179	0.019748	0.0192566	0.0193911	0.0198925	0.0198381	0.0186161	0.0194606	0.0196894	0.019615	0.0193689	0.0188237	0.0196362	0.0217031	0.0211261	0.0209598	0.0211343	0.0204559	0.0201785	0.0209233	0.0204052	0.0210075	0.0211825	0.0206309	0.0206115	0.0219995	0.0204324	0.0200074	0.0213103	0.0205869	0.0205108	0.0183881	0.0167177	0.019623	0.0210597	0.0217911	0.0220712	0.0212808
CAGCC	0.0121465	0.0144726	0.0141459	0.0162445	0.0142421	0.0125965	0.013357	0.0153821	0.0150384	0.0151662	0.0139463	0.0133874	0.0149613	0.0133653	0.0145859	0.0154094	0.0141515	0.0138646	0.016104	0.0131231	0.0138475	0.0164224	0.0165656	0.0144629	0.0139249	0.0145954	0.014402	0.0157839	0.0149805	0.016502	0.0125937	0.0134315	0.012878	0.0158163	0.0148489	0.0163503	0.0150273	0.0147434	0.0130128	0.0151725	0.0145883	0.0149632	0.015884	0.014343	0.0114355	0.0237856	0.0149502	0.0123984	0.014202
GCAGC	0.0218817	0.0217667	0.0218665	0.0218438	0.0216368	0.021408	0.0218026	0.0213827	0.0212962	0.0217987	0.020817	0.022293	0.0220372	0.0222147	0.0219853	0.0214605	0.0217569	0.0210531	0.0212821	0.0219231	0.0221417	0.021824	0.0212143	0.0223222	0.0234055	0.0239603	0.0234192	0.0241265	0.0224045	0.0230393	0.0221246	0.0217756	0.0229279	0.0225704	0.0214146	0.0221238	0.0239223	0.0214152	0.0213353	0.022556	0.0215918	0.0225442	0.0238428	0.0238865	0.0234174	0.0299251	0.0239687	0.0300396	0.0256785
AGCAG	0.023512	0.0239285	0.0221629	0.0222625	0.022451	0.0213228	0.0217827	0.0233166	0.0227019	0.0226987	0.0225811	0.0237075	0.0230051	0.0223597	0.0230231	0.0229236	0.0232462	0.0219774	0.0226042	0.0232253	0.0241742	0.0230744	0.0216713	0.0238581	0.0253676	0.0234156	0.0237011	0.0237255	0.0222037	0.0225128	0.0232744	0.0229018	0.0242377	0.0261414	0.0233675	0.026077	0.0257192	0.0225018	0.022103	0.0240629	0.0226227	0.0225525	0.0246441	0.0249297	0.0230549	0.0274807	0.025525	0.0289141	0.0280409
CAGCA	0.0211982	0.0218934	0.0214868	0.0218145	0.0222055	0.0210156	0.0224991	0.0215883	0.022144	0.022313	0.0209419	0.0215473	0.0219443	0.0210898	0.0216634	0.0221853	0.0228806	0.0205052	0.0218889	0.0230421	0.0226405	0.020668	0.0209036	0.0228658	0.0259566	0.0232926	0.023373	0.0231122	0.0211559	0.0213447	0.0237581	0.0211391	0.0221127	0.0237631	0.0216653	0.0226624	0.0249373	0.0217386	0.0208057	0.0232835	0.0213336	0.0207488	0.0241238	0.0235529	0.0216452	0.027264	0.021812	0.0235446	0.0218572
CCAGC	0.0130834	0.014773	0.0141418	0.0154448	0.0148567	0.0123074	0.0141951	0.0149899	0.0159403	0.0155213	0.0139943	0.0135997	0.0151733	0.0131447	0.0145584	0.0161392	0.01567	0.0132608	0.0158629	0.0145761	0.014625	0.0153757	0.0154974	0.0148864	0.0168938	0.0145609	0.014997	0.0153407	0.0137237	0.0146392	0.0142852	0.0129333	0.0130724	0.016797	0.0150526	0.0162301	0.0169562	0.0146101	0.0126022	0.0161698	0.0141835	0.0134654	0.0151974	0.0139677	0.0110771	0.0152493	0.0147464	0.0128125	0.0138529
GCCAG	0.00985537	0.0100158	0.00995413	0.0100651	0.00990779	0.0098532	0.0102393	0.00999978	0.00984492	0.010252	0.00988177	0.0101495	0.0100074	0.00997345	0.0100405	0.00996379	0.0100915	0.00962728	0.0103171	0.0101021	0.0100082	0.00985504	0.00985394	0.0100748	0.01124	0.010527	0.0104256	0.0107419	0.010186	0.0101979	0.0105425	0.010266	0.0102884	0.0109987	0.0103055	0.0101698	0.0108456	0.0102321	0.0100453	0.0105599	0.0103339	0.0101637	0.0111278	0.0113893	0.0107349	0.0137276	0.010688	0.0113317	0.0108917
TGCCA	0.00976357	0.00988774	0.00990333	0.0100167	0.00986718	0.00986112	0.0100671	0.00991677	0.0100015	0.0102257	0.00989221	0.00993777	0.00998	0.00983023	0.0100197	0.0100235	0.0102122	0.00987867	0.010003	0.0100348	0.0102224	0.00977355	0.00991058	0.0103539	0.0109982	0.0105072	0.010645	0.0106355	0.0102758	0.0102204	0.0101934	0.0102755	0.0102897	0.0106078	0.0102677	0.0102116	0.0108842	0.0102349	0.00999278	0.0106185	0.0104256	0.0102556	0.0110672	0.0110531	0.0106679	0.0102824	0.0106494	0.0112332	0.010833
GTGCC	0.00993107	0.0101598	0.0105268	0.0100948	0.00999587	0.00985636	0.0100481	0.0099068	0.0103147	0.0108096	0.00992352	0.0102478	0.0105777	0.0100035	0.00998121	0.0106172	0.0108661	0.0101914	0.0106668	0.010026	0.0101856	0.00990346	0.0103564	0.0103853	0.0116073	0.0105727	0.0106222	0.0107378	0.0103831	0.0103248	0.0106079	0.0103222	0.0103148	0.0115596	0.0104098	0.0103747	0.0111306	0.0106336	0.0103955	0.0112016	0.0106427	0.0103973	0.0111319	0.011557	0.0107044	0.0103497	0.010698	0.0113265	0.0108483
CGTGC	0.0129641	0.0144399	0.0127216	0.0127786	0.0132943	0.0114743	0.012025	0.0132385	0.0136851	0.0136119	0.012457	0.0137707	0.0141729	0.0116806	0.01318	0.0157894	0.0154472	0.0120757	0.0135771	0.0132959	0.0139772	0.0131865	0.0119421	0.013777	0.0153551	0.0130417	0.0126865	0.0137739	0.012677	0.0128309	0.0131952	0.0127325	0.0127543	0.0166602	0.0138657	0.0166738	0.0152075	0.0131911	0.012283	0.0152603	0.0133508	0.0128445	0.0086284	0.00733251	0.00923841	0.0103062	0.014421	0.0120533	0.013498
ACGTG	0.0107603	0.010462	0.00838382	0.0086241	0.00915861	0.0096637	0.0101234	0.00964908	0.00981973	0.00927531	0.00982345	0.010339	0.010309	0.00930365	0.00874825	0.011163	0.0104718	0.00903498	0.00888128	0.010107	0.010501	0.00798543	0.00865807	0.0102333	0.0110667	0.00961615	0.0113337	0.0090372	0.00823464	0.00783795	0.0103209	0.0101049	0.0119574	0.010175	0.00994744	0.00957653	0.0105139	0.00957883	0.00975885	0.0103331	0.0100308	0.00853559	0.00594171	0.00567869	0.0084519	0.00142734	0.0118207	0.010545	0.0102797
TACGT	0.007042	0.00627626	0.007016	0.00564907	0.0260714	0.00768649	0.00735035	0.00602875	0.00694987	0.00618224	0.00583021	0.00703016	0.00648016	0.00754645	0.02539	0.00653819	0.00689285	0.00660132	0.00592	0.00712795	0.00670741	0.0053921	0.00573373	0.00651375	0.00834666	0.00781204	0.00769973	0.00730457	0.00628172	0.0233866	0.00889605	0.00745818	0.00828784	0.00699218	0.00655568	0.00447258	0.00794834	0.00721363	0.007656	0.00729814	0.00703644	0.00607273	0.00476354	0.00386527	0.00817412	0.00127214	0.0064735	0.00995905	0.0075557
CTACG	0.00656314	0.00531211	0.00563964	0.00413539	0.00488146	0.016783	0.00622753	0.0049972	0.00529451	0.00449247	0.00511953	0.00637267	0.00541553	0.00685781	0.00488701	0.0239296	0.0146449	0.00538449	0.00440768	0.00498483	0.00560782	0.00471944	0.00491864	0.00533705	0.00602495	0.0156668	0.00675124	0.00557495	0.00591322	0.00516035	0.00715931	0.00726717	0.00819922	0.0142133	0.00566226	0.0131132	0.00608256	0.00625835	0.0166823	0.0146591	0.00641114	0.00565762	0.00465178	0.00359212	0.00819598	0.000952523	0.00626815	0.00921203	0.00753994
ACTAC	0.00780484	0.00542978	0.00727577	0.00556474	0.00592356	0.00803412	0.00680944	0.00589402	0.00569628	0.00544599	0.00622402	0.00722264	0.00574816	0.00761937	0.00640279	0.00452045	0.00478935	0.00734236	0.00516898	0.0055482	0.00545951	0.00637476	0.00616729	0.00555532	0.0062711	0.00729283	0.00660682	0.00636419	0.00701681	0.00611364	0.00777749	0.00840543	0.0084431	0.005015	0.00656072	0.00434494	0.00667942	0.00710511	0.00829264	0.00603944	0.00717112	0.00673057	0.0089428	0.00896825	0.010095	0.000940475	0.00756278	0.00979323	0.00800044
AACTA	0.00785171	0.0062558	0.00841	0.00765426	0.00763914	0.00864639	0.00731021	0.00715034	0.00702797	0.00508416	0.0068628	0.00822905	0.00725834	0.00840159	0.00795171	0.00652995	0.00625039	0.00715016	0.00657057	0.0073548	0.00605343	0.00751093	0.00688253	0.005805	0.00660995	0.00865501	0.0077026	0.00689365	0.00921862	0.00883128	0.00830679	0.00981604	0.00905995	0.00468291	0.00838084	0.00596685	0.00684375	0.00850868	0.0088122	0.00627106	0.00928683	0.00842065	0.00580101	0.00457671	0.00825225	0.000992297	0.00866606	0.00933883	0.00759963
TAACT	0.00955121	0.00781192	0.00896399	0.00876915	0.00842166	0.0107099	0.00968747	0.00810326	0.008246	0.00634148	0.008702	0.0101752	0.008947	0.00935464	0.00900106	0.00726052	0.00766099	0.00972197	0.00873969	0.00765782	0.00776579	0.00951998	0.00840696	0.00765862	0.00902069	0.0105483	0.0113875	0.010225	0.0105128	0.00996998	0.00938049	0.0114365	0.0112616	0.00748835	0.00932971	0.00909839	0.00866186	0.0104534	0.0108288	0.00877717	0.0101379	0.0108957	0.00959368	0.00476756	0.00889053	0.0107907	0.0104968	0.0111177	0.0107253
CTAAC	0.00998604	0.00790733	0.00944523	0.00831908	0.00835609	0.0113754	0.0105901	0.00805871	0.00883908	0.00627723	0.00872536	0.00946489	0.00905346	0.00973136	0.00914193	0.00740995	0.00831664	0.0112062	0.00891632	0.00788421	0.00711215	0.00860572	0.00822941	0.00675926	0.00919726	0.0106865	0.0126221	0.0103075	0.0106319	0.00992185	0.00971405	0.0116253	0.0107995	0.00771695	0.0099408	0.00905595	0.0090697	0.0113058	0.0119832	0.00979058	0.0112287	0.0116023	0.00999137	0.00554471	0.010259	0.0108304	0.0114829	0.0183747	0.0136099
GCTAA	0.0101147	0.0101657	0.00984347	0.0101298	0.00994799	0.0104444	0.0104074	0.0103813	0.0102066	0.00981347	0.00966917	0.0101474	0.0101246	0.0102487	0.00967892	0.0100423	0.0100786	0.00924107	0.0107303	0.0102483	0.010252	0.00999592	0.00991869	0.0102094	0.0110452	0.0114527	0.0112938	0.0113233	0.010954	0.0106248	0.0105845	0.0106654	0.0107926	0.0111002	0.0106647	0.0109602	0.0110912	0.0106674	0.0102134	0.0105035	0.0103988	0.0105705	0.00959704	0.0064942	0.0102574	0.018043	0.0110598	0.0172353	0.0138322
GGCTA	0.00966685	0.0100066	0.00940396	0.0091161	0.00968429	0.00988407	0.00996867	0.00931551	0.0098572	0.00893451	0.0092595	0.0100235	0.00980764	0.00960546	0.00960885	0.00993428	0.0098791	0.00934981	0.0101261	0.00992499	0.00999575	0.00966355	0.00918517	0.00970269	0.0107566	0.0104554	0.0103843	0.0104228	0.0101711	0.0105141	0.0104281	0.0103083	0.0102421	0.0109542	0.010298	0.0104867	0.0105574	0.0101359	0.0100937	0.0105524	0.0102645	0.0103325	0.00737163	0.00553842	0.00901022	0.0124478	0.0104223	0.0108365	0.0104346
CCGGC	0.00539264	0.00571198	0.00519791	0.00488601	0.00485201	0.00337183	0.0035743	0.00558842	0.00544874	0.00504685	0.00395693	0.00664798	0.0064766	0.00544919	0.00519051	0.00630568	0.00473276	0.0038713	0.00557229	0.00461669	0.00497323	0.0071314	0.00507945	0.00527854	0.00547878	0.00568839	0.00477663	0.0057973	0.00467145	0.00563538	0.00326376	0.00405923	0.00518268	0.00619898	0.00485811	0.00671539	0.00663042	0.00393297	0.00304601	0.00486133	0.00400232	0.00505458	0.0070908	0.00308607	0.00331856	0.00957657	0.00647374	0.0134654	0.0101065
CGCCG	0.00701889	0.00451068	0.00456302	0.00260767	0.00403254	0.006843	0.00535792	0.00378256	0.00296159	0.00321322	0.0043541	0.00630534	0.00406826	0.00610646	0.00402779	0.00344655	0.00399301	0.00430624	0.00281086	0.00526008	0.00505618	0.00276391	0.00273869	0.0047283	0.00512692	0.00619298	0.00668129	0.00506349	0.00497127	0.00323543	0.00693728	0.00712656	0.00849447	0.00402455	0.00512792	0.00328351	0.00528657	0.00534422	0.00706916	0.00437753	0.00578555	0.00530529	0.00452792	0.00319422	0.00918	0.001216	0.00701113	0.0147708	0.0104594
GCGCC	0.00176363	0.00264722	0.00296472	0.0019792	0.00101258	0.00119782	0.00169561	0.0021977	0.00191081	0.00308142	0.00152115	0.0013821	0.00169778	0.0224133	0.00163971	0.0012152	0.00118459	0.00171331	0.00192491	0.00130924	0.00229133	0.0031106	0.00318064	0.0025551	0.00290194	0.00256963	0.00195564	0.00302331	0.00125902	0.00154386	0.0017901	0.00113504	0.00172988	0.00303139	0.00102879	0.000358904	0.00346302	0.00118264	0.000738695	0.00153035	0.000635147	0.000759894	0.00796817	0.00681426	0.00443136	0.00202214	0.0024317	0.0127367	0.0080002
AGCGC	0.00106534	0.000326966	0.000498763	0.000187712	0.000239486	0.000839752	0.000782259	0.000265156	0.000296491	0.000307179	0.000670386	0.000573847	0.000370296	0.000989729	0.000291618	9.72645e-05	0.000602681	0.000561177	0.000487085	0.000426824	0.0197632	0.000222107	0.000140428	0.000780463	0.000946965	0.000881941	0.000818856	0.00141776	0.000296063	0.000284407	0.000873472	0.000483259	0.000932038	0.000695453	0.000759862	0.000285666	0.000843495	0.000676729	0.000705464	0.00136898	0.000689496	0.00123171	0.00147712	0.000519619	0.00133258	0.000411821	0.00138639	0.00643641	0.00351448
AAGCG	0.00123962	0.000395847	0.000623032	0.000303364	0.000760912	0.000597802	0.0009853	0.000476134	0.000763171	0.000401907	0.000239009	0.000734785	0.000744186	0.00114651	0.000390736	0.00113025	0.000501322	0.000211992	0.000611385	0.00136737	0.00131681	0.00032781	8.23812e-05	0.0011722	0.00220666	0.00116044	0.00104808	0.00180453	0.000239992	0.000192667	0.00180461	0.000406682	0.00116424	0.00107141	0.0007248	0.000776964	0.00174786	0.000430631	0.000177253	0.00105278	0.000399569	0.000363735	0.00156422	0.000494217	0.00125916	0.000622485	0.00138604	0.00606712	0.00342716
GAAGC	0.00212471	0.0019895	0.00177609	0.00245782	0.0020398	0.00185847	0.00276328	0.00195682	0.00210614	0.00132659	0.00118362	0.00227248	0.00255713	0.00204927	0.00205298	0.00161659	0.00172641	0.00153677	0.00199186	0.00273401	0.00228556	0.00184412	0.00125139	0.0027037	0.0057763	0.00350284	0.00318189	0.00460819	0.00217675	0.00269091	0.00402605	0.00169316	0.00195223	0.00339433	0.00198062	0.00272857	0.00582295	0.00175243	0.00100456	0.00357093	0.00148842	0.00248669	0.000513887	0.00078055	0.000631214	0.00848028	0.00170518	0.00506531	0.0004879
AGAAG	0.0112163	0.00984106	0.0128579	0.012638	0.0133303	0.015736	0.0143779	0.0104849	0.0127276	0.00945046	0.0103254	0.00902152	0.00932453	0.0129454	0.011999	0.00870022	0.0112895	0.0117424	0.0123957	0.0108876	0.0125094	0.0109431	0.0111079	0.0128005	0.0145112	0.0147608	0.0119439	0.0145236	0.0169397	0.015257	0.0179451	0.014164	0.0133581	0.00953674	0.0139983	0.0108058	0.0128322	0.0153795	0.0152047	0.0129654	0.0140803	0.0166335	0.00859818	0.00586315	0.0163608	0.0269942	0.0115332	0.0126954	0.0117367
AAGAA	0.01228	0.0130782	0.0165125	0.0166451	0.0154182	0.0173259	0.0166769	0.0146744	0.0167339	0.0144141	0.0126467	0.0118404	0.0134213	0.0161206	0.0144228	0.0115553	0.0130555	0.0149752	0.0154837	0.0132276	0.01427	0.0157148	0.0156777	0.0153436	0.0167288	0.0162752	0.013802	0.0178779	0.0190105	0.018858	0.0185767	0.0158602	0.0138911	0.0138982	0.0156425	0.0114522	0.0167033	0.0177646	0.0167509	0.0154854	0.0152596	0.0171196	0.0119535	0.00719178	0.0164803	0.0197362	0.0104723	0.0136983	0.0117889
AAAGA	0.00239026	0.00181454	0.00211793	0.00386341	0.00235887	0.00182208	0.00293629	0.00214744	0.00244698	0.00301533	0.00297902	0.00291944	0.00272061	0.00196435	0.00261835	0.00112153	0.00213469	0.00272015	0.00261768	0.0018695	0.00244321	0.00219839	0.00307216	0.00319752	0.00319984	0.00265137	0.00262911	0.00366615	0.00297124	0.00449111	0.00181453	0.00121604	0.00151453	0.00300003	0.00323336	0.00174151	0.00298346	0.00222371	0.00149877	0.00287559	0.00239826	0.00303966	0.00419042	0.00705883	0.00249541	0.00032617	0.00275975	0.00276126	0.00101082
TAAAG	0.00832186	0.00840199	0.00828143	0.00683599	0.0078876	0.00752382	0.00675118	0.0178783	0.00696818	0.00874904	0.00796804	0.0074018	0.00678893	0.00845777	0.00805635	0.0087591	0.00763335	0.009274	0.0077389	0.00730025	0.00792451	0.00931897	0.00865972	0.00836542	0.00700196	0.00775612	0.00643856	0.00629789	0.00748683	0.00753568	0.00835885	0.00914349	0.00848936	0.00612871	0.00694736	0.00769682	0.00696848	0.0165553	0.00828601	0.00677711	0.00694492	0.00712094	0.0145834	0.0148215	0.0108763	0.0101645	0.00873515	0.00307144	0.00740651
GTAAA	0.0105822	0.0100467	0.010064	0.0197258	0.00990075	0.00984634	0.00971559	0.0194908	0.0104036	0.00953483	0.00919853	0.0106905	0.0108915	0.0100672	0.00955063	0.0106353	0.0108721	0.00946631	0.0100649	0.0100754	0.00991161	0.0193699	0.00952921	0.00976698	0.010455	0.0105068	0.0196164	0.00995478	0.0100408	0.00995404	0.0100969	0.0102014	0.0104431	0.0105335	0.0104194	0.0103472	0.0101911	0.0197486	0.0102073	0.0106777	0.010493	0.0103475	0.00726935	0.00613626	0.00895431	0.0102677	0.0112461	0.0108913	0.0106388
GGGTA	0.00212392	0.00144884	0.00228232	0.000936675	0.00157191	0.000791599	0.00123202	0.00128066	0.00203952	0.00239956	0.00111666	0.00211706	0.0015087	0.00194563	0.000931134	0.00208723	0.00139931	0.00168808	0.00188581	0.00164472	0.00100125	0.00144011	0.00145421	0.00111417	0.00172	0.00165027	0.00157896	0.00115414	0.000468639	0.00087126	0.000714666	0.000296257	0.00121021	0.00211157	0.000709452	0.000709132	0.00192566	0.000648049	0.000429725	0.00134289	0.000746208	0.000799811	0.00441382	0.00611395	0.00200207	0.00270591	0.00223644	0.000920881	0.000686665
TGGGT	0.00408251	0.00324203	0.00151877	0.00111473	0.00241116	0.0013073	0.00125501	0.00270028	0.00164639	0.00312693	0.00292119	0.00373964	0.00193733	0.00214733	0.00232097	0.00243774	0.00242818	0.00261403	0.00245033	0.00261876	0.00272351	0.00346454	0.00205358	0.00280718	0.00346184	0.00179522	0.0019031	0.00272084	0.000668062	0.00141921	0.0020774	0.00203133	0.00251752	0.00407513	0.00270166	0.00448428	0.00365961	0.00152763	0.00170373	0.0034816	0.00131534	0.00162734	0.00472019	0.0064235	0.00225136	0.00170939	0.00532538	0.00127818	0.0035986
GTGGG	0.00423161	0.00414797	0.00546946	0.00495408	0.00500623	0.00331993	0.00403764	0.00478759	0.00531013	0.00546197	0.00400042	0.00485466	0.00485455	0.00557539	0.00481395	0.00503715	0.0048456	0.00436465	0.00564797	0.00507863	0.00446602	0.00564807	0.00531144	0.00516262	0.0085136	0.00645819	0.00483776	0.00637643	0.00370921	0.00583121	0.00634758	0.00286892	0.00418085	0.00563095	0.00349338	0.00317875	0.00857326	0.0033684	0.0017675	0.00693668	0.00271523	0.00373855	0.00914995	0.00776234	0.00380053	0.00937181	0.00512922	0.00863475	0.00496464
AGTGG	0.00706557	0.00585682	0.0078084	0.00603375	0.00676924	0.00712669	0.00638984	0.00644985	0.00670361	0.00740441	0.00627487	0.0056162	0.00571466	0.00775726	0.00661549	0.00547715	0.00571785	0.0063754	0.00643746	0.00652797	0.00660303	0.00711287	0.0076037	0.00692231	0.0072972	0.0077025	0.00566044	0.00667834	0.00713084	0.00734026	0.00817885	0.00692382	0.00800276	0.00486186	0.00586637	0.00457427	0.00689324	0.00639699	0.00659726	0.00599062	0.00590498	0.00633693	0.0132219	0.0144213	0.0119863	0.00991264	0.00709412	0.00956036	0.00809242
TAGTG	0.00106606	0.000600569	0.000584116	0.000269376	0.000593244	0.000130247	0.000115789	0.000692955	0.000210566	0.00133491	0.00112742	0.00087758	0.000156375	0.000841293	0.000703548	0.00020448	0.000385215	0.00133226	0.000343402	0.000685248	0.000426889	0.000812075	0.000854659	0.000743651	0.000445019	0.000594613	0.000218136	0.000240667	0	0.000282727	0.000569823	0.000301013	0.00057309	0.000366471	0.000210605	0.000283542	0.00027542	0.000116883	9.73982e-05	0.000539235	0.000115548	0.000183024	0.00396932	0.0055941	0.00203278	0.000558237	0.00123787	0.000635454	0.000651179
GGTAG	0.0021609	0.00143404	0.0014181	0.00131248	0.00134435	0.00123622	0.000804637	0.00177874	0.000736197	0.0021304	0.00178708	0.00107549	0.00109156	0.00152687	0.00135558	0.00140842	0.000589817	0.0017304	0.000962599	0.00113028	0.00103681	0.00210956	0.00159497	0.00125319	0.00113687	0.00164386	0.00110353	0.00183795	0.0012792	0.00145558	0.00140375	0.00176739	0.00142029	0.00105259	0.000778114	0.00111452	0.00128142	0.00111568	0.000538897	0.000828425	0.000784779	0.00135804	0.00390832	0.00563082	0.00218254	8.52706e-05	0.00155884	0.0010218	0.000636424
AGGGT	0.00270636	0.00332399	0.00367269	0.00242318	0.00262196	0.00220725	0.0027714	0.00288351	0.00323304	0.00245051	0.00176083	0.00260092	0.00310207	0.0036382	0.00287514	0.00284007	0.00244585	0.00284467	0.0024753	0.00228097	0.00205919	0.00413861	0.00341587	0.00215219	0.00335339	0.00353795	0.00345387	0.00284002	0.00298216	0.00335336	0.00286915	0.00269754	0.00321256	0.00264854	0.00198441	0.00217581	0.00326565	0.00216523	0.00125873	0.00249396	0.00171384	0.00257478	0.00104098	0.00100011	0.00118195	0.00802378	0.00272956	0.000625836	0.00147108
GAGGG	0.00263883	0.000901828	0.00162005	0.00132818	0.00116221	0.000802358	0.000811429	0.0012639	0.00119087	0.0017689	0.00146417	0.00183122	0.0014836	0.00145769	0.00163644	0.000641778	0.000951342	0.000929676	0.00101459	0.00132505	0.0013855	0.00105394	0.00152044	0.00163575	0.00150214	0.00148066	0.00097807	0.00109546	0.0013822	0.00206502	0.000836277	0.000523226	0.00143366	0.00146723	0.00226855	0.000949896	0.00130905	0.000707377	0.000512179	0.000958486	0.00162506	0.00169045	0.00541549	0.00671422	0.00313764	0.00030955	0.00262934	0.00770183	0.00399071
TGAGG	0.00500061	0.0044705	0.00313149	0.00381738	0.00354648	0.00243464	0.00364844	0.00361648	0.00366319	0.00409439	0.00393388	0.00574856	0.00514895	0.00328422	0.00349334	0.00520656	0.00445364	0.00343645	0.0039206	0.0045604	0.00467749	0.00364974	0.00340356	0.00440474	0.00427556	0.00371596	0.00481835	0.00404471	0.00247114	0.00316638	0.00219104	0.00259671	0.00404778	0.00675239	0.00375429	0.00561418	0.00450098	0.00282568	0.00259483	0.00434702	0.00332428	0.00358192	0.00263014	0.00308261	0.00220118	0.000884182	0.00620857	0.00827449	0.00687058
GTGAG	0.0126145	0.0097606	0.00855506	0.00713871	0.00903355	0.0125843	0.0102017	0.00827058	0.0073505	0.00746296	0.0097152	0.0104719	0.00820888	0.0102217	0.0082567	0.0081182	0.00873734	0.00915134	0.0074538	0.0092785	0.0105531	0.00743936	0.00764774	0.00932784	0.00755617	0.0100525	0.0108573	0.00821064	0.0107607	0.00771281	0.0115772	0.0134508	0.0142591	0.00870847	0.0110041	0.0100054	0.00778836	0.0113446	0.0141631	0.00816512	0.0117887	0.0113278	0.00460898	0.0067065	0.0150126	0.00150454	0.0129314	0.0108489	0.0137958
GGTGA	0.000919127	0.00037182	0.000722618	0.000624881	0.000642683	0.000571637	0.000500477	0.000475506	0.000393014	0.00039075	0.000341069	0.000884036	0.000630924	0.000628887	0.000836394	0.000250563	0.000466504	0.000617272	0.000732345	0.000200205	0.000461481	0.000632673	0.000790022	0.000728688	0.000948524	0.00135698	0.000410418	0.00210287	0.00138558	0.00167409	0.000902917	0.000594861	0.000510847	0.00113792	0.00065611	0.000756775	0.00177733	0.000745669	0.000449194	0.0011969	0.00050185	0.00106033	0.000116642	0.000269526	0.000109847	0.000325083	0.00107659	0.00033798	0.000151
TGGTG	0.00127874	0.000156215	0.000606371	0.00109142	0.000769009	0.000326232	0.000461629	0.000963248	0.000249335	0.00128741	0.000721836	0.000658835	0.00101061	0.000477481	0.000684702	0.00129512	0.000220339	0.000548433	0.000625341	0.00065857	0.00069547	0.000484552	0.000926013	0.000994126	0.000701746	0.000553617	0.000388497	0.000697259	0	0.000296402	0.000471983	8.81286e-05	0.000539286	0.00100448	0.000235789	0.00013942	0.00120905	0.000155459	0.000102023	0.000642949	0.000226938	0.000246437	0.00394442	0.00557201	0.00184626	0.000427655	0.00116029	0.000697458	0.000516774
GTGGT	0.00160926	0.000375277	0.000262049	0.000290396	0.000877291	0.000358973	0.000260882	0.000744126	0.000306188	0.000548342	0.000392698	0.00132881	0.00122192	0.000671535	0.00034451	0.00255422	0.00063811	0.000199478	0.00099435	0.000866469	0.000697028	0.000213602	0.000162133	0.000564845	0.000831945	0.000504644	0.00035127	0.000949344	5.39454e-05	0.000172159	0.000452761	0.000155878	0.000659734	0.000772528	0.000424745	0.000332112	0.00122689	0.000153299	0.000127399	0.000658498	0.000211206	0.000386022	0.000246669	0.000126954	0.000210556	0.000445747	0.00110987	0.000272355	0.000469853
TGTGG	0.0015933	0.000767432	0.000697529	0.00148564	0.000945377	0.00101081	0.00113576	0.00119141	0.000662288	0.00101961	0.000962812	0.00234032	0.00226877	0.00109274	0.000493919	0.00251701	0.000929082	0.000529074	0.00115174	0.000844804	0.00124593	0.000551347	0.0007177	0.0010977	0.00235482	0.000957706	0.00161046	0.0017701	0.000345876	0.00064116	0.00152682	0.000314551	0.000975205	0.0023221	0.00060052	0.000593701	0.00223219	0.000648577	0.000243984	0.00167983	0.000622539	0.000706423	0.000166801	0.000602912	0.000259561	0.000173748	0.00160852	0.000466941	0.000907998
TTGTG	0.00306611	0.00198345	0.00174326	0.00195261	0.00145136	0.00173275	0.00229156	0.00185752	0.0013478	0.00152644	0.00150943	0.0237586	0.00316446	0.00250536	0.00222704	0.00240487	0.00180084	0.00199636	0.00174146	0.00270809	0.00213671	0.00114772	0.000838285	0.00208221	0.0036272	0.00277914	0.00255469	0.00254429	0.000910785	0.00143003	0.00199148	0.00162878	0.00283799	0.00299449	0.00154149	0.000822871	0.00302784	0.000810853	0.00147703	0.00221006	0.00155105	0.00155272	0.00202862	0.00128139	0.00136428	0.00848172	0.00244803	0.00892663	0.00351047
GTTGT	0.00979239	0.00760828	0.00732321	0.00631726	0.00702681	0.00799754	0.00640153	0.00754524	0.0069267	0.00622933	0.00735173	0.00891678	0.00695996	0.00859502	0.00760978	0.00681431	0.00642611	0.00802704	0.00712315	0.00644044	0.00680172	0.00858325	0.00706695	0.00643828	0.00639565	0.00765098	0.00691553	0.00814137	0.0089403	0.00856644	0.00720393	0.0091506	0.00921169	0.00710861	0.00841063	0.00844706	0.007523	0.00826938	0.00880006	0.00728986	0.00845433	0.00898965	0.00553086	0.00446414	0.00875266	0.0113739	0.0103876	0.00964077	0.0103469
GGTTG	0.00724272	0.00703332	0.00534911	0.00591095	0.00553388	0.00367686	0.00391768	0.00693156	0.00613383	0.00554926	0.00583879	0.0078364	0.00611917	0.00673233	0.00640408	0.00618107	0.00507844	0.00667296	0.00665072	0.00538011	0.00529212	0.00869184	0.0060117	0.00530875	0.00696098	0.00666626	0.00521903	0.00774036	0.00635935	0.00831503	0.00516446	0.0058487	0.00622478	0.00723956	0.00557608	0.00781716	0.00796865	0.005114	0.00318822	0.00646675	0.00477427	0.00620035	0.00476454	0.00278634	0.00282485	0.0108331	0.00933789	0.00811775	0.00796134
GGGTT	0.00713524	0.00810087	0.00719067	0.00696477	0.00634675	0.00423673	0.00503491	0.00796251	0.00826609	0.00625807	0.0059094	0.00835478	0.00770237	0.00800739	0.00756363	0.00720309	0.00606536	0.00723186	0.00693944	0.00535958	0.00583462	0.0105833	0.00810152	0.0059228	0.00809912	0.00775899	0.00637505	0.00751587	0.00720341	0.00934235	0.00589995	0.00636509	0.00688494	0.00837652	0.00603338	0.00810656	0.00883959	0.0057386	0.00360258	0.00756256	0.00501776	0.00669344	0.00489393	0.00283148	0.00276857	0.0158875	0.00928857	0.00756821	0.0079252
TTGGG	0.000768097	0.00131561	0.00168277	0.00201971	0.00221643	0.000605307	0.000704296	0.00146472	0.00181088	0.00201016	0.00135777	0.0012051	0.00134261	0.000677417	0.00180137	0.00216434	0.00270371	0.00094723	0.00194734	0.00209871	0.000918411	0.00103088	0.00135483	0.00101403	0.00163518	0.00104865	0.000278531	0.00135161	0.00161782	0.00213788	0.00130471	0.000251914	0.000107542	0.00158789	0.00196024	0.00146525	0.00200298	0.00115543	0.000544409	0.00195601	0.00183487	0.00115725	0.00179012	0.00137645	0.000239466	0.00168204	0.00116078	0.000741911	0.000337291
TTTGG	0.000413808	0.00109226	0.00228145	0.00262114	0.00133942	0.00073174	0.00146133	0.00201927	0.00270184	0.00181512	0.00107413	0.000865069	0.0020877	0.00162206	0.00157101	0.00214768	0.00206719	0.00101746	0.00264546	0.000502456	0.000708271	0.00265157	0.00266334	0.000921431	0.00155966	0.00162745	0.000421962	0.00179008	0.00141959	0.00187889	0.000676096	0.000388571	0.000494386	0.00156942	0.000891714	0.000527627	0.00226095	0.00131776	0.000336813	0.0014644	0.0100562	0.00075882	0.0016176	0.00108802	6.59937e-05	0.000853551	0.000771546	0.000207185	0.000246403
CTTTG	0.000311871	0.00032931	0.000485849	0.00124315	0.000302676	0.000219796	0.000430953	0.000677568	0.000713174	0.000646479	0.000237027	0.000478725	0.000899429	0.000443327	0.000230235	0.000391993	0.000472374	0.00029053	0.000588512	0.000197068	0.000359146	0.00061418	0.000524745	0.000393923	0.00103291	0.000217321	0.000304137	0.00111115	0.000233015	0.000271902	0.000762731	0.000240531	6.49869e-05	0.00091684	0.000500423	0.000162964	0.00127604	0.000363296	0.000114435	0.000826039	0.000334476	9.07564e-05	0.000368706	0.000401492	8.48097e-05	0.000624563	0.00104173	0.000454985	0.000109509
GCTTT	0.0112526	0.0096421	0.00823137	0.0073923	0.00871354	0.0089845	0.00780088	0.00855061	0.00764921	0.00729806	0.00887422	0.0119404	0.00966147	0.00961625	0.00932768	0.0101381	0.0103338	0.0106349	0.00781804	0.0103717	0.0092377	0.00658762	0.00584003	0.00830672	0.00876964	0.00880926	0.00928991	0.0066972	0.00753526	0.00678291	0.0100912	0.0109212	0.011355	0.00870731	0.00980369	0.00934435	0.00796	0.00908887	0.0105672	0.00906335	0.0102897	0.00841146	0.00893635	0.00493349	0.00846848	0.00988662	0.012306	0.0104327	0.0100801
AGCTT	0.00515723	0.00486376	0.0032924	0.00204232	0.00324448	0.00541963	0.00386746	0.00393909	0.00224394	0.00292214	0.00413139	0.0036843	0.00229154	0.00500456	0.00339243	0.00239967	0.00275608	0.00464271	0.00198117	0.00416451	0.00426018	0.00244312	0.00233531	0.00381246	0.00273199	0.00400983	0.00411372	0.00217817	0.00402767	0.00268012	0.0054403	0.00693175	0.00696019	0.00198509	0.00399482	0.00236428	0.0022894	0.00437682	0.00616425	0.00259613	0.00467934	0.0038584	0.00170365	0.00247004	0.00676218	0.000431416	0.00473756	0.00384246	0.00356643
CAGCT	0.000655749	0.000219156	0.000511294	0.00205889	0.00061471	0.000771005	0.000353765	0.0018706	0.000611142	0.00151505	0.000535716	0.000435442	0.000800809	0.000478232	0.000308306	0.00128107	0.00068423	0.000140863	0.00208698	0.000696405	0.00149553	0.000657159	0.000200685	0.00167728	0.000773778	0.000908037	0.00066546	0.00114352	0.0003035	0.000700657	0.000322006	0.000213931	5.42322e-05	0.000515222	0.000157088	0.000164877	0.000776056	0.000753348	0.000224888	0.000438225	0.000180052	0.00036483	0.00193071	0.00124115	0.000209809	0.00375876	0.000969006	0.000242871	0.000100368
CGCAG	0.000578818	0.000497297	0.000892405	0.00112662	0.000791066	0.000693109	0.000598991	0.000707844	0.000817006	0.000452938	0.000660817	0.000549574	0.000800956	0.000859747	0.00102579	0.00049582	0.000598506	0.000866309	0.000629642	0.000335623	0.000552052	0.00155758	0.000668915	0.000562899	0.000916475	0.0010179	0.000415785	0.00212049	0.00185008	0.00159993	0.000849278	0.000865986	0.000160763	0.000923183	0.000716491	0.00101023	0.00148411	0.000857457	0.000464819	0.00124403	0.000692552	0.00132908	0.000171705	0.000228843	0.000693452	0.00906908	0.00116522	0.000286355	0.000497906
CCGCA	0.00243253	0.00176549	0.00144258	0.000937154	0.00179317	0.00157289	0.00117532	0.00154059	0.00105233	0.00153841	0.0019915	0.00285375	0.00242975	0.00192716	0.00150246	0.00262669	0.00217492	0.00320896	0.00166301	0.00251497	0.00133989	0.000777262	0.000937485	0.00131862	0.00268292	0.00156098	0.00207435	0.00122534	0.00118614	0.00139928	0.00197259	0.00152867	0.00205249	0.0029988	0.00166957	0.00109255	0.00292033	0.00149223	0.00182047	0.00375512	0.00176388	0.00211349	0.00134874	0.000626748	0.000572135	0.0013432	0.00378985	0.0015086	0.000718932
AAGCC	0.00532503	0.00432048	0.00477097	0.00510918	0.00347205	0.00357242	0.00454518	0.0045578	0.00384233	0.00434993	0.00355113	0.00774424	0.00705121	0.00507548	0.00453376	0.00513747	0.00477107	0.00502044	0.00434311	0.00569165	0.00349433	0.00357627	0.00394685	0.0036137	0.00610486	0.00581311	0.00684467	0.00359599	0.00240566	0.00284805	0.00445666	0.00379135	0.00516838	0.00524071	0.00348139	0.00248818	0.00630683	0.00349502	0.00348142	0.00515933	0.0035133	0.00285143	0.00646185	0.00249838	0.00168846	0.00232974	0.00528623	0.00894011	0.00402225
CAAGC	0.00146325	0.0012015	0.00196729	0.00166524	0.000681191	0.000802383	0.00116853	0.00181126	0.00170302	0.00185047	0.000794802	0.00176339	0.00167463	0.00185277	0.00107145	0.00107566	0.000883449	0.00064719	0.00183687	0.000964816	0.00127131	0.00240832	0.00241656	0.0014192	0.00224208	0.00201689	0.00148152	0.00191867	0.000987427	0.00136541	0.00132551	0.0007032	0.00121847	0.00168695	0.000806521	0.000294079	0.00253954	0.00107115	0.0004561	0.00126628	0.000555191	0.000568642	0.00291606	0.00132239	0.00131374	0.00166526	0.00123972	0.00589507	0.003539
TCAAG	0.00185761	0.00121677	0.000167465	0.000127686	0.000381737	0.000649217	0.000927412	0.000864421	0.000486288	0.000768915	0.000740399	0.00093313	0.000296706	0.000773525	0.000180533	3.81727e-05	0.000195101	0.00103303	0.000394897	0.000693492	0.000499595	0.000608156	9.65905e-05	0.000412288	0.000281908	0.000944557	0.00103444	0.000173982	0.000614878	0.000588435	0.000268532	0.00105549	0.00152711	0.000375648	0.000478656	0.000380424	4.25022e-05	0.000395625	0.000116453	0.000288936	0.000356707	0.000450029	5.73028e-05	0.000563028	0.000440894	0.000279659	0.00131943	0.00100787	0.000275966
GTCAA	0.00633561	0.00679311	0.00360494	0.00422706	0.00502109	0.00298886	0.00351089	0.00538686	0.00385271	0.00517874	0.00572531	0.00565107	0.00439729	0.0048989	0.0045659	0.00662043	0.0049167	0.00568231	0.00499565	0.00579553	0.00539438	0.00575622	0.00414429	0.00548066	0.00352508	0.00474011	0.00554359	0.0040898	0.00438535	0.00563906	0.00294294	0.00533189	0.00647029	0.00477844	0.00462552	0.00686674	0.0038076	0.00388271	0.00321846	0.004115	0.00428129	0.0046324	0.00441471	0.00307988	0.00256368	0.00127107	0.00869887	0.00723738	0.00704479
GGTCA	0.00664473	0.00547729	0.00399107	0.00370533	0.00458513	0.00574485	0.00506735	0.00435098	0.00421198	0.00423005	0.00518806	0.00477085	0.00402916	0.00456569	0.00416155	0.00474819	0.00433077	0.00387023	0.00423471	0.00429467	0.00541988	0.00439522	0.0043425	0.00489525	0.00272118	0.0042435	0.00510384	0.00375465	0.00553909	0.00409777	0.00462641	0.00661257	0.00689571	0.00440262	0.00590958	0.00654957	0.00327622	0.00593624	0.00707088	0.00375649	0.00621779	0.00558159	0.00141524	0.00345581	0.00692125	0.00598823	0.00703082	0.00169709	0.00629007
TGGTC	0.00364447	0.0042559	0.00253352	0.00394769	0.00365754	0.0018312	0.0028899	0.00361996	0.00357839	0.00359118	0.0036948	0.00394268	0.00411942	0.00209616	0.00367384	0.00614118	0.00500225	0.00269334	0.00435803	0.00349111	0.00365287	0.00360791	0.00338219	0.00351315	0.00378547	0.00300833	0.00392294	0.00407247	0.00264179	0.00310629	0.00228303	0.00238028	0.00322716	0.00539072	0.00334441	0.00536287	0.0045968	0.00299406	0.00231155	0.00473487	0.00344575	0.00281211	0.00101927	0.0018962	0.000369587	0.000678934	0.00509448	0.00140085	0.00304669
ATGGT	0.00300243	0.00225061	0.000308129	0.000755048	0.00149219	0.000732568	0.000925414	0.00185102	0.00090899	0.00135805	0.00196002	0.00286664	0.00102824	0.0013636	0.00147741	0.00177744	0.00129922	0.0021357	0.000990975	0.00208268	0.00147312	0.0022498	0.000560562	0.00173175	0.00206631	0.00112541	0.00152605	0.00215245	0.000346265	0.000376524	0.000895086	0.00171785	0.00238839	0.00295523	0.000914472	0.00333919	0.00240105	0.000807971	0.0011749	0.0116111	0.000696853	0.00050381	0.000746085	0.000537902	0.000191426	0.000522124	0.00397371	0.000547853	0.00251294
CATGG	0.00104185	0.00101435	0.00244374	0.00287699	0.0015426	0.00113942	0.0014686	0.00214388	0.00282181	0.00161958	0.001264	0.00119311	0.00219727	0.00215847	0.00191527	0.00123137	0.00114096	0.00204846	0.0025028	0.000349008	0.00105446	0.0034438	0.00299373	0.00129081	0.00185578	0.00208108	0.00107972	0.00364149	0.0027009	0.00369821	0.00124442	0.000949345	0.000687779	0.00246531	0.00138243	0.00122827	0.00268278	0.00184105	0.000764326	0.00244768	0.00133792	0.00215978	0.00315328	0.000712958	0.000596299	0.00963575	0.00133584	0.000343862	0.000514595
TCATG	0.00145213	0.000914406	0.00068021	0.000372655	0.000661115	0.000307239	0.000343694	0.000644454	0.000832841	0.00075768	0.0199612	0.00283572	0.00144202	0.00085991	0.000571097	0.000317964	0.000718502	0.00030366	0.000846667	0.000564957	0.00095918	0.00090711	0.000485376	0.00111716	0.00165433	0.000818924	0.000841629	0.000457098	0.00991785	0.000400318	0.00101768	0.000356198	0.000769462	0.00259233	0.000698664	0.000735878	0.00099931	0.000721549	0.000246948	0.00129175	0.000466376	0.000773462	0.000120242	0.000408038	0.000247817	4.899e-05	0.00121169	0.000360627	0.000589309
CTCAT	0.00150388	0.000660393	0.000862034	0.000345866	0.000821651	0.000238283	0.000351088	0.000883241	0.000682987	0.00141914	0.00116927	0.00270024	0.00108417	0.000757675	0.000761885	0.000367628	0.000655901	0.000766896	0.000541296	0.000615905	0.000855827	0.000719204	0.00103552	0.00117449	0.00143664	0.00101537	0.000701094	0.000383169	0.000105077	0.000354175	0.000332229	0.000111813	0.000699915	0.00124201	0.000456576	0.000508078	0.000702921	0.000263415	0.000220027	0.000868089	0.000143927	0.000366271	0.00379643	0.00584717	0.0018955	0.000329559	0.00115202	0.000906268	0.000585554
GCTCA	0.000923127	0.00064851	0.000233332	0.000196603	0.000378046	0.000178993	0.000268694	0.000286783	0.000144137	0.000356177	0.000265054	0.000786702	0.000220826	0.000387036	0.000118974	0.00020889	0.000575908	0.000170177	0.000200783	0.000201452	0.00051279	0.000352028	0.000121718	0.000460721	0.000411327	0.000787616	0.000513387	0.000264816	3.93836e-05	9.41104e-05	0.000121485	0.000223939	0.00059676	0.000530147	0.000340876	0.000349967	0.000570562	0.000198119	0.000178833	0.00032702	0.000173279	0.000499728	6.3234e-05	0.000304424	0.000159183	0.000151474	0.00105342	0.000180525	0.000442467
CGCTC	0.000896493	0.000409013	0.00028774	0.000948689	0.000339225	0.000141645	0.00047872	0.000434952	0.000219875	0.000729166	0.000195082	0.000648127	0.000573349	0.000272995	0.00014888	0.000208793	0.000641936	0.000111295	0.000200067	0.000292808	0.0195998	0.000249232	0.000151773	0.000524993	0.000554871	0.000915202	0.000490106	0.000390796	3.59323e-05	0.000146094	0.000228658	7.59888e-05	0.000493719	0.00135289	0.000300809	0.000540196	0.000585462	0.000223693	0.000283116	0.00053042	0.000182152	0.000335469	5.19818e-05	0.000398472	0.000109838	0.000112143	0.000896581	0.000279049	0.000105547
TCGCT	0.0027811	0.0011614	0.00176245	0.0022986	0.00144069	0.00152506	0.00200161	0.00131855	0.00151746	0.00140376	0.00103555	0.0023441	0.00157634	0.00196363	0.00134174	0.000693	0.00175222	0.000436447	0.00119444	0.00199178	0.00233509	0.00190418	0.000778096	0.00257653	0.00320298	0.00377189	0.00274588	0.00305737	0.00149283	0.00117842	0.00296453	0.00170685	0.00268052	0.00218518	0.00137154	0.00135695	0.00349642	0.00152833	0.00074457	0.00153595	0.000937242	0.00160462	0.00170615	0.00076817	0.00140738	0.00812219	0.00246076	0.00765475	0.00351793
TTCGC	0.00337216	0.00177249	0.00153348	0.00204511	0.00170053	0.00130247	0.00210236	0.00160411	0.00170175	0.00149181	0.0015376	0.0047153	0.00316409	0.00190002	0.0021513	0.00274028	0.00233541	0.00246686	0.00169946	0.0029308	0.00155014	0.0201143	0.000868346	0.00142161	0.0032014	0.00277432	0.00250931	0.00188602	0.000527648	0.00134299	0.00207688	0.00168162	0.00300654	0.00229763	0.00117658	0.000997476	0.00208439	0.00105648	0.00119985	0.00213832	0.001566	0.00111357	0.00283177	0.000940531	0.000273451	0.000349325	0.00430607	0.000827353	0.000402178
TTTCG	0.00892677	0.00624866	0.00780826	0.00731537	0.00800728	0.00847099	0.00754382	0.00668694	0.00680271	0.00718026	0.0077103	0.00825012	0.00675677	0.00795202	0.0082741	0.00640623	0.0075964	0.00949699	0.00632179	0.00732155	0.00712366	0.00567817	0.00678548	0.00706187	0.00763336	0.00844886	0.00673029	0.00742429	0.00747182	0.00776511	0.00952371	0.00847781	0.00917926	0.00525522	0.00846059	0.00590977	0.00675031	0.00826915	0.0105496	0.00688876	0.00989254	0.00862632	0.0123361	0.0139821	0.0108913	0.000633987	0.00931931	0.00569356	0.00496676
CTTTC	0.0123713	0.00885262	0.01018	0.00869286	0.0110925	0.0130891	0.0103822	0.00860602	0.00835666	0.00831686	0.00987254	0.00976113	0.00826528	0.0116131	0.0101065	0.00847371	0.00918022	0.0117027	0.00818703	0.00981731	0.0100097	0.00824921	0.00857856	0.00912667	0.00934239	0.0108408	0.00881679	0.00956866	0.0112651	0.0103299	0.0140641	0.0134538	0.0140517	0.00603044	0.0117447	0.00765393	0.00772223	0.0119994	0.0160082	0.00874673	0.0138471	0.0120069	0.0109827	0.0107373	0.016745	0.0169318	0.0134393	0.0115804	0.0114294
CTCTT	0.00368466	0.00161475	0.00354337	0.00453002	0.00288116	0.00529435	0.00502282	0.00196055	0.00266414	0.00245249	0.00329007	0.0217016	0.00300054	0.00347646	0.00309761	0.00111859	0.00232149	0.00197216	0.00224822	0.00172448	0.0132489	0.00170318	0.00379033	0.00313241	0.00241169	0.00361705	0.00399579	0.00347158	0.00575882	0.00484102	0.00442033	0.00407494	0.00461167	0.00219856	0.00475906	0.00248781	0.00226569	0.00428881	0.00543039	0.00291295	0.00495021	0.00461594	0.00575377	0.00915123	0.00930761	0.000450574	0.00407867	0.00817182	0.00696501
CCTCT	0.00129837	0.000830269	0.00102964	0.00223201	0.00123224	0.000857073	0.00122908	0.00114967	0.000716071	0.000741324	0.00117563	0.00112601	0.00248279	0.00104463	0.00246055	0.000725952	0.00116033	0.000144518	0.00061517	0.00116827	0.00120067	0.0013245	0.00163928	0.00104797	0.00104264	0.00182876	0.0019989	0.000928599	0.00233757	0.00296295	0.000639307	0.000328202	0.000955141	0.00100971	0.00407515	0.000815768	0.0011651	0.000505991	0.000548716	0.000641232	0.00124923	0.00133237	0.00160709	0.00221104	0.00126608	0.000222916	0.00168918	0.00717643	0.00339389
ACCTC	0.00127545	0.000287331	0.00124248	0.000446578	0.000352009	0.000468475	0.000757806	0.000428033	0.000587502	0.00128573	0.000775647	0.00097429	0.00143256	0.00110962	0.0015317	0.000385425	0.000235557	0.000842921	0.000290617	0.000484294	0.000722262	0.00159067	0.00205647	0.00103869	0.00095256	0.000828531	0.000517963	0.000868489	0.000654244	0.000964524	0.000538284	0.000320882	0.00089298	0.000954263	0.000572984	3.73454e-05	0.000924891	0.00026465	0.000129253	0.000422082	0.000172061	0.000253393	0.00521495	0.00626697	0.00319159	0.000489596	0.00140349	0.00752602	0.00389035
AACCT	0.0047997	0.00233414	0.00287668	0.0208551	0.00244871	0.0052247	0.00390898	0.0023619	0.00225769	0.00170854	0.00232679	0.00196541	0.00159193	0.00452589	0.00226691	0.000910435	0.0017844	0.00331161	0.00156481	0.00198132	0.00320299	0.00185501	0.00237823	0.00293089	0.00275396	0.00363176	0.00295993	0.00357809	0.00489037	0.00416467	0.00514899	0.0049385	0.00507749	0.00204633	0.00415937	0.00255469	0.00238706	0.00420976	0.00536273	0.0109276	0.00414356	0.00509618	0.00190899	0.00244947	0.00846231	0.00331398	0.00378845	0.00881096	0.00722923
AAACC	0.00536308	0.00257599	0.00310091	0.0115404	0.0028379	0.00565934	0.0041133	0.00285683	0.00239888	0.00190809	0.00244578	0.00253182	0.00221269	0.00440431	0.00215832	0.00215206	0.00232976	0.00219935	0.00165973	0.00253448	0.00418209	0.00193506	0.00190874	0.00362	0.00292366	0.00446909	0.00469761	0.00322139	0.0046027	0.00279767	0.00527403	0.00544678	0.0061798	0.00230934	0.00398047	0.00299588	0.00233574	0.00430248	0.0052017	0.00291871	0.00391763	0.00415349	0.00205958	0.00241448	0.0080036	0.00774894	0.00418681	0.00868302	0.00692548
TAAAC	0.00448331	0.00458917	0.00331684	0.0147492	0.00392675	0.00303523	0.00362178	0.00416827	0.00397487	0.00378374	0.00414926	0.00564906	0.00510289	0.00343396	0.00406444	0.0046059	0.00411311	0.00288718	0.00410669	0.00391123	0.00462319	0.00500261	0.00361073	0.00439813	0.00436388	0.00417164	0.00465049	0.00534314	0.0035678	0.00391941	0.00306932	0.00366123	0.00390454	0.00616602	0.00419133	0.00627054	0.0050296	0.00373948	0.0026648	0.00488684	0.00372784	0.00414377	0.00255495	0.0024186	0.00171088	0.000519821	0.00600696	0.00808817	0.00677346
TGTAA	0.00890683	0.00926859	0.0183125	0.00928298	0.00864396	0.00847622	0.00828602	0.00918462	0.00934777	0.00926322	0.00903855	0.00907365	0.00843476	0.00921255	0.00901917	0.00799662	0.00822547	0.0080577	0.00877976	0.0086267	0.00948777	0.00954508	0.00941677	0.00968704	0.00895801	0.00914116	0.0089289	0.0102462	0.00941569	0.00961332	0.00936988	0.0091845	0.00988936	0.00923348	0.0092302	0.0094287	0.00942716	0.00906985	0.0081707	0.0088561	0.00856482	0.00866385	0.0103432	0.0104614	0.0104032	0.0103911	0.0100724	0.0103249	0.0108217
TTGTA	0.0111359	0.0105017	0.0080069	0.00907786	0.00900864	0.00840748	0.00801083	0.0094708	0.0093304	0.00796706	0.00941307	0.0108425	0.0187234	0.00938591	0.00869131	0.00892403	0.00829686	0.00834501	0.00903793	0.00931532	0.00961742	0.0105843	0.0089665	0.00940172	0.00840188	0.00882691	0.00940405	0.00951547	0.00991902	0.00995037	0.00838485	0.0101812	0.0108083	0.00933995	0.0107066	0.0122364	0.00858708	0.00931827	0.0090431	0.00830593	0.00988836	0.00943525	0.00741156	0.00579084	0.00880413	0.010234	0.0127959	0.0094856	0.0128802
CGGGT	0.00283069	0.00264374	0.00384335	0.00396143	0.00292134	0.00187341	0.00204809	0.00352298	0.00389882	0.0035679	0.00299398	0.00443706	0.00420677	0.00388868	0.00375923	0.00329259	0.00234362	0.0034375	0.00376781	0.00234667	0.00238368	0.00439327	0.00476288	0.00265234	0.00395884	0.00371867	0.00254489	0.00397528	0.00377807	0.00551939	0.00303308	0.00221965	0.0024273	0.00365296	0.00206555	0.00204489	0.00435988	0.00240558	0.00103544	0.0032314	0.0025362	0.00322865	0.00689536	0.00702057	0.00315056	0.00935637	0.00383923	0.00736642	0.00643497
TCGGG	0.0028837	0.00302335	0.00345088	0.00349523	0.00317227	0.00184807	0.00198069	0.00388888	0.00327078	0.00378793	0.00360363	0.00492627	0.00382602	0.00420688	0.00392879	0.00397293	0.00245908	0.00400273	0.00359977	0.00338475	0.00255112	0.00453069	0.0044049	0.00293654	0.00382709	0.00419074	0.00322776	0.0035647	0.00281089	0.00496861	0.0029511	0.00261837	0.00333098	0.00308601	0.00217488	0.00196564	0.00398038	0.00235917	0.00126154	0.00322055	0.00189877	0.00261757	0.0073098	0.00668191	0.00300889	0.00846694	0.0051914	0.00726288	0.00415541
TTCGG	0.0102599	0.00824981	0.0100292	0.00829701	0.00932888	0.0129057	0.0100285	0.00848063	0.0086682	0.00718077	0.0083253	0.00773369	0.00757192	0.0109804	0.00897003	0.00654065	0.00779464	0.00888652	0.00782559	0.00777591	0.00891948	0.00903817	0.00861789	0.00861536	0.00833003	0.0102953	0.00830989	0.0102408	0.0133113	0.0106883	0.0127453	0.0129369	0.0113972	0.00573062	0.0103128	0.00758706	0.00870988	0.0117141	0.0131667	0.00831711	0.0107427	0.0116878	0.00683045	0.00506092	0.0151537	0.00940663	0.00854754	0.010434	0.0107345
CTTCG	0.00586236	0.0046275	0.00591616	0.00528492	0.00521505	0.00644625	0.00566024	0.00513678	0.0053193	0.00458461	0.0045296	0.00594858	0.00566473	0.00662495	0.00459722	0.00457214	0.00422844	0.00470961	0.00494225	0.00531763	0.00520241	0.00558064	0.00542125	0.00477842	0.00631015	0.00678604	0.00536465	0.00645213	0.00669213	0.00579087	0.00715076	0.00656244	0.00631476	0.00460235	0.00528386	0.00373641	0.00654702	0.00578896	0.00615561	0.00501871	0.0052237	0.00602125	0.0071868	0.00354468	0.00797209	0.00932236	0.00572739	0.00994814	0.00698798
CCTTC	0.00933795	0.00886751	0.011318	0.0116087	0.0102797	0.0107391	0.0103438	0.0102552	0.01165	0.00870923	0.00949929	0.0114387	0.0121526	0.0114747	0.0103719	0.0101529	0.00891858	0.011497	0.0112642	0.0091027	0.00832707	0.0114815	0.011177	0.00835293	0.0115516	0.0118713	0.00983918	0.012151	0.0134777	0.0145126	0.0114511	0.0103128	0.00986394	0.00968531	0.0112626	0.00831718	0.0104069	0.0113449	0.0102381	0.0105563	0.010997	0.0130961	0.0099626	0.00642749	0.00956801	0.0197202	0.0103424	0.0104599	0.00832127
GCCTT	0.00468312	0.00472195	0.0070258	0.00887404	0.00626294	0.00428182	0.00413957	0.00782577	0.00722457	0.00641441	0.00526695	0.00768351	0.00802359	0.00710685	0.00655285	0.00756692	0.00453556	0.00660121	0.00807674	0.00507441	0.0051432	0.00956609	0.00810545	0.00542569	0.00677015	0.0080205	0.00502075	0.00888318	0.00703087	0.00937258	0.00540726	0.00483417	0.00516819	0.00727093	0.00402913	0.00480125	0.00805122	0.0055637	0.0029885	0.00670777	0.00401965	0.00595917	0.00661781	0.00291512	0.00271048	0.0192723	0.00684329	0.00875248	0.0047523
GGCCT	0.00500087	0.00436651	0.00609531	0.00613897	0.00528632	0.00339413	0.00369453	0.00650699	0.00638154	0.00595541	0.0049862	0.00748164	0.00682479	0.0067721	0.00610747	0.00702145	0.00369637	0.00639032	0.00655674	0.00455765	0.00443825	0.00863409	0.00727508	0.00475935	0.00749849	0.00681597	0.00413878	0.00803872	0.00569391	0.00831751	0.00549583	0.00392235	0.00527804	0.00657655	0.00371351	0.00363642	0.00750777	0.00401209	0.00236069	0.00603594	0.00329184	0.00499016	0.00921748	0.00744535	0.0041802	0.0183866	0.00729851	0.00829793	0.00494272
TGAAG	0.00635607	0.00661236	0.00887793	0.00999489	0.00775029	0.00881864	0.00946678	0.00822885	0.010024	0.00732659	0.0070253	0.00808827	0.0102947	0.00768216	0.00735021	0.00725208	0.00657966	0.00693852	0.00849244	0.00639173	0.00655616	0.00781477	0.00914181	0.00702359	0.00832638	0.00770053	0.00765331	0.00829548	0.00987145	0.00978454	0.00821605	0.00739371	0.00669008	0.00739376	0.00892654	0.00596276	0.00737913	0.00906722	0.00848804	0.00768762	0.00903373	0.00879835	0.00599164	0.00527196	0.00751713	0.0105058	0.00435385	0.00336549	0.00403894
ATGAA	0.00181888	0.00269418	0.00272633	0.00390485	0.00299758	0.00242982	0.00349291	0.00266335	0.00360687	0.00296904	0.00275455	0.00391625	0.00495637	0.00216698	0.00272642	0.00300859	0.00323675	0.00256849	0.00304581	0.00249052	0.00285073	0.00249156	0.00284057	0.00309551	0.00508692	0.00344381	0.00404869	0.00478487	0.00293397	0.00376888	0.00368434	0.00192667	0.0014701	0.00612697	0.00301737	0.00323704	0.00472603	0.003216	0.00198033	0.00476225	0.00248218	0.00367183	0.00061113	0.00173094	0.000948676	0.000953834	0.00179806	0.00118041	0.000959354
GATGA	0.00457765	0.00645427	0.00508922	0.00754003	0.0050431	0.00317647	0.00495095	0.00563867	0.00676471	0.00590236	0.00549178	0.0065069	0.00699225	0.00438384	0.00540448	0.00784863	0.00634525	0.00414983	0.00613563	0.00551878	0.00441237	0.00665764	0.00593325	0.00464325	0.00660615	0.00584546	0.00612628	0.00646813	0.00391224	0.00563183	0.00443357	0.00317173	0.00385569	0.00686724	0.00490721	0.00613615	0.00733364	0.00473676	0.00272243	0.00627373	0.00450005	0.00361809	0.00434187	0.00346578	0.00156269	0.00165742	0.00633571	0.00850506	0.00599113
GGATG	0.00407545	0.00414155	0.00209923	0.00384415	0.00238258	0.00197076	0.00311018	0.00285223	0.00340869	0.00226954	0.00323998	0.00488896	0.00391223	0.00227869	0.00299022	0.00350827	0.00311386	0.00165213	0.0034742	0.00262841	0.0029046	0.00370913	0.0029186	0.00274197	0.00376715	0.00322084	0.00394829	0.00371492	0.00226761	0.00293291	0.00235375	0.00226468	0.003153	0.00452594	0.00369874	0.00474836	0.00389648	0.00302859	0.00201573	0.00343514	0.0034299	0.00322931	0.00229849	0.00211343	0.00145624	0.000490519	0.00506215	0.00765055	0.00580428
GGGAT	0.00355645	0.00268011	0.000792012	0.000550154	0.00177049	0.00123638	0.000965699	0.00177217	0.000776526	0.00134744	0.00167476	0.00285397	0.00167192	0.00215646	0.0012362	0.00279898	0.0012826	0.00146696	0.00135741	0.00206891	0.00223054	0.00230546	0.000723204	0.00215499	0.00211728	0.0015766	0.00171557	0.00200153	0.000408411	0.000550355	0.00139183	0.00192375	0.00301652	0.0020328	0.00131253	0.00320343	0.00243974	0.000763752	0.00148952	0.00211086	0.000834441	0.00142242	0.0022184	0.000820487	0.00160207	6.68942e-05	0.00438036	0.00725466	0.00637085
AGGGA	0.0114859	0.00864914	0.00953432	0.0074242	0.007461	0.013048	0.0108397	0.00772882	0.0091701	0.00590447	0.00769896	0.00812882	0.00734401	0.00977094	0.00824166	0.00576569	0.00680998	0.00841997	0.00747126	0.00579071	0.00826008	0.00899801	0.00886895	0.00752264	0.00657749	0.00907709	0.00990052	0.0076824	0.0106805	0.00656833	0.010418	0.0134482	0.0122644	0.00472298	0.010552	0.010347	0.00651311	0.0119775	0.0144482	0.00648182	0.0125889	0.0102492	0.00774121	0.00628455	0.0157875	0.00186358	0.00996809	0.0161284	0.0180944
CGTGA	0.00778068	0.00599162	0.00559401	0.00597344	0.00582562	0.00836689	0.00792838	0.00533319	0.00471464	0.00482367	0.00678442	0.00687741	0.00587031	0.00687324	0.00544062	0.00569945	0.00566831	0.00674463	0.00497746	0.00633767	0.00671534	0.00434788	0.00533464	0.00670101	0.00524042	0.00732462	0.00895046	0.0066808	0.00770435	0.0062202	0.00726935	0.00850588	0.00975591	0.0042209	0.00682497	0.00485792	0.00514022	0.00727423	0.00838787	0.00573316	0.00743471	0.00791999	0.00334848	0.00375395	0.00868602	0.000797604	0.00930425	0.00944513	0.00754294
GCGTG	0.00941173	0.00905028	0.00952222	0.00877799	0.00863187	0.00961422	0.0287113	0.00889723	0.00856324	0.00842184	0.00915213	0.00980666	0.00979167	0.00917058	0.00830425	0.00936839	0.00911005	0.00907087	0.00923159	0.00879135	0.00866828	0.00898755	0.00917449	0.00842292	0.00883255	0.00941214	0.0102358	0.00948449	0.0103237	0.00978603	0.0088035	0.0101071	0.0105171	0.0102674	0.0100598	0.00980138	0.00944638	0.0100224	0.0107766	0.0104745	0.0102681	0.010889	0.00730948	0.00598115	0.00896024	0.0104749	0.0117573	0.0102827	0.010414
CGCGT	0.0066615	0.00605922	0.00796918	0.00722421	0.00611522	0.00849267	0.0378963	0.00633813	0.00656854	0.00629591	0.00642158	0.00707649	0.0071692	0.00759038	0.0255112	0.0250878	0.00650235	0.0258216	0.00653795	0.00627254	0.00654768	0.00606976	0.0269653	0.00659177	0.00810767	0.00828162	0.00876551	0.00895019	0.00816861	0.00748188	0.00828285	0.00803913	0.00832567	0.00848326	0.00694889	0.00499834	0.00862002	0.00796492	0.00844701	0.00823503	0.00758914	0.00795839	0.00629999	0.00459699	0.00870106	0.0102351	0.00696477	0.00995805	0.00753754
ACGCC	0.006358	0.00444748	0.00435328	0.00255122	0.00407903	0.00654389	0.00509344	0.00375696	0.0029061	0.00321889	0.00437748	0.00597265	0.00397584	0.00548039	0.00387226	0.003464	0.00399642	0.00431104	0.00268484	0.00511551	0.00456077	0.00260589	0.00272685	0.00434527	0.00456608	0.00557409	0.00653963	0.00431126	0.0048852	0.00341825	0.00652804	0.00694317	0.00771669	0.0038914	0.00498764	0.00327652	0.00471557	0.00520856	0.00705121	0.00452569	0.00572254	0.00542974	0.00317076	0.00291067	0.00802231	0.000967896	0.0060034	0.00920431	0.00711031
GACGC	0.00221483	0.00137201	0.0020975	0.00138479	0.00128952	0.00191641	0.00173027	0.00150105	0.00171426	0.00118989	0.00153444	0.00168845	0.00157397	0.00184486	0.001403	0.000753285	0.00192886	0.0201902	0.00143251	0.001165	0.00168065	0.00172435	0.000852252	0.00216225	0.00204674	0.00303656	0.0025136	0.00298978	0.00268764	0.00226711	0.00202143	0.00178062	0.00231925	0.00188091	0.00158314	0.00162304	0.00331078	0.001908	0.00139775	0.00214857	0.00164465	0.00296152	0.00172852	0.00130498	0.00197658	0.000320209	0.0021074	0.00821217	0.00400674
CGACG	0.0018647	0.000925344	0.000957743	0.000464967	0.00107025	0.000866561	0.00131128	0.00108665	0.00110883	0.00111127	0.000630466	0.00148654	0.000957906	0.00189674	0.000891232	0.000377494	0.00109441	0.000500839	0.000736486	0.00211414	0.00249186	0.000591631	0.000341855	0.00234896	0.00304165	0.00223944	0.00207987	0.00172231	0.000403763	0.000248616	0.00232208	0.00083781	0.00222573	0.00193879	0.00107453	0.00106503	0.00328942	0.000694793	0.000572069	0.00158187	0.000544031	0.000623298	0.00158097	0.000525306	0.00130363	9.17799e-05	0.00151171	0.00744619	0.00349676
GCGAC	0.00207377	0.00114869	0.00129318	0.00216107	0.00136217	0.00149143	0.00283948	0.00156999	0.00182185	0.00172026	0.00176278	0.00183544	0.00144669	0.00172504	0.00154397	0.000475428	0.00146061	0.000869068	0.00120586	0.00275941	0.00309491	0.000677119	0.0013628	0.00297308	0.00373621	0.00289347	0.0038641	0.00256561	0.000758492	0.000628589	0.002589	0.00115313	0.00261558	0.00286615	0.00163223	0.00151331	0.00363715	0.00139129	0.000799641	0.00222759	0.00117651	0.00100125	0.00167392	0.000948665	0.00133441	0.000156323	0.00194932	0.00776443	0.00352471
CAGCG	0.00201253	0.000772029	0.000846542	0.00042183	0.000474828	0.00106405	0.000988283	0.000676183	0.000551129	0.00069165	0.00106669	0.00145331	0.000925291	0.00145933	0.000608996	0.000437458	0.00117384	0.000423759	0.000624762	0.000984227	0.001555	0.000527159	0.00036597	0.00145965	0.00157248	0.00188641	0.0016914	0.00149886	0.000684314	0.000382164	0.00133536	0.000858633	0.00244712	0.000863741	0.000922693	0.000582704	0.00222376	0.000770327	0.000862804	0.00141006	0.000776874	0.00131482	0.00159174	0.000572272	0.00134038	0.00848407	0.00272422	0.00727893	0.00352714
TGCAG	0.00774027	0.00753647	0.00441614	0.00427946	0.005087	0.00410154	0.00596991	0.00548835	0.00528205	0.00484131	0.00530166	0.00784734	0.00634173	0.00554258	0.0051076	0.00762277	0.00624831	0.00448975	0.00561056	0.00685978	0.00759176	0.00593512	0.00414258	0.00682746	0.00730635	0.0066134	0.0084154	0.00548936	0.00333869	0.00414096	0.00477184	0.00526443	0.00785608	0.00795768	0.00544264	0.00961792	0.00671414	0.00415746	0.00396346	0.00623198	0.00465142	0.00464067	0.00588271	0.00399745	0.00415294	0.00893056	0.00989922	0.0190021	0.0158313
ATGCA	0.00206237	0.00234455	0.00227438	0.00203568	0.00159106	0.00181827	0.00310961	0.00180413	0.0316341	0.0027997	0.00186936	0.00292284	0.00322342	0.00237323	0.00213302	0.00298157	0.00296581	0.00133556	0.00263882	0.00286068	0.00343325	0.00206252	0.00282979	0.00328981	0.00235121	0.00323108	0.00440737	0.00228893	0.00169941	0.00187054	0.0014259	0.00159525	0.0028791	0.00242639	0.00180696	0.00204556	0.00211127	0.00191733	0.00150902	0.00172652	0.00200532	0.00214818	0.00183143	0.00180183	0.0013269	0.00840872	0.00206133	0.00768268	0.00364273
GATGC	0.0018633	0.00181837	0.0016231	0.00191413	0.00122054	0.00179708	0.00318821	0.00146678	0.00179636	0.00195137	0.00149174	0.00231814	0.0025799	0.00207359	0.001821	0.0024479	0.00196552	0.00120612	0.00206526	0.00245483	0.0026068	0.00133428	0.00210185	0.00257938	0.00356756	0.00309674	0.00451673	0.00430725	0.00152746	0.00172741	0.00197287	0.00123046	0.00279214	0.00306511	0.0014389	0.0013344	0.00367267	0.00123285	0.00116956	0.00303853	0.00149979	0.0017326	0.00165015	0.00131253	0.00130908	0.00884014	0.00221447	0.00806818	0.00363369
TGATG	0.00273152	0.00308627	0.00326807	0.00372804	0.00303927	0.0019533	0.00316473	0.00426893	0.00351012	0.00381385	0.00285327	0.0051568	0.00503212	0.00428216	0.00377286	0.00484951	0.00286178	0.00322685	0.00354718	0.00404015	0.00304084	0.00319485	0.0032234	0.00302458	0.00497089	0.00419439	0.0040692	0.00431632	0.00205117	0.0034358	0.00279754	0.00185382	0.00342772	0.00495613	0.00209214	0.00239817	0.00507549	0.00174746	0.00142112	0.00401411	0.00174624	0.00258582	0.00356668	0.0020263	0.00219603	0.00933229	0.00358985	0.00780894	0.00433447
CTGAT	0.0026947	0.00362509	0.00500326	0.00584471	0.0041546	0.00283122	0.00429751	0.00570886	0.00634122	0.00513076	0.00271168	0.00424613	0.00549068	0.00477022	0.00392453	0.00531655	0.00440312	0.0121345	0.00570209	0.00464392	0.00432658	0.00440029	0.00387781	0.00487694	0.006575	0.00548628	0.00452851	0.0143707	0.00290508	0.00397727	0.00412763	0.00181703	0.00389333	0.00543521	0.00278136	0.00237567	0.00726598	0.00303951	0.00131739	0.00485289	0.00216732	0.00229198	0.00567285	0.0022033	0.00138175	0.0102771	0.00186021	0.00809794	0.0035903
CCTGA	0.00539823	0.00784592	0.00818951	0.00896869	0.00521749	0.00480726	0.00678297	0.00857433	0.0084258	0.00737855	0.00544736	0.00765034	0.00919459	0.00840385	0.00649738	0.00659138	0.00568837	0.0064307	0.00778521	0.00507915	0.0067203	0.00968159	0.0100309	0.00697602	0.007276	0.00740592	0.00745085	0.00648249	0.00587772	0.00708835	0.00525983	0.00547332	0.00682691	0.00698872	0.00481129	0.00448185	0.00788245	0.00559081	0.00318715	0.00591476	0.00404025	0.00447291	0.00846302	0.00341827	0.00237223	0.0100726	0.00575165	0.0084077	0.00575827
GCCTG	0.00385056	0.00418493	0.00385864	0.00425685	0.00281233	0.00248115	0.00384325	0.00381365	0.00341145	0.00452452	0.00343186	0.00535842	0.00539874	0.00397402	0.00331205	0.00387286	0.00313137	0.00378463	0.0036635	0.00341666	0.0039847	0.0039203	0.00475382	0.00401648	0.00502675	0.00339148	0.00440377	0.00434894	0.00188444	0.00263994	0.00302483	0.00247363	0.00340428	0.00489958	0.00258575	0.00231327	0.00454581	0.00252493	0.00216141	0.00390063	0.00237318	0.00194477	0.0089454	0.00754083	0.00340204	0.0018823	0.00434058	0.00848869	0.00502764
AGCCT	0.00350574	0.00448207	0.00369943	0.00577425	0.00281122	0.00269087	0.00390342	0.00442316	0.00334303	0.00421952	0.00320264	0.00557029	0.00583431	0.0041605	0.00311729	0.00395561	0.00323229	0.00378592	0.00441932	0.00374084	0.00430418	0.00398771	0.0050147	0.00431688	0.00425211	0.00361756	0.00439906	0.00396757	0.00186794	0.00299984	0.00246726	0.00241983	0.00346702	0.00482065	0.00254297	0.0023615	0.0041852	0.00278311	0.00226376	0.00380618	0.00234847	0.00205439	0.00599537	0.00251149	0.00163824	0.00255966	0.0041022	0.0080368	0.00459647
GGCGA	0.00312319	0.00187843	0.00147867	0.00247961	0.0021626	0.00167915	0.00267098	0.00224824	0.00173931	0.00208544	0.00231537	0.0045679	0.00347038	0.00177713	0.00228232	0.00270242	0.00217275	0.00259244	0.00176295	0.00337152	0.00289163	0.00100441	0.00155674	0.00237686	0.00232643	0.00171303	0.00267284	0.0016374	0.000737008	0.00083498	0.00125299	0.00175552	0.0029312	0.00257642	0.00178082	0.00188566	0.00167574	0.00136762	0.00155279	0.00173987	0.00189216	0.00122471	0.00230888	0.000857794	0.000409096	0.000893107	0.00369304	0.00115846	0.000656113
GGGCG	0.00342311	0.00411959	0.0033425	0.005068	0.00253455	0.00233076	0.00391082	0.00373798	0.00373015	0.00402698	0.00290611	0.00541097	0.00592824	0.00377974	0.0028627	0.00399036	0.0032364	0.00338534	0.00360018	0.00400912	0.00407957	0.00340442	0.00406756	0.00390354	0.00423159	0.00336539	0.00421088	0.00347461	0.00185433	0.00206982	0.00247903	0.00237762	0.00348738	0.0049942	0.00243607	0.00225061	0.00426477	0.00252355	0.00221996	0.00370451	0.0023746	0.0017701	0.00520195	0.00186268	0.00170688	0.00184714	0.00414879	0.00813073	0.00465211
TGGGC	0.00342399	0.00404469	0.00337581	0.00411431	0.00253895	0.00232136	0.00369578	0.00344447	0.00342589	0.00357986	0.00277193	0.00539052	0.00539695	0.0037802	0.00283623	0.00402277	0.00327592	0.00319313	0.00356155	0.00365621	0.00376394	0.00338231	0.00394252	0.00352552	0.00427121	0.00341135	0.00433346	0.00339945	0.00187642	0.00220161	0.00290734	0.00233428	0.00338377	0.00487488	0.00244703	0.00218491	0.00443635	0.00253459	0.00208017	0.00419932	0.00226011	0.00182951	0.00531606	0.00219134	0.00162766	0.00190616	0.00417913	0.00802162	0.00464043
ATGGG	0.00943726	0.0109481	0.00604027	0.00703622	0.00655742	0.00521645	0.00635802	0.00838425	0.00688996	0.00741941	0.00719746	0.0110315	0.00850611	0.00802308	0.00666068	0.00847258	0.00730513	0.00802169	0.00713361	0.00793577	0.00861181	0.0100785	0.00741918	0.00847527	0.00921027	0.0172971	0.00868868	0.00773645	0.00470754	0.00531871	0.00608559	0.00820523	0.00967366	0.0102356	0.00543873	0.0108763	0.00898763	0.00568823	0.00541195	0.00747387	0.00460148	0.00521276	0.00708965	0.00312855	0.00270917	0.00935448	0.0116157	0.00905207	0.0108793
AATGG	0.0098948	0.010236	0.00998772	0.00997244	0.010182	0.0197944	0.0100166	0.0100726	0.0100922	0.010361	0.0102445	0.0101541	0.0100546	0.0198353	0.00997951	0.0101806	0.0200416	0.00977679	0.00982338	0.0106324	0.0104019	0.00989589	0.00985444	0.0104546	0.0108963	0.0206174	0.0106725	0.0105311	0.0102639	0.0102057	0.01047	0.0103511	0.0104231	0.011402	0.0100027	0.0105746	0.0109345	0.0103452	0.0196964	0.0203133	0.0100955	0.0104245	0.0111832	0.0113507	0.0107678	0.0101984	0.0107217	0.0114366	0.0107738
ACAAT	0.00490575	0.00502343	0.00605895	0.00683889	0.00531274	0.00380003	0.00626288	0.00556869	0.00675264	0.00640187	0.00529004	0.00540856	0.0162228	0.00482067	0.00551927	0.00486771	0.00612171	0.00530749	0.00611633	0.00687061	0.00618059	0.00449644	0.00625912	0.00649129	0.0083101	0.00586392	0.00635688	0.00605052	0.00314228	0.00415381	0.00549602	0.00278452	0.00460292	0.00700048	0.00568566	0.00326568	0.00698532	0.00406099	0.00279879	0.00613223	0.00454328	0.00339839	0.0107039	0.00773908	0.00356828	0.0099771	0.00419664	0.00923175	0.00439055
GCACA	0.00231154	0.00301948	0.00218147	0.00196495	0.00238112	0.00180576	0.00282014	0.00237105	0.00267554	0.0029198	0.00187536	0.00289758	0.00276946	0.00268525	0.00268524	0.00261141	0.00375248	0.0013544	0.002881	0.00298516	0.00333186	0.0016388	0.00161257	0.00323238	0.00437907	0.00340047	0.00298791	0.00273899	0.00146851	0.00192347	0.00291282	0.00155777	0.00234974	0.00333162	0.00188732	0.00209348	0.00362027	0.00164162	0.00108874	0.00296448	0.0016304	0.00163292	0.00180072	0.00126084	0.00178762	0.00916554	0.00165814	0.00787662	0.00384276
TGCAC	0.00526245	0.0064098	0.00432414	0.0047845	0.00591977	0.00324263	0.00465776	0.0055968	0.00558163	0.00600646	0.00445717	0.00602263	0.00580553	0.00425034	0.00589727	0.00768712	0.00768454	0.00338191	0.00600522	0.0061853	0.00670964	0.00494905	0.00382616	0.00647885	0.00777264	0.00583239	0.0049162	0.00574435	0.00371537	0.00461209	0.00560013	0.00347406	0.00439009	0.00737316	0.00518539	0.00757475	0.00705811	0.00385788	0.00283405	0.00652833	0.00412945	0.00389456	0.00290248	0.00252738	0.00170156	0.00914335	0.00529581	0.0092287	0.00644082
TTGCA	0.00415564	0.00434494	0.00245231	0.00167305	0.00304722	0.00203842	0.00289398	0.00299454	0.0122752	0.00361762	0.00258385	0.00496798	0.00399183	0.00313183	0.00283101	0.00531383	0.00357169	0.00260501	0.00352524	0.00472172	0.00395453	0.00396986	0.00232141	0.0041538	0.00394075	0.00345304	0.00405419	0.00233636	0.00142161	0.00189115	0.00181674	0.00281619	0.00416859	0.00412405	0.00196113	0.00471736	0.00376887	0.00182357	0.00247961	0.00333261	0.00193957	0.00228418	0.00247741	0.00225077	0.00169455	0.00843957	0.00484702	0.00794881	0.00638781
ATTGC	0.00659673	0.0065486	0.00681595	0.00585199	0.00781352	0.00852879	0.00733905	0.00599372	0.0151297	0.00595979	0.00623865	0.00597397	0.00587773	0.00797465	0.00683209	0.00651158	0.00682991	0.00697541	0.0060721	0.00770322	0.00730649	0.00575179	0.00475049	0.00717476	0.00872332	0.00834322	0.00666735	0.00869082	0.00866367	0.00761529	0.00914919	0.00856686	0.00750601	0.00667244	0.00696925	0.00668508	0.00740221	0.00758998	0.00849488	0.00799916	0.00725967	0.0085241	0.00357499	0.00322015	0.0092938	0.00929881	0.00641071	0.0101603	0.00819676
TATTG	0.00504207	0.00730892	0.00578487	0.00655412	0.00682752	0.00397798	0.00555941	0.00621079	0.00623434	0.00729771	0.00626929	0.00595598	0.00658331	0.0052228	0.00708174	0.00736096	0.00741597	0.0060434	0.00709985	0.00729233	0.00727526	0.00677145	0.00612326	0.00728723	0.00804657	0.00655537	0.00727284	0.00778989	0.00543832	0.00670227	0.00544166	0.00456951	0.00503818	0.00806266	0.00712199	0.00851192	0.00826551	0.00494872	0.00396001	0.00741565	0.0144186	0.00641473	0.00816127	0.00813639	0.00454215	0.00944287	0.00612974	0.00963949	0.00787943
ATATT	0.00971727	0.0124114	0.00950673	0.0119832	0.0116882	0.00779403	0.0100464	0.0111937	0.0111312	0.0112887	0.0197057	0.0118602	0.0117081	0.0183746	0.0113149	0.0134676	0.0134979	0.00814291	0.012837	0.0128273	0.0125851	0.0112083	0.00943569	0.022972	0.0151423	0.0126161	0.0136875	0.0138398	0.00960461	0.0115699	0.0106545	0.00830777	0.00978842	0.015644	0.0200988	0.0148136	0.015552	0.00925815	0.00695203	0.0135477	0.00934306	0.0101597	0.00844224	0.00573721	0.00416917	0.0244095	0.011193	0.0176526	0.0133944
GAATA	0.00910252	0.0228822	0.00960353	0.0129579	0.0112458	0.00683519	0.0104428	0.011821	0.0125065	0.012729	0.0118356	0.0130601	0.0135143	0.00907302	0.0115735	0.014591	0.0131382	0.00979916	0.0129044	0.012941	0.0122918	0.0121661	0.011871	0.0127162	0.0148361	0.0119591	0.0146177	0.0138625	0.0088801	0.0119687	0.00958507	0.00840796	0.0101199	0.0180698	0.0106482	0.0148251	0.0152415	0.00991868	0.00699167	0.0142357	0.0098904	0.00945193	0.00924499	0.00623532	0.00255062	0.011048	0.013946	0.0110224	0.0102817
GGAAT	0.0134557	0.0257732	0.0134967	0.0155003	0.0146414	0.0313494	0.0128403	0.0144647	0.0144897	0.01494	0.0149178	0.0144687	0.0149621	0.0124553	0.0149032	0.01724	0.0160972	0.0135405	0.0150915	0.0146273	0.0142415	0.0140101	0.0143892	0.0142962	0.0134875	0.0142612	0.0146549	0.0126492	0.0136813	0.0150844	0.0124379	0.0130357	0.0138361	0.0156659	0.0152272	0.01668	0.0137264	0.0137986	0.0128991	0.0142928	0.015115	0.0138327	0.0126769	0.0140309	0.0111264	0.0103366	0.0168645	0.0127339	0.0140137
GGGAA	0.00916928	0.0103197	0.0130798	0.0126443	0.0108773	0.0114691	0.0122196	0.0110002	0.0127978	0.010857	0.00921542	0.00940615	0.0112419	0.011864	0.0117557	0.0105491	0.0121279	0.010786	0.0111743	0.0115893	0.0106464	0.0102885	0.0125245	0.0111446	0.0135242	0.0134748	0.0133012	0.012099	0.0120912	0.0124537	0.0127031	0.0103455	0.0112565	0.0102973	0.0120762	0.00831456	0.0130577	0.0113412	0.0105993	0.0114399	0.0114993	0.0108035	0.0111139	0.00670693	0.0103923	0.0184109	0.00791083	0.015997	0.0113382
GGGGA	0.00544641	0.00754133	0.00696777	0.0063011	0.00678973	0.00433027	0.00525074	0.00696412	0.00702295	0.00732685	0.00567253	0.00742117	0.00676162	0.00720569	0.00679483	0.00831538	0.00722279	0.00653836	0.00723941	0.0080919	0.00649784	0.00840252	0.0078354	0.0074385	0.00972017	0.00813117	0.00749114	0.00722327	0.00452387	0.0072139	0.00669299	0.0050381	0.0066883	0.00714609	0.00503845	0.00652248	0.00956002	0.00427572	0.00367618	0.00756194	0.00361472	0.00533011	0.00966538	0.00782669	0.00444984	0.0175689	0.0071378	0.0091122	0.00763298
TGGGG	0.00637394	0.00798619	0.00674356	0.00671803	0.00698868	0.00487044	0.00551138	0.00746878	0.00721188	0.00653695	0.00594885	0.00727845	0.00622605	0.007789	0.00669016	0.00747117	0.00704725	0.00674029	0.00724623	0.00727817	0.00660891	0.00917075	0.0069268	0.00717965	0.0101372	0.0185329	0.00706392	0.00801242	0.00573516	0.00770371	0.00773471	0.00664468	0.00789312	0.00685539	0.00504839	0.00759957	0.00988797	0.00509765	0.00366058	0.00710945	0.00395891	0.00551327	0.00631444	0.00291068	0.00281	0.0167156	0.00802504	0.00848762	0.00780713
CAGTG	0.00902269	0.00923165	0.00864191	0.00924958	0.00930494	0.00877984	0.00911508	0.00928128	0.00938968	0.00846787	0.00835445	0.00923447	0.00975111	0.00905639	0.00862794	0.0104395	0.00908627	0.00747444	0.00952584	0.00940574	0.00962305	0.00920216	0.00874036	0.00941611	0.0104425	0.00956609	0.00887092	0.00969739	0.00873599	0.00941766	0.00977304	0.00883427	0.00979596	0.00934232	0.0085141	0.00952841	0.0102847	0.00879693	0.00851699	0.0089086	0.00858325	0.00903118	0.00667919	0.00520882	0.00879216	0.00982168	0.00845208	0.00967445	0.010277
GCAGT	0.0127033	0.0131444	0.0110381	0.0114741	0.0119166	0.0108469	0.01099	0.0123505	0.01226	0.0111335	0.0119246	0.0133121	0.0126139	0.0110345	0.0117798	0.0127397	0.0129178	0.0112066	0.0123268	0.0127571	0.0123476	0.012362	0.0107613	0.0119272	0.0121886	0.0116227	0.0116953	0.0119107	0.0118092	0.0117823	0.0109975	0.0115934	0.0122262	0.0140566	0.0124252	0.0148236	0.0129281	0.0116045	0.0116464	0.0127527	0.0116029	0.0120642	0.00991494	0.00696218	0.00928469	0.0106268	0.0139759	0.011506	0.0134154
GGCAG	0.00999402	0.0100379	0.0100606	0.0101123	0.0101068	0.00999046	0.0101563	0.0100631	0.0102059	0.0104468	0.0100809	0.0103076	0.0102336	0.0100279	0.0101288	0.0100202	0.0102859	0.0100635	0.0100323	0.0104813	0.0105034	0.00996806	0.010194	0.0104355	0.010796	0.0104047	0.0104825	0.0107196	0.0100408	0.0102098	0.0101761	0.00993358	0.0103253	0.0108955	0.00989249	0.0103948	0.0106738	0.0100203	0.0101609	0.0106948	0.00998505	0.00998222	0.0127752	0.0119096	0.0108991	0.0106307	0.0107447	0.0115843	0.0110432
AGGCA	0.0101408	0.0102044	0.0114167	0.0113101	0.0108775	0.010541	0.0104627	0.0105552	0.0109483	0.0111638	0.0104694	0.0107846	0.0109924	0.0104867	0.010687	0.0106232	0.0111627	0.0105803	0.0111304	0.0106451	0.0105595	0.0110634	0.0110034	0.0106811	0.0119008	0.0112459	0.0109421	0.011964	0.0112741	0.0111379	0.0112537	0.0107683	0.010432	0.0121639	0.0103573	0.0113103	0.0116818	0.0111874	0.0108654	0.0114807	0.0107464	0.0109075	0.0115509	0.0120427	0.0110025	0.010624	0.0109994	0.0115574	0.0109799
GAGGC	0.010777	0.0102071	0.010701	0.010267	0.010465	0.0100386	0.0102759	0.0106531	0.0101325	0.0115073	0.0107784	0.0108734	0.0102509	0.0104942	0.0108148	0.0101927	0.0104722	0.0107603	0.0103502	0.0108879	0.0106117	0.0104611	0.0109498	0.0106952	0.0112917	0.0104704	0.010356	0.0105968	0.0098992	0.010277	0.0106402	0.0100345	0.0109598	0.0112094	0.0101218	0.0106084	0.0110022	0.00991098	0.010338	0.0105619	0.00995304	0.00988431	0.0148335	0.017125	0.0125769	0.0111917	0.0121751	0.0120803	0.0113362
GGAGG	0.0112137	0.01124	0.0118402	0.0115598	0.0115849	0.0103504	0.0113062	0.0115813	0.0114162	0.0130136	0.0118021	0.0117406	0.0111862	0.0109967	0.0118141	0.0110947	0.0111703	0.0113923	0.0116756	0.0124143	0.0115344	0.0112259	0.0123491	0.0118916	0.0122128	0.0117293	0.0113416	0.0109618	0.0110962	0.0120235	0.0109221	0.0102499	0.011015	0.0123361	0.0108262	0.0113675	0.0114067	0.0105968	0.0105423	0.0115477	0.0110512	0.0110315	0.0191009	0.0232189	0.0146027	0.0200701	0.0124273	0.0128355	0.0119327
GGGAG	0.0104116	0.010517	0.0118835	0.0114565	0.0108277	0.0106306	0.0114821	0.0110411	0.0113387	0.012796	0.0119276	0.0106576	0.0112351	0.0108698	0.011208	0.0107704	0.0113016	0.0116261	0.0115872	0.0107132	0.0107038	0.0108951	0.0130121	0.0113373	0.0109811	0.0107905	0.0114984	0.0110203	0.0103231	0.0110466	0.0103038	0.0103205	0.0108191	0.0111647	0.0104516	0.0106776	0.0109536	0.0108411	0.010511	0.0109563	0.0107449	0.010535	0.0189413	0.0233144	0.014358	0.011609	0.011757	0.012622	0.0118238
CGGGA	0.0109461	0.0111157	0.0111101	0.011553	0.0112912	0.0106527	0.0114579	0.0114488	0.0109332	0.0122012	0.0122958	0.0119323	0.0118391	0.0111882	0.0114453	0.0126753	0.0115026	0.0118367	0.0114509	0.0123475	0.0113805	0.0104144	0.0120608	0.0115923	0.0118073	0.0115765	0.0124082	0.011449	0.0103993	0.01147	0.0111701	0.0109649	0.0121251	0.0116553	0.0109849	0.011024	0.0117238	0.0108299	0.0107997	0.0115608	0.0110058	0.0105352	0.015349	0.0181297	0.012574	0.0107564	0.0135096	0.0124049	0.0116501
ACGGG	0.0100967	0.0104722	0.0106013	0.0110173	0.0102657	0.0104353	0.0114144	0.0102905	0.0107661	0.0110274	0.0109109	0.010781	0.0108863	0.0103148	0.0103418	0.0103928	0.0107461	0.0103932	0.010744	0.0112925	0.0112142	0.00991265	0.0113065	0.0113492	0.0108813	0.0106637	0.0116382	0.0110307	0.0102316	0.0106086	0.0111145	0.0104249	0.010934	0.0116669	0.0104975	0.0106246	0.0110807	0.0106073	0.0105654	0.0107051	0.0105609	0.0103655	0.0109994	0.0119325	0.0110021	0.0108183	0.01121	0.0121174	0.013648
TACGG	0.0101355	0.0107796	0.0107103	0.0119189	0.0104629	0.0109195	0.0127777	0.0103631	0.011313	0.011153	0.0115714	0.0111038	0.0111635	0.0101622	0.0107674	0.0103965	0.0111174	0.0106084	0.0114254	0.0112797	0.0113238	0.0098695	0.0121145	0.0113842	0.010842	0.011282	0.0132112	0.0114715	0.0106652	0.0110593	0.0104833	0.0104189	0.0113866	0.0117634	0.0110195	0.0108858	0.0107745	0.0111726	0.010948	0.0110606	0.0112898	0.0107525	0.0108488	0.0122371	0.0108469	0.0106514	0.0115976	0.0120149	0.0109889
GTACG	0.00988189	0.000332836	0.00019553	0.000496729	0.019904	0.00011142	0.0201924	0.000283124	0.000438809	0.000382859	0.000153634	0.0101445	0.0102013	0.000120275	0.0588645	0.000219072	0.000301995	0.010037	0.010486	0.0104226	0.000191916	0.000121545	0.000176033	0.000168618	0.00139993	0.000528975	0.00117501	0.0111096	0.00957789	0.0186649	0.0192381	0.00939362	0.00993568	0.00204235	0.000401841	0.000552431	0.0113737	0.000647882	0.000557975	0.00176882	0.000635995	0.00951476	3.35691e-05	8.41887e-05	9.20578e-05	0.000508488	0.0002824	0.000324097	4.23739e-05
GGTAC	0.0191865	0.0125939	0.00972395	0.0114908	0.010538	0.00648587	0.00926636	0.0112739	0.0111413	0.0110542	0.0098558	0.0118646	0.0108148	0.00947831	0.0109001	0.0135133	0.0116975	0.0106364	0.0108706	0.0130834	0.0107334	0.0111914	0.0100797	0.0111636	0.0136446	0.0104822	0.011612	0.00978613	0.00612172	0.00855517	0.0100595	0.00855934	0.00967741	0.0116069	0.00910874	0.0115612	0.023447	0.00786798	0.00646992	0.0120263	0.00777659	0.0144822	0.0100057	0.00507007	0.00308465	0.00208713	0.0120921	0.0165083	0.0128937
TGGTA	0.0155061	0.00487357	0.00315303	0.002519	0.00474546	0.00543129	0.00365912	0.00394816	0.00321978	0.00359598	0.00435884	0.00345387	0.00212325	0.00433285	0.00363442	0.00381192	0.00366144	0.00377316	0.00275688	0.00427451	0.00443018	0.00404131	0.00314758	0.00419256	0.00239064	0.00339248	0.00270884	0.0035232	0.00472889	0.0030082	0.00466264	0.00611272	0.00580917	0.00228357	0.00414268	0.00534548	0.00289952	0.00451453	0.00629424	0.00327138	0.00437521	0.0132168	0.00382782	0.00213976	0.00693749	0.000375375	0.00520467	0.00148967	0.00613835
TTGGT	0.0128481	0.00496653	0.00324639	0.00543827	0.00478685	0.00223629	0.00327109	0.00428128	0.00427957	0.00465307	0.00422432	0.00370903	0.00423838	0.00213303	0.00426675	0.00639615	0.00626201	0.00275145	0.00499216	0.00456014	0.00442334	0.00422831	0.00426563	0.00447293	0.00343586	0.00360543	0.00365739	0.00346933	0.00337616	0.00393011	0.00255534	0.00259441	0.00310871	0.00480049	0.00388591	0.00555326	0.00426356	0.00347545	0.00246648	0.00503021	0.00416407	0.0122862	0.00375554	0.00205732	0.000429276	0.000608897	0.0040285	0.00160697	0.00300977
CCGTG	0.00457551	0.00554964	0.00407489	0.00479676	0.00479272	0.00362497	0.00387154	0.00475451	0.00427575	0.00423736	0.00540802	0.00557267	0.00494253	0.00378829	0.00537207	0.00616343	0.00526819	0.00615729	0.00534839	0.00503041	0.00436596	0.00494655	0.00432495	0.00435267	0.00478011	0.00442721	0.00556012	0.00555175	0.00479315	0.00587819	0.00363532	0.00459918	0.00398174	0.00571476	0.00564337	0.00722327	0.00494772	0.00475838	0.00432389	0.00559917	0.00534979	0.00563717	0.00232216	0.00237305	0.00125787	0.00945852	0.00665928	0.00227798	0.0038525
TCCGT	0.00727123	0.00662747	0.00551799	0.00581079	0.00686808	0.00775883	0.00636888	0.00608973	0.00544114	0.00552592	0.00731118	0.00663774	0.00606592	0.00576222	0.00724645	0.0074764	0.00670591	0.00723559	0.00653982	0.00615505	0.00648926	0.00681893	0.00535548	0.00638532	0.00526187	0.00651356	0.00739321	0.00732507	0.0088949	0.00833651	0.00611667	0.00835734	0.00646699	0.00661603	0.00877879	0.0111766	0.005701	0.00839892	0.00833842	0.00688551	0.00807261	0.00872006	0.00316843	0.00407637	0.00753774	0.00949961	0.00879838	0.00291696	0.00810168
TTCCG	0.00774298	0.00730448	0.00527257	0.00511357	0.00756271	0.00694834	0.00518279	0.00651533	0.00531513	0.00622036	0.00762555	0.00760012	0.0063109	0.00596671	0.00753314	0.00940631	0.00786207	0.00719454	0.00657508	0.00741655	0.00638688	0.00639565	0.00451819	0.00619925	0.0053934	0.00638284	0.00601966	0.00521954	0.00741633	0.00717162	0.00660624	0.0080269	0.00722474	0.00644417	0.00814693	0.010932	0.00585687	0.00747738	0.00764071	0.00766608	0.00729451	0.00714858	0.00357723	0.0039714	0.00704804	0.00107721	0.00971348	0.00417277	0.00788912
AATTC	0.00330871	0.00507444	0.00415433	0.00465043	0.0047139	0.00185098	0.00263823	0.00503168	0.00544279	0.00478248	0.00358362	0.0039437	0.00502024	0.00335253	0.0044076	0.016596	0.00519335	0.00325393	0.00570524	0.00393898	0.00393298	0.024855	0.00477189	0.00393632	0.0037751	0.00369538	0.00313597	0.00237465	0.00305735	0.0043505	0.00268971	0.00244766	0.00215894	0.00437271	0.00400649	0.00607484	0.00374811	0.00351226	0.00206816	0.00367514	0.00340726	0.00267006	0.00278974	0.00239706	0.00041623	0.000329413	0.00417604	0.00100797	0.00311323
TAATT	0.00333983	0.0134531	0.0221036	0.00201806	0.00323264	0.00106582	0.000843174	0.00363163	0.0122631	0.014979	0.00383381	0.00332856	0.00315307	0.00231934	0.00366676	0.0139121	0.00272789	0.00365134	0.00313487	0.00363079	0.00327714	0.0136739	0.0133087	0.00336692	0.0111284	0.00130543	0.00142033	0.000920748	0.00178217	0.00245519	0.000747563	0.00223946	0.00200028	0.00301168	0.00288618	0.00554417	0.00166	0.00180865	0.00204841	0.00194135	0.0116559	0.00213697	0.00883789	0.0122616	0.00392064	5.48044e-05	0.00425198	0.00168776	0.00392242
CTAAT	0.00278577	0.00352249	0.00172023	0.00257908	0.00267352	0.00115141	0.000866381	0.00349271	0.00226122	0.00305437	0.00278977	0.00310088	0.0027328	0.00176574	0.00238533	0.00392679	0.00269951	0.00210467	0.00359141	0.00274971	0.00269882	0.00334714	0.00255455	0.00269801	0.00136154	0.00155414	0.00135124	0.00107273	0.00172282	0.00219272	0.000923304	0.00206138	0.00192722	0.00324499	0.00277371	0.00479375	0.00167558	0.00202285	0.00180515	0.00183902	0.0022413	0.00211543	0.00200091	0.00196948	0.000403981	0.00773102	0.00356451	0.00058111	0.00297737
ACCGG	0.00386692	0.00532104	0.00418328	0.00463972	0.00487334	0.00223834	0.00224394	0.00548953	0.00497194	0.00439401	0.00442284	0.00582945	0.00538804	0.004385	0.00481695	0.00654411	0.00434608	0.00454929	0.00554544	0.00384863	0.00371322	0.00688091	0.00492671	0.00375687	0.00381707	0.0038912	0.00254039	0.00403846	0.00432162	0.00621968	0.00259527	0.0036429	0.0031838	0.00471461	0.00454805	0.00669165	0.0044727	0.00372335	0.00272476	0.00455154	0.00381035	0.004546	0.00455525	0.00236604	0.00100572	0.00924879	0.00538378	0.00204419	0.003553
GACCG	0.00597656	0.00523282	0.00375351	0.00257986	0.00437818	0.00525964	0.00360197	0.00420005	0.0037871	0.00406787	0.00439425	0.0039947	0.00335015	0.00443684	0.00379383	0.00452891	0.0230248	0.00388987	0.00354692	0.00395916	0.00482689	0.00424067	0.00337531	0.00428227	0.00217246	0.00330688	0.00296964	0.00248519	0.00502642	0.00366843	0.00439059	0.00639367	0.00577238	0.00284543	0.00556647	0.00635257	0.00222013	0.00509053	0.00666759	0.00288049	0.00556309	0.00505704	0.00144515	0.00310664	0.00688715	0.000280138	0.00571633	0.00131397	0.00620285
GGACC	0.00278136	0.00396455	0.00221807	0.00266449	0.00335362	0.00128645	0.00126091	0.00322477	0.00304272	0.00336814	0.00291406	0.00314572	0.00312774	0.00187179	0.0031323	0.00504973	0.0235168	0.00262926	0.00351139	0.00299478	0.00294579	0.00354404	0.00252932	0.0028828	0.00220589	0.0023273	0.00201583	0.00164844	0.00208211	0.00255535	0.00152127	0.00216035	0.00208698	0.00291528	0.00303426	0.00512443	0.00214869	0.00214219	0.00185701	0.00299842	0.00271174	0.00224049	0.0012155	0.00179278	0.000383814	0.000416997	0.00386242	0.000851328	0.00294302
AGGAC	0.0030176	0.00472066	0.00522098	0.00453787	0.00441692	0.00158975	0.0024602	0.00490625	0.00529809	0.00535287	0.004499	0.0039262	0.00558589	0.00315648	0.00478794	0.00587713	0.0143738	0.00369224	0.00491113	0.00408418	0.00398167	0.00624814	0.00606588	0.00386055	0.00245085	0.00334278	0.00306604	0.00213998	0.00480799	0.00622878	0.00112222	0.00229959	0.0021493	0.0039565	0.00568072	0.00516239	0.00292414	0.00296432	0.00240994	0.003053	0.00342579	0.00333306	0.00697371	0.0092151	0.00228867	0.00077183	0.00426302	0.00141735	0.0033998
AAGGA	0.00425277	0.00608517	0.0064318	0.00623126	0.00513186	0.00319773	0.00506799	0.0063648	0.00726218	0.00708153	0.00624302	0.00611837	0.00763536	0.00505842	0.00628622	0.00677657	0.00578452	0.00675651	0.00670732	0.00536929	0.00521963	0.00768143	0.00737521	0.005117	0.00617636	0.00418604	0.0046367	0.00522811	0.0045122	0.00612951	0.00394541	0.00374611	0.00389065	0.00714784	0.0055518	0.00631148	0.0161394	0.00510453	0.00435611	0.00611994	0.00523652	0.00432273	0.00764541	0.0085274	0.00230847	0.000885877	0.00570241	0.00230372	0.00357173
TAAGG	0.00317065	0.00326678	0.00188384	0.00260904	0.00203681	0.00111101	0.00135848	0.0126232	0.00276738	0.00317126	0.00241199	0.00328984	0.00290762	0.00174977	0.00203061	0.00294343	0.00266347	0.00222487	0.00245854	0.0027118	0.0027711	0.00303374	0.00192871	0.00268383	0.00334923	0.00158033	0.00286702	0.00435728	0.00128109	0.00120124	0.00234395	0.00219803	0.00238696	0.00587203	0.00163861	0.00429499	0.00431736	0.0114805	0.00203278	0.00412094	0.00227415	0.0016653	0.00108953	0.00101969	0.0009696	0.00166458	0.00384026	0.00120371	0.00342205
ATAAG	0.0030395	0.00460607	0.00418963	0.00637749	0.00313741	0.00280014	0.00538903	0.0144682	0.00611985	0.00540922	0.00480038	0.0049088	0.0062674	0.00322597	0.0040903	0.00410769	0.0046764	0.00367754	0.00556719	0.00340292	0.00444124	0.00565118	0.00634417	0.00439857	0.00684181	0.00411926	0.00626583	0.00780974	0.00315294	0.00395626	0.00349053	0.00282881	0.00331784	0.0107578	0.00336241	0.00557345	0.00781366	0.0140433	0.00316418	0.00755974	0.00416786	0.00366502	0.00416708	0.00254867	0.000493035	0.00183149	0.00463311	0.00306424	0.00311623
AATAA	0.00376226	0.00622656	0.00562752	0.0174085	0.00474984	0.00291672	0.00564216	0.0159126	0.00739639	0.00777973	0.006365	0.00585862	0.00773106	0.00445179	0.00596506	0.00626387	0.00599278	0.0050528	0.00716029	0.00478149	0.00617269	0.0170303	0.00825913	0.00629578	0.00636226	0.00473455	0.0162298	0.00717547	0.00471895	0.00587263	0.00346318	0.0037664	0.00358543	0.0102005	0.00564176	0.00755519	0.00707901	0.0149573	0.00350427	0.00716022	0.00585542	0.00503033	0.00831798	0.0088383	0.00245451	0.00241504	0.00539914	0.00273435	0.00421067
TGAAT	0.000811569	0.00181056	0.00187474	0.00243527	0.00189422	0.00167407	0.00206403	0.00196262	0.00189646	0.00203919	0.00218328	0.00196291	0.00293099	0.00175955	0.00205801	0.0019104	0.00200993	0.00181938	0.00226364	0.00140248	0.00208237	0.00224564	0.00234576	0.00220857	0.00248653	0.0021437	0.00263035	0.00344729	0.00262034	0.00308555	0.00200674	0.00156302	0.000895589	0.00396309	0.0020896	0.00242391	0.00298437	0.00218964	0.00140362	0.00300322	0.0018227	0.00318354	0.000318501	0.000859565	0.000715746	3.83264e-05	0.00111142	0.000804677	0.000842098
ACATG	0.000499768	0.000955764	0.0399519	0.00154869	0.00062369	0.000668538	0.0014505	0.000844329	0.0206663	0.000805449	0.0202961	0.000688768	0.00112617	0.000900506	0.0011083	0.000549786	0.00128684	0.000494131	0.00146873	0.000354141	0.00128308	0.00122295	0.00170722	0.00115853	0.000533158	0.00134233	0.00215399	0.000929333	0.0097656	0.000878058	0.000311112	0.000867917	0.000780655	0.000976065	0.0010718	0.00130517	0.00034485	0.00147913	0.000641963	0.00062462	0.00122076	0.00127395	0.00017552	0.000563297	8.00259e-05	0.000179848	0.000697455	0.000333786	0.000473672
TCACA	0.0107831	0.00696014	0.00721763	0.00424166	0.00754824	0.013573	0.00926831	0.00599936	0.00540775	0.00489384	0.00785577	0.00439077	0.00445515	0.00920606	0.00544689	0.00331921	0.00528104	0.00654478	0.00548213	0.00664507	0.00767353	0.00557764	0.00618131	0.00686943	0.00386288	0.00689369	0.00548299	0.0064229	0.0113359	0.0068533	0.0110579	0.0139624	0.0131924	0.00366118	0.0101271	0.00588252	0.00390671	0.011501	0.0161641	0.00511748	0.0116374	0.0118556	0.00294476	0.0056863	0.0197181	0.0169297	0.00691902	0.00365979	0.00993751
ATCAC	0.00349879	0.00288975	0.00142682	0.00143303	0.00271314	0.00102036	0.000867452	0.00262768	0.000992199	0.00220257	0.003115	0.00292554	0.00165736	0.00249638	0.00190976	0.00400405	0.00211522	0.00277907	0.00236245	0.0126523	0.00262404	0.00216376	0.00123925	0.00299508	0.00135039	0.00205044	0.00145568	0.00237774	0.00175094	0.0026652	0.00121224	0.00238579	0.00345223	0.00135398	0.00163502	0.0019587	0.00168146	0.00149655	0.00108639	0.00192169	0.00131676	0.00189148	0.000802564	0.000620453	0.000365722	0.000405267	0.00467227	0.000235088	0.000366649
TATCA	0.000416086	0.000746836	0.000574792	0.000504471	0.000693672	0.000412466	0.000477916	0.000979917	0.00080595	0.000459563	0.009946	0.000610411	0.000937095	0.000761957	0.000933443	0.00135298	0.000810127	0.00124544	0.00128789	0.000806194	0.000903071	0.000936286	0.000638833	0.00107759	0.000393271	0.00116832	0.00112236	0.000320622	0.000751341	0.0014859	0.000280428	0.000565484	0.00108298	0.000242583	0.000757574	0.000466226	0.000699776	0.000550046	0.000426268	0.00034804	0.000693367	0.00136795	0.000107387	0.00018815	3.85042e-05	0.000132325	7.65416e-05	0.000138722	2.34956e-05
GTATC	0.00227118	0.000871245	0.00258261	0.00147652	0.00231071	0.00467403	0.00334356	0.00142495	0.00219188	0.00124282	0.0020936	0.00108227	0.00151718	0.00206936	0.00199786	0.010909	0.00217141	0.00123573	0.00163511	0.00158981	0.00233745	0.00150664	0.00204907	0.001962	0.000692138	0.0027407	0.00232688	0.0019171	0.00442757	0.00251141	0.00361912	0.00387272	0.00244019	0.00102744	0.00350105	0.00281806	0.000892073	0.00444492	0.00580443	0.00163937	0.00416698	0.00468475	0.000500413	0.00195684	0.00669376	0.000518625	0.00269593	0.00187372	0.00300089
TGTAT	0.00353887	0.00326604	0.0119446	0.0022166	0.00263556	0.00107797	0.00122886	0.00279149	0.00224578	0.0024721	0.00297246	0.00329514	0.00209234	0.00228568	0.00320723	0.00276694	0.00280042	0.00412108	0.00289913	0.00257313	0.00189059	0.00412654	0.00275367	0.00211699	0.000598393	0.00182181	0.00162587	0.000758083	0.00235297	0.00328846	0.000392553	0.00280813	0.00218593	0.000773905	0.00336274	0.00453344	0.000453124	0.00195023	0.00236555	0.000900351	0.00310366	0.00262341	0.00546472	0.00655079	0.00227394	0.000257417	0.00336075	0.00222029	0.00319692
ATGTA	0.00103619	0.00253203	0.0218006	0.00360977	0.00232615	0.00131189	0.0025622	0.00222286	0.00318571	0.00272388	0.00251238	0.0017005	0.00247227	0.00181856	0.00289989	0.00246481	0.00378265	0.00160819	0.00328867	0.0021061	0.00268176	0.00233865	0.00295453	0.0029973	0.00236852	0.00267867	0.00310288	0.00246291	0.0118043	0.00323111	0.00171894	0.00138961	0.00154984	0.00240176	0.00314398	0.00244447	0.0022927	0.00262839	0.00123484	0.00252186	0.00313199	0.00272141	0.000452623	0.00140997	7.81808e-05	4.30187e-05	0.000853235	0.00110391	0.000275513
GCATG	0.000394343	0.00191823	0.00322792	0.00414456	0.00207054	0.00170726	0.00267112	0.00286573	0.023147	0.00253416	0.0021426	0.00102712	0.00300483	0.00236739	0.00270965	0.00174085	0.00217026	0.00256508	0.00334979	0.000876427	0.00201038	0.00408659	0.00454643	0.00214893	0.00246694	0.00285118	0.00303258	0.00422184	0.0036279	0.00438478	0.00206608	0.00156113	0.000835641	0.00365287	0.00203702	0.00216981	0.00338927	0.00292169	0.00129246	0.00350514	0.0022068	0.00308217	0.00348619	0.00159249	0.000782441	0.00953687	0.00112962	0.000691107	0.000674996
TTTGC	0.00236856	0.00213089	0.00124431	0.00167717	0.00156193	0.000650457	0.000757264	0.00193708	0.00148978	0.00256204	0.00216743	0.00233359	0.00164121	0.0010308	0.00142757	0.00201004	0.00171068	0.00210632	0.00203099	0.00177803	0.00136243	0.00346835	0.00213517	0.0020226	0.000770708	0.00103974	0.0011304	0.000439454	0.000638504	0.000856678	0.000506228	0.00165799	0.00172612	0.00164136	0.00101412	0.00330692	0.00130523	0.00137305	0.00132542	0.00157265	0.00102604	0.00109505	0.00452722	0.00634717	0.00199172	0.000214235	0.0032044	0.000773742	0.00287699
ATTTG	0.00118951	0.00187192	0.000927899	0.000767933	0.00167047	0.000589126	0.000555633	0.00168838	0.00119925	0.0019098	0.00185295	0.00198107	0.000818957	0.0012733	0.00209326	0.00142692	0.00110251	0.00219438	0.00178374	0.0023688	0.00104981	0.00339235	0.00210897	0.00138437	0.00039414	0.00113096	0.00143214	0.000638984	0.000984329	0.00151493	0.000231981	0.00171399	0.000846296	0.000567158	0.00113299	0.00349792	0.000241382	0.000956857	0.00127792	0.000435158	0.0100792	0.0018038	0.00460353	0.00605719	0.00228503	0.000185794	0.00165151	0.000660428	0.00300953
TATTT	0.00173393	0.00285031	0.00206617	0.00223096	0.002876	0.00129113	0.00199495	0.00241872	0.00258716	0.0029472	0.00250107	0.00245391	0.00150302	0.00172568	0.00289711	0.00274696	0.00316451	0.00225053	0.00292818	0.00288295	0.00272167	0.00329592	0.00231319	0.00311332	0.0128317	0.00302417	0.00243446	0.00139983	0.00143393	0.00176529	0.00225217	0.00167376	0.00152109	0.00206804	0.00207718	0.00400893	0.00230603	0.00194709	0.00144876	0.0022158	0.00132634	0.0017865	0.00454475	0.0059514	0.00230044	3.2249e-05	0.00153232	0.00148025	0.00309443
ACTTA	0.00166654	0.00175819	0.000808527	0.000602095	0.000912606	0.000651523	0.000737841	0.00135391	0.00104603	0.00152714	0.00144238	0.00087174	0.000922189	0.00157665	0.000375127	0.00107902	0.00111158	0.00169691	0.00124134	0.00147287	0.00192256	0.00121014	0.00064578	0.0015613	0.000531659	0.000941159	0.00121141	0.000339387	0.00054973	0.000432534	0.000479005	0.00147573	0.00235129	0.00179722	0.000695468	0.000718325	0.000607399	0.000807314	0.000418304	0.000876534	0.000848418	0.000664235	0.00330527	0.000654253	0.000258876	0.000170825	0.000196576	0.0002865	0.000752654
TACTT	0.00315559	0.00394377	0.00193532	0.00231301	0.00302813	0.00133434	0.00163021	0.00339721	0.00304387	0.0027831	0.00274695	0.00377093	0.00319795	0.00211745	0.00283281	0.00406741	0.0031629	0.00189701	0.00343534	0.00289245	0.00356222	0.00382774	0.00228738	0.00340362	0.00221202	0.00215146	0.00269465	0.00143697	0.00206711	0.0024863	0.00159756	0.00288261	0.0029367	0.00284093	0.00314202	0.00536963	0.00243003	0.00242812	0.00190882	0.00242926	0.00275247	0.00248142	0.00115023	0.00177651	0.000431093	0.00156713	0.00372372	0.000698679	0.00298767
ATACT	0.000446037	0.000611521	0.00037773	0.000461881	0.000334475	0.000320398	0.000327847	0.000575863	0.000558031	0.000685057	0.000469669	0.000607968	0.000351494	0.000708299	0.000527596	0.000165563	0.000501535	0.000169754	0.000529129	0.000829181	0.00127915	0.000659756	0.000400994	0.00143736	0.000486233	0.000721585	0.00100017	0.00029927	0.000375535	0.000248126	0.00065591	0.000437969	0.000836993	0.000570249	0.000575232	0.000651724	0.000882349	0.000603904	0.000567256	0.000319782	0.000260285	0.000367577	6.03393e-05	0.000225146	8.79101e-05	0.00057031	5.49664e-05	0.000415733	6.57622e-05
TATAC	0.00108945	0.00111458	0.0210209	0.00198237	0.000901166	0.00102041	0.00202833	0.000912766	0.00129033	0.000957945	0.00138979	0.00159833	0.00160627	0.000991012	0.00175841	0.000755156	0.00180665	0.00154917	0.00186537	0.00136537	0.0012437	0.00125389	0.00200655	0.000993965	0.00049803	0.00150322	0.00238367	0.000622404	0.00104016	0.00105505	0.000478146	0.00153832	0.000948895	0.000925979	0.00143558	0.0012301	0.000320997	0.00186543	0.00150421	0.00079285	0.00200243	0.00126323	0.000889255	0.000509316	1.81738e-05	1.60079e-05	0.000470033	0.00177637	8.05273e-05
TATGT	0.000882216	0.00137265	0.00122997	0.00151847	0.0201696	0.000541196	0.000905009	0.00138682	0.00164325	0.000986617	0.00122443	0.00137703	0.00126807	0.00126155	0.00133896	0.000882251	0.00138607	0.000647626	0.00194684	0.000738839	0.00102366	0.00168665	0.0011471	0.00113899	0.000871654	0.0012788	0.0012177	0.000476946	0.00214201	0.0025874	0.000484195	0.000792402	0.00102878	0.000903127	0.00241369	0.00127027	0.00102261	0.00130712	0.000576526	0.000711493	0.00184059	0.00182366	0.000317858	0.00131295	0.000117442	6.04851e-06	0.000504771	0.00025347	0.000411896
GTATG	0.00474367	0.00516973	0.00139851	0.00262811	0.0222139	0.00208276	0.0024841	0.00367513	0.0124489	0.00243526	0.00403203	0.0048228	0.00239441	0.00245499	0.00317582	0.00400108	0.00306339	0.00329234	0.00319257	0.00333646	0.00322024	0.00507172	0.00286761	0.00383507	0.00101879	0.00253332	0.00375099	0.00137674	0.00278445	0.00339672	0.00075505	0.00386594	0.00478277	0.00142482	0.00391082	0.00756219	0.00127866	0.00231089	0.00299076	0.0010314	0.0031305	0.00239745	0.00172005	0.00181103	0.000312569	0.00028124	0.00612657	0.000443949	0.00487713
GGTAT	0.00238689	0.00176793	0.00417887	0.00215589	0.00296856	0.00514304	0.00410653	0.0023518	0.00405912	0.00199306	0.00261401	0.00200689	0.00286256	0.00358067	0.00292973	0.0019635	0.00267914	0.00235614	0.00257562	0.00148933	0.0020856	0.00343378	0.00410076	0.00191416	0.00179431	0.00364858	0.00293602	0.00272961	0.00590912	0.00426604	0.00401602	0.0041726	0.00324899	0.00192608	0.00410554	0.00276871	0.00243714	0.0051944	0.00596022	0.00256281	0.00458646	0.0055287	0.00350175	0.00223563	0.00722728	0.00272874	0.00269709	0.00170708	0.00330826
AGGTA	0.00461259	0.00460307	0.00482417	0.00421571	0.00345421	0.00248042	0.00316417	0.0048673	0.0050289	0.00456424	0.00379207	0.00473865	0.00550309	0.0040233	0.00507567	0.00515093	0.00379593	0.00438826	0.00461117	0.00357756	0.00430827	0.00660909	0.0057969	0.00463092	0.00431216	0.00340474	0.00373232	0.00281737	0.00348015	0.00434141	0.00310552	0.00359812	0.00395239	0.00420633	0.00446068	0.00513409	0.0137325	0.00378743	0.00281735	0.00349031	0.00372997	0.00291187	0.00983463	0.00792767	0.00331681	0.00123397	0.00445835	0.00803351	0.00683315
TAGGT	0.000727129	0.000723784	0.00144034	0.00129275	0.000999306	0.000995014	0.000840458	0.000819275	0.000944626	0.000431122	0.000595867	0.000768695	0.00109132	0.000976681	0.00162712	0.000510735	0.00115598	0.00207912	0.00136336	0.000506002	0.000442255	0.00121038	0.00108168	0.000683283	0.000920065	0.00139737	0.000743565	0.00207595	0.00155171	0.00170034	0.00129219	0.00152382	0.000384946	0.000979179	0.00133399	0.00116946	0.00101142	0.00161282	0.00134293	0.00977199	0.00160217	0.00187953	0.000823532	0.00010087	4.57122e-05	4.92295e-05	0.000328678	0.000483295	0.000139234
TTAGG	0.00187582	0.00192959	0.00168626	0.00155025	0.00142111	0.00134066	0.00142187	0.00144658	0.00175054	0.00102679	0.00127271	0.00244133	0.00173252	0.00119803	0.00244417	0.00147823	0.00179923	0.0033222	0.00204562	0.00201761	0.00103335	0.00237436	0.00128257	0.000979832	0.00221311	0.00137135	0.00147054	0.00123264	0.000825247	0.000599158	0.00141933	0.00254813	0.000980584	0.00192578	0.00173324	0.00291407	0.00149287	0.00208067	0.0027574	0.00205285	0.00235482	0.00111986	0.00211107	0.000377772	0.000463107	5.81458e-05	0.00134291	0.000743703	0.00256233
AAGTT	0.00504958	0.00466058	0.00418488	0.00550688	0.00484145	0.00663414	0.00611435	0.00397546	0.00426175	0.00380451	0.00455008	0.00426427	0.00442164	0.00447024	0.0041191	0.00305047	0.00374825	0.0046342	0.00445435	0.00391679	0.00508549	0.00503279	0.00458249	0.00500799	0.00371629	0.00507078	0.00540675	0.00512632	0.00625686	0.00526356	0.00530326	0.0068056	0.00631295	0.00343106	0.00516318	0.00579549	0.00324315	0.00596651	0.00709771	0.00417143	0.00557966	0.00651487	0.00593948	0.00285465	0.00717271	0.000449559	0.00427435	0.00189075	0.00661245
AAAGT	0.00693449	0.00815523	0.00814705	0.00789809	0.00964473	0.00743101	0.00671996	0.00789217	0.00787696	0.00822605	0.00747711	0.00548835	0.00626965	0.00743047	0.00750781	0.00937242	0.00820958	0.00752655	0.00821553	0.00745749	0.00737595	0.00954292	0.0084167	0.00733103	0.00729057	0.00765314	0.00498465	0.00758835	0.0080835	0.00813211	0.00845876	0.0082039	0.0073969	0.00602104	0.00796102	0.00811755	0.00621781	0.00804368	0.0096051	0.00686857	0.00864024	0.0078352	0.00903632	0.00936053	0.00908575	0.0102194	0.00805239	0.0029366	0.00716109
ATAAA	0.00316469	0.0043826	0.00221096	0.00288263	0.00335934	0.00193461	0.00240963	0.00343659	0.00296226	0.00311157	0.00376424	0.00457141	0.00434247	0.0022991	0.00282654	0.00515832	0.00339488	0.0025004	0.00376857	0.00324807	0.00398118	0.00403633	0.00296878	0.00354988	0.00316197	0.00250336	0.0132862	0.0025586	0.00227699	0.0028847	0.00207719	0.00275838	0.00297269	0.00551782	0.00380025	0.00538035	0.00302641	0.00256956	0.00219591	0.00359785	0.00307327	0.00360592	0.00111272	0.0018718	0.000638414	7.04551e-05	0.00439524	0.00124225	0.00376036
AGAAT	0.00151677	0.00238573	0.00352505	0.00421269	0.00334317	0.00164465	0.00309116	0.00323684	0.00436443	0.00418734	0.00217271	0.00282786	0.00374621	0.00258011	0.00354848	0.0129783	0.00360582	0.00324419	0.00404583	0.00320816	0.00272664	0.00355791	0.00367463	0.00298488	0.00486482	0.00306355	0.00236864	0.00412916	0.0023333	0.00320888	0.00311947	0.00144116	0.000701391	0.00531855	0.0023867	0.00249575	0.00517129	0.00284051	0.00167365	0.00430651	0.00211293	0.00140277	0.00404592	0.00103004	0.000136872	0.00126179	0.000853131	0.00145578	0.000297165
GAGAA	0.00348027	0.00166276	0.00318049	0.00241317	0.00279049	0.00517579	0.003885	0.00222155	0.00245928	0.00173155	0.00248589	0.00218439	0.00252752	0.00385442	0.00239351	0.00146869	0.00246241	0.00216843	0.00238362	0.00184059	0.00294427	0.00195552	0.00236391	0.00227355	0.00141521	0.00351623	0.00285936	0.00276565	0.00462144	0.00241778	0.00445412	0.0042935	0.00383276	0.001815	0.00372656	0.0029181	0.00182659	0.0044904	0.00583775	0.00224489	0.00423679	0.00479645	0.00206742	0.00257745	0.00784578	0.000577105	0.00297112	0.0124765	0.0102297
TGAGA	0.00323907	0.00216384	0.0023981	0.00144054	0.00237582	0.00449968	0.00297246	0.00190816	0.00180442	0.00166078	0.00216943	0.00124988	0.00116337	0.00299908	0.00188997	0.000864337	0.0018104	0.00201945	0.00153132	0.00173906	0.00282545	0.00189547	0.0021198	0.00230366	0.00137783	0.00310552	0.00220349	0.0023315	0.00392888	0.00217051	0.00426326	0.00453418	0.00406824	0.00156331	0.00311142	0.00193555	0.00130528	0.00390209	0.0053318	0.00189908	0.0036593	0.00372592	0.000522947	0.00189468	0.00657576	0.000242114	0.0021943	0.000984058	0.00340842
TTATG	0.000570015	0.0011111	0.00100025	0.00148392	0.000914243	0.00123527	0.00187195	0.000989265	0.00127659	0.00109673	0.00195408	0.00179787	0.00175324	0.000501939	0.000925845	0.000435021	0.0015969	0.000902328	0.0015442	0.000462823	0.00104802	0.000899441	0.00151245	0.000848296	0.00233626	0.00123375	0.00236997	0.00223912	0.000777048	0.00113708	0.00137567	0.000534194	0.000957727	0.00380241	0.001495	0.00108485	0.00242227	0.00176111	0.0012199	0.00313214	0.00145316	0.00220181	9.4664e-05	0.000649287	0.000192796	0.000175377	0.000884896	0.000420782	0.000511922
TTTTA	0.00159337	0.00209018	0.0024269	0.00307516	0.00336864	0.00185322	0.00219831	0.00262975	0.00330554	0.00230391	0.00303687	0.00264794	0.00372791	0.00121642	0.00255233	0.00296499	0.00289126	0.00139465	0.00314589	0.00377112	0.00222719	0.00154855	0.00264167	0.00194385	0.00305838	0.00214178	0.0217021	0.00202005	0.00340203	0.00418421	0.00140179	0.0011439	0.0011345	0.00414139	0.00484277	0.003256	0.0023911	0.00257617	0.00188155	0.00314951	0.004249	0.00425299	0.000516177	0.0022913	0.000423575	0.000255185	0.00204105	0.00194174	0.000707786
CTTTT	0.00389742	0.00648742	0.0068759	0.00899966	0.00682289	0.0028194	0.00448434	0.0079356	0.00896695	0.0072218	0.00639077	0.00650131	0.00913783	0.0044923	0.00675501	0.00903486	0.00753391	0.0042602	0.00825386	0.00628767	0.00503496	0.00721884	0.00786722	0.00494758	0.00582513	0.00488035	0.00447709	0.0057242	0.0063788	0.00828882	0.00261178	0.00279643	0.00275533	0.00859073	0.00771375	0.00746318	0.00721612	0.00573967	0.00315858	0.00635011	0.00705761	0.00527634	0.00395411	0.00486974	0.000597267	0.00159726	0.00494742	0.00277524	0.00333054
TGCTT	0.00408574	0.00581165	0.00544272	0.00703919	0.00521876	0.00345909	0.00509147	0.00608074	0.00749743	0.00595223	0.00530051	0.00571711	0.00664077	0.00430874	0.00591306	0.00542178	0.00642877	0.00514498	0.00722437	0.00448766	0.00534638	0.00717358	0.00650499	0.00567748	0.00888846	0.00526059	0.00468759	0.00929112	0.00562732	0.00713481	0.00527727	0.00350007	0.00279935	0.00996508	0.00593077	0.0077678	0.00930751	0.0055048	0.00305187	0.00836542	0.00496756	0.00540913	0.00575905	0.00263066	0.00106088	0.018432	0.00472014	0.00343398	0.0033755
AACTG	0.0034278	0.00397892	0.00253603	0.00284554	0.00352502	0.00209633	0.0019494	0.00336031	0.00332524	0.00375904	0.00393303	0.00376036	0.00326019	0.00202537	0.0032579	0.00410452	0.00492731	0.00307407	0.00382122	0.00334021	0.0031089	0.00363061	0.0031926	0.00311391	0.00280962	0.00257686	0.00260152	0.00292094	0.00303684	0.00322143	0.0024206	0.00244713	0.00213373	0.0047183	0.0037336	0.00542105	0.00325334	0.00295271	0.00255962	0.00438546	0.00319496	0.00371228	0.00114442	0.00177816	0.000491115	0.000936569	0.00420492	0.00191455	0.00312406
AAACT	0.00376602	0.00494645	0.0034726	0.005714	0.00459152	0.0033084	0.00445969	0.00442353	0.00460974	0.00440154	0.00489861	0.00569436	0.00523263	0.00287557	0.00401142	0.00371709	0.00475398	0.00359933	0.00454674	0.00493221	0.00471603	0.00476444	0.003704	0.00468823	0.0055549	0.00407352	0.00517129	0.00556537	0.00400659	0.00448492	0.00398399	0.00365584	0.00299363	0.00723828	0.00493578	0.00672842	0.00561403	0.00436747	0.00339578	0.00627911	0.00412423	0.00485775	0.00126602	0.00243046	0.000706373	0.000684004	0.00512962	0.00258352	0.00352709
TATGG	0.00651935	0.00686554	0.00160207	0.00257153	0.00395032	0.00245439	0.00304104	0.00419329	0.00313462	0.00386102	0.00495664	0.00634107	0.00295428	0.0126266	0.0033495	0.0055258	0.00429877	0.00483	0.00366002	0.00445233	0.00474973	0.00652792	0.00307303	0.00506466	0.00258337	0.00285421	0.00492567	0.00331989	0.00130331	0.00143813	0.00153869	0.00496539	0.00579286	0.00498522	0.00294452	0.00994146	0.00332285	0.00298797	0.00377562	0.00315127	0.00241013	0.00221444	0.00221646	0.00159894	0.000554984	0.000502505	0.00922944	0.00109023	0.00770588
CTATG	0.00245641	0.00299116	0.00129142	0.000908133	0.00189448	0.00124501	0.00125517	0.00197154	0.0017746	0.00208511	0.00223138	0.00245561	0.00195113	0.00170991	0.00144684	0.0025152	0.0030919	0.00207545	0.00214838	0.00206292	0.00266465	0.00276301	0.00124591	0.00246164	0.00153529	0.00212019	0.00209632	0.00110861	0.000616341	0.000624866	0.000888527	0.00185137	0.00202465	0.00248951	0.00170253	0.00394137	0.0015575	0.00194813	0.00213667	0.00222284	0.00144497	0.00230397	0.000875229	0.000997191	0.000308547	0.000581054	0.00323742	0.000516315	0.00286365
CCTAT	0.00302036	0.00464578	0.00149714	0.00131249	0.00252447	0.00145008	0.00175139	0.00278302	0.00262524	0.00230622	0.00229896	0.003727	0.00203591	0.00257992	0.00266097	0.0032982	0.00304741	0.00380852	0.0031796	0.00231919	0.00283201	0.00432301	0.00181412	0.0027754	0.00148989	0.00298549	0.00263561	0.00135376	0.000927187	0.00194278	0.000932883	0.00284195	0.00249448	0.00276715	0.00180326	0.00651172	0.00180779	0.00205984	0.00257162	0.00202041	0.00170013	0.00259028	0.00147578	0.000899478	0.000314651	0.000457909	0.00448198	0.000598649	0.00508635
CCCTA	0.00818717	0.008375	0.00477288	0.00346845	0.00584282	0.00768931	0.00578452	0.005486	0.00518699	0.00427409	0.00568251	0.00691224	0.00441322	0.00615528	0.00589406	0.00539603	0.00565982	0.00778	0.00524795	0.00495112	0.0053303	0.00742804	0.00419141	0.004844	0.00369314	0.0148905	0.00590646	0.00413211	0.00559901	0.00344856	0.00525185	0.00960958	0.00751309	0.0044207	0.00679843	0.0113424	0.00387661	0.0073738	0.0103594	0.00513788	0.00722287	0.0062903	0.00395753	0.00330293	0.00739959	0.000642638	0.00834092	0.00273977	0.0111163
GCCCT	0.00305289	0.00352618	0.0024606	0.00206363	0.00286932	0.000957728	0.0010389	0.00325515	0.00256302	0.0043498	0.00360125	0.00321474	0.0029669	0.0020387	0.00326782	0.00402938	0.00273555	0.00342204	0.00338983	0.00296048	0.00281967	0.00376981	0.00352754	0.00299648	0.00146048	0.00150764	0.00130545	0.000771734	0.00166135	0.00249282	0.000742205	0.00213842	0.00191478	0.00362567	0.00280565	0.00468461	0.00171359	0.00186612	0.00180584	0.00221807	0.0023512	0.00219964	0.00996335	0.0124913	0.00380903	0.000338834	0.00408629	0.00165956	0.00397753
GGCCC	0.00281825	0.00326379	0.00195038	0.00168591	0.00251738	0.000821729	0.000766695	0.00273072	0.00201639	0.00291317	0.00283296	0.00299174	0.00256205	0.00175302	0.00271165	0.00388349	0.00260746	0.00246444	0.00271386	0.00252007	0.00257514	0.00331612	0.00231813	0.00251784	0.00120303	0.00141378	0.00122341	0.000457746	0.00156204	0.00218909	0.000688533	0.0019871	0.00184856	0.00329328	0.00270083	0.00458645	0.00137846	0.00162321	0.00166621	0.00218829	0.00220947	0.00203187	0.00468764	0.00705461	0.00197135	0.000168939	0.00375814	0.000954281	0.00352843
CGGCC	0.00354523	0.00405012	0.00202636	0.00201338	0.00291266	0.00112317	0.00109362	0.00314068	0.00227537	0.00265455	0.00302306	0.00448341	0.0027697	0.00285616	0.00305248	0.00424623	0.00316723	0.00273176	0.00286708	0.00350366	0.00303642	0.00363964	0.00186353	0.00275829	0.00220661	0.00245504	0.0026575	0.0016823	0.00187201	0.00277204	0.00179411	0.00283355	0.00331045	0.00266228	0.00284773	0.00497149	0.0028462	0.00206434	0.00194136	0.00259484	0.00250862	0.00227048	0.00278138	0.00200968	0.00149862	0.000210189	0.00547532	0.00738382	0.00643795
ACGGC	0.00840064	0.00786702	0.00600714	0.00501531	0.0075742	0.00730056	0.00599477	0.0064937	0.00587593	0.00584179	0.00729349	0.00777588	0.00523819	0.00726585	0.00688527	0.00768099	0.00752315	0.0074298	0.00656078	0.00828906	0.00730303	0.00605635	0.0047169	0.0064701	0.00676529	0.00699202	0.00662834	0.00510316	0.00695465	0.00666179	0.00865858	0.00890272	0.00867148	0.00527824	0.00787957	0.00840186	0.00592394	0.00751523	0.0084171	0.00713658	0.00804291	0.00713589	0.00444298	0.00413807	0.00830014	0.000783257	0.00976155	0.00970363	0.010041
GACGG	0.0170196	0.0144391	0.0141196	0.0122829	0.015616	0.0189354	0.0159576	0.0137795	0.0136219	0.013026	0.0146899	0.0146635	0.012678	0.0158607	0.0144898	0.0143945	0.0154635	0.0143598	0.0132263	0.0160534	0.0160917	0.01296	0.0111969	0.0148796	0.0155042	0.0161226	0.0152877	0.0140674	0.0172611	0.0147559	0.0198635	0.0198002	0.0178253	0.0124885	0.0170643	0.0171098	0.0151575	0.0181714	0.0196639	0.0152122	0.0172252	0.0158534	0.00989935	0.00922543	0.022627	0.00233162	0.0172866	0.0202584	0.0215023
TGACG	0.0101782	0.0124378	0.0120309	0.0124241	0.0127691	0.0110908	0.0100746	0.0116622	0.0115465	0.0117877	0.0119297	0.0118052	0.0105584	0.0120533	0.012623	0.0129914	0.0137517	0.0124352	0.012521	0.0123873	0.0105917	0.0125987	0.0108213	0.0113404	0.0129786	0.0134258	0.0109487	0.0135115	0.0130448	0.0148659	0.0135887	0.0119918	0.0105326	0.0109564	0.0117129	0.011991	0.0139072	0.0123474	0.011034	0.0135091	0.0121862	0.0127304	0.0132876	0.0111657	0.0123686	0.0102705	0.0133402	0.0190001	0.0141369
ATGAC	0.00431675	0.00738797	0.00560286	0.00786596	0.00571966	0.00345789	0.0052003	0.00651069	0.00721095	0.00645795	0.00563617	0.00706097	0.00714744	0.00486486	0.00624666	0.00879595	0.00758184	0.00393708	0.00717145	0.00703011	0.00489884	0.00657005	0.00631573	0.0053012	0.00714622	0.00672747	0.00688162	0.0063767	0.00410901	0.00584938	0.00441199	0.00348716	0.00445248	0.0172205	0.00468772	0.0064676	0.00762744	0.00495932	0.00253363	0.00621757	0.00474672	0.00362243	0.00423108	0.00335022	0.00156448	0.000843017	0.00594842	0.00846965	0.00598284
AGGAT	0.00368284	0.00548513	0.00366923	0.00440362	0.00323345	0.00248083	0.00351869	0.00423911	0.00396021	0.00566491	0.00607779	0.00534248	0.00431159	0.00361907	0.00496795	0.00370724	0.00465284	0.00565655	0.00429856	0.00468069	0.00367478	0.00417586	0.0046117	0.00387659	0.00341964	0.0032091	0.00369512	0.00268888	0.00233199	0.00373275	0.00251741	0.00297932	0.00332777	0.00576249	0.00438954	0.00504285	0.0129483	0.00363508	0.0036266	0.00430968	0.00449625	0.0039234	0.00914943	0.0126657	0.0038649	0.00103805	0.00537274	0.00210426	0.00305061
CAGGA	0.00292863	0.0228675	0.00214132	0.00201783	0.00255158	0.00105678	0.00113879	0.00313656	0.00254443	0.00340235	0.0032649	0.00320816	0.00256342	0.00189043	0.00287852	0.00273153	0.00287234	0.00274064	0.00252139	0.002817	0.00282752	0.00334816	0.0025998	0.00278759	0.00238178	0.00149586	0.00158063	0.00209893	0.00171476	0.00239823	0.00118781	0.00205183	0.00205746	0.00479524	0.00285759	0.00471187	0.00281677	0.00185007	0.00171035	0.00318752	0.00231076	0.00225899	0.00518683	0.00764551	0.00224967	0.000508496	0.0040563	0.00202158	0.00329033
GCAGG	0.00657456	0.00673266	0.00406516	0.00406758	0.00460288	0.00341623	0.00485654	0.00550738	0.00481025	0.00507843	0.0054936	0.00632633	0.00514275	0.00456979	0.0050409	0.00662234	0.00527748	0.00472847	0.00489324	0.00568456	0.00726695	0.00603357	0.00451889	0.00660746	0.00694497	0.00493864	0.00696276	0.00454667	0.0028732	0.0034173	0.00464266	0.00522216	0.00669931	0.00809735	0.00494711	0.0095382	0.00613208	0.00400315	0.00347313	0.00582388	0.00427138	0.00365398	0.00831898	0.00974773	0.00487205	0.00100749	0.0087709	0.012426	0.0129073
AGCGT	0.00278495	0.00338574	0.00150384	0.00164422	0.00247399	0.000920743	0.000794656	0.00266287	0.00210193	0.00230602	0.00243215	0.00297003	0.00248756	0.00162382	0.00221941	0.00371388	0.00257222	0.00181942	0.00257408	0.00247107	0.00248789	0.00304959	0.0017703	0.00218223	0.00101841	0.00121022	0.00125743	0.00079422	0.00192716	0.00208523	0.000616895	0.00206007	0.00216833	0.00235559	0.00276523	0.0049069	0.00135772	0.00169123	0.00171632	0.00168357	0.00220797	0.00200922	0.00100967	0.00167941	0.000408786	7.09435e-05	0.00486271	0.000508145	0.00293979
TAGCG	0.00306522	0.00345475	0.00220585	0.0026145	0.00296096	0.00160045	0.0012574	0.00298407	0.0025625	0.00240097	0.00288119	0.00336128	0.00280698	0.00193582	0.00285226	0.00395621	0.00287121	0.00218211	0.00310367	0.00246832	0.00261826	0.00414789	0.00227541	0.00253447	0.00104116	0.00207529	0.00165823	0.00184196	0.00281401	0.00293097	0.00117886	0.00306954	0.00201324	0.00218879	0.00307963	0.00527609	0.00148231	0.00253164	0.00202695	0.0018403	0.00265218	0.00289528	0.00107864	0.0015772	0.000523498	0.000314629	0.00404186	0.00119161	0.00302552
GTAGC	0.00367784	0.00484797	0.00240984	0.00279307	0.00360437	0.00204964	0.00155823	0.0039768	0.00290075	0.00332647	0.00345067	0.0035088	0.00350135	0.00277012	0.00302747	0.00517309	0.00332517	0.0028513	0.00334424	0.0032596	0.00404627	0.00462863	0.00235963	0.00335354	0.00177429	0.00248532	0.00227881	0.00204216	0.0027935	0.00310745	0.00169157	0.00362096	0.00285509	0.00282529	0.00324423	0.0151863	0.00220962	0.00288415	0.0021603	0.00236799	0.00272795	0.00317759	0.00115089	0.00145767	0.000668331	0.00643248	0.00408093	0.000611304	0.00336966
AGTAG	0.00739249	0.00592469	0.00502927	0.00357336	0.00544062	0.00692716	0.00477967	0.00493958	0.00423378	0.0039011	0.00547541	0.00527792	0.00453386	0.00533499	0.0049801	0.00504344	0.00518877	0.00636406	0.00437159	0.00467703	0.00501264	0.00470991	0.00391433	0.00416805	0.00230266	0.00401849	0.0041447	0.00328673	0.00614831	0.00425396	0.00471704	0.00759933	0.00621832	0.00354321	0.00725612	0.00711799	0.00274849	0.00657755	0.0088223	0.00431991	0.00725375	0.00655372	0.00276534	0.00348185	0.00711311	0.00692328	0.00634726	0.0023522	0.00651643
CAAGT	0.00395777	0.00406688	0.00308048	0.00287294	0.00334817	0.00232019	0.00301065	0.00350636	0.00378418	0.00401748	0.0046139	0.00380556	0.00362644	0.00230907	0.00339863	0.00437321	0.00397826	0.00383397	0.00404499	0.00312789	0.0035915	0.00373995	0.00366028	0.00360335	0.00230472	0.00251078	0.00429052	0.00170503	0.00361116	0.00372097	0.00139045	0.00282157	0.0026132	0.0039237	0.00429725	0.00606922	0.00221736	0.00351211	0.00288527	0.00338157	0.00411883	0.00402577	0.00480869	0.00804404	0.00245789	0.000906121	0.00537873	0.0030557	0.00371981
CCAAG	0.00284931	0.00380849	0.00191766	0.00341328	0.00291965	0.00162077	0.00244501	0.00318442	0.0028176	0.00315742	0.00324338	0.00342414	0.00348623	0.00174005	0.00278807	0.00439354	0.00330774	0.00248676	0.00315402	0.00325964	0.00341559	0.00315799	0.00290818	0.00320435	0.00232699	0.00220582	0.00361949	0.00226362	0.00191349	0.00263371	0.00157093	0.0023718	0.00264879	0.00392251	0.00341569	0.00536603	0.0028107	0.00265619	0.00223082	0.00346294	0.00309914	0.00257918	0.00109122	0.0021416	0.000409088	0.000874515	0.00393528	0.00118604	0.00298874
GCCAA	0.00274405	0.00349149	0.00187211	0.00258281	0.00267412	0.00143555	0.00220207	0.00275918	0.00280052	0.00282275	0.0031936	0.00320258	0.00322748	0.00180701	0.00273223	0.004127	0.00328888	0.00270443	0.00314625	0.00278628	0.00311813	0.00294668	0.00279991	0.00300097	0.00232705	0.00195372	0.00304737	0.00195893	0.00200623	0.00250649	0.000997276	0.00236658	0.00236924	0.00323128	0.00345233	0.00497673	0.00245689	0.00252835	0.00212743	0.00265468	0.00352664	0.00284101	0.0010273	0.00195772	0.000320276	0.00201484	0.00391749	0.000869677	0.00303459
AGCCA	0.00435605	0.00578049	0.00590838	0.00691817	0.00563494	0.00455999	0.0059575	0.00616075	0.00650654	0.00546142	0.00632926	0.00586202	0.0065545	0.0049799	0.00618436	0.00702897	0.00605324	0.00686321	0.00708634	0.00495653	0.00475841	0.00686679	0.0073099	0.00484961	0.00524219	0.00567911	0.00760533	0.00597785	0.00585521	0.00776499	0.00390988	0.0047836	0.00424732	0.00645971	0.006111	0.00712282	0.00525257	0.006197	0.00460527	0.0063047	0.00645722	0.00629565	0.0052182	0.00362169	0.00103465	0.0147764	0.00719335	0.00227989	0.00370159
ACCAG	0.00700001	0.00578196	0.00517539	0.00429117	0.00533885	0.00676535	0.00576449	0.00515595	0.00473392	0.00522818	0.00638513	0.00461193	0.00449411	0.00525952	0.00538313	0.00498075	0.00516018	0.00629726	0.00474415	0.00483409	0.00580299	0.00488748	0.00562391	0.00517931	0.00292791	0.00446694	0.0060355	0.0041332	0.00638705	0.00486044	0.00529392	0.00754283	0.00678588	0.00422768	0.00704384	0.00706486	0.00336547	0.0069589	0.00851989	0.00450949	0.00751733	0.00693593	0.00582042	0.00899929	0.00884748	0.000847809	0.0068539	0.00311122	0.00680472
AACCA	0.00403054	0.00408868	0.00269903	0.00321678	0.00332318	0.00250447	0.00321123	0.00350102	0.00318116	0.00331307	0.0041867	0.00446102	0.00372937	0.00252119	0.00347883	0.00446033	0.00447549	0.00436896	0.00398138	0.00391919	0.00361795	0.00344541	0.00315644	0.003249	0.00238417	0.002748	0.00454993	0.00241139	0.00279274	0.00292834	0.0017891	0.00342067	0.00337791	0.00410084	0.00454608	0.00544166	0.00256052	0.00373157	0.00359274	0.0131169	0.00455331	0.00387572	0.00177721	0.0021135	0.000525401	0.000942613	0.00450654	0.00195042	0.00309547
GAACC	0.00335511	0.00441503	0.00321811	0.00370307	0.00353734	0.00258347	0.00333214	0.00380474	0.00365527	0.00353373	0.00423676	0.00398389	0.00422755	0.00304116	0.00416663	0.0046702	0.00491738	0.00467904	0.00411919	0.00370618	0.00404927	0.00381284	0.0043698	0.0038976	0.00337458	0.00265255	0.0038691	0.00261083	0.00284798	0.00384748	0.00221005	0.00338894	0.00318264	0.00456775	0.00478586	0.00533628	0.00375902	0.00362602	0.00413697	0.00441434	0.00467555	0.00464789	0.00165805	0.00207889	0.000806555	0.000173856	0.00410702	0.00119055	0.00330469
TGAAC	0.00580992	0.00553233	0.00422206	0.00384754	0.0048707	0.00587421	0.00527814	0.0043893	0.00420327	0.00426825	0.0050192	0.00433558	0.00449864	0.00432575	0.0041796	0.00546	0.0046699	0.00393466	0.00437386	0.00469933	0.00550391	0.00429748	0.00454978	0.00483869	0.00332037	0.00407244	0.00520135	0.00377028	0.00552783	0.00428429	0.00477842	0.006549	0.00647565	0.00450986	0.00590106	0.00667056	0.00360473	0.00578127	0.00709324	0.00388921	0.00634879	0.00555614	0.0014857	0.00411357	0.00682917	0.000422006	0.00623089	0.0017399	0.00623542
CTGAA	0.00364988	0.00613663	0.00633439	0.00778982	0.0057236	0.00285209	0.00477061	0.00697814	0.00798991	0.00690904	0.00535976	0.00457271	0.00702571	0.00453444	0.00592977	0.00873475	0.00676746	0.00413284	0.00793411	0.00421709	0.00529976	0.00776147	0.0081181	0.00542019	0.00502485	0.0046483	0.00425933	0.00436277	0.00528753	0.00692158	0.0031915	0.0027508	0.00313231	0.00617573	0.00634216	0.00698021	0.00539728	0.00532277	0.00281407	0.00518864	0.00560315	0.00449086	0.00408595	0.00368021	0.000391324	0.00874159	0.00457811	0.00169544	0.00308423
TCTGA	0.00475558	0.0049203	0.00728538	0.00643938	0.00731898	0.00625823	0.00576478	0.00645002	0.00855758	0.00634221	0.00620941	0.00424544	0.00543881	0.00585459	0.00636938	0.00740463	0.00674746	0.014533	0.00743157	0.00596328	0.00489133	0.00662577	0.00596551	0.00494104	0.00328424	0.00593071	0.00421547	0.00420338	0.00828032	0.00822351	0.00519024	0.00548916	0.0137532	0.00422504	0.00840732	0.00724581	0.00437541	0.00779266	0.0076091	0.00500438	0.00866804	0.0076075	0.00338451	0.00477328	0.00678715	0.00112784	0.00479093	0.00245863	0.00494569
ATCTG	0.00014609	0.000155568	0.00019408	0.00024554	0.000238007	2.47881e-05	8.5971e-05	0.000149714	0.000205998	0.000204874	0.000145194	0.000136864	9.0751e-05	0.000119483	0.000226169	9.7465e-05	0.000210492	0.000314726	0.000426037	0.000157269	1.54462e-05	0.000626734	0.000329234	0.000139252	9.59688e-05	0.000286505	0.000213584	0.000149371	0.000231094	0.000317264	0.000181177	0.000156047	0.00948807	8.10675e-05	0.000115125	0.000221813	0.000180667	0.000432499	0.000173197	0.000141237	0.000218491	0.000432582	7.4638e-06	0.000157665	0.000115908	0.00591148	3.97719e-05	6.35814e-05	5.59294e-05
AATCT	0.00508524	0.00344979	0.00371732	0.00305217	0.00367641	0.00589606	0.00449128	0.00316099	0.00283889	0.00234525	0.00405694	0.0143202	0.00311352	0.00460612	0.00347243	0.00217031	0.002943	0.00438905	0.0125149	0.00352157	0.00340126	0.00271089	0.0025418	0.00290527	0.00254253	0.00398502	0.0035352	0.00274753	0.00482777	0.0031843	0.0047965	0.0155877	0.0153315	0.00238265	0.00433219	0.00297752	0.00195499	0.00515518	0.00667179	0.00304437	0.00527927	0.00509097	0.00291816	0.0026888	0.00798324	0.000796323	0.00494727	0.00197753	0.00358933
AAATC	0.000741304	0.000783523	0.00136747	0.000812592	0.000952625	0.000842606	0.000686565	0.000952401	0.00067102	0.00152978	0.00179754	0.000778461	0.000680542	0.00100071	0.00152831	0.000398792	0.00128694	0.00237561	0.00120878	0.00121333	0.000484117	0.00127356	0.00142126	0.000718039	0.000279058	0.000485654	0.000475762	0.000234676	0.000392792	0.000660844	0.000461715	0.00103382	0.000376007	0.000310019	0.00102961	0.00043676	0.00022444	0.00121117	0.00160064	0.000929382	0.00147495	0.00159005	0.00446059	0.00554677	0.00186978	3.28547e-05	0.000375489	0.000658641	0.000337712
AAAAT	0.000863774	0.0016851	0.00293161	0.00296292	0.00161058	0.000858948	0.00151694	0.00279101	0.00319431	0.0036059	0.00202384	0.00143971	0.00236344	0.00200937	0.00238669	0.00243606	0.00238252	0.00182942	0.00270171	0.0014244	0.00138645	0.00308826	0.00374585	0.00196907	0.0215003	0.00208467	0.00125931	0.00173279	0.00139787	0.00209881	0.00154455	0.000773567	0.000431122	0.00231759	0.00121372	0.000948756	0.00272148	0.00199353	0.000605024	0.00198018	0.000929231	0.00072524	0.00531881	0.00641665	0.00179553	0.00029292	0.0003643	0.00118975	0.000430656
GAAAA	0.00505644	0.00495718	0.00639535	0.00670824	0.00572732	0.0060819	0.005639	0.00624311	0.00629628	0.00641507	0.00552522	0.0038496	0.00508751	0.00532091	0.00546551	0.00558177	0.00643078	0.00422506	0.0053256	0.00480489	0.00542509	0.00462824	0.00604173	0.00524619	0.00532649	0.00602238	0.00409507	0.00486548	0.00713587	0.00624152	0.0068305	0.00561373	0.00453063	0.00468496	0.00652074	0.004765	0.00538238	0.00691591	0.0058924	0.00503054	0.00623983	0.0049911	0.00582858	0.00866053	0.00863956	0.000636971	0.00340822	0.00329675	0.00390715
TGAAA	0.000694606	0.00109686	0.00109771	0.0013159	0.00124961	0.000649222	0.00116305	0.000951219	0.00147202	0.00140823	0.000879388	0.000690072	0.000815456	0.000664828	0.00113533	0.00125553	0.00196635	0.00087532	0.00123792	0.00109066	0.00141543	0.00061111	0.000783506	0.00150892	0.002607	0.0014605	0.000727543	0.00115212	0.000661777	0.00073203	0.00197271	0.000401146	0.000572148	0.00173088	0.00101533	0.00095651	0.00180669	0.00123257	0.000360875	0.00193946	0.000835817	0.000565341	0.000235118	0.000414621	0.000161827	0.00813626	0.000367021	0.000729829	8.29556e-05
ATGGA	0.00554571	0.00411684	0.00517492	0.00564448	0.00630712	0.0163771	0.00643995	0.00485896	0.00568425	0.00568441	0.00673967	0.00521717	0.00494607	0.00430338	0.00601029	0.00547296	0.0159178	0.00469009	0.00596564	0.00563538	0.0054348	0.00428897	0.00510067	0.0056746	0.00460046	0.0056913	0.00571066	0.00498581	0.00664603	0.00630552	0.00605992	0.00567541	0.0052216	0.00531511	0.00698138	0.00691696	0.00399741	0.0072033	0.0170748	0.00558857	0.00761201	0.00726608	0.00563265	0.0094527	0.00853977	0.000912507	0.00611725	0.00317496	0.00520691
TCAAT	0.00447518	0.00568133	0.00350615	0.00425489	0.00489106	0.00251394	0.00285552	0.00463038	0.00376922	0.00469892	0.00498609	0.0047462	0.01376	0.00405458	0.00462015	0.00672072	0.0046667	0.00521723	0.00481895	0.00525334	0.00525923	0.00544105	0.00417385	0.00522434	0.00324025	0.00391524	0.00452201	0.00438861	0.00397581	0.00561075	0.00252198	0.0041185	0.00493838	0.0051007	0.00442518	0.00693366	0.00373033	0.00357783	0.00346823	0.00397486	0.00410168	0.00477994	0.00282252	0.0026653	0.00250795	0.000987333	0.00736282	0.00643783	0.00707961
AGGAA	0.00388245	0.0248238	0.00396532	0.0062959	0.00544072	0.0130792	0.00534876	0.00574	0.00522742	0.00556729	0.00486256	0.0057351	0.00654216	0.00333915	0.00518957	0.0063982	0.00555778	0.00427691	0.00586715	0.00620957	0.00591487	0.00554945	0.00440593	0.00574505	0.00650302	0.00501083	0.00681331	0.00620263	0.00447706	0.00542523	0.00359434	0.0041614	0.00379589	0.00959831	0.00456442	0.00758438	0.00615712	0.00438499	0.0125673	0.00665774	0.00420121	0.00505625	0.00203541	0.00300829	0.0011369	0.00877884	0.00524835	0.00283652	0.00421812
GAGGA	0.00343322	0.00603455	0.00426739	0.00696454	0.00556582	0.00314824	0.00486254	0.0054242	0.00478632	0.00582053	0.00583467	0.0055899	0.00626357	0.00343838	0.0058934	0.00622165	0.00572346	0.0044751	0.00560712	0.00619838	0.00567152	0.00531053	0.00521358	0.00567513	0.00517974	0.00549581	0.00666343	0.00507735	0.00551467	0.00720576	0.00286859	0.00360493	0.00312992	0.00797086	0.00631178	0.00696414	0.00501334	0.00399259	0.00328797	0.00567195	0.00463779	0.00551582	0.00554229	0.0092096	0.00278956	0.0172979	0.00530396	0.00210419	0.00382705
AGTGA	0.00882677	0.00901076	0.00703633	0.00708383	0.00857801	0.00843122	0.00806424	0.00807735	0.00699083	0.00828857	0.00943095	0.00979939	0.00794104	0.00765769	0.00817069	0.00911055	0.00885802	0.00869842	0.00776628	0.0178726	0.00940592	0.00637176	0.00696529	0.00895121	0.00911855	0.0074685	0.00905482	0.00756068	0.00747279	0.00659626	0.00978622	0.00916033	0.00941247	0.00894965	0.00895903	0.00907434	0.00783089	0.00848133	0.00934896	0.00912533	0.00904833	0.00810305	0.00666727	0.0098952	0.00915544	0.0011005	0.00935583	0.00459309	0.00752277
TACTG	0.00486799	0.00288857	0.00357182	0.00208737	0.00299642	0.00606523	0.00404153	0.00260904	0.00236055	0.00188264	0.00339708	0.00253339	0.00241655	0.0041466	0.00320992	0.00137984	0.00281323	0.00466367	0.00198467	0.00258785	0.0029069	0.0019056	0.00224811	0.00243921	0.00196032	0.00307846	0.00312116	0.00291814	0.00468451	0.0023694	0.00445311	0.00586051	0.0144063	0.00212092	0.0048159	0.00251507	0.00180206	0.00484051	0.00728358	0.00324432	0.00515551	0.00450058	0.00331003	0.00220085	0.00680693	0.00637961	0.0030738	0.00204114	0.00362184
CCTAC	0.00426987	0.00282385	0.00302002	0.00169696	0.00282682	0.0154015	0.00383123	0.00220437	0.001985	0.00192172	0.00294934	0.00191389	0.0018908	0.00348513	0.00237742	0.00111217	0.0121937	0.0034565	0.00179017	0.0018277	0.00254626	0.00172921	0.00223329	0.00220001	0.00218521	0.0122373	0.00295884	0.0035454	0.0046435	0.00249398	0.00450552	0.00522691	0.00449482	0.00212486	0.00464894	0.00259721	0.00180779	0.0045857	0.0158847	0.0118939	0.00477049	0.00459529	0.00121155	0.00215507	0.00681428	0.000562854	0.00287576	0.00222655	0.00367147
GATTC	0.00492433	0.00339889	0.00333763	0.00277596	0.00342263	0.0057352	0.00438366	0.00305526	0.00251625	0.00238533	0.00393926	0.00428459	0.00306802	0.00418661	0.00315667	0.00218175	0.00306585	0.0045618	0.00240174	0.00343363	0.00342352	0.00205259	0.00220616	0.00288702	0.00242318	0.00387243	0.0033066	0.0025967	0.00456556	0.00290471	0.00466585	0.00564275	0.00546987	0.00210426	0.00417689	0.00272265	0.00190387	0.00472904	0.00644535	0.00277938	0.00492413	0.00465976	0.00166674	0.00217713	0.00672986	0.000648313	0.00472237	0.00193198	0.00358431
AAGAT	0.00666619	0.0040742	0.0056724	0.00484478	0.00551736	0.00986533	0.00727189	0.00437327	0.00430858	0.00291347	0.00524969	0.00545814	0.00472157	0.00629845	0.00485678	0.0035683	0.00442054	0.00498177	0.0035006	0.00507566	0.00485481	0.00293602	0.00398297	0.00405145	0.00342255	0.00589032	0.0050739	0.00433231	0.00815086	0.00473767	0.00811925	0.00906927	0.0081452	0.00304707	0.00681607	0.00457241	0.00284859	0.00793444	0.011378	0.004083	0.00823692	0.00788505	0.00203045	0.00441084	0.0131084	0.00100502	0.00689214	0.0025617	0.00623355
GAAGA	0.0147608	0.0134563	0.0193338	0.0179717	0.0180886	0.0215757	0.0195195	0.0160383	0.0179623	0.0147411	0.0138956	0.0132081	0.015788	0.0182473	0.0162285	0.013666	0.0154165	0.0165583	0.0159412	0.0159297	0.0162368	0.0155281	0.0160936	0.0156204	0.0175527	0.0185343	0.0165684	0.0180115	0.0217327	0.0179828	0.0216609	0.019593	0.0171715	0.0148178	0.0180625	0.0132051	0.0163638	0.0205028	0.021998	0.0171108	0.0186339	0.0193568	0.0160315	0.0095419	0.0236135	0.0211368	0.013155	0.0187672	0.0187029
GCCGA	0.00339024	0.00213352	0.00258991	0.0023399	0.00212845	0.00491603	0.00430235	0.00192631	0.00231911	0.00212528	0.00291394	0.00136437	0.00185018	0.00285305	0.00211158	0.00101061	0.00183783	0.00199131	0.00154982	0.00195973	0.00324003	0.00140274	0.00279604	0.00285826	0.00245438	0.00294073	0.00386437	0.00428792	0.00416668	0.00227319	0.00441527	0.0045726	0.00435854	0.00321341	0.00338961	0.00194293	0.002912	0.00417249	0.00540759	0.00314994	0.0039991	0.00343454	0.000477145	0.0020649	0.0066343	0.000906073	0.00285034	0.00137019	0.00338827
TGCCG	0.00341507	0.00279761	0.00451684	0.00474015	0.00347335	0.0054162	0.00424465	0.00381643	0.00421066	0.00304496	0.00303632	0.00170636	0.00337975	0.00466727	0.00339182	0.00202708	0.00213036	0.00359967	0.00341988	0.00156547	0.00305971	0.00462479	0.00463141	0.00286164	0.00269669	0.00387278	0.00265273	0.00559125	0.00638672	0.00535085	0.00481376	0.00529941	0.00400569	0.00311048	0.00413901	0.0028762	0.0038666	0.00512998	0.00569323	0.0038803	0.00439457	0.00506568	0.00355397	0.00242994	0.00716067	0.00981543	0.00268733	0.00108278	0.00372075
TTGCC	0.00474535	0.00318723	0.00347711	0.00310124	0.00296063	0.00529491	0.00384721	0.00318797	0.00247012	0.00322502	0.00373031	0.00162683	0.00178632	0.00417357	0.00286085	0.00110965	0.00170974	0.00340449	0.00200236	0.00227379	0.00331428	0.003189	0.00300768	0.00287465	0.00266374	0.00347571	0.00277656	0.00342084	0.00506082	0.00317063	0.00536613	0.00633465	0.00515066	0.0018424	0.00338922	0.00302935	0.00245337	0.00463655	0.00534669	0.00254709	0.0039774	0.0039289	0.00453743	0.00703427	0.00858706	0.000436247	0.00397956	0.00140696	0.00438683
GTCCA	0.00504648	0.00461884	0.00702142	0.00622857	0.00739119	0.00685869	0.00616041	0.00617881	0.00771613	0.00741244	0.0065945	0.00374159	0.00518758	0.00539445	0.00676661	0.00727097	0.0168375	0.00566712	0.00713828	0.00568654	0.00541574	0.00622056	0.00655135	0.00589444	0.00607339	0.0063721	0.00455379	0.00614629	0.00742745	0.00741473	0.00728436	0.00556367	0.00467255	0.00570541	0.00734427	0.00706815	0.00647794	0.00751552	0.00748663	0.00673997	0.00751239	0.0065541	0.00861563	0.00926546	0.00848236	0.00230583	0.00488434	0.00335893	0.00522703
CGTCC	0.00857926	0.00652043	0.00635875	0.00468872	0.00797349	0.0104943	0.00701267	0.00623069	0.00624403	0.00498575	0.00777495	0.00673931	0.00519516	0.00713184	0.00678561	0.00708998	0.00628139	0.00650976	0.00621226	0.00686809	0.00675149	0.00583469	0.00512256	0.00608495	0.00421247	0.0070217	0.00607503	0.00510496	0.0102369	0.00842828	0.00874752	0.0108338	0.00971003	0.00412658	0.0102309	0.0101936	0.00443865	0.00963002	0.0130266	0.00521737	0.011117	0.0098016	0.00333665	0.00617303	0.0133454	0.00128821	0.00988485	0.00431211	0.0106337
CTTCC	0.00692797	0.00660289	0.00799241	0.00927854	0.00809307	0.00908512	0.00929111	0.00807073	0.00788725	0.00776838	0.00696405	0.00786618	0.00919921	0.00775307	0.00892061	0.00827866	0.0083761	0.00839708	0.00758652	0.00878343	0.00769835	0.00740603	0.00621972	0.00768888	0.0102626	0.00938601	0.010025	0.00977814	0.00931655	0.00878708	0.00939943	0.00870885	0.00715362	0.0097298	0.00814735	0.00918269	0.00998326	0.00877684	0.00811326	0.0101814	0.00716386	0.0078285	0.00748265	0.00473334	0.00871567	0.00289827	0.00623362	0.01043	0.00928681
ACTTC	0.00413931	0.00337052	0.00321652	0.00515819	0.00398063	0.00591276	0.00616947	0.00367091	0.00423966	0.00435316	0.0042692	0.00400523	0.00398544	0.00323439	0.00421366	0.00336753	0.00441222	0.00219546	0.00421956	0.00361401	0.00511692	0.00288455	0.00336868	0.00561436	0.00451962	0.00473115	0.00538413	0.0042786	0.00543266	0.00445113	0.005568	0.00520558	0.00452472	0.00339196	0.00507075	0.00541027	0.00411457	0.00543061	0.00469876	0.00461361	0.00437835	0.00433619	0.00275133	0.0026632	0.00675301	0.000383343	0.00264552	0.00214667	0.00453835
GACTT	0.00665809	0.00602626	0.00614917	0.00587091	0.00619205	0.00670875	0.00622886	0.00648126	0.00632208	0.00697837	0.00776523	0.00453025	0.00489845	0.00579729	0.00565641	0.00710036	0.00635262	0.00602219	0.00624443	0.00573977	0.00563391	0.00656706	0.00670354	0.0059054	0.00263297	0.00576335	0.00571972	0.00385203	0.00728667	0.00691519	0.00465632	0.00683332	0.00681315	0.00392374	0.00708416	0.00675361	0.00334558	0.00736183	0.00771168	0.00410819	0.00778916	0.00670677	0.00705401	0.00986836	0.00875914	0.000818128	0.00687269	0.00283054	0.00560829
AGACT	0.00453834	0.00335326	0.00522423	0.00479836	0.00579834	0.00631778	0.00467382	0.00443047	0.00482676	0.00508468	0.00569467	0.00322135	0.00361458	0.0039781	0.00568318	0.00523434	0.0053824	0.00444354	0.00499487	0.00425911	0.00465695	0.00455351	0.00416618	0.00471777	0.00356616	0.00541318	0.00425713	0.005963	0.00729792	0.00659164	0.00572547	0.0058968	0.00439088	0.0132032	0.00647269	0.00674627	0.0045609	0.00687306	0.00744162	0.00505817	0.00744205	0.00695647	0.00555639	0.0087021	0.00856924	0.000919517	0.00517756	0.00297078	0.00534641
TAGAC	0.000253967	0.000254056	0.000820248	0.00122151	0.000736826	0.000625418	0.00038586	0.000522165	0.000480446	0.000321558	0.000470011	0.000178716	0.000491417	0.000272023	0.000793155	0.000347174	0.000558892	0.000289377	0.000615394	0.00016635	0.000282031	0.00105357	0.000616883	0.00033148	0.000181753	0.000894536	0.000245137	0.00118749	0.00130439	0.00103046	0.000430374	0.000692195	8.281e-05	0.00940718	0.000395372	0.000734921	0.000498959	0.000961282	0.000389408	0.000326739	0.000716833	0.00111159	0.000148499	0.000131709	0.000129772	1.43647e-05	0.000276094	0.000231141	0.000173363
TTAGA	0.00159522	0.000590829	0.000684933	0.000523471	0.0012536	0.00139159	0.00110401	0.000771114	0.000824453	0.000505061	0.00163127	0.00100081	0.000822443	0.000586135	0.000670879	0.0013798	0.00122764	0.00131701	0.00130542	0.000925078	0.000441208	0.000133134	0.000363322	0.000350271	0.000398539	0.00114806	0.00226834	0.000183573	0.0012355	0.0015577	0.000553289	0.00080856	0.00119689	0.000477178	0.00129026	0.00115098	0.000168913	0.00160735	0.00133112	0.000978092	0.00139606	0.00223535	0.000473948	0.000683725	0.000419516	0.000444015	0.00266952	0.00192314	0.000448571
GGTTA	0.00106049	0.00108689	0.00232222	0.0108557	0.00111949	0.00122105	0.00178954	0.00106619	0.00237404	0.000948335	0.000970339	0.00126121	0.00194747	0.00201856	0.00181074	0.00115332	0.00171444	0.00317839	0.0015209	0.000722919	0.000625128	0.00194132	0.00191602	0.000398429	0.00117403	0.0010236	0.00103847	0.000557246	0.00164579	0.00191084	0.000708841	0.000891974	0.000423045	0.00110101	0.00148768	0.000615229	0.000665833	0.00170622	0.00160723	0.00182244	0.00187284	0.00200281	0.00119403	0.000340982	0.000200168	0.00179898	0.000544569	0.00130079	0.000337508
CGGTT	0.00105591	0.000587542	0.00122398	0.000967374	0.000909989	0.00117483	0.000984138	0.0008339	0.000857076	0.000661255	0.00106878	0.000832105	0.00148322	0.0011419	0.00123041	0.0015828	0.00171477	0.00181731	0.0014649	0.00108359	0.00149305	0.000497341	0.000570069	0.0011221	0.00123271	0.000665982	0.000998626	0.000678339	0.000573038	0.000452992	0.000582567	0.000852138	0.000683356	0.000772257	0.00118197	0.000673419	0.000939294	0.00107992	0.00157606	0.001343	0.00161858	0.00133921	0.00109607	0.00022624	8.49219e-05	0.000410795	0.000592732	0.000962521	0.000279122
TCGGT	0.00416206	0.00328214	0.00426132	0.00299499	0.00348544	0.00624607	0.00400234	0.00310635	0.00299313	0.00317696	0.00389433	0.00233795	0.00222595	0.00469412	0.00390912	0.00155482	0.00287424	0.00463489	0.00293874	0.00279368	0.00365053	0.00340186	0.00390224	0.00360757	0.00202799	0.0040027	0.0030083	0.00383989	0.00588021	0.00432123	0.00517088	0.00630556	0.00518282	0.00134095	0.00489915	0.00299407	0.00270039	0.00550822	0.00714934	0.00289971	0.0053087	0.00596105	0.0016046	0.00202664	0.00718991	0.000936106	0.0026645	0.00184474	0.00388053
CTCGG	0.00334953	0.00204691	0.00226166	0.00112881	0.00207998	0.00446873	0.00276811	0.0017184	0.00177012	0.00202054	0.00213051	0.00114113	0.000920525	0.0029703	0.00183514	0.000778867	0.00127238	0.00192835	0.00104974	0.00175155	0.00255936	0.0013497	0.00180623	0.00226989	0.00139979	0.00229153	0.00172266	0.00201113	0.00359539	0.00198543	0.00396692	0.00447483	0.00392129	0.00154117	0.00301163	0.00168588	0.00118935	0.00349298	0.0051036	0.00149835	0.00344691	0.00312958	0.000486153	0.00168875	0.00662486	0.000385608	0.00217097	0.000991965	0.00332281
GCTCG	0.00335246	0.00309407	0.00217919	0.00107984	0.00186909	0.00431041	0.00271672	0.00174091	0.00144515	0.00139711	0.00208716	0.00117133	0.000899841	0.00292284	0.00156454	0.000755637	0.00121642	0.00167057	0.000903244	0.00169576	0.00264887	0.00159803	0.00164195	0.00225554	0.00080151	0.0021429	0.00172675	0.00194401	0.00357747	0.00179365	0.00366916	0.00445768	0.00396873	0.000616195	0.00280712	0.00169996	0.000877798	0.0033874	0.00524609	0.00118882	0.00336546	0.0030839	0.000464766	0.00168834	0.0065035	0.000481457	0.00267823	0.000802992	0.00372879
TGCTC	0.0047809	0.00346237	0.0032508	0.00199627	0.00345395	0.00568229	0.00368368	0.00304974	0.00228218	0.0021983	0.00393393	0.00431857	0.00280074	0.00422426	0.00316682	0.00227883	0.00280179	0.00431503	0.00220979	0.00337082	0.00333546	0.00208892	0.00230522	0.00274066	0.00309251	0.00348896	0.00359878	0.00292992	0.00454332	0.00310494	0.00529466	0.00603757	0.00544157	0.00260377	0.00438081	0.00293886	0.00207293	0.00488445	0.00667937	0.00306762	0.00515454	0.00465819	0.00164833	0.00235974	0.00677805	0.000762736	0.0045768	0.00203194	0.00365402
TTGCT	0.00543042	0.00481824	0.00466893	0.00441092	0.00545936	0.00670447	0.00564956	0.00487644	0.00410403	0.00454111	0.00502614	0.00541256	0.00428982	0.00508529	0.00441521	0.00443095	0.00536869	0.0049814	0.0047909	0.00607312	0.00489635	0.00293979	0.00402034	0.00460992	0.00596212	0.00549633	0.00529238	0.00458731	0.00529991	0.00426593	0.00712983	0.00644408	0.00569929	0.00436244	0.0055502	0.00434374	0.00427553	0.00620639	0.00706849	0.00490143	0.00609591	0.00508127	0.00429242	0.00325973	0.00687828	0.00110292	0.00481123	0.00258448	0.00367338
GTTGC	0.00676785	0.00540137	0.00473036	0.00441382	0.00492412	0.00723685	0.00559581	0.0051696	0.00353457	0.00416555	0.0054101	0.00572528	0.00461104	0.00578673	0.00462478	0.004377	0.00452202	0.00555129	0.00439578	0.00560861	0.00467757	0.00379549	0.00405296	0.004183	0.00476652	0.00595083	0.00641017	0.00500435	0.00607592	0.0045885	0.00710102	0.00813461	0.00734153	0.00372551	0.00518898	0.00457098	0.0038243	0.0063732	0.00735711	0.00446573	0.00615549	0.00562725	0.00289569	0.00323147	0.00705179	0.000860767	0.00640928	0.00216317	0.00436369
CGTTG	0.00479885	0.00367618	0.00357281	0.00222809	0.00374222	0.00591778	0.00429305	0.00314349	0.00241198	0.00251915	0.00404222	0.00489639	0.00331505	0.00441967	0.00335773	0.00316635	0.00328885	0.00419475	0.00242735	0.00396697	0.00332921	0.00210603	0.002476	0.0027918	0.00292662	0.00385542	0.00482881	0.0028626	0.00456133	0.00308941	0.0053231	0.00617243	0.00592391	0.00266349	0.00463388	0.00305031	0.00230027	0.00490164	0.00675011	0.00312985	0.00524609	0.00470762	0.00166056	0.00257009	0.00678289	0.000672264	0.00460705	0.00197272	0.00365519
GCGTT	0.00485076	0.00395955	0.00358034	0.0021536	0.00387222	0.00594502	0.00427779	0.00340837	0.00241357	0.00285242	0.00416008	0.00483376	0.00348569	0.00453398	0.00366904	0.00332363	0.00333522	0.00407746	0.00244741	0.00416268	0.00370652	0.00239734	0.0219361	0.00302334	0.00282925	0.00379673	0.00467055	0.00276356	0.00464924	0.0030895	0.00528862	0.00632044	0.0056463	0.00246827	0.00452328	0.00358782	0.00215865	0.00489182	0.00682434	0.00308919	0.00531789	0.0049291	0.00177689	0.00273711	0.00677965	0.000902405	0.0046014	0.00206244	0.00372228
ACTCA	0.00513777	0.00395183	0.00386313	0.00220321	0.00387081	0.00595038	0.00386546	0.00384991	0.00281162	0.00335254	0.00489377	0.00598508	0.00330501	0.00474962	0.00389512	0.00237946	0.00291777	0.00490892	0.0029457	0.00402839	0.00437653	0.00265322	0.00335918	0.00440731	0.0034108	0.00375181	0.00464733	0.00262033	0.0047377	0.00316593	0.00560722	0.0065889	0.0064834	0.00175919	0.00467961	0.00304606	0.00254349	0.00498661	0.00667455	0.00298974	0.00516626	0.00462703	0.00547963	0.00765822	0.00863307	0.000634711	0.00470437	0.00247532	0.00405221
CACTC	0.0108158	0.00715493	0.00785745	0.00419138	0.00770566	0.0144691	0.00912924	0.00687747	0.00520832	0.00570544	0.00844139	0.00661073	0.0043643	0.00973289	0.00701931	0.00343508	0.00480513	0.00827797	0.00447525	0.0263938	0.008591	0.00527984	0.00654611	0.00746393	0.00365376	0.00742335	0.00744751	0.00601257	0.0120139	0.00704069	0.0116636	0.0148324	0.0141103	0.00231506	0.00990257	0.00633492	0.00362074	0.011606	0.0164089	0.00458238	0.0117357	0.0107877	0.00633452	0.0109057	0.0216188	0.00100371	0.00895527	0.00367283	0.0079565
TTCAC	0.00806572	0.00614297	0.00687362	0.00582976	0.00687896	0.011632	0.00941741	0.00566669	0.00576316	0.00470779	0.00673464	0.00645207	0.00631901	0.00768857	0.00592257	0.0040332	0.00508405	0.00674583	0.00520186	0.0063195	0.00690784	0.00464341	0.00574583	0.00664266	0.00651425	0.00717914	0.00790453	0.007322	0.0104503	0.00702549	0.0100213	0.0111726	0.00998826	0.00490715	0.00844966	0.00568249	0.00548411	0.00968337	0.0124217	0.00643235	0.00994038	0.00988002	0.00330287	0.00478659	0.0138411	0.00937066	0.00567594	0.00346078	0.0071318
ACCTT	0.00462275	0.00326207	0.00384524	0.00300037	0.00393463	0.00558723	0.00439835	0.0226533	0.00394254	0.00253106	0.00317093	0.00277394	0.00320148	0.00403026	0.00296504	0.00292464	0.00336663	0.00312814	0.00276624	0.00363619	0.00309314	0.00187191	0.00306049	0.00280247	0.00457928	0.00411516	0.00494054	0.00491244	0.00632084	0.00540968	0.00602588	0.00497418	0.00449933	0.00346342	0.0058421	0.00382053	0.013449	0.00548988	0.00570971	0.00367514	0.00571492	0.00583958	0.00403216	0.00347206	0.00726855	0.0094895	0.00432293	0.00242853	0.0040375
AAAAC	0.00423635	0.0027738	0.0034616	0.0023987	0.00379229	0.00580964	0.00460185	0.00274895	0.00320742	0.00273861	0.00322546	0.00170432	0.00190846	0.00345254	0.00244564	0.00209533	0.00376774	0.00283111	0.00277273	0.003445	0.00378061	0.00201118	0.0023995	0.00336899	0.00388804	0.00421173	0.00402882	0.00278607	0.00529986	0.00333215	0.00559799	0.00500809	0.00421442	0.00260002	0.00433884	0.0034636	0.00267298	0.00501412	0.0057828	0.00436494	0.00451805	0.00468431	0.00199886	0.0020156	0.00691438	0.000496804	0.00320012	0.00303148	0.00359324
TCCGA	0.00399713	0.00311606	0.00337922	0.00270625	0.00383804	0.00526284	0.0044531	0.00284857	0.00331316	0.00291734	0.00295047	0.00176652	0.00223559	0.00346739	0.00274543	0.00245486	0.00359946	0.00233728	0.00235007	0.00360662	0.00372654	0.00197788	0.0025028	0.0034429	0.00449893	0.0035473	0.00355703	0.00446125	0.00491939	0.00281959	0.00643095	0.00503021	0.00428764	0.00371255	0.00414194	0.00322823	0.00385265	0.00468156	0.00528219	0.00395192	0.00438936	0.0035957	0.00222011	0.00215893	0.00680492	0.00098263	0.00296206	0.00233071	0.00342925
ATCCG	0.00381654	0.00219092	0.00266855	0.00130583	0.00286427	0.00482697	0.00378783	0.00199953	0.00227054	0.00162042	0.00222451	0.00170064	0.00162191	0.00305984	0.00165091	0.00130175	0.00185778	0.00171447	0.00146127	0.00304058	0.0030923	0.00137208	0.0018235	0.00263282	0.00268563	0.00267404	0.0030971	0.00213338	0.00419848	0.00201581	0.00490972	0.00473791	0.0041283	0.00174662	0.00361721	0.00266377	0.00162628	0.00395628	0.00506724	0.00163151	0.00374982	0.00334351	0.00213184	0.00213498	0.00665649	0.000595651	0.00274632	0.0017569	0.00337231
GATCC	0.00441327	0.00360501	0.00588423	0.00435882	0.00481807	0.00578184	0.00539893	0.00458051	0.0054725	0.00603969	0.0046436	0.00242464	0.00385072	0.00490704	0.00441416	0.00353602	0.00421031	0.00401138	0.00431033	0.00432365	0.00452043	0.00461905	0.00627022	0.00466443	0.00552903	0.00474278	0.00400794	0.0048772	0.00571566	0.00457767	0.00668701	0.00518118	0.00444402	0.00452549	0.00447661	0.00326251	0.00498227	0.00549901	0.00545862	0.00467331	0.0045131	0.00409532	0.0111337	0.0134973	0.0103064	0.00195551	0.00342541	0.00326423	0.00406351
CGATC	0.00346032	0.00210597	0.00246622	0.00119274	0.0023375	0.00463842	0.00339504	0.00176809	0.00180319	0.00151717	0.00213278	0.0016007	0.00161267	0.00295391	0.00158998	0.00136048	0.00174499	0.00175691	0.00119022	0.00208078	0.00244426	0.00131427	0.00181866	0.00202608	0.00168307	0.00249898	0.00270141	0.00197326	0.0041682	0.00204855	0.00427221	0.00462113	0.00394092	0.00174084	0.00294965	0.0021018	0.00127943	0.00363029	0.00501126	0.001564	0.0035014	0.00329371	0.000484309	0.00210718	0.00666189	0.000593257	0.00269858	0.00163476	0.003335
ACGAT	0.00382504	0.00349878	0.00357382	0.00250748	0.0134833	0.0053028	0.00460718	0.00286739	0.00296551	0.00320415	0.00285593	0.00218947	0.00277981	0.00348132	0.0126624	0.00359651	0.00395514	0.00224828	0.00241928	0.00346767	0.00349198	0.00204619	0.00273968	0.00318258	0.00305817	0.00398129	0.00375246	0.00287717	0.00488858	0.0123787	0.0142876	0.00519409	0.00419551	0.00200376	0.00346863	0.00343455	0.00227796	0.00441955	0.00541533	0.0030164	0.00407026	0.00386872	0.000711442	0.00260882	0.00674833	0.000628845	0.002877	0.00216181	0.00361012
TACGA	0.00613865	0.00506189	0.00363117	0.0022733	0.0140495	0.00631777	0.00495751	0.00400739	0.00294577	0.00365751	0.00441239	0.00419601	0.00361257	0.00452376	0.0135496	0.00456953	0.00406487	0.00485785	0.00298662	0.00492276	0.00517361	0.0037909	0.00278758	0.00453372	0.00290132	0.00387244	0.00437466	0.00338125	0.00495915	0.0120398	0.0138519	0.00719879	0.00605739	0.00269665	0.00470063	0.00645502	0.0021917	0.00506698	0.00790179	0.00345937	0.00517989	0.00504575	0.00207812	0.00241123	0.00690977	0.00108617	0.00566735	0.00237982	0.00597868
TTACG	0.00423701	0.00309386	0.00402815	0.0120893	0.00363648	0.00599732	0.0046128	0.0126159	0.00294749	0.00295099	0.0130542	0.00278997	0.00330292	0.0138413	0.00274993	0.00362283	0.00348146	0.00425179	0.00262906	0.00395818	0.0133141	0.011572	0.0024509	0.0128718	0.00273953	0.00335856	0.0126867	0.00333595	0.0047534	0.00314611	0.00492745	0.00570685	0.00460185	0.00360448	0.0135429	0.00296983	0.00222156	0.0138968	0.0069743	0.00389324	0.00538262	0.00497993	0.00130889	0.00262269	0.00687204	0.00100684	0.00308099	0.00233703	0.00356633
GAGCT	0.00442208	0.00376355	0.00323597	0.001985	0.00315927	0.00514944	0.00344646	0.0031001	0.00206325	0.00221213	0.00343339	0.00331529	0.00214155	0.00443327	0.00321352	0.00233989	0.00265859	0.00380731	0.00181724	0.00352942	0.00408082	0.00205072	0.00230056	0.00355606	0.00224797	0.0036141	0.00386826	0.00223204	0.00400975	0.0025806	0.00519269	0.00619332	0.00623892	0.00129389	0.00385094	0.00243063	0.00258516	0.00422187	0.00610741	0.0021073	0.00451663	0.00390309	0.0017298	0.00211653	0.00662289	0.000503201	0.00405551	0.00111164	0.00380479
AGAGC	0.00542198	0.00438867	0.0039208	0.00321353	0.00432382	0.00603957	0.00535817	0.00396182	0.00304628	0.00327458	0.0047474	0.00447128	0.00333986	0.00504754	0.00366725	0.00387835	0.00357019	0.00477988	0.00287562	0.00428396	0.0244254	0.00252219	0.00382061	0.00462045	0.00344687	0.00445651	0.0062323	0.00329188	0.00461723	0.00346248	0.00559982	0.00678209	0.00772075	0.00248952	0.00465823	0.00349705	0.00290042	0.00511097	0.00643429	0.00304569	0.00552061	0.00451969	0.00169776	0.00270539	0.00680262	0.000427304	0.00601523	0.00156476	0.00403473
CAGAG	0.00490952	0.00372999	0.00447219	0.00242318	0.00437436	0.00617344	0.00484904	0.00376284	0.00287046	0.00280534	0.0043443	0.00395511	0.00370582	0.00547828	0.00474697	0.00266279	0.00336149	0.00440459	0.0025393	0.00529731	0.00463771	0.00319274	0.00346958	0.00363999	0.00273727	0.0047435	0.0047025	0.00353956	0.00527307	0.00388569	0.00560573	0.0063246	0.00629312	0.00220662	0.00626859	0.00315668	0.00251998	0.0051337	0.00693203	0.00311461	0.00535487	0.00506146	0.00411785	0.0029171	0.00909026	0.0011411	0.00512074	0.0129762	0.0102203
ACAGA	0.0054199	0.00553534	0.00675733	0.00557663	0.00743007	0.00768212	0.0065925	0.00507552	0.00555854	0.00517367	0.00556171	0.00449324	0.00528525	0.00632669	0.00694336	0.00617823	0.0074279	0.0158869	0.00566516	0.00724789	0.00560709	0.00555668	0.00567015	0.00542261	0.00605089	0.00728766	0.00591696	0.00590297	0.00796777	0.00700452	0.00850685	0.00744475	0.0061067	0.00391182	0.00705247	0.00479882	0.00468357	0.00725185	0.00782777	0.00617398	0.00713972	0.007195	0.00461557	0.00281425	0.00852303	0.00115682	0.00514078	0.00829397	0.00719563
AACAG	0.00571211	0.00421892	0.00529219	0.00431328	0.00533448	0.00750767	0.00582583	0.0045708	0.00387157	0.0041093	0.00542908	0.00396499	0.00452243	0.00520214	0.00489557	0.00480835	0.00599177	0.00533456	0.00491849	0.00564862	0.00426625	0.00373907	0.00500964	0.00415897	0.0035373	0.00535093	0.00534427	0.00372557	0.00631676	0.00501323	0.00646607	0.00664607	0.00600137	0.00224879	0.0060651	0.00381208	0.00257565	0.00691737	0.00817215	0.00495755	0.00685232	0.00690313	0.00833463	0.00363285	0.00803993	0.0029495	0.00531158	0.00870297	0.00707003
CAACA	0.00470549	0.00338409	0.00428309	0.00451364	0.00435322	0.00622196	0.00472671	0.00382177	0.00309304	0.00405717	0.0036064	0.00237283	0.00308362	0.00395983	0.00358681	0.00329069	0.0046114	0.00418423	0.00384749	0.00458889	0.00382745	0.00231574	0.00375393	0.00381864	0.00299168	0.0039779	0.00361839	0.00397179	0.00508794	0.00322368	0.00518656	0.00557072	0.00444869	0.00267553	0.00428269	0.00272594	0.00250673	0.00537192	0.00664906	0.00402813	0.00546094	0.00480764	0.00475966	0.00288926	0.00674359	0.00394138	0.00283962	0.00239029	0.00342842
CTTAC	0.00652637	0.00459085	0.00501184	0.00261753	0.00448279	0.00909849	0.00587133	0.00386101	0.00392361	0.00345921	0.00450905	0.00323224	0.00269408	0.00623999	0.00332607	0.00234708	0.00295756	0.0040372	0.00288657	0.00397937	0.0155342	0.00293838	0.00365813	0.00487085	0.00203039	0.00406289	0.00421541	0.00512016	0.00768065	0.00402093	0.00786923	0.00926354	0.0086879	0.00334635	0.00617562	0.00396226	0.00236349	0.00722461	0.0100688	0.00352657	0.00732615	0.00653357	0.00265852	0.00373605	0.0131962	0.00142891	0.00471576	0.00190995	0.00673552
TCTTA	0.00443825	0.00219927	0.00479267	0.00321195	0.00385661	0.00906039	0.00688272	0.00212406	0.0036825	0.00214581	0.00356762	0.00282114	0.00271748	0.00469903	0.00371782	0.00151469	0.00264652	0.00176667	0.00265796	0.00261453	0.0143895	0.00192105	0.00442486	0.00420734	0.00333097	0.00421766	0.00443227	0.00512546	0.00762439	0.0043987	0.00787714	0.0073944	0.00652375	0.00319543	0.00598351	0.00375655	0.00377183	0.00730792	0.010321	0.00358129	0.00732394	0.00693902	0.000966687	0.00396623	0.0126995	0.000458328	0.00459862	0.00322839	0.00587289
TCTCT	0.00369956	0.00156383	0.00385867	0.00265693	0.00271341	0.00593442	0.0044341	0.00168547	0.00239903	0.00131265	0.00234127	0.0118617	0.00239081	0.00448641	0.00293728	0.00100879	0.00225894	0.00293805	0.00175915	0.00214215	0.00308449	0.00146815	0.00203733	0.00230532	0.0016643	0.00352643	0.00342801	0.00267587	0.00544145	0.00330553	0.00403273	0.00489394	0.00471082	0.00152572	0.00399695	0.0023304	0.00147529	0.00448376	0.00639034	0.00250947	0.00487294	0.00497019	0.00476695	0.00364509	0.00995086	0.000559311	0.00332929	0.0125395	0.0100177
GTTCT	0.00387789	0.00323415	0.00343651	0.0023852	0.0035124	0.00590063	0.00405831	0.00296651	0.00267793	0.002386	0.003534	0.00217038	0.00242993	0.00410213	0.00286785	0.00220758	0.00296114	0.00338072	0.00252525	0.00271198	0.00314913	0.00305503	0.00265442	0.00291324	0.00153874	0.00338548	0.00332714	0.00370151	0.00587212	0.00436891	0.0043928	0.00569055	0.00426446	0.00157878	0.00435585	0.00320167	0.00162752	0.00498932	0.00625473	0.00258712	0.00488347	0.00596222	0.000652132	0.00260086	0.0072594	0.000702627	0.00315182	0.00179585	0.00375894
CGTTC	0.00330468	0.00236665	0.00245818	0.0012698	0.00224588	0.00457933	0.00309298	0.00182642	0.00170833	0.00166062	0.00206945	0.00145538	0.00176627	0.00300836	0.00160994	0.00158068	0.0015648	0.00179435	0.00125647	0.00210263	0.00235273	0.00135631	0.00182197	0.00206771	0.00181716	0.00219329	0.00232136	0.0022783	0.00371689	0.00182964	0.00389446	0.0045661	0.00408052	0.00146661	0.00294258	0.00190504	0.00148861	0.0034978	0.00504299	0.00148069	0.00364171	0.00316507	0.000581096	0.00244821	0.00660472	0.000254943	0.00228567	0.000951432	0.0033091
TCGTT	0.00323008	0.00227502	0.00283698	0.00143747	0.00245225	0.00444989	0.0029904	0.00207153	0.00164002	0.00259924	0.00267111	0.00124492	0.00161751	0.00294415	0.00215659	0.00133991	0.00147313	0.0024412	0.00145316	0.00225065	0.0025451	0.00186611	0.00258196	0.00222924	0.00163911	0.00220273	0.00200418	0.00243927	0.0036617	0.00210297	0.00324143	0.00433092	0.00400024	0.00133113	0.00294241	0.00184036	0.00191257	0.00346092	0.0050866	0.00155353	0.00354818	0.00319697	0.00422471	0.00754792	0.00836268	0.000194909	0.00255078	0.00120196	0.00131832
CTCGT	0.00341335	0.00239192	0.00268283	0.00125085	0.00249149	0.00440787	0.00302301	0.00239735	0.00167787	0.00312425	0.00304582	0.00122561	0.00140342	0.00310018	0.00286922	0.000850408	0.00114436	0.00281413	0.00148303	0.0021823	0.00333579	0.00206749	0.00284113	0.00296466	0.00101801	0.00200253	0.00181257	0.00268707	0.00417418	0.00294141	0.00299325	0.00449478	0.00433199	0.00140197	0.00313162	0.00255045	0.00140728	0.00347591	0.00541167	0.00161432	0.00357284	0.00365112	0.00433449	0.00694673	0.00833933	0.000244396	0.00277853	0.00138727	0.00127046
ACTCG	0.00293302	0.00185428	0.00211046	0.00106905	0.00188972	0.00422934	0.00287433	0.00157426	0.00134678	0.00164396	0.00211939	0.00100845	0.000935503	0.00251006	0.00165444	0.000624241	0.000967882	0.00168169	0.000967633	0.0214296	0.00254501	0.00139325	0.00177589	0.00215684	0.000362248	0.00189639	0.00167858	0.00183536	0.00363841	0.00188812	0.00281139	0.00411194	0.00394151	0.000880919	0.0028136	0.00167837	0.000864537	0.00341369	0.00501605	0.00113566	0.00333439	0.00305624	0.000455449	0.00166654	0.00660953	0.00825046	0.00211309	0.00086249	0.000777502
ACACT	0.00587587	0.00369394	0.00421366	0.00211007	0.00441944	0.00855034	0.00514916	0.00347025	0.00284522	0.0026201	0.00384584	0.00193211	0.00170326	0.0053383	0.0031825	0.00116229	0.00200968	0.00347705	0.00201586	0.0137116	0.00444596	0.00289952	0.00329639	0.00365818	0.00158406	0.00377541	0.00286771	0.0037616	0.00697942	0.00387594	0.00654772	0.00839747	0.00760398	0.00139786	0.00535303	0.00356131	0.0016765	0.0066184	0.00965798	0.0021609	0.00666717	0.00618133	0.000879696	0.003252	0.0131353	0.00059804	0.00299816	0.00130856	0.00401426
CACAC	0.0080688	0.00607276	0.00596215	0.00440798	0.00728646	0.0103661	0.0272798	0.0246199	0.00590625	0.00534162	0.00675561	0.00336253	0.0045672	0.00688021	0.00476382	0.00445339	0.00604532	0.00547849	0.00532384	0.00706422	0.00713222	0.00408371	0.00526595	0.00655996	0.00646646	0.00577292	0.00518446	0.00681429	0.00807023	0.00524915	0.010121	0.00979795	0.00952895	0.00502227	0.00796669	0.00544578	0.0057168	0.00902504	0.011261	0.00634839	0.00897562	0.0085485	0.00436172	0.00411547	0.0132857	0.0179394	0.00505272	0.00239316	0.00681346
CTCTC	0.0042726	0.00311173	0.0030069	0.0021898	0.0037708	0.00572263	0.0042522	0.0028354	0.00250713	0.00326117	0.00357192	0.00240033	0.00225645	0.00402207	0.00275885	0.00198455	0.00217991	0.00301126	0.00205893	0.00293699	0.00438886	0.00202972	0.00294075	0.00381862	0.00239725	0.0030511	0.00353625	0.00328704	0.00501444	0.00355421	0.00424786	0.00525461	0.00585137	0.00217062	0.00396978	0.00312649	0.00190422	0.00426142	0.00568924	0.00211755	0.00427208	0.00445983	0.00174306	0.00345149	0.0079894	0.000358392	0.00429483	0.00156006	0.0038718
ACTCT	0.0042122	0.00272642	0.00355321	0.00223492	0.00399656	0.00634904	0.00493009	0.00287154	0.00313471	0.00402448	0.00485915	0.0118222	0.00209875	0.00371427	0.00313726	0.000971383	0.00296647	0.00387428	0.00303539	0.00376317	0.00450489	0.00194254	0.00337021	0.00404429	0.00244686	0.00339201	0.00411123	0.00382607	0.00521349	0.00347379	0.00501034	0.00512217	0.00473748	0.00241056	0.00534074	0.00324506	0.00231777	0.00553827	0.00691326	0.00393096	0.00510018	0.0059339	0.00438741	0.00788456	0.00874253	0.00166347	0.00362899	0.00345944	0.00394891
TCCAC	0.00334759	0.00232482	0.00265726	0.00214602	0.00233037	0.00452034	0.00288913	0.00246952	0.00170755	0.0026985	0.00291923	0.0020351	0.002003	0.0030899	0.00227214	0.000646937	0.00120955	0.00235671	0.00119596	0.00188812	0.00281465	0.00201273	0.00268088	0.00257811	0.00156504	0.00208312	0.00160018	0.0025014	0.00372254	0.00222133	0.00397554	0.00453977	0.00412229	0.00222562	0.00296916	0.00215051	0.0017096	0.00353769	0.00517824	0.0014921	0.00364518	0.0031618	0.00424576	0.00718434	0.00844245	0.000936267	0.00247764	0.00141028	0.00367932
TTCCA	0.00337545	0.00211302	0.0026192	0.0028377	0.00230874	0.0141436	0.00298667	0.00262546	0.00169685	0.00249297	0.0029395	0.00197748	0.00230347	0.00300736	0.00237907	0.000693288	0.00135616	0.00237675	0.00138479	0.00175784	0.00285003	0.001955	0.00251345	0.00243911	0.00117323	0.00210206	0.00157425	0.002204	0.00385549	0.00227455	0.00385708	0.00458097	0.004108	0.00162563	0.0027595	0.00210013	0.00125414	0.00367052	0.0145327	0.00145887	0.00390821	0.00346777	0.00420209	0.00727568	0.00843401	0.000283416	0.00269725	0.0013401	0.00375958
TTTCC	0.00355184	0.011782	0.0026665	0.00144049	0.0027919	0.00468211	0.00315	0.00248437	0.00194408	0.00196391	0.00242836	0.00196858	0.00154577	0.00329446	0.00208709	0.00105637	0.00193901	0.00171937	0.00185838	0.00323322	0.0030896	0.00225494	0.00192473	0.00284865	0.00172658	0.00278591	0.00262414	0.00237262	0.00387833	0.00218458	0.0040843	0.00496844	0.0050134	0.00182753	0.00306729	0.00243041	0.00157803	0.00384063	0.00556244	0.00185742	0.00366316	0.00365732	0.00057251	0.00194696	0.00666987	0.0151223	0.00229601	0.000995604	0.00339966
GAACT	0.00308011	0.00254094	0.00319658	0.00228886	0.00318618	0.00515832	0.00340569	0.00228275	0.00216577	0.00174051	0.00254877	0.00141345	0.0018971	0.00336844	0.00252541	0.00163445	0.00203662	0.00284907	0.00205872	0.0020379	0.00267022	0.00267449	0.00257515	0.00236421	0.00119704	0.00297567	0.0022211	0.00336289	0.00533887	0.00393947	0.00413996	0.00512402	0.00401942	0.000978471	0.00390005	0.00278181	0.00159837	0.00421708	0.00574029	0.00188453	0.00421826	0.00486304	0.000516727	0.002116	0.00702623	0.000373006	0.00254996	0.00075895	0.0036521
ACAGT	0.00451932	0.00263787	0.00336657	0.00264306	0.00275949	0.00608087	0.00498604	0.00244412	0.00250617	0.00236966	0.00395942	0.00207418	0.00243016	0.00374979	0.0028073	0.00112291	0.00275749	0.00395369	0.00251149	0.00257339	0.00311845	0.00168281	0.00396829	0.00289615	0.00202629	0.00323949	0.00413317	0.0111622	0.00453083	0.0026968	0.00457738	0.00557123	0.00511707	0.00247036	0.00460941	0.00237793	0.00170994	0.00511344	0.0068371	0.00290403	0.0054485	0.00491301	0.00130939	0.00290057	0.00677077	0.00356807	0.00181435	0.00204071	0.00360592
CACAG	0.00390045	0.0223282	0.00378447	0.0220462	0.00404882	0.00552013	0.00441699	0.00276019	0.00308429	0.00286987	0.00313999	0.00189511	0.00227965	0.00367598	0.00348768	0.00261984	0.00361477	0.00405377	0.00328182	0.00392173	0.00372955	0.00213684	0.00277101	0.003533	0.00352313	0.00354279	0.00265018	0.00364517	0.00479194	0.00348321	0.00570837	0.0052734	0.00416657	0.00237025	0.00465614	0.00275995	0.00307507	0.00466821	0.00626118	0.00384141	0.00494639	0.00424289	0.00103004	0.00211544	0.00667715	0.00834664	0.00240847	0.00125734	0.003381
GTCAC	0.00413069	0.00354102	0.00371509	0.00352232	0.00392855	0.00570611	0.00527482	0.00330297	0.00338714	0.00402507	0.00484736	0.00210206	0.00271217	0.0039592	0.00380557	0.00222433	0.00433726	0.00392885	0.00394012	0.00280526	0.00417134	0.00268342	0.00463843	0.00428475	0.00376198	0.00376731	0.00370446	0.0048517	0.00495882	0.00394036	0.00622401	0.00522289	0.00518536	0.00300003	0.00547556	0.00291593	0.00370121	0.00547771	0.0066789	0.00468638	0.0055976	0.00584981	0.00436273	0.00749143	0.00844995	0.00787247	0.00337611	0.0034912	0.00385996
ACCGT	0.00631827	0.0061424	0.00697973	0.00728573	0.00637645	0.00816122	0.00898828	0.00628537	0.00745794	0.00655971	0.00647699	0.00636133	0.00683999	0.00699843	0.00625695	0.00565561	0.00703712	0.00628121	0.00640437	0.0072359	0.00728259	0.00503757	0.00646161	0.00694524	0.00877043	0.00782715	0.00884145	0.00802077	0.00673981	0.00615608	0.00899128	0.00741147	0.00725601	0.00715024	0.00671612	0.00511231	0.00845907	0.00772703	0.00781404	0.00755974	0.00725933	0.00618508	0.0046411	0.00384726	0.00802079	0.00140758	0.00588174	0.0103206	0.00716527
AGATA	0.00252941	0.000860868	0.00271665	0.00215805	0.00234511	0.00486744	0.00358046	0.00150682	0.00209185	0.000932907	0.00198956	0.00138918	0.00198056	0.00239085	0.00175935	0.0116282	0.00224175	0.00118291	0.00142717	0.00166469	0.0016759	0.000964632	0.00185525	0.00136363	0.000931897	0.00279357	0.00315892	0.00180542	0.00426179	0.00224604	0.00369007	0.00368341	0.00291355	0.00111933	0.00316919	0.00226694	0.00107168	0.00404167	0.00552202	0.00161051	0.0040551	0.00436445	0.000377523	0.0022399	0.00657198	0.0062076	0.0026759	0.0016138	0.00276746
TCTGG	0.00424242	0.00242173	0.00332663	0.00161786	0.00304936	0.00544913	0.00362137	0.00285781	0.00201394	0.00251164	0.00375604	0.00169197	0.00159632	0.00353928	0.00325771	0.000951977	0.00227376	0.00401076	0.00182704	0.00236859	0.00294839	0.0018428	0.00272224	0.00235103	0.000975002	0.0024582	0.00262245	0.00191655	0.00433355	0.00260588	0.00392114	0.00524299	0.00430215	0.000730562	0.00499306	0.00256711	0.000916624	0.00440513	0.00641555	0.00187962	0.00481441	0.00454422	0.0048107	0.00722636	0.00855965	0.000566847	0.00310153	0.00222188	0.00386869
TTCTG	0.00564287	0.00514422	0.00635659	0.00586898	0.00725602	0.00751904	0.00664602	0.00501567	0.00611815	0.0047937	0.00549409	0.00337037	0.00447524	0.00541121	0.00639962	0.00532494	0.00736858	0.00584033	0.00597804	0.00628098	0.00568392	0.00433085	0.0047313	0.0052517	0.0064046	0.00628688	0.00503674	0.00598795	0.00842699	0.00707526	0.00825387	0.00681109	0.00486034	0.0041833	0.00822757	0.00566816	0.00496507	0.00738684	0.0077173	0.00635988	0.00840925	0.00778962	0.00309218	0.00301249	0.0073537	0.00953386	0.00378321	0.00292423	0.00381027
TTTCT	0.00574413	0.00562345	0.00676526	0.00642232	0.00685644	0.0070308	0.00595866	0.0063433	0.00604652	0.00574957	0.00600224	0.0049057	0.00580455	0.00690504	0.00593981	0.00639374	0.00610037	0.00577394	0.00580188	0.0066224	0.00565585	0.00492536	0.00579911	0.00520934	0.00454969	0.00591447	0.00527933	0.00455543	0.00705173	0.00704916	0.00672378	0.00679311	0.00615741	0.0037895	0.00735717	0.00424907	0.00453175	0.0070161	0.00746629	0.00492593	0.00742122	0.00604127	0.00457815	0.00372506	0.00795214	0.00120362	0.00502935	0.0133052	0.0103676
CCTTT	0.00432507	0.00447003	0.00732685	0.00661787	0.00538858	0.0054115	0.00459159	0.0165073	0.00703182	0.00639475	0.00513105	0.00379481	0.00643973	0.00599541	0.0056943	0.00602759	0.00414173	0.00464586	0.00611706	0.00390363	0.00428757	0.00707226	0.00830137	0.00399832	0.00394945	0.00458779	0.00314225	0.00477235	0.00677058	0.00699709	0.00550666	0.00530918	0.00511769	0.00395017	0.00594521	0.00378412	0.00602426	0.01532	0.00590911	0.00388275	0.00687967	0.00521695	0.00772587	0.00947716	0.00825375	0.00888589	0.00504541	0.00175142	0.00402388
CCCTT	0.00396509	0.0028	0.00339795	0.00295615	0.00290133	0.0047043	0.00320078	0.00297169	0.00337827	0.00278436	0.0025884	0.00241413	0.00319725	0.00340809	0.00246663	0.00338168	0.00240119	0.00236043	0.00277375	0.00235435	0.00242032	0.00265853	0.00302498	0.00206647	0.00182768	0.00247959	0.00245312	0.00290723	0.00426791	0.00236167	0.00415495	0.00454556	0.00421088	0.00223646	0.0036522	0.00208773	0.00188497	0.00435671	0.00539753	0.0023705	0.00546957	0.00428692	0.00228593	0.00248368	0.00672037	0.00124204	0.00285684	0.00111047	0.00362659
GTCCC	0.0053888	0.00511254	0.00345412	0.00273434	0.0042613	0.00543127	0.00362301	0.00379763	0.00402493	0.00236312	0.00414742	0.00538413	0.00312784	0.00391246	0.00405219	0.00446216	0.00322046	0.00379018	0.00366136	0.00367449	0.00365366	0.00513515	0.00371497	0.00318389	0.00308383	0.00407871	0.00379364	0.00276263	0.00451829	0.00339309	0.00499276	0.00717773	0.00615729	0.00179876	0.00471322	0.00723473	0.0029673	0.00522354	0.00675056	0.00279851	0.00601738	0.00469366	0.00231635	0.00262949	0.00660371	0.000272018	0.00711515	0.0025296	0.0080217
TGTCC	0.00161589	0.00307546	0.00465847	0.00418503	0.00368684	0.00178432	0.00316797	0.00341304	0.00572245	0.00318859	0.00239533	0.0024601	0.00413235	0.00205875	0.00386449	0.00436356	0.00393046	0.00215812	0.00437567	0.00261769	0.00226105	0.00528042	0.00486231	0.00230968	0.00459157	0.00367096	0.00307533	0.00311538	0.00339442	0.00424247	0.00284701	0.00179704	0.00111321	0.00358383	0.00393913	0.00415223	0.00446333	0.00304888	0.00149366	0.00379589	0.00281969	0.00208446	0.00425906	0.00161506	0.00018859	0.00131982	0.00166504	0.000927018	0.00240276
TTGTC	0.000899598	0.00225777	0.00409442	0.00437263	0.002797	0.00155429	0.00293493	0.00379723	0.00522662	0.00382739	0.00200623	0.00141207	0.00342411	0.00295726	0.00301905	0.00330572	0.0030742	0.00205417	0.00432476	0.00211379	0.00196003	0.00485648	0.00493444	0.00230866	0.00419774	0.00295267	0.00187579	0.00333593	0.00253252	0.00341744	0.00282503	0.000863156	0.000512376	0.00346559	0.00233175	0.00164165	0.00428966	0.00272098	0.000627322	0.00357951	0.00160274	0.00122875	0.00456916	0.00136774	0.000231044	0.00165096	0.000509693	0.000788484	0.000307455
CCCCC	0.0019541	0.0028093	0.00240083	0.00237899	0.00198063	0.00202664	0.00189638	0.00252173	0.00249782	0.00174627	0.00170013	0.00170644	0.00159461	0.00280961	0.0022538	0.0012274	0.00179002	0.0029483	0.00196584	0.00143462	0.00224468	0.00276636	0.00321581	0.00231081	0.00396407	0.00293211	0.00235088	0.00308212	0.00270789	0.00362148	0.0033101	0.00278537	0.00266724	0.00293226	0.00192875	0.0020649	0.00439286	0.00154704	0.00135581	0.00280697	0.00152214	0.00294981	0.000419644	0.000586462	0.00116996	0.00765589	0.00168717	0.000713443	0.00141253
GCCCC	0.00200335	0.00252149	0.00145533	0.00229785	0.00150718	0.00160912	0.00190004	0.00198696	0.00145576	0.00187094	0.0015062	0.00152338	0.00185847	0.00189174	0.00148656	0.00161768	0.00173231	0.00133677	0.00129006	0.00202272	0.00174499	0.00182569	0.000951007	0.00174077	0.00253315	0.00289124	0.00293315	0.00182809	0.00170547	0.00132207	0.00215922	0.00258226	0.00279621	0.00196116	0.000818535	0.0017313	0.00264583	0.00138423	0.000729834	0.00164396	0.0010393	0.00109921	0.000465463	0.000947574	0.000332876	4.88132e-05	0.00206348	0.000463321	0.000815609
TGCCC	0.00158337	0.00166922	0.00143927	0.00131603	0.00117783	0.00105492	0.00106607	0.00154501	0.00107113	0.00205771	0.00187206	0.000564419	0.000711817	0.00153158	0.00144184	0.000537146	0.000786551	0.00191676	0.0011352	0.00103009	0.00123927	0.00197903	0.00154854	0.00122212	0.00189443	0.00162023	0.00106523	0.00180403	0.00161726	0.0015356	0.00183268	0.00199785	0.00142711	0.00160567	0.000689252	0.00147452	0.00178912	0.00135131	0.000554141	0.00160286	0.000730992	0.000989024	0.00563027	0.00607591	0.0021342	0.000287437	0.00186006	0.000939503	0.00126013
CAGGG	0.00281731	0.00470887	0.00735745	0.005795	0.00395025	0.00349198	0.00608315	0.00514447	0.00714314	0.00491873	0.00363886	0.00325923	0.0055625	0.00561601	0.00499158	0.00497651	0.00399227	0.00446422	0.00501341	0.00341316	0.00446449	0.00656967	0.00751492	0.00444594	0.00553218	0.00591788	0.00672144	0.00399021	0.00465828	0.00531813	0.00421397	0.00388141	0.0047256	0.00455692	0.00318886	0.00329969	0.00556991	0.00423982	0.00174872	0.00394891	0.00294664	0.00332786	0.00754348	0.0078602	0.00362269	0.00809385	0.00326973	0.00713604	0.00497201
GATCA	0.00062228	0.00150883	0.00258008	0.00288651	0.00219183	0.00112987	0.00205492	0.0023617	0.00351643	0.00259617	0.00133133	0.000986156	0.0022092	0.00176298	0.00194813	0.00220849	0.00246141	0.00143638	0.00299901	0.00202419	0.00171864	0.00257897	0.00287525	0.0019109	0.00379831	0.00217276	0.00132405	0.00293121	0.00160623	0.00210289	0.00264551	0.000512107	0.000667956	0.00280216	0.00157071	0.00113444	0.00369152	0.00186871	0.00046477	0.00310356	0.00101414	0.000790474	0.0031896	0.000732684	0.000107787	0.00162819	0.000209853	0.000641991	0.000112494
CTGGA	0.000766485	0.00139217	0.00250848	0.00286512	0.00240282	0.00125769	0.00214123	0.00255586	0.00350417	0.00260374	0.00138993	0.000787209	0.00226667	0.00176243	0.00214496	0.00222905	0.00251324	0.00148975	0.00292295	0.00189025	0.00207741	0.00264312	0.00287973	0.00215227	0.00426463	0.00226457	0.00139282	0.00306503	0.00157684	0.00216679	0.00305815	0.000649061	0.000339002	0.00286387	0.00163916	0.00139292	0.00412615	0.0019213	0.000453245	0.00332568	0.00106231	0.000829815	0.0032826	0.000788276	0.000103481	0.00145382	0.000556501	0.000694685	0.000131002
AATTG	0.000798133	0.00106026	0.00158878	0.00177273	0.00215187	0.000806311	0.00146008	0.00150548	0.0116017	0.00244618	0.00155226	0.000599314	0.00125085	0.00109156	0.0020501	0.00198955	0.00205925	0.00198479	0.00213683	0.00208834	0.00174238	0.00114768	0.00199777	0.00190055	0.00281881	0.00189492	0.00137631	0.00171294	0.00110512	0.00255938	0.00194428	0.000355929	0.000252556	0.00134007	0.00122845	0.00127949	0.00194659	0.00118097	0.000460999	0.00200673	0.00130049	0.00137912	0.00415182	0.00576764	0.00231305	0.000223285	0.000955872	0.00620048	0.00438193
ACACA	0.000770761	0.00123397	0.0020082	0.0019458	0.00274758	0.00149336	0.00187668	0.00119799	0.00222658	0.00153616	0.00126766	0.000574325	0.00101167	0.00100036	0.00250746	0.0013821	0.00226539	0.00361541	0.00194986	0.00328638	0.00134919	0.000731473	0.00101331	0.00141605	0.00328064	0.00155719	0.000712781	0.00210656	0.0010473	0.0012368	0.00241097	0.00132439	0.00028638	0.00176672	0.00239389	0.00125447	0.0023483	0.00156477	0.00201343	0.00283011	0.00211178	0.00153626	0.00255624	0.000361282	0.000542813	0.00884404	7.73205e-05	0.000724572	0.000377713
TCGTG	0.000419524	0.000951562	0.000862596	0.00193162	0.0013111	0.000635756	0.00156128	0.00103948	0.00127191	0.00143218	0.000874782	0.000464233	0.001101	0.00047741	0.00130683	0.00121966	0.00185725	0.000524407	0.00142718	0.000900424	0.00126051	0.000591953	0.000763944	0.00140918	0.00220026	0.00124676	0.000850367	0.00119011	0.00063122	0.000691543	0.00160674	0.00023642	0.000156729	0.00161989	0.000886477	0.000939875	0.0016742	0.00102653	0.000330519	0.00181319	0.000561818	0.000618801	0.00169897	3.50103e-05	5.17172e-05	0.00018149	5.01359e-05	0.000596986	7.28483e-05
TTCGT	0.00395622	0.00432851	0.00243662	0.00337485	0.00436588	0.00242682	0.00274403	0.00379715	0.00270896	0.00368643	0.00482053	0.00501539	0.00306284	0.00348292	0.00404039	0.00435996	0.00364106	0.00579263	0.00353127	0.00522806	0.00384194	0.00353751	0.00274181	0.00398409	0.00510946	0.00331582	0.00307953	0.00319097	0.000984794	0.0026966	0.00364742	0.0034645	0.00410575	0.00361808	0.00393992	0.00469238	0.00432837	0.00268761	0.00490859	0.00425342	0.00467385	0.00331539	0.00800237	0.00651883	0.00191004	0.000727624	0.00668421	0.00287509	0.00319218
GTCTT	0.000800345	0.00129147	0.0012408	0.00204577	0.00183603	0.0012036	0.00293756	0.00145093	0.00182564	0.00165588	0.00156354	0.00161158	0.00201228	0.000531241	0.00158651	0.00180427	0.00162074	0.0011244	0.00168262	0.00240466	0.00205703	0.000485514	0.00153531	0.00178543	0.00296011	0.00153452	0.0034613	0.00281509	0.000816053	0.00128823	0.00172437	0.0011391	0.00125906	0.00315241	0.00122033	0.00160189	0.00251483	0.00133153	0.000843618	0.00278833	0.00140898	0.000909068	0.00196445	0.00124606	0.000165781	0.000959569	0.00184044	0.00079418	0.000999829
CGTCT	0.00108022	0.000615761	0.00085417	0.000929805	0.00100744	0.000839519	0.00165364	0.00108667	0.000950484	0.000921267	0.000765557	0.00113911	0.00116726	0.000720014	0.00157145	0.000914978	0.00113048	0.020884	0.000901001	0.000862941	0.00143275	0.000574663	0.000496778	0.000956247	0.00108041	0.000814344	0.00115339	0.000816569	0.000501469	0.000652754	0.000521852	0.00137339	0.000872599	0.000858497	0.000769156	0.00117078	0.000683562	0.000585654	0.00095843	0.00129792	0.00108614	0.000491351	0.000830288	0.000214231	0.000123409	7.55068e-05	0.000447651	0.000471127	0.000747214
CAATC	0.00383737	0.00311397	0.00270591	0.00277163	0.00305555	0.00225676	0.00274941	0.00252933	0.00206926	0.00283266	0.0036809	0.00261125	0.0211525	0.0028485	0.00258582	0.00295997	0.00309143	0.00375772	0.00229387	0.00432216	0.00393845	0.00242833	0.00214952	0.00416438	0.00262576	0.00252177	0.00309759	0.00272673	0.00187309	0.00169095	0.00294563	0.0031419	0.00445756	0.00250647	0.00263733	0.00254031	0.00193394	0.00248919	0.00229889	0.00249923	0.00239556	0.00217046	0.00382814	0.00130675	0.00166918	0.00128088	0.00480004	0.000834664	0.000468558
CACTT	0.00183485	0.00272021	0.00298319	0.00284051	0.0038245	0.00163824	0.00266449	0.00256942	0.00331914	0.00455828	0.00274033	0.00160542	0.00228569	0.00216561	0.00288691	0.00397395	0.00444787	0.0026995	0.0035873	0.00312326	0.00372531	0.00196007	0.00251803	0.00379303	0.00610122	0.00283632	0.0021613	0.00343996	0.00203675	0.0020717	0.00440567	0.00122826	0.000801203	0.00490141	0.0026876	0.0024111	0.00416534	0.00209006	0.000892706	0.00505728	0.00190064	0.00114957	0.00575788	0.0062225	0.00219259	0.00884483	0.00140246	0.00300549	0.000963509
GCACT	0.000958239	0.00114583	0.000987083	0.00129844	0.00158372	0.00088744	0.00140752	0.00139777	0.00158805	0.00174096	0.00109422	0.000980501	0.00119853	0.00104292	0.00126903	0.00230302	0.00213893	0.00123331	0.00171219	0.00152778	0.00191134	0.000870001	0.000793787	0.00188502	0.00264626	0.00146824	0.0011149	0.00138998	0.00120361	0.00100032	0.00189935	0.000714327	0.00025098	0.00168986	0.00113645	0.00132787	0.0019372	0.00111289	0.000313383	0.00181065	0.000714701	0.000523317	0.00197208	0.000362693	0.00035929	0.00861728	0.000599569	0.00152622	0.000218766
AGCAC	0.0016357	0.00240179	0.0035761	0.00407015	0.00302498	0.0021401	0.00279871	0.00330342	0.00496904	0.00317129	0.00216574	0.00247787	0.00377453	0.00281183	0.0031147	0.00261738	0.00331599	0.0029374	0.00404538	0.001122	0.00232832	0.00425726	0.00387941	0.00263365	0.00507825	0.00333304	0.00194988	0.00484244	0.00434039	0.00478541	0.00314652	0.00148164	0.000383929	0.00390037	0.00284902	0.00323038	0.00488438	0.00326414	0.00106341	0.004069	0.00210736	0.0030937	0.0049182	0.000996106	0.00127812	0.0177767	0.00109291	0.00322891	0.000946468
GCTGA	0.000801725	0.000714303	0.000620577	0.00136338	0.000692051	0.000916703	0.00081666	0.00169497	0.000939427	0.00128552	0.000593636	0.000715446	0.00104425	0.00082414	0.00056771	0.00136624	0.000754014	0.000295375	0.00148836	0.00103301	0.00202209	0.000624786	0.000336883	0.00227405	0.00185858	0.00120929	0.00149741	0.00115756	0.000354604	0.000476497	0.00136194	0.000638022	0.00118714	0.00128241	0.000506459	0.000928216	0.0019016	0.000874828	0.000264443	0.00106536	0.000424987	0.000395639	0.00119736	0.000726187	5.79692e-05	0.0111726	0.000361634	0.000457974	9.01626e-05
CAGGT	0.00308131	0.0034549	0.00259503	0.0217456	0.00225389	0.00167176	0.00224071	0.00371702	0.00301691	0.00277935	0.00226115	0.00319545	0.00283305	0.0031642	0.00237548	0.00395615	0.00214282	0.00226508	0.00297754	0.00266125	0.00374977	0.00438205	0.00285038	0.00385825	0.00253688	0.00273964	0.00276977	0.00139349	0.00161458	0.0018929	0.00205581	0.00271709	0.00355994	0.0027772	0.00186509	0.00417483	0.002723	0.00206334	0.00155093	0.00221595	0.00142654	0.00118106	0.00374168	0.00186996	0.00147368	0.00100119	0.00370169	0.00716256	0.00627979
TCTGC	0.000665535	0.000356423	0.000562336	0.000395317	0.000279512	0.0004367	0.000858699	0.000335239	0.000640463	0.00043543	0.000393225	0.000480573	0.000587696	0.000970891	0.00047914	0.000239766	0.000426664	0.00040888	0.00037448	0.000537206	0.00106505	0.000315565	0.000182252	0.000836933	0.00184548	0.000926948	0.00093576	0.00149551	0.00034635	0.000240307	0.00130687	0.000384957	0.000741388	0.00120543	0.000640387	0.000614128	0.00160872	0.000476715	0.000237304	0.00110116	0.000485672	0.00025112	0.00139709	0.000469245	0.00122629	0.0145516	0.000618635	0.00581537	0.00341212
TTTAG	0.000821013	0.00159155	0.00228593	0.00313667	0.00306894	0.00121791	0.00173979	0.00197577	0.0028907	0.00183162	0.00174478	0.00113621	0.00178365	0.000995751	0.00254169	0.00206217	0.00297349	0.000998865	0.00259355	0.00286311	0.00201507	0.00189802	0.00178373	0.0019605	0.00300627	0.00267141	0.00122508	0.00216462	0.00280216	0.00297825	0.00248129	0.00111636	0.000185282	0.00193098	0.0027474	0.00251726	0.00238936	0.00212287	0.000747212	0.00220367	0.00236222	0.00207098	0.000385314	0.00093444	0.000227687	4.73791e-05	0.000572942	0.00067074	8.80021e-05
ATTTA	0.000734711	0.00160462	0.00271779	0.00261786	0.00258482	0.00119927	0.00164485	0.0018029	0.00286539	0.0126772	0.00194801	0.000943474	0.00187512	0.00133975	0.00226306	0.00197974	0.00311716	0.00199046	0.00265543	0.00204593	0.00207412	0.0119585	0.0119269	0.00226809	0.00262687	0.00255132	0.0013432	0.00202394	0.00196837	0.00218999	0.00245858	0.00105954	0.000191741	0.00179984	0.00157301	0.00193896	0.00186719	0.00234599	0.000838698	0.00226993	0.00162075	0.00186929	0.00399921	0.00589169	0.00250207	2.19418e-05	0.000591465	0.00121768	0.000928564
GTATT	0.000902247	0.0122053	0.00309958	0.00210922	0.00277865	0.00102543	0.00210365	0.00242518	0.0037103	0.0139304	0.00230224	0.00161042	0.00230586	0.00261346	0.00273819	0.00253187	0.00298245	0.00296736	0.00238478	0.00279964	0.00282064	0.00322732	0.0135406	0.00309356	0.0133074	0.00286365	0.00204181	0.0022391	0.00208451	0.00268914	0.00253509	0.000750264	0.00106409	0.00281384	0.0021435	0.00174306	0.00328683	0.00188635	0.000881833	0.00276394	0.00977993	0.00190638	0.00695684	0.00574079	0.00276946	0.00276226	0.000376951	0.00157333	0.00115156
CGTAT	0.00263474	0.0137154	0.0116074	0.00336184	0.022363	0.00226122	0.00429641	0.00271888	0.0127844	0.0134162	0.00376152	0.00320835	0.00251732	0.00155417	0.00300573	0.0133011	0.00404281	0.00239763	0.00307395	0.00419964	0.00436669	0.00284502	0.0132127	0.00442199	0.012646	0.00344892	0.00494129	0.00236839	0.00169906	0.0018497	0.00232292	0.00260855	0.00296404	0.00292184	0.00294743	0.00539954	0.00200594	0.00275906	0.0022882	0.00244462	0.0111739	0.00173213	0.00106132	0.00100641	0.000224333	2.16648e-05	0.00359037	0.00132427	0.00255616
CAGAC	0.00438495	0.00420402	0.00690882	0.00549149	0.00620954	0.00610891	0.00525631	0.00579036	0.00757592	0.00666141	0.0059368	0.00345777	0.00461707	0.00568248	0.00567682	0.0066894	0.00593522	0.0242799	0.00635487	0.00438141	0.00417479	0.0061905	0.00601004	0.00452068	0.00291777	0.00528664	0.00373781	0.00384152	0.00699683	0.00679601	0.00488433	0.00527012	0.00426188	0.00362641	0.00648197	0.00617921	0.00391861	0.00697333	0.00726721	0.0045434	0.00712523	0.00631418	0.00699038	0.00919588	0.00853626	0.000816672	0.00470815	0.00282584	0.00533566
GTCAG	0.00494228	0.00422884	0.00555348	0.00448406	0.00478552	0.00680489	0.00499218	0.00494329	0.00450809	0.00410973	0.00469516	0.00388117	0.00392402	0.00624381	0.00466745	0.00346328	0.00370499	0.00597313	0.00414285	0.00392163	0.00401782	0.00538771	0.00484929	0.0040738	0.00302728	0.00528038	0.00451225	0.00449007	0.00700461	0.00570084	0.00595068	0.00702803	0.00622076	0.00293924	0.00531419	0.00396722	0.00395574	0.00645366	0.00727297	0.00427821	0.00599759	0.00622316	0.00329029	0.00293859	0.00742438	0.00940303	0.00507352	0.00210031	0.00414397
AGCTA	0.00100199	0.00165775	0.000299942	0.000245243	0.000790929	0.000663722	0.000589931	0.00127566	0.000499564	0.00135274	0.000905533	0.000451447	0.000717206	0.0011553	0.000316587	0.00139166	0.000553292	0.00109376	0.000648682	0.0010739	0.00139334	0.000813404	0.000219652	0.00114617	0.000905851	0.000628996	0.000868773	0.000826253	0.000240321	0.000322253	0.000576176	0.000967359	0.001048	0.000916456	0.000417383	0.0194585	0.000731229	0.000494812	0.000323828	0.000660218	0.000238602	0.000460219	5.96596e-05	9.41777e-05	0.000264274	0.0116852	0.000280105	0.000286175	0.000466931
TAAGC	0.000967002	0.00255864	0.00215437	0.0029787	0.00126168	0.00140893	0.00275673	0.00273507	0.0028885	0.00315109	0.0023694	0.0019042	0.00283447	0.002017	0.00177787	0.00125879	0.00151353	0.00220123	0.00251327	0.00164069	0.00162314	0.00268071	0.00336155	0.00184622	0.00314394	0.00191498	0.00274073	0.00364576	0.0016012	0.00201641	0.00154564	0.00131228	0.0015664	0.0044737	0.00154095	0.00103024	0.0033291	0.00189482	0.000846951	0.00327311	0.00122647	0.00101591	0.00312247	0.00105687	0.00035725	0.00178345	0.000879053	0.000890548	0.000284316
CAAGA	0.00184188	0.00258854	0.000724599	0.00301871	0.00134867	0.00123101	0.00257071	0.00214932	0.00144052	0.00153373	0.00230597	0.0215894	0.00192958	0.00151612	0.00139901	0.00174423	0.00122057	0.00200838	0.00169822	0.00201865	0.00136124	0.001192	0.00139575	0.00128763	0.00142685	0.00190826	0.00271617	0.0016937	0.00139453	0.00296722	0.00149268	0.00192537	0.00276919	0.00128381	0.00116762	0.00140152	0.00121352	0.00129005	0.000577495	0.00171093	0.00145467	0.00124089	0.000513598	0.00143296	0.000253703	0.00023013	0.00277019	0.000469146	0.000406518
GCAAG	0.00207851	0.0020618	0.00331181	0.00231827	0.00185884	0.0016479	0.00211358	0.00273644	0.00289479	0.00328938	0.00262279	0.00227399	0.0025026	0.00255873	0.00234264	0.00258406	0.00197461	0.00269262	0.00343482	0.00198935	0.00216728	0.00295214	0.00350123	0.00231935	0.0031641	0.00301597	0.0029084	0.00243691	0.00218594	0.00326432	0.00223119	0.00154752	0.00211545	0.00255045	0.00164025	0.00133588	0.00311994	0.00211763	0.00142355	0.0024281	0.0018434	0.00199442	0.00866405	0.00732067	0.00323481	0.00192223	0.00314475	0.0072348	0.00435258
CGCAC	0.000413226	0.00117681	0.000465874	9.85738e-05	0.000603768	0.000254957	0.000148318	0.00109324	0.000216493	0.00113877	0.000816714	0.000931933	0.000830196	0.000919916	0.000694915	0.00133153	0.000771493	0.00051979	0.000259938	0.00122916	0.00113003	0.000559823	9.8185e-05	0.00109243	0.000569327	0.00012382	0.000144879	0.000393726	0.000126758	8.38618e-05	0.000169387	0.000759639	0.000519377	0.00116379	0.000114135	0.000845403	0.00132138	0.00010578	0.000214524	0.000522124	0.000140698	0.000141781	0.000320884	0.000111912	8.15043e-05	0.000111628	0.00041975	0.00016685	0.000212418
CCCGC	0.000413932	0.000339894	0.000278267	0.000416485	0.000336212	0.000216765	0.000168651	0.000453206	0.0006745	0.00063633	0.000245053	0.00032625	0.00138617	0.000556079	0.000144142	0.00136134	0.000563128	0.000646667	0.000555085	0.000351543	0.000422546	4.46439e-05	0.000421427	0.000257112	0.00140686	0.000309613	0.00030715	0.00105046	0.000161464	0.000211515	0.000500427	0.000260721	0.000311507	0.00149409	0.000387156	0.000153185	0.0016588	0.000162625	0.000226587	0.00139306	0.000183697	0.00037255	0.000128242	0.000335849	0.000161724	0.00192736	0.000510514	0.000309156	0.000290738
AGCGG	0.000582464	0.00015753	0.000198104	0.000157848	0.000381753	0.000118392	0.000131176	0.000324769	0.000180798	0.000206732	0.000240476	0.000309518	0.000615606	0.000237473	0.000116537	0.00120669	0.000261187	8.43234e-05	0.000259822	0.000223054	0.000394423	7.62159e-05	0.000178	0.000152094	0.000200235	0.000161965	6.56535e-05	0.000266792	5.81934e-05	9.01532e-05	8.30119e-05	0.000152933	0.000289137	0.0002406	0.000120822	0.000617564	0.000341751	1.6376e-05	0.000144964	0.000245073	0.000176064	6.37402e-05	9.36419e-05	7.4958e-05	8.41376e-05	0.000928371	0.000338858	0.000217415	0.000113179
TCGTC	0.0015501	0.00215354	0.00163126	0.00172586	0.00317251	0.00101119	0.00115704	0.00242839	0.00176399	0.00289849	0.00306359	0.00292849	0.00175527	0.00273883	0.00288127	0.00282857	0.00178363	0.00333082	0.00227244	0.00332202	0.00229834	0.00154314	0.00237044	0.00244942	0.00278314	0.00210873	0.00148106	0.00207651	0.000869574	0.00322175	0.00249474	0.00143049	0.00248193	0.00186962	0.00213882	0.00154981	0.00264873	0.00119293	0.00273468	0.0025319	0.00314512	0.00214594	0.00505306	0.00636229	0.00184994	0.000215233	0.00420421	0.00240455	0.000828319
CCTCG	0.000611819	0.00089001	0.00182957	0.00140258	0.00118143	0.000815603	0.000523914	0.00142172	0.000901691	0.00253313	0.00194323	0.000653733	0.000612679	0.00117434	0.00210839	0.00041436	0.000598295	0.00203471	0.00105116	0.00075265	0.000978414	0.00221611	0.00234841	0.0017005	0.00139518	0.00100134	0.000356652	0.00166877	0.0015454	0.00235947	0.00114148	0.00129701	0.000410541	0.00152274	0.00062739	0.000762266	0.00118535	0.000947146	0.000581525	0.00111708	0.000763208	0.00139814	0.00759654	0.0107971	0.00362576	0.00811144	0.00118677	0.00112589	0.000847131
CGCCT	0.000766887	0.000215816	0.000577421	0.000241039	0.000734025	0.000235731	0.00026801	0.000906416	0.000190808	0.00117932	0.000877831	0.000328106	8.8684e-05	0.000383518	0.00102044	8.10848e-05	6.52028e-05	0.00102839	0.000262877	0.000561562	0.000583968	0.000444355	0.000832256	0.000546085	0.000302561	0.000321785	0.000472279	0.000213789	0.000121775	0.000474311	0.0001455	0.000325523	0.000406745	0.000349912	0.000183394	0.000513856	0.000513883	0.000135689	0.000160301	0.000374522	0.000110683	0.000129849	0.00372946	0.00568418	0.0019789	0.000781508	0.00102965	0.00148381	0.000655417
GGGCT	0.000695555	0.00105283	0.000697754	0.000469184	0.000799299	0.000767788	0.000957528	0.000721949	0.000652028	0.00114714	0.000413007	0.00126578	0.00117748	0.000706296	0.00062978	0.00129804	0.00114505	0.000284738	0.000927174	0.0016032	0.000804731	0.000299461	0.000575871	0.00103487	0.00110117	0.00160821	0.00216851	0.00036594	0.000241569	0.000239408	0.000926963	0.000815538	0.00134819	0.00101923	0.00033832	0.000309446	0.00160501	0.00031308	0.000412394	0.000653773	0.000400862	0.000396443	0.000247192	0.000699302	8.96338e-05	0.000268761	0.000590867	0.000383087	0.000101082
CGGGG	0.000814399	0.00136765	0.00132259	0.00087964	0.000932976	0.000714102	0.000942916	0.00117115	0.00125512	0.00243916	0.00110339	0.00133072	0.00152541	0.00106471	0.00112861	0.00149051	0.00138542	0.00106946	0.000963986	0.00192359	0.00127955	0.000930693	0.0017255	0.00171416	0.00142777	0.00156851	0.00220847	0.000476461	0.00024054	0.000545827	0.000863856	0.000808663	0.00141784	0.00159815	0.000439114	0.000481356	0.00215142	0.000455665	0.000521779	0.00149014	0.000437342	0.000689866	0.00382661	0.00543868	0.00189	0.000914061	0.000901832	0.000930411	0.000595331
CCGGG	0.00123689	0.0013047	0.00208375	0.00152838	0.0014648	0.000827077	0.000935466	0.00155947	0.00140075	0.00310103	0.00177839	0.00177088	0.00163003	0.00112377	0.00197378	0.00177059	0.00147893	0.00140037	0.00141881	0.002112	0.00122598	0.00124925	0.00250536	0.00183161	0.00117786	0.00190996	0.00210072	0.000379297	0.0012459	0.00177682	0.000616702	0.000812397	0.00142137	0.00110317	0.000506119	0.000816411	0.00176541	0.000589415	0.000527898	0.00105172	0.00139334	0.00115715	0.00760659	0.0116901	0.00356233	9.27199e-05	0.00135697	0.00125621	0.000689071
GCGGA	0.00136711	0.00140877	0.00117931	0.000814443	0.00154997	0.00147514	0.00107232	0.00115738	0.000760167	0.00111394	0.00170571	0.00220863	0.00162174	0.00158042	0.00152113	0.00159753	0.00169705	0.00284112	0.00147647	0.00209925	0.000846425	0.000607549	0.000646287	0.000980342	0.00170692	0.00130586	0.00168875	0.000619365	0.00100071	0.00129169	0.00141307	0.00133929	0.0014143	0.00193209	0.00155372	0.00210717	0.00133401	0.00136903	0.00176821	0.00216839	0.0015393	0.00169779	0.00122681	0.000555397	0.000291255	0.000447518	0.00241596	0.00258949	0.00042069
TTGCG	0.00348025	0.00379224	0.00550409	0.00507605	0.00469119	0.00402619	0.00341495	0.0047779	0.00419941	0.00459302	0.00509867	0.00429945	0.00457711	0.00496022	0.00512001	0.00462824	0.0043871	0.00633475	0.00561519	0.00401058	0.00334861	0.00586911	0.0050904	0.00406134	0.00485805	0.00593053	0.0049719	0.00623748	0.00583314	0.00699708	0.00469258	0.00429989	0.0036819	0.00424294	0.00391857	0.00383146	0.0051825	0.00480943	0.00371484	0.00570185	0.00427172	0.00593446	0.00835469	0.00757469	0.00441223	0.0023173	0.00553134	0.00839171	0.00534201
TGCGT	0.00073979	0.000852652	0.00151511	0.0011388	0.00134601	0.00175953	0.00119309	0.00126457	0.00138341	0.000911309	0.00189032	0.000526569	0.0013995	0.000995996	0.00142734	0.000708781	0.00171515	0.0014758	0.00160792	0.00049471	0.000734844	0.00157947	0.000661623	0.000875344	0.000782375	0.00129702	0.00118944	0.00172806	0.00280651	0.00233841	0.00111943	0.00123711	0.000319849	0.00131349	0.00175937	0.00212151	0.00109013	0.00210153	0.00187664	0.00226547	0.0018629	0.00347337	0.000437687	0.000899402	0.000695151	0.000450704	0.000738435	0.00102998	0.000634717
CTCCG	0.00169721	0.00268411	0.00296821	0.00407987	0.00303046	0.00286548	0.00304787	0.00265852	0.00269085	0.00239962	0.00324756	0.00297348	0.00303719	0.00247891	0.00347566	0.00253141	0.00323904	0.00431343	0.00314085	0.00295497	0.00229094	0.00222994	0.00302787	0.00261911	0.00414231	0.00328935	0.00446234	0.00525214	0.00438488	0.0052043	0.00312759	0.0026927	0.00196281	0.00438849	0.00336518	0.00331186	0.00386847	0.00365974	0.00297585	0.00471065	0.0043782	0.00455524	0.00145437	0.00160786	0.000958571	0.00934388	0.00357214	0.00202761	0.00084096
GCTCC	0.00163051	0.00167434	0.00150949	0.00215054	0.00174738	0.00206684	0.00194516	0.00186298	0.00118573	0.0014066	0.00236147	0.00351359	0.00254923	0.00163015	0.0017724	0.00167859	0.0022068	0.00292814	0.00156768	0.00226202	0.00158892	0.000777197	0.00119984	0.00154324	0.00273739	0.00182517	0.00304699	0.00166127	0.00123538	0.00180001	0.00210072	0.00174391	0.00168371	0.00308346	0.00173921	0.00145337	0.00203513	0.00198487	0.00191157	0.0023515	0.00220669	0.00191944	0.00133573	0.00134697	0.00029689	0.000419251	0.00280076	0.00147043	0.000379607
GAGTT	0.000861202	0.00165044	0.00191859	0.0026836	0.00224949	0.00229724	0.0029077	0.00170406	0.00219063	0.00171736	0.00237699	0.00206897	0.00224816	0.00131496	0.0020111	0.000752662	0.001887	0.00197599	0.00241463	0.00204844	0.00172553	0.00167735	0.00207434	0.00200043	0.00415122	0.00238425	0.0032989	0.00514589	0.00294112	0.00313702	0.00249946	0.00135396	0.000850609	0.0038775	0.00288678	0.00252547	0.00397873	0.00261812	0.00191213	0.00389419	0.00226175	0.00328548	0.000252279	0.000880239	0.000844479	0.00955365	0.00149203	0.00186967	0.000633406
AACAA	0.00316052	0.00208493	0.00230502	0.00256954	0.00219117	0.00209029	0.00282115	0.00229406	0.00208816	0.00323194	0.00330668	0.00205501	0.0020854	0.00183558	0.0022609	0.00194295	0.00253125	0.00395168	0.00202046	0.00315106	0.00199347	0.00134279	0.00262944	0.00232229	0.0019442	0.00167634	0.00354099	0.00252473	0.0017515	0.00166604	0.00128811	0.00192356	0.00230143	0.00219214	0.00201417	0.00172974	0.00176977	0.00230439	0.00226669	0.00230002	0.00251686	0.00219602	0.00477354	0.00657262	0.00234853	0.00215826	0.00338345	0.0026813	0.000890956
TAACA	0.00207955	0.0016844	0.00247286	0.00212897	0.00204496	0.00254705	0.00287193	0.00213869	0.00223402	0.00209463	0.00369618	0.00203345	0.00221516	0.00262587	0.00240158	0.00200199	0.0028583	0.004513	0.00246781	0.00224873	0.00132207	0.00129488	0.00265288	0.00153901	0.00209983	0.0025261	0.00417462	0.0025074	0.00239606	0.00303019	0.00220741	0.00221471	0.00240173	0.00134713	0.00309913	0.0016415	0.00165035	0.00302878	0.0029704	0.00287176	0.0032869	0.00369262	0.00624405	0.00678311	0.00371178	0.000757269	0.00367205	0.00804545	0.00444184
CTCTA	0.00179375	0.00107847	0.00134725	0.00120685	0.00124094	0.00199747	0.00182889	0.00109018	0.0012355	0.000847688	0.0019522	0.0012548	0.0013405	0.00135399	0.00161185	0.000857765	0.00206355	0.00237665	0.0014637	0.0014313	0.0110659	0.000337091	0.000666757	0.00143146	0.00105445	0.00179205	0.00351251	0.000448727	0.00157692	0.000923841	0.000999274	0.00147225	0.00136802	0.000872042	0.00307365	0.00110042	0.00117743	0.00193599	0.00223495	0.00198224	0.0021658	0.00261891	0.000844526	0.000926263	0.000381482	0.00092294	0.00116845	0.00203201	0.000349222
TGTTC	0.000698336	0.000267432	0.000346169	0.000157432	0.000508264	0.000805171	0.000729886	0.000634739	0.000368226	0.000453217	0.000788437	0.000657959	0.00051787	0.000267136	0.000489388	0.000560248	0.000640262	0.000478934	0.000589829	0.000401244	0.000606113	0.000178322	0.000140555	0.000413343	0.00040456	0.000414121	0.000732166	0.000462313	0.000625621	0.000507251	0.000362447	0.000247062	0.000130301	0.000236902	0.000725129	0.00072383	0.000123981	0.000696671	0.000742296	0.000747762	0.000696929	0.00110148	0.000229747	0.0003887	0.000197918	0.000648792	0.000712176	0.000960984	0.00030124
CTTGT	0.00116754	0.00104257	0.000547572	0.00190015	0.000728946	0.000945179	0.00177672	0.0011381	0.00107889	0.000725086	0.00133266	0.0209631	0.00150283	0.000989411	0.000731723	0.00170319	0.000968932	0.000755641	0.00108058	0.000884982	0.000632118	0.000812399	0.00112565	0.000750749	0.000688253	0.00104577	0.00226363	0.00114265	0.00187107	0.0021778	0.000536952	0.000858724	0.000747153	0.000697604	0.00104252	0.00131398	0.00046343	0.000993943	0.000419623	0.000561824	0.00128233	0.00127174	0.000229085	0.00124802	0.000192879	0.000344079	0.00148661	0.00117135	0.000268967
TAGCA	0.000606069	0.000446272	0.000778441	0.00116045	0.000397816	0.000734037	0.000726173	0.00121212	0.000886051	0.000792621	0.00046588	0.00030759	0.000474841	0.000945591	0.000381608	0.000320242	0.000441732	0.000699327	0.000975593	0.000299521	0.000656661	0.000621806	0.00101044	0.000598709	0.000382209	0.00121113	0.0013235	0.00100501	0.001698	0.00153981	0.000233575	0.000407867	0.000514648	0.000426917	0.000648304	0.0104862	0.000721999	0.000709787	0.000192065	0.000348757	0.000248577	0.000499708	0.0023742	0.0011759	0.00181976	0.000331409	0.000994468	0.0066627	0.00390456
CTAGC	0.000470361	0.000196499	0.000308767	0.000104603	0.000168688	0.000286064	0.000366693	0.000174288	0.00046928	0.000135374	0.000246586	0.000272067	7.58249e-05	0.000187987	8.53402e-05	0.000268694	0.000244899	0.000502947	0.000194667	0.000126928	0.000199536	0.000162539	8.72921e-05	8.91014e-05	6.21057e-05	0.00028766	0.000593625	0	0.000516929	0.0002875	4.62376e-05	0.00039356	0.000114001	8.72856e-05	0.000155108	0.00046634	0	0.000232137	4.87753e-05	8.11065e-05	0.000192327	0.000209633	0.000102935	0.000423201	0.000259977	0.000282389	0.000587259	0.00106762	0.000346674
TCTAG	0.000374471	5.09865e-05	0.000226623	0.000410027	0.000226802	0.000428697	0.000414922	0.000128869	0.000359529	0.000161528	0.000159967	0.000229039	0.00015737	0.00021417	0.000255508	0.00011278	0.000155797	0.000282906	0.00018222	3.31923e-05	8.02208e-05	0.000626136	0.000151804	0.000101312	0.000140615	0.00038747	0.000589032	0.000147924	0.000697512	0.000404199	0.000185355	0.00994648	0.000125754	0.000326739	0.000189336	0.000378831	0.000175951	0.000372449	0.000194362	0.000280696	0.000216269	0.000344416	0.000141581	0.000456627	0.00022587	0.000772295	0.000474739	0.00097062	0.000146897
TACTC	0.000571218	0.000658127	0.000835567	0.000426944	0.00066721	0.000934465	0.000933793	0.000603666	0.00121204	0.00109569	0.0010511	0.0106795	0.00121779	0.00062625	0.000372595	0.000400355	0.00131229	0.000820746	0.00104526	0.00102365	0.00116319	0.000257195	0.000489157	0.00125414	0.00102755	0.000509015	0.00128569	0.00182678	0.000956853	0.00073445	0.000594149	0.000424879	0.000262182	0.00173249	0.000979391	0.000774628	0.00162273	0.00121105	0.00104831	0.00211575	0.000899316	0.00132893	0.000139951	0.000641894	0.000373048	0.00934287	0.000794223	0.00138895	0.000439774
TTACT	0.00118711	0.000856187	0.00129595	0.000657174	0.000764864	0.0012544	0.00125595	0.000682926	0.00108047	0.000849862	0.00116463	0.00122522	0.00158245	0.000908432	0.000982625	0.000749641	0.0017229	0.00204985	0.00135695	0.00105133	0.000964791	0.000518448	0.000617952	0.000864722	0.000705207	0.000685119	0.0014234	0.000458632	0.00091368	0.000571445	0.000818649	0.00119907	0.000577541	0.000873482	0.00131838	0.000838293	0.000440547	0.00146841	0.00162917	0.00156783	0.00175842	0.00147153	0.00236218	0.000650836	0.000289612	0.00851619	0.000670396	0.00107903	0.000295413
GTTAC	0.00185016	0.000807895	0.000925639	0.000572498	0.000821269	0.00133808	0.00109069	0.000766706	0.000640439	0.000695714	0.00135059	0.00194134	0.00147326	0.00126972	0.00104519	0.000448154	0.00123344	0.00224126	0.00121967	0.000867881	0.00129162	0.000703461	0.000456258	0.0010496	0.00116114	0.000845524	0.00127733	0.000676595	0.000875645	0.000506446	0.000654387	0.00114108	0.00161066	0.00113123	0.00128158	0.000630026	0.000403914	0.00113199	0.00150615	0.00140706	0.0014198	0.00139628	0.00234708	0.000272642	0.000236941	0.00927277	0.000522685	0.00129526	0.000911489
CAAGG	0.000690067	0.000272705	0.000172132	0.000221529	0.000511144	0.000509485	0.000512831	0.000456424	0.000349845	0.000539129	0.00022456	0.000471508	0.000557712	0.000383766	0.000173875	0.00152585	0.000364104	0.000478522	0.000484234	0.000716108	0.00049054	0.00019041	0.000159044	0.000376548	0.000498388	0.000770402	0.00132507	0.00073018	0.000562691	0.000610665	0.000394919	0.000383399	0.000427672	0.000651753	0.000296628	0.000627528	0.000480578	0.00029008	0.000281723	0.000392157	0.000402146	0.000460063	0.00180331	0.000473922	0.000216507	0.00061898	0.00049743	0.00118015	0.000220921
TAGAT	0.000830264	0.000144465	0.000336069	0.000440487	0.000348146	0.000884468	0.000646323	0.000330879	0.000515724	0.000328772	0.000800468	0.000373225	0.000309911	0.000323743	8.60417e-05	0.0102368	0.000551703	0.000593008	0.0100054	9.96472e-05	0.000172913	0.000646696	0.000163699	9.61868e-05	0.000120893	0.000392789	0.00117573	0.000129487	0.000828779	0.000491464	0.000370157	0.00987686	0.000245834	0.000381887	0.000643669	0.000584482	9.05557e-05	0.000905573	0.000789623	0.000583532	0.000834149	0.00120882	0.000116123	0.000267088	0.000269539	0.00021154	0.00050221	0.000947352	0.000136998
GTGGC	0.0016089	0.00134433	0.00187347	0.00152387	0.00146011	0.00194602	0.0024261	0.00139102	0.00120776	0.0011909	0.00220852	0.00219618	0.00155518	0.00143176	0.00160085	0.00185918	0.00202698	0.00294403	0.00142129	0.00207023	0.00101488	0.000585424	0.00168528	0.00101908	0.00199964	0.0020108	0.00375422	0.00109738	0.00130447	0.00174826	0.00172472	0.00165194	0.00176562	0.00170354	0.00163937	0.00104145	0.00107889	0.0019639	0.00168298	0.00218228	0.00226976	0.00167026	0.00114223	0.00103166	0.000223649	0.000502324	0.00281593	0.00123667	0.000345888
CGTGG	0.00183365	0.00154265	0.00159449	0.00123906	0.00177127	0.00160139	0.00181162	0.00159062	0.0010651	0.00137003	0.00219341	0.00236958	0.00153422	0.00158556	0.0017224	0.00200772	0.00199026	0.00278562	0.00159792	0.0024955	0.000923903	0.000644408	0.00139064	0.000949024	0.00255994	0.00191207	0.00296558	0.00135852	0.00106528	0.00166319	0.00217465	0.00165547	0.00162974	0.00241345	0.00176223	0.00134545	0.00249964	0.0017162	0.00182853	0.00290252	0.00198935	0.00163724	0.00123716	0.000739185	0.000344412	0.000642933	0.00275436	0.00136322	0.000426715
ACACG	0.00258863	0.00403928	0.00292595	0.00412716	0.0030031	0.00209602	0.0224582	0.00417801	0.00446577	0.00356106	0.00381685	0.0031549	0.00456682	0.00260054	0.00335951	0.00441784	0.00360159	0.00318157	0.00473596	0.00270018	0.00317932	0.00433271	0.00425409	0.00299108	0.00372417	0.00243273	0.00338267	0.00345035	0.00251546	0.00347942	0.00169127	0.00215375	0.0024735	0.00449416	0.00407514	0.00458299	0.00372641	0.00320468	0.0026751	0.00430808	0.00343569	0.0032864	0.00405829	0.00224225	0.000452886	0.0097955	0.0038079	0.000840967	0.00315137
ACTCC	0.000407008	0.00153634	0.00235933	0.00326414	0.00180707	0.00169834	0.00262406	0.00194216	0.00245828	0.00276732	0.00248318	0.000868372	0.00215571	0.00144776	0.00260863	0.000982944	0.00205797	0.00273434	0.00228301	0.0013483	0.00171585	0.00204836	0.00360866	0.00227938	0.00375132	0.00221665	0.00296938	0.00626027	0.00267786	0.00346244	0.00245073	0.00134996	0.000862863	0.00404133	0.00222501	0.00232186	0.00437504	0.00244458	0.00152347	0.00415643	0.00218822	0.00257518	0.00393808	0.00646671	0.00237441	0.00938587	0.00168789	0.00155601	0.000903531
CACCG	0.000859603	0.00160939	0.00258765	0.00368776	0.00197193	0.00145187	0.00192563	0.00262685	0.00313567	0.00208817	0.00145128	0.00216684	0.00306253	0.00243564	0.0023591	0.00139061	0.00117677	0.00243744	0.00316388	0.000608995	0.00106599	0.00370538	0.00330726	0.00147604	0.00263854	0.00198638	0.000493673	0.00426111	0.00325009	0.00464179	0.00144088	0.00101844	0.000232307	0.00311967	0.00185957	0.00171131	0.00339866	0.00188164	0.000982562	0.00291959	0.00132042	0.00279231	0.00316285	0.0006892	0.000621403	0.00967034	0.00036044	0.00170504	0.000511008
GCACC	0.00100854	0.00154301	0.00300271	0.00300603	0.00228523	0.00132651	0.00140027	0.00289297	0.00313308	0.00284892	0.00194325	0.00203616	0.00284706	0.0025768	0.00255382	0.0015314	0.0012995	0.00236706	0.00280708	0.000753651	0.00113327	0.0039743	0.00381168	0.00169588	0.00263976	0.00195159	0.000843803	0.00379396	0.00321657	0.00405334	0.00151655	0.00103293	0.00025325	0.0023153	0.00166883	0.00191771	0.00362953	0.00191587	0.000822487	0.00228564	0.00132434	0.00251481	0.00687224	0.00623636	0.00238029	0.00929227	0.000827837	0.0024949	0.000888487
ATCAA	0.00010587	0.00063395	0.000657088	0.000397197	0.000467988	0.000201393	0.000721588	0.000653809	0.000829153	0.000910142	0.000574873	0.000742704	0.0106793	0.000852799	0.00164034	0.000483336	0.000346418	0.00190826	0.00061624	0.000614241	0.000627499	0.00147211	0.00223679	0.000629915	0.00154148	0.000270844	0.000498558	0.00145982	0.00110793	0.00205066	0.000742808	0.000279802	0.000128379	0.00159199	0.000926752	0.000971964	0.0012689	0.000347861	0.000541254	0.00142162	0.000665661	0.00160755	0.000602833	0.000265341	0.000876405	0.000447587	0.000254262	0.000245552	0.00067921
ATATC	0.000282906	0.000308382	0.000217672	0.00107362	0.000199694	0.000260312	0.000325601	0.00105274	0.000156761	0.000372665	0.00992846	0.000281148	0.000316724	0.000330234	0.000234974	0.000340383	0.000164973	0.000190695	0.000984561	0.000163621	0.000615449	0.000283026	0.000123793	0.0105547	0.000410819	0.000200978	0.000368415	0.00039979	0.000476457	0.00070132	0.000238995	9.47297e-05	0.000145588	0.00067443	0.0100925	0.000204379	0.000435117	0.000141359	0.000140184	0.000497812	0.000155406	8.42571e-05	6.68499e-05	0.000521068	3.74062e-05	0.00573531	1.07278e-05	9.60056e-05	5.96426e-05
TATAT	0.000776518	0.000268994	0.000611694	0.000307305	0.000422694	0.000537419	0.00026705	0.000385897	0.000253185	0.000142851	0.000238611	0.000714814	0.000944764	0.000667578	0.000297347	0.000421757	0.000904233	0.00011308	0.00022067	0.000567206	0.00023688	4.38217e-05	0.000394287	9.77624e-05	0.000535057	0.000324309	0.000744592	0.00086626	0.000129328	0.00031538	0.0001854	0.000277632	0.000282371	0.000547148	0.000146517	0.000290717	0.00115456	0.000257896	2.06371e-05	0.000301496	0.00029867	0.00054403	0.000335739	0	0	4.56613e-05	0.000132189	0.000227442	0
CTATA	0.000891861	0.000576266	0.000888488	0.000561903	0.00056254	0.000791538	0.000608415	0.000354771	0.000306615	0.000214554	0.00036957	0.000912034	0.00100541	0.000778756	0.00100579	0.000421757	0.000938538	0.00137677	0.000545223	0.000759186	0.000334415	0.000151121	0.000447169	0.000150627	0.000378855	0.000408281	0.000571316	0.000478491	0.000282145	0.000289912	0.000350159	0.000790845	0.000386193	0.000382512	0.000638334	0.000292822	0.000644297	0.000503025	0.00082463	0.00061914	0.000885501	0.000614099	0.000775461	5.34245e-06	0	2.94828e-05	8.80109e-05	0.000181941	2.13263e-05
ACTAT	0.00133985	0.00126042	0.00113666	0.000902019	0.00128663	0.000778091	0.000700206	0.00112492	0.000574231	0.000651441	0.00107462	0.00162879	0.00151088	0.0018445	0.00180397	0.00163078	0.00161745	0.00255999	0.0107003	0.00184536	0.000707726	0.000629155	0.000732792	0.000564262	0.00118206	0.00115606	0.00148187	0.000503809	0.000323724	0.000892612	0.00109414	0.0014632	0.00140076	0.000465685	0.000829369	0.000704551	0.000798621	0.000750093	0.00114659	0.00118322	0.00146153	0.00149041	0.00120575	0.00040848	2.39227e-05	0.000665881	0.00178717	0.000223167	0.000183188
TACTA	0.000610075	0.000499284	0.000757479	0.000455148	0.000515742	0.000700197	0.000497078	0.000364277	0.000288679	0.00024707	0.000278238	0.000489906	0.000603645	0.000778659	0.000861836	0.000316059	0.000683233	0.00170847	0.0101175	0.000604803	0.000275645	0.000149728	0.000266636	9.83485e-05	0.00036296	0.000309225	0.0004534	0.00062938	0.00030051	0.00020078	0.00050488	0.00950433	0.00030269	0.00033382	0.000755723	0.000361573	0.000508822	0.000452581	0.00101153	0.000647539	0.000890681	0.000852962	0.000650721	3.29557e-05	3.0566e-05	5.86303e-05	0.000103087	0.000156138	6.51544e-05
GTACT	0.000179233	0.000597361	0.000397237	0.000590055	0.000667539	0.000532285	0.000739156	0.000775827	0.00103286	0.000572481	0.000363669	0.0103673	0.000968124	0.000717234	0.000786842	0.000205019	0.000558438	0.000506234	0.0103251	0.000551217	0.000651379	0.000252148	0.000358011	0.000725182	0.00205986	0.000622966	0.000986626	0.00276664	0.000571456	0.000705003	0.000948899	0.00944629	0.0102648	0.00204122	0.000543298	0.000412902	0.0022724	0.000298318	0.000237236	0.00222936	0.000425521	0.000771057	6.30706e-05	0.000294378	0.000151009	0.00133846	0.000622214	0.000437941	0.000236832
CGAGA	0.00136272	0.00137364	0.000642382	0.00102382	0.00174785	0.00116326	0.00155759	0.00152394	0.00106719	0.00223551	0.00180797	0.00166375	0.0015274	0.00112622	0.00132363	0.0016779	0.00118548	0.0014649	0.00124314	0.00165864	0.00222495	0.000796972	0.00128663	0.00205295	0.00160197	0.000835607	0.0017182	0.00138555	0.000586386	0.000854023	0.000735368	0.000925663	0.00155017	0.00153649	0.0011359	0.00187526	0.0011492	0.00084483	0.000719855	0.00106599	0.000855971	0.00112205	0.000177054	0.000474056	0.000333638	8.93739e-05	0.00191529	0.000690764	0.000631822
TCGAG	0.000237653	0.000209099	0.000692324	0.000164433	0.00044922	0.000325806	9.70411e-05	0.000432416	0.00013098	0.00116004	0.000736314	0.000178097	7.47179e-05	0.000343669	0.000535739	0.00011116	2.62944e-05	0.000772478	0.000162456	0.00020999	0.000250154	0.000378118	0.000854351	0.000632277	0.000931747	5.45875e-05	6.6821e-05	0.000245321	1.79211e-05	0.000408191	0.000346411	9.65391e-05	1.52788e-05	0.000484957	8.0488e-05	0.000234225	0.000529982	5.78989e-05	3.26367e-05	0.000490239	1.09256e-05	0.000393577	0.00371316	0.00543282	0.00173718	0.000194474	0.000305966	0.0005383	0.000331906
GATAA	0.00241602	0.00262127	0.000783786	0.00138176	0.0019481	0.00116843	0.00116909	0.00209032	0.0010771	0.00151056	0.00162341	0.0023026	0.00209366	0.00153766	0.00124056	0.00361282	0.00187154	0.00152327	0.00149957	0.00254808	0.00205307	0.00220448	0.000820022	0.00210172	0.00145058	0.001589	0.00213369	0.000750767	0.000352438	0.000447342	0.000941871	0.00171777	0.0024462	0.00155259	0.000912306	0.00321884	0.00101911	0.000666986	0.00120131	0.00137362	0.000632706	0.00108616	0.000980769	0.000760391	0.000270612	0.000344289	0.003157	0.000379354	0.00275591
GGATA	0.00233115	0.00282091	0.000496335	0.000503607	0.00133149	0.000954955	0.000891205	0.00184022	0.00103309	0.00151484	0.00160695	0.00208659	0.0009987	0.00200997	0.00108372	0.00175199	0.00124129	0.00163141	0.00116365	0.00157426	0.0018566	0.00213052	0.000615307	0.0018863	0.00147958	0.00109873	0.00136425	0.00078034	0.0003688	0.000721005	0.000918364	0.00161177	0.00187828	0.00182598	0.000957291	0.00317595	0.00125619	0.000716893	0.00133104	0.00169817	0.00078673	0.00126064	0.000989864	0.000412704	0.000313989	0.000638797	0.00307878	0.000336107	0.00272528
TTATA	0.00016942	0.000612017	0.000618761	0.00107609	0.000393788	0.000719926	0.00149548	0.000732849	0.00074375	0.000930647	0.00131863	0.000882352	0.00136818	0.00056265	0.00069338	0.00033728	0.000808208	0.000400763	0.000551782	0.00107701	0.00132469	0.000305171	0.00121012	0.000981603	0.000916765	0.000717251	0.00175809	0.00130171	0.000480688	0.000570441	0.000455571	0.000440353	0.000634783	0.00238992	0.000690918	0.000854908	0.0011705	0.000695778	0.00111708	0.000873983	0.000724979	0.000735309	0.000201734	0.000406434	5.51044e-05	3.38344e-05	0.000514791	0.00184497	8.13579e-05
TGTCT	7.87147e-05	0.00144076	0.00287293	0.00300099	0.00129335	0.000923336	0.00235464	0.00213776	0.00387911	0.0024116	0.00144988	0.000669459	0.00204649	0.00213513	0.00139865	0.00177197	0.00143806	0.00149916	0.00242128	0.000964716	0.00100236	0.00276024	0.0034654	0.00118743	0.000967441	0.00162093	0.00185824	0.00147907	0.00149141	0.00200551	0.00052574	0.000378342	0.000506045	0.00178594	0.00108042	0.000450033	0.0015237	0.00185961	0.000718161	0.00159795	0.00137052	0.00106624	0.00158817	0.00130972	0.000144375	0.000477637	0.000524496	0.000434522	0.000180935
CTGTC	0.000354615	0.00145178	0.00308153	0.00273974	0.00153383	0.00123378	0.00241878	0.00189454	0.00315567	0.0021662	0.00186426	0.00111906	0.0023088	0.00174428	0.00148098	0.0017931	0.00151764	0.000969406	0.00229065	0.00126413	0.00128796	0.00212195	0.00343156	0.00161383	0.000799435	0.00213236	0.00260846	0.00113478	0.00153177	0.00174437	0.000493961	0.000609628	0.00128686	0.00183338	0.0011066	0.000467651	0.00117614	0.00180504	0.000701208	0.00099148	0.00127306	0.00100236	0.000511616	0.00132937	0.000115184	0.000316511	0.000540413	0.00179263	0.000178139
CATTC	0.000985215	0.00207511	0.00279616	0.00288219	0.00278794	0.0211792	0.00173007	0.00209283	0.00201569	0.00352349	0.0024413	0.00126395	0.00159959	0.00210428	0.00337485	0.00200188	0.00287922	0.0037778	0.00235158	0.0023927	0.00170845	0.00263154	0.00263862	0.00244629	0.002085	0.00218291	0.000860396	0.00311939	0.00266297	0.00347778	0.00192767	0.00184855	0.000457065	0.00244376	0.00185273	0.00158378	0.00264889	0.00191355	0.00182165	0.00306534	0.00200588	0.00249927	0.00453701	0.00598694	0.00244208	5.22282e-05	0.00067863	0.00154538	0.00079347
GCCAT	0.00019344	0.00124444	0.00263089	0.00292895	0.00161646	0.00130181	0.00144317	0.00215664	0.00291798	0.00188069	0.0011912	0.000705196	0.00208481	0.0214175	0.00202583	0.00132049	0.00134901	0.0018685	0.00247615	0.00028419	0.00123932	0.00344139	0.00298668	0.00154894	0.00162945	0.00190469	0.00108069	0.00355273	0.00278841	0.00374233	0.00125926	0.000930718	0.000215133	0.00272484	0.00135167	0.00126792	0.00273964	0.00186668	0.000786657	0.00241245	0.0011867	0.00221309	0.00313232	0.000934469	0.000546236	0.00960049	0.000524391	0.000419557	0.000493068
GAGCC	0.0012286	0.00217065	0.0010683	0.00171057	0.00136589	0.00162243	0.00267988	0.0012677	0.001256	0.00129486	0.00190538	0.00166091	0.00149412	0.00105705	0.000593942	0.00169396	0.001467	0.00131515	0.00132024	0.00125015	0.00214482	0.00086057	0.00202657	0.00205824	0.00150175	0.00119395	0.00356033	0.00160923	0.000863403	0.00131861	0.000763701	0.000900747	0.00179574	0.0014867	0.00101383	0.00108007	0.00114035	0.00135135	0.000700882	0.00120769	0.00141272	0.00112601	0.00013137	0.00117038	0.000251409	0.000101406	0.00301875	0.000596076	0.00102124
TGGGA	0.000647762	0.00132315	0.00159723	0.00209377	0.00217568	0.000736323	0.000742076	0.00146936	0.00181176	0.00193104	0.0012979	0.000819475	0.00133203	0.000637955	0.00177022	0.00182428	0.00239727	0.000874246	0.00161876	0.00181588	0.00109609	0.000809218	0.00120965	0.00126722	0.00160147	0.00111044	0.000504501	0.0015356	0.00175493	0.00222576	0.00111047	0.000332909	0.000195674	0.0017692	0.00197819	0.00152494	0.00163301	0.00110042	0.000415703	0.00170094	0.00187002	0.00132943	0.00176999	0.00123038	0.000126801	0.00016995	0.000537144	0.000757656	0.000171255
GGTGG	0.000304839	3.84324e-05	0.000161823	0.000155916	0.000188102	0.000427773	0.000350676	0.000211951	0.000100625	0.00010547	0.00010989	8.86458e-05	0.000117005	0.000333017	0.000199645	9.55916e-05	8.30504e-05	0.000174785	7.24398e-05	3.51766e-05	0.000236858	0.000151195	0.0001277	0.000355614	0.000698262	0.000484476	0.000305841	0.0011176	0.000248165	0.000328361	0.000632402	0.000314756	0.000116933	0.000753492	0.000287933	0.000180781	0.000963576	0.000261519	7.80909e-05	0.00069659	0.000324509	0.000276037	0.000158771	0.000341937	8.69064e-05	0.000526831	7.56567e-05	0.00016354	3.25752e-05
GGGTG	0.000262145	9.71865e-05	0.000130522	1.90268e-05	0.000209725	0.000404277	0.000222671	0.000139676	0.00017811	0.000156388	0.00012038	0.000227977	0.000247149	0.00047533	5.83606e-05	3.76287e-05	9.69879e-05	2.77901e-05	4.89132e-05	0.00013201	0.000152083	9.34233e-05	0.000154509	0.00014189	0.00129442	0.000342958	8.53785e-05	0.0010376	7.64637e-05	0.000220101	0.00145598	0.000274538	5.55624e-05	0.00060405	0.000120549	8.54201e-05	0.00139358	0.000144042	0.000118754	0.000694406	9.08349e-05	0.000217205	6.62048e-05	0.000299808	4.28187e-05	7.40499e-05	5.44762e-05	0.00036283	0.0025283
ATCAT	0.000541974	0.000479222	0.000838456	0.000904344	0.00042803	0.000634176	0.000584622	0.000433274	0.00041933	0.000299951	0.0197491	0.000615088	0.000746565	0.000592788	0.000979178	0.000478938	0.000826904	0.00132866	0.000234062	0.000647378	0.000319696	0.000818274	0.000467953	0.000184965	0.000220357	0.000818355	0.000594662	0.00025103	0.00984434	0.000171524	0.000609715	0.000764911	0.000458332	0.000353534	0.000488112	0.000193453	0.000167646	0.000624285	0.00104412	0.000461107	0.000863655	0.000587842	0.000617763	6.82456e-05	2.47269e-05	1.60088e-05	3.2469e-05	0.000126448	4.36271e-05
CCATC	0.000777979	0.000444089	0.000148871	0.000943738	0.000448402	0.000283063	0.000640356	0.000841071	0.00036586	0.000520409	0.000701767	0.00213219	0.00135906	0.000509167	0.000929921	0.000105741	0.000389802	6.07286e-05	0.000580168	0.000504328	0.000552997	0.000191076	0.000145898	0.000611552	0.00217102	0.00048668	0.000309301	0.000934916	0.000220155	0.000401073	0.00104672	0.000263338	0.000595076	0.00237827	0.000356617	0.000655988	0.00117673	0.000392009	0.000211969	0.00117372	0.000268616	0.000397031	4.78084e-05	0.000391018	6.75109e-05	5.29818e-05	0.000944056	0.000323772	9.7956e-05
GGCCA	7.66815e-05	0.000117558	4.31116e-05	4.70043e-05	9.93221e-06	1.67046e-05	4.30714e-05	0.000135544	4.87134e-05	7.59598e-05	8.02653e-05	0.000239927	7.10995e-05	3.75947e-05	5.59018e-05	7.16787e-05	0.000160114	5.64057e-05	2.88077e-05	9.45782e-05	0.000126685	5.32188e-05	6.18323e-05	0.000167055	3.27503e-05	9.43158e-05	1.7979e-05	0.000119771	4.59901e-05	7.06519e-05	0.000126106	3.91094e-05	4.03229e-05	0.000307693	8.13852e-05	6.55109e-05	3.47325e-05	8.79643e-05	2.08003e-05	0.000604712	0.000327804	3.66128e-05	0.000102296	0.000438454	4.11643e-05	0.000116344	4.33417e-05	0.000104164	8.14592e-05
CAAAA	0.00234773	0.00389896	0.00444686	0.00457787	0.00312981	0.00155287	0.00276582	0.00460269	0.00576686	0.00485034	0.00307797	0.00314781	0.00459432	0.00341688	0.0035695	0.00501949	0.00436213	0.00330101	0.00525682	0.00258105	0.00254973	0.00614148	0.00532918	0.0031057	0.00375603	0.00302542	0.00186321	0.00341128	0.00250559	0.00333317	0.00157597	0.00183879	0.00180499	0.00470543	0.00195414	0.00387788	0.0048195	0.00322355	0.00170804	0.00457441	0.00212281	0.00146229	0.00492702	0.00235017	0.00024404	0.00149482	0.00306257	0.00175797	0.0027395
ACAAA	0.00239644	0.00316271	0.00221986	0.00291634	0.00237968	0.00104206	0.00161734	0.00316758	0.00323474	0.00319655	0.00226438	0.0028834	0.00271183	0.00227901	0.00233753	0.00319235	0.00218639	0.00225705	0.00280454	0.00309223	0.00210346	0.00403922	0.00291695	0.00243456	0.00277701	0.00167777	0.00186198	0.00258588	0.00120362	0.00156584	0.00125257	0.00180285	0.00188686	0.003189	0.00144731	0.00339494	0.00270703	0.00184912	0.00139567	0.00243745	0.00125366	0.00075297	0.00231908	0.00156135	0.000234164	0.000829881	0.00306623	0.00183815	0.00258265
TGACT	0.00256102	0.00287929	0.000723194	0.0021948	0.00101892	0.00139572	0.00290905	0.00210808	0.00126744	0.00201834	0.0029196	0.00131137	0.00147446	0.00171175	0.001088	0.00116079	0.00164172	0.00259801	0.00152899	0.00195365	0.0018048	0.00121017	0.00246299	0.00211869	0.00114052	0.00169098	0.00370994	0.00172714	0.00082069	0.000731817	0.000960522	0.00216696	0.00411116	0.011321	0.00196154	0.00117459	0.00120113	0.00155604	0.00128288	0.00137784	0.00166781	0.00155743	0.000179424	0.00135751	0.000435181	0.00279736	0.00261764	0.000331584	0.000330059
TGATT	0.00307144	0.00228608	0.00150268	0.00146025	0.00183899	0.00119152	0.000773598	0.00181307	0.000749408	0.00167384	0.0120571	0.0017761	0.0103955	0.00190508	0.00179938	0.0018719	0.00155833	0.0122418	0.00108076	0.0117241	0.00223526	0.00214433	0.00108432	0.00267383	0.000531116	0.00109045	0.000542864	0.0109273	0.0111995	0.00185965	0.000968915	0.00234388	0.00294267	0.000733845	0.00141684	0.00150096	0.000917199	0.00134199	0.001677	0.00117545	0.00159355	0.00171909	0.000832349	0.000210215	0.000306288	5.31686e-05	0.00294297	0.000115367	0.000209333
AAACA	0.00161106	0.00110929	0.000711101	0.000217435	0.00137968	0.000281362	0.00051832	0.00080831	0.000678489	0.00105162	0.000969048	0.00122343	0.00114732	0.000623113	0.00104046	0.00132797	0.000510671	0.00087436	0.000305496	0.00260834	0.000890468	0.00151252	0.00128536	0.00109016	0.00075464	0.000287168	0.000483112	0.000207644	0.000529763	0.000690433	0.000226464	0.000590326	0.00137815	0.000907835	0.000491176	0.000681775	0.000760255	0.000195031	0.000351788	0.000784086	0.000125514	0.000115947	0.0020983	0.000350853	0.00023993	6.9949e-05	0.00159363	7.80508e-05	0.000186077
CAAAC	0.00145382	0.000991155	0.000499046	0.000932082	0.000556933	0.000241225	0.000655926	0.000943548	0.000335426	0.000925611	0.000918293	0.00124206	0.00151633	0.000556875	0.000944893	0.000996088	0.000446819	0.000771171	9.85422e-05	0.000928773	0.000856776	0.0014499	0.00120162	0.00104568	0.000636585	0.000137039	9.23073e-05	0.000645674	0.000589789	0.000802091	0.000373168	0.000536395	0.00157277	0.00103821	0.000476565	0.000454959	0.000729314	0.000232411	0.00027267	0.000575109	0.000193411	0.000142565	0.000791586	0.000693151	0.000176184	3.69379e-05	0.00157718	0.000117322	0.000238384
ATTCG	0.00254328	0.00344771	0.000995213	0.00111819	0.00229153	0.000977895	0.00119925	0.00233665	0.00173069	0.00225384	0.00252596	0.00329286	0.00156285	0.00192146	0.00200291	0.00324196	0.00256361	0.00278863	0.00196196	0.00346834	0.00230626	0.0218916	0.00107806	0.0024961	0.00229159	0.00225332	0.00224149	0.00179651	0.000530983	0.00133824	0.00130418	0.00232045	0.00277264	0.00207466	0.000980827	0.00360671	0.0016686	0.00124477	0.00137272	0.00219656	0.00117706	0.000865853	0.00121226	0.000882112	0.000165799	0.000446585	0.00471072	0.000513356	0.00263171
ACGTC	0.000917878	0.0025347	0.00234702	0.00311403	0.00274229	0.00142821	0.00122073	0.00235735	0.0027497	0.00169158	0.00181272	0.00188969	0.0018715	0.00135757	0.00309725	0.00339755	0.0030661	0.00244896	0.00343945	0.00169206	0.00119712	0.00337218	0.0023629	0.00123925	0.000978998	0.00222371	0.000992205	0.00204184	0.0033537	0.00395082	0.000809886	0.00202547	0.000745616	0.00164129	0.00300119	0.00413781	0.00122249	0.00202186	0.00178188	0.0017411	0.00292995	0.00269355	0.00235453	0.00118553	0.000687598	0.00885896	0.00158619	0.000354405	0.00267718
GACAC	0.000888916	0.00207874	0.00221422	0.0035871	0.00205231	0.000936117	0.00148181	0.00296746	0.00315906	0.00207329	0.00162422	0.00177861	0.0029157	0.00143112	0.00246058	0.00320507	0.00163286	0.00137385	0.00326125	0.00139482	0.00111506	0.00352092	0.00307741	0.00108325	0.00131381	0.00156264	0.00105584	0.00127343	0.00188818	0.0027067	0.000492446	0.00117572	0.000525396	0.00181901	0.002381	0.00336287	0.00144684	0.00175359	0.00127568	0.00156231	0.00193012	0.00137764	0.00223231	0.00166204	0.00032606	0.000682216	0.00134754	0.000390049	0.00252295
TGACA	0.000341342	0.0011565	0.00173123	0.00177518	0.00108164	0.000726386	0.000927155	0.0020225	0.00193299	0.00173543	0.000866612	0.000807875	0.00211892	0.00163601	0.00141302	0.00220359	0.000816617	0.000597608	0.0019654	0.000916908	0.000665994	0.00219332	0.00232098	0.000786093	0.000620301	0.00116014	0.000879439	0.000857452	0.00105324	0.00143411	0.000353987	0.00033132	0.000800022	0.00126997	0.000535577	0.000511302	0.000707436	0.000949735	0.000307934	0.000653727	0.000574703	0.000491742	0.0014166	0.000881131	0.000308673	0.000333459	0.000108293	0.000269771	0.000274565
AATAG	0.00171174	0.00330928	0.0015992	0.00271276	0.00321721	0.00130954	0.00141093	0.00277238	0.00162649	0.00144042	0.00301423	0.00305058	0.00187956	0.00227967	0.00349801	0.00381041	0.00233326	0.00375036	0.00300441	0.00312035	0.011274	0.00379028	0.001913	0.00181727	0.00182873	0.00303409	0.00248086	0.00221717	0.00213223	0.00385827	0.00185121	0.00290781	0.00249381	0.00107505	0.00296153	0.0043419	0.00133301	0.00194686	0.00181731	0.0018576	0.00196534	0.00255631	0.00163742	0.000639576	0.000551985	9.98225e-05	0.00494115	0.000380203	0.00291974
CCGCC	0.000169529	0.000183231	0.000162047	0.00102546	0.000193326	8.73929e-05	0.00031972	0.000317606	0.00053011	0.000417081	9.73942e-05	0.000335544	0.00121049	0.000380888	0.000256095	0.000282661	0.000255744	0.000421068	0.000543855	0.000191328	0.000249059	1.09282e-05	0.000217792	0.000156313	0.000812167	0.000153076	0.000235879	0.000397732	0.000174216	0.000135158	0.000350116	0.000115085	9.26159e-05	0.00116419	0.000251723	0.0005955	0.00114326	0.000330374	0.000144968	0.000939849	0.000133029	9.50924e-05	5.34134e-05	0.000358203	8.43652e-05	0.000631584	0.000121215	0.0015262	0.000149451
CTGTA	0.000792432	0.000708125	0.00190971	0.00149414	0.00135257	0.000697787	0.000690852	0.00133564	0.000951895	0.00241494	0.00175189	0.000673347	0.000908992	0.00117458	0.00189748	0.000669989	0.000895341	0.0118132	0.00103566	0.000808826	0.000899581	0.00216448	0.00246623	0.00126338	0.00143674	0.00120224	0.000521967	0.00995274	0.00149249	0.00187026	0.00103961	0.00108794	0.0002517	0.00170625	0.0010737	0.000989155	0.0011692	0.000970407	0.000640083	0.00108742	0.000843091	0.00143631	0.0077648	0.0111431	0.00400159	0.000220313	0.000858376	0.00259398	0.00110879
CCTGT	0.000560745	0.0204962	0.00358227	0.0205943	0.00172855	0.000370559	0.00140355	0.00157638	0.00282991	0.00293975	0.00156832	0.000865313	0.00191495	0.00151133	0.00195585	0.00224283	0.0011249	0.00197586	0.00127874	0.0015084	0.000708117	0.00247265	0.00306121	0.00126738	0.00113903	0.000943338	0.000822676	0.000398442	0.00106834	0.00159828	0.000377746	0.000316271	0.000167575	0.00146789	0.00062167	0.00038647	0.00142762	0.000933952	0.000395323	0.00130219	0.000649171	0.000512239	0.00842333	0.0113769	0.00346168	0.000162614	0.000784985	0.00385762	0.000871371
CCCCT	0.000363288	0.0012864	0.00148072	0.00164286	0.000904335	0.000474927	0.00122992	0.000950147	0.0019331	0.00104129	0.000312902	0.000472333	0.00124359	0.00118923	0.000604088	0.00176087	0.00101325	0.000847647	0.000713306	0.00101152	0.000461669	0.000803742	0.000439391	0.000320846	0.00116377	0.0104649	0.00141185	0.000830863	0.000549818	0.000778871	0.000427729	0.000275658	0.000463312	0.00168412	0.000565934	0.000449565	0.00116828	0.00063506	0.000524727	0.00122193	0.000587735	0.000557386	0.000456889	0.000585078	0.0001018	6.18798e-05	0.000312889	0.000274284	0.000162564
AACAC	0.000187323	9.06793e-05	0.000167343	8.67513e-05	0.000436566	0.000143208	0.000157784	0.00023987	0.000269133	0.000165106	0.000151782	0.000182366	0.000318697	0.000245954	0.000278377	0.000331356	6.43789e-05	0.000392447	0.000102503	0.000984196	0.000340781	5.43214e-05	0.000105455	0.000310631	0.000589788	0.000121202	0.000111882	0.000630707	1.80112e-05	0.000101322	0.000165498	4.29782e-05	4.20837e-05	0.000463543	0.000227905	0.000173289	0.000448263	4.06792e-05	0.000213259	0.000546725	0.000163446	0.000497709	0.00016635	7.42116e-05	0.000456685	0.000206368	6.08228e-05	4.75217e-05	0.000374567
GAAAC	0.000649717	0.000859257	0.000553105	0.000386714	0.00111809	0.000427325	0.000531296	0.000741866	0.000734836	0.000694755	0.000464807	0.00109814	0.00050898	0.000601344	0.000524781	0.000585225	0.000697485	0.000214828	0.000467298	0.0022369	0.000758454	0.000294167	0.000280138	0.000971664	0.000724606	0.000959869	0.00162195	0.00060377	0.000204168	0.000394999	0.000637201	0.000632291	0.00123658	0.00101766	0.000434482	0.000454815	0.000567646	0.000350894	0.000309148	0.000573492	0.000221056	0.000350529	0.000210545	0.00037526	0.000183493	0.00749472	0.00014184	0.000270645	9.59775e-05
AATGA	0.00154414	0.00279557	0.0035219	0.00383053	0.00347632	0.00226783	0.00251448	0.00304475	0.00320615	0.00364132	0.00233108	0.00235508	0.00332008	0.0025518	0.00371572	0.00388132	0.00375406	0.00380466	0.00321308	0.00402061	0.00214203	0.00260802	0.00289665	0.00291044	0.00332737	0.00348007	0.00267722	0.00294894	0.0025898	0.00348337	0.00257843	0.00230166	0.0014175	0.0125009	0.00202407	0.00200006	0.00291183	0.0026303	0.00198052	0.00323831	0.00246499	0.00272492	0.0046331	0.00667345	0.00256047	0.00016171	0.000852281	0.00141064	0.000910868
GTACA	0.000444159	0.00128097	0.00113953	0.00298496	0.00109004	0.000813733	0.00201703	0.00127614	0.00179271	0.00133811	0.00156248	0.000923886	0.0116471	0.00061486	0.00163078	0.00103206	0.00153448	0.0111086	0.0013959	0.0111922	0.00136168	0.000438149	0.00174693	0.00125677	0.00276047	0.00115436	0.00238363	0.0113419	0.01058	0.00188806	0.00120099	0.000411438	0.000608972	0.00421661	0.00243517	0.00138769	0.0022981	0.00145492	0.000816904	0.00243937	0.00239252	0.00182399	0.000141361	0.00141184	0.000164813	0.000599386	0.00112496	0.00080465	0.000213
TCGCA	0.000470875	0.00110854	0.000331295	0.000440817	0.000811376	0.000229542	0.000281015	0.000975318	0.000394179	0.000742217	0.00111835	0.00125268	0.000486801	0.000918115	0.000911206	0.00146452	0.000704313	0.00118095	0.000580848	0.00165828	0.000993427	0.000682581	0.000364285	0.000919493	0.00116714	0.000854412	0.000968474	0.000576308	0.00025588	0.000840643	0.00111449	0.00088714	0.00112695	0.000684129	0.000200349	0.000500753	0.000907489	0.000364217	0.000165873	0.000963709	0.000412011	0.000209646	0.000542858	0.000294222	0.000114219	0.00808336	0.00183089	0.000111574	0.000252876
TATGA	0.000607564	0.00105752	0.000738347	0.0012778	0.000786382	0.00100863	0.00181981	0.00116269	0.00111645	0.000844725	0.00149346	0.00259486	0.0021802	0.000586753	0.00102285	0.000603188	0.00148358	0.00034298	0.000797232	0.000679565	0.00141151	0.000426318	0.0013445	0.00108531	0.00230228	0.00186204	0.00258094	0.00183371	0.000572511	0.000658813	0.0010086	0.000453078	0.00103817	0.00302892	0.00101187	0.00153408	0.00197927	0.000963625	0.000812043	0.00150522	0.000793631	0.0011319	0.000161194	0.000460115	6.24016e-05	0.000274299	0.000531288	0.000406455	8.00746e-05
ATATG	0.000335829	0.000286374	0.000223238	0.00042152	0.000318193	0.000335847	0.000615319	0.000427536	0.000443272	0.000471669	0.000503583	0.00129865	0.000883416	0.0101139	0.000277057	0.000149003	0.000361924	0.000278479	0.000490744	0.000167042	0.000437346	0.000156232	0.000151144	0.000277346	0.00142114	0.000241559	0.000835279	0.00137751	0.000489152	0.000491411	0.000580471	2.37547e-05	0.000121528	0.00228968	0.000411294	0.000432154	0.00163321	0.000270159	7.99169e-05	0.000835646	2.87863e-05	0.000282218	0.000105181	8.69995e-05	6.90837e-06	5.72304e-05	0.00015474	0.000439005	2.68231e-05
TTAAG	6.29063e-05	0.000124262	0.000117747	4.93348e-05	7.4424e-05	2.96097e-05	1.37173e-05	4.09829e-05	7.0959e-05	0.000227386	2.43959e-05	3.37583e-05	7.77271e-05	6.46133e-05	5.67206e-05	0	0.000115623	0	0.000220922	0	4.55923e-05	6.37323e-05	0.000171765	4.38786e-05	0.000895045	5.50668e-05	4.0657e-05	0.000374705	2.0599e-05	0	0.000567027	4.09801e-05	0	0.000261182	2.67158e-05	0	0.000912331	2.98053e-05	0	0.000427804	1.46393e-05	0	0.00158698	0.000259502	0.000132128	0.000774475	2.76906e-05	0.00021613	0.000173583
ATTAA	0.000573065	0.0017731	0.00263467	0.00198913	0.00220058	0.000942113	0.00118396	0.00206453	0.00270371	0.0311344	0.00160804	0.00154695	0.00215551	0.00269524	0.0026781	0.00275876	0.00141545	0.00314076	0.00222951	0.00137748	0.00104002	0.00345382	0.0126658	0.00120787	0.00197578	0.00207039	0.00110547	0.00251966	0.00303952	0.00462223	0.00144393	0.00147186	0.0010631	0.00119765	0.00169326	0.00142606	0.00164852	0.00170426	0.000920437	0.0020948	0.0016383	0.00256541	0.00260051	0.000278229	0.000546551	0.00205111	0.00201888	0.000167382	0.000652145
TGGAG	0.000957815	0.00089211	0.000767164	0.00125315	0.0011912	0.000468986	0.00112228	0.0014348	0.000819593	0.00178861	0.0013713	0.0022079	0.00138948	0.000758368	0.00131554	0.000396701	0.000542071	0.000769687	0.000795472	0.00210882	0.00149035	0.000701106	0.00105995	0.00164887	0.00173508	0.000926371	0.00098416	0.000961249	7.75755e-05	0.000647532	0.000995117	0.000325351	0.000680899	0.00243894	0.000811236	0.000922468	0.00111035	0.000282329	0.000321155	0.00105702	0.00023866	0.000243761	0.00393122	0.00610764	0.00197914	4.53402e-05	0.00127223	0.000874413	0.000549247
CTCCT	0.00023772	0.000552736	0.000389283	0.000340987	0.000383715	0.00030885	0.000467119	0.000510306	0.000547041	0.000488562	0.000295175	0.00048904	0.000642976	0.000392308	0.000413116	0.000247164	0.000487044	0.000613922	0.000347292	0.000411281	0.000905279	0.000399709	0.000309713	0.000691735	0.00196034	0.000970835	0.000605458	0.00190043	0.000259861	0.000426955	0.00123246	0.00011262	0.000108463	0.00170366	0.000333767	0.000310487	0.00239975	0.000299664	0.000208326	0.00156868	0.000270211	0.000219111	0.00024536	0.000684986	0.000148198	0.00902923	0.000408368	0.00051074	8.52638e-05
CGCGC	0.00045468	0.00126011	0.00105016	0.000412378	0.000574528	4.44407e-05	0.000224231	0.000776983	0.000344154	0.00209941	0.00140015	0.00024923	0.000358603	0.0199102	0.00103002	0.000118695	0.000354876	0.00123612	0.000525567	0.000746073	0.0199201	0.00110491	0.00162963	0.0405411	0.000268336	4.18829e-05	0	0.000305826	1.80112e-05	0.000495546	0.0001695	0.000101369	7.19051e-05	6.63712e-05	0.000149634	7.89587e-05	9.10093e-05	2.91312e-05	0.000252159	0.000616525	4.19363e-05	6.66739e-05	0.00729627	0.0107531	0.00359354	0.000130605	0.00115279	0.0010743	0.00144429
TGCGC	0.000925893	0.00211804	0.00405444	0.00386503	0.00253482	0.00232471	0.0019464	0.00313278	0.00276542	0.0035361	0.00273799	0.00128058	0.00265003	0.00322348	0.00312086	0.0017721	0.00220259	0.0026185	0.00348427	0.00115813	0.00211471	0.00501166	0.00415172	0.00288436	0.00317083	0.00353243	0.00184609	0.00559769	0.00393248	0.0044818	0.00271985	0.0024114	0.000891039	0.00340929	0.00222496	0.00220903	0.00425626	0.00294314	0.00185556	0.00331977	0.00212939	0.00381384	0.00665163	0.00634453	0.00406818	0.00195428	0.00103358	0.00638448	0.00460254
AATTT	0.000545628	0.0102948	0.0022384	0.00187009	0.0011768	0.0005665	0.00127289	0.00244769	0.00255769	0.0126439	0.00166067	0.000949288	0.00215707	0.00235928	0.00203262	0.00152214	0.000863861	0.0022138	0.00214897	0.0009612	0.00130894	0.0124764	0.0128846	0.0014789	0.0109778	0.00100275	0.000629475	0.00157223	0.00134762	0.00252866	0.000404211	0.000456385	0.000190592	0.00133003	0.00106881	0.00111262	0.00114726	0.00100137	0.00055204	0.00109755	0.0101204	0.00134604	0.00542281	0.00636194	0.00234466	0.000309857	0.000490486	0.00584164	0.00426649
GTCGG	0.000334692	0.00024205	0.000629336	0.000510649	0.000241744	0.00016301	0.000277378	0.000506551	0.000369607	0.00161849	0.00108072	0.000296363	0.000268218	0.000441251	0.000687174	9.27073e-05	0.000345097	0.000814803	0.000403612	0.000480141	0.000299289	0.000532024	0.00168024	0.000566472	0.00090262	0.000479159	0.000647363	0.0014431	0.000222056	0.00043303	0.000693446	0.000231003	0.000300934	0.00145651	0.000291796	0.000140361	0.00130096	0.000423881	0.000151975	0.00113066	0.000321804	0.00011085	0.00380064	0.00550347	0.00172864	0.00103781	0.000520787	0.000692682	0.000487727
GGTCG	0.000343137	0.000163292	0.000685944	0.000563787	0.000449438	0.000178604	0.00028121	0.00062982	0.00037608	0.00128961	0.000726001	0.000265565	0.000661332	0.000266173	0.000795707	0.00113428	0.00038217	0.000790393	0.000445956	0.000432724	0.000447147	0.000508299	0.000866461	0.000536455	0.00122059	0.000227817	0.000484254	0.00170043	0.00016582	0.000417377	0.000748034	0.000120942	0.000230248	0.00139526	0.000122756	0.000174649	0.00152477	0.00017742	0.000155417	0.00122096	0.000141982	0.000110563	0.00374308	0.00539706	0.00180762	0.000826285	0.000575755	0.000727157	0.000376775
GGGTC	0.000200125	0.00014028	0.00055508	0.000220448	0.000355164	7.54391e-05	0.000118321	0.00036292	0.000215934	0.00115092	0.000715968	0.000214747	0.000162898	0.000191367	0.000543705	3.19283e-05	0.00014682	0.000730727	0.000213316	0.000208746	0.000285743	0.000556575	0.000827387	0.000468234	0.0001169	0.00013208	0	0.000102298	0	0.000265331	7.38766e-05	0.000100606	0.000130872	0.000241538	8.15723e-05	5.05634e-05	9.91186e-05	8.0061e-05	8.74882e-05	0.000187272	1.67897e-05	4.33072e-05	0.00374968	0.00535912	0.0017895	0.000495998	0.000353167	0.000535304	0.000480918
GTTAT	0.000369621	0.000766002	0.000977899	0.0109061	0.000713663	0.000950034	0.00158376	0.000875538	0.000860839	0.00187996	0.00208968	0.000659696	0.000956889	0.000726373	0.0010628	0.000345119	0.001006	0.00122136	0.000997321	0.000947353	0.00116036	0.00055833	0.00208537	0.00126533	0.000433533	0.000636478	0.00168286	0.000617722	0.000483737	0.000727847	0.000381373	0.000477057	0.000618306	0.000696653	0.00115134	0.000883751	0.00040152	0.00112735	0.00140224	0.000925276	0.00118116	0.00142075	0.00383054	0.00579332	0.0018171	0.0010508	0.000769159	0.000912412	0.000572838
AGTCC	0.000627902	0.000904278	0.00252811	0.00199093	0.00110668	0.000358343	0.000890737	0.00207081	0.00211309	0.00369059	0.00225555	0.000755312	0.00148342	0.00155555	0.00185131	0.00132076	0.000802276	0.00205457	0.00196098	0.00112502	0.00115378	0.00297686	0.00384526	0.00169424	0.000740504	0.000816401	0.000258271	0.00120671	0.00109229	0.00188692	0.000371266	0.00029047	6.89214e-05	0.00121155	0.0006331	0.000549987	0.00145709	0.000920584	0.000312109	0.000910407	0.000400811	0.000486299	0.00914235	0.0116219	0.00347558	0.000347408	0.000877355	0.00124586	0.000738214
GAGTC	0.000441806	0.000605378	0.00128126	0.0014694	0.000941797	0.000526324	0.0013232	0.00105267	0.0011404	0.00326981	0.00248931	0.000324892	0.000664713	0.000747614	0.00189245	0.000369929	0.000923612	0.00212452	0.0012966	0.00110352	0.00166255	0.000822987	0.00300433	0.00216933	0.00113216	0.000929272	0.00137443	0.00151314	0.000341999	0.00106562	0.00111351	0.000545779	0.0007483	0.00114231	0.00128681	0.00064705	0.000860879	0.000937308	0.000749678	0.00162047	0.000892247	0.000782056	0.00753382	0.0112482	0.00352324	3.42831e-05	0.000892805	0.00142182	0.000652473
TCGAA	0.000259885	0.000354006	0.00150714	0.000515827	0.000549979	0.000148215	0.000296264	0.00061482	0.00107396	0.00193105	0.000841687	0.000616558	0.000974379	0.000717919	0.000509845	0.000885468	0.00165371	0.001358	0.000829907	0.000680041	0.00057727	0.000510157	0.00133156	0.00061207	0.000416457	0.001395	0.000834966	0.000715728	0.000170088	0.000340641	0.000209749	7.722e-05	8.89486e-05	0.000778416	0.000348494	0.000216576	0.000562911	0.000793308	0.000310575	0.000613874	0.000516697	0.000538207	0.00372174	0.00595486	0.00173951	5.48074e-05	0.00031594	0.00215794	0.000325444
TTAAA	0.000565312	0.000665097	0.00218205	0.00156453	0.00143878	0.000612684	0.000351096	0.00159983	0.000857425	0.0130312	0.00239464	0.000244208	0.000477269	0.00108583	0.00201732	0.000453897	0.00051445	0.00258073	0.00121991	0.000841934	0.000941158	0.00253558	0.0125573	0.00169814	0.000433639	0.000939267	0.000232324	0.00106065	0.00135545	0.00200004	0.000645627	0.000932022	0.000118462	0.000270714	0.000594785	0.000917462	0.00066259	0.000815638	0.000519956	0.000549588	0.00056352	0.00135356	0.0128939	0.0164806	0.00569247	0.000575844	0.00114964	0.00152044	0.00132919
GTTAA	0.000866632	0.00221179	0.00383317	0.00327731	0.00309591	0.00154078	0.00154878	0.00303288	0.00341815	0.00265846	0.00266129	0.00183526	0.00245125	0.0036079	0.00390538	0.00291481	0.00226839	0.00470732	0.00290101	0.00191308	0.00154271	0.00509754	0.0235469	0.00203913	0.00282709	0.0029512	0.00137845	0.00400697	0.00441789	0.0062213	0.00262141	0.0023471	0.00117857	0.00133872	0.00247825	0.00235297	0.00258447	0.00256274	0.00136717	0.0026226	0.00230124	0.00409275	0.00630191	0.00573206	0.00288366	0.00131737	0.00255457	0.000863214	0.00141614
CGTTA	0.00038122	0.00110981	0.00142288	0.0013211	0.00140081	0.000726281	0.000464336	0.00143401	0.00090445	0.00212863	0.00145512	0.000431337	0.000836086	0.00133628	0.00194192	0.000702204	0.00059074	0.00196278	0.00130593	0.000983067	0.00139384	0.00220887	0.0213421	0.00151725	0.00130033	0.0010412	0.000360112	0.00231567	0.00183375	0.00244638	0.00105064	0.00105489	0.000146979	0.000971206	0.00093419	0.00156757	0.00149313	0.00093944	0.000852337	0.00128957	0.000867774	0.00190928	0.00544561	0.00545108	0.00239426	0.00912439	0.000610539	0.000981677	0.00101097
CGGAC	0.000151533	1.26852e-05	6.68736e-05	2.84043e-05	5.12192e-05	4.37269e-05	8.86735e-05	5.66123e-05	8.31354e-05	0.000104636	9.55694e-05	4.85215e-05	3.7359e-05	0.000154557	2.69542e-05	0.000213764	9.91989e-05	0.000202179	0.000349538	0.00016037	6.10385e-05	3.21548e-05	2.72414e-05	3.27931e-05	0.00014236	3.74675e-05	2.8358e-05	2.6588e-05	3.34373e-05	3.4656e-05	8.69768e-05	4.05132e-05	0	0.000361131	5.41422e-05	0.000545837	0.000138374	5.57416e-05	3.03002e-05	0.000314201	7.5295e-05	3.20271e-05	4.78715e-05	9.27219e-05	1.86611e-05	2.27594e-05	2.7164e-05	3.0447e-05	6.91496e-05
GTTCG	0.000515766	0.000380945	0.000786772	0.000514313	0.000431415	0.000888053	0.000767881	0.000331574	0.000300171	0.000271353	0.00075925	0.00058937	0.000788872	0.000582826	0.000797336	0.000306028	0.00103637	0.00150877	0.000660222	0.000507292	0.000256501	0.000151988	0.000274813	0.000296729	0.000832837	0.000292235	0.000399394	0.000393857	0.000298853	0.000187209	0.00070978	0.000780099	0.000331758	0.000492511	0.0010573	0.000257893	0.000736397	0.000931941	0.00150772	0.0012187	0.00121715	0.0011695	0.000651186	6.62291e-05	4.75697e-05	0.000135449	9.63376e-05	0.000139348	6.78858e-05
CCAAC	0.00073769	0.00198533	0.00238401	0.00374699	0.00344027	0.000980007	0.00132603	0.00227578	0.00274356	0.00305086	0.00189274	0.00119886	0.00194744	0.00089058	0.00263649	0.00319544	0.00416128	0.00129615	0.00283675	0.0033047	0.0014247	0.00158419	0.00229699	0.0019092	0.00203237	0.00178604	0.000284715	0.00164061	0.00253361	0.00306646	0.0017688	0.00041442	4.73696e-05	0.00187586	0.00257998	0.00139291	0.00187514	0.00159298	0.000605994	0.00288914	0.0023738	0.00170158	0.00434723	0.00109748	0.000161764	0.00326803	0.000397402	0.00099282	8.35277e-05
CTAGT	8.95675e-05	0.000231421	0.00066422	0.000987153	0.000515876	0.000532677	0.000274681	0.000391021	0.000380653	0.000203946	0.000304653	0.000205501	0.000355676	0.000194422	0.000552678	0.000291482	0.000284035	0.000168468	0.000420863	9.63521e-05	0.000275723	0.00104255	0.000462536	0.000287216	0.000180048	0.000887035	0.000305898	0.00123939	0.00118806	0.000955335	0.00041848	0.00938258	8.90592e-05	0.000290071	0.000338706	0.000774403	0.000371377	0.000773611	0.000301286	0.000269441	0.00043537	0.000776722	0.000153773	9.37926e-05	7.63163e-05	3.15941e-05	0.000297064	8.31596e-05	8.87925e-05
CTCGC	0.0012595	0.00256407	0.00112479	0.0020312	0.0016674	0.00131622	0.00178438	0.00171266	0.00118184	0.00150488	0.0020451	0.00195243	0.00157677	0.00131931	0.0014109	0.0017317	0.00152504	0.00130831	0.00146995	0.0213271	0.00225194	0.00220904	0.00155117	0.00229901	0.000805066	0.00152759	0.00187307	0.00191135	0.00160022	0.00152486	0.00104124	0.00173432	0.00160241	0.00116417	0.00116192	0.00155445	0.00094188	0.00156629	0.00101561	0.000904649	0.00127077	0.00148606	0.000160015	0.000557741	0.000371059	0.0161082	0.00263791	0.000564604	0.00106006
GAAAT	0.000839883	0.010082	0.00120927	0.000706274	0.000967276	0.00123482	0.00126298	0.000874842	0.000877555	0.000878032	0.00115772	0.00110561	0.00106079	0.001281	0.00133949	0.000471165	0.00129365	0.00172298	0.00124005	0.00140874	0.00109127	0.000297967	0.000392395	0.00128427	0.00114656	0.000793683	0.000840084	0.000439414	0.000473737	0.000761199	0.00077002	0.000935891	0.00109873	0.000855467	0.0012231	0.000652208	0.000995464	0.00106643	0.00172209	0.00130772	0.00151729	0.00152619	0.00070003	0.000295712	0.000107093	3.27468e-05	2.23435e-05	0.0055764	0.00338451
ATAGA	0.00108401	0.00168581	0.00145853	0.00217212	0.0019702	0.0013849	0.00105484	0.00183564	0.00109231	0.00125881	0.00241099	0.00153282	0.00156177	0.00146316	0.00193039	0.00192443	0.00201955	0.00139031	0.0112127	0.00209375	0.0113711	0.00161916	0.00105367	0.00175263	0.00146157	0.00211498	0.00223964	0.00144772	0.00153529	0.00183184	0.0015188	0.00163952	0.00194286	0.000715854	0.00258953	0.00143181	0.00174548	0.00183127	0.00124835	0.00158664	0.00178421	0.00235024	0.00064777	0.000451513	0.000115701	0.000184851	0.00201355	0.000300925	0.000264883
GATAG	0.000461471	0.00107058	0.000439334	0.000312656	0.000220004	0.000369111	0.000441811	0.000899859	0.000806472	0.000681918	0.000315068	0.00068595	0.000377298	0.0015546	0.000812259	0.000224382	0.000417386	0.00128594	0.0199292	0.000447779	0.000821437	0.000326478	0.000314937	0.000992696	0.000594863	0.000781602	0.00122249	0.000204287	0.000373762	0.00116428	0.000518592	0.000447243	0.000989728	0.000413034	0.000282026	0.000356351	0.000986228	0.000302526	0.000381129	0.000469436	0.000693303	0.00118656	7.44581e-05	0.00012799	2.57625e-05	0.000619408	2.68475e-05	0.000107052	1.81085e-05
CATCT	7.79171e-05	0.000265681	0.000118378	0.000459528	0.000190581	0.000265619	0.000186165	0.000122258	0.00034141	0.000377353	0.00020804	0.000115048	0.000184494	0.000179752	0.000114362	8.43216e-05	0.000161289	0.000143186	0	0.000195507	0.00050016	0.000702109	0.000188039	0.000572165	0.000276066	0.000195613	0.000330204	8.03093e-05	0.000232567	0.000151797	7.60923e-05	1.02658e-05	2.43889e-05	0.000116847	4.97698e-05	0.00018198	0.000238038	0.000227739	0.000208589	0.000253913	4.68485e-05	0.00015298	5.44422e-05	0.000128946	1.20083e-05	0.000168123	1.62333e-05	0.000125339	4.28469e-05
TAGTC	0.000327199	0.000362949	0.00088198	0.00126387	0.000826872	0.000739672	0.000585898	0.000596697	0.000603327	0.000355858	0.000475713	0.000285002	0.000829186	0.000608605	0.000945641	0.000231969	0.000441676	0.000484317	0.00049997	0.000208739	0.000471765	0.00111356	0.000548752	0.000623435	0.000709016	0.00113736	0.000928348	0.00135172	0.00135376	0.0010423	0.000753091	0.000722126	0.000761805	0.000762201	0.000457789	0.00087684	0.00154268	0.000851783	0.000443958	0.000687172	0.000632812	0.0014908	0.000118598	0.000307176	7.61865e-05	0.000124211	0.000320618	0.000106751	9.52229e-05
TTAGT	0.000620789	0.000796981	0.00155692	0.00218874	0.00184894	0.00087162	0.000724643	0.00139431	0.00147937	0.000720615	0.00114432	0.000824608	0.00123284	0.000971854	0.00170331	0.000839743	0.00106969	0.000604391	0.00121643	0.00136368	0.000784768	0.00153981	0.00118995	0.000863635	0.000493725	0.00136029	0.000907901	0.00100803	0.0023443	0.0023955	0.000844473	0.00108178	0.00076461	0.000374648	0.00207616	0.0016649	0.00131223	0.00130111	0.000616324	0.0006529	0.00184692	0.00195724	0.00024466	0.00104576	0.000214473	0.000105975	0.000686104	0.000143308	0.000138766
CTTAG	0.000613666	0.000461694	0.000320187	0.000357433	0.000373082	0.000303619	0.000461674	0.000466101	0.00027	0.0009061	0.000457567	0.000712126	0.000342542	0.000511881	0.000428327	0.000341152	0.000185516	0.000174928	0.000196438	0.0010576	0.000685242	0.000192341	0.000186837	0.000985401	0.000580746	0.00041147	0.000729524	0.000140756	0.000202212	7.16885e-05	0.000293359	0.000310635	0.000822662	0.000984863	0.000287168	0.000282714	0.00091725	0.000194293	0.000374979	0.000354041	0.000164334	9.42545e-05	7.13803e-05	0.000152819	0.000463818	4.23079e-05	0.000137947	0.000418838	0.000311843
TAGGC	0.000103632	0.000154827	0.000203475	6.64184e-05	0.000168757	6.01929e-05	6.9995e-05	9.93273e-05	9.5195e-05	7.18757e-05	5.88753e-05	0.000249212	6.69405e-05	0.000227762	0.000252498	4.89018e-05	3.16787e-05	0.00063881	0.000266368	0.000126168	0.00014629	0.000171267	0.000316305	0.000166035	0.000846811	0.000103349	0.000126258	0.000333367	0.000124002	0.000566339	0.000277263	7.11237e-05	3.7301e-05	0.0005311	5.86217e-05	9.58089e-05	0.000267383	4.07927e-05	0.000153043	0.000503862	0.000130095	0.000249754	7.41987e-05	0.000102732	9.25191e-05	5.61167e-06	6.5479e-05	5.44162e-05	5.83504e-05
TCTAC	0.000776312	0.000348571	0.000668678	0.000494154	0.000452911	0.0005935	0.000565359	0.000327499	0.000460464	0.000406653	0.000428089	0.000574391	0.000481399	0.000832765	0.000773551	0.0199356	0.000841507	0.0014261	0.000331197	0.000726291	0.000771201	0.000139167	0.000341652	0.000694007	0.000265815	0.000481126	0.00105731	0.000264727	0.000402346	0.000205338	0.000429056	0.000737092	0.000312454	0.00956343	0.000544971	0.000157848	0.000306583	0.000581314	0.000961055	0.000725745	0.000928013	0.000355982	0.000607123	0.000175877	4.91915e-05	6.26654e-05	0.000129802	0.000168969	0.000136663
GTCTC	0.000499248	0.000256448	0.000625451	0.000497105	0.000343791	0.000567665	0.000780435	0.000252556	0.000373215	0.00021504	0.000318003	0.000527248	0.000540359	0.000588885	0.00100732	0.00026817	0.000568291	0.00142555	0.000423107	0.000734051	0.00077022	0.000181614	0.000264233	0.000489486	0.000837047	0.000625399	0.000588711	0.000541561	0.000245385	0.000379895	0.000468841	0.000709344	0.000237421	0.000748422	0.000632906	0.00012859	0.000571502	0.000404848	0.000888396	0.00118682	0.000959697	0.000470316	0.000632927	0.000286233	3.00315e-05	3.6715e-05	2.1773e-05	0.000187668	2.937e-05
CAACT	0.000792968	0.00124642	0.00141634	0.00191827	0.00205573	0.00049751	0.000728807	0.00138062	0.00178406	0.00188153	0.00157876	0.00103965	0.0011116	0.000634548	0.00180191	0.00182554	0.00236137	0.000664045	0.00191562	0.00203232	0.000821309	0.000892769	0.00204584	0.0012348	0.00151445	0.00108944	0.000246705	0.000950704	0.00159516	0.00208489	0.00102568	0.000206349	8.2603e-05	0.00100467	0.00200589	0.00110023	0.00144471	0.00099328	0.000439186	0.00178132	0.00184278	0.00131679	0.00176076	0.000787089	0.000137426	0.000110411	0.000460971	0.000553655	7.08378e-05
CCGGA	0.000779323	0.0010399	0.000899683	0.00119619	0.00125256	0.000187694	0.000212872	0.0011259	0.000845181	0.000787823	0.00122583	0.00170989	0.0010841	0.000849998	0.00117366	0.00192444	0.00105567	0.00101063	0.00116036	0.00167619	0.000768942	0.000625467	0.000892236	0.000675403	0.000895524	0.00102477	0.000968475	0.000245988	0.00116735	0.00197861	0.000755021	0.000746545	0.00110096	0.000679732	0.000689465	0.000935425	0.00061889	0.000713574	0.000325271	0.00133272	0.00149805	0.00105529	0.000595967	0.00101627	4.78454e-05	0.000109747	0.0018827	0.000150569	0.000219916
GCTGT	0.000272503	0.000115978	0.000361732	0.00188761	0.000351595	0.000820465	0.000370369	0.00146514	0.000168798	0.00107724	0.00109577	0.000219781	0.00038952	0.000209167	5.52105e-05	0.000347324	0.000709222	0.000325104	0.00207123	0.000313634	0.000749685	0.000450191	0.000978788	0.000983047	8.038e-05	0.000757831	0.000252069	0.000909928	0.00056601	0.000777276	0.000237429	0.000284779	0.000304616	0.000308589	0.000611798	0.000465613	0.000160053	0.00106179	0.000714427	0.000513333	0.000662612	0.000964463	0.00329279	0.00112905	7.83807e-05	0.00694546	0.00137873	0.00015463	6.50414e-05
ATGCT	9.27726e-05	0.000465184	0.000550801	0.00126686	0.000358621	0.000723695	0.00176947	0.000434527	0.00104633	0.000848527	0.000869219	0.000292599	0.000791141	0.000311639	0.000571893	0.000234227	0.000621986	0.00076827	0.000858176	0.000779713	0.000580157	0.000280807	0.00115326	0.000781035	0.00193157	0.00100737	0.00202145	0.00318302	0.00122084	0.00152663	0.00104141	0.000268314	0.000544832	0.00235037	0.000858545	0.0101936	0.00217277	0.000835376	0.000494104	0.00201299	0.000846128	0.000586678	5.06316e-05	0.000533685	9.25962e-05	0.000429793	0.000674309	0.000945678	0.000130479
CGATG	0.00036296	0.00138882	0.00143722	0.00244065	0.00146271	0.00115197	0.00246531	0.000985721	0.0018598	0.00211733	0.00158201	0.000833641	0.00193156	0.000613096	0.00155738	0.00225454	0.00279316	0.000984042	0.00183246	0.00167979	0.00125936	0.000612445	0.00193211	0.00157101	0.003566	0.00187919	0.00260462	0.00372654	0.00116613	0.00125244	0.00239099	0.000548236	0.000637797	0.00290723	0.00116496	0.00107166	0.00332096	0.00147134	0.00068595	0.00347527	0.00127684	0.000701713	0.000139814	0.000931347	0.000139044	0.000834257	0.000837077	0.00133711	0.000158781
TCGAT	0.000139392	0.000142187	0.000201791	0.000997454	6.51496e-05	0.000143966	9.8085e-05	0.000745824	0.000154696	0.000295241	0.000229477	6.68928e-05	0.000232579	0.000292097	8.64361e-05	5.77713e-05	0.000185679	8.51555e-05	0.000900012	6.28412e-05	0.000326961	8.75476e-05	5.21553e-05	0.000495445	0.000942051	0.000259281	0.000217696	0.0012701	0.000328549	0.000348509	0.0196246	0.000198542	5.50425e-05	0.000559375	0.000332207	0.000106451	0.000757158	0.000298054	0.000156908	0.000568529	0.000103611	8.53711e-05	3.66643e-05	0.000482097	1.87228e-05	0.000733364	2.71936e-05	0.000372669	2.07574e-05
CACCT	0.000105042	0.000218535	0.000725286	0.000755044	0.000612563	0.000548779	0.000486824	0.0199474	0.000556756	0.000243349	0.000293788	0.000232906	0.000444828	0.0005109	0.00066805	0.000297677	0.000532558	0.000346916	0.000389123	6.5998e-05	0.000256838	0.00053638	0.000430698	0.000513681	0.000560192	0.00120024	0.000791084	0.00231677	0.00160178	0.00118624	0.000783763	0.000803273	0.000123705	0.000620113	0.000569972	0.00115615	0.00126169	0.000989635	0.000255333	0.000580747	0.000684899	0.000834238	0.000147571	0.000415196	0.000109175	0.000350454	0.000508208	0.000568077	0.000141441
CTCAG	6.23416e-05	0.000395772	0.000144368	9.09451e-05	8.06633e-05	0.000102784	0.000101521	0.000271603	0.000245566	0.000351076	0.000244369	0.000380686	0.000323627	0.000173905	0.000147521	5.8438e-05	0.000253138	6.00305e-05	0.000455304	0.000337415	0.000738573	0.000171865	0.000228365	0.000794868	0.000206127	0.000183488	0.000547532	0.000119309	0.000125469	9.17637e-05	0.000110589	0.000297325	0.000143865	0.000226167	0.000148004	4.07041e-05	0.000118613	0.000228695	0.00012552	0.000273353	0.000159957	0.000205912	6.05643e-05	0.000219971	0.000174356	6.74849e-05	1.7204e-05	9.04149e-05	7.22317e-05
ACTGA	0.000393667	0.0009058	0.000940034	0.00143809	0.00151586	0.000608786	0.000797412	0.00118256	0.00116198	0.00149432	0.00076056	0.000469471	0.00108639	0.000639798	0.00123481	0.00221078	0.00193887	0.00101211	0.00152921	0.00104463	0.000749021	0.000789188	0.000740301	0.000974687	0.00243193	0.0010587	0.000737275	0.0114928	0.000786892	0.00101596	0.00156248	0.000322397	0.00969196	0.00232779	0.000877652	0.000701855	0.00261407	0.000817212	0.000492555	0.00259232	0.000809605	0.000756526	6.4763e-05	0.000124329	0.000154464	0.0061162	0.000624836	0.000659798	9.66067e-05
GACTG	0.000554006	0.000653186	0.000698063	0.00145423	0.000424236	0.000698185	0.0018375	0.000883233	0.00101648	0.00100275	0.00117339	0.00054211	0.000805025	0.000445661	0.000756751	0.000233393	0.000854627	0.00107153	0.0012593	0.00114293	0.000771293	0.000310579	0.00137422	0.000868076	0.0019616	0.000772031	0.00195366	0.00300756	0.000670135	0.000579658	0.000973181	0.000469592	0.000727137	0.00283101	0.000876725	0.000461868	0.00221653	0.000970411	0.000584105	0.00191795	0.000927089	0.000511026	0.000257104	0.00089702	0.000193339	0.00323085	0.00103506	0.000678314	0.00020415
TTGAG	0.000119844	0.00041791	7.13093e-05	8.22048e-05	0.000235287	0.000149101	0.000100705	0.00023591	0.000144322	0.000230712	0.000133301	0.000217363	0.000221479	0.000266662	0.000231301	0.000114984	0.000111326	0.00055673	0.000148009	0.000297473	0.000244802	0.000230542	9.26252e-05	0.000279239	0.000270473	0.000109531	7.66332e-05	0.000548239	0.000185863	0.000438183	0.000162935	8.37932e-05	8.28936e-05	0.000426029	0.000277502	0.000391612	0.000302101	7.5803e-05	0.00027132	0.000256302	0.000230553	0.000534645	0.000229971	0.000166288	0.000486752	1.09002e-05	6.00717e-05	6.87877e-05	0.000320102
TTTTT	0.00189218	0.00377169	0.00461213	0.00588702	0.00483202	0.00172941	0.00220775	0.00419827	0.00585953	0.00533132	0.00400016	0.00289455	0.00460148	0.00134695	0.00586563	0.00674799	0.00746408	0.00199598	0.00584949	0.00376093	0.00257006	0.00293074	0.00457548	0.00279916	0.0142417	0.00382356	0.00980969	0.00347846	0.00499403	0.0060376	0.00404697	0.00108469	0.000240782	0.00327888	0.00587186	0.00365439	0.00486624	0.00404433	0.00119133	0.00644819	0.00679986	0.00397565	0.0046426	0.00601525	0.00140831	7.7725e-05	0.00154613	0.00206134	0.00039593
ACACC	0.000273022	0.000128062	0.00016267	0.00175432	0.000428636	0.000394337	0.000831352	0.0199998	0.000493152	0.000430167	0.000189617	0.000264776	0.00117013	0.000360646	0.000180355	0.00114349	0.000177602	0.000201458	0.000615393	0.00047654	0.000338775	6.15695e-05	8.90785e-05	0.000345549	0.000908357	0.00029014	0.000198571	0.00129832	7.80181e-05	0.000288736	0.00110074	0.000241833	6.98312e-05	0.0011416	0.000172999	0.000237043	0.000880755	0.000247721	0.0001089	0.000658564	0.000172384	0.000239013	0.000173394	0.00012839	4.26142e-05	0.000378313	0.000103332	0.000336981	0.00262021
TACAC	0.000337691	0.000853085	0.000966774	0.00183048	0.00082342	0.00108309	0.00122045	0.000910109	0.000696276	0.000544418	0.000562901	0.00058846	0.000650281	0.000721759	0.00172706	9.66278e-05	0.000311717	0.00311831	0.000605256	0.0107314	0.00072519	0.000355169	0.000204051	0.000442986	0.00112076	0.000598716	0.000811797	0.0018984	0.000661259	0.000810513	0.000962769	0.00110079	0.000337272	0.00149552	0.00141948	0.00065387	0.00102007	0.000828543	0.00169765	0.00150023	0.00131783	0.000827787	0.000907234	0.00013221	0.000105134	0.000787928	0.000525632	0.000380344	0.000452572
CTACA	0.000412337	0.00077933	0.00128729	0.00152769	0.00114122	0.00113232	0.000952433	0.000687158	0.000778011	0.000576869	0.000670107	0.000498574	0.000580746	0.000987712	0.00135855	0.00035984	0.000726192	0.00159731	0.000892718	0.000569654	0.0011839	0.00133286	0.000673933	0.00104459	0.00103194	0.0011892	0.000902307	0.0015369	0.00152836	0.0010899	0.00114275	0.00135547	0.000262857	0.000719482	0.00131563	0.00097404	0.000899545	0.00127061	0.00127076	0.00121961	0.00113158	0.00130952	0.000586913	5.20793e-05	0.000147109	3.73928e-05	0.000475021	0.000214024	0.000485422
ATGCC	0.000232362	0.00117398	0.0032117	0.0040746	0.0023326	0.00173153	0.00178892	0.00267556	0.00324083	0.00201413	0.0015352	0.000810912	0.00246631	0.00231083	0.00256952	0.00146399	0.00144682	0.00231599	0.00298698	0.000494431	0.00109359	0.00438022	0.00353591	0.00143323	0.00241434	0.00279287	0.00145934	0.00511654	0.00405122	0.00457035	0.00194512	0.00175058	0.000363649	0.00320199	0.00175531	0.00207649	0.00397601	0.0026246	0.00120766	0.00313886	0.00170376	0.00290934	0.00335787	0.0011007	0.000774728	0.00959274	0.000773831	0.000501585	0.000515465
AATGC	0.00012986	0.000362828	0.00132388	0.00132515	0.000994239	0.000786894	0.000781548	0.000595307	0.00121607	0.00132221	0.000759952	0.000751764	0.00113391	0.000573732	0.000747431	0.000558808	0.00104408	0.000654683	0.00107334	0.000930965	0.000661549	0.0011604	0.000933216	0.000923506	0.00156127	0.00114628	0.000556388	0.00196368	0.00153798	0.00129054	0.00102036	0.000896972	0.00016122	0.00226016	0.000900402	0.0107851	0.00181743	0.00138549	0.000829876	0.00131674	0.000898761	0.00101901	0.000137629	0.000602043	0.000279211	7.04617e-05	0.00030369	0.000490479	5.50387e-05
CGATT	0.000542363	0.000822369	0.000459994	0.00044598	0.0105401	0.000168521	0.0100076	0.000837972	0.000329315	0.000570353	0.000987595	0.000908063	0.0197203	0.000787072	0.0104531	0.00148347	0.000982413	0.000958837	0.000603541	0.00135177	0.000590804	0.000447005	0.000410487	0.0104123	0.000695604	0.00127504	0.00127185	0.000485714	0.000335359	0.0105578	0.0104505	0.000866144	0.00107481	0.000349015	0.00948438	0.000485531	0.000514593	0.000493292	0.000403736	0.00086838	0.000540677	0.000631783	0.000477374	0.000251396	3.10014e-05	0.000724232	0.00176526	0.000172922	0.000188071
CCGAT	0.000489001	0.00101631	0.000761159	0.0015999	0.0009736	0.000735592	0.00166445	0.00106453	0.00108825	0.00118771	0.00182583	0.00122393	0.00137708	0.000829494	0.00120258	0.00158099	0.0013585	0.00133653	0.00120862	0.00183754	0.00139009	0.000425406	0.00150161	0.00139354	0.00218273	0.00163161	0.00297754	0.00245875	0.000612602	0.00127586	0.0015717	0.00089664	0.00154057	0.00262462	0.00101647	0.000717566	0.00227217	0.00110476	0.000678397	0.00227902	0.00110582	0.000680612	0.0004944	0.000679237	0.000124917	0.000456379	0.00242901	0.000689843	0.000308404
TTCTA	0.000952035	0.0011992	0.000535192	0.000730926	0.0015776	0.000291331	0.000278057	0.00111989	0.000505088	0.000834032	0.00140764	0.00153032	0.000881152	0.00114647	0.00113928	0.0119309	0.00107035	0.0011573	0.000923297	0.00208102	0.0011429	0.000480237	0.000463104	0.00103909	0.00090945	0.00105226	0.00122095	0.000278239	0.000160554	0.00155332	0.0008867	0.00110103	0.00190183	0.00032529	0.000501403	0.000699651	0.000648407	0.000589538	0.000320893	0.000678657	0.000592292	0.00034667	0.000761273	0.000437395	2.94855e-05	0.000314981	0.00334086	0.000153147	0.000331605
TCAAA	0.000124124	0.000692545	0.000614032	0.000306388	0.000378853	0.000178759	0.000572396	0.000788261	0.000588355	0.000753443	0.000563722	0.000758303	0.0013691	0.000758512	0.00150177	0.000484419	0.000419577	0.00117626	0.000246627	0.000702974	0.000641303	0.00143878	0.00144906	0.00055109	0.000712289	0.00016579	0.000259819	0.000991684	0.00107246	0.00162069	0.000499604	0.000488185	0.00018168	0.000827861	0.000710975	0.00076425	0.000793033	0.000236186	0.000322973	0.000936218	0.000393979	0.000880559	0.00222695	0.00050546	0.000498186	0.000444451	0.000290809	0.00017163	0.000390889
TATCG	0.000147185	0.000442858	0.000235623	0.00107843	0.000308235	0.000237016	0.000330481	0.00114482	0.000301324	0.000900645	0.000410811	0.000265786	0.000388505	0.000329065	0.000509135	0.00035345	0.000332145	0.00017587	0.0201697	0.000704145	0.00139183	0.00028919	0.000198428	0.0112747	0.00034365	0.000258493	0.000405941	0.000330523	0.000248298	0.000371401	0.000413737	0.000280603	0.000146884	0.000479596	0.00990381	0.000673295	0.000293667	0.000247178	0.000247723	0.000323516	0.000113205	4.86933e-05	0.000147715	0.000525541	0.000103071	0.000238905	5.92822e-05	0.000367501	0.000318313
GCTAT	7.72628e-05	0.00035526	0.000126115	0.000108817	0.000112945	0.000102127	0.000209885	0.000254975	0.000228649	0.000205527	0.000145667	0.000215561	0.000104857	0.000435354	0.00036757	0.000118333	9.66782e-05	0.000729693	0.000584924	0.000131942	0.00016625	0.000459568	0.000325057	0.000329945	0.000204211	9.31281e-05	1.38675e-05	0.000703257	0.000601211	0.00127009	6.26646e-05	5.25953e-05	5.62752e-05	0.000411419	0.000362262	0.000284366	0.000169147	5.93416e-05	0.000193194	0.000378745	4.32373e-05	0.000230005	3.32707e-05	1.06293e-05	0.00043202	2.1127e-05	1.07278e-05	6.27707e-05	0.000283048
TAATA	0.000214994	0.00108319	0.00237846	0.0124707	0.00148457	0.000941426	0.00120594	0.0118534	0.00253628	0.0114524	0.0107916	0.00090981	0.00202388	0.011698	0.00196386	0.00137484	0.00108772	0.00182033	0.00245406	0.000412571	0.0105637	0.0130227	0.012841	0.0110619	0.00087941	0.00171958	0.0101151	0.00241933	0.00280879	0.00353919	0.00122507	0.00106784	0.000252591	0.00156822	0.0110065	0.00110784	0.00146412	0.0112485	0.000734149	0.00146535	0.00124559	0.00203248	0.00351029	0.000632765	0.000551915	0.00916957	0.000302138	0.000204077	0.000426079
CTGGG	0.000104433	0.000184411	4.28664e-05	3.0823e-05	0.000334386	9.37364e-05	0.000104288	0.000446317	8.49596e-05	0.000283228	0.000394348	0.000136829	0.00018909	7.8607e-05	0.000341583	8.18892e-05	0.000294178	8.81266e-05	0.000147953	0.000255893	0.000196225	6.93504e-05	4.71105e-05	0.000127655	0.000109605	8.09269e-05	0	0.00013815	0	0.000262498	9.20401e-05	1.76002e-05	2.80308e-05	0.000101467	0.0012732	0.00028496	6.75875e-05	5.92323e-05	0.000143828	7.47388e-05	0.000218404	0.000187415	9.09682e-05	0.000488558	6.66657e-05	8.75881e-05	0.000161031	0.000116342	3.61891e-05
CCGTT	0.000356239	0.000340771	0.00019438	9.19546e-05	0.000212822	0.000176036	0.00015955	0.000246039	0.000330507	0.000532088	0.000323106	0.000215967	0.000246399	0.000530167	0.000117207	0.000271017	0.000163266	0.000226877	0.000222849	0.000576638	0.00047645	2.71441e-05	0.000204192	0.000533371	0.000566555	0.000169486	0.000437088	0.000471434	8.74343e-05	5.03014e-05	0.000870121	0.000294988	9.73233e-05	0.000769752	0.000128187	7.10475e-05	0.000291966	0.000174689	0.000184859	0.000365829	0.000122502	0.000156791	7.47757e-05	9.33364e-05	6.94403e-05	6.12223e-05	8.07851e-05	0.000501569	0.00260704
ATCTC	6.28279e-05	0.000227468	0.000378751	0.000177248	0.000225696	0.000257376	0.000276509	4.29181e-05	0.000255152	0.00027735	0.000127822	0.00986966	0.00017081	0.000551509	0.00020838	0	0.000178907	5.93621e-05	1.25001e-05	0.000191835	0.000565925	0.00017911	0.000118075	0.000644653	0.000119648	0.000472316	0.000557822	4.93645e-05	0.000111386	1.76835e-05	4.6006e-05	0.00021573	0.000417435	0.000126322	8.90523e-05	4.77352e-05	0.000156216	0.000166563	9.96776e-05	0.000162299	0.000123366	0.000102132	0.0012411	0.000380918	0.00116499	7.07951e-05	0.000244959	0.000162787	1.05547e-05
GTTCC	0.000234656	0.000442624	0.000773699	0.000672108	0.000663165	0.000463409	0.000456374	0.000861282	0.000716231	0.000462471	0.000330974	0.000415343	0.00069134	0.000674387	0.000946572	0.000471962	0.000491632	0.000977248	0.000464875	0.000329342	0.000768792	0.000517476	0.00142846	0.000694199	0.00110138	0.000494227	0.000215842	0.000848682	0.00083056	0.00128343	0.000725917	0.000306488	0.000341027	0.000668577	0.00102933	0.00060535	0.00100133	0.000335033	0.000806863	0.000804241	0.00080073	0.00108962	0.000196605	0.00025113	0.000499291	0.000190514	0.000175779	0.000186811	0.000504892
AAATG	0.000607014	0.00132972	0.00211453	0.00214134	0.00182773	0.00118193	0.00103354	0.00133832	0.00232064	0.00197916	0.00102323	0.0012882	0.00176517	0.00081775	0.00162447	0.00164598	0.00258054	0.000897307	0.00209501	0.00219038	0.00108694	0.00168013	0.00156406	0.00158556	0.00166063	0.00205375	0.00133503	0.00162839	0.00164996	0.00161014	0.00188703	0.00131902	0.0004802	0.00181985	0.000973291	0.00147953	0.00215656	0.00221421	0.000842289	0.00175026	0.00140568	0.00119005	0.000193424	0.000791605	0.000174839	0.000158442	0.000242081	0.000657845	5.46282e-05
CCTAG	9.29956e-05	0.00042349	0.000617577	0.000649112	0.000464039	0.000669039	0.000415937	0.000432425	0.000316616	0.000296897	0.000211145	0.000428399	0.000532512	0.000216422	0.000591561	0.000567048	0.000498298	0.000178072	0.000450587	0.000419841	0.000279879	0.000427029	0.000464045	0.000341273	0.000234411	0.00123636	0.00110232	0.00100367	0.000989378	0.000843031	0.000474801	0.000754044	0.000265302	0.000334662	0.000267888	0.000753192	0.000464589	0.000684445	0.000333189	0.000211356	0.000402725	0.000676256	8.62573e-05	0.000265788	3.6753e-05	0.000544283	0.000264242	0.000141578	5.83899e-05
AACGT	0.000130705	0.00115896	0.00138814	0.00213087	0.00143658	0.000916753	0.000742162	0.00118423	0.00120612	0.00110612	0.000856881	0.000732447	0.00099234	0.000897739	0.0017363	0.00160009	0.00190352	0.00123759	0.00179964	0.00050957	0.000578148	0.00192646	0.00137544	0.000976889	0.00138865	0.00156564	0.000453026	0.00216656	0.00226055	0.00262415	0.0010607	0.00100181	0.000784268	0.000887083	0.000961436	0.00124744	0.00123649	0.00127317	0.000629781	0.00131005	0.00126363	0.00169311	0.00174292	0.000392486	0.000605139	0.00893845	0.000280971	0.00030288	0.000390031
GCCCG	4.00399e-05	1.3062e-05	0.000138177	6.33339e-05	0.000113608	8.69883e-05	6.63944e-05	4.90857e-05	2.50271e-05	0.000344398	0.000144775	0.000104275	0.000157267	6.00016e-05	5.53705e-05	3.92118e-05	3.16824e-05	9.93279e-05	0.000134969	0.000523078	0.00037012	2.1226e-05	8.90348e-05	0.000415594	0.000165382	0.000204736	0.000111337	0.000103051	3.19576e-05	1.74155e-05	0.000118431	0.00012315	2.76244e-05	0.000463031	7.52962e-05	9.61862e-06	0.000241601	4.3783e-05	0.000224257	8.80857e-05	6.53147e-05	5.90796e-05	2.21742e-05	6.2289e-05	0.000132502	0.000278478	2.89529e-05	0.000263102	0.000108184
ATTAT	0.000343896	0.000816281	0.000651827	0.00113928	0.000795551	0.000355566	0.000796249	0.000936887	0.00055087	0.00091692	0.000606824	0.00070154	0.00137937	0.000802592	0.000845193	0.00103786	0.00119216	0.000479863	0.000422764	0.00127106	0.0010157	0.0101827	0.000403402	0.00101362	0.00062854	0.00101546	0.00125666	0.000481003	0.000415448	0.000458688	0.000287201	0.000394461	0.000715304	0.000984816	0.000425977	0.00087624	0.000449314	0.000326343	0.000280229	0.000457092	0.000243975	0.000376832	0.000435665	0.000440618	2.44695e-05	1.57918e-05	0.000158315	0.000141352	0.000116424
CATTA	0.000296835	0.000765507	0.000597966	0.00122436	0.000737884	0.0102359	0.00109561	0.000848106	0.000819599	0.0205174	0.000523968	0.000746197	0.00114908	0.0103559	0.000566248	0.00118398	0.0108076	0.00045336	0.000617761	0.0012868	0.00074488	0.000406583	0.000391602	0.000833601	0.00113087	0.0114298	0.00184331	0.000878569	0.000637179	0.000738818	0.000777687	0.000452448	0.000887902	0.0110053	0.000477236	0.0102273	0.000611599	0.000660354	0.00977504	0.0104158	0.000663954	0.000578693	0.000118233	0.000790229	0.000234475	2.98606e-05	0.000153538	0.000135835	7.67923e-05
TCGCG	0.000376413	0.00143962	0.000441319	0.00107132	0.000422618	0.000689942	0.0116013	0.000403514	0.00113965	0.000903937	0.00107816	0.00046191	0.0197817	0.000365738	0.000729105	0.000304128	0.00104516	0.000640092	0.0200291	0.0204441	0.00115408	0.019513	0.00114943	0.0210322	0.00115231	0.0008797	0.00185929	0.00111265	0.000446969	0.000677048	0.000446556	0.000255727	0.000497143	0.00119251	0.000799447	0.000384339	0.000667715	0.000817532	0.000677581	0.00134537	0.00084261	0.000582605	0.000114534	0.000572059	9.12598e-05	6.90402e-05	0.000935604	0.000519579	0.000620919
AGTCG	0.000253841	0.000510947	0.00053494	0.0010743	0.000461007	0.000601096	0.00150185	0.000404517	0.000875001	0.000813177	0.00103381	0.000394215	0.000624913	0.000353772	0.000628768	0.000219759	0.000746138	0.000606439	0.000815455	0.000857168	0.000923993	7.36489e-05	0.00115642	0.00103553	0.00103443	0.000710264	0.00182615	0.00096605	0.000445911	0.000444997	0.000488276	0.000281567	0.000520237	0.00118593	0.000704777	0.000280068	0.000742681	0.000784902	0.000463347	0.00111838	0.000794165	0.000500595	8.53572e-05	0.000639205	7.19022e-05	0.000143182	0.000448616	0.000489206	0.000145454
[truncated: 3,496 more rows]
[truncated: 140 more columns]
