# Supplementary material for: Motif-Based Text Mining of Microbial Metagenome Redundancy Profiling Data for Disease Classification
Source: Biomed Res Int. 2016 Feb 14;2016:6598307. doi: 10.1155/2016/6598307 (PMC4769744; doi:10.1155/2016/6598307)
Supplement: Supplementary file 1 — File S1 and S2: k-mer counting results of pneumonia and dental caries data. In File S1, 0 indicates normal sample, 1 indicates CAP and 2 indicates HAP in the last raw. In File S2, 1 indicates dental plaques patient, 2 indicates dental decay control sample, 3 indicates saliva patient, and 4 indicates saliva control sample in the last raw. File S3: Other Supplementary Materials. Figure S1 Learning curves of motif finding step of PMF algorithm for dental plaques samples with SVM (a) and saliva samples with NNA (b). Table S1: Microbiota signatures (“KCTCWT”) in 3-class problem in pneumonia samples. Table S2: Microbiota signatures (“WTCGTC”) in 2-class problem in pneumonia samples. Table S3: Classification results of dental decay data from decay plaques samples. Table S4: Classification results of dental decay data from saliva samples. [file 6598307.f1.zip › supplemental file/File_S2_dental_caries_data.xls]

## Sheet: quchi66
CGTAGG	0.0101628	0.0104171	0.0102806	0.0100862	0.0106009	0.0102679	0.010646	0.0101504	0.0106408	0.0102584	0.0102594	0.0102774	0.01032	0.0104227	0.0102197	0.0101164	0.0103223	0.0104713	0.0103433	0.010273	0.0105342	0.0102466	0.0107048	0.0101782	0.0104637	0.0103717	0.0104014	0.0103742	0.0109868	0.0101983	0.0106205	0.0102265	0.0103558	0.0103636	0.010218	0.0104931	0.0108872	0.0103071	0.00999971	0.010309	0.0103517	0.0103688	0.0108404	0.0103205	0.0103018	0.0102996	0.0110142	0.0104559	0.0106374
CCGTAG	0.0102576	0.0104076	0.0106248	0.0101495	0.0105193	0.0102985	0.0106269	0.0102759	0.0103006	0.0103212	0.0103309	0.0103339	0.0103704	0.0104535	0.0102599	0.0102121	0.0103521	0.0104483	0.0103423	0.0103157	0.0105469	0.0103308	0.0106221	0.0102383	0.0105889	0.0103672	0.0104389	0.0103855	0.0110147	0.0102597	0.0105372	0.010198	0.0103802	0.0104349	0.0102972	0.0105275	0.0108393	0.0103542	0.0099982	0.0103767	0.0103272	0.0104195	0.0108329	0.0103083	0.010247	0.0103444	0.0110647	0.0104695	0.010563
CCCGTA	0.0102669	0.0105375	0.0111469	0.0107376	0.0106469	0.0101055	0.01082	0.0107841	0.0106177	0.010778	0.0104421	0.0103651	0.0104185	0.0104561	0.010736	0.0105283	0.0105013	0.0124251	0.0104393	0.0110242	0.0111966	0.0107003	0.011224	0.010516	0.0106822	0.0107493	0.0103409	0.0105036	0.0107834	0.0102795	0.0103818	0.0100923	0.0103023	0.0106966	0.0103391	0.0105963	0.0114019	0.0113599	0.0113586	0.0105604	0.0108264	0.0113455	0.0106491	0.010255	0.0103097	0.0107387	0.0106632	0.0108332	0.0105272
TCCCGT	0.0100283	0.0104273	0.0110172	0.0108019	0.0105508	0.0101545	0.0106226	0.0106035	0.0106854	0.010754	0.0102238	0.0103715	0.0104311	0.010198	0.0107896	0.0102788	0.0102141	0.0124257	0.0102764	0.0109651	0.0111418	0.0104404	0.0111496	0.0103665	0.0106333	0.0107351	0.0101975	0.0102455	0.0107891	0.0102511	0.0103617	0.00979666	0.0102092	0.0104801	0.0101114	0.0106626	0.0114192	0.0113256	0.0110967	0.0103454	0.0108835	0.0113741	0.0105326	0.0102218	0.0103036	0.0107386	0.0107241	0.0108849	0.0105679
CTCCCG	0.00992645	0.00993902	0.0104212	0.010172	0.0102775	0.0101619	0.0103542	0.0100003	0.0105369	0.0101726	0.0100312	0.0101039	0.0103154	0.0101059	0.0102505	0.00979843	0.0100067	0.0104049	0.0101614	0.0102122	0.0104037	0.010046	0.0105287	0.0099113	0.0104708	0.0104209	0.0103105	0.0102148	0.0105526	0.0100073	0.0103818	0.00976091	0.0103357	0.010272	0.00999904	0.0106299	0.0104922	0.0102435	0.00996505	0.0102427	0.0102822	0.010188	0.0103656	0.0101584	0.0100695	0.0102722	0.0105327	0.0103686	0.0105307
CCTCCC	0.010333	0.0101033	0.0106938	0.0103537	0.0104779	0.0103292	0.0104685	0.0101288	0.0106435	0.0102732	0.0103445	0.0102284	0.0105052	0.0104475	0.0103795	0.0103051	0.0103527	0.0104624	0.0104245	0.0103832	0.0104791	0.0102643	0.0106609	0.0100595	0.0106393	0.0105616	0.010518	0.0103144	0.0110017	0.0101553	0.0103343	0.00999737	0.0105229	0.0104974	0.0102908	0.0106342	0.0109052	0.0102218	0.0104172	0.0103416	0.0103563	0.010336	0.0113174	0.0103675	0.0100516	0.0105688	0.0106185	0.0106586	0.0106883
GCCTCC	0.0112918	0.0103664	0.0114934	0.0104455	0.0113958	0.0105543	0.0120426	0.0103844	0.0114179	0.0104713	0.0108369	0.0104317	0.0127958	0.0106497	0.010722	0.0104008	0.0109485	0.0105097	0.0105249	0.0104531	0.0107103	0.0103644	0.0108665	0.0103979	0.0107707	0.0106769	0.0104836	0.0103893	0.0106502	0.010236	0.012132	0.0101157	0.0114912	0.0105351	0.0107318	0.010533	0.0109567	0.010269	0.0107701	0.0104311	0.010486	0.0106089	0.0108333	0.0103689	0.0102214	0.0104324	0.0109448	0.0106833	0.010871
TGCCTC	0.0103987	0.0104111	0.0108521	0.0103719	0.0108135	0.0104922	0.0116993	0.0103741	0.010985	0.0104347	0.0104476	0.0104148	0.0108273	0.0106053	0.0105998	0.0104008	0.010556	0.0104585	0.0104423	0.0104531	0.0105256	0.0103648	0.0106543	0.0102887	0.0106106	0.0106046	0.0104912	0.0103976	0.0107427	0.0101801	0.011258	0.0101155	0.0108215	0.0105299	0.0103912	0.010533	0.0109315	0.0103313	0.0104418	0.0104177	0.0104867	0.0105358	0.010771	0.0103362	0.0102622	0.010438	0.0107563	0.0106503	0.0108718
CTGCCT	0.0103915	0.0103459	0.0108005	0.0104076	0.0108246	0.0104932	0.0116966	0.0103691	0.010985	0.0104385	0.0104693	0.0104485	0.0108109	0.010622	0.010609	0.0103697	0.0104405	0.01049	0.0104584	0.0104519	0.010493	0.0103832	0.0106548	0.0101573	0.0106011	0.0105466	0.0105215	0.0103762	0.0106502	0.0100799	0.01123	0.0101155	0.0108215	0.0105394	0.0103844	0.010533	0.0108373	0.0102774	0.0104299	0.0104178	0.0104431	0.0105191	0.0107579	0.010255	0.0102075	0.0104593	0.0107321	0.0105963	0.0109065
GCTGCC	0.0103898	0.0103175	0.0107021	0.010346	0.0105917	0.0104751	0.0105424	0.0104431	0.0106034	0.0105089	0.0104468	0.0105054	0.0105944	0.0106194	0.0104149	0.0104346	0.0104393	0.0105579	0.0104583	0.0104526	0.0105758	0.0104518	0.0106806	0.0101111	0.0105875	0.0105152	0.0104917	0.0104144	0.0107519	0.0101067	0.0103528	0.010192	0.0106198	0.0105677	0.0104937	0.0105654	0.0109046	0.0103553	0.0103935	0.0104781	0.0104683	0.010536	0.0108336	0.0102775	0.0102741	0.0104644	0.0106737	0.0106295	0.0106524
TGCTGC	0.0104365	0.0104399	0.0109472	0.0103423	0.0108298	0.0105683	0.0107263	0.0106597	0.0107142	0.010643	0.0106981	0.0104962	0.0106597	0.0108788	0.0104852	0.0105907	0.0103243	0.0107475	0.0104746	0.0105147	0.0106136	0.0106816	0.0109287	0.0102968	0.0108733	0.0105801	0.0106954	0.0107784	0.0107981	0.0104229	0.0105807	0.0102445	0.0111148	0.0106469	0.0106923	0.01065	0.0110378	0.0104638	0.0104107	0.0105089	0.0105192	0.0107213	0.0111582	0.0103385	0.0103778	0.0106172	0.0106884	0.0107526	0.0107719
CTGCTG	0.0213832	0.0213949	0.0219408	0.020836	0.0221607	0.0213308	0.0223177	0.0213015	0.0227203	0.0215191	0.0218452	0.0210073	0.0221517	0.0214557	0.0214058	0.0212716	0.0208912	0.0214678	0.0212764	0.0211236	0.0223964	0.0212188	0.022634	0.0213524	0.0233407	0.0213973	0.0228007	0.0211985	0.0242527	0.0215029	0.021465	0.0205481	0.0215766	0.0215373	0.0214975	0.0214799	0.0244007	0.0210115	0.0206109	0.0210081	0.021361	0.0213343	0.0248799	0.02146	0.0209569	0.0212734	0.0236204	0.0230912	0.0234054
ACTGCT	0.0106584	0.0120577	0.0108418	0.0117622	0.0123657	0.0158459	0.011695	0.012426	0.0116836	0.0130889	0.0119547	0.0153079	0.01139	0.0148137	0.0116914	0.0136631	0.0107139	0.0130713	0.0112337	0.0122219	0.0118458	0.0153292	0.0121837	0.014262	0.0112762	0.0125684	0.0124555	0.0120393	0.0122744	0.0154989	0.0111536	0.0109617	0.0126697	0.0168049	0.0118278	0.0146457	0.0128264	0.011747	0.0102932	0.0125602	0.01159	0.01177	0.0125754	0.0147675	0.0120996	0.0115443	0.0121312	0.012059	0.0121767
TACTGC	0.00169321	0.00310523	0.00188427	0.00390166	0.00173779	0.00165356	0.00169512	0.00198084	0.00202319	0.00225718	0.00136452	0.00271135	0.00171529	0.00180611	0.00235731	0.00254473	0.00183936	0.00240993	0.00474819	0.00455102	0.00197634	0.00295956	0.00172048	0.00279349	0.00246337	0.00456732	0.00161632	0.00395744	0.00171048	0.00240241	0.00257016	0.00635727	0.00224793	0.00148826	0.00544501	0.0029555	0.00150545	0.00310509	0.00398377	0.00244557	0.00262857	0.00261383	0.00234286	0.00335793	0.00516978	0.0046227	0.00208128	0.0034068	0.00264347
CTACTG	0.00170037	0.00339248	0.00210293	0.00399011	0.00175451	0.00166089	0.00173012	0.00247127	0.00212926	0.00238035	0.00134285	0.00288414	0.00184548	0.00192776	0.00251268	0.00281801	0.00186823	0.00250137	0.00534131	0.00460202	0.00192623	0.00298264	0.00170775	0.00295834	0.00253782	0.00492288	0.00157576	0.00405725	0.00171048	0.0025164	0.00257003	0.00647316	0.00227829	0.00153871	0.00554176	0.004002	0.00179671	0.00327006	0.00403131	0.00248578	0.00264632	0.00298286	0.0023479	0.00380353	0.00543619	0.00489973	0.00206965	0.00373388	0.00271612
CCTACT	0.00167794	0.00325165	0.00200609	0.00392884	0.00174834	0.00169066	0.00169334	0.00201316	0.00209637	0.00230888	0.00127292	0.00308945	0.00173981	0.00183646	0.00244153	0.00281801	0.00183936	0.00242021	0.00476567	0.00453475	0.00192623	0.00297967	0.00174728	0.00289592	0.00247162	0.00456545	0.00157561	0.00405579	0.00171048	0.00254566	0.00260571	0.00638131	0.00205592	0.00182599	0.00544779	0.00292497	0.00155343	0.00317088	0.00396643	0.00251414	0.00263783	0.0030248	0.0023212	0.0035526	0.00521906	0.00475512	0.00206965	0.00358527	0.00275448
CCCTAC	0.00175659	0.00342666	0.00205401	0.00402625	0.00202794	0.00169614	0.00171219	0.00205277	0.00275516	0.00229647	0.00127292	0.00276494	0.00181243	0.00194843	0.00239407	0.00284978	0.0018965	0.00249277	0.00481381	0.00456927	0.00205074	0.00300042	0.00185219	0.00293369	0.0026832	0.00462304	0.00163839	0.00416974	0.00291406	0.00265654	0.00300067	0.00636852	0.00252654	0.00155474	0.00562368	0.0030582	0.00219725	0.0032823	0.0041961	0.00245902	0.0027212	0.00277937	0.00279691	0.00358421	0.00532876	0.00465977	0.00298207	0.00366647	0.00286491
TCCCTA	0.00239665	0.00488466	0.00363305	0.0044705	0.00337205	0.0077021	0.00231829	0.0036367	0.00358992	0.00401356	0.00233297	0.00588239	0.00313294	0.00479287	0.00282696	0.00598371	0.00227355	0.00350061	0.00595847	0.0074927	0.00279851	0.00450543	0.00234131	0.00497596	0.00357917	0.00631981	0.00315782	0.00502084	0.00240922	0.00880669	0.00393184	0.00701937	0.00253007	0.00439332	0.00657791	0.00776029	0.0025082	0.00488676	0.00414569	0.00425216	0.0029408	0.00358692	0.00337959	0.00694275	0.00672371	0.00573061	0.00270339	0.00435904	0.00376649
TTCCCT	0.00469434	0.00602751	0.00427126	0.00655245	0.00414829	0.00345454	0.00405614	0.00629601	0.00550421	0.00541052	0.00419164	0.00447926	0.00322107	0.00376118	0.00518002	0.0060561	0.00527291	0.00414443	0.0080099	0.00659603	0.00600405	0.00386589	0.00583209	0.00457244	0.00610476	0.00590764	0.00698336	0.00535512	0.00593638	0.00343809	0.00471836	0.00693405	0.00391988	0.00199763	0.00721629	0.00619737	0.00519553	0.00637776	0.00681677	0.00603448	0.00544322	0.00619995	0.00636819	0.0050146	0.00749456	0.0075704	0.00602068	0.00601956	0.00624104
ATTCCC	0.00980875	0.00926771	0.0102083	0.00935629	0.00865958	0.00574783	0.00982616	0.00912719	0.00935536	0.00841225	0.00899308	0.00707281	0.00971486	0.00680456	0.00942426	0.00842359	0.00987809	0.00834434	0.00935713	0.0087219	0.00954327	0.00594364	0.00927456	0.00726752	0.00992307	0.00860925	0.00892374	0.00895213	0.00934578	0.0061463	0.00942369	0.00993478	0.00839629	0.00493076	0.0092724	0.00776843	0.00906901	0.00925487	0.0101733	0.0086291	0.00946421	0.00947989	0.00908166	0.00699901	0.00918052	0.0097861	0.00957802	0.00930363	0.00862723
GATTCC	0.00386269	0.00379963	0.00191401	0.0044706	0.00267682	0.0025916	0.0038796	0.00223004	0.0027982	0.00262141	0.00350577	0.00296863	0.00367776	0.00289675	0.00305612	0.00297368	0.0028153	0.00258421	0.00528052	0.00480289	0.00230828	0.00385108	0.00244109	0.00354478	0.00328245	0.00516483	0.00163974	0.00437411	0.00179386	0.00340863	0.00352282	0.00645098	0.00307362	0.00305962	0.00627151	0.00345861	0.00229462	0.00325558	0.00468719	0.00283856	0.00313679	0.00287783	0.00316341	0.00405706	0.00532284	0.00467132	0.00244711	0.0035232	0.00328066
AGATTC	0.00385572	0.0037901	0.00191401	0.0044533	0.00268331	0.0025916	0.0038796	0.00223004	0.0027982	0.00266718	0.00350577	0.00294645	0.00365358	0.00288693	0.00304711	0.00297368	0.0028153	0.00257981	0.00528085	0.0047854	0.00230828	0.00385524	0.0024348	0.00354141	0.00327423	0.00517783	0.00163229	0.00433688	0.00179386	0.00339477	0.00353167	0.00645098	0.00307362	0.00305962	0.00626478	0.00345861	0.00228494	0.00324699	0.00467537	0.00283856	0.00312856	0.00287241	0.00316341	0.00404573	0.00532284	0.00465866	0.00244711	0.00353218	0.00324443
AAGATT	0.00385572	0.00378535	0.00191401	0.0044533	0.00268331	0.00262102	0.00389833	0.00223004	0.00280909	0.00267532	0.00350577	0.00294645	0.00365358	0.00295896	0.00307696	0.00297368	0.0028153	0.00259766	0.00531252	0.0047854	0.00230828	0.0038368	0.00242845	0.00356502	0.00329261	0.00520811	0.00163998	0.00433686	0.00179386	0.00340927	0.00354057	0.0064799	0.00307362	0.00306424	0.00626475	0.00345861	0.00228567	0.00324699	0.00465173	0.00284523	0.00312856	0.00287241	0.00316341	0.00405648	0.00531843	0.00468381	0.00244711	0.003532	0.00324443
GAAGAT	0.00383429	0.00381578	0.00188318	0.00450568	0.00269491	0.00273777	0.00394091	0.00232513	0.00279968	0.00279841	0.00348477	0.00296632	0.00351037	0.00302759	0.00313036	0.00297368	0.00278643	0.00271426	0.00546038	0.00480648	0.00238614	0.00395937	0.00258713	0.00364933	0.00335778	0.00519822	0.00169058	0.00420507	0.00205175	0.00336421	0.00373285	0.00649164	0.0030892	0.00324662	0.00627192	0.00369954	0.00241262	0.00331175	0.00467716	0.00282322	0.00311785	0.00287376	0.00324744	0.00396982	0.00537023	0.00478298	0.00247429	0.00362676	0.00324443
CGAAGA	0.00213282	0.00297936	0.00277593	0.00419652	0.00218593	0.00149554	0.00302045	0.00158245	0.00254086	0.00199445	0.00187474	0.00214468	0.00279027	0.00143989	0.00288578	0.00245671	0.00200152	0.00226461	0.00396934	0.00396773	0.00262827	0.00275665	0.00235203	0.00300295	0.00341319	0.00429288	0.00255393	0.00379433	0.00304371	0.00267332	0.0027287	0.00608992	0.002626	0.00135101	0.00499366	0.00138651	0.00311887	0.00278468	0.0035434	0.00221841	0.00260469	0.00229026	0.00387206	0.00331596	0.00437008	0.00425762	0.00409167	0.00366177	0.00445132
CCGAAG	0.00861473	0.00643592	0.00846646	0.00757857	0.00619901	0.00415191	0.00789537	0.00644963	0.0070492	0.00618296	0.00672553	0.00438793	0.0079664	0.00518712	0.00736017	0.0058242	0.0093364	0.00499002	0.0071056	0.00670186	0.00591276	0.00449764	0.00552314	0.00465814	0.00624996	0.00648843	0.00659957	0.00716708	0.00410333	0.00401471	0.00822495	0.00907002	0.00672957	0.00319439	0.00653243	0.00388905	0.0039798	0.00719136	0.00817479	0.00758391	0.00636632	0.00634188	0.00417475	0.00445632	0.00709224	0.00731739	0.00626823	0.00492975	0.00653896
GCCGAA	0.00167175	0.00235675	0.00101142	0.00353763	0.000962339	0.00130157	0.00116795	0.00124712	0.00157296	0.00167524	0.00100849	0.00198293	0.00142609	0.00129519	0.00183794	0.00207795	0.00157884	0.00199671	0.0028725	0.00370329	0.00144602	0.00265967	0.00117487	0.00248362	0.00193058	0.00378936	0.00126674	0.00359362	0.00143458	0.00223059	0.00216934	0.006026	0.000804907	0.00118221	0.00414835	0.00113862	0.00062476	0.00265458	0.00283826	0.00214427	0.00217719	0.00187448	0.00156218	0.00296536	0.00410887	0.00395658	0.00179246	0.0026726	0.00223514
TGCCGA	0.00162657	0.00235174	0.00101142	0.00358147	0.000979015	0.00130157	0.00118659	0.00124175	0.00157296	0.00167915	0.00100849	0.00197183	0.00142609	0.00127865	0.00182796	0.00207795	0.00157884	0.00200172	0.00282437	0.00369481	0.00144602	0.00265967	0.00118764	0.00248021	0.00192197	0.00378504	0.00128168	0.00361018	0.00143458	0.00223059	0.00216934	0.00600291	0.000788899	0.00117293	0.00413829	0.00113862	0.000630196	0.00265458	0.00282631	0.00213757	0.00216909	0.00187448	0.00154792	0.00296536	0.00409997	0.00396076	0.00179246	0.00268139	0.00223514
TTGCCG	0.00162657	0.00236114	0.00106035	0.0035463	0.000908798	0.00131335	0.00118631	0.00125651	0.00157296	0.0016754	0.00100849	0.00201836	0.00127941	0.00129225	0.00181896	0.00204283	0.0015214	0.00201509	0.00297427	0.00371314	0.00144602	0.00265615	0.00119605	0.00248353	0.00194773	0.00378069	0.00129002	0.00362679	0.00143458	0.00224951	0.00217819	0.00597977	0.000788899	0.00117635	0.0041283	0.00113862	0.000623995	0.00265147	0.00284996	0.00215786	0.00214426	0.00190645	0.00154123	0.00296565	0.00410883	0.00396618	0.00179246	0.00267276	0.00223514
ATTGCC	0.00162668	0.00237105	0.00103723	0.00355543	0.000958711	0.00130768	0.00118631	0.00125146	0.0015839	0.00167972	0.00107095	0.00201168	0.00130446	0.00130167	0.00182806	0.00201187	0.00152575	0.00201053	0.00280841	0.00370312	0.00146936	0.0026564	0.00118831	0.00250107	0.00196504	0.00380306	0.00134965	0.00362332	0.00143458	0.00227279	0.00217819	0.00600271	0.000819672	0.00117236	0.00412846	0.00113862	0.000635151	0.00264598	0.00288532	0.00217114	0.00214461	0.00189947	0.00160084	0.00303372	0.00411778	0.0039815	0.00195694	0.00268162	0.00219891
CATTGC	0.00545593	0.00512242	0.00270584	0.00540273	0.00469242	0.00304772	0.00434894	0.00358628	0.00405073	0.00379846	0.00448073	0.00368546	0.00432868	0.00402461	0.00524952	0.00329051	0.00634038	0.00384014	0.00676773	0.00566683	0.00341858	0.00412912	0.00336834	0.00384215	0.00436018	0.00613836	0.00280956	0.00580968	0.00261209	0.00357776	0.00470308	0.00773242	0.005443	0.00349046	0.00676201	0.00359282	0.00313677	0.00449199	0.00546963	0.00434078	0.00451521	0.00387142	0.0039996	0.00412159	0.00593917	0.00548667	0.00374323	0.00468405	0.00463531
CCATTG	0.0104024	0.0105395	0.0106286	0.0104527	0.0105777	0.010607	0.0105699	0.0105649	0.0105926	0.0105099	0.0106825	0.0105326	0.0105531	0.0105977	0.0103967	0.0105035	0.0102667	0.0105184	0.0104102	0.0104434	0.011038	0.0105173	0.0106592	0.0105357	0.0107646	0.0105133	0.0109279	0.0106375	0.0107889	0.0105249	0.0104115	0.0102275	0.0111537	0.0104826	0.010477	0.0104977	0.0108822	0.0104868	0.0103102	0.0105332	0.0105657	0.0105527	0.0109744	0.0105713	0.0104797	0.0104724	0.0110311	0.0106874	0.0107733
CCCATT	0.00698663	0.00586409	0.00849722	0.00559349	0.00687407	0.00500809	0.00685269	0.00738743	0.0075088	0.00626821	0.00576994	0.00480401	0.00692118	0.00612487	0.00728585	0.00492917	0.00792612	0.00722785	0.0051998	0.00433462	0.00716823	0.00691262	0.00655147	0.00587435	0.00611967	0.00440966	0.00722432	0.00525613	0.00692186	0.005052	0.00678482	0.00351299	0.00585454	0.00373551	0.00362463	0.00632204	0.00749251	0.00646911	0.00720671	0.00729859	0.00576749	0.00690542	0.00697195	0.00420496	0.00437015	0.00530956	0.0070553	0.00589607	0.00571133
CCCCAT	0.00301294	0.0030679	0.00157149	0.00204657	0.00335452	0.00545045	0.00183687	0.00244422	0.00302034	0.00273681	0.00231065	0.00321186	0.00242255	0.00481841	0.00290563	0.00262624	0.00349988	0.00368122	0.00211043	0.0028457	0.00228331	0.00648439	0.00269465	0.0048123	0.00339615	0.00309463	0.00287553	0.00347151	0.00336243	0.0063714	0.00183	0.0029778	0.0018685	0.00518443	0.00168756	0.00323064	0.00400669	0.00249882	0.00250123	0.00401042	0.00244389	0.00157819	0.00505088	0.00496622	0.00194146	0.0017695	0.00333206	0.00336959	0.00291558
CCCCCA	0.0029391	0.00210706	0.00365249	0.0014088	0.00324457	0.00114847	0.00189301	0.00157876	0.00270898	0.00181763	0.00291613	0.000867268	0.00264379	0.00147128	0.00269495	0.000934043	0.00324167	0.00196304	0.0019859	0.00130132	0.00219999	0.00235261	0.00263822	0.00198839	0.00354138	0.00168695	0.00264697	0.00287733	0.00393987	0.00220347	0.0020867	0.00254166	0.00153197	0.00105622	0.00158679	0.00108899	0.00360361	0.00152757	0.00236085	0.00217237	0.00216359	0.0013312	0.0046667	0.00169566	0.00099385	0.00142921	0.00362186	0.0029799	0.00358512
CCCCCC	0.00121096	0.000562944	0.000217789	0.00029616	0.000444038	7.04229e-05	0.000370651	0.000291874	0.000485775	0.000392797	0.000665711	0.000161715	0.000590149	0.000188179	0.000634341	0.000185435	0.000861062	0.0002081	0.000255348	0.000295139	0.000467724	0.00013607	0.000755873	0.000199876	0.000268042	0.000324662	0.000344728	0.00113005	0.000140498	8.95665e-05	0.000731816	0.00114067	0.000469141	0.000159952	0.000496526	3.27955e-05	0.000460028	0.000132907	0.00152356	0.000106147	0.000732592	0.000188631	0.00120985	0.000143549	0.000204863	0.000370658	0.000485462	0.000353821	0.000581546
TCCCCC	0.00159758	0.000869207	0.00286099	0.000460349	0.00122826	0.000354432	0.000850898	0.000475661	0.00102293	0.000679515	0.00216386	0.000237671	0.00168288	0.000455558	0.00100477	0.000456242	0.000981416	0.000327262	0.000462361	0.000419421	0.000798245	0.000350541	0.00131611	0.000456444	0.00130774	0.000567152	0.000882489	0.00147846	0.00146817	0.000253913	0.00178058	0.00141619	0.000725936	0.000495956	0.00104507	0.000424258	0.0011154	0.000202853	0.00189538	0.000106881	0.000933139	0.00035546	0.00220289	0.000260522	0.000346087	0.000740801	0.00119929	0.000709683	0.00155863
TTCCCC	0.00921455	0.00592778	0.00803799	0.00465502	0.00754889	0.00386949	0.00799955	0.00640875	0.00765443	0.00562097	0.00820511	0.00305148	0.00848869	0.00491801	0.00709627	0.00504956	0.00866288	0.00413851	0.00526106	0.00361182	0.00639328	0.00260243	0.00823414	0.00373107	0.00795994	0.00401973	0.00790725	0.00619613	0.00806355	0.00301239	0.00776575	0.00454543	0.00778472	0.00318215	0.00439797	0.0043792	0.0075356	0.00511674	0.0069322	0.00576398	0.00736928	0.00594985	0.00845978	0.00291177	0.00363922	0.0050518	0.00770919	0.00618544	0.00697409
GTTCCC	0.00212329	0.000920661	0.000749801	0.000593994	0.00140692	0.00010152	0.000819279	0.000314046	0.00120281	0.000683477	0.000980941	0.000236446	0.000858563	0.000232158	0.00123513	0.000392947	0.00190022	0.000273566	0.001139	0.000306799	0.000754706	0.000100498	0.00118455	0.000311349	0.000332343	0.000556306	0.000582412	0.00158042	0.000366243	0.000225265	0.0013707	0.00140343	0.00207269	0.000284537	0.000658319	0	0.000577085	0.000216586	0.00220001	8.69772e-05	0.000905667	0.000458041	0.00139565	0.000159841	0.00024917	0.000500165	0.000877324	0.000458219	0.00170263
GGTTCC	0.00143691	0.000720599	0.000266218	0.000376575	0.000477227	0.000100973	0.000465107	0.000306975	0.000475115	0.000458893	0.000751121	0.000263874	0.000670088	0.000225994	0.000681211	0.000216713	0.000890075	0.000213077	0.000303888	0.000298247	0.0004652	0.000108194	0.000813056	0.000224283	0.000192136	0.000347363	0.000342927	0.00128068	8.96459e-05	0.000104735	0.000861234	0.00138034	0.000484948	0.000208014	0.000533568	3.43572e-05	0.000465411	0.000133335	0.00185711	9.36064e-05	0.000783275	0.000244671	0.00118946	0.000135104	0.000218889	0.000446122	0.00042081	0.000384701	0.000685448
GGGTTC	0.00138311	0.000706519	0.00026911	0.000322619	0.00050001	9.44096e-05	0.000450015	0.000257528	0.000536878	0.000440121	0.000774361	0.000184491	0.000681116	0.000191968	0.000739691	0.000216713	0.00086121	0.000227296	0.000276316	0.000263436	0.000502406	0.000139294	0.000815837	0.000213591	0.000213605	0.000343126	0.00037835	0.0012601	0.000140797	0.00014931	0.000818115	0.00136846	0.000469527	0.000174711	0.000538385	0	0.000487194	0.000137515	0.00184516	0.000112618	0.000793486	0.000199827	0.00125679	0.000158805	0.000195974	0.000455981	0.000473159	0.000447536	0.000770441
AGGGTT	0.00279169	0.00214302	0.00137171	0.00133639	0.00276866	0.00114315	0.00153632	0.00301906	0.00263813	0.00181042	0.00190745	0.000984487	0.00184572	0.00145186	0.00267968	0.00115204	0.00352783	0.00224565	0.00182029	0.00135871	0.00260398	0.00242832	0.00452069	0.00265875	0.00299802	0.00169341	0.0050778	0.00299532	0.0031182	0.00226678	0.00130923	0.00246179	0.00170017	0.00105198	0.00140738	0.00112263	0.00356649	0.00160703	0.00482436	0.00285457	0.00241529	0.00139656	0.00430505	0.00177154	0.000954935	0.00158711	0.00303194	0.00297129	0.00291461
CAGGGT	0.0028283	0.00219242	0.00134749	0.00139934	0.0028492	0.00119832	0.0015769	0.00178745	0.00248471	0.00179062	0.00205979	0.00105569	0.00181096	0.0015146	0.00269903	0.000965483	0.00349911	0.00222045	0.00182079	0.00135884	0.00271587	0.00249931	0.00437932	0.00252325	0.003038	0.00169149	0.0051554	0.00300687	0.00334521	0.00232543	0.00129889	0.00245024	0.00171543	0.00128827	0.00140411	0.00126445	0.00363533	0.00164445	0.00489797	0.00288228	0.0024576	0.0014045	0.00430473	0.00177188	0.000959747	0.00141575	0.00309569	0.00321516	0.00275849
TCAGGG	0.00469768	0.00355675	0.0021958	0.00335012	0.00300227	0.00126113	0.0024841	0.00422664	0.00358719	0.00313719	0.00317361	0.00208313	0.00213061	0.00196571	0.00455184	0.00304898	0.00583678	0.00306244	0.00284907	0.00226137	0.00436849	0.00263287	0.00449481	0.00287594	0.00419579	0.00217613	0.00531154	0.00357344	0.00456618	0.00250575	0.00241628	0.00309929	0.0017761	0.00108429	0.00144479	0.00217872	0.00386658	0.00371833	0.00498964	0.0046557	0.00434953	0.00366965	0.00472975	0.0021124	0.00260388	0.00290297	0.00438343	0.00347565	0.00282944
GTCAGG	0.00386955	0.00325228	0.00135974	0.00317035	0.00189859	0.00124334	0.00175971	0.00434565	0.00225575	0.0028276	0.00219432	0.00223514	0.0019232	0.00214736	0.00443474	0.00272832	0.00554108	0.00276482	0.00247875	0.00231159	0.00354216	0.00255627	0.00332481	0.00263631	0.00273514	0.00222446	0.0036429	0.00248984	0.00295489	0.00206327	0.0024505	0.00198492	0.00083092	0.00110225	0.00141924	0.00318774	0.00230265	0.0035944	0.00481898	0.00447554	0.00412635	0.0036244	0.00281217	0.00205538	0.00261837	0.00277312	0.00239397	0.00210879	0.000956216
GGTCAG	0.0016265	0.00234231	0.00101142	0.00354625	0.000892349	0.00130209	0.00120457	0.00123214	0.00157301	0.00168286	0.00105006	0.00192245	0.00126366	0.0012753	0.00182796	0.0021357	0.00146802	0.00200131	0.00276054	0.00372012	0.00145712	0.0027187	0.00113698	0.00246368	0.00194741	0.00376757	0.00125189	0.00360193	0.00149146	0.00228241	0.00209881	0.00593356	0.000788899	0.00118595	0.00412851	0.00113862	0.000651112	0.0026367	0.00282643	0.00215179	0.00211968	0.00190862	0.00146053	0.0030307	0.00406881	0.00399454	0.00179246	0.00267557	0.00219928
CGGTCA	0.00165458	0.00235184	0.00103843	0.00354625	0.00089786	0.00130309	0.00116795	0.00125746	0.00159526	0.00167532	0.00107095	0.00193923	0.00128023	0.00128204	0.00182796	0.0021357	0.00146397	0.00201457	0.00274426	0.00373735	0.0014681	0.00267061	0.00115581	0.00249467	0.00192993	0.00378479	0.00128905	0.00361844	0.00138976	0.00229149	0.00214297	0.00594517	0.000819345	0.00118607	0.00413563	0.00110389	0.000624074	0.00265904	0.00287336	0.00217209	0.00216062	0.00189683	0.00150175	0.0030192	0.00407758	0.00397743	0.00181604	0.00267845	0.00223514
TCGGTC	0.00169986	0.00241588	0.00108585	0.00355608	0.00110373	0.00129074	0.00120978	0.00128766	0.00161909	0.00172701	0.00135528	0.00197022	0.0012956	0.00128552	0.00182796	0.00216765	0.00155072	0.00204427	0.00276021	0.00372892	0.0014903	0.00267469	0.00121857	0.00252529	0.0020662	0.00378725	0.00129012	0.00362677	0.00144061	0.00230859	0.00222219	0.00599122	0.000804004	0.00119557	0.00414505	0.00113843	0.000629692	0.002655	0.00287336	0.00216518	0.0021698	0.00188566	0.00156725	0.00303296	0.00406935	0.00401198	0.0018558	0.00271823	0.0022758
CTCGGT	0.00170657	0.00242528	0.00113261	0.00357591	0.00112595	0.00129134	0.00120978	0.00128264	0.00160774	0.00172211	0.00135528	0.00196452	0.00146732	0.00126971	0.00190451	0.0021357	0.0015214	0.00215682	0.00276021	0.00372012	0.00149001	0.00269311	0.00122492	0.00251134	0.00205782	0.00378725	0.00129757	0.00363506	0.00149176	0.00232718	0.00231511	0.00600274	0.000836391	0.0011765	0.00417107	0.00110389	0.000929295	0.00267371	0.00288556	0.00217089	0.0021698	0.00189107	0.00172627	0.00304393	0.0040738	0.00401612	0.00191334	0.00274465	0.00231166
GCTCGG	0.00166853	0.00235179	0.00110802	0.00354625	0.000903315	0.00127812	0.00116795	0.00122233	0.0015839	0.00167528	0.00107095	0.00192771	0.00133673	0.0012554	0.00186398	0.0021357	0.0015214	0.00201902	0.00277617	0.00372012	0.00149001	0.00265237	0.00116842	0.00248712	0.00194636	0.00376753	0.00128902	0.00361842	0.00138976	0.00228621	0.00218726	0.00599699	0.000804004	0.00117193	0.00413824	0.00110389	0.000914149	0.00264956	0.00287336	0.00215748	0.00216053	0.00187995	0.00165832	0.00300816	0.00406436	0.00396899	0.00186239	0.00270775	0.00223514
TGCTCG	0.00161942	0.00235179	0.00101142	0.00355492	0.000914629	0.00128408	0.00116795	0.00121749	0.00159617	0.0016714	0.00107095	0.00197183	0.00128784	0.00125212	0.00183778	0.0021357	0.0015214	0.00201902	0.00276021	0.00370325	0.00147897	0.00264884	0.00116842	0.00248363	0.00195552	0.00377192	0.00128902	0.00361846	0.00138976	0.00227699	0.00216971	0.00600277	0.000804004	0.00117193	0.004149	0.00110389	0.00061918	0.00265386	0.00286154	0.00215748	0.00216053	0.00187995	0.00152614	0.00300816	0.00406886	0.00397318	0.00179252	0.00268152	0.00223514
TTGCTC	0.00388355	0.00380734	0.00205276	0.00456161	0.00269506	0.00257903	0.00386066	0.00225024	0.00278675	0.00267618	0.00359875	0.00293103	0.00363115	0.00295742	0.00309667	0.00303845	0.00287303	0.00259775	0.00513046	0.00477878	0.00230831	0.00389111	0.00252015	0.00356025	0.00339528	0.00518913	0.00180146	0.00416418	0.0019288	0.00339937	0.00355041	0.00649085	0.0032106	0.00298037	0.00625453	0.00342335	0.00236393	0.00323099	0.00465173	0.00280302	0.00312833	0.00273148	0.00332942	0.0039658	0.00530315	0.00478619	0.00248583	0.00358251	0.003323
GTTGCT	0.00395126	0.00390894	0.00261014	0.00480712	0.0028468	0.00272588	0.00392452	0.00295513	0.00292885	0.00295471	0.00371762	0.00316358	0.00356451	0.00334837	0.00320756	0.00452972	0.00296338	0.00290521	0.00519438	0.00527953	0.00232084	0.004076	0.00269982	0.00370789	0.00354517	0.00549799	0.00189001	0.00470398	0.00180035	0.00367012	0.00373184	0.00655485	0.00357191	0.00305313	0.00648668	0.00408028	0.00244871	0.00481302	0.00470502	0.00450568	0.00315013	0.00378575	0.00340865	0.0041107	0.0067853	0.00602994	0.00312681	0.00381614	0.00332966
CGTTGC	0.0039372	0.00383751	0.00205276	0.00457134	0.00283514	0.00270203	0.00395999	0.00235693	0.00287331	0.00275861	0.00369629	0.00294079	0.00357275	0.00306823	0.0031989	0.00303577	0.00279034	0.00273914	0.0051623	0.00482079	0.00233273	0.00396123	0.00268799	0.00362024	0.00356101	0.00523263	0.0018656	0.00420949	0.00175576	0.00348301	0.00372266	0.0064676	0.00357191	0.00304723	0.00647942	0.0036096	0.00241808	0.00327409	0.00470489	0.00282489	0.00313163	0.00279152	0.00339546	0.00395862	0.00529965	0.00474513	0.00253941	0.00362666	0.00336962
GCGTTG	0.00393709	0.00381818	0.00207648	0.00455396	0.0028415	0.00268461	0.00394115	0.00232754	0.00282782	0.0027624	0.00367204	0.00294079	0.00358074	0.00307128	0.00311701	0.00297337	0.00279034	0.00269898	0.0050505	0.0047866	0.00234327	0.00394261	0.00270059	0.00358914	0.00352755	0.00521533	0.00183565	0.004197	0.00175576	0.00347343	0.00373155	0.0064676	0.00355488	0.00304249	0.0064624	0.00357524	0.00240812	0.00326115	0.00470496	0.00282472	0.00313062	0.00278049	0.00338885	0.00393626	0.00528613	0.00473683	0.00255099	0.0036051	0.00329362
GGCGTT	0.00395849	0.00380878	0.00205276	0.00455396	0.00279088	0.00267815	0.00399688	0.00232267	0.00282782	0.00276614	0.00369293	0.00294629	0.00358885	0.00307444	0.00311692	0.00297337	0.00279034	0.00269451	0.00506654	0.00480342	0.00230974	0.00396027	0.00270069	0.00359918	0.00352755	0.00521977	0.00184314	0.00420112	0.00184472	0.00346426	0.00375815	0.00648492	0.00357007	0.00303795	0.00645941	0.00357524	0.00240812	0.00326115	0.00470496	0.00281808	0.00313897	0.0027694	0.00339539	0.00394701	0.00527713	0.00472379	0.00255099	0.00360512	0.00325224
CGGCGT	0.00473047	0.00456968	0.00694368	0.00512709	0.00416905	0.00431138	0.00659965	0.00351406	0.0041567	0.00388692	0.00511779	0.00330497	0.00718397	0.00444638	0.00386293	0.00422835	0.00354016	0.00312669	0.00555556	0.00566384	0.00282808	0.00460944	0.00326541	0.00408311	0.00472614	0.00600347	0.00224983	0.00460479	0.00298779	0.00384553	0.00653534	0.00653488	0.00549793	0.00355211	0.00747588	0.00493766	0.00338408	0.00436908	0.00527937	0.00413511	0.00325185	0.00367107	0.00488676	0.00478496	0.00591241	0.0058834	0.00327801	0.00421037	0.00419504
GCGGCG	0.00472916	0.00458571	0.00694368	0.00510103	0.00416902	0.00431138	0.00658072	0.00350332	0.0041567	0.00389221	0.00511779	0.00330494	0.00733227	0.00444601	0.00385392	0.00422835	0.00356948	0.00311713	0.00555556	0.00567254	0.00282808	0.00462103	0.00327819	0.00408655	0.00480259	0.00604958	0.00224983	0.00459598	0.00298804	0.00385019	0.00654453	0.00654654	0.00549793	0.00356204	0.00748309	0.00497148	0.00341319	0.00441761	0.00527937	0.00412684	0.00326112	0.00366476	0.00490867	0.00478496	0.0059085	0.0058876	0.00329121	0.00422799	0.00430453
CGCGGC	0.0191246	0.0179653	0.0202233	0.0184004	0.0179943	0.015452	0.019276	0.0179515	0.018626	0.0177766	0.0186357	0.0154907	0.0195042	0.0165789	0.0187448	0.0170254	0.0203463	0.0159919	0.0197234	0.0180119	0.0171983	0.0154694	0.0176059	0.0157425	0.0182129	0.0178944	0.018893	0.0184241	0.0161193	0.0147979	0.0197975	0.0196875	0.0203695	0.0143695	0.0192234	0.0167646	0.0159935	0.018302	0.0193153	0.0184644	0.0177325	0.0180444	0.0173282	0.015641	0.0185623	0.0189249	0.0169843	0.0170631	0.0176788
ACGCGG	0.00881697	0.00762799	0.00971084	0.00815476	0.00753785	0.00495678	0.00880531	0.00766607	0.00821897	0.00749202	0.00831021	0.00565084	0.0091002	0.00622993	0.00850335	0.00672283	0.0101053	0.00553234	0.00975574	0.00792529	0.0075927	0.00514494	0.00745697	0.00539149	0.00766814	0.0075746	0.00868574	0.00832418	0.00566552	0.00442787	0.00951333	0.00962946	0.00992825	0.00439702	0.00893735	0.00636708	0.00558041	0.00795221	0.00907683	0.0081818	0.00762276	0.00804376	0.00696372	0.00525411	0.00828113	0.00864951	0.00677465	0.00671131	0.0077596
CACGCG	0.00932186	0.00826802	0.0101409	0.00885679	0.00807903	0.00500313	0.00914932	0.00834727	0.00883018	0.00806419	0.00863521	0.0059081	0.0091578	0.00624307	0.00911745	0.00726512	0.0102837	0.00773744	0.00995158	0.0085806	0.00774668	0.00554821	0.0080762	0.00589989	0.00803956	0.00783235	0.00853355	0.0088256	0.00671383	0.00473429	0.00967048	0.00956632	0.0101466	0.00453994	0.0091367	0.00636903	0.00658124	0.00915568	0.0103186	0.00841644	0.00806629	0.00942591	0.00728001	0.00527813	0.00860641	0.00910745	0.00695199	0.00765742	0.00761422
TCACGC	0.00580189	0.00641191	0.00498353	0.006376	0.00517783	0.00483549	0.00660162	0.00562436	0.0049694	0.00554125	0.00502256	0.00426216	0.00723724	0.00544848	0.00591545	0.00504851	0.00607954	0.00656519	0.00669934	0.00732727	0.00412593	0.00523596	0.00401981	0.00483665	0.00512595	0.00732458	0.0021407	0.00708145	0.00425441	0.00433145	0.00654789	0.00905354	0.00544234	0.00395153	0.00751393	0.00531188	0.00507332	0.00682967	0.00692957	0.00594231	0.00519566	0.00602564	0.00509715	0.00493467	0.00680126	0.007248	0.00384459	0.00638055	0.00388815
CTCACG	0.00484901	0.00451488	0.00418972	0.00510219	0.00417678	0.00418701	0.00595737	0.00341403	0.00363197	0.00365693	0.00398005	0.00325969	0.00644724	0.00417495	0.00358806	0.00422518	0.00341505	0.00300576	0.00563276	0.005626	0.00284572	0.00445961	0.00306904	0.00399905	0.00395691	0.00580096	0.00180165	0.00454036	0.00255858	0.00361177	0.00593445	0.00651564	0.00511519	0.00332506	0.00715622	0.00478577	0.00320649	0.00431719	0.00521354	0.00411027	0.00329885	0.00366932	0.00446052	0.00467154	0.00585974	0.00577631	0.00274729	0.00405376	0.00381492
ACTCAC	0.00389855	0.00389764	0.00186244	0.00447046	0.00271977	0.00277782	0.00364463	0.0023298	0.00265992	0.00270397	0.00352959	0.00293416	0.0036243	0.00304229	0.00313165	0.00318145	0.00278643	0.00273269	0.0052679	0.00481827	0.00237475	0.00400463	0.00278352	0.00382417	0.00366012	0.00518872	0.00174363	0.00430954	0.00246583	0.00342649	0.00351957	0.00643288	0.00326208	0.00330871	0.00645188	0.00377594	0.00298588	0.00328082	0.00467887	0.00280285	0.00322165	0.00282815	0.00428701	0.00411479	0.00537142	0.00481683	0.00262905	0.0036786	0.0034755
CACTCA	0.00389855	0.0039023	0.0020796	0.0045055	0.00275886	0.00277782	0.00364473	0.0024876	0.00265992	0.0027518	0.00352959	0.00293416	0.0036243	0.00304658	0.00313195	0.00318145	0.00278643	0.00292244	0.00528378	0.00480958	0.00243855	0.0040011	0.00278352	0.0037651	0.00370281	0.00521943	0.00175108	0.00429768	0.00246583	0.00344249	0.00350955	0.00645686	0.00326208	0.00332714	0.00645523	0.00377594	0.00298104	0.00328514	0.00466711	0.00280285	0.00324636	0.00297763	0.00428047	0.00411479	0.00538543	0.00482524	0.00260466	0.00366389	0.00340111
TCACTC	0.00394068	0.00393152	0.0019122	0.00446271	0.00277586	0.00277831	0.00362619	0.00244338	0.00269363	0.00284268	0.00355327	0.00295111	0.00362553	0.00305645	0.00321241	0.00314733	0.00278643	0.00297792	0.00529974	0.00483506	0.00243855	0.00398684	0.00284354	0.00378269	0.00367786	0.00521031	0.00175108	0.0042941	0.00267105	0.00343761	0.00357593	0.00646284	0.00349726	0.00331823	0.00643184	0.00370899	0.00296008	0.00328541	0.00466711	0.00278293	0.00323018	0.00289613	0.00428047	0.00412533	0.00542536	0.00482969	0.00259302	0.00366683	0.00340111
TTCACT	0.0022314	0.00336949	0.00267954	0.00389784	0.00262725	0.00189842	0.00311832	0.00202359	0.00311695	0.00231703	0.00190228	0.00267577	0.00400329	0.00199119	0.0029495	0.00274585	0.00234054	0.00263764	0.00490517	0.00456463	0.00236274	0.00299259	0.00198606	0.00304106	0.00312801	0.00481555	0.00175235	0.00421307	0.00308293	0.00256663	0.00448173	0.00643444	0.00310911	0.00181466	0.00581957	0.00323988	0.00296601	0.00323574	0.00445484	0.00240457	0.00268054	0.00277481	0.00393884	0.00367997	0.00525357	0.00470343	0.00300478	0.00383475	0.0030469
CTTCAC	0.00246263	0.00394985	0.003377	0.00466245	0.00313809	0.00199131	0.00342456	0.0029212	0.00350521	0.00304649	0.00255296	0.0029954	0.00426958	0.00220675	0.00368407	0.00328829	0.00272492	0.00471019	0.00521838	0.00533548	0.00340503	0.00345438	0.00277133	0.00355287	0.00341002	0.00522231	0.00186609	0.0047092	0.00363797	0.00289634	0.00465712	0.00649404	0.0031549	0.00207986	0.00612614	0.00349156	0.00394071	0.00446874	0.00568296	0.00276814	0.0033284	0.00425747	0.00408939	0.00372537	0.00557059	0.00538954	0.0031745	0.00463069	0.00319491
TCTTCA	0.00681298	0.00727786	0.00467511	0.00841749	0.00364997	0.00255821	0.00422913	0.00849033	0.00574196	0.00637521	0.00490089	0.00561751	0.0038754	0.00395446	0.00810385	0.00700874	0.00894035	0.00587022	0.00791965	0.0073094	0.00793256	0.00361739	0.00660298	0.00488392	0.00618167	0.00645313	0.00898434	0.00761782	0.00602255	0.00322567	0.00622251	0.00978796	0.00301101	0.0021198	0.00579495	0.00533949	0.00383674	0.00871893	0.00994004	0.00857863	0.00807777	0.00842869	0.00498729	0.00435728	0.00906338	0.00846867	0.00566687	0.00571098	0.00340354
TTCTTC	0.0139451	0.0155285	0.0130088	0.0157611	0.0116092	0.0067995	0.011899	0.0162023	0.0152741	0.0139224	0.0126405	0.0109614	0.00996803	0.00879181	0.0164772	0.0144184	0.0166975	0.011532	0.0180958	0.0150439	0.0188935	0.00609943	0.0173471	0.00997426	0.0189242	0.0142254	0.0217555	0.0159992	0.018853	0.00662329	0.0124506	0.0191967	0.0109102	0.00465312	0.0154838	0.0106238	0.0146173	0.0162121	0.0175134	0.0155755	0.0188472	0.0169847	0.0164406	0.00990157	0.0170519	0.0174531	0.0174559	0.0171451	0.014694
CTTCTT	0.0101911	0.0104615	0.0100957	0.00908777	0.00973866	0.00596355	0.010709	0.00985426	0.010829	0.00916814	0.0103922	0.00681654	0.0108072	0.00737272	0.0111802	0.0086505	0.011343	0.00930408	0.0103961	0.00945865	0.0112603	0.00573512	0.0110854	0.00742531	0.0129814	0.00952682	0.0103194	0.0108529	0.0136826	0.00609056	0.00934832	0.0120683	0.00765887	0.00421149	0.00972984	0.00776902	0.0112636	0.010326	0.0103605	0.00995564	0.0111087	0.0106085	0.0121296	0.00682249	0.00948756	0.0108077	0.0106933	0.0118922	0.00856799
CCTTCT	0.00990251	0.00753393	0.00406534	0.00739674	0.00607236	0.00384779	0.0075851	0.00627528	0.00683617	0.0058458	0.00824664	0.00559074	0.00688727	0.0050726	0.00748608	0.00588938	0.00869251	0.00485463	0.00834779	0.00670322	0.0072122	0.00438275	0.00769382	0.00580174	0.00776019	0.00657199	0.00718951	0.00735231	0.00622652	0.00446885	0.00714359	0.00953959	0.00555756	0.00303906	0.00803083	0.00582177	0.00488608	0.00666099	0.00863324	0.00705544	0.00735908	0.00663082	0.0065335	0.00496056	0.00780047	0.0076966	0.00580442	0.00650721	0.00525245
ACCTTC	0.00268851	0.00397625	0.00187999	0.00443707	0.00287087	0.00225544	0.00290952	0.00219807	0.00348942	0.00314661	0.00332783	0.0046866	0.00278079	0.00230023	0.00339637	0.00372593	0.00220194	0.00277963	0.00405083	0.00445476	0.00349144	0.00317334	0.00288145	0.00386394	0.00417215	0.00466014	0.00283396	0.0052559	0.00448092	0.00361545	0.00283212	0.00747309	0.00302984	0.00259786	0.00583383	0.00292408	0.00399619	0.00326812	0.0041389	0.00274174	0.00289313	0.00342591	0.00490104	0.00448237	0.00504478	0.00529257	0.00473706	0.00540364	0.00541959
AACCTT	0.00217765	0.00306514	0.00161081	0.00372351	0.00186115	0.00164451	0.00208283	0.00146853	0.00280609	0.00218282	0.00208544	0.00233117	0.00183049	0.00155251	0.00237985	0.00273567	0.00167668	0.00233779	0.00344852	0.00406351	0.00250628	0.00278952	0.00228505	0.0031367	0.00381762	0.00425549	0.00231728	0.00477694	0.00372683	0.00278269	0.00239813	0.00697786	0.00141341	0.00122301	0.0048513	0.00177612	0.00184721	0.00302864	0.00344464	0.0023775	0.0025641	0.00236976	0.00383261	0.00364202	0.00446499	0.00460636	0.00276394	0.00458745	0.00284102
AAACCT	0.00234549	0.00361357	0.00301508	0.00416268	0.00233859	0.00290009	0.00304628	0.00243897	0.00314968	0.00289873	0.00211309	0.00291132	0.0030551	0.0025531	0.00255755	0.00377798	0.00212888	0.00247032	0.00368562	0.00484199	0.00266993	0.00326144	0.00249232	0.00329672	0.00354576	0.0045804	0.0022542	0.00407818	0.0034577	0.00294681	0.00283802	0.00609266	0.00278049	0.00159691	0.00527658	0.00264357	0.00167334	0.00392103	0.00381011	0.00365119	0.00258309	0.00324611	0.00393665	0.00412793	0.00492071	0.00525491	0.00272637	0.00477715	0.00291631
AAAACC	0.00211513	0.00296233	0.00168332	0.00378901	0.0017876	0.00163485	0.00226265	0.0014815	0.00267397	0.00203216	0.00193952	0.00220529	0.00186317	0.00156006	0.00265845	0.00276761	0.00164781	0.0023667	0.00333663	0.00405691	0.00271492	0.00277558	0.0022919	0.00313781	0.00351007	0.00419324	0.00221934	0.00383608	0.00373522	0.00290896	0.00257159	0.00600311	0.001446	0.00122326	0.00481415	0.00174315	0.00194468	0.00293824	0.00345691	0.00235752	0.00279869	0.00234282	0.00381362	0.00364189	0.00440262	0.00430754	0.00291735	0.00441613	0.00291305
GAAAAC	0.00218914	0.00295851	0.00170704	0.00373462	0.00182176	0.00162343	0.00214575	0.00145931	0.00272553	0.00197641	0.00197131	0.00218823	0.00194699	0.00154299	0.00239119	0.00273567	0.00150423	0.0023798	0.00333663	0.00409307	0.00251254	0.0027641	0.0024324	0.00311041	0.00363243	0.00421105	0.0022707	0.00386147	0.00326573	0.00292415	0.00249634	0.00599169	0.00137031	0.00121452	0.00487757	0.00178135	0.00196797	0.00293435	0.00344464	0.00235098	0.00286905	0.00234441	0.00401651	0.00369076	0.00440764	0.00430211	0.00280976	0.00444423	0.00280106
CGAAAA	0.00315604	0.00335863	0.00219068	0.00408141	0.00336523	0.00188021	0.00252934	0.00168849	0.00345401	0.00237982	0.00285545	0.002254	0.00243481	0.00183137	0.00312177	0.0028055	0.00248643	0.00259934	0.00426152	0.00420394	0.00311402	0.00292814	0.00393024	0.00343735	0.00480337	0.0045921	0.00320806	0.00445345	0.00465217	0.00310369	0.0033426	0.00604666	0.00317915	0.00130869	0.00571983	0.00189527	0.00277602	0.00305106	0.00380231	0.00237069	0.00442618	0.00264879	0.004428	0.00400691	0.00446558	0.00463376	0.00392878	0.00512148	0.00439985
CCGAAA	0.00329046	0.00491964	0.00226462	0.00457562	0.00365889	0.00261904	0.00281789	0.00357534	0.00409799	0.00373181	0.00314015	0.0033299	0.00345763	0.00316303	0.0043431	0.00342011	0.00404745	0.00410898	0.00588912	0.00561173	0.00372194	0.00344576	0.00432576	0.00397097	0.00607356	0.0061936	0.00345054	0.00660368	0.00564637	0.00344836	0.00358419	0.00896073	0.00210728	0.00214644	0.0063713	0.0036601	0.00442638	0.00445768	0.00395975	0.00392722	0.00581883	0.0042124	0.00599846	0.00454841	0.00588851	0.00608305	0.00403001	0.00697503	0.00372108
TCCGAA	0.00252511	0.00337944	0.00191878	0.00404672	0.00296351	0.00195256	0.0025805	0.00177584	0.00334744	0.00237607	0.00295994	0.00239031	0.00247972	0.00183244	0.00307497	0.00283662	0.00179274	0.00277341	0.00392394	0.00439951	0.0031678	0.00293397	0.00376592	0.00349731	0.00494172	0.004659	0.00319316	0.00424332	0.00461228	0.00308408	0.002742	0.00611677	0.0020662	0.00143144	0.00575267	0.0020344	0.00410741	0.0030326	0.00396929	0.00239119	0.00439085	0.00273495	0.0048133	0.00399381	0.00451067	0.00465469	0.00493559	0.00523142	0.00509101
ATCCGA	0.00219172	0.00313292	0.00175319	0.00399705	0.00233547	0.00175313	0.00247544	0.00159763	0.00296521	0.00216126	0.0022271	0.00232905	0.00220983	0.00164678	0.00291056	0.00276679	0.00179274	0.00257183	0.00364142	0.00422691	0.00276243	0.00279495	0.00245663	0.00318615	0.00375393	0.00431211	0.00246701	0.00388396	0.00354644	0.00295715	0.00238724	0.00610214	0.00182579	0.00137886	0.00498905	0.00188229	0.00323724	0.00294066	0.00393224	0.00236463	0.00272913	0.00241618	0.00429518	0.0036644	0.00442515	0.00434871	0.00422476	0.00454015	0.00436505
GATCCG	0.00176061	0.00267074	0.00159263	0.00365977	0.00150861	0.00164488	0.00150634	0.00137074	0.00179562	0.00191598	0.00146978	0.00216309	0.00168846	0.00156417	0.00238913	0.00241931	0.00169519	0.00227385	0.00316116	0.00416336	0.00187816	0.00276758	0.00146917	0.00265806	0.00239367	0.00399239	0.00158087	0.00375844	0.00177315	0.0024817	0.00235729	0.00607245	0.00156741	0.00124451	0.00468053	0.001815	0.00128059	0.00290406	0.00390701	0.00235803	0.00237619	0.00212786	0.00281107	0.00320935	0.00430058	0.00419288	0.00238346	0.00310904	0.00252423
CGATCC	0.00175472	0.00268103	0.00164826	0.00366853	0.00152658	0.00165698	0.00182436	0.0013812	0.00195951	0.0019287	0.00149145	0.00215201	0.00170595	0.00156821	0.00239923	0.00241931	0.00183877	0.00227385	0.00316116	0.00415582	0.00187937	0.00280708	0.00146264	0.00265135	0.00240389	0.00402275	0.00158076	0.00376258	0.00177315	0.00250207	0.00235724	0.0060782	0.00161515	0.00124927	0.00467454	0.001815	0.00135404	0.00291737	0.00393141	0.00235803	0.00237619	0.00214063	0.00283091	0.00316655	0.00429622	0.00418592	0.00234837	0.00320599	0.00264527
ACGATC	0.00175363	0.00264681	0.00159263	0.00365977	0.00151963	0.00165093	0.00150634	0.00138073	0.00179562	0.00191217	0.00144867	0.00215753	0.00181055	0.00156089	0.00238913	0.00241931	0.00183877	0.00227831	0.00316116	0.00414609	0.00183412	0.00276758	0.00144916	0.00265135	0.0023843	0.00399671	0.00157242	0.0037792	0.00177315	0.0024817	0.00240153	0.00604368	0.00159762	0.00123992	0.00467723	0.001815	0.00128164	0.00290872	0.00393141	0.00235803	0.00236806	0.00212235	0.00280259	0.00316655	0.00429176	0.00417205	0.00237158	0.00310898	0.00248837
TACGAT	0.00176054	0.00271613	0.00159263	0.00367747	0.00150774	0.0020616	0.00148799	0.0017452	0.00181827	0.00209375	0.00147034	0.00231112	0.00170435	0.00180089	0.00241888	0.0024822	0.00183877	0.00249446	0.00319292	0.00416359	0.00184499	0.00309392	0.00146173	0.00288015	0.0023843	0.00409467	0.00157234	0.00386082	0.00177315	0.00256689	0.00246566	0.00605541	0.00159762	0.00168217	0.00467069	0.00236763	0.00162152	0.00290542	0.00397834	0.00238484	0.00239251	0.0021451	0.00285838	0.00331257	0.00435059	0.00427132	0.00236001	0.00326373	0.00248837
TTACGA	0.00197816	0.00328503	0.00186025	0.0040389	0.0019958	0.00173943	0.00173137	0.00204304	0.00236984	0.00238533	0.00220634	0.00268056	0.00212436	0.00183236	0.00283424	0.00266992	0.00239887	0.00251002	0.00501236	0.00456412	0.00212504	0.00289266	0.00194796	0.00284177	0.00269381	0.00460249	0.0018642	0.00413188	0.00195556	0.00255141	0.00276796	0.00640922	0.00313514	0.0015444	0.00572371	0.003059	0.00212427	0.00310493	0.00417354	0.00241924	0.0027134	0.00269099	0.00354453	0.00354963	0.00515216	0.00462241	0.00259828	0.0036698	0.00349099
TTTACG	0.00179681	0.003219	0.00194895	0.00398702	0.00182319	0.0017483	0.00171439	0.00202823	0.00204842	0.00225788	0.00154198	0.00266428	0.00199602	0.00185717	0.00276589	0.00260602	0.00213279	0.00262486	0.00466798	0.00458312	0.00209174	0.00297524	0.00180746	0.00284244	0.00272647	0.00460139	0.00180626	0.00407649	0.0019648	0.00260064	0.00272957	0.006415	0.0021452	0.00151808	0.0054634	0.00302553	0.00211679	0.00314169	0.00399028	0.00239797	0.00256357	0.00261694	0.00346237	0.00358321	0.0051482	0.00467747	0.00251967	0.00374143	0.00275217
CTTTAC	0.0080433	0.00656155	0.00381952	0.00709318	0.00620023	0.00325014	0.00589318	0.00594858	0.00691026	0.00569081	0.00673764	0.00434056	0.00543324	0.00439944	0.00761564	0.0052506	0.00901281	0.00525836	0.00760525	0.00612874	0.00706578	0.00432645	0.00753045	0.00534635	0.00806427	0.00671837	0.00767973	0.00754257	0.00773359	0.00444336	0.00636783	0.00900256	0.00540777	0.00339926	0.00694094	0.00414263	0.00633399	0.00618316	0.00751067	0.00602737	0.00829855	0.00638348	0.00744496	0.00504196	0.00680354	0.0073332	0.00732453	0.00715124	0.00712617
GCTTTA	0.00445805	0.00351659	0.0018614	0.00448169	0.00329464	0.00236524	0.00357097	0.00201803	0.00315086	0.00265614	0.00352935	0.0025172	0.00346026	0.00269789	0.0034237	0.00274373	0.00365269	0.00245893	0.00489945	0.00421392	0.002475	0.00379291	0.00311814	0.00357364	0.00368892	0.00477137	0.00214356	0.00439099	0.00275004	0.00330605	0.00418143	0.00613228	0.00433064	0.00303218	0.00585041	0.00290185	0.00274793	0.00290467	0.00447776	0.00249655	0.00314823	0.00268213	0.00430265	0.00385381	0.00465475	0.00472937	0.00294714	0.00357138	0.00427537
AGCTTT	0.00387599	0.00335322	0.00128135	0.00434111	0.00251766	0.00239385	0.00321525	0.00206584	0.00259441	0.00249362	0.00345522	0.00252707	0.00340933	0.00279365	0.00301132	0.00271246	0.002729	0.00244482	0.00416163	0.00429034	0.00224155	0.00387126	0.002689	0.0035739	0.00356213	0.0048018	0.00169871	0.0041471	0.00252429	0.00336075	0.003617	0.00623528	0.0031041	0.00308536	0.00586954	0.00296845	0.00267574	0.00294257	0.00411469	0.00253611	0.00299857	0.00246111	0.00411019	0.00390699	0.00463161	0.00474928	0.00245429	0.00342689	0.00333237
GAGCTT	0.00387003	0.00335807	0.00132965	0.00433169	0.00251565	0.00243522	0.0033299	0.00207175	0.00259459	0.00250516	0.00346734	0.00253829	0.00340971	0.00277822	0.00300859	0.00271246	0.002729	0.00247262	0.00417767	0.00427377	0.00220855	0.00383525	0.00270915	0.00363021	0.00359669	0.00485671	0.00169871	0.00412228	0.00252429	0.00338728	0.00371808	0.00624108	0.00289594	0.00317202	0.00591037	0.00300227	0.00280425	0.0029599	0.00406158	0.00254959	0.00301518	0.00246746	0.00416469	0.00390699	0.00463165	0.00461918	0.00247946	0.00343305	0.00329241
AGAGCT	0.00387026	0.00336282	0.00132978	0.00434074	0.00242611	0.00242346	0.00330886	0.00205592	0.00241855	0.00246316	0.00348901	0.00253835	0.00342603	0.00274066	0.00305252	0.00271246	0.00270028	0.00246383	0.00417775	0.00426529	0.00220855	0.00383827	0.00286527	0.00358766	0.00360363	0.00484927	0.00169126	0.00411399	0.00252429	0.0033377	0.0036176	0.00621222	0.00289594	0.00312256	0.00590611	0.00300227	0.00267371	0.00293405	0.00406158	0.00257608	0.00301518	0.00246191	0.00418344	0.00390699	0.00460951	0.00461086	0.00251413	0.00341161	0.00329241
CAGAGC	0.00388183	0.00326497	0.00125354	0.00432163	0.00237536	0.00223975	0.00324463	0.00197087	0.00241213	0.00234228	0.00370301	0.00251378	0.00337864	0.00256088	0.00292983	0.0025385	0.00270028	0.00227566	0.00413615	0.004196	0.00211327	0.00367011	0.0023741	0.00339263	0.00319598	0.00473077	0.00157964	0.00394734	0.00174881	0.00324627	0.0036772	0.00619981	0.00281065	0.00276396	0.00572569	0.00272033	0.00197145	0.00288425	0.00408185	0.00258278	0.00293695	0.00233531	0.0030397	0.00377077	0.00454971	0.00448526	0.00231697	0.00321578	0.00325078
ACAGAG	0.00402472	0.00435857	0.00341731	0.00501092	0.00269598	0.00392275	0.00447242	0.0033122	0.00273523	0.00355091	0.00352676	0.00325586	0.00426302	0.00385603	0.00309321	0.00408218	0.00282231	0.00268198	0.00539532	0.00557558	0.00230233	0.00423016	0.00252931	0.00369651	0.00333306	0.00540642	0.0018608	0.00428888	0.00184012	0.00343475	0.00397385	0.00646817	0.00425202	0.00297054	0.00654153	0.00443321	0.00231365	0.0042109	0.00476225	0.00409072	0.00315448	0.00335421	0.00324227	0.00444235	0.00588567	0.00578734	0.00248217	0.00377661	0.00343681
AACAGA	0.00432807	0.00455418	0.00337197	0.00508329	0.00311377	0.00416188	0.00455651	0.00355742	0.00301978	0.00378171	0.00416641	0.00332487	0.00446743	0.00402486	0.00317196	0.00415618	0.00282231	0.00303325	0.00548542	0.00563082	0.00258294	0.0043273	0.00355733	0.00401131	0.00424041	0.00571563	0.00221285	0.0045811	0.00270685	0.00355663	0.0040725	0.00650582	0.0042346	0.0030176	0.00710685	0.00459005	0.002945	0.00429907	0.00478746	0.00409052	0.0046426	0.00372926	0.00344864	0.00476115	0.00590506	0.00590288	0.00315479	0.00428573	0.00409202
CAACAG	0.00212078	0.00345522	0.00234654	0.00419644	0.00213021	0.00199699	0.00181627	0.00295466	0.00235884	0.0026696	0.00215164	0.00288012	0.00208924	0.00220752	0.00287777	0.00420208	0.0020143	0.00289514	0.00490229	0.00513721	0.00263079	0.00310804	0.00282823	0.00328354	0.00338234	0.00508144	0.00224819	0.00480054	0.0027589	0.00277322	0.00277419	0.0065399	0.00202676	0.00157269	0.00591378	0.00372004	0.00260474	0.00476495	0.00407429	0.0040925	0.00415062	0.00393903	0.0028615	0.00393939	0.00670249	0.00616711	0.00352017	0.00423616	0.0033986
GCAACA	1.41299e-05	0.000134376	0.000533051	0.00027147	9.57833e-05	0.000115397	4.0879e-05	0.000774235	0.000134391	0.00034802	6.3538e-05	0.000286742	7.34914e-05	0.000401822	0.000231529	0.00158748	0.00014809	0.000373764	0.000127592	0.000519892	0.000313248	0.00020263	0.000140279	0.000234851	0.000207404	0.000328859	6.00982e-05	0.000539844	4.45931e-05	0.000297615	3.70924e-05	0.000162615	1.70261e-05	5.94743e-05	3.36085e-05	0.000646851	0.000314968	0.00158556	0	0.00166801	3.34122e-05	0.0010142	0.000138686	0.000174269	0.00153501	0.00135479	0.000671983	0.000298026	0
TGCAAC	1.40933e-05	5.48607e-06	0.000280511	3.57405e-05	5.53964e-06	8.65374e-05	2.15397e-05	0.000127157	1.14143e-05	0.000122018	2.09965e-05	4.23069e-05	6.52931e-05	7.85806e-05	4.72133e-05	9.40248e-05	2.88654e-05	0.000202957	7.94683e-05	2.6796e-05	7.30228e-05	5.55396e-05	7.16445e-06	5.27761e-05	8.75618e-06	2.87795e-05	3.04262e-05	2.3444e-05	0	7.23159e-05	5.45418e-05	2.88919e-05	1.70261e-05	5.01489e-05	0	0.000175289	0.000179087	3.36483e-05	0	6.60426e-06	0	2.54333e-05	0.000118921	1.07525e-05	2.30872e-05	5.61907e-05	0.000110105	4.42106e-05	3.996e-05
TTGCAA	1.40933e-05	0	0.000232212	1.7429e-05	0	1.25505e-05	0	0	1.14143e-05	7.60847e-06	0	1.10723e-05	3.26674e-05	3.36364e-06	9.17595e-05	9.40248e-05	2.88654e-05	9.01048e-06	7.94683e-05	1.80937e-05	5.69508e-05	1.08343e-05	3.81119e-05	6.85682e-06	1.72329e-05	8.7668e-06	5.26178e-05	4.27584e-06	9.27543e-05	4.6543e-06	0.000302345	2.88617e-05	0	1.39166e-05	3.45736e-06	3.34717e-05	0.00012615	4.45303e-06	0	6.60426e-06	0	6.34888e-06	0.000119617	1.07525e-05	4.42838e-06	8.3862e-06	1.16358e-05	2.96956e-05	3.71968e-05
CTTGCA	1.43182e-05	4.78067e-05	8.21563e-05	8.71452e-06	4.88934e-05	4.5488e-05	0	6.54508e-05	2.22365e-05	6.43288e-05	2.16666e-05	3.66231e-05	0.000186794	9.47739e-05	0.00013067	9.30368e-05	0	2.9227e-05	7.94683e-05	2.85214e-05	5.66558e-05	8.73672e-05	0	3.93445e-05	1.69086e-05	7.07633e-05	2.25405e-05	0.000273391	9.27543e-05	0.00012011	0.000275568	4.11069e-05	0	0.000185161	0	0	3.62418e-05	2.83731e-05	0	4.32094e-05	3.69076e-05	0.000126305	9.44796e-05	0.000145254	3.74034e-05	8.47517e-06	2.65569e-05	2.67316e-05	7.43937e-05
TCTTGC	0.0021642	0.000555005	7.93877e-05	0.000391493	0.00101771	0.000696022	0.00176163	0.000243393	0.000561304	0.000311622	0.00201478	0.000234375	0.00175924	0.000890939	0.000414322	0.00037151	0.000889931	0.000141256	0.000461828	0.000202873	0.000121024	0.000528425	0.00093447	0.000687019	0.00084582	0.000439543	6.73509e-05	0.000422409	0.000134469	0.000440964	0.00105834	4.10776e-05	0.00118391	0.000400311	0.000977479	0.00036872	0.00038912	0.000144733	0.000685843	0.000301078	0.000620923	0.000186912	0.000583273	0.000427592	0.000125828	0.000112966	0.000186478	6.45297e-05	0.000649068
CTCTTG	0.00042928	0.000609644	0.00064472	0.000594074	0.000558931	0.00011543	0.000308143	0.000769973	0.000590226	0.000704153	0.000636763	0.00090445	0.000353526	0.000182467	0.000801585	0.000640442	0.000207434	0.00205031	0.000629885	0.000807996	0.0011245	0.000479813	0.00144907	0.000624201	0.00101662	0.000497402	0.000502494	0.000406594	0.00115196	0.000274017	0.000178659	7.05877e-05	6.69385e-05	0.00025286	0.000794454	0.000103437	0.00151627	0.00118456	0.00118135	0.00030815	0.000859907	0.00135858	0.000350265	0.000151356	0.000325131	0.000509342	0.000786703	0.00101255	0.000567402
TCTCTT	0.00164753	0.00279402	0.00101867	0.00355029	0.00104109	0.00245134	0.00126761	0.00205448	0.00161714	0.00249869	0.00105331	0.00272669	0.00105354	0.00224329	0.00186648	0.003122	0.0015214	0.00183869	0.00302368	0.00431644	0.00143534	0.00141847	0.0012798	0.00155893	0.00192993	0.00384057	0.00149253	0.00370164	0.00162879	0.0010582	0.00205476	0.00595799	0.00103301	0.000992539	0.00373435	0.00161583	0.000733037	0.00335368	0.00292059	0.0028876	0.00231332	0.00263545	0.00174766	0.00246487	0.00427831	0.00473765	0.00181579	0.00284121	0.00224369
TTCTCT	0.00183363	0.00342692	0.00303132	0.00401237	0.00157044	0.0031826	0.00245114	0.00278719	0.00206095	0.00295467	0.00109227	0.00276397	0.00195391	0.00293313	0.00219425	0.00460293	0.00190336	0.0021124	0.00458747	0.00554444	0.00170312	0.00201238	0.00147823	0.00169837	0.00216407	0.00433422	0.00156453	0.00366598	0.00152469	0.00111676	0.00242039	0.00623668	0.00265623	0.00115086	0.00473878	0.00253613	0.00098962	0.00376097	0.00405233	0.00318448	0.00245961	0.00301458	0.00183492	0.00289071	0.00522594	0.00499787	0.00194463	0.0030754	0.00272477
CTTCTC	0.0034231	0.00304533	0.00366076	0.00384647	0.00232875	0.00152663	0.00314439	0.00145083	0.00228366	0.00200955	0.00266665	0.00233886	0.00259618	0.00173615	0.00260054	0.00247818	0.00264889	0.00193488	0.00443024	0.00434494	0.00249746	0.00106563	0.00221311	0.0016744	0.00283002	0.00406246	0.00155885	0.00350869	0.00176393	0.000927388	0.00354446	0.00629919	0.00270923	0.00115856	0.00496843	0.00144345	0.00135266	0.00279232	0.00458163	0.00185358	0.00288718	0.00228094	0.002274	0.00222653	0.00469874	0.00414051	0.00250781	0.00294035	0.00320466
TCTTCT	0.00352934	0.00518695	0.00425253	0.00462076	0.00399605	0.00369386	0.00373018	0.0039877	0.00449964	0.00451836	0.00319762	0.00331777	0.00319447	0.00388626	0.00473956	0.00471727	0.00465862	0.00396665	0.0058588	0.00623185	0.00487914	0.00214186	0.00389751	0.00274678	0.00641537	0.00617305	0.00383548	0.0061	0.00604237	0.00218073	0.00319019	0.00882929	0.00258915	0.00154992	0.0056499	0.00270568	0.00478303	0.00508522	0.00461948	0.00468981	0.00569676	0.00459516	0.00500794	0.00389908	0.005791	0.00643443	0.00597861	0.00686668	0.00578689
GTTCTT	0.00245445	0.00393906	0.00154546	0.00437127	0.00228906	0.00233521	0.00185747	0.00264908	0.00291975	0.00322118	0.00162113	0.00299937	0.00219699	0.002867	0.00371126	0.00288321	0.00429209	0.00341108	0.00490945	0.00529841	0.00230023	0.00360473	0.00167935	0.00290468	0.00297525	0.00520917	0.00160409	0.005729	0.00216516	0.00307284	0.00277876	0.0087483	0.0016749	0.00262712	0.00502485	0.00218322	0.00157028	0.00413779	0.00445233	0.004021	0.0035999	0.0031039	0.00236824	0.00345641	0.00540059	0.00519733	0.00234521	0.00404941	0.00264063
CGTTCT	0.00166159	0.00235157	0.000843322	0.00354612	0.000897952	0.0013016	0.00116824	0.00114026	0.0016062	0.00167526	0.00111361	0.00194963	0.00123878	0.00126547	0.00183697	0.00210522	0.0015214	0.00180001	0.00277617	0.00375403	0.0015345	0.00267591	0.00118122	0.00250394	0.00194632	0.00373294	0.0014028	0.00361253	0.00157824	0.00229556	0.00221538	0.00599119	0.000834527	0.00119967	0.00413799	0.00113843	0.000629039	0.00265861	0.00289683	0.00216408	0.00216136	0.00175295	0.00161473	0.00301898	0.00403774	0.00394817	0.00178076	0.00266428	0.00216432
CCGTTC	0.0013445	0.000408263	0.000192405	0.000252724	0.000454791	0.000100381	0.000391206	0.000166523	0.000472739	0.000230301	0.000397554	7.23682e-05	0.000684535	0.000178277	0.000594394	0.000216713	0.000890225	9.04275e-05	0.000255106	0.00035631	0.000430196	5.03563e-05	0.000888774	0.000233677	0.000311487	0.000156609	0.00100504	0.000286496	0.000412596	8.01649e-05	0.000489692	0.000190137	0.000471745	0.000107488	0.000877343	6.75019e-05	7.7727e-05	8.24763e-05	0.00182006	6.67414e-05	0.000845105	0.000132522	0.000636626	8.8465e-05	8.41481e-05	7.15475e-05	0.00041901	6.20649e-05	0.000721902
CCCGTT	0.00136564	0.000394408	0.000459043	0.000244142	0.000432674	0.000105969	0.000576923	0.000111551	0.000750232	0.000325327	0.000356299	6.65277e-05	0.000717591	0.000148708	0.000675991	0.000216713	0.00086121	9.38086e-05	0.000223102	0.000348089	0.000707915	3.71895e-05	0.000991421	0.000243223	0.00037281	0.000108117	0.000996003	0.000261466	0.000314465	1.86418e-05	0.00089402	0.00014991	0.000488131	5.11099e-05	0.000847464	0.00010238	5.82624e-05	7.43265e-05	0.00184461	5.97525e-05	0.000821963	0.000160712	0.000642176	3.28186e-05	0.000110713	7.16359e-05	0.000430765	3.85068e-05	0.000686018
ACCCGT	0.00140167	0.000375581	0.000410742	0.000244142	0.000444161	7.68353e-05	0.000576923	9.83155e-05	0.000772012	0.000298839	0.000398184	0.000106271	0.000708757	0.000134904	0.000614107	0.000216713	0.000889926	7.587e-05	0.000191347	0.000359106	0.000751956	2.57031e-05	0.00103314	0.000241085	0.00040739	9.07861e-05	0.00101812	0.00027453	0.000365918	7.04283e-05	0.000987681	0.000167586	0.000394215	0.000106122	0.000865561	0	7.42052e-05	7.93479e-05	0.00187977	4.67143e-05	0.000831709	0.000150211	0.000679549	3.41412e-05	9.35103e-05	5.09151e-05	0.000455602	5.56369e-05	0.000685075
CACCCG	0.00128158	0.000361044	0.000120437	0.000252902	0.000427255	6.44699e-05	0.000390154	6.77429e-05	0.000417756	0.000175525	0.000356299	4.42045e-05	0.000676421	0.000127921	0.000540603	0.000216713	0.000889779	6.69107e-05	0.000191431	0.000246	0.000408176	1.42936e-05	0.000819122	0.000185608	0.000287094	7.78067e-05	0.000253265	0.000202891	0.000268938	3.7783e-05	0.000426828	0.000127028	0.000379109	2.76183e-05	0.000850937	0	3.86709e-05	2.59368e-05	0.00178573	3.31915e-05	0.000731014	0.000110362	0.000534895	1.08633e-05	6.63808e-05	2.09113e-05	0.000395677	1.45946e-05	0.00061298
ACACCC	0.0013606	0.000376109	0.000515523	0.000244142	0.000597902	7.66305e-05	0.000371717	6.77429e-05	0.000644054	0.000206934	0.00098143	6.13292e-05	0.000835625	0.000134648	0.000734009	0.000216713	0.00086121	6.24668e-05	0.00020764	0.000254391	0.000544905	1.42936e-05	0.000858145	0.000188875	0.000668719	0.000121361	0.000482123	0.000211794	0.000546184	2.32486e-05	0.000454178	0.000126874	0.000394138	3.70431e-05	0.000982224	0	0.000143265	2.59368e-05	0.00179782	3.97287e-05	0.000763647	0.000105176	0.000765686	1.08633e-05	7.56633e-05	6.81166e-05	0.000634678	0.000111313	0.00105564
CACACC	0.00136844	0.000412168	0.00104048	0.000252857	0.000652187	6.44699e-05	0.000390452	0.000128083	0.000858292	0.000250019	0.00177866	4.97264e-05	0.000952495	0.000137942	0.00094614	0.000216713	0.000832493	7.58907e-05	0.000175306	0.000254478	0.000726491	2.60955e-05	0.000864328	0.000192232	0.000931053	0.000144369	0.000489572	0.0004717	0.000821512	5.07941e-05	0.000454178	0.000121072	0.000394138	3.2233e-05	0.000982224	0	0.000149469	3.08905e-05	0.00182184	3.97287e-05	0.000792072	0.00022534	0.000854493	1.08633e-05	7.54489e-05	7.66146e-05	0.000789756	0.000151041	0.00157114
TCACAC	0.00412496	0.0056614	0.00302298	0.00872204	0.00309941	0.00395694	0.00315958	0.0030021	0.00449133	0.00442998	0.00259109	0.00529291	0.00278568	0.00433568	0.00480486	0.00480918	0.00428493	0.00544935	0.0077369	0.00848207	0.0041758	0.00886674	0.00304993	0.00694855	0.00419995	0.00858488	0.00287068	0.00790046	0.00338588	0.00544732	0.00470629	0.0123021	0.00368437	0.00530417	0.00870006	0.00247873	0.00220903	0.00602147	0.00709902	0.00517775	0.0046864	0.00476326	0.00372842	0.00763104	0.00913744	0.00843743	0.00451661	0.004737	0.00590916
CTCACA	0.00171826	0.00246142	0.00103627	0.00364589	0.00097642	0.00143486	0.00118949	0.00132633	0.001784	0.00203232	0.00109216	0.00233982	0.00123873	0.00139576	0.00186566	0.00229707	0.00149268	0.00219272	0.00285811	0.00385861	0.00214865	0.00281857	0.00117477	0.00268991	0.00195554	0.00391644	0.00127412	0.00390915	0.00149453	0.00233014	0.00218713	0.00599122	0.000804004	0.00125089	0.00416168	0.00145259	0.000766453	0.00275478	0.00287368	0.00236249	0.00216875	0.00203035	0.00154987	0.00309762	0.00427315	0.0041071	0.00212981	0.002244	0.00236696
TCTCAC	0.00326378	0.00277552	0.00103627	0.0039855	0.00181999	0.00143873	0.00241155	0.00129332	0.00190374	0.00198481	0.00270854	0.00237494	0.00247066	0.00157951	0.00238992	0.00232803	0.00221046	0.00208871	0.0030968	0.00387552	0.0022494	0.002757	0.00195753	0.00281296	0.00242279	0.00396547	0.00131136	0.0039362	0.00172175	0.00229155	0.00326547	0.00603734	0.00192831	0.00129857	0.00466834	0.00144821	0.000994593	0.00274812	0.00344117	0.00245878	0.00258922	0.00211903	0.00202052	0.00310848	0.00424587	0.00407282	0.00222945	0.00226508	0.00283885
CTCTCA	0.00171972	0.00235318	0.00101142	0.00353772	0.000972274	0.00128957	0.00120812	0.00110891	0.00163167	0.00164463	0.00107106	0.00196607	0.00124065	0.00121905	0.00191158	0.00210522	0.00149268	0.00198277	0.00287345	0.00370321	0.00139066	0.00266143	0.00121054	0.00246747	0.00193938	0.00378883	0.00126022	0.0035921	0.00138976	0.00224365	0.00198635	0.00600848	0.000835339	0.00113471	0.00374757	0.00110389	0.000665823	0.00262412	0.00288544	0.00224678	0.00218642	0.00198221	0.00157359	0.00300719	0.00409097	0.0039142	0.00181729	0.00269075	0.00227254
ACTCTC	0.0017641	0.00253933	0.00103627	0.0035832	0.00122375	0.00145903	0.00124805	0.0011942	0.0016445	0.0017661	0.00133686	0.00250459	0.00126596	0.00136461	0.0021225	0.0021357	0.00149268	0.00204929	0.00297073	0.00374641	0.00140211	0.00269881	0.00132443	0.00251887	0.00210112	0.00392079	0.00126032	0.00369926	0.00158714	0.00251046	0.00212008	0.00607333	0.000866674	0.00159114	0.00377828	0.00110389	0.000755831	0.00275402	0.00289726	0.00221924	0.00225442	0.00231293	0.0017637	0.00321124	0.00412819	0.00409015	0.00189162	0.00288517	0.00238779
CACTCT	0.00167671	0.00236653	0.0010355	0.00354657	0.000938366	0.00129549	0.00116795	0.0011139	0.0015839	0.00165619	0.00105253	0.00194945	0.00125641	0.00124485	0.00189947	0.0021357	0.0015214	0.00198817	0.00285597	0.00370308	0.00140317	0.00267204	0.00114402	0.00248438	0.00194632	0.00378024	0.00125177	0.00356671	0.00153629	0.00224952	0.00194873	0.00598536	0.000804004	0.00113445	0.00368348	0.00110389	0.000619799	0.00263675	0.00287324	0.00215812	0.00219619	0.00189101	0.00151954	0.00301806	0.00408216	0.00394566	0.00182761	0.00265199	0.00219795
CCACTC	0.00170497	0.00233736	0.00101142	0.00356368	0.000943123	0.00131293	0.00116795	0.0012831	0.00158419	0.00164789	0.00102885	0.00194393	0.0012471	0.00123826	0.00182796	0.0021357	0.0015214	0.00196449	0.00282405	0.00370308	0.00139072	0.00267204	0.00113672	0.002491	0.00195445	0.00377592	0.00125177	0.003575	0.00143458	0.00225845	0.00198328	0.00601994	0.000804004	0.00115738	0.0036993	0.00110389	0.000646245	0.00267112	0.00288506	0.00217807	0.00217833	0.00189678	0.00151954	0.00300752	0.00405997	0.00393084	0.00182761	0.00265199	0.00219795
TCCACT	0.00167572	0.00233271	0.00101142	0.00359048	0.000911266	0.00131329	0.00116795	0.00114834	0.00160701	0.00171301	0.00104963	0.00197282	0.00125573	0.00123831	0.00180996	0.0021357	0.0015214	0.00198262	0.00282397	0.00367787	0.00139072	0.00267213	0.00113672	0.00246346	0.0019381	0.00377159	0.00127637	0.00357526	0.00153659	0.00226278	0.0020014	0.00601994	0.000853637	0.00116231	0.00372332	0.00116982	0.000637164	0.00265828	0.00288506	0.00217135	0.00216175	0.00190802	0.0015402	0.00304175	0.00405107	0.00393516	0.00180409	0.00267892	0.00219795
TTCCAC	0.00171243	0.00237188	0.00114116	0.00354639	0.000971932	0.00128957	0.00148647	0.00114948	0.00176255	0.00171173	0.00104984	0.00197331	0.00133066	0.0012797	0.00189439	0.0021357	0.0015214	0.0019755	0.00303931	0.00374693	0.00146557	0.00265784	0.00118281	0.00246353	0.00196656	0.00382752	0.00126714	0.00358452	0.00143458	0.00235765	0.00195791	0.00596313	0.000852872	0.00131154	0.00371063	0.00110389	0.00086191	0.00266781	0.0028972	0.00216391	0.00218546	0.00201566	0.00168619	0.00301822	0.00406053	0.00394842	0.00188566	0.00276587	0.00227254
TTTCCA	0.0016978	0.00235708	0.00111772	0.00366197	0.000898807	0.00135615	0.00116795	0.00118811	0.0015619	0.00179377	0.00109194	0.00210935	0.00127153	0.0013327	0.0018192	0.00226383	0.0015214	0.00207055	0.00277601	0.00371164	0.00149012	0.0026689	0.00124101	0.00259513	0.00201377	0.00379928	0.00127412	0.00384797	0.00143458	0.00225816	0.00211615	0.00594489	0.000788821	0.00124245	0.00409122	0.00137985	0.000629809	0.00266765	0.002885	0.00232124	0.00216053	0.00198238	0.00154006	0.00300753	0.00418797	0.00394793	0.00180409	0.00273019	0.00219795
CTTTCC	0.0017193	0.00235826	0.00113692	0.00366835	0.000875589	0.0012718	0.00131794	0.00115414	0.00166262	0.00161	0.00120287	0.0019664	0.00125503	0.00128967	0.00184778	0.0021357	0.00149298	0.00195579	0.00279172	0.00364502	0.00155693	0.00265515	0.00141917	0.00265001	0.00203872	0.00373477	0.00149328	0.00367796	0.00147964	0.00215307	0.00216217	0.00596322	0.000941223	0.00119459	0.00411513	0.00100398	0.000701098	0.00263692	0.00293296	0.00215094	0.00214557	0.00188633	0.00177993	0.00289927	0.0040585	0.00390281	0.00190208	0.00277038	0.00223437
ACTTTC	0.00396303	0.0032559	0.00280816	0.00489549	0.00227104	0.00234278	0.00448944	0.00185194	0.0027081	0.00218743	0.00337732	0.00288013	0.00422292	0.0023563	0.00272874	0.00309572	0.00244735	0.002547	0.00381062	0.00404918	0.00247131	0.00374838	0.0024431	0.00379807	0.00413323	0.00471979	0.00221393	0.00426214	0.00251877	0.00338015	0.00361778	0.00706195	0.00334609	0.00284223	0.00641876	0.00161639	0.00150682	0.00310945	0.00384976	0.00254513	0.00295639	0.00249025	0.00285477	0.00400116	0.00484121	0.00501331	0.00256292	0.00327182	0.00345825
AACTTT	0.0025547	0.00408516	0.00135385	0.00441138	0.00203928	0.00482726	0.00163941	0.00298754	0.00229992	0.00364307	0.0015989	0.00417213	0.00222389	0.00372115	0.00334035	0.00435841	0.00397366	0.00397216	0.00357843	0.00582679	0.00197843	0.00372306	0.00147044	0.00380579	0.00280795	0.00558743	0.00152874	0.00608564	0.00188514	0.00556851	0.0027664	0.00867774	0.000988054	0.00292317	0.00429964	0.0034204	0.00123097	0.00477164	0.00335892	0.0047733	0.00342654	0.00303568	0.00187025	0.00474176	0.00544469	0.00527656	0.00230064	0.00394455	0.00223514
GAACTT	0.00243866	0.00339327	0.0012297	0.00414997	0.00170038	0.00179235	0.00154276	0.00243172	0.00208455	0.00275755	0.00155557	0.00258078	0.00189495	0.00228801	0.00336744	0.00250761	0.00397412	0.0034276	0.00349812	0.00449747	0.0019564	0.00297859	0.00146199	0.0027064	0.00274937	0.00476217	0.00153623	0.00557289	0.00188514	0.00248931	0.00256318	0.0084692	0.000941216	0.00149495	0.00418881	0.00117693	0.00115005	0.00394285	0.00335922	0.0037738	0.00340797	0.00285371	0.00177506	0.00308374	0.00465872	0.0049233	0.00228826	0.0037754	0.00219795
TGAACT	0.00165454	0.00231371	0.00101142	0.00355479	0.000858969	0.00127775	0.00116795	0.00112377	0.00138586	0.00157554	0.00109194	0.00193306	0.00122242	0.00118917	0.00181887	0.0021357	0.0015214	0.00196005	0.00269621	0.00360269	0.0014792	0.00265784	0.00118781	0.00247762	0.00194632	0.00372401	0.00128157	0.00358337	0.00143458	0.00217383	0.00216045	0.00597385	0.000788821	0.00118067	0.00409488	0.000970511	0.000669131	0.00262362	0.00288524	0.00215063	0.00220265	0.00184679	0.00158077	0.00298557	0.00403785	0.00393078	0.00180409	0.00265808	0.00219795
GTGAAC	0.00231545	0.00230007	0.00182852	0.0035849	0.00134747	0.00135042	0.00247815	0.00119614	0.00184813	0.00166594	0.00137154	0.00198101	0.00283881	0.00126557	0.00207868	0.0021357	0.001639	0.00213963	0.00271217	0.00361974	0.0013798	0.00267756	0.00121419	0.00251007	0.00213981	0.00385073	0.00126683	0.00359053	0.00143458	0.00220366	0.00355462	0.00602015	0.00122439	0.00119808	0.00389945	0.00100871	0.00078418	0.00265666	0.00304224	0.00215063	0.00221909	0.00189427	0.00163018	0.00299678	0.00401128	0.00398231	0.00198696	0.00218381	0.00238121
TGTGAA	0.00241447	0.00239455	0.00192625	0.00373283	0.00135861	0.00127763	0.00254904	0.00124148	0.00186884	0.00165446	0.0015222	0.00200482	0.00288893	0.00124337	0.00208775	0.00219778	0.001639	0.00197895	0.00277634	0.00368714	0.00145858	0.00265784	0.00131185	0.00247444	0.00216454	0.00383874	0.00150364	0.00361775	0.00148084	0.00225763	0.00356361	0.00603181	0.00125491	0.00116216	0.00395321	0.00113771	0.000818228	0.00262404	0.0031016	0.00211751	0.00224455	0.00192537	0.00156684	0.00292045	0.00405116	0.00411651	0.00195842	0.00230427	0.00241899
AGTGTG	0.0020071	0.00427578	0.00187831	0.00678709	0.00138527	0.00244395	0.00198332	0.00212073	0.00272805	0.00307054	0.00176449	0.00381052	0.00135288	0.00226032	0.00311537	0.00402421	0.00215302	0.0037824	0.00539308	0.00715274	0.00247266	0.00533716	0.0015384	0.00468399	0.00359733	0.0074175	0.00227262	0.0069183	0.00265049	0.0045525	0.00367228	0.0118902	0.00121387	0.00243121	0.00699037	0.00217432	0.00119487	0.00520401	0.00396093	0.00422827	0.00359107	0.0036494	0.00253239	0.00592798	0.00803577	0.00786249	0.00330837	0.00426012	0.00374687
CAGTGT	0.00164063	0.00231844	0.00098733	0.00350254	0.000892236	0.00124835	0.00116795	0.00110878	0.0015839	0.00162113	0.00102885	0.00193289	0.00100246	0.00117926	0.0018463	0.0021357	0.00149283	0.00190638	0.00280817	0.00367778	0.0013798	0.00261855	0.00113672	0.00242816	0.0019381	0.00373243	0.00125177	0.00352532	0.00143458	0.00223885	0.00192982	0.00600851	0.000804004	0.00114873	0.00369275	0.00107042	0.000614365	0.00259769	0.00287324	0.0021108	0.00217693	0.00186889	0.00150635	0.00290958	0.0040067	0.00393074	0.00180409	0.00213584	0.0021619
ACAGTG	0.0016686	0.0023433	0.00101154	0.00353745	0.000956438	0.00125421	0.00120592	0.00113869	0.00162941	0.00162496	0.00100785	0.00195527	0.00124745	0.00121214	0.0018373	0.0021357	0.00152418	0.00192513	0.00282429	0.00367886	0.00140258	0.00263694	0.00126984	0.00249581	0.00195574	0.00374597	0.00126675	0.00357948	0.00153659	0.00235187	0.00196611	0.00604311	0.000804004	0.0011438	0.0037227	0.00107042	0.000624545	0.00260223	0.00288519	0.0021244	0.00217693	0.00189101	0.00153933	0.00300385	0.0040067	0.00392239	0.00182824	0.00214173	0.0021619
CACAGT	0.00219956	0.00269181	0.00147027	0.00391375	0.00190138	0.00127233	0.00154121	0.00159568	0.00230186	0.00195459	0.00113353	0.00214915	0.00146903	0.00136062	0.00251559	0.00216682	0.00250283	0.00198338	0.00420482	0.00378099	0.00159009	0.00267932	0.00146813	0.00262419	0.00213826	0.00417327	0.00134151	0.00373767	0.00152516	0.00233649	0.00227038	0.00614764	0.00243844	0.001204	0.00430977	0.00110407	0.000998839	0.00277985	0.00320485	0.00213085	0.00225953	0.00237436	0.00155936	0.00331995	0.00430907	0.00415409	0.00228481	0.00298551	0.00288922
TCACAG	0.00172527	0.00262551	0.00101142	0.00356355	0.00106557	0.0013386	0.00118949	0.00133863	0.0017515	0.0019656	0.00132498	0.00207492	0.00105131	0.00131415	0.00185651	0.0021357	0.00152155	0.00215371	0.00279452	0.0036863	0.00227174	0.00271324	0.00118193	0.0025162	0.00226865	0.00387847	0.0015406	0.00447818	0.0019911	0.00233858	0.00218718	0.00690805	0.000788821	0.00115217	0.00412811	0.00114209	0.00105344	0.00276929	0.00287318	0.00215727	0.00222722	0.00198275	0.00154966	0.00299632	0.00409623	0.00407445	0.00235216	0.00334297	0.00236831
GTCACA	0.00171541	0.00294235	0.00148612	0.00436923	0.00129993	0.00139137	0.00150769	0.00168446	0.00213331	0.00229528	0.00134541	0.00230382	0.0011687	0.00129667	0.00246243	0.00257816	0.00178119	0.00250687	0.00406145	0.00461429	0.00183825	0.00300328	0.00146613	0.00280983	0.00211239	0.00419836	0.00128953	0.00380926	0.00161935	0.00227216	0.00221645	0.00624682	0.00167041	0.00145024	0.00475365	0.00130648	0.00125884	0.0033609	0.003915	0.00235496	0.00237763	0.00260474	0.00167407	0.00310662	0.00469209	0.00425362	0.00194706	0.00292448	0.0023793
CGTCAC	0.00268972	0.0036617	0.00554713	0.00435943	0.00281904	0.00172918	0.00345494	0.00191585	0.00370867	0.00253396	0.0038362	0.00253383	0.00317738	0.00169572	0.00301369	0.00277482	0.00206454	0.00241654	0.00481642	0.00427599	0.003252	0.00281526	0.00343702	0.00327392	0.00523901	0.00490495	0.00311971	0.00494837	0.00434507	0.00287383	0.00313211	0.00717452	0.00313908	0.00159562	0.00592655	0.00156682	0.00296729	0.00294997	0.00369805	0.00223397	0.0043405	0.00281484	0.00321413	0.00385992	0.00491564	0.00467309	0.00386351	0.00483167	0.00451175
CCGTCA	0.0142558	0.0110895	0.0138948	0.0107812	0.0123576	0.0131118	0.0149472	0.00992575	0.011136	0.0107243	0.015595	0.00983126	0.014573	0.0123189	0.00971615	0.0119298	0.00979132	0.00729795	0.0119138	0.0106815	0.0094202	0.0119432	0.0125428	0.0114663	0.0128479	0.0106535	0.011472	0.00871284	0.0109224	0.0107394	0.0126924	0.00806421	0.0145914	0.00992226	0.013698	0.0116763	0.0104063	0.00941715	0.0112576	0.010345	0.0115462	0.00927358	0.0118703	0.0118626	0.0106693	0.0103065	0.0112716	0.00963918	0.0130484
ACCGTC	0.00913607	0.0070635	0.00961774	0.00773552	0.00780633	0.00454355	0.00926334	0.00656438	0.00870994	0.00664648	0.00907198	0.00472671	0.00880565	0.00496964	0.00725086	0.00682546	0.00763057	0.00454274	0.00937862	0.00703943	0.00724757	0.00478911	0.00865544	0.00570701	0.00922929	0.00686641	0.00954962	0.00671583	0.00798977	0.00470583	0.00906752	0.00698513	0.00992009	0.00357889	0.00960885	0.00579615	0.00715918	0.00674069	0.00855528	0.00644329	0.00821242	0.00735204	0.00820806	0.00578133	0.00774836	0.00769354	0.00907515	0.0073524	0.00969904
TACCGT	0.00935794	0.00757584	0.012301	0.00858648	0.00817355	0.0046079	0.00982669	0.0073828	0.00908655	0.0073394	0.00931076	0.00501686	0.00905469	0.00513695	0.00789731	0.00730551	0.00793035	0.00656915	0.00956185	0.00778068	0.00803461	0.00525062	0.00929656	0.00619076	0.00975404	0.00730676	0.00964925	0.00698401	0.00831868	0.00487499	0.00947143	0.00705585	0.00992135	0.00385039	0.00980223	0.00593238	0.00803569	0.00793505	0.0097362	0.00683907	0.00865801	0.00850863	0.00852289	0.00593559	0.00805116	0.00823622	0.00979869	0.00784708	0.00992866
ATACCG	0.00178722	0.00335085	0.00177612	0.0041006	0.00164047	0.00148769	0.00183218	0.00188062	0.00198878	0.00260091	0.00115929	0.00262014	0.00170825	0.0018804	0.00238511	0.00389959	0.00183877	0.00243222	0.00435899	0.00485716	0.0019106	0.00107891	0.00178744	0.00172516	0.00266243	0.00440415	0.0016117	0.00419868	0.00266277	0.00114235	0.00232747	0.00658993	0.001714	0.00139753	0.00476717	0.00220118	0.00178075	0.0028458	0.00413529	0.00334177	0.00264055	0.00257121	0.00294467	0.00258457	0.00474905	0.00538923	0.0024129	0.00343903	0.00272345
GATACC	0.00174754	0.0027256	0.00159288	0.00346913	0.00142182	0.00126183	0.00159682	0.00136206	0.00193718	0.00182883	0.00109227	0.00215594	0.00120692	0.0013552	0.00221082	0.00241642	0.00183877	0.001872	0.00405874	0.00419978	0.00166844	0.000808224	0.00140552	0.00138045	0.00216096	0.00378658	0.00129662	0.00338914	0.00152469	0.000833524	0.00218133	0.00622379	0.00161288	0.000937384	0.00449417	0.00134303	0.00097509	0.00264247	0.00401287	0.00167432	0.00247427	0.00222501	0.00183365	0.0021625	0.00453361	0.0040496	0.00196802	0.00290797	0.00263332
AGATAC	0.00174063	0.00272088	0.00159288	0.00346037	0.00142194	0.00125023	0.00157818	0.00136708	0.00191523	0.00182893	0.00109227	0.00214492	0.00119094	0.00134161	0.00221226	0.00241642	0.00183877	0.00195746	0.00407478	0.00419171	0.00155806	0.000791766	0.00137938	0.00135712	0.00214449	0.00376494	0.00128925	0.00338916	0.00157584	0.000819946	0.00212104	0.00620067	0.00161288	0.000924053	0.00451991	0.00134303	0.000965406	0.00264819	0.00398965	0.00162795	0.00246647	0.00221953	0.00174003	0.0021621	0.00450725	0.0040454	0.00196802	0.00287452	0.00256028
AAGATA	0.00166178	0.00226121	0.000987709	0.00326854	0.000950982	0.00107188	0.00120863	0.00122366	0.00159661	0.00160544	0.00109475	0.00177333	0.000987324	0.00118811	0.00187812	0.00198123	0.0015214	0.00173481	0.00293942	0.00359723	0.00126971	0.000779506	0.00114321	0.00128959	0.0020287	0.00345909	0.00128255	0.00329959	0.00166585	0.000823383	0.00201168	0.00592282	0.000788976	0.000782704	0.00369347	0.000844307	0.000748574	0.00239923	0.00290877	0.00138759	0.00218507	0.00194031	0.00149026	0.00197953	0.00378313	0.00391136	0.00180942	0.00296286	0.00223514
TAAGAT	0.00163355	0.00219954	0.000963243	0.00323294	0.000864623	0.000902522	0.00116795	0.0010748	0.0015839	0.0014877	0.00100785	0.00172852	0.000977906	0.00103201	0.00182796	0.00198123	0.0015214	0.00157584	0.00279188	0.00357615	0.00123653	0.000643406	0.00111764	0.0012011	0.00194684	0.00339967	0.00125937	0.0032144	0.00143458	0.000758855	0.00192963	0.00589883	0.000788976	0.000724022	0.00367933	0.000535547	0.00061918	0.00232157	0.00289683	0.00137435	0.00218507	0.00181911	0.00146055	0.00195398	0.00372853	0.00380102	0.00176919	0.00265095	0.00219795
GTAAGA	0.00326695	0.00447094	0.00187868	0.00646527	0.00178587	0.00204614	0.00237338	0.00216952	0.00318993	0.00307513	0.0020157	0.00355097	0.0020293	0.00230154	0.00360195	0.00387005	0.00307152	0.00330421	0.00555234	0.00711039	0.00272722	0.00157252	0.00231179	0.00256792	0.00386808	0.00694066	0.00257873	0.00653071	0.00286917	0.00165393	0.00398438	0.0117863	0.00183701	0.00175785	0.00740037	0.0011377	0.00122932	0.00478557	0.00574672	0.00296126	0.00442023	0.00371633	0.00299815	0.00400547	0.00760693	0.00764015	0.00358491	0.0052218	0.00435985
GGTAAG	0.0016686	0.00235606	0.000963613	0.00353754	0.000914487	0.00130262	0.00116795	0.00117954	0.0015839	0.00166364	0.00107117	0.00194946	0.001198	0.00121999	0.00183772	0.00210459	0.00154982	0.00198747	0.00279188	0.00371223	0.00130379	0.00266856	0.00111757	0.00246339	0.00195437	0.00378494	0.00126686	0.00353784	0.00143458	0.0022817	0.00192963	0.00593921	0.000804561	0.00117664	0.00370609	0.00110389	0.000625164	0.0026236	0.00288506	0.0021377	0.0021852	0.00190204	0.00147441	0.00298741	0.00405532	0.00396136	0.00176919	0.00266073	0.00227082
TGGTAA	0.0016476	0.00234224	0.000963613	0.00354621	0.000909685	0.00130799	0.00120748	0.00118999	0.00159485	0.0016692	0.00102885	0.0019385	0.00122317	0.00122388	0.0018473	0.00207363	0.00154997	0.00198747	0.00282363	0.00371246	0.00126981	0.00266888	0.00111132	0.00245685	0.00192989	0.00378483	0.00126644	0.00355014	0.00143458	0.00227303	0.0019567	0.00593347	0.000788976	0.00116741	0.00369646	0.00110389	0.00061913	0.00262352	0.00288506	0.00215772	0.00217702	0.00189649	0.00147454	0.00300782	0.0040466	0.00395699	0.00175761	0.00266465	0.00227082
CTGGTA	0.00168284	0.00234345	0.000963613	0.00353754	0.00087576	0.00130138	0.00116795	0.00117936	0.0015839	0.00167545	0.00102885	0.0019612	0.0012471	0.00124611	0.00182796	0.00207363	0.0015214	0.00197422	0.00288839	0.00369536	0.00134713	0.00266166	0.00110496	0.0024949	0.00195458	0.00379353	0.0012593	0.00353799	0.00143458	0.00226773	0.00202317	0.00598554	0.000804004	0.00118661	0.00371002	0.00110389	0.00062529	0.00261953	0.00288506	0.00215793	0.00219556	0.00188548	0.00153371	0.00302015	0.00406068	0.00396525	0.00174609	0.00266221	0.00223514
TCTGGT	0.00177496	0.00312544	0.00178632	0.00387894	0.00154403	0.00165627	0.00170866	0.00194775	0.0020157	0.00212858	0.00117594	0.00259348	0.00164104	0.00172004	0.00232527	0.00250882	0.0018965	0.00233802	0.00473198	0.00451335	0.00194586	0.00281602	0.00142414	0.00275511	0.00228649	0.00449787	0.00132661	0.00391222	0.00156975	0.0023614	0.00240316	0.00638581	0.00188736	0.00142684	0.00525956	0.00298734	0.00132009	0.00309205	0.00397764	0.00241142	0.0025418	0.00258614	0.00202418	0.00349904	0.00509285	0.00452814	0.00198008	0.00328395	0.00266994
TTCTGG	0.00183138	0.00313012	0.00183344	0.00387889	0.00160541	0.00164981	0.00167137	0.00199643	0.00203722	0.00213186	0.00117574	0.0026045	0.00164104	0.00171668	0.00235219	0.00250882	0.0018965	0.00232462	0.0047818	0.00451335	0.00198951	0.00281248	0.00145568	0.00274855	0.00227827	0.00449785	0.00133398	0.00393705	0.00156975	0.00236608	0.00243839	0.00640312	0.00195009	0.00142223	0.00526628	0.00298734	0.0013249	0.0030963	0.00400045	0.00240481	0.0025418	0.00259695	0.00202418	0.00347726	0.00509278	0.00453655	0.00201475	0.0032838	0.00270599
TTTCTG	0.00188401	0.00366489	0.00212661	0.00438952	0.00162391	0.00213364	0.00225834	0.00260071	0.00236131	0.00274744	0.00126225	0.00404047	0.0019598	0.00227135	0.00259374	0.00343503	0.0018965	0.00261057	0.00469981	0.00472388	0.00228942	0.00308596	0.00172773	0.00343361	0.0023612	0.00491273	0.00202382	0.00411603	0.00198411	0.00322885	0.00283253	0.00677583	0.00191821	0.00208694	0.00546084	0.0040626	0.00155557	0.00326952	0.00395375	0.00261072	0.00254928	0.00298326	0.00225467	0.00435362	0.00559563	0.00491766	0.00219299	0.00345065	0.00266994
CTTTCT	0.00408857	0.00452322	0.00340279	0.0050565	0.00293092	0.00388003	0.0050815	0.0034705	0.00320229	0.00358362	0.00356873	0.00323968	0.00418352	0.00385828	0.0030508	0.00426322	0.00287974	0.00272762	0.00565648	0.00543806	0.0028743	0.00423698	0.00247921	0.00381346	0.00411816	0.00561959	0.00219191	0.00432527	0.00265204	0.00354776	0.00378504	0.00644531	0.00437606	0.00294654	0.00677412	0.00433328	0.0021314	0.00421944	0.00480017	0.00399567	0.00323747	0.00348443	0.00336854	0.00463477	0.00571658	0.0056416	0.00277397	0.00395731	0.00389825
CCTTTC	0.00402791	0.00293296	0.00383099	0.0039854	0.00218769	0.00187559	0.00333873	0.00139626	0.00280658	0.00206944	0.00386241	0.00216461	0.00316238	0.00201543	0.0024468	0.00244846	0.00258997	0.00207306	0.00322664	0.00384773	0.00186151	0.00315774	0.00209753	0.0033017	0.00337483	0.00419248	0.00170758	0.0038175	0.0020263	0.00255701	0.0035357	0.00601558	0.00195987	0.00145604	0.00520862	0.00147261	0.00109138	0.00279908	0.0036563	0.00238297	0.00282739	0.00220238	0.00250294	0.00326785	0.00419466	0.00408538	0.00241676	0.00278685	0.00358762
CCCTTT	0.00386821	0.00361895	0.00181462	0.00446857	0.00193735	0.00167557	0.00256909	0.00181066	0.00290994	0.00278687	0.0023986	0.0027505	0.00177499	0.00189983	0.00362884	0.00257594	0.00374435	0.00240508	0.00420555	0.0041518	0.00367386	0.00284353	0.00121392	0.00285654	0.00317766	0.00392293	0.00173472	0.00389841	0.00265211	0.00303289	0.00357004	0.00595891	0.000957526	0.0014209	0.00424101	0.00211204	0.0010856	0.00333246	0.00295548	0.00237137	0.00413608	0.00344305	0.00228735	0.00332337	0.00433388	0.0042296	0.0027826	0.00278259	0.00248919
TCCCTT	0.00237666	0.00307227	0.00159456	0.00387634	0.00162516	0.00197688	0.00210058	0.00165115	0.00250366	0.00274888	0.00197756	0.00254359	0.00181076	0.00209675	0.0021616	0.00258222	0.00208089	0.00230608	0.00355502	0.00402004	0.00166958	0.00308384	0.00163555	0.00295866	0.00218993	0.00391358	0.00177654	0.00401333	0.00198676	0.00374269	0.00234444	0.00601806	0.00208838	0.00192446	0.00491527	0.00308494	0.000917519	0.0029033	0.00309167	0.00255101	0.00246192	0.00232086	0.00229067	0.00358343	0.00439578	0.00461081	0.00212792	0.00285996	0.0034209
GTCCCT	0.00228024	0.0040309	0.00187423	0.00409316	0.00194899	0.00781189	0.00211924	0.00248995	0.00271155	0.00383669	0.00225711	0.00526012	0.00341684	0.00483063	0.00216164	0.00568093	0.00160907	0.00332715	0.00280886	0.00648024	0.00163853	0.00445596	0.00151718	0.00496498	0.0025732	0.00538885	0.00168582	0.00456174	0.00249382	0.00983985	0.00271258	0.00647156	0.00115052	0.00456367	0.00483542	0.00694845	0.00105855	0.00442765	0.00286241	0.00423007	0.00240336	0.00231665	0.00225099	0.00675357	0.00571822	0.00512955	0.00208073	0.0030778	0.00297269
CGTCCC	0.00425136	0.00380213	0.00376722	0.00451335	0.00271539	0.00521057	0.00352713	0.00204127	0.00282653	0.00289873	0.00447943	0.00383969	0.00403286	0.00381262	0.00288289	0.00419701	0.00253224	0.00281821	0.00333862	0.00525631	0.0018251	0.00440134	0.00243537	0.0044659	0.00367507	0.00512549	0.00194759	0.00428882	0.00234911	0.00639941	0.00390643	0.0061841	0.00205096	0.00425186	0.00536511	0.00347412	0.00187297	0.00369454	0.00358402	0.003402	0.00290247	0.00217993	0.00312768	0.00516811	0.00494665	0.00455048	0.00262417	0.00320453	0.00362373
CCGTCC	0.00237334	0.00517614	0.00200246	0.00698602	0.00177685	0.00506595	0.00224876	0.00297544	0.00294137	0.003892	0.00194806	0.00517037	0.00204539	0.00380065	0.00320087	0.00575932	0.00223903	0.00392475	0.00547371	0.00834436	0.00245219	0.00492773	0.00163859	0.00495359	0.00377709	0.00809071	0.00228178	0.0070973	0.00324565	0.0061097	0.00408534	0.0113299	0.00149939	0.00534725	0.00706962	0.00360537	0.00155084	0.00562328	0.0039996	0.00447195	0.00358526	0.00370917	0.00275616	0.00759195	0.00835365	0.00733042	0.00364657	0.00548736	0.00389184
GCCGTC	0.00506466	0.00589072	0.00497624	0.00608502	0.00528921	0.00918281	0.00544905	0.00467961	0.00445513	0.00562827	0.00615783	0.00697073	0.00555535	0.007752	0.00404766	0.00700948	0.00290027	0.00516668	0.00429335	0.00672596	0.00418069	0.00909011	0.00526768	0.00811768	0.0062184	0.00728767	0.00403172	0.0060074	0.00655349	0.00916493	0.00478394	0.00678151	0.00451002	0.00835343	0.00706637	0.00657079	0.00579534	0.00510089	0.00382235	0.00589255	0.00565386	0.00391723	0.00638939	0.00925905	0.00653283	0.00649323	0.00635009	0.00661394	0.00709376
AGCCGT	0.0046871	0.00445797	0.00212872	0.00468959	0.00413941	0.00286357	0.00448067	0.00255649	0.00404687	0.00300665	0.00499547	0.00301796	0.00442079	0.00298357	0.00373921	0.00342581	0.00291675	0.00295504	0.00558886	0.00490039	0.00347034	0.0041596	0.00458061	0.00425981	0.00568451	0.00569901	0.00312477	0.00475537	0.00488456	0.00398381	0.00397809	0.00647058	0.00343324	0.00309551	0.00712912	0.00340776	0.00502802	0.00332442	0.0046685	0.00280313	0.00515973	0.00334239	0.00559112	0.00477737	0.00541274	0.00510211	0.00503428	0.00568683	0.0058067
TAGCCG	0.0104272	0.0104866	0.0106078	0.010307	0.0106253	0.0106365	0.010628	0.0104944	0.0105942	0.0105531	0.0105554	0.0104757	0.0105605	0.0105576	0.0104203	0.0105624	0.0104109	0.0105227	0.0100527	0.0103821	0.00994917	0.0105145	0.0106631	0.0104874	0.0106994	0.0104784	0.0104978	0.0104347	0.0107849	0.0105074	0.0104373	0.0102674	0.0105859	0.010511	0.0104792	0.0104324	0.0106883	0.0104583	0.0103713	0.0104861	0.0105891	0.0104131	0.0107881	0.0105518	0.0104258	0.0104648	0.010403	0.010618	0.0106394
TTAGCC	0.0104617	0.0104769	0.0106322	0.010307	0.01063	0.0106551	0.0106468	0.0105002	0.0106162	0.0105614	0.0105338	0.0104475	0.0105688	0.0105717	0.0104306	0.0105002	0.0104109	0.0105408	0.0101487	0.0104169	0.0106393	0.0105547	0.0106631	0.0104943	0.0106746	0.0105007	0.0106128	0.0104432	0.0108897	0.0105313	0.0104371	0.010256	0.0105703	0.0105204	0.010476	0.0104661	0.0108312	0.0104677	0.0103948	0.0105064	0.0105233	0.0104186	0.0108329	0.0105741	0.0103937	0.010473	0.0107125	0.0106544	0.0107236
GTTAGC	0.00962339	0.00909877	0.0122872	0.00945641	0.00854561	0.00663225	0.0102636	0.00952652	0.00905015	0.00909063	0.00869874	0.00650949	0.00998697	0.00753214	0.00929574	0.00865468	0.0104637	0.00800546	0.0100349	0.00962667	0.00786917	0.00624586	0.00821456	0.00608694	0.00812338	0.00826829	0.00864308	0.00907521	0.00690673	0.00482083	0.0100429	0.00963113	0.011543	0.0045578	0.00976968	0.00781712	0.00655056	0.0104058	0.0109879	0.00996665	0.00817447	0.0104828	0.00731089	0.00594229	0.0093509	0.0102165	0.00711467	0.00785372	0.00781088
AGTTAG	0.0100628	0.00921094	0.010415	0.00928228	0.00863544	0.00856928	0.00982055	0.00908304	0.00929566	0.00913532	0.00916114	0.00762751	0.0096655	0.00820783	0.00914153	0.00923538	0.0104558	0.00828341	0.00996096	0.0100404	0.00778955	0.00683196	0.00824366	0.00741216	0.0084521	0.00891627	0.00851885	0.00945914	0.00681662	0.00803226	0.00979168	0.00978096	0.0102058	0.00612612	0.00971888	0.00871257	0.0067755	0.0100907	0.0104367	0.0097311	0.00814914	0.00960155	0.00731779	0.00714026	0.00948395	0.00957935	0.00704313	0.0077132	0.0079096
TAGTTA	0.00929444	0.00722251	0.00936719	0.00820663	0.00660976	0.0054286	0.00894325	0.00776272	0.00746648	0.00669503	0.00727992	0.00546243	0.00860502	0.00640303	0.00795506	0.00683905	0.00980315	0.00555354	0.00941987	0.00769379	0.00654639	0.0054588	0.00623942	0.00574416	0.00680694	0.00773002	0.0067523	0.00719945	0.00469368	0.00458037	0.00907516	0.00860157	0.00813283	0.00395362	0.00811275	0.0074053	0.00452032	0.00796487	0.00895031	0.00830776	0.00687251	0.00765597	0.00605586	0.00593438	0.00845068	0.00829408	0.00542216	0.0054482	0.00607442
GTAGTT	0.00880322	0.0068296	0.00922412	0.00804312	0.0068711	0.00501938	0.00863371	0.00721939	0.00721509	0.00651172	0.0071393	0.00529008	0.00853217	0.00601553	0.00798973	0.00672206	0.00951644	0.00558275	0.00880092	0.00750885	0.00641589	0.00530335	0.00663174	0.00542432	0.00667896	0.00715934	0.00704523	0.00707481	0.00506491	0.0045085	0.00901459	0.00846265	0.00824065	0.00435139	0.00774603	0.00623373	0.00449842	0.00769925	0.00880916	0.00802881	0.00687101	0.00731835	0.00605692	0.00560138	0.00814541	0.00791234	0.00554446	0.00571918	0.0063065
CGTAGT	0.00819535	0.00636724	0.00900584	0.00748997	0.00620787	0.00437136	0.00835383	0.00627914	0.00667264	0.00577734	0.00696934	0.00472411	0.00797394	0.00492447	0.00654242	0.00644331	0.00712146	0.00414361	0.00827495	0.00670665	0.00610653	0.00469447	0.00644056	0.00504869	0.00630849	0.00643517	0.00703316	0.0061805	0.00520537	0.00405245	0.00870467	0.00695342	0.00830601	0.00357114	0.00778836	0.00592821	0.00459813	0.006624	0.00839383	0.00645879	0.00573097	0.00650277	0.00608134	0.005202	0.00767266	0.00729351	0.0058011	0.00523136	0.00626931
ACGTAG	0.0081518	0.00624971	0.00885916	0.00747219	0.00586636	0.00455856	0.00835383	0.00628936	0.00662787	0.00574289	0.00683923	0.00482083	0.00797263	0.00507281	0.00645009	0.00625288	0.00712146	0.00435112	0.00799517	0.00673281	0.00600349	0.00502253	0.00593715	0.00519868	0.00612881	0.00652831	0.00671088	0.00605161	0.00469608	0.00430667	0.00844175	0.00699952	0.00799265	0.00413261	0.00759816	0.00606618	0.00389332	0.00657126	0.008358	0.00649999	0.00561001	0.00644024	0.00565935	0.00535842	0.00770065	0.00730317	0.00528491	0.00471429	0.00623288
CACGTA	0.00907208	0.00703829	0.00922165	0.00774527	0.00751603	0.00479734	0.00933123	0.00660353	0.00898007	0.00659202	0.00892815	0.00497532	0.00896178	0.00527035	0.00732183	0.00670729	0.00742613	0.00482141	0.00901264	0.00699866	0.00739874	0.00512057	0.00832911	0.00596571	0.00883665	0.00715211	0.00916632	0.00667764	0.0080506	0.00495553	0.0092149	0.00702132	0.0100449	0.00425609	0.00909673	0.0062183	0.00713683	0.00672749	0.00847052	0.00650017	0.00789876	0.00729299	0.00868018	0.00608748	0.00780723	0.00774271	0.00894796	0.00716714	0.00964268
GCACGT	0.00889594	0.0071448	0.00904772	0.00766465	0.00730952	0.0050451	0.00914077	0.00695486	0.00808527	0.00632031	0.00813167	0.00489169	0.00882066	0.00529405	0.00707649	0.00667436	0.00721794	0.00482689	0.00837385	0.00684221	0.00766836	0.00499157	0.00790365	0.00592552	0.00864875	0.00719865	0.00856835	0.00661829	0.00810304	0.00485989	0.00878365	0.0069978	0.00811877	0.00404141	0.00849261	0.0067704	0.00749919	0.00678935	0.0083733	0.00646496	0.00757072	0.00702043	0.00848449	0.00601339	0.0078623	0.00780176	0.00823661	0.00707525	0.00822626
GGCACG	0.0106249	0.0107116	0.0106537	0.0104326	0.0107124	0.0106484	0.0107006	0.0105392	0.0106036	0.0105929	0.0106374	0.0105273	0.0106646	0.0105849	0.0105701	0.0104697	0.0104109	0.0106923	0.0102964	0.0104519	0.0102145	0.0105008	0.0108023	0.0104824	0.010815	0.0105327	0.0109479	0.0105739	0.0113831	0.0106494	0.0109548	0.0102968	0.0106335	0.0105394	0.0105829	0.0105617	0.010991	0.0105561	0.0103803	0.0104507	0.0106623	0.0105929	0.0111915	0.0105413	0.0104495	0.0103451	0.0107049	0.010762	0.010945
TGGCAC	0.0110618	0.0106655	0.0109915	0.0106693	0.0115772	0.0106545	0.010921	0.0105153	0.0112103	0.0107684	0.0107002	0.0105048	0.0107386	0.0105844	0.0108684	0.010469	0.0113634	0.0104495	0.0111304	0.0104367	0.0108452	0.0104827	0.0110886	0.0104478	0.0107909	0.0105456	0.0107691	0.0105857	0.0110704	0.010587	0.0109569	0.0102912	0.0121898	0.010516	0.01064	0.0105617	0.0109388	0.0105086	0.0106055	0.0103956	0.0106849	0.0107582	0.0109713	0.0105415	0.0104082	0.0105261	0.0112128	0.0107636	0.011769
CTGGCA	0.0103823	0.0104891	0.0106565	0.0104242	0.0105399	0.0106185	0.0105308	0.0104504	0.0105151	0.0105306	0.0104901	0.010477	0.01059	0.0105211	0.0103222	0.0104687	0.0103247	0.0104033	0.0102629	0.0103993	0.0104532	0.0104419	0.0106661	0.0104103	0.0106258	0.0104804	0.0104377	0.0104174	0.0107027	0.0105673	0.0103233	0.010268	0.0105526	0.0104448	0.0104401	0.010596	0.0107953	0.0104688	0.0102382	0.0104223	0.010511	0.0104866	0.0106883	0.0105514	0.0103414	0.0104877	0.0107313	0.0106707	0.0107604
GCTGGC	0.0104333	0.0105141	0.010681	0.0104507	0.010568	0.010668	0.0105308	0.0104665	0.0105372	0.0105492	0.0104904	0.0104716	0.0106252	0.0105458	0.0103944	0.0106246	0.0103542	0.0103986	0.0102629	0.0104078	0.0104279	0.0104884	0.0105933	0.0104312	0.0106941	0.0104844	0.0104929	0.0104179	0.0107027	0.010591	0.010448	0.0103317	0.0105526	0.0104542	0.0104635	0.0106306	0.0108471	0.0105129	0.0102262	0.010429	0.0104861	0.0105088	0.0106889	0.0105604	0.0104132	0.0105003	0.0107548	0.0107016	0.0107188
TGCTGG	0.0119699	0.0113625	0.0115243	0.010809	0.0128354	0.0108944	0.0117618	0.0108438	0.0127859	0.0111834	0.0121218	0.0105939	0.0114987	0.0106985	0.0114845	0.0109829	0.0116381	0.0109099	0.0117189	0.0105829	0.0119169	0.0105571	0.0130247	0.0112445	0.01321	0.0111029	0.0122875	0.0111434	0.0139252	0.0112448	0.0112833	0.0103165	0.0125797	0.010523	0.0114914	0.0107143	0.0137266	0.010641	0.0107152	0.0104979	0.0125902	0.0113271	0.0133655	0.0113751	0.0106235	0.0109365	0.0139106	0.0129986	0.0142599
GCTGCT	0.0104972	0.010701	0.0108466	0.0104462	0.0106118	0.0107564	0.0106698	0.0106909	0.0106625	0.010636	0.0107324	0.0104654	0.0106395	0.0106712	0.0104807	0.0106561	0.0103534	0.0104852	0.01036	0.0105047	0.0106074	0.010696	0.0105918	0.0107517	0.0109075	0.0105215	0.0107174	0.0105509	0.0107523	0.0109016	0.0105037	0.010296	0.0107519	0.010541	0.0104771	0.0106343	0.0109343	0.0105917	0.0102373	0.0105615	0.0105235	0.0105169	0.0109429	0.0107003	0.0105426	0.0105972	0.0107803	0.010874	0.0107578
GGCTGC	0.0111394	0.0115882	0.0108509	0.0109151	0.0113351	0.011049	0.010881	0.0117666	0.0112785	0.0115867	0.0107926	0.0110146	0.0112148	0.0115525	0.0118699	0.0106779	0.0128347	0.011755	0.0110649	0.0112594	0.0108401	0.0107355	0.0106803	0.0107104	0.0113894	0.0113482	0.0106608	0.0123905	0.0111027	0.0107759	0.0107686	0.0127155	0.0106707	0.0107507	0.0104964	0.0107689	0.0112951	0.0116225	0.0106763	0.0119357	0.0116931	0.0114276	0.0108487	0.0106266	0.010942	0.0113751	0.0111498	0.0117859	0.0103171
CGGCTG	0.0104247	0.0105182	0.0107059	0.0104311	0.0104959	0.0106725	0.0105646	0.0106286	0.0105685	0.0105424	0.0103481	0.0104088	0.0105102	0.0105722	0.0105175	0.010552	0.0104106	0.0105202	0.0103112	0.0104511	0.0105198	0.0104998	0.0103715	0.0106492	0.0105829	0.01047	0.0104798	0.0105374	0.0105971	0.0105703	0.0103827	0.0103308	0.0105973	0.0105148	0.0104773	0.0106342	0.010834	0.0104956	0.0102968	0.0104782	0.0105101	0.010543	0.0107017	0.010541	0.0105102	0.0104679	0.0106574	0.0106965	0.0103171
GCGGCT	0.0104763	0.0105068	0.0106568	0.0104048	0.0108156	0.0106564	0.0106429	0.0106384	0.0106267	0.0105472	0.0104773	0.0104253	0.0105974	0.0106235	0.0105383	0.0106141	0.0104466	0.0105518	0.0103112	0.0103815	0.0106839	0.0105007	0.0105133	0.0106986	0.0105914	0.0105277	0.0106767	0.0104629	0.0104596	0.010543	0.0104666	0.0102608	0.0105828	0.0104814	0.0105002	0.0106007	0.0108385	0.0104919	0.0103086	0.0104719	0.010509	0.0105776	0.0106559	0.0105752	0.0104829	0.0105226	0.0106441	0.0106988	0.0103587
CCGCGG	0.0102808	0.0104019	0.0105836	0.0102628	0.0104831	0.0105133	0.0104393	0.0102725	0.0104775	0.0103636	0.010323	0.0103299	0.0104075	0.0104675	0.0103333	0.0103337	0.0102086	0.0104781	0.0103436	0.0101653	0.0103644	0.0103577	0.0103167	0.0103822	0.0105923	0.0103418	0.0101459	0.0102455	0.0105516	0.010374	0.0104483	0.0100936	0.0104726	0.0103157	0.0102824	0.0103975	0.010591	0.0103949	0.0103578	0.0103585	0.0101706	0.0104285	0.0104839	0.0104286	0.0103268	0.0104087	0.0104937	0.0105822	0.0102353
ACCGCG	0.0102967	0.0103874	0.0106805	0.0102703	0.0105781	0.0104947	0.0105019	0.0102636	0.010503	0.0103801	0.0104439	0.0103658	0.010351	0.0105422	0.0103337	0.0105612	0.0102086	0.0105442	0.0106984	0.0101838	0.0111498	0.0103581	0.0103996	0.0103752	0.0106199	0.0103245	0.0101664	0.01023	0.0108074	0.0104036	0.0105213	0.0101225	0.0105237	0.0103255	0.0102885	0.0104312	0.0107085	0.010413	0.0104649	0.0103783	0.0102394	0.0104916	0.0105841	0.0104832	0.0103895	0.010421	0.0108038	0.0106041	0.0105259
TACCGC	0.0103035	0.0104513	0.0105839	0.0103965	0.0110375	0.0104952	0.0106491	0.0103132	0.0104682	0.0104031	0.010662	0.0103599	0.0103762	0.010535	0.0107892	0.010499	0.0101798	0.0105593	0.0103559	0.0101404	0.0112137	0.0103397	0.0104511	0.0104446	0.0106632	0.0103701	0.0102767	0.0103529	0.0111659	0.0104132	0.010674	0.0101401	0.0105882	0.0103393	0.0103797	0.0104984	0.0110407	0.0105059	0.0103943	0.0103311	0.0106137	0.0104348	0.0106419	0.0104488	0.0103002	0.0104258	0.0110115	0.0107345	0.010542
TTACCG	0.0103316	0.0103766	0.0105835	0.0103327	0.0105163	0.0107121	0.0106272	0.0103682	0.0107101	0.0104749	0.0104459	0.0104356	0.0103521	0.0105439	0.0103268	0.0104968	0.0103819	0.0106032	0.0103378	0.0101912	0.0105472	0.0106609	0.0102593	0.0105724	0.0105998	0.010446	0.0101288	0.0102164	0.0105139	0.0105217	0.0104296	0.0101809	0.0105716	0.0105672	0.0102452	0.0105309	0.0105712	0.0104933	0.0103209	0.0105841	0.010213	0.0105518	0.0104055	0.010558	0.0104905	0.0104208	0.0103558	0.0106933	0.010169
ATTACC	0.0103665	0.0103543	0.0106317	0.0102804	0.0104603	0.0105567	0.0102674	0.0103531	0.0105467	0.0103657	0.0104451	0.0103419	0.0103167	0.0104905	0.0103141	0.010466	0.0103244	0.0105145	0.0103383	0.0102089	0.0104945	0.0103789	0.0102652	0.0104473	0.0107459	0.010317	0.0102879	0.0102614	0.0106064	0.0103958	0.0104294	0.0101747	0.0105544	0.010441	0.0102634	0.010578	0.0106878	0.0103897	0.0102846	0.0103595	0.0102222	0.0105147	0.0104947	0.0104271	0.0103313	0.0103532	0.0103908	0.0106676	0.0101332
CCTAGG	8.84358e-05	7.26485e-05	0	7.38073e-05	3.40706e-05	0.00011499	0	6.5373e-05	6.84811e-05	0.000120458	4.24316e-05	8.50454e-05	5.93938e-05	4.65908e-05	3.78243e-05	6.42354e-05	2.91677e-05	3.79886e-05	8.36578e-05	3.44056e-05	3.47123e-05	5.09399e-05	4.74724e-05	0.000178201	9.12769e-05	2.31997e-05	7.52649e-06	7.18544e-05	0.000144153	0.000214656	1.92742e-05	4.64181e-05	0.000151869	6.72711e-05	9.96854e-05	0.000147172	6.97634e-05	3.59486e-05	0.000131156	3.47691e-05	9.28973e-05	0.000104514	0.00014847	0.000114815	5.41314e-05	8.78649e-05	5.84237e-05	9.11656e-05	0.00012025
CCCTAG	9.53055e-05	5.78358e-05	0	7.38073e-05	2.79355e-05	0.000114862	0	8.08559e-05	0.000126028	0.000222842	4.24316e-05	8.50454e-05	7.70104e-05	5.3474e-05	3.61789e-05	6.42354e-05	2.91677e-05	3.79886e-05	8.36578e-05	4.32483e-05	0.000137814	6.1721e-05	8.21548e-05	0.000126603	9.12769e-05	2.25597e-05	7.52649e-06	8.90567e-05	0.000194416	0.000214706	2.96072e-05	5.79931e-05	0.000272649	3.96745e-05	0.000109841	0.000147172	7.50683e-05	4.51596e-05	0.000107202	3.47691e-05	8.50747e-05	0.000104514	0.000200909	0.000114815	5.82695e-05	8.78649e-05	5.84237e-05	9.42757e-05	0.00012025
CTCCCT	0.00039714	0.000648241	0.000718367	0.000880771	0.000367044	0.00023904	0.000287107	0.000906357	0.000503084	0.000818136	0.000344637	0.000358522	0.000192747	0.000141289	0.000695284	0.000704693	0.000236601	0.00208654	0.000263861	0.000830084	0.000943076	0.000530086	0.000805324	0.000643225	0.000422751	0.000458543	0.000294034	0.000383457	0.000725213	0.000568915	9.9011e-05	0.000105334	7.67964e-05	0.000261438	0.000349201	0.000136909	0.00107529	0.00121493	0.00139467	0.00036968	0.000703807	0.00146707	0.000820429	0.000242139	0.000378728	0.000654075	0.000350943	0.000856466	0.000193869
ACAACA	0.00176039	0.00325972	0.00178632	0.00387027	0.00159916	0.00164924	0.00167137	0.00202103	0.00214907	0.00224657	0.00121869	0.00267181	0.00163209	0.00177252	0.00229845	0.00247786	0.00186779	0.00234427	0.00470064	0.00451354	0.00205591	0.00280511	0.00146854	0.00273804	0.00270725	0.00456407	0.00152889	0.00398504	0.00215547	0.00234281	0.00246543	0.00647293	0.00187233	0.00143143	0.00523958	0.00292107	0.00156822	0.00317874	0.00398953	0.0024378	0.00254105	0.00257496	0.00206414	0.00347765	0.00514784	0.00453239	0.00201486	0.00343085	0.0027099
TACAAC	0.0083887	0.0080392	0.00774964	0.00869306	0.0070722	0.00960365	0.00713821	0.00832081	0.00704557	0.00846403	0.00728375	0.00876954	0.00690313	0.00941743	0.00774203	0.00877153	0.00926066	0.00722245	0.00715301	0.00850508	0.0069613	0.00947049	0.00642973	0.0086009	0.00659976	0.00831699	0.00818531	0.00858875	0.00600067	0.0091742	0.00730317	0.00965272	0.00694152	0.00906936	0.00662057	0.00790158	0.00430467	0.00847624	0.00759594	0.00975578	0.00716848	0.007189	0.00521751	0.00903336	0.00865189	0.00852357	0.00626009	0.00655971	0.00642815
TTACAA	0.00944501	0.00938922	0.00860857	0.00990249	0.00888304	0.00981418	0.00866219	0.00934244	0.0095184	0.00977636	0.00970906	0.00966501	0.00787204	0.00968777	0.00932178	0.00978924	0.0102759	0.00961673	0.00837415	0.00940761	0.00942882	0.00999165	0.00885359	0.00967481	0.00848765	0.00901957	0.00964995	0.00927904	0.0088035	0.0100244	0.00771023	0.00971898	0.0096744	0.00987374	0.00819604	0.00814139	0.00795378	0.00979558	0.00920437	0.0101584	0.00854725	0.00920075	0.00793287	0.00957655	0.00913703	0.00930763	0.00938412	0.008835	0.0101923
CTTACA	0.00213063	0.00261454	0.00113453	0.00368071	0.00127508	0.00142086	0.00154542	0.00140993	0.00208057	0.00194413	0.00198103	0.00205069	0.00158886	0.00139905	0.00214284	0.00223231	0.00211052	0.00212414	0.00323562	0.00382284	0.00234032	0.00270877	0.00177593	0.00253256	0.00222554	0.00382044	0.00184745	0.00380613	0.00176872	0.0023152	0.0023463	0.00605562	0.00231432	0.00127008	0.00429496	0.00120641	0.00103571	0.00288965	0.00317831	0.00245311	0.00259768	0.00215559	0.00206207	0.00303056	0.0041673	0.00404175	0.0025431	0.00283956	0.00333528
CTCTTA	0.00165507	0.00231196	0.00101854	0.00329741	0.00099751	0.00116089	0.00122377	0.00111578	0.00161702	0.0015792	0.00102952	0.00182245	0.00104332	0.0012944	0.00179478	0.00191931	0.00155012	0.0017018	0.00276046	0.00359446	0.00142395	0.000937474	0.00137742	0.0013871	0.00192993	0.00352214	0.00125938	0.00354337	0.00143458	0.000916603	0.00208239	0.00594507	0.00103301	0.000971299	0.00371679	0.000602149	0.000729281	0.00245601	0.00288506	0.00159995	0.00230488	0.00198262	0.00172153	0.00206229	0.00388713	0.00385134	0.00186382	0.00265223	0.00219871
CAGTTA	0.000186028	0.000535106	0.000659446	0.000236557	0.000534866	0.000353636	0.000633864	0.000341258	0.000441584	0.000384237	0.000230966	0.000482862	0.000408957	0.000377052	0.000371114	0.000435194	0.000317371	0.000278336	0.00134698	0.000673729	0.000332907	0.000129353	0.000242628	0.000166302	0.000478161	0.000374431	6.77472e-05	0.000174849	9.01104e-05	5.62875e-05	0.000160893	0.000301718	0.000808879	0.000180983	0.00116625	0.000773839	0.000443076	0.000317779	0.00108082	0.00026034	0.000281622	0.000428365	0.000278688	0.000207587	0.0007844	0.000243807	0.000152171	0.000257233	0.000362332
GCAGTT	0.000610465	0.00185868	0.00048198	0.0015297	0.00188094	0.00538848	0.00125636	0.00199134	0.00118441	0.00266267	0.00155934	0.00489835	0.00102021	0.00433452	0.00131055	0.00309976	0.000590353	0.00254415	0.000919726	0.00195794	0.00137528	0.00490266	0.00160223	0.00412484	0.000813491	0.00212056	0.00199554	0.00170478	0.00147892	0.00526401	0.000843832	0.000751035	0.00211406	0.00636815	0.00143254	0.00411264	0.00211063	0.00133581	0.00038661	0.00219762	0.00119425	0.00130783	0.00194205	0.00445189	0.00170904	0.00112363	0.00157277	0.00156123	0.00208562
CGCAGT	8.51246e-05	3.3858e-05	7.84874e-05	5.27007e-05	5.03835e-05	6.83364e-05	5.83117e-05	4.17656e-05	3.31783e-05	5.16809e-05	6.57394e-05	5.00755e-05	0	3.11597e-05	0	0	2.87167e-05	1.371e-05	1.57958e-05	4.23901e-05	2.24247e-05	3.3078e-05	5.98866e-05	0.000119119	0	1.91023e-05	3.10352e-05	1.2474e-05	0	0.000130163	3.70641e-05	2.89215e-05	7.77705e-05	2.36882e-05	6.13931e-05	3.33e-05	4.86511e-06	1.73064e-05	3.5714e-05	4.01057e-05	5.16673e-05	2.85864e-05	5.58195e-05	2.20733e-05	5.33967e-05	1.67507e-05	4.72222e-05	3.90595e-05	0
ACGCAG	0.000815693	0.0010756	0.000297165	0.000526163	0.00102783	0.00043599	0.000470733	0.00120875	0.000692301	0.00093568	0.000211493	0.000605788	0.000697907	0.00105174	0.00152969	0.00040853	0.00245242	0.00120343	0.00081787	0.000887812	0.000499453	0.000272971	0.00042307	0.000233265	0.000880654	0.000884332	0.00027211	0.00112962	0.000501404	0.000269564	0.000525021	0.00132358	0.000122332	0.000288233	0.000282881	0.000168226	0.000550578	0.0011406	0.000473918	0.00149026	0.0012577	0.000911946	0.000274063	0.000121378	0.000534146	0.000819202	0.000470932	0.00102615	8.30038e-05
CACGCA	0.000142272	0.000339309	0.000247843	0.000185348	0.000384963	5.89431e-05	0.00024182	0.000195541	0.000323117	0.000245468	0.000441808	0.000302244	4.09921e-05	5.25937e-05	0.000379651	0.000249278	0.000317075	6.26983e-05	0.0012346	0.000341415	0.000255013	3.95304e-05	0.000146886	6.47987e-05	0.00019	0.000321578	0.000232055	0.000217002	4.48229e-05	1.40363e-05	3.62398e-05	0.000278597	0.00108466	0.000162477	0.000461373	0.000168226	0.000345998	4.77151e-05	0.000604417	8.71347e-05	0.000149232	0.000272498	0.000192472	4.36784e-05	0.00057914	8.478e-05	0.000106263	0.000127338	0.000258778
GCACGC	0.000712744	0.00188842	0.000679145	0.00156729	0.00192759	0.00550085	0.00120045	0.00207234	0.00127597	0.00274279	0.00171605	0.0050129	0.00117277	0.00445053	0.00126693	0.00313388	0.000532771	0.00269701	0.000839519	0.00196681	0.00140963	0.00496259	0.00160822	0.00418557	0.000863295	0.00216757	0.00228789	0.00185573	0.00157143	0.00539994	0.000916584	0.000780761	0.00284098	0.00654035	0.00143617	0.00418154	0.0021944	0.00137477	0.000308219	0.00225446	0.00114511	0.00132001	0.00203688	0.00461967	0.00176897	0.00112769	0.00163255	0.00163337	0.00208562
CACTGC	0.00842577	0.00717102	0.00855402	0.00639335	0.00879799	0.00885402	0.00882045	0.00848073	0.00850955	0.00824083	0.00913995	0.00776515	0.00868117	0.00871713	0.00804165	0.00801865	0.00831288	0.00814002	0.00558156	0.00579072	0.00852966	0.00751451	0.00890701	0.0074527	0.00799932	0.00592034	0.00890473	0.00639372	0.00908504	0.00795174	0.00778561	0.00388234	0.00838548	0.00899061	0.0050217	0.00764536	0.00922561	0.0073328	0.00595854	0.00796402	0.00782694	0.00789871	0.00835224	0.00701147	0.00527422	0.00582733	0.00852435	0.00716911	0.00760391
CCACTG	0.00767515	0.00476835	0.00750929	0.00412583	0.00636125	0.00336868	0.00736956	0.00565677	0.00673185	0.00492056	0.00725538	0.00257506	0.00755858	0.00424815	0.00605021	0.00437644	0.00760402	0.00351201	0.00447686	0.00304459	0.00565602	0.00213185	0.00670496	0.00291128	0.00683641	0.00334531	0.00684777	0.00438809	0.00650503	0.00253175	0.0067667	0.00311263	0.0061127	0.00233603	0.00326455	0.00342789	0.00568572	0.00474011	0.00484751	0.0054981	0.00601787	0.00526871	0.00601092	0.00256409	0.00317559	0.00420507	0.0061254	0.00456966	0.00519052
CCCACT	0.00772717	0.00481129	0.00755874	0.0041618	0.00645328	0.00340047	0.00746588	0.0056475	0.00675593	0.00487495	0.0072346	0.00257542	0.00756661	0.00430612	0.00626545	0.00443836	0.00772207	0.00359022	0.0044771	0.0030698	0.00588709	0.00215378	0.00671925	0.00300287	0.00695911	0.00349457	0.00684603	0.00444752	0.00640302	0.00256635	0.00683132	0.00311831	0.00609418	0.00234546	0.00328922	0.00339493	0.00576713	0.0047975	0.00485934	0.00551142	0.00608418	0.00531468	0.00606618	0.00257552	0.00318447	0.00437811	0.00618661	0.00458615	0.0052628
CCCCAC	0.00849768	0.00490246	0.0103318	0.00483727	0.00687509	0.00358741	0.00791598	0.00570677	0.00703253	0.00496616	0.00848249	0.00273917	0.00836792	0.00440035	0.00640924	0.00440324	0.00786563	0.00373275	0.00465679	0.00319835	0.00589168	0.00259282	0.00662288	0.00304522	0.00755002	0.00349186	0.00714636	0.00454061	0.00681879	0.00277911	0.00774601	0.00317069	0.00625518	0.00296709	0.00352562	0.0034941	0.00589798	0.00481579	0.00496639	0.00559948	0.00613339	0.00531741	0.00644647	0.00275379	0.00326274	0.00449226	0.00663746	0.00463271	0.00592981
TCCCCA	0.00789134	0.00561882	0.00781159	0.00478985	0.00669067	0.00778127	0.00758015	0.00641229	0.00676845	0.00575828	0.00756984	0.0049442	0.00782067	0.00755199	0.00633605	0.00600159	0.00771681	0.00517433	0.00453983	0.00453682	0.00571217	0.00638682	0.00654988	0.00563426	0.0071666	0.00468789	0.00715902	0.00490489	0.00624135	0.0067131	0.00682013	0.00339133	0.00622264	0.00691258	0.00349661	0.00549402	0.00608547	0.00558083	0.00492887	0.00712114	0.00612394	0.00540193	0.00664951	0.00589118	0.00415449	0.0047384	0.00631025	0.00480123	0.00515175
GGAAGA	0.00587765	0.00504013	0.00383568	0.00388438	0.00623628	0.00376602	0.0055814	0.00617683	0.00637248	0.00581798	0.00778571	0.0039471	0.00444329	0.00441816	0.00523537	0.00498311	0.00526712	0.00337012	0.00726383	0.00363662	0.00661629	0.00264704	0.00873702	0.00371485	0.00732032	0.00347936	0.00993421	0.00385085	0.00691622	0.00341077	0.00453596	0.00114022	0.00883121	0.00561561	0.00658056	0.00694266	0.0083337	0.00412911	0.00485304	0.00474462	0.00676982	0.00615182	0.00751266	0.00312553	0.00407451	0.00429693	0.00691151	0.00594693	0.00802655
CGGAAG	0.00355542	0.00442653	0.0022666	0.00455335	0.00389913	0.00510173	0.00372519	0.00298299	0.00297237	0.0036817	0.00445742	0.00430687	0.00318028	0.00425575	0.00314949	0.00474759	0.00242836	0.00258271	0.00572947	0.00582801	0.00253601	0.00357333	0.00290095	0.00371897	0.00370294	0.00569093	0.00306848	0.00447569	0.0027313	0.00493879	0.00343576	0.00580267	0.00542322	0.00623874	0.00589853	0.00482485	0.00343701	0.00362121	0.00313658	0.0031308	0.00306913	0.00304967	0.00352472	0.00558573	0.00551023	0.00424633	0.00327744	0.00425824	0.0044179
GCGGAA	0.00272986	0.00151824	0.000954243	0.00111158	0.00223561	0.00133474	0.00256371	0.00107699	0.00104748	0.00103102	0.00247739	0.00149471	0.00228577	0.0016929	0.00146716	0.000992618	0.00126503	0.000598819	0.00240643	0.00110036	0.00132125	0.0013508	0.00145642	0.00119572	0.00146935	0.00141126	0.000634276	0.000647809	0.000586503	0.00109721	0.00140887	0.000482245	0.002252	0.00233972	0.00217446	0.00242307	0.0020069	0.000643429	0.00180231	0.000878172	0.000997814	0.00112377	0.00167846	0.00103483	0.00124276	0.000873866	0.00110212	0.00104706	0.00154717
TGCGGA	0.00225588	0.00141948	0.000798994	0.000985396	0.00169791	0.0012861	0.00241264	0.00099743	0.00102512	0.000949473	0.00241372	0.000954287	0.00216271	0.00158175	0.00119877	0.000992618	0.00126503	0.000548449	0.00233808	0.00103948	0.000730734	0.00116654	0.00127177	0.00106366	0.00134942	0.00133611	0.000350446	0.000502799	0.00035928	0.00103917	0.00136219	0.000429189	0.002252	0.00178205	0.00211563	0.00231945	0.00148637	0.000567817	0.00179037	0.00066629	0.00096445	0.000844261	0.00154952	0.000957634	0.00119301	0.000750549	0.000596564	0.000820039	0.00111858
TTGCGG	0.00225588	0.00143364	0.000798994	0.000985396	0.00177805	0.00130644	0.00243198	0.00100227	0.00109422	0.000948812	0.00247983	0.000959615	0.00224556	0.00163287	0.00131188	0.000961499	0.00135554	0.000576199	0.00233808	0.00106474	0.000949808	0.00116308	0.00141143	0.0011093	0.00136536	0.00139526	0.000380954	0.000520408	0.00035928	0.00105966	0.0014183	0.000429189	0.00225283	0.00178693	0.00211563	0.00231945	0.0015366	0.000567817	0.00170718	0.000659003	0.000972894	0.00088488	0.00156984	0.000980356	0.001198	0.00073539	0.000583363	0.000828646	0.00111858
ATTGCG	0.00386524	0.00360514	0.00143002	0.00202927	0.00367531	0.00216409	0.00313021	0.00345998	0.00241829	0.00283069	0.00300631	0.00212654	0.00349986	0.0036586	0.00423133	0.00165376	0.00608416	0.00292812	0.00395795	0.00282363	0.00169647	0.00169104	0.00220867	0.00150883	0.00312665	0.00317139	0.00109657	0.00290027	0.00136209	0.00154579	0.00245085	0.00300095	0.00313069	0.00235866	0.00265094	0.00262243	0.00264943	0.00286405	0.00263238	0.00335882	0.00342956	0.00263506	0.0021097	0.00117603	0.00227086	0.00225316	0.00147731	0.00281472	0.00123881
TCCATT	0.00308228	0.0044838	0.00193098	0.00478394	0.00300449	0.00557399	0.0035258	0.00308324	0.00282671	0.00369847	0.00383125	0.00565351	0.00345353	0.00443146	0.00259068	0.00528693	0.00186749	0.00327158	0.00453244	0.00601199	0.00328268	0.00360774	0.00318895	0.00462507	0.00410619	0.00608561	0.00191806	0.00495403	0.00326453	0.00548623	0.00371637	0.00675513	0.00308103	0.00671806	0.00654	0.00417462	0.00272531	0.00400405	0.00287307	0.00320837	0.00427795	0.00329358	0.00333155	0.00634423	0.00609137	0.00513694	0.00305061	0.00424493	0.00341101
GTCCAT	0.00305475	0.00425022	0.0018577	0.00457843	0.00288379	0.00538931	0.0033936	0.00284935	0.00271994	0.00333486	0.00372302	0.00548161	0.00340604	0.00419338	0.00250518	0.00491233	0.00186749	0.00307219	0.00448497	0.0058217	0.00231019	0.00351407	0.00300876	0.00420646	0.00404834	0.00586337	0.00186347	0.0045415	0.00296159	0.00529148	0.00324143	0.00672045	0.00280679	0.00655223	0.00599392	0.00389867	0.00241953	0.00384084	0.00292109	0.00298167	0.0039974	0.0030059	0.00299252	0.00606127	0.00582978	0.00488773	0.00271809	0.00406038	0.00320576
CGTCCA	0.00275726	0.00403046	0.00183053	0.00456832	0.00246014	0.00522366	0.00332866	0.00270123	0.00244404	0.00316551	0.00310437	0.00541557	0.00319282	0.00407278	0.00236282	0.00484249	0.00186749	0.0029093	0.00441091	0.00575333	0.00192463	0.00345782	0.00198012	0.00391654	0.00312036	0.00556352	0.00140452	0.00423279	0.00198889	0.00522193	0.00305423	0.0067058	0.00271862	0.00655476	0.00541111	0.00377951	0.00170406	0.00376207	0.00288124	0.00298167	0.00237815	0.00268712	0.00272993	0.00577757	0.00578507	0.00465029	0.00208574	0.00346694	0.00267095
TCGTCC	0.00448409	0.0014918	0.00286636	0.00165234	0.00265745	0.00205768	0.00417933	0.000822231	0.00162228	0.00110597	0.00529053	0.00136186	0.00453095	0.00240423	0.00171888	0.00118208	0.0018722	0.000812591	0.00104207	0.000604479	0.000588837	0.00207152	0.00233852	0.0020901	0.00281144	0.00168633	0.000693789	0.000837689	0.000817728	0.00236688	0.00255779	0.00115265	0.00244572	0.00331165	0.00301404	0.0010406	0.00173096	0.000685629	0.00146847	0.000773414	0.00141282	0.000700344	0.00231141	0.00148466	0.000893179	0.00123213	0.00112724	0.000628388	0.0020035
CTCGTC	0.000168536	0.000321639	2.48558e-05	1.70839e-05	0.000150611	0.000201986	0	0.000154495	0.0001762	0.000258898	0.000337405	0.000266573	0.000203089	0.000249099	0.000138137	6.08301e-05	5.75821e-05	0.000133287	4.80413e-05	1.70439e-05	0.000133208	1.97164e-05	5.88172e-05	3.57174e-05	0.000371977	0.000267196	0.000112469	0.000909029	0.00045032	0.000350848	4.44354e-05	0.000964169	0	0.000228327	1.01582e-05	0	0.000332318	0.000188617	3.59622e-05	2.23328e-05	0.00011425	0.000106889	0.000168762	0.000291688	9.07736e-05	0.000122284	0.000270505	0.00053987	3.56786e-05
TCTCGT	6.39452e-05	0.000132167	7.32796e-05	1.79377e-05	6.8448e-05	0.000573742	1.91336e-05	0.000389626	4.53542e-05	0.000224297	6.43297e-05	0.000233654	3.34052e-05	0.000347824	0.000157805	3.17778e-05	0	0.000235272	4.94039e-05	1.74972e-05	0.000144587	0.000261974	6.54145e-05	0.000201955	5.04623e-05	0.000232059	7.4489e-06	0.000144912	4.50552e-05	0.000302407	3.67154e-05	4.68807e-05	3.13352e-05	0.000542532	3.1098e-05	0.000587179	0.000473479	0.000129095	1.21999e-05	1.37003e-05	9.97948e-05	0.000113698	0.00023002	0.000280378	5.47214e-05	0.000108196	5.98536e-05	9.65931e-05	0.000110826
CTCTCG	0.000313661	0.00111816	0.00059694	0.000747232	0.000953813	0.00190018	0.000577996	0.00101533	0.00056857	0.00116888	0.000695793	0.0022988	0.000442137	0.00228214	0.000900943	0.000830976	0.00020759	0.00315837	0.000115189	0.000612457	0.000899952	0.00289107	0.000896271	0.00206423	0.000526385	0.000818628	0.000108158	0.000598024	0.00116	0.00217105	0.000382932	0.000214072	0.000297857	0.00220379	0.000636826	0.00131757	0.00170198	0.00146967	0.00124146	0.000917956	0.000745816	0.00184312	0.00068525	0.00123558	0.00088239	0.00102629	0.000700092	0.00125913	0.000264037
GACTCT	0.000481265	0.000663833	9.8389e-05	0.000880485	0.000532605	0.000218642	0.000292466	0.000525156	0.000624473	0.000671497	0.000789433	0.000350737	0.000311105	0.000222109	0.000615719	0.000290495	5.74348e-05	0.00149945	0.000185854	0.000753954	0.000510594	0.000358532	0.00100279	0.000383055	0.000992563	0.000464353	0.000511045	0.000394145	0.00115656	0.00032578	0.000250026	4.14489e-05	6.67049e-05	0.000323776	0.00074976	3.43572e-05	0.00115496	0.00102718	0.000852327	0.00018457	0.000471577	0.000694755	0.000467728	0.000323664	0.000175154	0.000346536	0.000862289	0.00073412	0.000608059
AGACTC	0.000342575	0.00021273	2.48558e-05	8.27388e-05	0.000498344	0.000152146	0.000118488	8.99781e-05	0.000284454	0.000101357	0.0006811	0.00012863	0.000218309	0.000173705	0.000244322	3.49186e-05	2.85694e-05	0.000131246	0.000119982	6.26247e-05	0.000373913	2.29257e-05	0.000844671	0.000204419	0.000941394	0.000241071	0.000488143	0.000197563	0.00101805	0.000272948	0.00024998	1.78695e-05	8.18879e-05	0.000114323	0.00055953	6.69434e-05	0.000780884	0.000114475	1.33348e-05	6.53721e-06	0.00039527	6.72222e-05	0.000426932	0.000289975	5.99112e-05	7.04397e-05	0.000705502	0.000515734	0.000606909
CAGACT	0.00308287	0.00433025	0.00183348	0.00463803	0.00290842	0.0054482	0.00343099	0.00291133	0.00276437	0.00337394	0.00374369	0.00545955	0.0034373	0.00421648	0.00253234	0.00506777	0.00181006	0.00309885	0.00454849	0.00588902	0.00227383	0.00352814	0.00304962	0.00423658	0.00408081	0.00593261	0.00187832	0.00456158	0.00319806	0.00535781	0.00333053	0.00672572	0.00285226	0.00657475	0.0060266	0.00389816	0.00244625	0.00385693	0.00292073	0.00303664	0.00409631	0.00301146	0.00305976	0.00617027	0.00585152	0.00493604	0.002765	0.00409497	0.00331411
TCAGAC	0.00739612	0.00703698	0.00382092	0.00745777	0.00395981	0.00564854	0.00570027	0.00753448	0.00566524	0.00573027	0.00669762	0.00727893	0.0045774	0.00496413	0.00636931	0.00746138	0.00637248	0.00461206	0.00686081	0.00725958	0.00756624	0.00370058	0.00746236	0.00570362	0.00670722	0.00650258	0.00902013	0.00568242	0.00599115	0.00564326	0.00658484	0.00724793	0.00364718	0.00661669	0.00635391	0.0049206	0.00318587	0.00671891	0.00838105	0.00601921	0.00839348	0.00675629	0.00430176	0.00652005	0.00771438	0.00637433	0.00500025	0.00469266	0.00451005
GTCAGA	0.00260919	0.00301453	0.00152062	0.00380793	0.00201483	0.00207092	0.00315566	0.00161146	0.0021248	0.00217645	0.00272965	0.00238851	0.00266698	0.00235221	0.00208982	0.00263314	0.00181006	0.00207368	0.00447416	0.00428268	0.00151443	0.00183449	0.00167958	0.00210363	0.00294106	0.00431175	0.00109592	0.00342884	0.00156928	0.00179575	0.00273111	0.00612593	0.00246339	0.00243194	0.00532074	0.00174665	0.00139147	0.00278962	0.00285428	0.001907	0.00227026	0.00230351	0.00193892	0.00247747	0.00476421	0.00422477	0.0017704	0.00298804	0.00255917
CGTCAG	0.00343955	0.0026436	0.00181783	0.00157315	0.00320681	0.00172173	0.00308936	0.00226882	0.00240444	0.00206092	0.00277339	0.00157597	0.00320443	0.00264381	0.00275599	0.00127667	0.00406489	0.0017693	0.00368692	0.00206347	0.00170797	0.00143571	0.00196335	0.0013396	0.00251855	0.00227761	0.00207044	0.00191261	0.000995857	0.00130925	0.00251441	0.00177036	0.00312339	0.002071	0.00253607	0.00242056	0.00221166	0.00179976	0.00226459	0.0021691	0.00218043	0.00181273	0.00208427	0.0011253	0.00177631	0.00166265	0.00124105	0.00184796	0.00137779
TCCGTC	0.0027768	0.00418583	0.00179004	0.0043727	0.00254922	0.00505074	0.00340073	0.00281947	0.00225932	0.00315484	0.00320692	0.00413529	0.00296819	0.00413728	0.00248766	0.00443125	0.00192522	0.00248586	0.00497171	0.00561233	0.00171421	0.00343281	0.00174177	0.00352251	0.00304375	0.00565973	0.00131281	0.00393259	0.0019834	0.00491427	0.00314053	0.00579099	0.00297792	0.00593459	0.00503585	0.00482145	0.00221229	0.00354633	0.00289308	0.00296039	0.00229082	0.00266779	0.0026925	0.00553101	0.00544312	0.00415526	0.00201623	0.00358808	0.00266883
CTCCGT	0.00362544	0.00385058	0.00212867	0.00253715	0.00436401	0.00216227	0.00341809	0.00339163	0.0031819	0.00356808	0.00444441	0.00259989	0.00353772	0.00309425	0.00415829	0.0022698	0.00451522	0.00405037	0.00414549	0.00294383	0.00270039	0.00219602	0.00372503	0.0021754	0.00331216	0.00282267	0.00239432	0.0034359	0.00266267	0.00196042	0.00249279	0.00319494	0.00483251	0.00282993	0.00380281	0.00266109	0.00429857	0.0031731	0.00379829	0.00266107	0.00366302	0.00414921	0.00325186	0.00135404	0.00240626	0.00248226	0.00251669	0.00387887	0.00306262
GCTCCG	0.00229483	0.00148502	0.00093741	0.00101541	0.00199897	0.00131346	0.00243564	0.00101332	0.0010882	0.000971439	0.00248659	0.000953733	0.00240546	0.00168184	0.00123087	0.000994402	0.00129375	0.000578733	0.00235404	0.00103287	0.00078849	0.0012603	0.00151867	0.00111253	0.00160133	0.00140303	0.000538873	0.000549831	0.000454955	0.00115681	0.00157757	0.000475517	0.00242074	0.00185858	0.00231387	0.00231945	0.00163539	0.00059453	0.00182578	0.000652076	0.000976058	0.000872762	0.00182771	0.000969816	0.00121149	0.000799087	0.000636791	0.000900242	0.00116572
TGCTCC	0.00235048	0.0016239	0.000979409	0.00104789	0.0020967	0.00141025	0.00289084	0.00115923	0.00149797	0.00108613	0.00288361	0.000970297	0.00253104	0.00164726	0.00133072	0.00102853	0.00173656	0.000624412	0.00250106	0.00107345	0.000932823	0.0012664	0.00131833	0.00129752	0.00159077	0.00141473	0.000459841	0.000604688	0.000591853	0.00138384	0.00182652	0.000552234	0.00247241	0.00179584	0.00231944	0.00249124	0.00168855	0.000695035	0.0020948	0.000706559	0.00105068	0.000874334	0.001699	0.00119669	0.00134598	0.000817395	0.00070071	0.000988234	0.00111914
ATCACT	0.00215715	0.000660383	2.40871e-05	0.000627722	0.00104289	0.000992476	0.00187204	0.000474157	0.000715973	0.000592709	0.00205667	0.000326174	0.00173186	0.00126908	0.00123731	0.000526948	0.00276563	0.00067341	0.000526319	0.000279351	0.000198914	0.00104843	0.000901834	0.000784362	0.000897383	0.000620576	5.22195e-05	0.000299791	0.000134469	0.000923331	0.000845967	4.61794e-05	0.00119925	0.00167444	0.00100435	0.000537292	0.000641234	0.000165146	0.00067402	0.000439511	0.00096393	0.000244016	0.000688877	0.000478521	0.000226952	0.000197297	0.000210993	0.000178614	0.000611871
CATCAC	0.00293603	0.00115767	0.000482566	0.000890192	0.00207077	0.000903453	0.00226343	0.000470463	0.00135697	0.000676938	0.00256082	0.000437673	0.00185322	0.00110908	0.00104732	0.000433428	0.00187121	0.000201871	0.00126568	0.000296483	0.0011454	0.00100521	0.00124604	0.000804859	0.00110302	0.000703204	0.000298808	0.000454189	0.000690025	0.00100338	0.00147798	8.65871e-05	0.00277189	0.00156059	0.00112218	0.000503647	0.000896511	0.00023045	0.00100562	0.00035198	0.000715677	0.000348595	0.000891098	0.000478521	0.000253543	0.000218805	0.00120955	0.000892344	0.00187131
TCATCA	0.00519541	0.00247211	0.00174929	0.00302879	0.00301514	0.00104954	0.00357177	0.00299961	0.00316584	0.00266553	0.00469955	0.00156549	0.00249831	0.00168661	0.00331364	0.00261639	0.00444714	0.00124505	0.0030018	0.00131476	0.00326432	0.00119365	0.00443625	0.00174623	0.00269362	0.00103074	0.00463457	0.00114697	0.00260751	0.00116251	0.00342208	0.000504665	0.00465047	0.00160809	0.00211603	0.00148167	0.00155605	0.00234636	0.00392524	0.00258073	0.00345077	0.00305291	0.00227342	0.000773244	0.00192878	0.00163744	0.00262702	0.00126391	0.00402746
GTCATC	0.00575992	0.00518515	0.00596109	0.00533639	0.0050528	0.00762355	0.00516661	0.00636365	0.00456835	0.00616676	0.00640536	0.0059102	0.00452131	0.00673842	0.00500872	0.00695804	0.0049586	0.00525019	0.00343741	0.00466534	0.00525757	0.00634926	0.00637895	0.00628916	0.00410432	0.00368519	0.00587749	0.00284486	0.00542894	0.00572542	0.0046174	0.00126001	0.00654594	0.00506267	0.00344917	0.00582212	0.00410789	0.00581208	0.00542885	0.00582024	0.00603502	0.00575096	0.00402177	0.00574733	0.00409452	0.00421615	0.00473514	0.00340374	0.0048419
CGTCAT	0.0060118	0.00498434	0.00553022	0.00471868	0.00552516	0.00781241	0.00546712	0.00593533	0.00448731	0.00592976	0.00703772	0.00571561	0.00505424	0.00690159	0.00474303	0.00659268	0.00475117	0.00393305	0.00363524	0.00404957	0.00486085	0.00647465	0.00675746	0.00633444	0.00514201	0.00381149	0.00662901	0.00353949	0.00662576	0.00581514	0.00476432	0.00126883	0.00643744	0.00514045	0.00385903	0.00595542	0.0055179	0.00463241	0.00418869	0.00559171	0.00702575	0.00499424	0.00592601	0.00628652	0.00382251	0.00401302	0.00631989	0.00412794	0.00636946
GGCCGT	0.00264168	0.00284744	0.00369481	0.00236357	0.00291197	0.00764132	0.00340071	0.00324269	0.00137636	0.00359424	0.00360012	0.00494977	0.00341184	0.00639014	0.00150911	0.00445229	0.00131019	0.00278148	0.000962772	0.00286395	0.00148777	0.0061052	0.00205035	0.00493726	0.0018986	0.00293006	0.00129834	0.00189241	0.00188896	0.0062674	0.00218546	0.000763659	0.00334436	0.00706388	0.00209305	0.00541451	0.00232998	0.00237952	0.00095777	0.00374191	0.00145836	0.00143659	0.00239463	0.00545177	0.00236234	0.00215183	0.00197913	0.00174432	0.00244265
AGGCCG	0.00240767	0.00127368	0.00380466	0.000951685	0.00176886	0.00231291	0.00284437	0.0013623	0.00101359	0.00145249	0.00312252	0.000576346	0.00281409	0.00217828	0.000867561	0.00167101	0.00125169	0.000366153	0.000946304	0.00109786	0.000429572	0.00146136	0.00151342	0.00096649	0.00158611	0.000889838	0.000699905	0.00050726	0.000687318	0.00117469	0.00184734	6.60487e-05	0.00324957	0.00153907	0.00157344	0.00134508	0.000931485	0.00118122	0.000908441	0.0016804	0.000948968	0.00089565	0.00123566	0.00102248	0.00069855	0.00118356	0.0010999	0.000743156	0.0019213
AAGGCC	0.0159383	0.00791806	0.0102866	0.00747781	0.00979401	0.00475851	0.0126686	0.00945568	0.00993788	0.00791653	0.0118043	0.00464387	0.0113757	0.00705821	0.010127	0.00668426	0.0157248	0.00530172	0.0080718	0.00511321	0.00830681	0.00317933	0.00955246	0.00452016	0.00854282	0.00467782	0.0105427	0.00725266	0.00519276	0.00294743	0.0111972	0.00606372	0.0113631	0.00302377	0.00472039	0.00475855	0.00400879	0.00815666	0.00986299	0.00999636	0.00909648	0.00825998	0.00451023	0.00267748	0.00550772	0.00634654	0.00633251	0.00433371	0.00619518
GAAGGC	0.0139072	0.00789209	0.0104105	0.00756452	0.00903613	0.00450451	0.0109529	0.0101424	0.00972009	0.00830453	0.00965728	0.0047597	0.0100479	0.00712238	0.0109102	0.00655333	0.0168476	0.0065008	0.00792308	0.00565961	0.00837549	0.00293575	0.00831732	0.00397233	0.00781348	0.0050223	0.010076	0.00778142	0.00487161	0.00285894	0.0101719	0.0073982	0.00941782	0.00283306	0.00360586	0.00448626	0.00351613	0.00911073	0.00948335	0.0109888	0.00942155	0.0089049	0.0039274	0.00243563	0.00576704	0.00639766	0.00584887	0.00471859	0.00495516
CGAAGG	0.00695335	0.0039153	0.00738571	0.00377973	0.00473345	0.00276066	0.00657374	0.00511666	0.00517829	0.00434503	0.00529819	0.00229171	0.00631964	0.00381162	0.00500926	0.00371913	0.00752649	0.00284898	0.00376816	0.00283718	0.00413565	0.00181218	0.00419454	0.00204391	0.00399776	0.00255421	0.00509711	0.00353305	0.00257348	0.00171378	0.00599289	0.00298031	0.00548313	0.00186707	0.00217224	0.0026113	0.00185779	0.00452094	0.00477884	0.00539376	0.00410645	0.00434394	0.00214728	0.00148248	0.00291665	0.00328549	0.00297584	0.00215416	0.00273725
CCCGAA	0.00660142	0.00380452	0.00710716	0.00366893	0.0046864	0.00256916	0.00606789	0.00491333	0.00516733	0.00415304	0.00534359	0.00218849	0.00612365	0.00365853	0.00479028	0.00343251	0.00738468	0.00263419	0.00361692	0.0027857	0.00405642	0.00176712	0.00406825	0.00200046	0.00399839	0.00245641	0.00499323	0.00340767	0.00234772	0.0016067	0.00597658	0.00286943	0.00511654	0.00175455	0.00210487	0.0025404	0.00170827	0.00423708	0.00464441	0.00521918	0.00391663	0.00415641	0.00208983	0.00135196	0.00283112	0.0031651	0.00281228	0.00212796	0.00262372
ACCCGA	0.00657355	0.00375108	0.00713053	0.00406362	0.00466973	0.00255809	0.00603098	0.00493703	0.00504449	0.00416466	0.00526077	0.00216596	0.00606621	0.0036244	0.00482918	0.00343251	0.00741354	0.00262525	0.00358533	0.00277743	0.0040786	0.00175958	0.00392591	0.00194455	0.00388329	0.00243908	0.00487923	0.0033443	0.00234772	0.00156037	0.00581332	0.00280593	0.0051041	0.0017262	0.00207829	0.00247186	0.00167304	0.00422423	0.00458469	0.00519191	0.00385011	0.00410627	0.00199513	0.00132001	0.00279462	0.00311464	0.00283567	0.00200741	0.00280583
AACCCG	0.0067237	0.00400718	0.00713307	0.00367097	0.00474286	0.0029101	0.00628047	0.00512394	0.00507867	0.00447746	0.00526067	0.00247405	0.00612885	0.00406823	0.00485693	0.0036886	0.00738438	0.00276779	0.00358533	0.00297154	0.00412264	0.001975	0.00417514	0.00230874	0.00398592	0.00254579	0.00503128	0.00350366	0.00290652	0.00241668	0.00603448	0.00291841	0.00521031	0.00216764	0.00226681	0.00344439	0.00174716	0.00436339	0.00466594	0.00540476	0.00395147	0.00422663	0.00226348	0.00163543	0.00295127	0.00345355	0.00291936	0.00219955	0.00280546
CAACCC	0.00928528	0.00683646	0.00928488	0.00608496	0.00935847	0.00888007	0.00921691	0.00809497	0.00836913	0.00770366	0.00785066	0.00736154	0.0102274	0.0090523	0.00811463	0.00700999	0.0108182	0.00694937	0.00574744	0.00576223	0.00679023	0.00882088	0.00658205	0.00778667	0.0072202	0.0059577	0.00857202	0.00640652	0.00624008	0.00885748	0.00909247	0.00485767	0.00786056	0.00832559	0.00392236	0.00735525	0.00638143	0.00689609	0.00553621	0.00945982	0.0062692	0.00624872	0.00616227	0.00738329	0.00516242	0.00507067	0.00693191	0.00592891	0.00627204
ACAACC	0.00749345	0.00578648	0.0076295	0.00524572	0.0067119	0.00835943	0.00735635	0.00717914	0.00612283	0.00690425	0.0066609	0.00690264	0.00743886	0.00828999	0.00624593	0.00682176	0.00794736	0.00531665	0.00442447	0.00485258	0.00582161	0.00680597	0.00553502	0.00624191	0.00516848	0.00481296	0.00704558	0.00509995	0.0045063	0.0069878	0.00712549	0.00373705	0.00665031	0.00789778	0.00317185	0.00683116	0.00396051	0.0059303	0.00489128	0.0075895	0.0050836	0.00548326	0.0037251	0.00604729	0.00462552	0.00464808	0.00464536	0.00373369	0.00430264
TTTACA	0.00761986	0.00715217	0.00750236	0.00632634	0.0081605	0.00865564	0.00725662	0.00822554	0.00784088	0.00818365	0.00846063	0.00781802	0.006627	0.00862048	0.00742179	0.00776535	0.00816414	0.00779728	0.00556377	0.00576293	0.00764288	0.00752008	0.00857227	0.00765383	0.00761567	0.00569839	0.0084966	0.00621517	0.00877553	0.00792764	0.00582127	0.00376575	0.0076717	0.00931255	0.00469774	0.00750083	0.0083514	0.0070149	0.00604079	0.00767251	0.00780908	0.00769334	0.00724675	0.00697292	0.00508945	0.00561909	0.0076343	0.00679445	0.00747028
TAACAG	0.00229948	0.00176439	0.00209139	0.00135941	0.00155816	0.00259167	0.003118	0.00159001	0.00104884	0.00167327	0.0020783	0.00106697	0.00260856	0.0024399	0.000738972	0.00194648	0.00121431	0.000620584	0.00189786	0.00167201	0.00043375	0.0015625	0.00122007	0.00115358	0.00110561	0.00131476	0.000131756	0.000514891	0.000224579	0.00113162	0.00153809	0.000366645	0.00297661	0.00170608	0.00206965	0.00218621	0.000766393	0.00140808	0.00160392	0.00186624	0.0007917	0.00117512	0.000957152	0.00119545	0.00146304	0.00130926	0.000327013	0.000536595	0.00105575
TTAACA	0.00256169	0.000975512	0.000954658	0.000748843	0.00174929	0.000916834	0.00210195	0.000452919	0.00121958	0.000757628	0.00334119	0.000464333	0.00240736	0.0012644	0.000760644	0.000557128	0.00106358	0.000192122	0.0005909	0.000321673	0.000579652	0.000996809	0.00111415	0.000910778	0.00180603	0.000847235	0.000994852	0.00133228	0.00081626	0.000943493	0.00154081	0.000156302	0.00188783	0.00155031	0.00163584	0.00043601	0.000949887	0.000285542	0.000792475	0.000444342	0.000650619	0.000182998	0.00106579	0.000500071	0.000391294	0.000572075	0.000530752	0.00036475	0.00127231
ATTAAC	0.00477568	0.00236563	0.00123711	0.00189746	0.00203679	0.00102079	0.00328811	0.00248256	0.00271066	0.00186926	0.00398032	0.00127499	0.00257483	0.00155212	0.00231478	0.000837339	0.00328698	0.000848165	0.00148963	0.000747901	0.00296332	0.00099699	0.00334905	0.00152702	0.00288934	0.00108848	0.00443687	0.00247842	0.00198108	0.00101634	0.00308373	0.00203651	0.00185681	0.00155535	0.00118713	0.00043601	0.00133059	0.000923929	0.00349323	0.00106587	0.00262642	0.00156772	0.00127281	0.000553551	0.000546859	0.000819328	0.00129896	0.000964252	0.00101007
GATTAA	0.00214265	0.000889751	2.40871e-05	0.000722505	0.0011696	0.000879272	0.00185396	0.000329859	0.000749089	0.000645545	0.00220645	0.000442212	0.00163884	0.00108148	0.00046746	0.000433428	0.000918796	0.000228063	0.00044652	0.000253873	0.000210067	0.000947163	0.000901866	0.000776457	0.00118454	0.000627686	0.000149674	0.00103637	0.000539966	0.000917681	0.00108516	0.000962983	0.00116865	0.00149947	0.000970778	0.000402189	0.000669169	0.000198981	0.000697978	0.000351873	0.000608629	0.000183035	0.000680998	0.000456101	0.000239594	0.00026823	0.000408826	0.000586567	0.000611871
CGATTA	0.00207197	0.000617424	2.40871e-05	0.000618021	0.000996951	0.000861659	0.00185396	0.000232485	0.000605314	0.000442175	0.00193143	0.000314607	0.00163064	0.00102545	0.000449359	0.000433428	0.000889931	0.000169671	0.000446766	0.000236829	0.000110211	0.000939847	0.000901866	0.000752659	0.000862208	0.000514889	4.4732e-05	0.000157437	0.000134469	0.000875624	0.00105838	4.03772e-05	0.00116865	0.00149015	0.000977496	0.000402189	0.000430549	0.000133743	0.000685843	0.00034513	0.000567437	0.000110589	0.000680894	0.000456101	0.000177321	0.000154745	0.000186478	0.000105618	0.000611871
CCGATT	0.00208617	0.000617424	2.40871e-05	0.000626474	0.000996951	0.000861659	0.00187222	0.000232485	0.000605314	0.000442175	0.001952	0.000320073	0.00163064	0.00102869	0.000449359	0.000433428	0.000889931	0.000169671	0.000430399	0.000236829	0.000110211	0.000943383	0.00090809	0.000756034	0.000862208	0.00052352	3.72445e-05	0.000157437	0.000134469	0.000880254	0.00105838	4.03772e-05	0.00116865	0.00149471	0.000977496	0.000402189	0.000420793	0.000116695	0.000685843	0.00034513	0.000575831	0.000105029	0.000660966	0.000456101	0.000177321	0.000154745	0.000198421	9.38525e-05	0.000611871
CCCGAT	0.00210026	0.000646894	4.99042e-05	0.000635233	0.00100246	0.000855706	0.00187358	0.000232485	0.000639375	0.000446477	0.00195234	0.000320073	0.00163901	0.00102867	0.000449359	0.000433428	0.000889931	0.000169671	0.000430399	0.000246561	0.000110211	0.000943383	0.000914409	0.000752624	0.000862208	0.000528315	6.06831e-05	0.000161559	0.000134469	0.000880354	0.00106836	4.03772e-05	0.00116865	0.00148541	0.000974005	0.000402189	0.000425633	0.00013021	0.000685843	0.00034513	0.000567437	0.000105029	0.000668463	0.000456101	0.000177298	0.000158949	0.000186478	9.68799e-05	0.000611871
TCCCGA	0.00227053	0.000710881	0.00011976	0.000680503	0.00104244	0.00094696	0.00189238	0.000405004	0.000919405	0.000573915	0.00197636	0.00038751	0.00168196	0.00111428	0.000530967	0.000464547	0.000947812	0.000225429	0.000560011	0.000253873	0.000839073	0.00101018	0.00108041	0.000924692	0.000988705	0.00062401	0.000279971	0.000270847	0.000134469	0.000954173	0.00122223	6.92993e-05	0.00132569	0.00152479	0.001093	0.000473763	0.000663384	0.000178533	0.000698108	0.000399368	0.000627174	0.00018093	0.00082	0.000524571	0.000277304	0.000214597	0.000555513	0.000268834	0.00073217
GTCCCG	0.00227773	0.000684971	0.00216146	0.000664826	0.00108504	0.000885342	0.00209288	0.000227668	0.000653183	0.000454111	0.00195252	0.000342161	0.00184883	0.0011009	0.000478041	0.000433428	0.00098227	0.000201309	0.00053027	0.000237702	0.000121249	0.000936389	0.000903032	0.000786605	0.00098892	0.000612938	4.53176e-05	0.000179517	0.000134469	0.000912811	0.00131679	4.65641e-05	0.00120141	0.00149017	0.000991952	0.00043601	0.000585407	0.000148859	0.000698445	0.000365843	0.000575532	0.000105571	0.000835653	0.000499229	0.000187275	0.000181341	0.000405937	0.00011461	0.00072714
TTCGTC	0.00447301	0.00143366	0.00297665	0.00157204	0.0025373	0.0018497	0.00406433	0.000766923	0.00165558	0.00104028	0.00551584	0.00123923	0.00439426	0.00218754	0.00157023	0.00118208	0.0018722	0.000722887	0.000976708	0.000604206	0.000555257	0.00206003	0.00221932	0.00201907	0.00274372	0.00139883	0.00070116	0.00102934	0.000772673	0.00197515	0.00268798	0.00113426	0.00263573	0.00304493	0.00289301	0.0010066	0.00150296	0.000548173	0.00150938	0.000751081	0.00129108	0.000705749	0.00212843	0.00119229	0.000868847	0.00122357	0.00106573	0.000573347	0.00189171
TTTCGT	0.00496845	0.00151602	0.00118682	0.00177827	0.00320471	0.00164433	0.00411761	0.000740752	0.00224836	0.0010937	0.00531689	0.00122845	0.00424252	0.00198056	0.00181292	0.00108905	0.00276099	0.000704881	0.00169566	0.00061999	0.000778608	0.00160836	0.00244316	0.00197899	0.00255272	0.0012642	0.000724321	0.00099704	0.000908772	0.00136081	0.00298252	0.00113944	0.00392335	0.00197523	0.00301913	0.0010066	0.00122942	0.000554368	0.00178775	0.000657243	0.00137813	0.000811528	0.00180723	0.00101822	0.000863601	0.0011705	0.00117586	0.000473174	0.00275758
CTTTCG	0.00675517	0.00296595	0.0059295	0.00253582	0.00523754	0.00235481	0.00746789	0.00270259	0.0045887	0.0025978	0.00623789	0.00221185	0.00842303	0.00358313	0.00396884	0.00153222	0.00628779	0.00243007	0.00365389	0.00178678	0.00201644	0.00204524	0.00321765	0.00252878	0.00396521	0.0030938	0.00115133	0.00332845	0.00140438	0.00195973	0.00609934	0.0038175	0.00630693	0.00258975	0.00407559	0.00236427	0.00223222	0.00204711	0.00276096	0.0022789	0.00282845	0.00254456	0.00262172	0.00178597	0.00189692	0.00273969	0.00236133	0.00261483	0.00332038
GCCTTT	0.00215736	0.000780517	0.000556761	0.00110215	0.00100805	0.00062941	0.00166832	0.000710577	0.000628543	0.000803827	0.00205808	0.000739589	0.00164841	0.0009332	0.000550246	0.00162173	0.00097623	0.000626951	0.000612217	0.000562522	0.000154706	0.000590239	0.00090177	0.000838552	0.000988837	0.000657711	0.000157402	0.000602912	0.000269634	0.000620474	0.00107617	0.000377486	0.00116857	0.000448879	0.00112889	0.00121126	0.000486805	0.00140724	0.000697605	0.00171951	0.00056796	0.000905137	0.00057734	0.000512711	0.00140655	0.00142101	0.000632395	0.000227436	0.000611871
AGGCCT	0.00748423	0.00331779	0.00449144	0.00331489	0.00509071	0.00125341	0.00689412	0.00402251	0.00551862	0.00326676	0.00498549	0.00205087	0.00693996	0.00248644	0.00508947	0.00252219	0.00796223	0.00255555	0.00367863	0.0020298	0.00402498	0.000875834	0.00416108	0.00183168	0.00376628	0.00205281	0.00493291	0.00339851	0.00220778	0.000905567	0.00687376	0.00300816	0.00520685	0.000761565	0.00202003	0.00170673	0.00169555	0.00348809	0.00501832	0.00415482	0.00412253	0.00376199	0.0017238	0.000855876	0.00241387	0.00260492	0.00285349	0.00191422	0.00228474
CAAGAA	0.00222232	0.000850219	0.000107038	0.000732799	0.00105198	0.00132273	0.00195349	0.000295618	0.000609336	0.000847267	0.00210299	0.000611479	0.00187819	0.00145554	0.000414676	0.000718001	0.000889931	0.000507014	0.00038236	0.000424488	0.000111696	0.00293776	0.00100291	0.00195171	0.00084582	0.000770125	0.000144063	0.000764587	0.000503298	0.00287123	0.00111636	0.000123072	0.00142649	0.00185347	0.00114768	0.00187772	0.000419413	0.000356129	0.000685843	0.00108822	0.000639622	0.000220102	0.000927141	0.0016386	0.000447742	0.000421727	0.000186478	0.00011321	0.000611871
CGCAAG	0.00497969	0.00324844	0.00663136	0.00339903	0.00316278	0.00297324	0.00601255	0.00456293	0.00384104	0.00335169	0.00525102	0.00282655	0.00620946	0.00303221	0.00350893	0.00397053	0.00409378	0.00187051	0.00310773	0.00273325	0.00364837	0.00144712	0.0035765	0.00211566	0.00336691	0.00182994	0.00458668	0.00143596	0.0019892	0.000988716	0.00514375	0.000796987	0.003893	0.000789669	0.00271383	0.00380967	0.0017842	0.00369126	0.0049551	0.00416675	0.00302397	0.00363655	0.00202323	0.00130793	0.00316119	0.00279215	0.00238328	0.00112907	0.00234297
TCGCAA	0.00214269	0.000527255	2.40871e-05	0.000374108	0.00101351	0.000674163	0.00177971	0.000193822	0.000561304	0.000290208	0.00205678	0.000209607	0.00161454	0.000803252	0.000387368	0.000309432	0.000889931	0.000134551	0.000430484	0.000202873	0.000110211	0.000510829	0.000914644	0.000664833	0.00084582	0.000390963	3.72445e-05	0.00015748	0.000134469	0.000330508	0.00079171	3.45747e-05	0.00118391	0.000295535	0.000984267	0.00036872	0.000367528	0.000121033	0.000685843	0.000285384	0.00057549	7.74044e-05	0.000495649	0.000282338	0.000110918	0.000104579	0.000186478	4.98759e-05	0.000576009
TTCGCA	0.00218512	0.000662852	4.89429e-05	0.000470988	0.00147922	0.00073293	0.00183652	0.00028263	0.000629426	0.000439803	0.00245998	0.000289151	0.00171264	0.000918595	0.000796678	0.000531076	0.000919564	0.000193933	0.000693624	0.000272909	0.000288936	0.000988122	0.0013651	0.000862069	0.00115422	0.000485847	0.00043687	0.000298589	0.000640396	0.000801749	0.000855679	5.8003e-05	0.00193805	0.000995461	0.00110456	0.000472339	0.0010285	0.000129824	0.000685843	0.000379625	0.00087326	0.000197021	0.00103266	0.000380277	0.000160172	0.000142599	0.00075638	0.000708116	0.00109601
ATTCGC	0.00214996	0.000643823	4.89429e-05	0.000445973	0.00144593	0.00072713	0.00168856	0.000248658	0.000530346	0.000416997	0.00233422	0.000278164	0.00148417	0.000889086	0.000796678	0.000531076	0.000919564	0.00021636	0.0006455	0.000272909	0.000288936	0.000970199	0.00132067	0.000841821	0.000907311	0.000494362	0.000399626	0.000290216	0.000595573	0.000801749	0.000855679	4.6488e-05	0.00190496	0.00100509	0.000690138	0.000472339	0.000834971	0.000121171	0.000685843	0.000372987	0.000889618	0.00018596	0.000973109	0.000391547	0.000155744	0.000125826	0.000744745	0.000714088	0.00109601
TATTCG	0.0024997	0.00166949	0.000389198	0.00121281	0.00244467	0.00499175	0.00190138	0.000933021	0.0014319	0.00163205	0.00320676	0.002489	0.00212113	0.00419184	0.00113295	0.00228985	0.00145547	0.00186388	0.00099124	0.0017083	0.000438349	0.00491512	0.00201841	0.00349754	0.00148781	0.00189296	0.000834802	0.000938657	0.00147998	0.0048889	0.00157528	0.000302303	0.00336123	0.00507682	0.00164209	0.00250735	0.00164983	0.00104786	0.000966377	0.00196116	0.00118008	0.000374843	0.00219897	0.00358512	0.00115667	0.000555181	0.00142329	0.00118071	0.00218453
CTATTC	0.0042641	0.0012546	7.21378e-05	0.00102668	0.00206598	0.001596	0.00355932	0.000480576	0.00105688	0.000827505	0.0042392	0.00055767	0.00312525	0.00189729	0.0010878	0.000836058	0.00175129	0.00032155	0.000828555	0.000422832	0.000319538	0.00190041	0.00187389	0.00147863	0.00168461	0.000986541	0.000290822	0.000319326	0.000313761	0.00168148	0.0019125	8.07843e-05	0.00236782	0.00224717	0.00158725	0.000804729	0.00092591	0.000229164	0.00138389	0.000670556	0.00115106	0.000198997	0.00140876	0.000869256	0.000337302	0.000267624	0.000571005	0.000182258	0.00125979
ACTATT	0.00202983	0.000708427	2.42119e-05	0.000426261	0.000919624	0.000863134	0.00165029	0.000295988	0.000462224	0.00051187	0.00218321	0.000292895	0.00135543	0.000953456	0.000674548	0.000402469	0.000889931	0.000165367	0.000430401	0.000279483	0.000209327	0.000982248	0.000927112	0.000739162	0.000771593	0.000476089	0.000245891	0.00022423	0.000179292	0.00088023	0.0010494	6.94183e-05	0.00118391	0.00145828	0.00059944	0.00036872	0.000509379	0.000121055	0.000721434	0.000365148	0.000485012	7.18451e-05	0.000819639	0.000478115	0.000146322	0.000163154	0.000361196	0.000220737	0.000647917
CACTAT	0.00153682	0.000332418	2.45942e-05	0.000330579	0.0010012	0.000263929	0.00128028	4.83739e-05	0.000275181	0.000247816	0.00195211	7.71645e-05	0.00162409	0.000458729	0.000512339	0.000123996	0.000833694	3.57808e-05	0.000223853	7.60431e-05	0.000165176	0.000439132	0.000768843	0.000199279	0.000567088	0.000134069	6.71563e-05	4.14577e-05	0.000179292	0.000540461	0.0011389	4.62093e-05	0.00110823	0.00116713	0.000475709	3.38203e-05	0.00029031	2.59366e-05	0.00065295	8.63688e-05	0.000410938	5.53073e-06	0.000701495	0.000141117	4.87813e-05	6.70068e-05	0.000198352	4.6973e-05	0.000432565
TCACTA	0.00153063	0.000353476	0	0.000314259	0.000940336	5.87305e-05	0.0012432	8.25535e-05	0.000570364	9.18045e-05	0.00159549	9.44937e-05	0.00128152	0.000278733	0.000440974	3.09588e-05	0.000717777	4.03397e-05	0.000352777	7.63965e-05	0.000133971	7.16533e-06	0.000743369	0.000155627	0.000560976	9.97498e-05	0.000120795	0.000105459	0.000504994	1.92116e-05	0.00115103	0.00015062	0.0011243	7.83092e-05	0.000545097	0.0001029	0.000512114	3.48415e-05	0.000652828	6.92382e-06	0.000411064	2.26241e-05	0.000634702	2.20733e-05	0	2.93879e-05	0.000572195	0.000113739	0.000434492
CTCACT	0.00269684	0.00275168	0.00106894	0.00261822	0.0033731	0.00574939	0.0030669	0.00293435	0.00228388	0.00352288	0.0036543	0.00547836	0.0023954	0.00488112	0.00254381	0.00364204	0.00145798	0.00498694	0.00145671	0.00286722	0.00237371	0.00579885	0.00310274	0.00502963	0.00168196	0.00279671	0.00216279	0.00222975	0.00290923	0.00580118	0.00215123	0.000937948	0.00338328	0.00735135	0.00237497	0.00445835	0.00378898	0.00268537	0.00169053	0.00259543	0.00222866	0.00265909	0.00275447	0.00469782	0.00217115	0.00164916	0.0023135	0.0027084	0.00271606
TTCTCA	0.00153708	0.000441336	7.31548e-05	0.000439063	0.000826392	0.000149166	0.00122447	0.000204069	0.00029748	0.000343854	0.00163748	0.000425488	0.00123926	0.000397158	0.000461437	0.000222812	0.000717777	0.000110409	0.000207385	0.000172313	0.000835421	7.34463e-05	0.000787631	0.000383211	0.000492512	0.00019815	5.95912e-05	0.000343963	0.000239236	6.1673e-05	0.00137121	4.61791e-05	0.00109297	0.00014478	0.000920773	0.000344316	0.000417998	0.000133296	0.000567615	0.000218602	0.0004028	0.000136823	0.000440539	0.000112101	0.000154898	0.000162909	0.000495231	0.000121065	0.000529115
TCCTTC	0.00278315	0.00218196	0.00100061	0.0015471	0.00211331	0.000823262	0.00246546	0.00191984	0.00220611	0.00149566	0.00295033	0.00117409	0.00216773	0.0012789	0.00160332	0.00117241	0.0013469	0.00245921	0.00256698	0.00135407	0.001488	0.000985107	0.00254564	0.00150064	0.00189972	0.00147553	0.000442898	0.0012003	0.00198049	0.000910861	0.00150567	0.000576328	0.00185229	0.00082167	0.00201639	0.00176887	0.0029063	0.00172093	0.00208126	0.000872303	0.00163293	0.00237174	0.00219878	0.000791029	0.00147822	0.00121149	0.00129643	0.00227858	0.00105659
ATCCTT	0.00236174	0.00174594	0.000925009	0.00141838	0.00186131	0.000779609	0.00242415	0.0030689	0.00180414	0.00147615	0.00238267	0.000974394	0.00214374	0.0010977	0.00131892	0.00103908	0.00127101	0.00234714	0.00225121	0.00123953	0.00126258	0.000991527	0.00195536	0.00145276	0.00147676	0.00129269	0.000241363	0.000946959	0.00128843	0.000721589	0.00147563	0.000436412	0.00175778	0.000788353	0.00186534	0.00173089	0.0024627	0.00150834	0.00196327	0.000735592	0.00140656	0.00200573	0.00122314	0.000666101	0.00124114	0.00100266	0.000892789	0.00159158	0.000941824
AATCCT	0.00213609	0.00108655	0.000241994	0.000697587	0.00117485	0.000867883	0.0019291	0.000769173	0.000828797	0.00070699	0.00201456	0.000670716	0.00176161	0.00109248	0.000603033	0.000403271	0.000947662	0.00031155	0.00193714	0.000477201	0.000969931	0.000871488	0.00102279	0.000834456	0.000994197	0.000868714	8.94254e-05	0.000390343	0.000379966	0.000806967	0.00119354	0.000388422	0.00145846	0.00144034	0.00152708	0.00144468	0.0013105	0.000260085	0.000685843	0.000398685	0.000716279	0.000544397	0.00101681	0.000696508	0.000908375	0.000525493	0.000530624	0.000605204	0.000853354
CAATCC	0.00290312	0.00178921	0.000806446	0.00140725	0.00253857	0.000790767	0.00309499	0.00116814	0.00274	0.00139086	0.00378954	0.0011444	0.00243886	0.000990731	0.00179864	0.00104573	0.00143167	0.00250345	0.00130716	0.000970576	0.00256682	0.000892727	0.00293859	0.00170853	0.00260455	0.000928376	0.00121581	0.000766662	0.00303637	0.00113321	0.00133764	0.000124073	0.00283769	0.00106729	0.00206872	0.000608527	0.00387307	0.00135343	0.00212334	0.000662603	0.00177695	0.00198183	0.00281646	0.000825878	0.000620138	0.000870404	0.00299749	0.00250485	0.00351543
TCAATC	0.00281576	0.00173844	0.00026723	0.0012408	0.00171517	0.00252488	0.00193391	0.00192771	0.00108146	0.00203022	0.00229106	0.00132451	0.0020998	0.00306558	0.00188751	0.000466643	0.00328491	0.00198714	0.00102369	0.0011319	0.000520961	0.00242488	0.00119167	0.00220919	0.00132479	0.00165676	0.000203048	0.00133749	0.000269634	0.00136411	0.00146083	0.0015572	0.0013219	0.0030078	0.00109092	0.00151309	0.00069506	0.00210524	0.00110117	0.00343641	0.00180809	0.00152355	0.00104394	0.00190585	0.000952194	0.00155915	0.000537906	0.00106922	0.000611871
GTCAAT	0.00341659	0.00445464	0.00135857	0.00342659	0.00360958	0.00840781	0.00298712	0.00524203	0.00251724	0.00556921	0.00356345	0.00651108	0.00321464	0.00800401	0.00352069	0.005025	0.0037876	0.00669668	0.00159706	0.00453544	0.00271636	0.00834954	0.00271749	0.00679759	0.00248679	0.00452482	0.00175864	0.00406406	0.00285099	0.00697047	0.00230443	0.00328294	0.00166651	0.00930925	0.00224559	0.005733	0.00373897	0.00470571	0.00246242	0.00587784	0.00306234	0.00370315	0.00267179	0.0065905	0.00320748	0.00342288	0.00208587	0.00331437	0.00146722
CGTCAA	0.00387413	0.00243586	0.00166502	0.00120106	0.0028376	0.00295645	0.00363522	0.00250195	0.0021357	0.00257657	0.00297265	0.00132907	0.00454361	0.00328182	0.00227187	0.00204065	0.00381616	0.0019343	0.00142914	0.00214869	0.000720729	0.00178597	0.00144847	0.00120587	0.001974	0.00192486	0.000413015	0.00246132	0.000719954	0.00136844	0.00328224	0.00265317	0.00244043	0.00174393	0.00174933	0.00225683	0.00116111	0.00251639	0.00212085	0.00336947	0.00199028	0.00187224	0.00130965	0.00110062	0.00130199	0.00210883	0.000914405	0.00166812	0.000904213
GTACCG	0.00887034	0.00542048	0.00849482	0.00531183	0.00737586	0.0038734	0.00783568	0.00611735	0.00694856	0.00576837	0.010224	0.00309091	0.00657257	0.00468781	0.0064146	0.00513839	0.00647226	0.00461164	0.00561925	0.0035763	0.00705485	0.00342089	0.00906993	0.00443777	0.00841655	0.00353041	0.00880329	0.00371758	0.00748864	0.00342489	0.00677195	0.000836577	0.00851253	0.00407162	0.00589322	0.00434893	0.0081822	0.00511104	0.00588061	0.00473181	0.00720443	0.00626765	0.00800665	0.00312572	0.00336752	0.00416065	0.00847198	0.00512117	0.00808446
GGTACC	0.00650816	0.00486763	0.00571003	0.00442454	0.00608048	0.00726995	0.00547293	0.00566309	0.00599024	0.00557493	0.00789189	0.00472411	0.00497414	0.00670296	0.00496885	0.00553344	0.00501694	0.00403703	0.0045773	0.00392289	0.00585547	0.00615408	0.00702419	0.00577907	0.00672783	0.00392505	0.00789892	0.00298384	0.00660457	0.00639507	0.00506602	0.000992529	0.00558634	0.00686984	0.0042161	0.00587939	0.00623527	0.00460125	0.00402613	0.00566759	0.00570405	0.00463389	0.00672751	0.0058988	0.00379376	0.00377639	0.00651532	0.00409645	0.00679955
CCGGTA	0.00228638	0.000741927	0.000148839	0.000679782	0.00103665	0.000951538	0.00192848	0.000381237	0.000774168	0.000488295	0.00237672	0.000443628	0.00171485	0.00109166	0.000512365	0.000560379	0.0010917	0.000210677	0.000462071	0.000313764	0.000167515	0.00103294	0.00100106	0.000845312	0.001023	0.000619719	0.000347624	0.000388131	0.000179524	0.000927895	0.00118753	0.000126884	0.00228149	0.00166794	0.00108346	0.000502102	0.000557087	0.00018197	0.000707662	0.000411863	0.000643274	0.000250801	0.000913789	0.000567862	0.000279387	0.000200948	0.000332019	0.000154551	0.000648293
TCCGGT	0.00218559	0.000679704	9.67228e-05	0.000626519	0.00103036	0.000891209	0.00183597	0.000276343	0.000638493	0.000457531	0.00222626	0.000381192	0.00166546	0.00103855	0.00046746	0.000433428	0.000861361	0.00017428	0.000446195	0.000228395	0.000110211	0.000957214	0.000914442	0.000762731	0.000986939	0.000536588	0.000254402	0.000311983	0.000134469	0.000912717	0.00115946	5.77542e-05	0.00203072	0.00149544	0.00101775	0.00043601	0.00049365	0.000143019	0.0006735	0.000365251	0.000591932	0.000138448	0.000707434	0.000466965	0.000221882	0.000159038	0.000221753	0.000105664	0.000648293
TTCCGG	0.00217844	0.000713538	9.67228e-05	0.000626519	0.00103036	0.000879272	0.00185322	0.000291202	0.000638493	0.000469879	0.00222626	0.000369855	0.00167191	0.00104178	0.000476751	0.000433428	0.000861361	0.000169671	0.000446195	0.00023719	0.000110211	0.000957178	0.000959951	0.000776293	0.000969651	0.000545107	0.000292551	0.000337458	0.000134469	0.0009173	0.00107613	5.7694e-05	0.00181033	0.0014858	0.00101878	0.00043601	0.000503363	0.000138566	0.000673156	0.000372065	0.000583753	0.000132741	0.000761458	0.000466745	0.000221882	0.00016322	0.000221753	0.000174744	0.000648293
ATTCCG	0.00268144	0.00249502	0.00029943	0.00205973	0.00255352	0.0065188	0.00253275	0.00232075	0.00123136	0.00276158	0.00319464	0.00520304	0.00273423	0.00540137	0.001362	0.00334679	0.000890995	0.00284412	0.00062111	0.00213258	0.00156095	0.00595239	0.00259524	0.0051064	0.00212232	0.0029647	0.00126602	0.00185343	0.00211983	0.00623136	0.00185809	0.00079854	0.00134944	0.00778021	0.00211488	0.00470059	0.00261181	0.00151764	0.00074791	0.00252993	0.00271777	0.00126788	0.00220246	0.00525879	0.00192175	0.00147139	0.00170986	0.00171426	0.00190796
TATTCC	0.00580124	0.00684949	0.00727648	0.00546862	0.00775702	0.00933111	0.00796925	0.00724563	0.00664996	0.00778576	0.00763909	0.00839872	0.00795446	0.00881298	0.0063313	0.00750004	0.00511299	0.00957842	0.00349757	0.00586008	0.00648321	0.00824934	0.00742051	0.00817847	0.00712474	0.00601531	0.00498331	0.00556772	0.00882821	0.00885823	0.00578685	0.00381243	0.0066305	0.00987451	0.00541639	0.00780662	0.0100926	0.00644912	0.00460157	0.00613105	0.00642379	0.00674217	0.00815724	0.0075766	0.00435316	0.0054428	0.00750975	0.00805615	0.00686182
TCTATT	0.00269019	0.00126636	0.000196148	0.0013032	0.00169098	0.00144413	0.00209749	0.00140301	0.00105008	0.00117343	0.00224901	0.00103688	0.0023112	0.0017756	0.00184935	0.00144734	0.00325649	0.00123391	0.00107165	0.000768355	0.000346479	0.00118568	0.00125435	0.00121272	0.00132902	0.00113322	0.000215311	0.00101352	0.000230978	0.00106058	0.00139876	0.00178535	0.00130624	0.00179951	0.0010474	0.000673315	0.000877569	0.00123322	0.00108929	0.000846543	0.00151444	0.00104062	0.000900953	0.00103164	0.000769054	0.000665889	0.000729072	0.000668022	0.000775223
TTCTAT	0.0021361	0.000636629	2.40871e-05	0.000635279	0.000969282	0.000873411	0.00190903	0.000247704	0.000605722	0.000453801	0.00207766	0.000348035	0.00163892	0.0010454	0.000485704	0.000433428	0.000889931	0.000178627	0.000446195	0.00022848	9.93417e-05	0.000960875	0.000914644	0.000769696	0.00087981	0.000536774	3.72445e-05	0.000170287	0.000180722	0.000866389	0.00104064	4.03473e-05	0.00118391	0.00149476	0.00099088	0.00043601	0.000471341	0.000125509	0.000685843	0.00034513	0.00059206	0.000155602	0.000702864	0.000445238	0.000181772	0.000159462	0.000198114	0.000127106	0.000611871
TTTCTA	0.00213564	0.00064138	2.40871e-05	0.000635279	0.000958145	0.000873411	0.00190903	0.000217983	0.000605314	0.00044232	0.00207766	0.000336639	0.00163875	0.00104181	0.000458409	0.000433428	0.000889931	0.000169671	0.000478277	0.00022848	9.93417e-05	0.000964301	0.000927113	0.000762839	0.000853992	0.000533031	3.72445e-05	0.000170134	0.000134469	0.000870945	0.0010764	7.49513e-05	0.00118391	0.00149935	0.00103768	0.00043601	0.000426084	0.000116649	0.000685843	0.00034513	0.000575403	0.000121622	0.00066754	0.000445238	0.000186178	0.000154639	0.000198114	0.000130754	0.000611871
GCTTTC	0.00381095	0.00309001	0.00307933	0.00181953	0.00420057	0.00304105	0.00495077	0.00307343	0.00379116	0.00277408	0.00397166	0.00177553	0.00426639	0.00341462	0.00236413	0.00246182	0.0027625	0.00154242	0.00462384	0.00218464	0.00253667	0.00181297	0.00387169	0.00217703	0.00379676	0.00290732	0.00189517	0.00160141	0.00353838	0.00208133	0.0028511	0.00066846	0.00583844	0.00215587	0.00374008	0.00434354	0.0044947	0.00187292	0.00229875	0.00198882	0.00318005	0.0027337	0.00421028	0.00278514	0.00217507	0.00264001	0.0040222	0.00394302	0.00459341
GGCTTT	0.00301675	0.0018796	0.00145117	0.00120737	0.00316115	0.00146607	0.00327468	0.00171308	0.00203643	0.00140967	0.00260942	0.00135445	0.00275263	0.00213608	0.00179745	0.000930541	0.0025715	0.000993181	0.00394838	0.00127152	0.0016682	0.00126247	0.00200553	0.00129904	0.00146999	0.00193575	0.000497188	0.000975254	0.000725696	0.00127857	0.00247395	0.000598928	0.0043159	0.00197492	0.00260567	0.00336596	0.00197224	0.000811397	0.00216983	0.000762511	0.00146048	0.00152964	0.00205491	0.00144243	0.00153363	0.00138551	0.00163634	0.00161155	0.00228706
TGGCTT	0.00231591	0.00146335	0.00131695	0.000941868	0.0016647	0.00129787	0.00247142	0.00113981	0.00128592	0.000999406	0.0031674	0.000986077	0.00234506	0.00162533	0.00142896	0.000900233	0.00126894	0.000569574	0.00233808	0.00101282	0.000889366	0.0011641	0.00131059	0.00102034	0.00175467	0.00131063	0.000357635	0.000502885	0.000680862	0.00106322	0.00137109	0.000441001	0.00226726	0.00178259	0.00226728	0.00228563	0.0017158	0.000554803	0.00177886	0.000658995	0.000931133	0.000828363	0.00181902	0.000969589	0.0012192	0.000782406	0.000915699	0.000871175	0.0016479
GTGGCT	0.00243217	0.00172764	0.00216258	0.00120238	0.0021719	0.00129787	0.00266296	0.00183455	0.00129673	0.00128639	0.00351395	0.00113414	0.00241247	0.00168623	0.00201396	0.00138012	0.00168381	0.00254695	0.00230744	0.00122265	0.00219944	0.00146307	0.0023396	0.00158398	0.00208624	0.00158323	0.000358132	0.000563102	0.000680862	0.00150008	0.00136237	0.000488561	0.00226726	0.00188718	0.00231336	0.00239015	0.00259952	0.00124505	0.00284958	0.000967958	0.00202543	0.00213637	0.00188745	0.000991718	0.00156221	0.00125713	0.00101189	0.0016034	0.00160034
CGTGGC	0.00230137	0.00153605	0.00149137	0.00113043	0.00196077	0.00129787	0.0025252	0.00145491	0.00104794	0.00108202	0.00256506	0.00105407	0.00226921	0.00167879	0.00148641	0.00112437	0.00150494	0.00123341	0.00230693	0.00109047	0.00140195	0.00130409	0.00180849	0.00131923	0.00161167	0.00143161	0.000388323	0.000537469	0.00035928	0.00126479	0.00136237	0.000452884	0.00229763	0.00181104	0.00229918	0.00232107	0.00215082	0.000777595	0.00213153	0.000796734	0.00151554	0.00144579	0.00162208	0.00100229	0.00138394	0.000985217	0.000711724	0.00113733	0.00111991
CCGTGG	0.00293762	0.00166936	0.00334785	0.00136811	0.00273917	0.00142432	0.00306848	0.00118001	0.00184845	0.00120734	0.0026136	0.00110605	0.00248679	0.00170883	0.00179685	0.000997438	0.00237219	0.000579577	0.00316152	0.00116072	0.000897111	0.00121806	0.00163613	0.00108912	0.00166723	0.0014187	0.000457205	0.000579109	0.000551268	0.00112993	0.0017405	0.000487984	0.00388679	0.00183436	0.00229168	0.00228974	0.00185421	0.000661609	0.00209917	0.000701079	0.00111354	0.00110828	0.00169896	0.00102501	0.00129594	0.000813624	0.00130588	0.000930996	0.00171239
GCCGTG	0.00231531	0.00150089	0.000847293	0.000985488	0.00173138	0.00132187	0.00245012	0.00112503	0.00101423	0.000975511	0.0024135	0.000997206	0.00224383	0.0016424	0.00121678	0.000868622	0.00132667	0.000578532	0.00227441	0.00103834	0.000763679	0.0011781	0.00129727	0.00105412	0.00136562	0.00132359	0.000380634	0.00065695	0.00035928	0.00107246	0.00137136	0.000458318	0.00226726	0.00178229	0.0021358	0.00221852	0.00163123	0.000589595	0.00177867	0.00064565	0.000972665	0.000861749	0.00163632	0.00099131	0.00124145	0.000764919	0.000688145	0.000813167	0.00111991
AATTCC	0.00327285	0.00331312	0.00236233	0.003751	0.00277573	0.00556716	0.00219499	0.00467479	0.0028544	0.0039139	0.0022689	0.00562974	0.00162786	0.00480645	0.00324146	0.00477175	0.00358101	0.00351845	0.00237702	0.00287358	0.00414336	0.0050853	0.00325868	0.00494552	0.00188976	0.0025774	0.00510268	0.00246906	0.00251056	0.0055832	0.00279474	0.00119689	0.00239945	0.00600621	0.000872514	0.00526933	0.00199828	0.00354255	0.00311618	0.00457982	0.00281466	0.00320349	0.00211008	0.00489234	0.00341655	0.00239666	0.00284543	0.00137329	0.001973
AAATTC	0.00298249	0.00174776	0.00211428	0.00232931	0.00164993	0.000147874	0.00160108	0.00275965	0.00250088	0.00186096	0.00177231	0.00121559	0.000844869	0.000581315	0.00252482	0.0019287	0.00355137	0.000987869	0.0023608	0.00110379	0.00310672	0.000198005	0.00270766	0.000947557	0.00159447	0.000511024	0.00455074	0.00122186	0.00154019	0.000422498	0.00221819	0.000487278	0.00232201	6.08447e-05	0.000326972	0.00122329	0.00057912	0.00226935	0.00306763	0.00249131	0.00227246	0.00266141	0.000923039	0.000349677	0.00174751	0.00143791	0.00197962	0.000515976	0.00148884
AAAATT	0.00299528	0.0017478	0.00216245	0.00229385	0.00161689	0.000148282	0.00160108	0.00271554	0.00245629	0.0018337	0.00177231	0.00119868	0.000844869	0.000581949	0.00249762	0.00189694	0.00355137	0.000983333	0.00232855	0.00104511	0.00305131	0.000179922	0.00269493	0.000930383	0.00154479	0.000510459	0.00452682	0.00121771	0.00144182	0.000369945	0.00220911	0.000469841	0.00230628	4.68538e-05	0.000326954	0.00122329	0.000559583	0.00225108	0.00306751	0.00248453	0.00227264	0.00261609	0.000863389	0.00037301	0.00172504	0.00141656	0.00196793	0.000516038	0.00148884
CAAAAT	0.00294587	0.00171481	0.00213153	0.00230279	0.00161117	0.000117887	0.00158253	0.00260283	0.00267913	0.00179878	0.00168864	0.00120451	0.000844869	0.000530981	0.00247952	0.00186582	0.00355137	0.000978649	0.00232678	0.000984132	0.00303986	0.000169206	0.00266323	0.000927314	0.00152853	0.000483549	0.0044378	0.00121782	0.0013979	0.000257598	0.00219994	0.000469841	0.0022914	4.16776e-05	0.000353793	0.00105609	0.000545063	0.00225108	0.00306751	0.00248453	0.00226415	0.00258846	0.000857659	0.000305874	0.00171185	0.00138272	0.00195647	0.00050388	0.00145202
CCAAAA	0.00377327	0.0019973	0.00314164	0.0025915	0.0027726	0.000288417	0.0020503	0.00275588	0.00343525	0.00214357	0.0028221	0.00119926	0.00126361	0.000631816	0.00323431	0.00199678	0.0045325	0.00113787	0.00313387	0.00104871	0.00347617	0.000217354	0.00331614	0.00112101	0.00209567	0.000770629	0.00501769	0.00191186	0.00209086	0.000317233	0.0027989	0.000513383	0.00393013	4.34652e-05	0.000626463	0.00120821	0.000850409	0.00232044	0.00342332	0.00245032	0.00384457	0.00321477	0.00132361	0.000525023	0.00179978	0.00176977	0.00262848	0.000732778	0.0029113
TCCAAA	0.00300411	0.0017206	0.00210682	0.00235549	0.00166765	0.000117887	0.00160108	0.00268166	0.00250082	0.00179366	0.00175131	0.0011765	0.000852983	0.000517631	0.00248871	0.00192838	0.00355137	0.000997216	0.00234468	0.000992259	0.00303997	0.000173404	0.00269455	0.000927167	0.00156165	0.000475499	0.00456537	0.0014526	0.00158411	0.000275443	0.00222677	0.000481446	0.00239785	2.78803e-05	0.000326936	0.00105609	0.000570779	0.00227719	0.00306763	0.00243698	0.00228081	0.00270378	0.000885625	0.000294723	0.00173877	0.00140368	0.00196805	0.000521672	0.00145165
GTCCAA	0.00410134	0.00268587	0.00254638	0.00259446	0.00375098	0.00046572	0.0027782	0.00306251	0.00455089	0.00255077	0.00399438	0.00176059	0.0019219	0.000784617	0.00354455	0.00277824	0.00391178	0.00160445	0.00349975	0.00126896	0.00451852	0.000354031	0.00593507	0.00188955	0.00456111	0.00114414	0.00676769	0.00202097	0.00561405	0.000975352	0.00281368	0.000515113	0.00466368	0.000769959	0.00201057	0.0013237	0.00452034	0.00247729	0.00338858	0.0025463	0.00489627	0.00378687	0.00499727	0.00125045	0.00190118	0.00219372	0.00542748	0.00357758	0.0055481
TGTCCA	0.00410831	0.00270578	0.00257059	0.00259446	0.00375184	0.000453751	0.00277878	0.00305234	0.00453994	0.00253491	0.00404188	0.00176614	0.00192202	0.00079462	0.00355355	0.00277824	0.00391178	0.00160003	0.00351765	0.00125226	0.00454349	0.000358486	0.00590881	0.00187898	0.00455254	0.00113496	0.00672269	0.00200863	0.005569	0.000980085	0.00279552	0.000515113	0.0046636	0.000737138	0.00201354	0.0013237	0.00456804	0.00245563	0.0034151	0.0025463	0.00489942	0.00377575	0.00503232	0.00123936	0.00190587	0.00219376	0.00542748	0.0036048	0.00551205
TTGTCC	0.00434683	0.00289085	0.00261901	0.00263947	0.00384131	0.000775235	0.00291304	0.00314131	0.00457382	0.00285807	0.00438474	0.00193247	0.00205715	0.00124221	0.00362649	0.0029701	0.00394417	0.00163167	0.00348565	0.0013641	0.00459897	0.000509939	0.00592185	0.00199399	0.00467676	0.0012103	0.00690258	0.00218888	0.00551785	0.00162175	0.00295278	0.000562925	0.00524575	0.00103765	0.00219482	0.00229586	0.0046217	0.00247277	0.00340041	0.00275202	0.00490756	0.0037924	0.00511993	0.0015075	0.0020697	0.00236263	0.00546281	0.00359892	0.00558471
ATTGTC	0.00410207	0.00269135	0.00249808	0.00259446	0.00373298	0.000453751	0.00273977	0.00304889	0.00454994	0.00254678	0.00406288	0.00176053	0.00191365	0.000781882	0.00359038	0.00277824	0.00391454	0.00159052	0.00348565	0.00132026	0.00525755	0.000358354	0.0059007	0.00187894	0.00459473	0.0011252	0.00667798	0.00201699	0.00562261	0.000965898	0.00277754	0.000515113	0.00463316	0.000746662	0.00200713	0.0013237	0.00468858	0.00245982	0.00338853	0.00255982	0.00489968	0.00379237	0.00501307	0.00122703	0.00190632	0.00216858	0.00572391	0.00360472	0.00564465
CATTGT	0.005218	0.00339468	0.0074962	0.00320479	0.00519987	0.00214563	0.00563563	0.00432184	0.00606593	0.00391766	0.00576872	0.00219478	0.00553617	0.00233985	0.00439736	0.00382498	0.00460678	0.00220912	0.004067	0.00217161	0.00582166	0.00108321	0.0062545	0.00230697	0.00557115	0.00203481	0.00703624	0.00353362	0.00604647	0.00140793	0.00557254	0.00177881	0.00686284	0.00107582	0.00286966	0.00272252	0.00523608	0.0036248	0.00396532	0.00384861	0.00497419	0.00490444	0.00576907	0.00194295	0.00256385	0.00356489	0.00641363	0.00433247	0.00655215
GCCCAT	0.00408889	0.00347265	0.00702618	0.00415949	0.00386646	0.00378502	0.00518684	0.00562191	0.0044355	0.00439789	0.00381982	0.00337586	0.00490226	0.00444881	0.00453941	0.00393174	0.00431094	0.00503904	0.00302511	0.00282398	0.00498497	0.0042689	0.00387866	0.00368684	0.00294853	0.00259551	0.00464776	0.00210969	0.0036493	0.0026719	0.00515849	0.0007555	0.00398604	0.0022199	0.00204642	0.00509223	0.00377405	0.00478109	0.00469328	0.00465694	0.00336613	0.00509286	0.00243427	0.00238762	0.00332913	0.00376469	0.00393349	0.00262348	0.00268511
CGCCCA	0.00411014	0.00348205	0.00705039	0.00415049	0.00387755	0.00377889	0.00520626	0.00562724	0.00441309	0.00439357	0.00381982	0.00338769	0.00491883	0.00445519	0.00455785	0.00393174	0.00431094	0.005025	0.00304115	0.00280667	0.00499595	0.00426168	0.00386556	0.00369365	0.00294853	0.00259105	0.00465528	0.00210127	0.0036493	0.0026671	0.00517651	0.0007555	0.00398604	0.00222466	0.00205333	0.00509223	0.00378391	0.00477664	0.00470511	0.00465694	0.00337436	0.00509286	0.00243431	0.00241019	0.00332913	0.00376071	0.00393349	0.0026234	0.00268511
GCGCCC	0.00275171	0.00217079	0.00585233	0.00314008	0.00171668	0.00194372	0.00380285	0.00407344	0.00305088	0.00293198	0.00313227	0.00165562	0.00418249	0.00189319	0.00276889	0.0030069	0.00277131	0.00161265	0.00146082	0.00206569	0.003001	0.00134486	0.00236021	0.00142654	0.00231532	0.00131059	0.00424357	0.00106104	0.00185593	0.000534875	0.00421759	0.000501131	0.00190001	0.00043701	0.000982147	0.00276805	0.000956305	0.00328598	0.00324799	0.00365435	0.00215825	0.00324415	0.00120105	0.000850613	0.00219772	0.00247306	0.00182882	0.000777152	0.00140596
TGCGCC	0.00276613	0.0022736	0.00592521	0.00278834	0.00166425	0.00198136	0.00380285	0.00410435	0.00295947	0.00275261	0.00311223	0.00171251	0.0041992	0.00189629	0.00277809	0.00319692	0.00285791	0.00144689	0.0013784	0.00172527	0.00387612	0.000814117	0.00238585	0.00130453	0.00232328	0.00109135	0.00475057	0.00114658	0.00185593	0.000605733	0.00423691	0.000506933	0.00191723	0.000332246	0.000960939	0.00276805	0.000985885	0.00326564	0.00327175	0.0036676	0.00223386	0.00314142	0.00135755	0.000839403	0.00220652	0.00244754	0.00230891	0.000816574	0.00144316
TTGCGC	0.00429038	0.00438554	0.00653603	0.00378768	0.00365268	0.00282125	0.00452043	0.00649646	0.00433046	0.00465216	0.00357479	0.00284963	0.00551969	0.00398239	0.00573759	0.00376139	0.00770561	0.00380456	0.00299826	0.00349269	0.00405514	0.00134577	0.00331072	0.00170458	0.00425033	0.00293457	0.00484008	0.00330783	0.00276623	0.00105499	0.00528875	0.00312502	0.00218245	0.000880363	0.00146966	0.0031045	0.00216708	0.00555756	0.00414988	0.00636085	0.0046565	0.00490986	0.00167989	0.00102382	0.00325678	0.00396945	0.00271082	0.00281065	0.00145047
GCTTGC	0.00275904	0.00219594	0.00605343	0.00273536	0.00164755	0.00194409	0.00382376	0.00403712	0.00294841	0.00273982	0.00310993	0.00162735	0.00421726	0.00187983	0.00271451	0.00310326	0.00285791	0.00145651	0.0013784	0.0017454	0.00302295	0.000825008	0.00239332	0.0012521	0.00231488	0.00107418	0.00428101	0.0010569	0.00176342	0.000520441	0.00420998	0.000501255	0.00190021	0.000370291	0.000950924	0.00276805	0.000965674	0.0032662	0.00324792	0.0036611	0.00216642	0.00314725	0.00117311	0.000817538	0.00220636	0.00243443	0.00182882	0.000773689	0.00122189
GGCTTG	0.00275203	0.00220678	0.00602657	0.00273536	0.00178903	0.00198254	0.00388063	0.00404685	0.00301751	0.00274365	0.00308827	0.00163317	0.00421656	0.00194119	0.00283874	0.00319695	0.00294842	0.00148452	0.0013784	0.00175393	0.00325618	0.000843393	0.00259158	0.00131691	0.00231488	0.00112845	0.00432879	0.00108347	0.00176342	0.00057398	0.00426504	0.000513168	0.00191622	0.000322673	0.000975681	0.00276805	0.00103841	0.00326556	0.00326142	0.00368176	0.00217504	0.00317508	0.00117406	0.000862272	0.00220636	0.00245965	0.00182882	0.00079563	0.00122189
AGGCTT	0.00402937	0.0026522	0.00667726	0.00309004	0.00327194	0.00215995	0.0047955	0.0047226	0.00396941	0.00330928	0.00340537	0.00213407	0.00484003	0.00249556	0.00388964	0.00313505	0.00416452	0.00189008	0.00318824	0.00203956	0.00425117	0.0010471	0.00324071	0.00158902	0.00263423	0.00172964	0.00466651	0.00161768	0.00249701	0.000815955	0.00512689	0.000664926	0.00389008	0.000790792	0.00145508	0.0039511	0.00237564	0.00353996	0.00361657	0.00384873	0.00283813	0.00394685	0.00208555	0.00129101	0.00253443	0.0030306	0.00330929	0.00181428	0.0026479
CAGGCT	0.00422495	0.00364785	0.00720092	0.00418687	0.00400291	0.00392128	0.005294	0.00571701	0.00456797	0.00457038	0.00386182	0.00388188	0.00522455	0.0046377	0.00465063	0.0039319	0.00436882	0.005135	0.00315456	0.00289616	0.00511712	0.00443159	0.0039885	0.00380685	0.00299025	0.00264004	0.00478926	0.00226254	0.00356109	0.00274416	0.00536594	0.000831677	0.0041406	0.00266663	0.0021022	0.00526867	0.00394299	0.00490913	0.00488224	0.00491071	0.00347523	0.00550667	0.00252801	0.00240065	0.00340269	0.00391121	0.00391022	0.00286125	0.00287108
TCAGGC	0.0042037	0.00366225	0.00722489	0.00421324	0.00396902	0.00393337	0.00527526	0.00571207	0.00459003	0.00457429	0.00386182	0.00388197	0.00507699	0.00465797	0.00467752	0.0039319	0.00436882	0.00513935	0.00318656	0.00288768	0.00517319	0.00443512	0.00402107	0.00380685	0.00298169	0.00265779	0.00480455	0.00224586	0.00356109	0.00274416	0.00538396	0.000819715	0.00414092	0.00267611	0.00211919	0.0052352	0.00394306	0.00492647	0.00488224	0.00490172	0.00349193	0.00554037	0.00255543	0.00240065	0.00339826	0.00392353	0.00392216	0.00287027	0.00287108
ATCAGG	0.00465871	0.00291166	0.0073538	0.0030287	0.00398437	0.00190635	0.00535747	0.00409652	0.00522395	0.00341075	0.00418719	0.002088	0.00503032	0.00207935	0.00378226	0.00334744	0.00442761	0.00192214	0.00346597	0.00196998	0.00460377	0.000880481	0.00426416	0.00173299	0.00424844	0.00164904	0.00599858	0.00267236	0.00437761	0.00114462	0.00502413	0.00174629	0.00475246	0.000900655	0.00169136	0.00253693	0.00376961	0.00350535	0.00373915	0.00378615	0.00264875	0.0041662	0.00459639	0.00142978	0.00244291	0.00311383	0.00479751	0.00305522	0.00422914
GATCAG	0.00411654	0.00265629	0.00257059	0.00262955	0.00373096	0.000453751	0.00265668	0.00305289	0.00452652	0.00256575	0.00404121	0.00182823	0.00189609	0.000776978	0.00357995	0.00280936	0.00394417	0.00160866	0.00355025	0.00129872	0.00463434	0.000336342	0.00589961	0.00187253	0.00454147	0.00113929	0.00676835	0.00203452	0.00555016	0.000940259	0.00279547	0.000526868	0.0046947	0.000701063	0.0020041	0.00129023	0.00453029	0.00245959	0.00341223	0.00248487	0.00489695	0.00379844	0.00498729	0.0012284	0.00191574	0.00216845	0.00546462	0.00354842	0.00539101
GGATCA	0.00410162	0.002661	0.00257059	0.00257712	0.00378953	0.000471831	0.00265668	0.00305839	0.00452652	0.00256575	0.00404121	0.00179533	0.00194826	0.000794475	0.00359028	0.00280936	0.00394417	0.00160866	0.00355025	0.00130828	0.00463434	0.000336342	0.00592139	0.00188028	0.00462194	0.00113927	0.00676835	0.00203035	0.00560162	0.000956288	0.00277763	0.000532641	0.0046947	0.000727457	0.00201799	0.00129023	0.00470625	0.00245528	0.00342443	0.00247819	0.00491577	0.00379381	0.00502602	0.00125168	0.00190615	0.00217677	0.00547782	0.00357125	0.00539101
TGGATC	0.00410162	0.00267128	0.00257059	0.00258588	0.0038075	0.000471831	0.00267532	0.00306885	0.00453788	0.00256968	0.00406288	0.00177316	0.00194826	0.000791198	0.00360038	0.00280936	0.00391546	0.00160866	0.00355025	0.0013177	0.00463555	0.000336342	0.00592211	0.00188028	0.00462268	0.00113478	0.00679821	0.00203035	0.00565188	0.000971291	0.00277759	0.000526684	0.00472491	0.000727457	0.00201131	0.00129023	0.00472103	0.00246859	0.00343663	0.00247819	0.00491577	0.00378828	0.00499549	0.00125168	0.00191945	0.00217671	0.00544273	0.0035906	0.00551205
CTGGAT	0.00440734	0.00267596	0.00338769	0.00256873	0.00441587	0.000453751	0.00403723	0.0030688	0.00529333	0.00258926	0.0044708	0.00176746	0.00389892	0.000804746	0.00385814	0.00280936	0.00438897	0.00165439	0.00361673	0.0013351	0.00463555	0.000347213	0.00594793	0.00189729	0.00479954	0.00129541	0.00678345	0.00204737	0.00565188	0.0009854	0.00410289	0.00057353	0.00544394	0.000727457	0.0022665	0.00129023	0.004626	0.00246411	0.00376501	0.00247819	0.00489733	0.00381114	0.00504983	0.00128586	0.00191945	0.00224853	0.00557342	0.00365948	0.00565927
GCTGGA	0.00440719	0.00268546	0.00338769	0.00255107	0.00443889	0.000453751	0.00394482	0.00307858	0.00530581	0.0025813	0.0044708	0.00177301	0.00390708	0.000794526	0.00384904	0.00280936	0.00438897	0.00165949	0.00361673	0.00132663	0.00463555	0.000340049	0.00593569	0.00187458	0.00479752	0.00125556	0.00676098	0.00204737	0.00569813	0.000971389	0.00408482	0.000550291	0.0054592	0.000732024	0.0022703	0.0013237	0.004621	0.00246845	0.00376501	0.00247819	0.00487868	0.00381114	0.00504983	0.00125168	0.00191503	0.00220233	0.00557342	0.00365954	0.00565927
GGCTGG	0.00300006	0.00395034	0.00269243	0.00437012	0.00317814	0.00566324	0.00237758	0.00547967	0.00358484	0.00496416	0.00344669	0.00646041	0.00177738	0.00496314	0.00401503	0.00569442	0.00316612	0.00565448	0.0024974	0.00376764	0.00516258	0.00558351	0.0046596	0.00553604	0.00260574	0.00292115	0.00633012	0.00295507	0.00416891	0.00583138	0.00272801	0.00124519	0.00301964	0.00668229	0.00192885	0.0053756	0.00391512	0.00478834	0.00428098	0.00488939	0.00393067	0.00503028	0.00302131	0.00484669	0.00379181	0.00318252	0.0036373	0.00304442	0.00270529
TGGCTG	0.00371497	0.00502516	0.00288586	0.00489645	0.00404152	0.00608735	0.00263774	0.00672563	0.00426007	0.0060837	0.00384834	0.00706038	0.00245828	0.00598027	0.00544287	0.00594451	0.00561884	0.00694002	0.00329931	0.00464675	0.00561934	0.00586775	0.00493363	0.0057228	0.00337418	0.00383907	0.0065698	0.0049214	0.0045744	0.00606558	0.00313033	0.00374051	0.00314198	0.00693741	0.00201121	0.00554383	0.004405	0.00596419	0.00470813	0.00640034	0.00517958	0.00595969	0.00322116	0.0049671	0.00430801	0.00412867	0.0040591	0.00417384	0.00266924
ATGGCT	0.00332213	0.00288215	0.00213965	0.00271098	0.00240135	0.000632564	0.00177556	0.00396641	0.00330774	0.0032999	0.00302443	0.00226087	0.00157387	0.00171764	0.00398477	0.0024953	0.00538177	0.00240076	0.00331059	0.00207619	0.00371526	0.000482476	0.00361614	0.00119484	0.00276434	0.00139657	0.00592443	0.00338229	0.00244648	0.000603999	0.00239619	0.00300692	0.00281328	0.000855217	0.0011934	0.00132614	0.0017878	0.00347532	0.00341793	0.00398774	0.00397557	0.00408647	0.00171501	0.000447373	0.00226967	0.00266033	0.00258207	0.00237392	0.00208386
CATGGC	0.00327857	0.00278889	0.00213965	0.00271079	0.00233803	0.00061442	0.0017376	0.00394148	0.00322832	0.00323335	0.00300321	0.00185043	0.00154862	0.00165701	0.00391973	0.00246369	0.00538177	0.00239168	0.00326119	0.00205842	0.00364852	0.000460311	0.00356353	0.00118086	0.00276434	0.00140497	0.00583423	0.00325463	0.00240023	0.000487244	0.00235082	0.00298306	0.00276636	0.000383002	0.00116933	0.00132614	0.00167797	0.00343983	0.00339391	0.00391221	0.00393346	0.003727	0.00164049	0.000393112	0.00224685	0.00253546	0.00261716	0.0021955	0.00192451
GCATGG	0.00330731	0.00278889	0.00223921	0.0027196	0.00241365	0.000583927	0.00175614	0.0039825	0.00322832	0.00323729	0.00302488	0.00185043	0.00171933	0.00157214	0.00391973	0.00246369	0.00538177	0.00239629	0.00308531	0.00205842	0.00362644	0.000464365	0.00357803	0.00118097	0.00277377	0.00143127	0.00584191	0.00324641	0.00244648	0.000599218	0.00237017	0.00299472	0.00276636	0.000526375	0.00115589	0.00125885	0.00165789	0.00345345	0.00348898	0.00389907	0.0039422	0.00373248	0.00162744	0.000448122	0.00223799	0.00251913	0.00262885	0.00221102	0.00192451
AGCATG	2.84815e-05	0	0	0	5.42773e-06	0	3.69906e-05	5.99759e-05	0	1.15013e-05	2.16666e-05	5.52184e-06	8.15607e-06	1.0057e-05	0	6.24005e-05	0	1.34466e-05	0	0	2.21899e-05	7.64596e-06	7.24874e-06	1.02695e-05	9.42974e-06	3.51109e-05	0	1.25169e-05	0	9.35709e-06	1.93538e-05	2.32389e-05	0	1.86303e-05	3.47585e-06	0	1.95648e-05	2.64997e-05	2.31822e-05	6.67269e-06	1.67444e-05	3.87733e-05	0	1.121e-05	8.92584e-06	4.68994e-06	0	9.56702e-06	0
CAGCAT	4.95853e-05	2.3902e-05	0	8.99264e-06	1.10251e-05	0	1.89322e-05	1.51965e-05	0	0	2.16666e-05	5.52184e-06	1.65279e-05	3.29393e-06	0	6.24005e-05	0	8.95666e-06	0	0	1.1095e-05	4.05404e-06	7.24874e-06	3.5197e-06	9.42974e-06	2.19507e-05	8.3531e-06	1.25169e-05	0	9.35709e-06	1.93538e-05	0	0	4.78746e-06	3.89212e-06	0	0	4.81132e-06	1.12984e-05	6.67269e-06	1.67444e-05	3.87733e-05	7.63126e-06	0	4.47451e-06	4.68994e-06	0	9.55182e-06	0
CGCAGC	0.000751593	0.00107545	0.000218287	0.000517403	0.0010164	0.00043599	0.000431354	0.0011972	0.0006577	0.000927808	0.000253813	0.000600267	0.000697907	0.00105444	0.00152974	0.00040853	0.00245242	0.00121356	0.00081787	0.000897319	0.000488358	0.00027689	0.000459903	0.000186943	0.000899459	0.000865229	0.000264423	0.00113836	0.000501404	0.000248989	0.000525021	0.00131203	0.000122332	0.000302621	0.000275737	0.000168226	0.000550708	0.0011406	0.000473918	0.00147011	0.001249	0.000888919	0.000273198	0.000121378	0.000516364	0.000819202	0.000435154	0.000996255	8.30038e-05
ACACGC	0.00306715	0.00198148	0.00227768	0.00247813	0.00197314	0.000170939	0.00175008	0.00286486	0.00284368	0.00204292	0.00187794	0.0014043	0.000878841	0.000540245	0.00276918	0.0022083	0.00389717	0.00108634	0.00357988	0.00138895	0.00330671	0.000193967	0.00287366	0.000984741	0.00174358	0.000735172	0.00448185	0.00127475	0.00171264	0.000267306	0.00223562	0.000731355	0.00285594	0.00017163	0.000781733	0.00122431	0.000842171	0.00229424	0.00368541	0.00244249	0.0023471	0.00289452	0.00102324	0.000338401	0.00229542	0.00165664	0.00200212	0.0006339	0.00174189
GACACG	0.00243989	0.00249016	0.00179836	0.0026528	0.00121232	0.00319606	0.00149752	0.00366518	0.002133	0.00246123	0.00188645	0.00374367	0.00121239	0.00195776	0.00230729	0.00419685	0.00242592	0.00182669	0.00158989	0.00252543	0.00289899	0.00100563	0.00257628	0.00234307	0.00164862	0.00149386	0.00427573	0.0014547	0.00194848	0.00351454	0.00203986	0.0010846	0.000811236	0.00157074	0.000465261	0.00309003	0.000796959	0.00319984	0.00274773	0.00327979	0.00220036	0.00274261	0.000930015	0.00243678	0.00273601	0.00187021	0.00160677	0.00086237	0.000546428
AGACAC	0.00227392	0.00151343	0.00162462	0.00208399	0.000737812	0.000106105	0.00119104	0.00265506	0.00188208	0.00158666	0.00156189	0.00117647	0.000656136	0.000494094	0.00203777	0.0019595	0.00242592	0.00100998	0.00136546	0.00102193	0.00287536	0.000165176	0.00228005	0.000893121	0.00144593	0.00043088	0.00409982	0.000912513	0.00167216	0.000238636	0.00166366	0.000452728	0.000749136	2.78803e-05	0.00021615	0.00109063	0.000462329	0.00222895	0.00276957	0.00236849	0.00212358	0.00240032	0.000671164	0.000294723	0.00170738	0.00138268	0.00147449	0.000486467	0.000434838
CAGACA	0.00412276	0.00264051	0.00193901	0.00281141	0.00100685	0.000188614	0.00212046	0.00460327	0.00291258	0.00234588	0.00278645	0.0017929	0.00103347	0.000747776	0.00378372	0.00233277	0.0045337	0.0015041	0.00229612	0.00141417	0.00517083	0.000165176	0.00432962	0.00147393	0.00258602	0.000561291	0.00696222	0.00104586	0.0026131	0.000280818	0.00269193	0.000533722	0.000794922	3.73791e-05	0.000256674	0.00105609	0.000739724	0.00282309	0.00542436	0.00298942	0.00420757	0.00370661	0.00106956	0.000327482	0.00184974	0.00142888	0.00221179	0.000577106	0.000506154
TTCAGA	0.00247197	0.00319726	0.00192216	0.00339905	0.00127031	0.00386216	0.00174772	0.00447635	0.00216976	0.00334775	0.00186512	0.00564919	0.00151628	0.00287843	0.00250379	0.00528478	0.00242592	0.00223188	0.00136572	0.00279738	0.00317314	0.00213792	0.00266001	0.00350127	0.00169215	0.00210555	0.004431	0.00189144	0.00240957	0.00449684	0.00202155	0.00147942	0.000780713	0.00472228	0.000569258	0.00430505	0.000932316	0.0034755	0.00274773	0.00389729	0.00229312	0.00318209	0.00150884	0.00455762	0.00335011	0.00235993	0.00196619	0.00114389	0.000509231
CTTCAG	0.00423825	0.0035334	0.00268505	0.00459586	0.00113779	0.000730038	0.00244669	0.00580279	0.0030845	0.0035672	0.00300735	0.0041507	0.00138557	0.00161335	0.00418342	0.00478313	0.00462	0.00227559	0.0023776	0.00214697	0.00509434	0.000752679	0.00454097	0.00231369	0.00276895	0.00112461	0.00706745	0.00181005	0.00329853	0.0012907	0.00279154	0.00134157	0.000948379	0.000916736	0.00047248	0.00300772	0.00109102	0.00461902	0.00546064	0.00494479	0.00433657	0.00541356	0.00133339	0.00144595	0.00387018	0.00328031	0.0029103	0.00134098	0.000698461
CCTTTA	0.00222464	0.00144185	0.00162232	0.00207575	0.00116043	0.000118044	0.00109957	0.00249771	0.00176081	0.00154442	0.00151946	0.00115998	0.000639825	0.000481473	0.00210411	0.00180358	0.00251206	0.000973662	0.001445	0.000962701	0.00332147	0.000157941	0.00227503	0.000900827	0.00137174	0.000404501	0.00408667	0.000879349	0.00153936	0.000243448	0.0016281	0.000417771	0.000718051	6.5801e-05	0.000195759	0.000953407	0.000623235	0.00208069	0.00257836	0.00208029	0.00229491	0.00226089	0.000706561	0.000272827	0.00159168	0.00133252	0.00160808	0.000478236	0.000436356
TCCTTT	0.00326285	0.00245447	0.00506571	0.00337228	0.00229083	0.000641421	0.00222779	0.00471608	0.00309418	0.00270615	0.00298433	0.00269142	0.00179191	0.00115377	0.00316792	0.00307036	0.00373061	0.00160985	0.00239651	0.00156607	0.00439468	0.0006047	0.00530756	0.00225564	0.00248643	0.00105581	0.00816541	0.00148147	0.00263484	0.00121039	0.00306342	0.00110879	0.00247464	0.000698352	0.00106023	0.00219939	0.00116788	0.00264601	0.00560029	0.00314712	0.00267011	0.00283643	0.00158173	0.00127063	0.00239372	0.00207538	0.00264271	0.000974748	0.00227468
GTCCTT	0.00317593	0.00344266	0.00221087	0.00368864	0.00307833	0.00556302	0.00201216	0.00464954	0.00256692	0.0039248	0.00246746	0.00578628	0.00163652	0.00490752	0.00337345	0.00511863	0.00352419	0.00357663	0.00252591	0.00305104	0.00473259	0.00512125	0.00533131	0.00524401	0.00195148	0.00267228	0.00784464	0.00259746	0.0030032	0.00487719	0.0025626	0.00140519	0.00282353	0.00602081	0.00114335	0.0051997	0.00230822	0.00380348	0.00568752	0.00513421	0.00311029	0.00316175	0.0021205	0.0048662	0.00353199	0.00251585	0.00298714	0.00188218	0.00253059
AGTCCT	0.00276497	0.00166348	0.00189149	0.00232947	0.00187303	0.00012967	0.00134458	0.00273776	0.00218307	0.00183056	0.00161005	0.00120517	0.000738589	0.00056044	0.00256605	0.00221335	0.00346569	0.000996819	0.0024131	0.00114253	0.00292021	0.000223348	0.00289055	0.000968645	0.00165647	0.000491969	0.00444433	0.00104846	0.00189766	0.000253548	0.00144077	0.000522212	0.00274577	8.50755e-05	0.000322198	0.00115703	0.000800164	0.00232943	0.00299805	0.00246273	0.00232883	0.00252983	0.000868818	0.00033863	0.0018064	0.00149353	0.00212298	0.000915872	0.00153646
AAGTCC	0.00229112	0.00165731	0.00164834	0.00206921	0.000776645	0.000445293	0.00126986	0.00272087	0.00179528	0.00188786	0.0015208	0.00134865	0.000707117	0.000931818	0.00200089	0.0020913	0.00259881	0.000979842	0.00155771	0.00111654	0.00281929	0.000316779	0.00226779	0.00098762	0.00143001	0.000514944	0.0041604	0.00092198	0.0014869	0.000837524	0.00138622	0.000552395	0.000734335	0.000332959	0.000368617	0.00202825	0.000443114	0.00210497	0.00268926	0.0024339	0.00214214	0.00235769	0.000692445	0.000553683	0.00177151	0.00150613	0.00145223	0.000486388	0.000397641
AAAGTC	0.00440798	0.00244354	0.00186115	0.00340664	0.0018302	0.00252799	0.00308536	0.00337272	0.00253918	0.002513	0.00372769	0.00304872	0.00280507	0.00341445	0.00264554	0.00268434	0.00346094	0.00261502	0.0020697	0.00159123	0.00300664	0.00442187	0.00372844	0.0039614	0.00270107	0.00196143	0.00426737	0.00176046	0.00190689	0.00220526	0.00255407	0.00159597	0.00203065	0.00423025	0.00207297	0.00181334	0.000988387	0.00261816	0.00344646	0.00335291	0.00429852	0.00312306	0.00177445	0.00282001	0.00258853	0.00261346	0.00173403	0.000961749	0.00100951
AAAAGT	0.00315661	0.00187812	0.0025171	0.00247353	0.00219676	0.000530735	0.00168309	0.00276802	0.00275863	0.00201666	0.00193627	0.00134386	0.00110679	0.000884119	0.00251116	0.00206163	0.00369435	0.00121065	0.00271671	0.00115743	0.0032125	0.00043409	0.00319898	0.0013066	0.00188821	0.000868297	0.00489607	0.00142642	0.00172885	0.000552721	0.00206109	0.000536669	0.00246393	0.000445528	0.000700691	0.00117448	0.00090436	0.00216361	0.00286163	0.00218162	0.00357425	0.00281792	0.00138754	0.000737256	0.00174663	0.00176612	0.00191626	0.000830659	0.00162441
CAAAAG	0.00331084	0.00277839	0.00256504	0.00309975	0.00360473	0.00455379	0.00195149	0.00334926	0.00346161	0.00311192	0.0027329	0.00342289	0.00169717	0.00378998	0.00291979	0.00378966	0.00397153	0.00267984	0.00294075	0.00248054	0.0036886	0.00415835	0.00408561	0.00384262	0.00225005	0.00206753	0.00532337	0.00214941	0.00311814	0.00434828	0.00291333	0.000728862	0.00444748	0.00408209	0.00144099	0.00300056	0.00200962	0.00299824	0.00318315	0.00365467	0.00429491	0.00299807	0.00257435	0.00365348	0.00261297	0.00207667	0.00309433	0.00188442	0.00310159
ACAAAA	0.00251927	0.00246279	0.00183548	0.00276469	0.00177236	0.00437129	0.00148255	0.00319586	0.00266219	0.00267226	0.00267933	0.00339362	0.00125153	0.00363783	0.00219974	0.00349678	0.00289898	0.00255729	0.00179074	0.00237995	0.00292326	0.00410341	0.00286093	0.00347476	0.00191056	0.00176813	0.00457042	0.00150206	0.00214195	0.00430191	0.00237616	0.000679147	0.0022874	0.00413809	0.0011581	0.00284844	0.00123091	0.00292836	0.00280436	0.00363337	0.00219873	0.00241051	0.00193942	0.00342347	0.0025293	0.0017665	0.00211935	0.00100994	0.00141386
GACAAA	0.00192085	0.00137125	0.00089648	0.00191908	0.0003028	0.000100183	0.000857451	0.00245939	0.00109571	0.00133092	0.00141494	0.00112745	0.000377339	0.000464887	0.00191961	0.00174368	0.00219423	0.000943274	0.0010292	0.00086035	0.0022419	0.000154399	0.00193626	0.000811902	0.00123183	0.00039618	0.00296632	0.000729051	0.00135172	0.000210904	0.00102853	0.000394734	0.000611843	3.25192e-05	5.75021e-05	0.000989145	0.000360277	0.00196991	0.0026039	0.00212184	0.00202733	0.00219188	0.000451718	0.000240063	0.00151871	0.00124463	0.0012297	0.000436545	0.000181357
TGACAA	0.00180762	0.00134386	0.000823844	0.00191036	0.000249403	0.000106074	0.000837467	0.00242169	0.00108477	0.00131912	0.00126688	0.00111632	0.0002869	0.000455093	0.00190387	0.00174368	0.00219423	0.00093427	0.00094661	0.000843306	0.00225588	0.000150862	0.00197492	0.00080626	0.00114905	0.000391831	0.00272931	0.000583553	0.0013069	0.000205974	0.00102814	0.000394734	4.57851e-05	1.394e-05	3.37132e-05	0.000989145	0.00029462	0.0019617	0.00262928	0.00209497	0.00201	0.00214193	0.000399452	0.000240063	0.00147394	0.00123622	0.00119448	0.00043103	0.000108513
CTGACA	0.00180046	0.00133309	0.00084831	0.00191912	0.000217869	0.000111996	0.000837467	0.0024401	0.00109618	0.00135531	0.00128777	0.00112198	0.0002869	0.000459102	0.00191189	0.00180608	0.00219423	0.000947883	0.000994242	0.000880305	0.00225432	0.00016181	0.0019241	0.000794689	0.00114083	0.000405495	0.00270453	0.000599564	0.0013069	0.000201247	0.00102814	0.000388902	4.57851e-05	1.85548e-05	4.0521e-05	0.00102262	0.000272527	0.00196636	0.00261566	0.00212331	0.00201	0.00216417	0.00038549	0.000240063	0.00149619	0.00124936	0.00119448	0.000424373	0.000108513
TCCCTG	0.00260497	0.00289853	0.00163625	0.00310824	0.00143796	0.00177617	0.00208138	0.00449198	0.00265897	0.00329058	0.00224451	0.00186947	0.00191225	0.0018471	0.00305585	0.00369955	0.00261966	0.00363937	0.00160257	0.00248689	0.00411758	0.00129566	0.00413015	0.00207809	0.00330644	0.00145442	0.00396034	0.0012824	0.00438601	0.00126768	0.00128997	0.000509041	0.000560083	0.000770014	0.000814596	0.00236981	0.00386817	0.00423928	0.00388391	0.00388519	0.00318165	0.00433582	0.00376328	0.00142696	0.00247664	0.00303193	0.00363324	0.00290167	0.00222041
CTTCCC	0.0034181	0.00326936	0.00266193	0.00275926	0.00344584	0.00203067	0.00256265	0.00469154	0.00429601	0.00388781	0.00389993	0.00195293	0.0019283	0.00226893	0.00327848	0.00366063	0.00346303	0.00213283	0.00397193	0.00236604	0.00463511	0.00105891	0.00586659	0.0021636	0.00505081	0.00182146	0.00722883	0.00214858	0.00556507	0.00119821	0.00265708	0.000673064	0.00347055	0.000687398	0.00283195	0.00379227	0.00501641	0.00351162	0.00289951	0.00369149	0.00486735	0.00436023	0.00480567	0.00191597	0.00258159	0.00330698	0.00504605	0.00392224	0.00472416
TTTCTT	0.00261137	0.00195431	0.00181255	0.00203421	0.00183713	0.000449019	0.00201547	0.00289808	0.00294019	0.00196206	0.00244135	0.00129848	0.00137004	0.000733049	0.00244643	0.00216676	0.00242561	0.00155882	0.00198249	0.00112319	0.00443136	0.000321664	0.00366921	0.00160265	0.00376031	0.00108204	0.00554036	0.00134256	0.00430936	0.000773527	0.00199456	0.000461516	0.00141601	0.000439878	0.001241	0.0013248	0.00344075	0.00220555	0.00264498	0.00218348	0.00388413	0.0027616	0.00342496	0.00116256	0.00168254	0.00165758	0.00415376	0.00224931	0.00309594
TTTTCT	0.00262687	0.00234476	0.001756	0.00257245	0.00151871	0.000914266	0.00170598	0.00328693	0.00231405	0.00234339	0.00201305	0.00272876	0.00149078	0.00121249	0.0024493	0.00291336	0.0023969	0.00179579	0.00188703	0.00145482	0.00368897	0.00060099	0.00368735	0.0021316	0.00282359	0.0013114	0.00485567	0.00141266	0.00387211	0.00148316	0.00177613	0.000926316	0.00112412	0.00109777	0.00123656	0.0024654	0.00330496	0.00236827	0.00272621	0.0024422	0.00377134	0.00303168	0.002894	0.0018706	0.00223383	0.00197992	0.00371506	0.00204963	0.00249475
CTTTTC	0.00307561	0.00197512	0.00193857	0.00265078	0.00184688	0.000378691	0.00159097	0.00282636	0.00222926	0.00180856	0.00199709	0.00176423	0.00123786	0.000779853	0.00272183	0.00230984	0.00343654	0.00120498	0.00262235	0.00115413	0.00272572	0.000375001	0.00297639	0.00113818	0.00190917	0.000707297	0.00410367	0.00124892	0.00153122	0.000575862	0.00216926	0.000695058	0.00273605	0.000377486	0.000685687	0.00136565	0.000890271	0.00234415	0.00313685	0.002457	0.00226814	0.00252955	0.00114211	0.000777316	0.00190531	0.00179394	0.00193023	0.000849112	0.00135214
CCTTTT	0.00311396	0.00250711	0.0025499	0.00289952	0.0020813	0.000991661	0.00206402	0.0033767	0.00232387	0.00277539	0.00281382	0.00283218	0.00165048	0.00156088	0.00299873	0.00317395	0.00334916	0.00166672	0.00236074	0.00158673	0.00326724	0.000804632	0.00308846	0.00178197	0.00212627	0.0012122	0.00425647	0.00131912	0.00236261	0.00211032	0.00264545	0.00102966	0.00195334	0.00103679	0.00103949	0.00309616	0.000968716	0.00256514	0.00310215	0.00279471	0.00226003	0.00280575	0.00136137	0.00156568	0.00237434	0.00235819	0.00223584	0.000840017	0.00183122
GCCCTT	0.00181292	0.000974528	7.27618e-05	0.000166046	0.000235258	9.4608e-05	0.000948058	0.00050744	0.000863926	0.000636523	0.00124453	0.000600098	0.000402892	0.000273967	0.00182101	0.000249464	0.00210855	0.000341677	0.000949359	0.000383813	0.00173114	7.27937e-06	2.54083e-05	5.49442e-05	0.00117312	0.000170454	0.000188151	0.000204122	0.00121608	0.000690727	0.00121615	9.29151e-05	7.6388e-05	3.79467e-05	5.77306e-05	6.88971e-05	0.00026849	0.000615565	7.05356e-05	6.67685e-05	0.00181916	0.00128439	0.000412047	5.49526e-05	0.000160638	6.71607e-05	0.000771392	0.00017808	7.26551e-05
CGCCCT	0.00177798	0.000979601	7.27618e-05	0.000131398	0.000229541	8.8462e-05	0.000873983	0.000472907	0.000819153	0.000605545	0.00118212	0.000560949	0.000360942	0.00024043	0.00174879	0.000217517	0.00205005	0.0002741	0.000917277	0.000375156	0.00170877	7.24056e-06	6.35199e-06	3.40971e-06	0.0011321	0.000139548	0.000119956	1.66603e-05	0.00112621	5.18144e-05	0.00103699	6.95667e-05	6.10468e-05	0	2.01554e-05	0	0.000209228	0.000555094	2.37676e-05	4.6849e-05	0.00182742	0.00126212	0.000378713	4.36221e-05	0.000129162	4.61579e-05	0.000725471	0.000112002	7.26551e-05
CCGCCC	0.00223757	0.00101845	0.000198583	0.000221372	0.000754674	0.000124468	0.000949616	0.000542705	0.000819153	0.000671922	0.00126702	0.0006874	0.00040255	0.000321678	0.00199803	0.000217517	0.00205005	0.000338477	0.00108047	0.000393707	0.00227721	0.000143847	0.000117419	7.62863e-05	0.00119121	0.000166104	0.000303731	0.000200369	0.00135343	9.49881e-05	0.00107477	0.000110093	6.10468e-05	0.000238599	6.06942e-05	0.00010362	0.000693033	0.000578316	3.59675e-05	0.000300161	0.00187758	0.00132789	0.000522077	7.6615e-05	0.000147181	7.16726e-05	0.00121783	0.000225896	0.000222416
CCCGCC	0.00252481	0.0011801	0.000507023	0.000402906	0.00117034	0.000100496	0.00124655	0.000497421	0.00148175	0.000808767	0.00145675	0.00056644	0.000992601	0.000266939	0.00226362	0.000279436	0.00300232	0.000278684	0.00163818	0.000392244	0.00195251	3.68745e-06	0.000331826	3.05286e-05	0.00128995	0.000192029	0.000382626	0.000458232	0.00135195	4.2182e-05	0.00155549	8.68838e-05	0.00160246	2.37347e-05	0.00013482	0	0.00032141	0.000594247	8.35028e-05	0.000170187	0.00196795	0.00148927	0.000578874	3.27588e-05	0.000178149	5.45658e-05	0.00118223	0.000144034	0.00108946
CCCCGC	0.00192398	0.00105241	0.000123435	0.000248591	0.000847185	0.000107225	0.00100802	0.000547604	0.000852924	0.000652713	0.00161491	0.000663603	0.000575667	0.000311992	0.002202	0.000249464	0.00207907	0.000338725	0.000898654	0.000375156	0.00231398	1.48369e-05	0.00022287	0.000117913	0.00123456	0.000201449	0.000342793	0.000199584	0.00158923	7.22475e-05	0.00122048	8.12031e-05	0.000124081	9.52399e-06	0.000141625	0	0.000758795	0.000657376	6.03713e-05	0.000102773	0.00224245	0.00130239	0.000716919	4.39095e-05	0.00013816	8.06381e-05	0.0011835	0.000245088	0.000408801
ACCCCG	0.0020335	0.00107087	7.27618e-05	0.000148694	0.000332559	9.42358e-05	0.000930004	0.000522539	0.000940195	0.000632253	0.0013296	0.00057715	0.000539324	0.000260846	0.00181015	0.000247547	0.0021365	0.000283174	0.000930905	0.000384888	0.00171988	1.11267e-05	3.17932e-05	3.8567e-05	0.00121529	0.000134809	0.000172697	4.15274e-05	0.0010802	5.60456e-05	0.00111683	9.28059e-05	0.000107511	1.37734e-05	2.0087e-05	0	0.000228564	0.000576328	4.81411e-05	7.32699e-05	0.00195051	0.00132847	0.000446425	5.432e-05	0.000160561	5.02756e-05	0.000713961	0.000138633	3.62332e-05
AACCCC	0.00262199	0.00120948	0.000318832	0.000770478	0.000468417	0.000111911	0.00113572	0.000609851	0.00101646	0.000727683	0.00152322	0.000649189	0.000739442	0.000409686	0.00186377	0.000277577	0.00222251	0.000360092	0.00104491	0.000436069	0.00179027	9.3589e-05	0.0001031	7.63524e-05	0.00132393	0.000230359	0.000248042	0.000108019	0.0010802	9.02576e-05	0.00183742	0.000318682	0.000139035	9.36397e-05	0.000105423	0	0.000269552	0.00060219	0.000166367	0.000153006	0.00198271	0.00137198	0.000514919	0.000121514	0.000217661	7.61353e-05	0.00081417	0.000220817	0.000107958
TAACCC	0.00249657	0.00116004	0.000339475	0.000761989	0.00029642	9.44462e-05	0.00111708	0.00198297	0.00130586	0.000796028	0.0012861	0.000726794	0.000443784	0.000243593	0.00183685	0.000494163	0.00216522	0.00051661	0.000994988	0.000383678	0.00234063	7.18558e-06	0.00210818	0.000611202	0.00120499	0.000170089	0.00280024	0.000175181	0.00112621	5.14641e-05	0.00145152	0.000133451	9.22957e-05	9.30443e-06	0.000118532	0	0.000272934	0.000654668	0.00267548	0.000647168	0.0021151	0.00132799	0.000424976	3.27588e-05	0.000203836	5.87916e-05	0.000749542	0.000130505	0.000180238
TTAACC	0.00251027	0.00125929	0.000749425	0.00129436	0.000330371	0.000130199	0.00132278	0.00205525	0.00174841	0.00105982	0.00147489	0.000770863	0.000492637	0.000374786	0.001977	0.000526053	0.00216537	0.000619464	0.00101086	0.000527769	0.00281779	2.85164e-05	0.00236333	0.000760532	0.00130663	0.000221602	0.0036592	0.000403863	0.00117173	0.000116899	0.00222889	0.00101471	6.05866e-05	3.24054e-05	0.000580836	6.72902e-05	0.00030111	0.000714772	0.00274658	0.000700257	0.00219628	0.00148816	0.000504704	9.72824e-05	0.000264872	0.000260577	0.000893405	0.000220722	0.000216471
TATTAA	0.00281909	0.00209265	0.0014071	0.00163997	0.00148932	0.000571793	0.00153128	0.00308756	0.00242672	0.00194908	0.00188025	0.00119998	0.00129604	0.00133332	0.00324926	0.000684796	0.00470543	0.00174679	0.00166856	0.00125315	0.0031528	0.000254974	0.00264388	0.000869144	0.00213257	0.0011173	0.00442957	0.00234617	0.00157628	0.000313908	0.00199533	0.00256528	0.000795001	0.00022744	0.000199167	0.000168226	0.000925516	0.00178741	0.00321083	0.00215683	0.00320924	0.00221296	0.000772118	0.000185083	0.000703466	0.00110641	0.00125284	0.00112068	0.000362151
GTATTA	0.00221792	0.00151979	0.00133359	0.00182264	0.000715712	0.000147283	0.00115376	0.00228897	0.00179591	0.0014996	0.00145704	0.00103446	0.000664335	0.000559973	0.00189224	0.00171179	0.00251266	0.000992018	0.00138125	0.00094544	0.00274222	5.02684e-05	0.00235013	0.000791072	0.00154476	0.000430562	0.00430252	0.00098346	0.00135147	0.000238492	0.00161072	0.000382567	0.000764398	3.26423e-05	0.000195671	0.000539382	0.000535991	0.000637964	0.00283122	0.00233502	0.00196842	0.00147898	0.000652668	0.000326931	0.000267338	0.00113863	0.000936618	0.000380461	0.000362151
GGTATT	0.00291238	0.0018626	0.00179496	0.00206782	0.00168398	0.000153174	0.00154516	0.0024252	0.00249109	0.00183007	0.00168794	0.00114957	0.0010418	0.000661592	0.00238106	0.00171179	0.00349394	0.00103255	0.00236124	0.00104762	0.00301914	7.18207e-05	0.00272626	0.00085554	0.00162577	0.000678437	0.00457597	0.00127528	0.00157722	0.000253519	0.00217329	0.000446391	0.00235222	0.000120729	0.000347043	0.000472092	0.00058984	0.000707461	0.00319829	0.00236838	0.00211705	0.00170025	0.000844632	0.00033785	0.000387503	0.00137821	0.00145455	0.000539714	0.0015325
GGGTAT	0.00176439	0.00114193	0.000581227	0.00110469	0.000229415	0.000111935	0.00109794	0.00194831	0.00155156	0.000905159	0.00122455	0.000688638	0.000352701	0.000319027	0.00176572	0.000403911	0.00213665	0.000529755	0.000882529	0.000460243	0.0026196	0	0.00224115	0.000675637	0.00123223	0.000186749	0.00358954	0.000212662	0.0010809	6.5281e-05	0.00145848	0.000110274	4.57851e-05	0	6.07129e-05	0	0.000248251	0.00060422	0.0027126	0.000640842	0.00197664	0.0012733	0.000438846	7.58861e-05	0.00016099	0.0002058	0.000750288	0.000117509	0.000217785
GGGGTA	0.00195864	0.00115674	0.000290421	0.000745592	0.000353829	8.84933e-05	0.000873605	0.00189037	0.00121879	0.000770604	0.001333	0.000723146	0.000360942	0.000254502	0.00187534	0.000404073	0.00225643	0.000499021	0.00097904	0.000375022	0.00233	3.68745e-06	0.00198642	0.000587282	0.00114062	0.000144042	0.00275619	0.000244024	0.00117061	3.74032e-05	0.00108163	8.70336e-05	7.60733e-05	1.87984e-05	9.19382e-05	0	0.000243386	0.000634316	0.00274943	0.000580749	0.00203433	0.00129568	0.000725024	3.27588e-05	0.000165447	6.79149e-05	0.000714955	0.000145725	0.000144746
AGGGGT	0.00205324	0.00127612	0.000245684	0.000771301	0.00034304	0.000100153	0.00092923	0.00195266	0.00103943	0.000835925	0.00133139	0.000756022	0.000393693	0.000336267	0.00190178	0.000434103	0.00231232	0.000562232	0.00101265	0.000417369	0.00248023	4.97169e-05	0.00200523	0.000624391	0.00119144	0.000273956	0.00279404	0.000276788	0.0011267	5.7159e-05	0.00126576	0.000312692	7.66696e-05	4.18727e-05	7.21214e-05	0	0.000274485	0.000607203	0.00286735	0.000646896	0.00208309	0.00133396	0.00078084	6.65008e-05	0.000208733	8.90585e-05	0.000766579	0.00021482	0.000108513
CAGGGG	0.00186445	0.00137009	0.000714258	0.000816658	0.000657856	0.000161064	0.00106819	0.00213043	0.00114402	0.00104307	0.00143819	0.000844668	0.000470071	0.000456182	0.00200601	0.000594597	0.00222342	0.000747805	0.00124346	0.000515006	0.00246799	0.00014657	0.00242654	0.000807002	0.00135481	0.000305045	0.00307057	0.000372794	0.00149791	0.000140551	0.00117326	0.000324605	0.000814419	0.00033158	0.000137614	0.000218663	0.000687854	0.000671861	0.00273278	0.000702121	0.00242427	0.00155719	0.000724153	7.88978e-05	0.000228097	0.0001589	0.00114194	0.00102851	0.000554875
ACAGGG	0.00192102	0.00125188	0.000242499	0.000772392	0.00023484	0.000156237	0.000950962	0.00213039	0.001077	0.000865645	0.00122455	0.000882516	0.00112261	0.0003632	0.00182099	0.000373273	0.00219951	0.000734904	0.00093074	0.00040921	0.00292925	7.42414e-05	0.0039015	0.000966553	0.00118225	0.000198953	0.00541552	0.000256766	0.00112764	0.000114419	0.00105469	0.00010444	0.000248884	0.000240798	9.56584e-05	0.000141817	0.000317374	0.000696903	0.00537654	0.00118244	0.00227402	0.00135313	0.000419206	7.68497e-05	0.000183186	0.000101767	0.000765948	0.000159013	0.000144559
GACAGG	0.00206637	0.00122739	0.000267093	0.000736373	0.00025685	0.000100092	0.000948762	0.0019578	0.00113088	0.000762997	0.00122455	0.000722142	0.00133268	0.000243695	0.00180159	0.000373273	0.00223228	0.000534954	0.000914781	0.000383678	0.00291838	2.50138e-05	0.00392731	0.000917137	0.00119885	0.000156802	0.005424	0.000220627	0.00112621	5.59963e-05	0.00110044	9.28972e-05	0.000374226	9.22943e-06	9.95784e-05	3.51e-05	0.000418188	0.000650648	0.00530579	0.00112149	0.00225758	0.00133418	0.000557628	3.27588e-05	0.000168933	5.89253e-05	0.000761242	0.000144384	0.000144559
AGACAG	0.00204536	0.00175476	0.000987283	0.00142876	0.000691682	0.000179151	0.00123566	0.00273353	0.00170967	0.00145603	0.00148444	0.000901533	0.000495515	0.000378779	0.0024795	0.000884601	0.00231522	0.00255759	0.00103091	0.00115342	0.00318533	0.000501269	0.00280486	0.00111323	0.00147934	0.000527175	0.00287861	0.000449306	0.0019142	0.000373327	0.00125735	0.000128367	0.000296804	0.000285544	0.000321252	0.000207242	0.00144642	0.0018538	0.0039303	0.000949418	0.00273724	0.00259088	0.000745478	0.000155484	0.000539866	0.000564031	0.00131433	0.000792497	0.000220103
ATCAGA	0.0024396	0.00152401	0.000477445	0.00125815	0.000849085	0.000307987	0.00112503	0.00219769	0.00150298	0.00110503	0.00221366	0.000766892	0.000681198	0.000410975	0.00203052	0.00075042	0.00216537	0.000782327	0.00105301	0.000495585	0.00356664	8.86193e-05	0.00338828	0.00104951	0.00212571	0.000661412	0.00355675	0.000875883	0.00263902	0.000374651	0.00196905	0.00011928	0.000387823	0.000169691	0.000729997	0.000152118	0.00124039	0.000721245	0.00277904	0.000634038	0.00399447	0.00195298	0.00114545	0.000558182	0.000302237	0.000357228	0.00168189	0.000850907	0.00161066
CATCAG	0.00324333	0.0020366	0.00589325	0.00210144	0.00170286	0.0018021	0.00393291	0.00363605	0.00263061	0.00276499	0.00320518	0.00154982	0.00402579	0.00199805	0.00266711	0.00303736	0.00297277	0.0015954	0.00156029	0.00131351	0.00369559	0.000799183	0.00256594	0.00121065	0.00212053	0.00136719	0.00338528	0.00185315	0.00183459	0.000701413	0.00441772	0.00142057	0.00227846	0.000436124	0.000988166	0.00190385	0.00103315	0.00332413	0.00330116	0.00351001	0.00226511	0.00349783	0.00139488	0.000770482	0.00229263	0.00220642	0.00226133	0.00106748	0.00182687
AGGTAC	0.00330966	0.0043948	0.00278941	0.00390132	0.00347738	0.00670409	0.00303664	0.0057858	0.00404566	0.00490871	0.00453237	0.00611764	0.00289949	0.00594655	0.00391108	0.00621562	0.00302453	0.00373763	0.00298896	0.00376817	0.00535018	0.00550631	0.0046601	0.0052399	0.00432782	0.00329615	0.00626159	0.00238093	0.00609263	0.00623891	0.00276113	0.00135103	0.00200758	0.00615636	0.00241459	0.00653089	0.00504883	0.00452846	0.00300627	0.00556403	0.00337711	0.00455147	0.00609319	0.00599767	0.00400581	0.00391009	0.00508507	0.00381856	0.00436826
CAGGTA	0.00265254	0.00326984	0.00133104	0.00314556	0.00207623	0.00613722	0.00216153	0.00455134	0.00256638	0.00373901	0.00248073	0.00403464	0.00153734	0.00507631	0.00289585	0.00500918	0.00244004	0.00339555	0.00151921	0.00326467	0.0039681	0.00509621	0.00370777	0.00447054	0.00318542	0.00259894	0.00415979	0.00170042	0.0047551	0.00528573	0.00167478	0.000781327	0.000451712	0.00521575	0.000903748	0.00441366	0.00380791	0.0041018	0.00285797	0.00525505	0.00301994	0.00335705	0.00464709	0.00472149	0.00319044	0.00288985	0.00395759	0.00292013	0.00250885
TCAGGT	0.00192767	0.00149555	0.000876125	0.00204161	0.000310746	0.000308367	0.000993657	0.00269046	0.00119009	0.00155114	0.0013325	0.00120767	0.000491413	0.000664756	0.00201225	0.00213346	0.00222295	0.00117964	0.00106859	0.000972518	0.00247928	0.000328442	0.00231407	0.00102626	0.00157955	0.000545754	0.00291802	0.000804625	0.00217203	0.000339748	0.00120454	0.000447496	0.000115813	0.000383173	0.00024178	0.0012959	0.00102299	0.00223176	0.0027382	0.00230176	0.00221134	0.00246566	0.00153749	0.000432639	0.00174949	0.00146193	0.00142311	0.000642583	0.000227442
TTCAGG	0.00232956	0.00254571	0.00158328	0.00340597	0.0014106	0.00234109	0.00163584	0.00419174	0.00192255	0.00301594	0.00200752	0.00286652	0.000745495	0.00305701	0.00307035	0.00303858	0.00245987	0.00465862	0.00115949	0.0018486	0.00388756	0.00394491	0.00324736	0.00334655	0.00177345	0.00148171	0.00340048	0.00142804	0.00296681	0.00236631	0.00153015	0.000635299	0.000449448	0.00206873	0.000691194	0.00298515	0.0027554	0.00378117	0.00407609	0.00360407	0.0032777	0.00388508	0.00138279	0.0014715	0.00269864	0.00241455	0.00253723	0.00182146	0.000742603
ATTCTT	0.00267116	0.00213059	0.00262664	0.0023794	0.00200695	0.000194605	0.00166747	0.00336149	0.00296444	0.00260139	0.00265642	0.00155208	0.00107207	0.000812924	0.00262255	0.00237031	0.0031021	0.00139517	0.00309018	0.00151321	0.00358329	0.000324443	0.00397832	0.00117704	0.00265849	0.00100594	0.00663224	0.001886	0.00223011	0.000385436	0.00243286	0.000621695	0.00311779	0.000173929	0.00192005	0.00208852	0.00183049	0.00251264	0.00296943	0.00241662	0.00294879	0.00342036	0.00215296	0.000556686	0.00197981	0.00187201	0.00233476	0.0018085	0.00226596
TATTCT	0.00335079	0.0021429	0.00261881	0.00261042	0.00261797	0.000655399	0.001871	0.00333667	0.00338763	0.00288054	0.00275432	0.00183107	0.00106335	0.000934037	0.00295548	0.00247043	0.00408338	0.00138145	0.0031185	0.00132076	0.00355822	0.000509022	0.00389765	0.00141558	0.00235393	0.000777586	0.00605256	0.00228435	0.00227204	0.000463327	0.00276217	0.000488635	0.00434307	0.000618021	0.00141839	0.0018757	0.00183442	0.00247345	0.00323966	0.00260291	0.00294861	0.00328319	0.00182932	0.000575258	0.00194898	0.00188173	0.00273316	0.00138259	0.00317233
TTATTC	0.0042842	0.00536223	0.00420763	0.00590949	0.00584958	0.00635987	0.00385993	0.00700216	0.00595447	0.00707014	0.00505765	0.0074863	0.00254155	0.00580344	0.00577493	0.00659277	0.00506378	0.00820755	0.00450103	0.00489159	0.00710087	0.00650814	0.00728564	0.00686597	0.00419959	0.00371836	0.00859976	0.00474429	0.00606756	0.00634172	0.00412609	0.00132244	0.00699961	0.00770337	0.00368131	0.00657354	0.00701533	0.00628617	0.00597813	0.00546433	0.00545403	0.00718694	0.00497044	0.00522849	0.00444893	0.004071	0.00581229	0.00506952	0.00567572
CTTATT	0.00395658	0.00407209	0.0034519	0.0044553	0.0050446	0.00530776	0.00313161	0.00522182	0.00520127	0.00557969	0.00451312	0.00546285	0.00200365	0.004711	0.00473376	0.00499501	0.00485635	0.00557222	0.00424068	0.00398139	0.00580217	0.00544954	0.00607102	0.00538543	0.00346547	0.00283277	0.00799732	0.00413849	0.00449272	0.00516434	0.00368243	0.00085692	0.00667244	0.00618395	0.00295757	0.00460077	0.00477598	0.00495861	0.0046899	0.00484806	0.00467981	0.0056582	0.0040481	0.00404947	0.00347535	0.00320793	0.00479555	0.00372131	0.00536954
GCTTAT	0.00353411	0.00264363	0.00291576	0.00328435	0.00323517	0.000247372	0.00223654	0.00357115	0.00399234	0.00317045	0.00318874	0.00201897	0.00128763	0.000842532	0.00377495	0.00269532	0.00429471	0.0031662	0.0032685	0.00201417	0.00440257	0.00078293	0.00471283	0.00161112	0.00264522	0.000981413	0.00613747	0.00244202	0.00347513	0.00062035	0.00286652	0.000559655	0.00462145	0.000740179	0.00175008	0.001116	0.00272889	0.00357691	0.00448212	0.00282622	0.00357401	0.00468278	0.00221606	0.000374218	0.00215085	0.00256483	0.00330653	0.00229098	0.00335851
TGCTTA	0.00359119	0.00264247	0.00294022	0.00326674	0.00322949	0.000241324	0.0022155	0.00355508	0.00403728	0.00317744	0.00321017	0.00203004	0.00128763	0.000831012	0.0038016	0.00266119	0.00429096	0.00317074	0.0033666	0.00199619	0.00442459	0.000782948	0.00472399	0.00156163	0.00268664	0.000931766	0.00613716	0.00204231	0.00347513	0.000599198	0.0028832	0.000553942	0.00471503	0.000740179	0.00176017	0.001116	0.0027449	0.00358134	0.00450589	0.00273961	0.00357401	0.00464223	0.00220876	0.000385025	0.00216018	0.00230863	0.00337677	0.00225807	0.00343176
GTGCTT	0.0055337	0.00375181	0.00586253	0.00339662	0.00534275	0.000929699	0.00354946	0.00423322	0.00588908	0.00373744	0.00478783	0.00235925	0.00288105	0.00188417	0.0054993	0.00275442	0.0070888	0.00283352	0.00459014	0.00213203	0.00539861	0.000630487	0.00578245	0.00191568	0.00568546	0.00221832	0.007099	0.00414246	0.00580557	0.00123251	0.00393763	0.00303471	0.0048797	0.000724734	0.00181147	0.00114553	0.00433353	0.00367508	0.00407626	0.00396046	0.00565572	0.0048395	0.00425007	0.00122609	0.00252534	0.00334751	0.00595133	0.00424625	0.00573788
GGTGCT	0.00403526	0.00293746	0.00511477	0.00297715	0.00308461	0.00069	0.00233773	0.00394187	0.0037145	0.003109	0.00320144	0.00227112	0.00197451	0.00171566	0.00438284	0.00230214	0.00595224	0.00243994	0.00347325	0.00199854	0.00390938	0.000569034	0.00338921	0.00114559	0.00319175	0.00157317	0.0053743	0.00339761	0.00263244	0.000592903	0.00316674	0.00298462	0.00297569	0.000703939	0.000832309	0.00111171	0.00149938	0.00354189	0.00383574	0.0039546	0.00352641	0.00408095	0.00161208	0.000438348	0.00234269	0.00277277	0.00286524	0.00203369	0.00227761
CGGTGC	0.00404961	0.00293401	0.00519037	0.00298591	0.00309035	0.00067834	0.00231909	0.0039224	0.0037145	0.00310553	0.00320144	0.00225458	0.00198376	0.00172908	0.0044282	0.00233326	0.00603914	0.00239944	0.00339304	0.00198259	0.00389834	0.00056848	0.00346189	0.00114254	0.00319175	0.00158187	0.00535046	0.00340179	0.00258188	0.000568964	0.00319406	0.00299043	0.0029602	0.000703939	0.000783364	0.00111171	0.00149899	0.00352452	0.00375261	0.00396134	0.00356022	0.00403182	0.00165194	0.000427371	0.0023516	0.00272221	0.00285336	0.00197229	0.00227761
CCGGTG	0.00404162	0.00291843	0.00514182	0.00298591	0.00311953	0.000666465	0.00225842	0.0039077	0.00373649	0.00307738	0.00337524	0.00225464	0.0020695	0.00170876	0.00441891	0.00230214	0.00603914	0.00238102	0.00312033	0.00197297	0.00387615	0.000561371	0.00331318	0.0011353	0.00319814	0.00157303	0.00532689	0.00339223	0.00258188	0.000573818	0.00328798	0.00297876	0.0029602	0.000703939	0.000783795	0.00111171	0.00147415	0.00352881	0.00369197	0.00396049	0.00352633	0.004	0.00159873	0.000416101	0.002356	0.00270953	0.00285336	0.00195968	0.00224001
GCCGGT	0.00435468	0.00452175	0.00534588	0.00440775	0.00415495	0.0061332	0.00285205	0.00591204	0.0040989	0.00518371	0.0037869	0.00675282	0.00277534	0.0059534	0.00515234	0.00514566	0.00621266	0.00490136	0.00315268	0.00374664	0.00493414	0.00547431	0.00385732	0.00515723	0.00341083	0.00369232	0.00595595	0.00467331	0.00355225	0.00524179	0.00368064	0.00369914	0.00302238	0.0067423	0.00131958	0.00522294	0.00291473	0.00484594	0.00375086	0.00608901	0.00410073	0.00463771	0.00290117	0.0050013	0.00409147	0.00370205	0.00373218	0.00282453	0.00272417
AGCCGG	0.00528011	0.00522682	0.0076025	0.00487977	0.00530853	0.00771807	0.00529473	0.00706381	0.00508933	0.00631371	0.00434808	0.00707083	0.00603894	0.00736024	0.0056424	0.00640081	0.00683805	0.0054763	0.00354199	0.00461391	0.00536517	0.00613182	0.00445627	0.00562998	0.00414074	0.00438416	0.00603182	0.00513851	0.00446529	0.00628711	0.00616566	0.00380748	0.00503504	0.00722484	0.00217864	0.00688563	0.00378266	0.00588285	0.00426739	0.00739485	0.00419993	0.00544996	0.00418656	0.00570808	0.00467483	0.00485153	0.00404907	0.00338319	0.003157
GCCCGA	3.53444e-05	3.83813e-05	5.16342e-05	3.4859e-05	2.83281e-05	6.04792e-06	5.80685e-05	0	5.60662e-05	4.30185e-06	6.31256e-05	0	4.17752e-05	1.75819e-05	0	0	0	4.46676e-06	3.16776e-05	1.67848e-05	1.08148e-05	7.50313e-06	3.16955e-05	3.34012e-06	4.17063e-05	8.60821e-06	2.25063e-05	4.16507e-06	0	4.65252e-05	2.69163e-05	5.19828e-05	1.51052e-05	0	1.33552e-05	3.47246e-05	4.99451e-06	2.6329e-05	3.50464e-05	1.40916e-05	0	3.32715e-05	0	1.03817e-05	1.77142e-05	5.45545e-05	0	5.94613e-06	0
TGCCCG	0.0003716	0	0	1.73397e-05	1.65346e-05	5.89124e-06	3.76662e-05	0	1.0946e-05	0	4.1459e-05	5.79047e-06	2.43013e-05	3.26014e-06	0	0	0	1.46019e-05	1.56362e-05	1.67848e-05	1.08148e-05	7.0924e-06	6.28717e-06	3.34012e-06	2.46016e-05	8.60821e-06	1.45624e-05	0	0	3.24866e-05	0	2.29417e-05	4.56286e-05	4.6872e-06	2.33178e-05	0	0	1.28145e-05	3.50464e-05	6.60426e-06	8.22112e-06	5.47429e-06	0	0	8.81158e-06	2.48811e-05	0	5.93011e-06	0
TTGCCC	0.00179159	0.00138172	0.000937971	0.00100982	0.00213229	0.000864443	0.00109408	0.00119051	0.00184259	0.00120663	0.00111999	0.000679696	0.00105929	0.00111866	0.00192311	0.000571645	0.00266993	0.00179321	0.00156809	0.00110346	0.00147088	0.00214652	0.00133352	0.00172095	0.00237698	0.00130483	0.00183504	0.00156161	0.00227492	0.00207263	0.000480024	0.0013411	0.00109957	0.000625399	0.000594661	0.000736573	0.00261157	0.00142908	0.000524413	0.00224676	0.0014606	0.00110215	0.0025328	0.00151146	0.000710904	0.00077121	0.002383	0.00236042	0.00190545
GGCATG	0.00330706	0.00278889	0.00223921	0.00273725	0.00240822	0.000577879	0.00175614	0.00394148	0.00322832	0.00324594	0.00300321	0.00184491	0.00171928	0.00156549	0.00391973	0.00240129	0.00538177	0.0023918	0.00308531	0.00206681	0.00366002	0.000463999	0.00357664	0.00118418	0.00276434	0.00140053	0.0058494	0.00323379	0.00240023	0.00050128	0.00236879	0.00300627	0.00276636	0.000387714	0.00115241	0.00125885	0.00165789	0.00345718	0.00338261	0.00390574	0.00393368	0.00371038	0.0016284	0.000404322	0.00224687	0.00253647	0.00262885	0.00221027	0.0020063
CGGCAT	0.00405803	0.00296532	0.00267152	0.00299092	0.00336471	0.000607305	0.00214735	0.00398736	0.00401256	0.00346839	0.00323484	0.00186156	0.00192446	0.00161866	0.00450133	0.00240129	0.00653609	0.00239175	0.00392075	0.00208513	0.00391521	0.000467983	0.00401682	0.00121144	0.00289776	0.00143962	0.00614909	0.00355431	0.00267174	0.00050128	0.00293275	0.00300624	0.00438486	0.000383002	0.00130813	0.00125885	0.00179399	0.00348755	0.00377338	0.00389911	0.00407369	0.00395412	0.00189622	0.000425702	0.00230474	0.0025529	0.00309712	0.00226374	0.00305135
GCGGCA	0.00407921	0.0029652	0.00272046	0.0029645	0.00330015	0.00061918	0.00212821	0.00399725	0.00399003	0.00348775	0.00323484	0.00190257	0.0017619	0.00161586	0.00450133	0.00240129	0.00653609	0.0024102	0.00408661	0.00209498	0.0039387	0.000468021	0.00400534	0.00121478	0.00290619	0.00143962	0.00614925	0.00353767	0.00267174	0.000496601	0.00295073	0.00299463	0.00438486	0.000392232	0.00131155	0.00125885	0.00180351	0.00351916	0.00377338	0.00391947	0.00406539	0.00399165	0.00187534	0.000436912	0.00231362	0.00256255	0.00309712	0.00227275	0.00305135
GGGCCT	6.99781e-05	1.88568e-05	2.42119e-05	2.64695e-05	1.14641e-05	2.47764e-05	0.000130184	0.000108142	6.76126e-05	3.27402e-05	6.18426e-05	2.80764e-05	0.000460626	2.06332e-05	4.7807e-05	0	2.96331e-05	2.72368e-05	3.2e-05	8.52195e-06	7.98619e-05	1.08923e-05	7.89613e-05	4.10694e-05	0.000107514	6.1509e-05	8.245e-05	4.63445e-05	8.98781e-05	1.43071e-05	4.61987e-05	4.03823e-05	0.000136121	3.82061e-05	1.67941e-05	0	2.49728e-05	7.43027e-05	2.30003e-05	3.33367e-05	1.86538e-05	4.5002e-05	7.2203e-05	1.09196e-05	2.67879e-05	3.00235e-05	3.49091e-05	7.2587e-05	0.00018211
AGGGCC	0.000339422	0.00158394	0.000223193	0.00145711	0.00116627	0.00536464	0.000705362	0.00200376	0.000430388	0.00217393	0.000625874	0.00446334	0.000792395	0.00424227	0.00071689	0.00284435	8.81317e-05	0.00249764	3.25093e-05	0.00180055	0.00112644	0.00467383	0.00061671	0.00402558	0.000395098	0.00210174	0.000680883	0.00140972	0.00129152	0.00579014	0.00058615	0.000744473	0.000230911	0.00576466	0.000532484	0.00414699	0.00143753	0.00130331	7.15491e-05	0.00209498	0.000535931	0.000604003	0.00126371	0.00447391	0.00170866	0.000976117	0.000934153	0.0010649	0.000703464
GAAGGG	0.000157023	0.000314442	0	7.95248e-05	8.98764e-05	0.000329023	0.000247384	0.000197425	6.67106e-05	0.000439224	0.000106095	0.000363372	0.000279798	0.000433169	8.1365e-05	0.000191855	2.96331e-05	0.000182361	8.02936e-05	0.000137227	5.51363e-05	0.000250576	0.000129459	0.000159929	7.77378e-06	0.000150714	6.69282e-05	0.000117641	0.000503531	0.000679341	7.12733e-05	0.000157859	1.53412e-05	0.000470244	0.000223507	0.00100726	0.00017539	7.4458e-05	5.88356e-05	0.000232607	8.52886e-06	8.42772e-05	0.000180966	0.000292253	0.000186077	0.000253705	7.00632e-05	0.000141588	0.00010929
CCAACC	5.67431e-05	1.88918e-05	2.29064e-05	5.94763e-05	7.38452e-05	2.43448e-05	7.69006e-05	5.43593e-05	0.000131841	0.000114192	0.000252134	1.64316e-05	6.7403e-05	2.3054e-05	3.65136e-05	0	5.74348e-05	4.47828e-05	6.37553e-05	0	2.29912e-05	2.19314e-05	5.79518e-05	3.09157e-05	4.38186e-05	2.19783e-05	5.37188e-05	0.000879383	0	4.25411e-05	8.14341e-05	4.5779e-05	3.01427e-05	9.32557e-06	1.70026e-05	0	7.56162e-05	4.70506e-05	5.70341e-05	3.96373e-05	6.68134e-05	0.000109993	1.3053e-05	1.121e-05	7.44585e-05	3.34602e-05	5.85403e-05	6.3207e-05	0.000107771
ACCAAC	0.000338279	0.000247281	7.45398e-05	0.000517306	0.000520513	0.000226812	0.000142039	0.00019207	0.000439878	0.000322356	0.000891563	6.16436e-05	0.000262567	0.000130693	0.00016897	0.00010496	8.63003e-05	0.00020264	0.000301206	8.65718e-05	0.000349545	7.07887e-05	0.00113426	0.000316972	0.000925622	0.000334801	0.000560634	0.00116517	0.000963836	0.000101897	0.00029353	4.91118e-05	0.000118154	2.49104e-05	0.000585513	0.000152118	0.0007699	0.000121906	4.75632e-05	3.29647e-05	0.00169319	0.000514563	0.000303552	0.000329953	0.000134501	0.000257532	0.0006798	0.000672806	0.000724377
AACCAA	0.000186198	0.000141317	0.000148779	0.000554096	8.58252e-05	0.0001701	0.000212614	0.000134753	0.00013137	0.000116675	0.000297022	6.16206e-05	0.000155722	0.000107477	0.000175239	0.000128739	0.000176651	6.80482e-05	0.000144551	0.000100727	0.000255342	4.093e-05	9.71356e-05	2.73218e-05	9.17856e-05	8.19797e-05	9.15251e-05	8.48163e-05	9.05822e-05	5.76269e-05	0.000126716	5.76196e-05	0.000190905	4.73323e-05	6.28677e-05	7.17941e-05	0.000109329	0.000125246	9.48413e-05	0.000201668	9.11333e-05	0.000125186	7.38417e-05	6.88734e-05	9.01677e-05	0.000212506	0.000175423	5.92385e-05	0.000113747
TAACCA	0.000126719	0.00085392	0.000894171	0.000847856	0.000651016	0.000401797	0.000521678	0.0008033	0.000540473	0.000535846	0.000208623	0.000660171	0.000384901	0.000595228	0.000523921	0.000435194	0.000403967	0.000412729	0.00192381	0.000844573	0.000643403	0.000172213	0.000389146	0.000318299	0.000346106	0.000782215	0.00014964	0.000394856	0.000135166	0.000139832	0.000507863	0.00046934	0.00111548	0.000259531	0.00158708	0.00191762	0.000734403	0.000502222	0.00109122	0.000293302	0.00040383	0.000788513	0.000557555	0.000512622	0.00107606	0.000751847	0.000269758	0.000645781	0.000434798
TTTAAC	8.33538e-05	0.000342453	4.73718e-05	0.000102788	6.10561e-05	3.80272e-05	0.00017303	0.000268051	9.74452e-05	0.000190458	6.11039e-05	0.000160806	0.000238365	0.000165356	0.000121513	9.22835e-05	0	5.79664e-05	0.000176133	0.000144713	5.4859e-05	3.57592e-05	0.000115625	0.000110908	7.49653e-05	0.000284574	5.38303e-05	0.000191131	0	8.20755e-05	6.25923e-05	8.65404e-05	6.02728e-05	9.72458e-05	4.77181e-05	0	0.000101848	8.56065e-05	6.96955e-05	8.57684e-05	5.75005e-05	7.09576e-05	4.08374e-05	3.31623e-05	0.000136823	0.000269149	0.000108906	0.000180268	0
CTTTAA	6.90997e-05	3.71657e-05	2.29064e-05	8.56198e-05	1.64513e-05	0	0	4.3042e-05	8.65551e-05	5.23931e-05	4.05315e-05	2.19523e-05	3.2752e-05	3.58368e-05	1.72947e-05	0.000122592	0	1.74625e-05	1.58768e-05	1.6743e-05	2.17416e-05	1.43379e-05	8.21516e-05	2.75614e-05	1.59462e-05	3.51035e-05	3.88155e-05	3.28762e-05	0	4.20122e-05	5.35101e-05	1.14013e-05	6.02728e-05	0	1.3183e-05	0	4.84564e-05	5.08133e-05	3.4104e-05	4.57322e-05	5.75005e-05	7.01394e-05	1.3053e-05	0	6.05142e-05	0.000200854	4.57261e-05	1.8012e-05	0
TTCCTT	0.000570722	0.000395738	0.000224344	0.000294433	0.000390425	5.59349e-05	0.000393449	0.000337649	0.000807385	0.000269957	0.000542704	0.00020427	0.00014702	0.000122607	0.000332121	0.000348674	0.00027511	0.000340591	0.000316884	0.000149312	0.000380978	3.61717e-05	0.00112943	0.000461275	0.000554263	7.75977e-05	0.00115545	0.000224332	0.000736885	0.000265192	0.000392617	0.000104996	0.00032609	6.67703e-05	0.000513306	7.23309e-05	0.000569581	0.000291858	0.000166113	0.000288986	0.000284216	0.000403887	0.00122594	0.000169364	0.00028941	0.000302225	0.000507967	0.000842375	0.000108922
GTTCCT	0.000139926	8.18091e-05	4.68699e-05	9.59505e-05	3.93385e-05	5.99775e-05	9.35991e-05	0.000153261	2.14786e-05	0.000127537	6.19701e-05	0.000117825	1.64037e-05	6.31777e-05	0.00010844	0.000124295	8.65979e-05	6.78523e-05	0.00012953	0.000111377	4.42787e-05	2.55271e-05	0.000146274	7.25562e-05	1.5782e-05	3.528e-05	0.000780085	7.0779e-05	0	6.59149e-05	7.11433e-05	4.05105e-05	0.000123012	0.000237825	4.37217e-05	3.43572e-05	4.36212e-05	0.000111152	8.22975e-05	0.000106318	8.92342e-05	0.000109749	2.6518e-05	7.74262e-05	0.000132465	7.88846e-05	9.28784e-05	2.05715e-05	3.60464e-05
AGTTCC	8.32325e-05	8.56779e-05	2.29064e-05	3.41167e-05	2.88841e-05	1.32984e-05	3.68014e-05	4.35385e-05	2.2063e-05	7.86834e-05	6.08981e-05	6.838e-05	8.03187e-06	2.29057e-05	9.12531e-05	0.000236294	8.65979e-05	3.65765e-05	0.00012953	2.65318e-05	2.20189e-05	7.24253e-06	0.000117025	9.80803e-05	1.5782e-05	2.22109e-05	1.47859e-05	2.05323e-05	5.08518e-05	4.7854e-05	2.69321e-05	2.28567e-05	0.000123012	9.52426e-06	1.00044e-05	0	2.40046e-05	0.000111015	3.39221e-05	7.3029e-05	4.81039e-05	8.53347e-05	6.41026e-06	2.30769e-05	9.5911e-05	9.06082e-05	8.09348e-05	2.87441e-05	0
AACAAA	0.000527017	0.000317199	0.00133228	0.000194922	0.000954814	7.71002e-05	0.000395043	0.000274802	0.00121012	0.000460756	0.000993123	0.000206771	0.000562267	0.000286558	0.00034033	0.00018503	0.00037586	0.00020965	0.000774734	0.000216306	0.00088344	0.000152477	0.000609889	9.56097e-05	0.00117825	0.000164851	0.00180528	0.000292093	0.000867818	0.000149874	0.000916155	0.000133527	0.000337123	0.000195849	0.000495281	0.000180644	0.000568364	0.000335022	0.000169871	0.000275477	0.00016809	0.000276246	0.000744202	0.000111914	0.000220878	0.000262157	0.000619289	0.000330021	0.000815171
GAACAA	0.000196387	0.00031131	0.000532915	0.000157167	0.000409	0.000309955	0.000316766	0.00033644	0.000188771	0.000246959	6.24854e-05	0.000300879	0.000415152	0.000387606	0.000200232	0.000401736	5.75821e-05	0.000313576	0.000176542	0.000350223	0.00029105	0.000197744	0.00028123	0.000157317	0.000142847	0.000195475	0.000219345	0.000162592	0.000179759	0.000105214	0.000196404	8.12161e-05	0.000258999	0.000183415	0.000363725	0.000706202	6.81815e-05	0.000466742	0.000654524	0.000426986	0.000229715	0.000347892	0.000296422	0.000276838	0.000448297	0.000357131	0.000221592	0.000233206	0.000108145
TGAACA	0.000104519	7.1203e-05	2.44654e-05	9.465e-05	1.14635e-05	0	5.53432e-05	0.000190212	3.2481e-05	8.71035e-05	4.13802e-05	7.70352e-05	0	3.59178e-05	7.18323e-05	0.000153419	2.87167e-05	5.33116e-05	3.23359e-05	5.94416e-05	0.000121213	1.43687e-05	0.000133417	4.11958e-05	3.21268e-05	1.7283e-05	0.000135266	4.96967e-05	8.96483e-05	3.73896e-05	4.44976e-05	4.60957e-05	0	0	0	6.69434e-05	2.41022e-05	0.000202302	8.50512e-05	0.000206717	8.12032e-05	0.000159043	3.27101e-05	4.37399e-05	0.00015803	0.000129516	0.00010451	2.63456e-05	3.56786e-05
CTGAAC	0.000584955	0.00231744	0.000993984	0.00226311	0.00175462	0.00548534	0.0010134	0.00290541	0.00129189	0.00315036	0.00103863	0.00483784	0.000893091	0.00437621	0.00159602	0.00350927	0.000502535	0.00464283	0.000411188	0.00256959	0.0022164	0.00535556	0.00158218	0.00458634	0.000896357	0.0024723	0.00155609	0.00170354	0.00235562	0.00559646	0.000870266	0.000802962	0.000359953	0.00625461	0.00114163	0.00431701	0.00282575	0.00268234	0.00137538	0.00262532	0.00132816	0.00219074	0.0016811	0.0045957	0.00221056	0.00161056	0.00159398	0.00190253	0.000854608
CCTTCC	0.00128672	0.0012152	0.000295175	0.000613076	0.000963208	0.00053363	0.00048931	0.00135571	0.00123475	0.00122365	0.000859292	0.0007084	0.000738415	0.00105207	0.00160021	0.000500546	0.0025142	0.00136983	0.000930176	0.00098086	0.000611196	0.00029837	0.000423229	0.000290385	0.00128674	0.00103328	0.000361846	0.00204214	0.000844723	0.000398442	0.000503728	0.00251235	0.000197883	0.00032523	0.000172544	0.000206199	0.000780426	0.00139101	0.000521486	0.00172462	0.00138976	0.00120675	0.000903083	0.000199831	0.000714694	0.00105369	0.000652945	0.00168175	3.56786e-05
TTTCCT	9.83465e-05	8.85698e-05	0.000121817	0.000200759	1.73778e-05	4.04119e-05	0.000152197	0.000150765	9.95451e-05	0.000100044	8.35907e-05	4.9896e-05	2.53576e-05	0.000152123	5.62628e-05	0.000285584	2.87167e-05	5.95373e-05	6.46728e-05	6.03828e-05	0.00082912	3.41143e-05	0.000275273	0.000280832	4.17542e-05	0.000121488	0.00017453	0.000139958	0.000347839	0.000116	0.000138534	6.9953e-05	3.01427e-05	6.30146e-05	1.76795e-05	0	0.000288276	0.00015913	0.000130333	0.000159794	9.17167e-05	0.000230631	0.000250516	0.000129256	0.000210193	0.000274463	0.000526089	9.06191e-05	0.000241117
TTTTCC	0.000176486	0.000133609	0.000128317	0.000122008	2.75605e-05	2.33837e-05	3.63355e-05	0.000136287	6.64208e-05	0.000114018	6.2269e-05	8.33213e-05	5.78565e-05	4.95344e-05	5.33985e-05	0.000215339	8.61561e-05	6.31349e-05	0.000112296	0.000146286	0.000176633	4.62725e-05	0.000179394	8.09876e-05	4.99266e-05	6.94524e-05	5.94896e-05	7.96969e-05	0.000140799	0.000178654	8.99336e-05	5.74034e-05	9.24088e-05	1.8731e-05	3.74945e-05	0.000167204	6.02377e-05	0.00018387	9.32933e-05	0.000179575	0.000113708	0.000177152	7.84784e-05	0.000175216	0.000188584	0.000317879	0.000190511	5.96484e-05	7.1725e-05
CCCGTC	0.000140125	8.56897e-05	0	1.73401e-05	5.0524e-05	3.06517e-05	0.000111065	6.89221e-05	0.00016586	4.18731e-05	6.23766e-05	4.97483e-05	3.22517e-05	1.70152e-05	8.0574e-05	3.003e-05	5.74333e-05	1.79869e-05	6.43333e-05	3.42654e-05	4.36502e-05	4.65488e-05	0.000220471	9.05038e-05	0.000149561	2.59646e-05	0.000166956	5.49668e-05	4.48229e-05	4.21098e-05	0.000180793	1.16992e-05	0	1.8703e-05	3.34413e-05	6.69434e-05	0.000161335	3.87656e-05	2.33445e-05	3.31656e-05	0.00013164	4.44957e-05	0.000333446	2.19583e-05	5.75888e-05	8.60864e-06	2.35793e-05	0.000179656	7.1725e-05
CCCCGT	0.000465563	0.000267885	0.000177977	6.11072e-05	0.000208219	0.000118648	0.000308499	0.000323753	0.00016786	0.00012485	0.000418184	0.000134644	0.000122913	0.000328464	0.000198897	0.000407824	0.00037424	7.63873e-05	0.000275011	0.000213507	0.000132353	0.000360353	0.000307751	0.000302016	0.000252235	7.48898e-05	0.000342001	0.000342926	0.000140498	0.000146438	0.00022894	0.000353671	0.000248395	0.000253279	0.000305161	7.17504e-05	0.000404548	0.000130204	0.000273619	0.000302387	0.000216121	6.63181e-05	0.000644112	0.000132938	0.000116862	7.75306e-05	7.26744e-05	0.000262723	7.19118e-05
CTTAAC	0.000298167	0.000110769	0.000590096	0.000156294	0.00028109	4.1644e-05	5.62174e-05	4.95997e-05	0.000336614	9.57822e-05	0.000986474	4.92263e-05	0.000283823	4.62913e-05	0.000367027	0.000153557	2.87167e-05	1.33778e-05	0.000112458	6.74396e-05	0.000493384	2.85523e-05	0.000168569	9.57831e-05	0.000496408	3.0827e-05	0.00030681	0.000125207	0.000412414	3.27763e-05	0.000596292	4.60006e-05	4.66721e-05	4.14163e-05	0.00100533	0	0.000176162	9.89747e-05	7.29288e-05	2.639e-05	0.000196605	0.000116452	0.00029101	1.08076e-05	8.85033e-05	8.04534e-05	0.000285733	0.000114535	0.000515139
ACTTAA	0.000189597	5.6621e-05	0	0.000104051	3.88636e-05	0	8.18982e-05	4.41451e-05	6.53754e-05	4.51075e-05	0.000104478	3.82667e-05	5.71788e-05	2.60569e-05	0.000107513	0.000154031	2.87167e-05	8.95666e-06	0.000112458	1.70457e-05	0.000187207	7.14681e-06	3.83964e-05	4.05507e-05	5.70259e-05	2.16762e-05	2.23467e-05	3.72926e-05	9.08317e-05	1.87657e-05	0.000292993	0	0	9.18235e-06	0.000428671	0	2.47463e-05	7.30826e-05	0	1.98528e-05	0.000172064	9.9622e-05	6.94725e-05	0	5.27069e-05	0.000155183	2.32715e-05	1.47146e-05	3.56786e-05
TACTTA	0.00019013	0.00015497	5.25061e-05	0.000212302	7.31623e-05	8.45749e-05	1.85419e-05	0.000145051	6.53754e-05	0.000294076	0.000104478	0.000284135	5.71788e-05	0.000114155	0.000107513	0.00019021	5.75821e-05	0.000133097	0.000112458	0.000121293	0.000187207	6.6035e-05	3.93257e-05	0.000207772	6.0145e-05	0.000128722	2.99524e-05	0.000315045	9.08317e-05	4.75068e-05	0.000293457	5.74267e-06	0	7.59945e-05	0.000431937	0.000310496	2.42566e-05	0.000193037	0	0.000218636	0.000139831	0.00022555	5.94113e-05	5.611e-05	0.000185795	0.00014245	2.32715e-05	7.20305e-05	3.56786e-05
TTACTT	3.51043e-05	2.8841e-05	2.73269e-05	5.18439e-05	8.65832e-05	2.43181e-05	0	1.45287e-05	1.03615e-05	3.06943e-05	6.47359e-05	0	3.58321e-05	2.36087e-05	4.45635e-05	3.51228e-05	8.62987e-05	3.18223e-05	1.62093e-05	4.34045e-05	4.69921e-05	1.08518e-05	0.000106271	2.44618e-05	3.3575e-05	5.41769e-05	2.29191e-05	2.482e-05	0	0.000112496	5.35552e-05	4.58883e-05	0	1.40886e-05	7.08476e-05	3.41763e-05	7.382e-05	3.82739e-05	2.37683e-05	2.64858e-05	0.000198763	5.31705e-05	2.06277e-05	1.24703e-05	2.23844e-05	1.70396e-05	0	2.04806e-05	0
GTTACT	0.000134269	0.000783155	0.000774907	0.000297741	0.000634684	0.000347586	0.000503419	0.000793671	0.000430168	0.000482825	0.000104586	0.000654812	0.000352234	0.000454364	0.00053429	0.000435194	0.000432535	0.000381297	0.00194001	0.000836013	0.000521352	0.000168637	0.000326802	0.00025771	0.000331432	0.000777622	7.48026e-05	0.000345406	0.000135166	8.97085e-05	0.000294871	0.000446364	0.00108335	0.000245852	0.00113865	0.00188344	0.00073543	0.000459558	0.00108082	0.000287141	0.000355278	0.000735135	0.000498036	0.000447765	0.00103268	0.000579892	0.000199076	0.000632166	0.000434798
GGTTAC	4.42839e-05	3.24661e-05	8.18236e-05	5.59931e-05	2.93921e-05	0.000125305	6.31088e-05	7.68846e-05	3.32515e-05	3.41347e-05	2.01649e-05	1.80514e-05	0.000107742	6.15758e-05	2.86062e-05	3.55385e-05	5.86684e-05	9.5114e-06	0	3.77385e-05	2.35212e-05	1.98803e-05	2.66441e-05	1.83573e-05	2.64642e-05	5.58844e-05	3.10185e-05	4.72858e-06	0	5.0084e-05	2.90915e-05	5.57125e-06	0.000101638	9.83384e-06	4.24511e-05	0.000143769	1.54669e-05	7.5536e-05	5.01572e-05	9.5192e-05	7.85663e-06	4.31775e-05	2.08616e-05	6.10316e-05	2.44803e-05	5.61296e-05	2.33921e-05	3.63462e-05	4.08948e-05
GAGGGG	4.90892e-05	8.86282e-05	7.81522e-05	0	1.67392e-05	0	7.9078e-05	3.08685e-05	1.03615e-05	2.61403e-05	2.01649e-05	3.31077e-05	0.000130633	1.73953e-05	2.63858e-05	6.08301e-05	0	2.25923e-05	1.59586e-05	1.8905e-05	4.57203e-05	8.01461e-06	1.93305e-05	2.16302e-05	2.42587e-05	1.77177e-05	2.24243e-05	5.52856e-05	0.000229837	4.83598e-05	6.22719e-05	5.80218e-06	3.43502e-05	1.42632e-05	1.39859e-05	0	9.45826e-05	8.92988e-05	2.36458e-05	1.39555e-05	4.17975e-05	2.86719e-05	3.32938e-05	0	6.34108e-05	1.40429e-05	1.16358e-05	6.31531e-05	0.000340098
CGAGGG	7.00689e-05	6.79078e-05	2.45942e-05	1.70839e-05	3.4948e-05	2.38862e-05	3.7375e-05	8.93053e-05	6.5726e-05	2.22485e-05	4.13802e-05	2.79326e-05	0.00011402	3.32621e-05	8.42442e-05	6.08301e-05	2.87167e-05	1.33785e-05	3.20826e-05	1.72706e-05	0.000101609	2.55296e-05	5.21834e-05	2.74685e-05	4.23566e-05	3.11791e-05	8.26395e-05	4.58407e-05	9.10764e-05	1.94926e-05	5.31906e-05	1.16044e-05	4.81955e-05	0	3.45736e-06	0	5.01603e-05	8.31537e-05	3.59622e-05	6.53721e-06	3.19104e-05	6.72382e-05	7.35386e-05	0	3.13984e-05	1.75715e-05	3.53357e-05	4.55081e-05	0.000338827
ACGAGG	0.000171252	0.000324799	9.83781e-05	1.70839e-05	0.000482785	5.12242e-05	0.00117743	0.000154549	0.000993257	0.000298012	0.000690878	0.000198508	0.000711838	0.000151546	0.000275253	6.08301e-05	0.000116225	0.000114657	3.20826e-05	3.42224e-05	0.000121818	1.6029e-05	5.93987e-05	5.44409e-05	0.00075645	0.000237475	0.000120075	0.000904599	0.000593678	0.00018878	0.000979259	0.000935864	0.000217284	0.000133201	3.42823e-05	0	0.000417309	0.000112981	9.60055e-05	2.23328e-05	8.26424e-05	0.000129634	0.000102106	0.000134502	8.13744e-05	0.000159192	0.000329153	0.0009042	0.0001829
AGACGA	5.56773e-05	4.06914e-05	5.53006e-05	1.70839e-05	3.18339e-05	6.35201e-06	0	3.18739e-05	2.13075e-05	1.46588e-05	4.13802e-05	2.71944e-05	2.45963e-05	3.27695e-06	2.63858e-05	6.08301e-05	2.87167e-05	1.34466e-05	1.60413e-05	0	2.19629e-05	8.22845e-06	3.20793e-05	0	1.5782e-05	1.43331e-05	7.52649e-06	0.000247543	4.48229e-05	3.21523e-05	2.65993e-05	0	0	0	7.06462e-06	0	4.65708e-05	1.7706e-05	3.59622e-05	0	6.03345e-05	0.000130766	6.13792e-05	0	8.57396e-06	9.22118e-06	1.1696e-05	5.99727e-05	3.56786e-05
CAGACG	5.56773e-05	2.84602e-05	0	1.70839e-05	5.59735e-06	5.89124e-06	0	3.47408e-05	5.53082e-05	0.000112513	4.13802e-05	4.38171e-05	1.64403e-05	0	2.63858e-05	6.08301e-05	2.87167e-05	8.9798e-06	4.8124e-05	0	0.000112542	3.68745e-06	4.48823e-05	0	1.5782e-05	4.37124e-06	7.52649e-06	4.27584e-06	4.48229e-05	4.77743e-06	4.45765e-05	0	0	4.61472e-06	1.00513e-05	0	2.99982e-05	4.30731e-05	3.59622e-05	0	3.19104e-05	2.80321e-05	4.71157e-05	0	1.74766e-05	8.74046e-06	1.1757e-05	3.34471e-05	3.56786e-05
ATATTC	0.00339554	0.00500908	0.00670661	0.00355531	0.00618748	0.00783158	0.0053839	0.00558816	0.00528048	0.00603853	0.00514338	0.00630848	0.00579049	0.00707034	0.00491543	0.00559723	0.00404419	0.00698221	0.00268656	0.00460509	0.00515819	0.00646868	0.00539012	0.00603823	0.00574267	0.00484367	0.00439136	0.00481075	0.00744584	0.00687207	0.00439831	0.00329584	0.00506283	0.00735535	0.00392005	0.00605232	0.00805146	0.00490672	0.00263882	0.00520386	0.00509004	0.00501322	0.00664762	0.00616428	0.00328878	0.00440998	0.00630315	0.00697029	0.0060653
AATATT	0.00337988	0.00496516	0.00670139	0.00351962	0.0060457	0.00780746	0.0051064	0.00550787	0.00511658	0.00597049	0.00505649	0.00629138	0.00577988	0.00701848	0.00485857	0.00559723	0.00404419	0.00695276	0.00270294	0.00460509	0.0050227	0.00646868	0.00539667	0.00601345	0.00569959	0.00477128	0.0043683	0.00480133	0.00716372	0.00684261	0.00441555	0.00328917	0.00499078	0.00731254	0.00390926	0.00605232	0.00799873	0.00489743	0.00263882	0.00519641	0.00509831	0.00500042	0.0066072	0.00615313	0.00326994	0.0044005	0.00630315	0.00658796	0.00599091
CAATAT	0.00343916	0.00497631	0.00672721	0.00350164	0.00616171	0.00784781	0.0051064	0.00550803	0.00516699	0.00601502	0.00523028	0.00628571	0.00600166	0.00706795	0.00484922	0.00559723	0.00404419	0.0069308	0.00270294	0.00461366	0.00507511	0.00647997	0.00549255	0.00604742	0.00572874	0.00479949	0.00436956	0.00484673	0.00737076	0.00686245	0.00469555	0.00328917	0.00511198	0.00741332	0.00392593	0.00601759	0.00805582	0.00491178	0.00263882	0.00519582	0.00513498	0.00500042	0.00675935	0.00615313	0.0032869	0.00439789	0.00630315	0.00654995	0.00599091
CCAATA	0.00228628	0.00337439	0.00184359	0.00267031	0.00482982	0.00580849	0.00252648	0.00312797	0.00392472	0.00401119	0.00347121	0.00541304	0.00212435	0.0046174	0.00309658	0.00417325	0.0018518	0.00521067	0.00236894	0.0029085	0.00380603	0.005508	0.00501786	0.00551499	0.00398788	0.00315968	0.00387902	0.0025951	0.00652166	0.00628667	0.00196626	0.000825227	0.00427443	0.00693526	0.0029605	0.00451786	0.00691383	0.00270252	0.00194289	0.00248005	0.00397674	0.00343661	0.00594808	0.00553034	0.00220044	0.00228024	0.00542935	0.00493572	0.00596976
TCCAAT	0.0010758	0.000970787	0.000439555	0.000247908	0.00211219	0.00034188	0.00117712	0.000393352	0.00199313	0.000769024	0.00224307	0.000590352	0.00104221	0.000266986	0.0010656	0.00084986	0.000331545	0.000616917	0.00117112	0.000276702	0.00145617	0.000185207	0.00325406	0.000966576	0.00301907	0.000678434	0.00222639	0.000820187	0.00402995	0.000741905	0.000559992	7.44338e-05	0.00231114	0.000746764	0.00168362	0.000267616	0.00397057	0.000200758	0.000332904	0.00010265	0.00261546	0.00115928	0.00414768	0.000955726	0.000162927	0.000794222	0.00344638	0.00307111	0.00406041
GCCCCC	0.00138392	0.00125279	0.000817317	0.000966296	0.00209575	0.000799963	0.00106075	0.00115228	0.00169752	0.0012021	0.00101161	0.00066376	0.0010617	0.00102954	0.00176212	0.000509919	0.00226025	0.00165816	0.00152354	0.000907089	0.00145734	0.00207188	0.00135491	0.00161626	0.00226893	0.00112428	0.00179654	0.00143714	0.00247923	0.00203599	0.000501337	0.0012017	0.000821296	0.000584055	0.000672336	0.000702928	0.00257838	0.00136814	0.000465475	0.00211972	0.00126382	0.000992989	0.00258796	0.00146921	0.000656903	0.000709777	0.00244652	0.00231809	0.00206273
CGCCCC	9.57579e-05	0.000105492	7.89542e-05	6.29798e-05	0.000140173	7.5369e-05	0.000189666	9.28303e-05	0.00021817	9.41858e-05	0.000107911	9.10817e-05	0.00029062	0.00013087	0.0001307	0	0	0.000132847	0.00027926	7.0802e-05	0.000192146	0.000200142	0.00012023	0.000109535	9.63148e-05	5.34818e-05	0.000199813	5.47277e-05	5.11509e-05	0.000144971	0.000198911	6.35554e-05	0.000106363	7.08117e-05	6.7117e-05	0.000142082	0.000131648	9.75659e-05	0.000152926	0.00016324	6.90344e-05	0.000132575	0.000133774	9.02614e-05	5.51149e-05	7.40618e-05	5.23489e-05	0.00017401	0.000157272
TCGCCC	0.00106991	0.00140247	0.00328857	0.00101294	0.00187633	0.00188644	0.0017396	0.00151655	0.00165116	0.00144606	0.000623674	0.00166254	0.00108222	0.00261609	0.00157801	0.000892895	0.00163197	0.00345793	0.00176434	0.000802361	0.00161865	0.00298873	0.00137679	0.00228287	0.000837495	0.00134452	0.000428142	0.000886562	0.00129353	0.00221943	0.00131435	0.000283585	0.00221015	0.00160079	0.00113678	0.00243172	0.00228636	0.00157991	0.00158567	0.00088274	0.000887339	0.00191558	0.00105501	0.00160563	0.00118737	0.00134962	0.00182588	0.00186421	0.00140114
TTCGCC	0.00164867	0.00047152	0.00353359	0.000293428	0.00189578	0.000195005	0.00262582	0.000623222	0.00186205	0.000494534	0.000684234	0.000371582	0.00282996	0.000594622	0.00112941	6.19192e-05	0.00189789	0.000422961	0.00178116	0.000251146	0.000752689	0.000169964	0.00066815	0.000313412	0.000708652	0.000819993	0.000335139	0.000540477	0.000321951	0.000413004	0.00277215	0.000176847	0.00269295	0.000339316	0.000857816	0.00111415	0.000783569	0.000271353	0.000708865	0.000137099	0.000267557	0.000706012	0.000707349	0.000687429	0.00036603	0.000628887	0.00136759	0.00100601	0.00151371
GTTCGC	7.30788e-05	2.4412e-05	2.68557e-05	4.36178e-05	6.17386e-05	1.82139e-05	0.000209647	1.93943e-05	0.000149897	5.466e-05	0.000170227	0	0.000345742	4.24021e-05	5.84798e-05	0	0	1.88033e-05	6.81876e-05	0	3.72056e-05	6.73853e-05	4.9348e-05	3.39888e-05	0.000301151	2.24103e-05	5.76178e-05	3.42305e-05	5.11509e-05	7.35307e-05	4.57999e-05	1.72872e-05	0	4.56763e-06	0.000433246	0	0.000115238	2.16007e-05	0	4.61645e-05	3.59751e-05	1.66498e-05	0.000113908	7.93981e-05	8.81158e-06	3.51065e-05	5.23489e-05	8.41838e-05	0.000121039
GGTTCG	0.000561794	0.000649877	0.000582056	0.00044652	0.00100178	9.50177e-05	0.000526198	0.00063336	0.000977903	0.000534006	8.62604e-05	0.000455732	0.000306518	0.000227002	0.00074585	0.000155596	0.00101014	0.000186013	0.0023462	0.000409416	0.000347932	0.000110582	0.00042591	0.00018688	0.000277403	0.000626297	0.00014747	0.000437592	0.000186786	0.000106329	0.000135162	0.000359619	0.00187756	0.00020391	0.000627722	0.00124526	0.000797141	0.000247346	0.000331603	7.95971e-05	0.0002096	0.000710782	0.000346541	0.000395904	0.000837969	0.00045579	0.000579101	0.000570853	0.000629823
TTGCTG	0.00177449	0.000975522	0.00142518	0.000485947	0.00284611	0.000426796	0.00135653	0.000466496	0.00264907	0.000805226	0.00179834	0.000209795	0.000971925	0.000412462	0.00116013	0.000421481	0.00151587	0.000640377	0.00179248	0.000219593	0.0016367	0.000230235	0.00274175	0.000787926	0.00281728	0.000710626	0.00229121	0.00108497	0.00327454	0.000809127	0.00108793	4.42806e-05	0.00255323	0.000124961	0.00134107	0.000304016	0.00314545	0.000216002	0.000494956	4.84657e-05	0.00217853	0.000981182	0.00306963	0.000847169	0.000193854	0.000576206	0.00332217	0.00244078	0.00376982
ATTGCT	0.00152939	0.000902599	0.000988724	0.000432381	0.00233751	0.000313906	0.00127269	0.000374593	0.00219489	0.000684098	0.00168294	0.000110333	0.000971969	0.000251627	0.00113988	0.000421481	0.00125187	0.000467883	0.00132585	0.000170873	0.0015019	0.000192679	0.00245754	0.000755575	0.00262725	0.000662259	0.00192454	0.00101942	0.00335862	0.000744405	0.000843145	4.42806e-05	0.00210204	0.000123669	0.00103112	0.000152118	0.0030025	0.000142371	0.000429719	0	0.00217329	0.00090918	0.00286299	0.000811523	0.000183237	0.000547343	0.00320847	0.00236317	0.00361987
AATTGC	0.00079984	0.000693284	0.000367617	0.000157006	0.00135403	0.000263513	0.000881484	0.000333971	0.00145247	0.000434402	0.00142132	0.000110304	0.000718865	0.000136723	0.000609678	0.000421481	9.7548e-05	0.000443475	0.000522569	0.000123546	0.00122341	8.09194e-05	0.00203493	0.00071062	0.00238045	0.000611845	0.00148682	0.000702467	0.00299794	0.000695725	0.000251176	4.99054e-05	0.000361731	3.98997e-05	0.000899716	0.000152118	0.00278494	0.000107031	8.64142e-05	0	0.00198008	0.000682206	0.00244905	0.000811523	0.000129166	0.000440326	0.00266492	0.00226077	0.00248806
GAATTG	0.00079929	0.000680958	0.000190499	0.000165533	0.00131117	0.000310399	0.000900121	0.000355562	0.00140799	0.000481031	0.001379	0.000111084	0.000718818	0.000225066	0.000619015	0.000576275	9.7548e-05	0.000488026	0.000506527	0.000271759	0.00121196	0.000187176	0.00197078	0.000734083	0.0023713	0.000749043	0.0014415	0.000468014	0.00299794	0.000691255	0.000261326	3.83618e-05	0.000361731	2.60252e-05	0.000886261	0.000152118	0.00275918	0.000158178	2.67475e-05	1.32766e-05	0.00196943	0.000584118	0.00244153	0.000822386	0.00012912	0.000486443	0.00267606	0.00226633	0.00245164
AGAATT	0.000792279	0.000715324	0.000242361	0.000165533	0.00132793	0.000322495	0.000881484	0.000375265	0.00142055	0.000488811	0.00142477	0.000116812	0.000726891	0.000235053	0.000628935	0.000606918	9.7548e-05	0.000469533	0.000506527	0.000260069	0.001223	0.000187195	0.00212829	0.000746412	0.00239783	0.000758691	0.00152581	0.000477394	0.00299794	0.000686625	0.000297047	5.00532e-05	0.000498793	6.40775e-05	0.00088911	0.000186658	0.00276	0.000162631	2.67475e-05	2.69769e-05	0.00198913	0.00058493	0.00262856	0.000822386	0.00012912	0.000486957	0.00267606	0.00227903	0.00245164
CAGAAT	0.00150062	0.000847855	0.000697402	0.000419476	0.00228244	0.000275516	0.00127269	0.000316447	0.00213919	0.000645782	0.00160989	0.000110482	0.000899353	0.00016982	0.00109835	0.000483401	0.00110769	0.000429307	0.00134197	0.000141793	0.00146669	0.000500243	0.00239879	0.000756693	0.00251381	0.000672483	0.0017036	0.000737957	0.00317342	0.000654116	0.000841824	5.00828e-05	0.00198016	5.94101e-05	0.00101381	0.000186658	0.00286081	0.000150185	0.000334644	1.37003e-05	0.00211156	0.000789752	0.00261253	0.000811523	0.000169274	0.000616761	0.00313319	0.00227523	0.0035783
ACAGAA	0.00178261	0.00206107	0.00058494	0.00096666	0.00262759	0.00106791	0.00143288	0.00188092	0.00250052	0.0018943	0.00250777	0.000912912	0.00162049	0.00151081	0.00232121	0.00126716	0.00255026	0.0021355	0.00143046	0.00109652	0.00210511	0.000477584	0.00342041	0.0013959	0.00408262	0.00197561	0.00233273	0.00274805	0.00431121	0.00116425	0.00089379	0.00256583	0.000602757	0.00053974	0.00156585	0.00079348	0.00403465	0.00142354	0.000577059	0.00155789	0.00478785	0.00202484	0.00295307	0.00144338	0.000775832	0.00181276	0.00374858	0.00404197	0.00314072
CACAGA	0.000820651	0.00100604	0.000214586	0.000365934	0.00151188	0.000304762	0.00103184	0.000481171	0.00160985	0.000719902	0.00169602	0.000365175	0.000768143	0.00026145	0.000664218	0.000576279	0.000126413	0.000501053	0.000538527	0.000150381	0.00137904	8.35253e-05	0.00208245	0.000804078	0.00277041	0.000793373	0.00173241	0.00134295	0.00339943	0.000695548	0.000288197	0.000966798	0.000361731	0.000183542	0.000902614	0.000253948	0.00308513	0.000193361	2.67475e-05	1.37003e-05	0.00204742	0.000707329	0.00244691	0.000844169	0.000200227	0.000864556	0.00288846	0.00290391	0.00244908
ACACAG	0.000921943	0.000937779	0.000311812	0.000444723	0.00142079	0.000292509	0.00110659	0.000836414	0.0014992	0.000607297	0.00143931	0.000437038	0.00193791	0.00033366	0.000807228	0.00045244	0.000185366	0.00052842	0.00112942	0.000251197	0.00125589	0.000101371	0.00212701	0.000844872	0.00253159	0.000979989	0.00144145	0.00057155	0.00294768	0.000667477	0.000315863	0.000183267	0.000564507	0.000219917	0.00111342	0.000253054	0.00303828	0.000223466	0.000123702	3.33982e-05	0.00200544	0.000885062	0.00247953	0.00112803	0.000373647	0.000646341	0.00266611	0.00253979	0.00244791
CACACA	0.00169404	0.00110054	0.000819473	0.000585151	0.00240293	0.000292479	0.00140499	0.000466821	0.00217272	0.000745546	0.00165319	0.000220947	0.00228154	0.000215299	0.00113337	0.000483559	0.00128196	0.000519512	0.0013232	0.000319154	0.00149891	0.000109012	0.00252188	0.000817861	0.00253976	0.000719371	0.00168742	0.000829464	0.00317342	0.000685671	0.000896407	8.48064e-05	0.00216775	0.000127743	0.00115382	0.000219408	0.00288744	0.000132464	0.000550564	3.9933e-05	0.00211257	0.000817845	0.00263889	0.000810551	0.000222579	0.000637652	0.00314608	0.00240336	0.00353853
GCACAC	0.00078603	0.00100123	0.000190499	0.000174943	0.00144676	0.000644503	0.000940787	0.000798751	0.00146618	0.000692458	0.00135274	0.000315671	0.000855806	0.000373199	0.000618348	0.000446494	9.7548e-05	0.000687173	0.00050489	0.000235551	0.00165452	0.000341434	0.00212165	0.000952183	0.00240778	0.000761695	0.00162683	0.000630228	0.00327596	0.000777965	0.000270447	5.0267e-05	0.000361731	0.00054274	0.000931386	0.000842917	0.00333112	0.000204567	6.2339e-05	3.37184e-05	0.00206594	0.000608582	0.00256302	0.000956103	0.000216275	0.000543705	0.00289418	0.00247805	0.00252327
TGCACA	0.00186585	0.00137943	0.00513312	0.000748113	0.00270507	0.00208038	0.0035558	0.00158407	0.00276901	0.00179308	0.00305891	0.00049232	0.00420072	0.00171419	0.0013107	0.00145964	0.000847368	0.00102113	0.00087183	0.000947739	0.00232382	0.000788407	0.00238457	0.00112114	0.00331928	0.00143315	0.00168453	0.00191601	0.00352656	0.00116696	0.0029919	0.00127797	0.00253953	0.000967966	0.00172388	0.00155094	0.00325478	0.00126076	0.000639137	0.00146162	0.00208924	0.00161317	0.00311874	0.00155872	0.000762608	0.00174074	0.00357144	0.00286281	0.00348021
GTGCAC	0.000734958	0.000651096	0.000190499	0.000148013	0.00133063	0.000251481	0.000902519	0.000312058	0.00144544	0.000433721	0.00133107	0.000121757	0.000674746	0.000133323	0.000600345	0.000350822	9.7548e-05	0.000443832	0.000488422	0.000115197	0.00118762	7.2691e-05	0.00205611	0.000740436	0.0024083	0.000605073	0.00135718	0.00042957	0.00274427	0.000648866	0.000261268	4.43105e-05	0.000361731	2.60252e-05	0.000882927	0.000221198	0.00273691	9.77171e-05	2.67475e-05	0	0.00199803	0.000557247	0.00242729	0.000799341	0.000133899	0.000426654	0.00262651	0.00221985	0.00241168
CGTGCA	0.00131092	0.00255	0.000791286	0.00168694	0.00321107	0.00611785	0.00214223	0.00267773	0.00266539	0.00331673	0.00284754	0.00514465	0.00172715	0.00470193	0.00182882	0.00348236	0.000630319	0.00315848	0.00132794	0.00210012	0.00259719	0.00526673	0.00367145	0.00507521	0.00321371	0.00279762	0.0034053	0.00222414	0.00422319	0.00599963	0.00114155	0.000807223	0.0023524	0.00684212	0.0022984	0.00485176	0.00534672	0.00145584	0.000270812	0.00217072	0.0031263	0.00185931	0.00448197	0.00539724	0.00186185	0.00164992	0.00428172	0.00383496	0.0044973
TCGTGC	0.000772394	0.000656423	0.000190499	0.000148013	0.00133623	0.000269499	0.000921452	0.000307087	0.00143296	0.000434311	0.00135476	0.000111956	0.000692362	0.000147685	0.000600104	0.000350822	9.7548e-05	0.000434305	0.000672384	0.000134498	0.00118754	7.68174e-05	0.00206327	0.00072584	0.00239893	0.000592616	0.00137413	0.000429482	0.00279542	0.00065877	0.000291226	5.00831e-05	0.000361731	2.60252e-05	0.000867701	0.000152118	0.00275376	0.000107625	2.67475e-05	0	0.00199803	0.000582944	0.00241979	0.000811523	0.000125252	0.000431317	0.00262651	0.00223404	0.00241168
TTCGTG	0.000356695	0.00036087	0.000163331	0.000128355	0.000571367	7.91894e-05	0.000734352	9.3361e-05	0.000523827	0.000128941	0.000426062	4.40053e-05	0.000350246	3.92087e-05	0.000457746	0.000280985	9.7548e-05	8.48649e-05	0.000582279	5.77753e-05	0.000837999	2.02231e-05	0.000972264	0.000388006	0.00110851	0.000208981	0.000919743	0.000121532	0.00142328	0.000353596	5.05819e-05	5.77227e-06	0.000258379	5.23541e-06	0.000288311	0	0.000849651	3.32691e-05	1.34127e-05	1.34544e-05	0.000335555	0.000269674	0.00170065	0.000246422	7.92535e-05	0.000156525	0.000764087	0.000787564	0.00053046
CTTCGT	0.000614247	0.000409581	0.00279613	0.000219972	0.000877744	8.48635e-05	0.00114695	0.000102899	0.000818975	0.000177054	0.00136047	5.48819e-05	0.000730871	5.65205e-05	0.000718356	0.000351644	0.000189887	0.000102604	0.000650229	8.3026e-05	0.000986161	3.50227e-05	0.00100491	0.000367043	0.00168226	0.000264372	0.00123237	0.000163983	0.00174486	0.000367341	0.000382605	2.93971e-05	0.000528367	1.43709e-05	0.000471571	0	0.000980225	6.52503e-05	9.13243e-05	2.07481e-05	0.000344774	0.000287019	0.00198229	0.000290473	9.81321e-05	0.000240047	0.00116416	0.000916818	0.00112519
AATCCG	0.000424138	0.000495865	0.000160563	0.000337283	0.000821675	0.000114264	0.000969101	0.00022689	0.00116959	0.000249254	0.00077922	0.000177034	0.000521369	9.58927e-05	0.00052148	0.00034748	9.7548e-05	0.000302594	0.000496052	7.24301e-05	0.000884381	3.09068e-05	0.00100109	0.000527686	0.00137784	0.000323841	0.000894588	0.000125523	0.00177329	0.000485393	3.02741e-05	2.96897e-05	0.000258379	0.000143928	0.000322773	0.000201871	0.00195665	2.81064e-05	2.52353e-05	6.60426e-06	0.000353019	0.000305478	0.00149178	0.00048709	0.000128981	0.000160033	0.00187639	0.00143698	0.00184082
ACAATC	0.000824079	0.00166203	0.000904062	0.00169294	0.00159281	0.00148088	0.00144606	0.00168877	0.00220076	0.00158008	0.00181899	0.00206895	0.00097241	0.0021644	0.00151064	0.000954819	0.000600233	0.00348439	0.00150197	0.00106679	0.00245512	0.00373097	0.00205655	0.00282057	0.00181657	0.00159594	0.00117856	0.000921923	0.00294816	0.00176214	0.000260187	0.000246324	0.00168422	0.00343503	0.001305	0.00131683	0.00382281	0.00149851	0.0014375	0.00114252	0.00120998	0.00227784	0.00265341	0.00240867	0.00104597	0.00112844	0.00282253	0.00289987	0.00293979
TACAAT	0.000853127	0.0016104	0.000859192	0.00155174	0.00165713	0.000356187	0.0015048	0.00148364	0.00215652	0.00132127	0.00175387	0.00140328	0.00111252	0.000427549	0.00157093	0.00156287	0.000541735	0.0025421	0.000924805	0.0010697	0.00245512	0.000580652	0.00209612	0.00152079	0.00182009	0.000877558	0.00121014	0.000749455	0.0029019	0.000956149	0.000296759	0.000447806	0.00165223	0.000895853	0.00111883	0.00131754	0.00383069	0.00143068	0.0014375	0.000410586	0.00119236	0.00226219	0.00234824	0.00108274	0.000864354	0.00101373	0.00293198	0.00262351	0.00294351
ACTTTA	0.00157346	0.00260569	0.000555477	0.00150246	0.00263393	0.0051378	0.00145134	0.00235017	0.00233873	0.00287343	0.0020776	0.00351251	0.00182098	0.0045272	0.00249398	0.00261691	0.00275861	0.00373171	0.00132491	0.00244648	0.00208499	0.00457003	0.00245366	0.00391568	0.00324898	0.00303195	0.00185642	0.00319801	0.00399948	0.00509519	0.00106023	0.00271967	0.000546243	0.00505219	0.00119435	0.00273669	0.00386101	0.00228616	0.000514392	0.00334456	0.00337996	0.00172624	0.00332815	0.00427867	0.0017686	0.00192033	0.00339158	0.00368201	0.00274962
CACTTT	0.00190777	0.00126386	0.00278782	0.00115876	0.00329904	0.000661932	0.00291783	0.000713468	0.00301769	0.000983156	0.00217089	0.000599484	0.00217949	0.000668124	0.00183873	0.000856475	0.00140351	0.000943966	0.00238106	0.000303709	0.00287308	0.000611318	0.00296743	0.0012946	0.00384191	0.00115739	0.00321049	0.00110375	0.00463625	0.00128335	0.00153506	6.83761e-05	0.00343016	0.00116768	0.00195866	0.000467213	0.00407085	0.000366158	0.00062603	0.000180117	0.00237656	0.00103309	0.00393726	0.00149907	0.000457234	0.000857001	0.00411851	0.00288685	0.00473
GCACTT	0.00159928	0.00112976	0.00130451	0.000507306	0.0025432	0.000546726	0.00151748	0.000515557	0.00226305	0.000829012	0.00164992	0.000383486	0.00118129	0.000613787	0.00120696	0.000762837	0.00133892	0.000810992	0.00193694	0.000721295	0.00166562	0.000179877	0.00259294	0.000882868	0.00261966	0.000832543	0.00190797	0.000963069	0.00326324	0.000728695	0.000986805	6.75195e-05	0.00230106	0.000166985	0.00140591	0.000639259	0.00295207	0.000944241	0.00096527	0.000774181	0.00223571	0.00103973	0.00285076	0.000995793	0.000476584	0.000791343	0.00329819	0.00259837	0.00364723
AGCACT	0.00158511	0.00109628	0.00130451	0.000515833	0.00256521	0.000546015	0.00151748	0.000457016	0.00226305	0.000767609	0.0016707	0.00031564	0.00116926	0.000435722	0.00124297	0.000731717	0.00133892	0.000658989	0.00193694	0.000491289	0.001722	0.000165509	0.002612	0.000868975	0.00265287	0.000762848	0.00190698	0.000895988	0.00326324	0.000695748	0.000968447	6.75195e-05	0.00233158	5.32909e-05	0.00141349	0.000639259	0.00295181	0.000419378	0.000953448	0.000220269	0.00224504	0.00100663	0.00291681	0.000952115	0.000418618	0.000768125	0.00330982	0.00242194	0.00360657
AAAGCA	0.00200937	0.00267699	0.00117429	0.00196698	0.00420028	0.0057005	0.00245499	0.00231235	0.00335916	0.00332339	0.00308141	0.00501467	0.00188392	0.00450628	0.0023263	0.00358316	0.00164031	0.00300109	0.00213117	0.00209988	0.00290966	0.00497538	0.00405085	0.00489116	0.00329177	0.00278825	0.00383529	0.0024675	0.00470261	0.00592254	0.00167812	0.000795591	0.00389308	0.00637567	0.00244586	0.00418063	0.0049493	0.00146886	0.000674806	0.00217076	0.00323217	0.00211845	0.00454693	0.00529598	0.00187828	0.0017446	0.00465924	0.00384771	0.00551025
TGAAAG	0.000806574	0.000671959	0.000312317	0.000183884	0.00135303	0.000290953	0.0008615	0.000327132	0.00147751	0.000443011	0.00146758	0.000147663	0.000801601	0.000221666	0.000619112	0.000449264	9.7548e-05	0.000443841	0.000522486	0.000141843	0.00121913	8.872e-05	0.00209172	0.000733818	0.00238214	0.000621226	0.00150079	0.000438633	0.00299794	0.000710174	0.000280508	3.91791e-05	0.000545231	0.000140055	0.000873363	0	0.0027451	0.000119527	0.000126111	2.90055e-05	0.00202248	0.000596001	0.00241694	0.000942878	0.000149236	0.000440973	0.00262809	0.00220831	0.00244741
CTGAAA	0.000798	0.00067671	0.000312317	0.000148013	0.00133549	0.000290953	0.000881484	0.000322852	0.00150103	0.000459111	0.00139708	0.000146993	0.000828046	0.00022496	0.000609688	0.000417317	9.7548e-05	0.000467949	0.000506527	0.000150545	0.0012456	8.872e-05	0.00210609	0.000741345	0.00237913	0.000639434	0.00151754	0.000442798	0.00299794	0.000741997	0.000280394	3.91791e-05	0.000377073	0.000140055	0.000894601	0.000152118	0.00275088	0.000119913	8.64142e-05	2.90403e-05	0.00198859	0.000534298	0.00246558	0.000933554	0.000149259	0.000436144	0.00267637	0.0022882	0.00244741
GCTGAA	0.000480493	0.000507037	0.000163331	0.000117641	0.00090948	0.000111443	0.000919916	0.00016181	0.00114147	0.000261616	0.000757648	0.000535227	0.00063142	0.000158327	0.000513445	7.00415e-05	9.7548e-05	0.000296236	0.000465825	5.51483e-05	0.000908951	5.25054e-05	0.00107674	0.000398935	0.00147193	0.000311462	0.000957224	0.000228538	0.00208066	0.000572515	7.60243e-05	4.27982e-05	0.000305299	0.00050434	0.000340411	0	0.00209549	8.25314e-05	3.75583e-05	0.00010429	0.000377928	0.000509416	0.00223035	0.00046693	8.65346e-05	0.000277998	0.00200871	0.00186925	0.00195537
TGCTGA	0.000887073	0.000634961	0.000991434	0.000180306	0.001414	0.000294901	0.00124737	0.000309028	0.00190252	0.00053742	0.000993388	0.000121485	0.000997899	0.000321334	0.000605259	0.000213042	0.000444691	0.000460404	0.00102034	0.000263024	0.00151364	0.000218126	0.00155805	0.000609398	0.00217754	0.000429823	0.00235057	0.000525968	0.00280397	0.000644507	0.000753693	3.71467e-05	0.00104702	0.000511033	0.000669031	0.000419533	0.00285977	0.000162089	8.60844e-05	8.39997e-05	0.000438585	0.00033146	0.0034867	0.000604846	0.00018524	0.000321526	0.00236723	0.00179322	0.00218106
CCTGCT	0.00119572	0.00121093	0.00137305	0.000479702	0.00209683	0.0016513	0.00255594	0.00127085	0.00223524	0.0013547	0.00174188	0.000469781	0.00324911	0.0013888	0.000917677	0.0012909	0.00115674	0.000696497	0.000817712	0.0011586	0.00111493	0.000784739	0.00144685	0.000871627	0.0024204	0.00087785	0.00117109	0.000537673	0.00289888	0.000871574	0.00223933	0.000148365	0.0014714	0.000630415	0.00112607	0.00132043	0.00298061	0.00105127	0.0011655	0.00141331	0.000572995	0.000960313	0.00358691	0.00120043	0.00054484	0.00131578	0.00235977	0.00219275	0.00221976
CCCTGC	0.000679018	0.00165219	0.000837154	0.00116594	0.00169548	0.00171813	0.00129142	0.00204804	0.00155574	0.00208593	0.00130122	0.000798425	0.000881407	0.00149233	0.00138787	0.00196137	0.000334615	0.0028147	0.000918847	0.00169017	0.00201473	0.00123811	0.00238397	0.00148229	0.00227052	0.00108858	0.00138243	0.000789208	0.00363701	0.00112273	0.000217341	8.01548e-05	0.00106496	0.00106942	0.000825958	0.00153239	0.00403428	0.00215344	0.00123104	0.00165165	0.0013896	0.00226315	0.00357534	0.00111034	0.000859252	0.00173512	0.00272275	0.00345859	0.00255978
TCACTT	0.000778488	0.00076789	0.00167659	0.000654191	0.00130972	0.000686848	0.0020579	0.000586492	0.00173888	0.000675033	0.0015683	0.000461161	0.0013962	0.000722442	0.00148287	0.000612825	0.0020965	0.00110596	0.000817568	0.00025758	0.00134773	0.000558883	0.00207234	0.000984852	0.00240071	0.00104149	0.00152016	0.000722278	0.00237786	0.000923181	0.000557163	6.25739e-05	0.00150037	0.00105952	0.00132839	0.000500858	0.00200586	0.000252807	0.000172737	0.000226705	0.00239474	0.000735779	0.00181838	0.00106069	0.000356907	0.000567841	0.00143051	0.00185409	0.00157703
GTCACT	0.000770056	0.000778309	0.00170227	0.000564071	0.00118402	0.000386809	0.00177955	0.000549181	0.00145373	0.000516605	0.00139675	0.000261497	0.00156533	0.000427982	0.00064583	0.000487359	0.000191006	0.000541778	0.00078532	0.000230664	0.00191483	0.000110731	0.0020752	0.000744581	0.00233193	0.000826879	0.00150423	0.000481892	0.00238681	0.000670095	0.000539182	6.22685e-05	0.00145231	0.000303063	0.0012072	0.000294696	0.00180133	0.000155304	0.000172737	4.99381e-05	0.00202283	0.000646613	0.00178744	0.000859256	0.000288691	0.000521015	0.00164383	0.00171461	0.00163446
GCAGGT	0.000940873	0.00194057	0.000698255	0.00121651	0.00193799	0.00586465	0.00131983	0.00194638	0.00149465	0.0022786	0.00131449	0.00290006	0.00127079	0.00452479	0.000964786	0.00287572	0.000356939	0.00223467	0.000578899	0.00244637	0.00156727	0.00483043	0.00145986	0.00351201	0.00182645	0.00204441	0.00133733	0.0010123	0.00263242	0.00497282	0.000559767	0.000385786	0.000572803	0.00496484	0.000767651	0.00315107	0.0028623	0.00192232	0.000567078	0.00305436	0.000936388	0.000937	0.00313976	0.00441116	0.00147242	0.00153463	0.00251322	0.00238132	0.00231764
TGCAGG	0.00136902	0.00418832	0.00145945	0.00348392	0.00428836	0.0114122	0.00275231	0.00472465	0.00290414	0.00568794	0.00296858	0.00804559	0.00219364	0.00891569	0.00287567	0.00664637	0.000897019	0.00690224	0.0017166	0.00506426	0.00381104	0.00977707	0.00401147	0.00816693	0.00273412	0.00449134	0.00354465	0.00300431	0.00466447	0.010464	0.00136948	0.00108067	0.00300094	0.0115337	0.00234129	0.0074064	0.00598057	0.0043479	0.00147442	0.00541075	0.00285577	0.00354285	0.00513864	0.00879508	0.00348716	0.00305794	0.00461675	0.00509904	0.00481572
CTGCAG	0.000495119	0.000941962	0.000136163	0.000382842	0.00088766	0.00142218	0.000881121	0.00107703	0.00110628	0.00110074	0.000757648	0.000365161	0.000634651	0.00110674	0.00044735	0.00118302	9.7548e-05	0.000413642	0.000434317	0.000789664	0.000907441	0.000473202	0.0010394	0.000573817	0.00146244	0.000575164	0.00100446	0.000279739	0.00198295	0.000699506	3.93088e-05	2.59294e-05	0.000258379	0.00016555	0.000302709	0.00101368	0.0020524	0.000935291	2.53585e-05	0.00133151	0.000335555	0.000788048	0.00218749	0.000870067	0.000422804	0.00104096	0.00198238	0.00180138	0.00179899
TCTGCA	0.000566283	0.00105291	0.00162226	0.0007129	0.000986518	0.00145875	0.00172644	0.00126597	0.00125159	0.00112408	0.000799641	0.000492856	0.001372	0.00117694	0.000511815	0.00121398	0.00016214	0.000440985	0.000665234	0.000836053	0.000940685	0.000920242	0.00104652	0.000583577	0.00150667	0.00075208	0.00106902	0.000289402	0.00198295	0.00070416	0.00037807	3.74444e-05	0.00137989	0.000294986	0.00064044	0.00108897	0.00208127	0.000997812	0.000171348	0.00132415	0.000344828	0.000864583	0.00220248	0.000999077	0.000548673	0.00109631	0.00200894	0.00181836	0.00188054
TTCTGC	0.00120345	0.000633487	0.00106325	0.00047593	0.00183577	0.000135202	0.00148982	0.000219903	0.00219286	0.000567198	0.00101017	0.00021208	0.000863091	0.000193308	0.00102774	0.000136123	0.00114046	0.000299578	0.00123422	8.11058e-05	0.00149394	0.00044704	0.00150144	0.000500119	0.00166083	0.00038547	0.00200871	0.000466963	0.00225423	0.000558009	0.00106943	5.35705e-05	0.00187553	0.00026006	0.000467597	0	0.00221295	0.000107943	0.000322333	2.90055e-05	0.00051243	0.000492808	0.00245354	0.000510439	0.000147936	0.000206486	0.00258291	0.0016929	0.00296285
CTTCTG	0.00151367	0.00177039	0.000585904	0.000708818	0.00224283	0.000826495	0.00120044	0.00155133	0.0021985	0.00155268	0.00184442	0.000751505	0.00151179	0.00137067	0.00213026	0.000795886	0.00258303	0.00177117	0.00138873	0.00103566	0.00177697	0.000387489	0.00239326	0.000972222	0.0031735	0.00160733	0.00181188	0.00240325	0.00334649	0.00102495	0.000745381	0.00262124	0.000530008	0.000488071	0.00100612	0.000467865	0.00327223	0.00131813	0.000611445	0.00157313	0.00318054	0.00158118	0.00268421	0.00108781	0.000719068	0.0013469	0.00307607	0.0033854	0.00256131
GCTTCT	0.00185834	0.00176006	0.00533977	0.000962826	0.00308711	0.000850594	0.0036163	0.00163706	0.00317274	0.00154713	0.00293833	0.000735823	0.00473483	0.00142078	0.00271318	0.000806648	0.00315575	0.00184743	0.00167357	0.00109478	0.00197452	0.000489899	0.00198553	0.000977671	0.0035111	0.00173475	0.00166328	0.00235082	0.00353057	0.00105142	0.00274769	0.00255619	0.00262554	0.00078578	0.00135015	0.000663394	0.00352346	0.00138769	0.00115165	0.00157247	0.00171537	0.0014555	0.00384102	0.00101722	0.000864876	0.00137971	0.00313357	0.00312524	0.0026245
CGCTTC	0.00135428	0.000536541	0.00243951	0.000362872	0.00187796	0.000111083	0.00308784	0.000299963	0.00213294	0.000261255	0.00129681	5.54955e-05	0.00348348	9.86825e-05	0.000800474	0.000382925	0.000726163	0.000327887	0.000730108	9.47293e-05	0.00107148	2.02231e-05	0.00119172	0.000535912	0.00175244	0.000550833	0.000977821	0.000165871	0.00198295	0.000589992	0.00227858	6.4812e-05	0.00223449	1.05643e-05	0.000962676	7.52877e-05	0.00212118	0.000120475	0.000537474	3.64491e-05	0.000371259	0.000327282	0.00222617	0.000635605	0.000213981	0.000285892	0.00217641	0.00172301	0.00198295
TCGCTT	0.000495025	0.000522006	0.00159525	0.000353927	0.000953478	0.000104905	0.00160853	0.000289659	0.00130791	0.00022885	0.000715328	4.99736e-05	0.00116738	4.09248e-05	0.000448299	0.000351644	0.000190564	0.0002634	0.000631379	8.60727e-05	0.000875014	2.02231e-05	0.000993583	0.000455373	0.00149024	0.000375794	0.000970216	0.000131357	0.00198295	0.000575455	0.000370115	6.51059e-06	0.00134896	3.44767e-05	0.000597412	7.52877e-05	0.00201095	0.000111584	0.000159402	7.4441e-06	0.000354155	0.000275579	0.00212933	0.000578706	0.00020953	0.000241549	0.00200894	0.00162345	0.00179969
GTCGCT	0.00159526	0.00134004	0.00510268	0.00128767	0.0022608	0.00171298	0.00349434	0.00131288	0.00251677	0.00175135	0.00216118	0.000743546	0.00404924	0.001383	0.0011943	0.00160662	0.000818047	0.00103501	0.00105525	0.000961037	0.00141721	0.000686434	0.00157616	0.000987199	0.00269577	0.00104235	0.00133478	0.000507027	0.00341054	0.000940852	0.00279818	0.000334593	0.00221661	0.000538798	0.00134004	0.00180087	0.00298702	0.00111082	0.00058783	0.00130954	0.000466026	0.00118169	0.00358844	0.00148495	0.000720037	0.00138351	0.00273596	0.00236318	0.00274179
CGTCGC	0.00202543	0.00119524	0.00510293	0.000710246	0.00236414	0.0017194	0.00360742	0.00133275	0.00249136	0.00136442	0.00216118	0.000442377	0.00408334	0.00138632	0.00125047	0.00166854	0.000876085	0.000758124	0.00100119	0.000993579	0.00145344	0.00068349	0.00160828	0.000891909	0.00271153	0.0012137	0.00134238	0.000515336	0.00308002	0.00105064	0.00281631	8.56692e-05	0.00221661	0.00064852	0.00141184	0.00136242	0.00305729	0.00114099	0.000599652	0.00130954	0.000474163	0.00113299	0.00368822	0.00140848	0.000733888	0.00137933	0.00274748	0.0022457	0.00277784
CCGTCG	0.000429053	0.000504027	0.000236479	0.000235858	0.00104332	0.00010366	0.000873839	0.000207629	0.00126492	0.000263523	0.000781812	0.000100843	0.000477135	4.96265e-05	0.000513945	0.000351644	0.000126265	0.000318172	0.000432217	9.08702e-05	0.000884382	6.31624e-05	0.00117789	0.000558887	0.00158884	0.000463499	0.00107296	0.000188749	0.00198295	0.000700007	0.000175424	1.8085e-05	0.000304487	7.67185e-05	0.000433731	3.39974e-05	0.00223686	9.91799e-05	3.68778e-05	2.08038e-05	0.000463382	0.000277986	0.002341	0.000527585	0.000116788	0.000220118	0.00202088	0.00179226	0.00183619
TTTAGC	0.000726728	0.000657106	0.000214965	0.000166564	0.00144091	0.000269909	0.000902519	0.000312278	0.00147085	0.000453732	0.001379	0.000110268	0.000889912	0.000147522	0.000591083	0.000421481	9.7548e-05	0.000471478	0.000506527	0.000152603	0.00183006	0.000101886	0.00204545	0.00071286	0.00238868	0.000638041	0.00146691	0.000429025	0.00310271	0.000711506	0.000343262	3.85083e-05	0.00037676	8.49939e-05	0.000889567	0.000152118	0.00291633	0.000128511	5.05809e-05	1.34507e-05	0.00202278	0.000579517	0.00248575	0.000822167	0.00013399	0.000460718	0.00287413	0.00226656	0.00265562
ATTTAG	0.00134182	0.00110107	0.000408786	0.000674266	0.00199329	0.000710789	0.00114235	0.00115922	0.00196871	0.00113537	0.00148217	0.000442693	0.00116879	0.000862582	0.002035	0.000702366	0.0025214	0.00152164	0.00114786	0.000655138	0.002184	0.000328273	0.00226843	0.000872186	0.00277494	0.00118123	0.00159329	0.0012041	0.00314776	0.000884732	0.000746963	0.00147774	0.000484063	0.000270613	0.000915307	0.000320344	0.0030704	0.000653528	0.000442074	0.000935112	0.00315159	0.00137311	0.0026293	0.000855258	0.000485461	0.000977644	0.00304981	0.00258575	0.00262066
TATTTA	0.0007259	0.000995019	0.000190499	0.000200212	0.00136414	0.000245095	0.000955873	0.000511743	0.00148037	0.00057168	0.00135532	0.000281236	0.000890175	0.00022979	0.000637898	0.000421481	9.7548e-05	0.000493336	0.000667027	0.000245287	0.00181751	9.42433e-05	0.00201942	0.000773287	0.00238781	0.00085084	0.00145765	0.000558206	0.00305156	0.000668258	0.000353413	9.65008e-05	0.000361731	0.00029275	0.000888763	0.000152118	0.00293322	0.00013727	6.2339e-05	3.33635e-05	0.00197663	0.000600086	0.00244263	0.000855089	0.000182675	0.000641032	0.00293863	0.00239128	0.00262066
GTATTT	0.000726506	0.00104929	0.000191458	0.000148304	0.0014348	0.000441417	0.000983334	0.000549992	0.00147252	0.000648844	0.00133261	0.000205017	0.00100241	0.000391936	0.000730284	0.000564481	9.7548e-05	0.000509781	0.000706777	0.000306366	0.00137563	0.00025935	0.00231275	0.000943239	0.00275155	0.000942345	0.00155261	0.000714766	0.00357031	0.000744437	0.000415583	9.74241e-05	0.000431759	0.000532159	0.00104371	0.000538179	0.00345229	0.000177105	8.94829e-05	3.33635e-05	0.00207072	0.000653415	0.00348723	0.000899931	0.000263988	0.000775542	0.00282503	0.00251081	0.00253489
CGTATT	0.000703112	0.000651583	0.000163644	0.000138241	0.00129946	0.000244985	0.000881727	0.000284975	0.00142163	0.000400723	0.00130836	8.1224e-05	0.000692578	0.000140499	0.000611451	0.000421481	9.7548e-05	0.000442506	0.000488631	0.000134719	0.00123415	7.23285e-05	0.00197754	0.000707333	0.00231544	0.000615037	0.00143272	0.000408005	0.00284597	0.000648515	0.000332317	3.27061e-05	0.000361731	7.55452e-05	0.000864715	0.000152118	0.00274305	0.000102613	2.67475e-05	0	0.00196751	0.000538677	0.00235342	0.000762015	0.00011532	0.000421964	0.00264175	0.00219816	0.00232989
ACGTAT	0.000702174	0.000661902	0.000163644	0.000138241	0.00129946	0.000244985	0.000881727	0.000284531	0.00142163	0.000400785	0.00128468	0.000108168	0.000692578	0.000170319	0.000611451	0.000421481	9.7548e-05	0.000447164	0.000488631	0.000143111	0.00122294	0.000105079	0.00197754	0.000711096	0.00230718	0.000623828	0.00143272	0.000408005	0.00284597	0.000658121	0.000323138	3.84784e-05	0.000361731	9.45932e-05	0.000871404	0.000152118	0.00271463	0.000115565	2.67475e-05	6.85016e-06	0.00197557	0.000538677	0.00236065	0.000751095	0.00011532	0.000426104	0.00264175	0.00221434	0.00232989
CGCTGC	0.0012159	0.000752983	0.00488467	0.000617351	0.00143391	0.00169833	0.00268963	0.0011822	0.00125587	0.00115343	0.00162788	0.0004317	0.00355687	0.00137069	0.000716654	0.00130844	0.00080665	0.000322315	0.000496131	0.000868065	0.000648065	0.000640179	0.000433823	0.000404896	0.00101384	0.000747096	0.000429553	0.000408691	0.000633388	0.000440779	0.00281073	9.06329e-05	0.0019408	0.00029199	0.000902803	0.00134786	0.000403215	0.00115215	0.000606387	0.00137788	0.000111513	0.000872415	0.000550648	0.000816128	0.000646814	0.00115398	0.000657455	0.000504417	0.00126383
ACGCTG	2.85977e-05	0	0	0	5.06195e-05	4.11831e-05	0	9.83916e-06	0	2.29038e-05	0	0	0	2.96652e-05	0	0	0	6.31886e-05	0	3.38686e-05	1.1095e-05	1.78855e-05	0	4.05299e-05	0	3.92554e-05	0	1.2563e-05	0	4.63043e-06	0	0	0	2.32707e-05	2.02252e-05	3.34717e-05	0	4.75134e-05	0	4.64684e-05	0	1.66208e-05	0	8.73241e-05	7.10377e-05	2.98314e-05	0	2.94897e-06	4.13787e-05
TACGCT	1.51723e-05	2.71729e-05	0.000138416	3.0011e-05	0.000152581	2.69515e-05	2.12847e-05	0	6.30758e-05	3.77967e-05	7.23075e-05	5.55045e-06	5.61756e-05	8.53343e-05	3.10077e-05	0	0	3.0735e-05	0	1.93505e-05	1.26706e-05	9.75228e-05	0.000226171	3.87375e-06	0.000226483	2.9295e-05	0.000188427	4.27811e-05	5.08518e-05	5.81374e-05	0.00012253	1.16044e-05	0.000121799	3.65462e-05	0.000198294	0	0.000144027	4.95367e-06	3.55902e-05	0	2.83124e-05	0	0.000227629	2.3392e-05	4.06712e-05	0.000173457	5.34281e-05	0.000109589	8.30038e-05
CTACGC	9.27211e-05	5.8547e-05	0.000199127	1.87182e-05	0.000182506	0	0	2.48548e-05	0.0001236	9.82308e-05	0.000215326	2.25549e-05	7.65303e-05	2.40288e-05	0.000101915	0.00031913	0	1.83181e-05	0.000230377	1.74972e-05	0.00011378	5.13653e-05	0.000496455	5.8998e-05	1.80079e-05	8.92849e-06	0.000337454	0.000106829	0.000185014	0	0.000152535	1.15445e-05	0.000313361	3.81469e-05	0.000185649	0	0.000565522	4.40468e-05	5.96667e-05	1.99493e-05	0.000194992	8.52519e-05	0.000218368	2.27194e-05	4.44215e-05	1.28137e-05	0.000119944	0.000284182	3.64219e-05
GGTCCA	0.000332944	0.000219088	2.7168e-05	1.96583e-05	0.000521866	0.000183729	0.000120958	0.000183296	0.000297853	0.000200922	0.000639429	0.000100188	0.000229631	0.000114009	0.000151361	6.98373e-05	0	0.000171613	0.000106064	0.000136013	0.000451703	7.43496e-05	0.00107386	0.000297158	0.000953057	0.000313499	0.000503945	0.000316883	0.00116601	8.8242e-05	0.000231052	2.61955e-05	0.000133955	3.50506e-05	0.00059694	0.00018559	0.000741174	9.55715e-05	1.33348e-05	6.85016e-06	0.00164408	0.000318772	0.000289986	0.00031757	4.00182e-05	0.00024592	0.000645709	0.000623309	0.000570863
TGGTCC	0.00030896	0.000150149	2.7168e-05	9.82917e-06	0.000310336	0.000171173	7.91311e-05	0.000128216	0.000285371	0.000162229	0.000355096	5.76508e-05	0.000221875	0.00012392	0.000151361	6.98373e-05	0	0.000146364	0.000106064	0.000127578	0.000349545	5.54696e-05	0.0010111	0.000280217	0.000850078	0.000293778	0.000495394	0.000312761	0.00111516	5.66518e-05	0.000160587	2.61955e-05	0.000133955	3.02886e-05	0.000590308	0.00018559	0.000725849	8.14308e-05	1.33348e-05	1.34544e-05	0.00163481	0.000318772	0.000216088	0.000292775	3.50234e-05	0.000198775	0.000606336	0.000592537	0.000530206
TTGGTC	0.000867363	0.0023868	0.00106802	0.00216011	0.00208641	0.00563741	0.00109273	0.00285338	0.00156536	0.00322459	0.00137271	0.00482941	0.00112338	0.00442723	0.00172949	0.00345746	0.0005317	0.00467131	0.000629978	0.00268994	0.00245571	0.00535973	0.00252317	0.00476299	0.0016891	0.00275286	0.00193131	0.00201708	0.00333487	0.00556792	0.00102163	0.000753802	0.000540913	0.00619461	0.00172804	0.00440237	0.00353658	0.00253082	0.00127933	0.00234402	0.00287255	0.00235531	0.00182384	0.00482225	0.00205111	0.00167566	0.00211914	0.00243823	0.00142238
TTTGGT	0.000146268	8.8432e-05	0.000147704	8.8514e-06	5.85369e-05	0.000164638	7.61636e-05	0.000113461	6.70493e-05	0.000146413	0.000107149	2.29323e-05	5.43962e-05	9.81505e-05	6.30826e-05	9.68379e-05	5.78812e-05	0.000150429	0.000131653	6.51482e-05	1.09812e-05	4.03765e-05	0.000327173	0.00017748	3.72255e-05	0.000251164	3.79366e-05	0.00019659	0.000101707	4.17907e-05	5.30681e-05	3.17668e-05	0.000144624	2.02476e-05	5.06832e-05	0.000221198	7.82442e-05	5.19921e-05	0.000284319	0	0.00142812	0.000279068	4.0031e-05	0.000242625	3.88727e-05	0.000336857	4.64858e-05	0.000124755	7.32433e-05
AGACTT	0.00276147	0.00415698	0.00180863	0.00461842	0.00243987	0.00531367	0.0033125	0.00283104	0.00249127	0.00327247	0.00310427	0.00534185	0.00323514	0.00408533	0.00229688	0.00500189	0.00181006	0.00305003	0.00450822	0.00587713	0.00191289	0.00351951	0.00221758	0.00410353	0.00313942	0.00573646	0.00139018	0.00437284	0.00218001	0.00511853	0.00309825	0.00670785	0.00280059	0.00646965	0.00547035	0.00386468	0.00168616	0.00375981	0.00293116	0.00303664	0.00384657	0.0029782	0.00264032	0.00590384	0.005836	0.00489663	0.00209435	0.00359074	0.0027072
ATCGTG	0.000463277	0.000450122	2.7168e-05	1.96583e-05	0.000799665	0.000184231	0.000145028	0.000277003	0.000485091	0.000265931	0.00068164	0.000117206	0.000350314	0.000121181	0.000142358	6.98373e-05	0	0.000358945	9.01058e-05	9.3767e-05	0.000393925	5.65944e-05	0.00108315	0.000343359	0.00103158	0.000432902	0.000538656	0.000312225	0.0014114	0.000274331	0.000250619	3.77111e-05	0.000118694	2.07898e-05	0.000602707	0.000152118	0.0018778	0.000156466	1.33348e-05	0	0.00165315	0.000318065	0.00071078	0.000565101	5.94254e-05	0.000241716	0.00207307	0.00148434	0.00188122
CATCGT	0.000406757	0.00027409	2.7168e-05	1.96583e-05	0.000720866	0.000239251	0.000166567	0.000280894	0.000497796	0.000349536	0.000639429	8.72644e-05	0.000351262	0.000186481	0.00016309	6.98373e-05	0	0.000488405	9.01058e-05	7.67231e-05	0.000349545	0.000101817	0.00109031	0.000386178	0.000973822	0.00040217	0.000576211	0.000331393	0.0013152	0.000285323	0.000250619	2.61955e-05	0.000103352	4.74981e-05	0.000590308	0.000190315	0.00179983	0.000111637	1.33348e-05	0	0.00167798	0.000331619	0.000704103	0.000577426	5.98005e-05	0.000280352	0.00191601	0.00114762	0.00192118
TCATCG	0.000929004	0.000382756	0.000364461	0.00028242	0.00152258	0.000238532	0.000427013	0.000290629	0.00119327	0.00055595	0.000678325	8.02858e-05	0.000432341	0.000198518	0.000716038	6.98373e-05	0.00118916	0.000497385	0.000925549	0.000110855	0.000460324	9.36363e-05	0.00136797	0.000409094	0.00106243	0.00044508	0.000651529	0.00054322	0.00136072	0.000280104	0.000435872	3.19977e-05	0.00170733	4.74981e-05	0.000631969	0.000190315	0.00188373	0.000155129	0.000344938	0	0.00170842	0.000546953	0.000704103	0.000565101	9.8996e-05	0.000288191	0.00237147	0.00115792	0.00227425
ACGTCA	0.000818682	0.00128789	0.000367272	0.000526163	0.000877257	0.000654299	0.000281658	0.00135936	0.000732348	0.00123017	0.000465415	0.000594577	0.00069228	0.00110445	0.00152847	0.000408842	0.00245271	0.00145743	0.000819911	0.000908871	0.0005332	0.000295369	0.000590751	0.000367574	0.000814096	0.00120517	0.000330789	0.0021403	0.000857384	0.000289759	0.000438778	0.00255059	0.000189349	0.000312583	0.000103927	0.000355068	0.000628197	0.00124101	0.000510584	0.00153559	0.00271681	0.00123448	0.000293811	0.000354192	0.000568544	0.00124009	0.000421425	0.0012905	3.64219e-05
AACGTC	0.000818682	0.00116382	0.000367272	0.000526163	0.000866091	0.000648468	0.000281658	0.00132032	0.000720934	0.00120701	0.000465415	0.000600127	0.000700479	0.00111427	0.00152847	0.000439801	0.00245271	0.00149766	0.000915912	0.000934439	0.00051101	0.000302425	0.000584399	0.000364182	0.000814096	0.00121815	0.000338276	0.00212359	0.000857384	0.000289759	0.000420421	0.00252744	0.000189349	0.000312461	0.000107226	0.000320344	0.000632963	0.00125391	0.000510584	0.00152892	0.00271681	0.00124071	0.00030042	0.000364836	0.000568544	0.00124427	0.000409729	0.00129331	7.24683e-05
AAACGT	4.65658e-05	6.99762e-05	2.7168e-05	1.68225e-05	2.5139e-05	0.000165233	2.09135e-05	0.00010362	2.27712e-05	0.000107558	0	1.15217e-05	2.78694e-05	7.77285e-05	0	3.49186e-05	0	0.000141754	1.79999e-05	5.63155e-05	0	4.03765e-05	0.00027189	0.000160338	3.72255e-05	0.000244254	8.3531e-06	0.000144852	0.000406832	4.17907e-05	0	3.19678e-05	5.16756e-05	1.55848e-05	3.01678e-05	0.000152118	9.27451e-05	4.39765e-05	0	0	0.00147674	0.000262555	6.70034e-05	0.000244996	2.99698e-05	0.000189826	0	0.000178781	0
AAAACG	4.65658e-05	6.99762e-05	5.08883e-05	1.68225e-05	2.5139e-05	0.000165233	2.09135e-05	0.00010362	3.39465e-05	0.000111494	0	2.27978e-05	2.78694e-05	7.77285e-05	0	3.49186e-05	0	0.000141754	1.79999e-05	5.63155e-05	1.10378e-05	4.4064e-05	0.000292646	0.000160338	3.72255e-05	0.000253408	1.57638e-05	0.000140729	0.000406832	4.17907e-05	0	2.61955e-05	5.16756e-05	2.03723e-05	3.01678e-05	0.000152118	9.77396e-05	5.26072e-05	0	0	0.00147674	0.000262555	6.70034e-05	0.000244996	3.88266e-05	0.000199179	0	0.000175906	0
AAAAAC	0.000221373	0.000197671	2.7168e-05	4.63615e-05	0.000424037	0.000176772	0.000141076	0.0001556	0.000234875	0.00022027	0.000585973	6.62336e-05	0.000218191	0.000116778	0.00037325	0.000101784	0	0.000144636	9.01058e-05	6.61791e-05	0.000504695	5.96923e-05	0.000942699	0.000303389	0.000777829	0.00029583	0.000570607	0.000278815	0.00143362	7.80348e-05	0.000297928	4.34238e-05	0.000146606	3.86599e-05	0.000506464	0.000113921	0.000710611	7.70004e-05	1.33348e-05	6.53721e-06	0.00154867	0.000305619	0.000281013	0.000269717	4.3851e-05	0.000238297	0.00082318	0.000601096	0.000645256
GAAAAA	0.000686512	0.000824678	0.000345942	0.000389116	0.00117307	0.000736884	0.000490678	0.000720022	0.000852189	0.000994523	0.000961808	0.00108896	0.00077117	0.000688077	0.000481245	0.000745698	2.87167e-05	0.000818194	0.000212294	0.000430366	0.00107069	0.00034781	0.00223391	0.00126594	0.00182	0.00099821	0.00167989	0.000765611	0.00309349	0.0011146	0.000570846	0.00034363	0.000219283	0.000521762	0.00130862	0.00109818	0.00262219	0.000333886	2.66695e-05	0.000184489	0.00307928	0.000922367	0.00138263	0.00140433	0.00054569	0.000762156	0.00267234	0.00190361	0.00248229
TTCCGA	0.000594983	0.000395577	0.000300189	0.000164379	0.00122414	0.000232707	0.000332412	0.000218283	0.000943955	0.000645778	0.00165776	0.000106332	0.000432242	0.000171159	0.000569601	0.000293296	0.000503138	0.000222249	0.00087963	0.00021661	0.000632715	7.46912e-05	0.00205937	0.000394588	0.00145331	0.000322428	0.0019123	0.000671516	0.00152354	7.8172e-05	0.000562153	4.22809e-05	0.00198298	9.22455e-05	0.00147522	0.000186658	0.00141076	0.000113843	0.000244003	2.69769e-05	0.00220243	0.000683948	0.000991859	0.000306478	4.45879e-05	0.000284873	0.0013662	0.00117389	0.00213222
CATTCC	0.00033345	0.000272837	5.4336e-05	1.96583e-05	0.000475549	0.000238251	0.000139693	0.000163242	0.000343099	0.000232197	0.000639429	0.000459258	0.000230159	0.000147365	0.000160458	6.98373e-05	0	0.000176126	0.000105983	0.000111764	0.000420011	8.89327e-05	0.00107533	0.000303862	0.0009448	0.000334912	0.000628051	0.000406343	0.00101499	8.30457e-05	0.00025106	7.76498e-05	6.8902e-05	0.000386498	0.000582913	0.000152118	0.000741582	0.000118569	1.33348e-05	7.52498e-05	0.00162527	0.000592216	0.00031624	0.000306478	7.66994e-05	0.000345159	0.000657405	0.000788341	0.000570863
ACATTC	0.000347901	0.000380693	2.7168e-05	5.55813e-05	0.000629833	0.000225973	0.000121452	0.000198243	0.000739753	0.000205188	0.000869853	9.4429e-05	0.00028742	0.000110429	0.000260458	6.98373e-05	0	0.000185345	0.000123042	8.54254e-05	0.000409804	5.98233e-05	0.00131027	0.00038071	0.00112258	0.000339328	0.000713312	0.000448961	0.00166303	0.000131198	0.000562906	4.79249e-05	0.000335424	5.35347e-05	0.000665189	0.000186658	0.00113519	0.000180817	9.86694e-05	6.81392e-06	0.00170144	0.000369931	0.000683248	0.000317688	0.00012687	0.000262915	0.00112556	0.000879321	0.000645256
TACATT	0.000369715	0.000552287	2.7168e-05	5.55813e-05	0.000664176	0.000184292	0.000122044	0.000257361	0.000864872	0.000405742	0.000639429	0.000116602	0.000402497	0.000193209	0.00021606	6.98373e-05	0	0.000189835	0.000252477	0.000145991	0.000406556	5.9691e-05	0.00144714	0.00040503	0.00113954	0.00049628	0.000752796	0.000545319	0.00175554	0.000131368	0.000607956	1.88536e-05	0.000366676	4.98614e-05	0.000734192	0.000186658	0.00112591	0.000167186	9.86694e-05	2.01593e-05	0.0017378	0.000398613	0.000690911	0.000317688	0.000174745	0.000263025	0.00117328	0.000936953	0.000682453
TTACAT	0.000357316	0.000321902	5.49829e-05	2.97215e-05	0.000577941	0.000374772	0.000166649	0.000263656	0.000370869	0.000311868	0.000687357	6.89551e-05	0.000344147	0.00027693	0.000224989	0.000212837	0	0.000228132	0.000179587	0.00016328	0.000533995	0.000225731	0.00144229	0.000502149	0.00136319	0.000440888	0.00065781	0.000484747	0.00173932	0.000175094	0.000468691	2.55192e-05	0.000398143	0.000394002	0.00081932	0.000538179	0.00148446	0.000122393	4.04786e-05	0	0.00183144	0.000456611	0.00139448	0.000444395	0.0001217	0.000371497	0.000793275	0.000822293	0.000654113
ACTGAA	0.00033918	0.000282226	0.000322583	9.32737e-05	0.000648612	0.000191638	0.000141177	0.000201145	0.000643642	0.000555299	0.000812762	8.45883e-05	0.000221875	0.000120756	0.000310607	0.000316317	0.000236752	0.000199633	0.000304277	0.000165971	0.00061068	7.2691e-05	0.00125166	0.000394626	0.00116377	0.000342528	0.00135236	0.000427429	0.00119505	0.000193496	0.000314467	4.36021e-05	0.000149946	2.07898e-05	0.000907846	0.000186658	0.000910583	9.08406e-05	6.10557e-05	6.85016e-06	0.00171279	0.000562015	0.000358089	0.000490365	9.47097e-05	0.000278761	0.000681731	0.000706583	0.000793269
AACTGA	0.00030301	0.000214621	2.7168e-05	1.96583e-05	0.000481756	0.00017834	8.37763e-05	0.000153128	0.000297853	0.000193076	0.000639429	5.49574e-05	0.000212567	0.000124894	0.000161744	0.00010496	2.93212e-05	0.000188737	0.000122188	9.48194e-05	0.00036064	5.24679e-05	0.00106915	0.000293676	0.000908795	0.000327302	0.00054615	0.000303494	0.000963533	8.39415e-05	0.000241085	6.09488e-05	0.000103352	2.6056e-05	0.000589547	0.000152118	0.000710693	8.30868e-05	0.000179586	1.33801e-05	0.00166105	0.000305039	0.000283214	0.000341949	5.95186e-05	0.000245855	0.000632585	0.000620167	0.000570863
CAACTG	0.000302053	0.000362493	5.13799e-05	0.000606119	0.000509766	0.000190566	8.37763e-05	0.000415829	0.000297853	0.000180766	0.000660426	6.05079e-05	0.00023782	0.000130905	0.000151698	0.00010496	2.85694e-05	0.000243154	9.01058e-05	0.000537319	0.000349545	8.11126e-05	0.00106915	0.000293676	0.000908795	0.000419253	0.00054615	0.000312101	0.00118928	0.000171996	0.000296801	0.000315776	0.000119361	3.00671e-05	0.000592845	0.000590565	0.000715609	8.20049e-05	2.52805e-05	0	0.0016257	0.000333194	0.000283214	0.00059257	5.45238e-05	0.000700326	0.000644403	0.000761658	0.000570863
CCAACT	0.000389892	0.000763912	0.000101611	0.000899156	0.000555024	0.000658642	0.000390876	0.000748388	0.000331031	0.000712635	0.000704317	0.00139814	0.000559564	0.00062242	0.000347371	0.000969088	2.88654e-05	0.000415777	9.01058e-05	0.000348157	0.00039616	0.000358652	0.0012399	0.000904617	0.000950788	0.000697813	0.000546307	0.00046984	0.00133236	0.000997623	0.000268673	0.000462158	0.000137404	0.000725888	0.000794066	0.00126069	0.000865372	0.000242807	2.50367e-05	0.000199329	0.00165182	0.000630002	0.000440348	0.00119517	0.000557936	0.000631305	0.000740656	0.000781064	0.000570863
CCCAAC	0.000397794	0.000716153	0.000101611	0.000460984	0.000560651	0.000651914	0.00044718	0.000724106	0.000297853	0.000685778	0.000680496	0.00139198	0.000532902	0.000619266	0.000338321	0.000969088	0	0.000484625	9.01058e-05	0.000348157	0.000361781	0.000347932	0.00123323	0.000904617	0.000943528	0.000698039	0.000546347	0.000453894	0.00133236	0.000974852	0.000304015	0.000462339	0.000118694	0.00068889	0.000779889	0.00119392	0.000865834	0.000238542	3.62648e-05	0.000206002	0.00164329	0.000613353	0.000474159	0.00116205	0.000575766	0.000631573	0.000752474	0.000775454	0.000570863
TCCCAA	0.000418935	0.000731564	0.000104796	0.000443093	0.000537767	0.000646518	0.000371844	0.000699122	0.000310409	0.000665943	0.00076748	0.00139741	0.000524746	0.000626196	0.00037586	0.00100321	3.23897e-05	0.000415896	9.01058e-05	0.000331459	0.000372819	0.000369278	0.00127126	0.000883181	0.000951617	0.000671107	0.000573597	0.000467621	0.00133236	0.000930491	0.000239373	0.000450551	0.000240493	0.000679366	0.000765723	0.00115992	0.000865504	0.000229911	2.50367e-05	0.000199329	0.00165342	0.000657557	0.000516684	0.00112871	0.000521616	0.000606149	0.000740656	0.000773121	0.000570863
TTCCCA	0.00057756	0.000857334	0.000401851	0.00055897	0.0007836	0.000673179	0.000485062	0.000785034	0.000696933	0.00116633	0.000983789	0.0014718	0.000638091	0.000686063	0.000570444	0.0010681	8.79751e-05	0.000508886	0.000336198	0.000479288	0.00103733	0.000380596	0.0016084	0.000961782	0.00129457	0.000759361	0.00161244	0.000609927	0.00156883	0.00097003	0.000434208	0.000467957	0.000486722	0.000703306	0.00113183	0.00123221	0.00115095	0.000307081	0.000286928	0.000281712	0.00177118	0.000763468	0.000782776	0.00121782	0.000548744	0.000670817	0.00105582	0.000989618	0.000794044
TTTTTT	0.000626154	0.000916195	0.000771219	0.000470045	0.00133576	0.000898728	0.000527552	0.000771689	0.00080659	0.00112259	0.0015686	0.00107003	0.000912697	0.000824855	0.000687594	0.00103124	0	0.00100248	0.000162106	0.000448168	0.000805639	0.000486442	0.00200008	0.00135389	0.00182011	0.000846021	0.00100862	0.00086015	0.00323204	0.00160214	0.00011435	0.000373038	0.000137804	0.000636259	0.00134768	0.00125763	0.00330814	0.000332688	2.66695e-05	0.000246116	0.00278878	0.000875308	0.00194879	0.00183252	0.000559744	0.000786958	0.00322764	0.00198024	0.00355663
ATTTTT	0.000370328	0.000234035	5.08883e-05	2.82839e-05	0.000679692	0.00017834	0.000123846	0.000223509	0.000407252	0.000257812	0.000439195	3.66065e-05	0.00033297	0.000117672	0.000160412	3.49186e-05	0	0.000353132	0.00012396	9.45922e-05	0.000349545	4.4407e-05	0.00107828	0.00045801	0.0010254	0.000367314	0.000652634	0.000325213	0.00146661	0.000236496	4.82163e-05	2.61955e-05	0.000118229	2.5477e-05	0.000582642	0.000152118	0.00192583	0.000100967	1.33348e-05	1.33454e-05	0.00163267	0.000311807	0.00100703	0.000540519	5.44595e-05	0.000221074	0.00188742	0.00116585	0.00171143
CATTTT	0.000335737	0.000284477	0.000103407	3.83914e-05	0.000709202	0.000212952	0.000169539	0.000181601	0.000612423	0.000271589	0.000356501	7.20138e-05	0.000427852	0.000144659	0.000183885	0.000177919	0	0.000375525	0.000195793	0.00012556	0.00102101	0.000114605	0.00115105	0.000529236	0.00117616	0.00043188	0.000590509	0.000364738	0.00214587	0.000291123	4.01949e-05	2.61955e-05	0.00017338	0.000307862	0.000737555	0.000267616	0.0025688	8.7396e-05	2.6987e-05	0	0.00159821	0.000343964	0.00197042	0.000629827	6.54971e-05	0.000251715	0.00224334	0.00127739	0.00184209
TCATTT	0.000382427	0.000302491	5.49829e-05	2.97215e-05	0.000760569	0.000239472	0.000211366	0.00023625	0.000424353	0.00027641	0.000640824	6.20846e-05	0.000427852	0.000253977	0.000192935	0.000177919	2.88654e-05	0.000400833	0.00016371	0.00012556	0.000984191	0.000126305	0.00120223	0.000543474	0.00119697	0.000436818	0.000590509	0.000356928	0.00214587	0.000322805	0.000281451	2.61955e-05	0.00029416	0.000329502	0.000703891	0.000381317	0.00253897	9.24071e-05	2.6987e-05	1.50623e-05	0.00163541	0.000363516	0.00203246	0.00061743	7.03236e-05	0.000285353	0.00246058	0.00131116	0.00184652
GTCATT	0.000447503	0.000516083	0.000248217	0.000113507	0.00106249	0.000453367	0.000330851	0.000481069	0.000487578	0.000462484	0.00094045	0.000141744	0.000592267	0.000498737	0.000477533	0.000177919	0	0.000608096	0.000329568	0.000183958	0.00112892	0.000801919	0.00144522	0.000646226	0.00162569	0.000570329	0.000971554	0.000760352	0.00228637	0.000515569	0.000514204	5.02378e-05	0.00029416	0.000467144	0.000899319	0.000690077	0.00303141	0.000166978	2.6987e-05	2.83733e-05	0.00169114	0.000604639	0.00249731	0.000687557	0.000135074	0.000497	0.00253622	0.00158484	0.00196557
TGGTAC	0.000491052	0.00101938	0.000324913	0.000667277	0.0012467	0.00455471	0.000293764	0.00089156	0.000775713	0.00155512	0.000899544	0.00243077	0.000591452	0.00337105	0.000199088	0.00160434	2.96331e-05	0.00200309	0.000433984	0.001589	0.000554977	0.00427939	0.00144526	0.00305446	0.00123935	0.00183467	0.00126741	0.000826228	0.00114885	0.00438143	0.000694177	0.000317226	0.000302223	0.00477006	0.00108054	0.00225657	0.00106324	0.000929516	0.000195888	0.00163605	0.00179197	0.000532576	0.000976471	0.00370437	0.00106921	0.000599696	0.000692685	0.00091125	0.00080144
TTGGTA	0.000317772	0.000224148	7.55918e-05	2.83282e-05	0.000487359	0.00019608	0.000123304	0.000168224	0.000353152	0.000269877	0.000871814	4.90831e-05	0.000237798	0.000110576	0.000152454	0.00010496	5.74348e-05	0.000180473	0.000121859	8.51576e-05	0.000349545	7.05994e-05	0.00108315	0.000317185	0.000917848	0.000312845	0.000567825	0.00116224	0.000963836	8.35382e-05	0.000275774	3.777e-05	0.000103352	2.49104e-05	0.000586156	0.000152118	0.000751028	8.23842e-05	2.54701e-05	2.00213e-05	0.00166141	0.000428104	0.000303889	0.000318803	9.949e-05	0.000241716	0.000644102	0.000655602	0.000688331
TGTTGG	0.000325044	0.000223616	5.16334e-05	7.2128e-05	0.000509406	0.000250537	0.000121443	0.000197311	0.000320686	0.000232578	0.000639429	8.4214e-05	0.000229298	0.000154484	0.000199307	0.000136738	2.88654e-05	0.000272953	0.000269617	0.000132589	0.0005195	0.000111634	0.00116796	0.000320774	0.000940784	0.000339056	0.000638446	0.000342587	0.00105491	0.000117237	0.000373836	6.6875e-05	0.000152826	9.12848e-05	0.000650559	0.000152118	0.000757732	0.000133067	0.000203727	1.30774e-05	0.00164369	0.000437755	0.000413992	0.000330985	0.000117893	0.000279935	0.000670728	0.000676817	0.000652652
ACTTCT	0.000523449	0.00102436	0.000684706	0.000775922	0.00137815	0.000516386	0.000473385	0.00111155	0.00106677	0.00103261	0.00103414	0.00040606	0.00053075	0.000617422	0.00101857	0.000789741	0.000240204	0.00243518	0.000509864	0.000953727	0.00151287	0.000706054	0.00227365	0.00105544	0.00170924	0.00101616	0.00100183	0.00108198	0.00299356	0.000672359	0.0005756	8.10059e-05	0.000455486	0.000686411	0.00117608	0.000824396	0.00287681	0.00140222	0.00133248	0.000343373	0.00259451	0.0018675	0.00180613	0.000553172	0.000511163	0.000889534	0.00140716	0.00176281	0.000921886
CACTTC	0.000790871	0.000515879	0.000448124	0.000131663	0.0011911	0.000226167	0.000252063	0.000193371	0.0010394	0.000308734	0.000971016	6.70619e-05	0.00031944	0.00022649	0.00024415	0.000175002	0.000328774	0.000212997	0.000695797	0.000148102	0.00058285	5.60049e-05	0.00186226	0.000480156	0.00140495	0.000446325	0.00110511	0.00040167	0.00151777	0.000247285	0.00029464	3.84488e-05	0.000246757	2.54284e-05	0.000677442	0.000152118	0.00124629	0.000112922	2.52805e-05	1.99152e-05	0.00178049	0.000398517	0.00131938	0.000383618	6.94338e-05	0.000368049	0.000928408	0.00130382	0.000724747
GCAATA	0.00190429	0.00186174	0.00529469	0.00113877	0.00231301	0.00270349	0.00299096	0.00282288	0.00201912	0.0024681	0.00201163	0.00123712	0.00407391	0.00284843	0.0023358	0.00154864	0.00317367	0.00216396	0.00118532	0.00177529	0.00159336	0.00162017	0.000857644	0.00102899	0.00193169	0.00189864	0.000738561	0.00256441	0.00125771	0.000936148	0.00327402	0.0025453	0.00244072	0.00153439	0.00111051	0.0022922	0.00153332	0.00234249	0.00100376	0.00265724	0.00134902	0.00185488	0.00107336	0.000971886	0.00123158	0.00224308	0.00143984	0.00175977	0.00114877
TGCAAT	0.00113875	0.000798648	0.00491217	0.000681427	0.00138793	0.00222905	0.00263217	0.00166678	0.00133641	0.00150645	0.00215349	0.000818081	0.00334517	0.00180441	0.00100482	0.00117353	0.00074982	0.00104104	0.000383408	0.00086804	0.00158015	0.00129746	0.000406395	0.000826729	0.000953375	0.00101214	0.00066418	0.00154611	0.000712452	0.000651301	0.00276613	0.00127969	0.00219306	0.00147664	0.000965172	0.00212398	0.00117294	0.0012891	0.00061239	0.00148821	0.000105251	0.000964799	0.00095529	0.000894941	0.000733028	0.00139704	0.00121721	0.000856913	0.00121455
GTGCAA	0.00114602	0.000733287	0.00499092	0.000590328	0.00139639	0.00182889	0.00263217	0.00129825	0.00134682	0.00140478	0.00172716	0.000393118	0.00354722	0.00159523	0.000747748	0.00113977	0.00074982	0.0005773	0.000383408	0.00084352	0.00111956	0.000748356	0.000335624	0.000398406	0.000919406	0.000810682	0.000319863	0.00149473	0.000528621	0.000537887	0.00275796	0.00125678	0.0021778	0.000956227	0.000840954	0.00139882	0.000717648	0.0011675	0.00061239	0.00148236	9.12122e-05	0.00105051	0.000802879	0.000748232	0.000660573	0.00132683	0.0009752	0.000663036	0.00110572
TTGTGC	0.00113787	0.000799199	0.00494262	0.000617484	0.00137371	0.00186399	0.00261492	0.00128244	0.00140241	0.00150482	0.00172783	0.000398611	0.00349905	0.00165999	0.000710641	0.00117089	0.00074982	0.000604124	0.000383408	0.000814998	0.00112431	0.00108343	0.000335014	0.000405084	0.00105222	0.000901646	0.000424766	0.00154489	0.000844008	0.000849566	0.002758	0.00129145	0.00224631	0.00122346	0.000844626	0.00139882	0.000606775	0.00120686	0.00061239	0.00150222	9.12122e-05	0.00105592	0.000750077	0.000801399	0.000677795	0.00136065	0.000905326	0.000680515	0.00106853
ATTGTG	0.00115479	0.000951994	0.00514339	0.000644079	0.00147035	0.00167074	0.00297022	0.00180512	0.00154724	0.00150898	0.00182168	0.000627776	0.00368013	0.00161624	0.000905218	0.00110963	0.000778686	0.000651027	0.00114247	0.000944113	0.00119915	0.000664421	0.000334811	0.000422273	0.00101362	0.00117062	0.000335236	0.00162499	0.000528621	0.000436208	0.00279589	0.00137932	0.00250036	0.000357651	0.00101086	0.00143246	0.000999767	0.00129018	0.000665499	0.00144925	9.9519e-05	0.00135013	0.000751051	0.000932714	0.000856535	0.00152197	0.0009752	0.00100901	0.00102799
TCCGCC	0.00045959	2.9342e-05	7.68886e-05	8.99745e-05	0.000531383	1.80178e-05	7.56329e-05	5.49927e-05	2.20049e-05	6.24624e-05	4.26572e-05	0.000113994	2.52534e-05	7.41264e-05	0.000241374	0	0	5.49299e-05	1.58768e-05	0	0.000546373	0.000129346	0.000104334	7.61808e-05	5.06815e-05	5.33411e-05	0.000145654	1.69711e-05	0.000227223	5.28061e-05	4.67215e-05	1.16047e-05	0	0.000219577	2.70666e-05	0.000137265	0.00047899	1.33594e-05	0	0.000123197	4.18478e-05	1.70315e-05	0.000136681	3.29929e-05	1.80191e-05	2.55364e-05	0.000492357	9.09066e-05	0.000186183
GCTTCC	0.000551686	9.05369e-05	7.531e-05	0.000107634	0.000707331	0.000147225	0.000154929	0.000183753	9.61564e-05	0.000152739	0.000272417	0.000133686	0.000328401	0.000252463	0.000589047	0	0	0.000196684	4.94039e-05	8.47802e-06	0.00132355	0.000184162	0.000234762	0.000125492	0.000231884	6.91748e-05	0.000384096	8.6636e-05	0.000338927	0.00015507	0.000243672	2.91356e-05	4.83613e-05	0.000314992	5.21071e-05	0.000255517	0.00118154	6.86138e-05	1.21999e-05	0.000132698	3.38891e-05	0.000122743	0.000604223	1.121e-05	1.87045e-05	7.33013e-05	0.00105073	0.000288914	0.000540233
GGCTTC	0.000746746	0.000217686	0.00268458	0.000163481	0.00107772	0.000377238	0.000498756	0.000313807	0.00041643	0.000338631	0.00111556	0.000202793	0.000930234	0.00052045	0.00095164	0.000143	9.23394e-05	0.000386076	0.000388982	0.00010432	0.00162562	0.000377103	0.000589046	0.000316289	0.00122122	0.000262942	0.000740254	0.000279766	0.00138424	0.000323973	0.000623799	3.087e-05	0.000133068	0.000748489	0.000407876	0.000675398	0.00201166	0.000147535	7.60914e-05	0.000132521	0.000153535	0.000293001	0.00194799	0.000283628	0.000144402	0.000259897	0.00159853	0.000540985	0.00121821
GCATCA	0.00119549	0.000958813	0.0049168	0.000709124	0.00144578	0.00210118	0.00259227	0.00170511	0.00132512	0.00149428	0.00202213	0.000591187	0.00349036	0.00171475	0.000773771	0.00110963	0.00074982	0.000789433	0.000383408	0.000823109	0.00119076	0.00090202	0.000355103	0.000553106	0.000968965	0.000979053	0.000379959	0.00160186	0.000663555	0.000525848	0.00282303	0.00126827	0.00221514	0.000773648	0.000848384	0.00188238	0.000966044	0.00123518	0.00058856	0.00130852	9.12122e-05	0.00108004	0.000597969	0.000816064	0.000670093	0.00136396	0.000974396	0.000992135	0.00102857
TGCATC	0.00115321	0.000844502	0.00494262	0.000574235	0.00136771	0.00209529	0.00261492	0.00173262	0.00135918	0.00160143	0.0017495	0.000547136	0.00349036	0.00171445	0.000701787	0.00110963	0.000720499	0.000770995	0.000383408	0.000832311	0.00111133	0.000927598	0.000355103	0.000587928	0.000911208	0.000938764	0.000319863	0.0016148	0.000528621	0.000498023	0.00281578	0.00125676	0.00221514	0.000778096	0.000848384	0.00188238	0.000848922	0.00125373	0.00058856	0.00134392	9.12122e-05	0.00108574	0.000584579	0.000849754	0.000674376	0.00139846	0.000891969	0.000747956	0.00102857
CTGCAT	0.00131331	0.00128313	0.00548785	0.00145812	0.00167038	0.0017861	0.00303135	0.00211144	0.00168773	0.00200226	0.00202971	0.00080008	0.00367409	0.00165217	0.00137821	0.00162014	0.000927933	0.00261315	0.000562519	0.00160196	0.00190871	0.00112677	0.00101724	0.000844064	0.00114005	0.00123895	0.000335277	0.00171751	0.000713391	0.000675683	0.00280581	0.00129222	0.00221514	0.000693317	0.00108293	0.00150226	0.00139692	0.00229065	0.00175689	0.00160297	0.000693681	0.00235697	0.000625531	0.000803639	0.000975633	0.00178669	0.00104819	0.00118948	0.00106576
GCTGCA	0.00115321	0.000691764	0.00491576	0.000565242	0.00137896	0.00169017	0.00267253	0.00128221	0.00133647	0.00132183	0.00172783	0.000388173	0.00349962	0.00148432	0.000701787	0.00107785	0.000720499	0.000572696	0.000399449	0.000806597	0.000465724	0.000647448	0.000362352	0.000376455	0.00091973	0.000786979	0.000312257	0.00149514	0.000528621	0.000406921	0.00280581	0.00126818	0.00223217	0.000311817	0.000848384	0.00139882	0.000387314	0.00115535	0.00058856	0.00133949	9.12122e-05	0.00107954	0.000541023	0.000692872	0.000633436	0.00130341	0.000606483	0.000596746	0.00085955
TCGCTG	0.00113795	0.000739631	0.00488828	0.000573455	0.00143769	0.00165118	0.00269558	0.00117459	0.00133173	0.00112033	0.0014463	0.000369875	0.00359436	0.00136352	0.000746005	0.00125498	0.000778545	0.000422306	0.000472971	0.000874731	0.000566184	0.000652465	0.000595208	0.00043442	0.00123214	0.000757906	0.000406572	0.000403236	0.00120183	0.000364946	0.00276791	5.00466e-05	0.00195823	0.000504321	0.00103407	0.00136242	0.000960684	0.00108908	0.000574357	0.00130954	0.000137714	0.000883478	0.00144754	0.000837945	0.000616956	0.00115556	0.00072702	0.000592923	0.0009428
ACGTCG	0.00085335	1.89066e-05	2.44654e-05	8.66983e-06	0.000125163	6.42378e-06	0.000171436	2.00495e-05	0	2.74117e-05	0	1.70079e-05	5.0578e-05	0	9.05039e-06	6.19176e-05	0	8.66813e-05	9.60007e-05	1.69565e-05	6.16479e-05	7.05593e-06	6.42508e-05	1.00937e-05	6.68057e-05	0.000155732	0	8.28742e-06	0	0.000115073	0	2.33397e-05	0	0.00011906	7.54507e-05	0	5.61166e-05	1.75427e-05	0	6.57056e-06	8.13723e-06	6.23815e-06	6.10234e-05	6.54946e-05	4.42838e-06	8.45533e-06	1.1517e-05	2.38893e-05	3.60464e-05
GACGTC	0.000423115	0	0	0	3.37602e-05	0	5.64993e-05	4.81748e-06	0	4.27699e-06	0	0	8.28418e-06	0	0	0	0	4.78758e-06	0	0	2.54166e-05	3.68745e-06	3.21254e-05	0	2.52513e-05	0	0	0	0	0	0	5.77227e-06	0	0	1.70153e-05	3.47246e-05	0	0	0	0	0	0	6.67735e-06	0	0	0	0	0	0
CGCGAC	0.000612444	0.000676348	0.000572084	0.000790653	0.00063422	7.24481e-05	0.000440311	0.000809612	0.000669096	0.000693002	0.000346783	0.000301941	0.000142858	0.000108192	0.000752041	0.000542286	0.000207434	0.00209523	0.000244213	0.000778091	0.000959833	0.000468407	0.000772919	0.000536331	0.000389627	0.000392114	7.68261e-05	0.00032076	0.00111083	0.000316863	0.000211556	5.30237e-05	0.000266522	0.000271283	0.000352811	0.000172517	0.00134371	0.00125534	0.00125366	0.000321636	0.000695305	0.00129561	0.000391195	6.72007e-05	0.000370887	0.000513467	0.000612563	0.000950103	0.000222031
ACGCGA	0.000612444	0.000703057	0.000677044	0.000790886	0.000613895	7.24481e-05	0.000381873	0.000831214	0.000635443	0.000692984	0.000367779	0.000301941	0.000142858	0.000108192	0.00074275	0.000542286	0.000207434	0.0020814	0.000244213	0.000778091	0.000959833	0.000461886	0.000766329	0.000536331	0.0003898	0.000402076	8.43526e-05	0.000576744	0.00111083	0.00035367	0.000211556	4.14791e-05	0.000327832	0.000271283	0.000328109	0.000172517	0.00130895	0.0012603	0.00126496	0.000321636	0.000706762	0.0014043	0.000402275	7.93827e-05	0.000384218	0.000509285	0.000588611	0.000950103	0.000222031
CCTCAC	0.00211675	0.00311337	0.00337214	0.00284831	0.00363842	0.0070055	0.00425429	0.00403666	0.00302777	0.00444272	0.00253082	0.00564967	0.00398655	0.00572643	0.00255927	0.00465699	0.00145933	0.00518016	0.00158108	0.00359611	0.00269017	0.00596908	0.0027386	0.00498853	0.00147782	0.00329105	0.00218357	0.00241668	0.00272826	0.00586271	0.0032393	0.000968484	0.0041281	0.00675399	0.00257727	0.00526657	0.00381183	0.00370237	0.00202039	0.00385444	0.00188553	0.00348044	0.0024626	0.00518772	0.00263208	0.00264333	0.00233211	0.00308181	0.00258359
CCCTCA	0.00100236	0.000631443	0.00227603	0.000572153	0.00124162	0.00145269	0.00239031	0.00108384	0.00102879	0.00103614	0.000798385	0.000428008	0.00304487	0.00119069	0.000520778	0.00107785	0.000719124	0.000385531	0.000315458	0.000857323	0.000428669	0.000505433	0.000411834	0.000344073	0.00028902	0.000691805	0.00013413	0.000324754	4.62535e-05	0.000272014	0.00231312	4.23872e-05	0.00188785	0.000120504	0.000815398	0.000976359	0.000316029	0.00107676	0.000534611	0.00133497	7.65847e-05	0.000819449	0.000179929	0.000647279	0.000515269	0.000975039	0.000166276	0.000403876	0.000339213
TCCCTC	0.000936522	0.000659291	0.00222247	0.000588912	0.00104472	0.0014659	0.00227123	0.00104787	0.000947863	0.0010503	0.000688799	0.000555114	0.00281543	0.00112543	0.000446438	0.00125409	0.000773094	0.000381063	0.000331416	0.000797395	0.000209181	0.00048979	0.000319912	0.000416367	0.000297235	0.000632258	0.000126527	0.000328432	0.000419681	0.000224534	0.00207289	4.81894e-05	0.00183861	0.000201368	0.000776405	0.00104405	0.000225347	0.00107191	0.000510965	0.00132809	4.33003e-05	0.000821205	0.000158321	0.000613567	0.000519698	0.00101996	0.000154641	0.00040108	0.000339213
ATCCCT	0.000943081	0.000808098	0.00222247	0.000517609	0.00101557	0.00141559	0.002309	0.00113538	0.000981573	0.00103799	0.000450462	0.000752661	0.00284073	0.00112905	0.000453902	0.00107785	0.000628615	0.000268995	0.000364861	0.000890679	0.000209181	0.000522786	0.000272331	0.000248429	0.000272067	0.000565028	5.80192e-05	0.000344678	4.62535e-05	0.000194738	0.00210918	8.37146e-05	0.00186994	0.000466417	0.00068327	0.000976359	0.000189865	0.00108091	0.000558379	0.00138222	7.72786e-05	0.00108113	0.000152243	0.000556401	0.000524316	0.00103928	0.000166842	0.000567918	0.000339412
CATCCC	0.00116749	0.000839781	0.00483447	0.000574187	0.00141545	0.00144293	0.00266941	0.00119805	0.00128958	0.0011098	0.00149456	0.000430186	0.00349612	0.00121784	0.000713021	0.00111198	0.000720955	0.000303151	0.000432812	0.000893079	0.000402218	0.000509916	0.000311661	0.000260149	0.000912145	0.000663193	0.000302556	0.000303438	0.000367836	0.000297105	0.00258011	6.67782e-05	0.00217381	0.000262246	0.000857276	0.000976359	0.000350669	0.00107377	0.000635974	0.00132956	7.72333e-05	0.000877797	0.000412604	0.000713442	0.000539547	0.0010383	0.000566253	0.000585648	0.000934142
CCATCC	0.000923001	7.44734e-05	0.00110087	0.00011983	0.000933836	0.000102443	0.00149844	8.9685e-05	0.000847261	0.000208792	0.000429357	0.000165186	0.00211771	0.000156285	0.000417213	0.000128129	0.000564023	0.000202759	0.000132008	3.46317e-05	0.000196462	1.81727e-05	0.000263561	0.000178354	0.00026136	0.000240743	7.60572e-06	0.000290693	4.62535e-05	0.000153442	0.00181734	2.35475e-05	0.000812172	8.09041e-05	0.000385808	0.000385565	0.000190177	4.94082e-05	0.000376482	0.000170971	5.94771e-05	0.00024512	0.00013651	6.72163e-05	0.000141623	4.72495e-05	0.000154269	0.000184402	0.00025786
TCCATC	0.000917141	5.42098e-05	0.000945886	0.000137863	0.000915675	0.000108459	0.0017787	7.58901e-05	0.000991501	0.000241509	0.000450023	0.000207121	0.00215052	0.000174324	0.000401374	0.000128129	0.000564023	0.000209277	0.000280544	4.40272e-05	0.000271306	1.82867e-05	0.000218118	0.000185031	0.000289818	0.000288689	1.53335e-05	0.000286573	0	6.34536e-05	0.00178058	4.18779e-05	0.000782785	8.09038e-05	0.000372088	0.000275956	0.000347883	5.02721e-05	0.000352459	0.000164298	1.71046e-05	0.000187194	0.000221588	4.5083e-05	0.000146736	5.23668e-05	0.000236897	0.000234996	0.000266518
CTCCAT	0.000909358	7.54013e-05	0.00102059	6.72567e-05	0.000901032	6.50664e-05	0.00181837	9.60468e-05	0.00105391	0.00017583	0.000474269	5.44715e-05	0.00214236	0.000130533	0.000442135	0.00024648	0.000564023	0.000178541	0.000280544	4.51675e-05	0.000980872	2.80369e-05	0.000320599	0.00028275	0.000289598	0.000302375	3.26399e-05	8.23245e-05	0.000257891	0.000172201	0.00187302	5.98089e-05	0.000767282	4.39569e-05	0.000362054	0	0.000521032	2.37265e-05	0.000364221	6.96124e-06	0.000165704	0.000185807	0.000301145	0.000195411	8.09225e-05	9.6607e-05	0.000509629	0.000233618	0.000435535
CCTCCA	0.000895065	0.000118716	0.000955517	9.72676e-05	0.0010147	0.000124554	0.00154027	9.83633e-05	0.000984154	0.00014946	0.000480338	3.64019e-05	0.00217509	0.000263029	0.000423944	0.00024648	0.000533909	0.000198791	8.2604e-05	5.59002e-05	0.000918698	0.000137495	0.000533133	0.00028664	0.000496101	0.000272346	0.00020448	0.000368017	0.000308743	0.000253759	0.00197776	2.96896e-05	0.000871549	9.11872e-05	0.00054985	0.000146662	0.000478939	5.47198e-05	0.000364221	2.94249e-05	0.000194016	0.000235627	0.000414872	0.000242279	8.08923e-05	0.000155824	0.000479825	0.000236558	0.000518538
GGCCTC	0.000898834	9.62732e-06	0.000844112	6.71961e-05	0.000876164	4.90519e-05	0.00149785	2.4645e-05	0.00081373	3.61336e-05	0.000513374	1.70654e-05	0.00225395	5.91444e-05	0.000380595	0	0.000533909	8.77893e-05	8.2604e-05	8.65651e-06	0.000207443	3.53694e-06	0.000225305	9.12632e-05	0.000252526	0.000165195	7.60572e-06	2.97332e-05	0	1.90626e-05	0.00178104	2.94404e-05	0.000903758	9.4736e-06	0.000365408	0	0.000149628	2.25626e-05	0.000388561	2.0208e-05	9.12237e-05	7.92547e-05	8.84071e-05	3.36988e-05	9.44613e-06	2.16093e-05	0.000259414	0.000120738	0.000183268
TCAACC	0.000886003	3.85119e-05	0.000792377	8.94506e-06	0.000848127	1.17217e-05	0.00138289	2.93597e-05	0.00077793	9.98465e-05	0.000603153	7.77937e-05	0.00232227	1.33681e-05	0.000275761	0	0.000473515	9.97261e-05	0.000130645	3.4135e-05	2.21327e-05	0	5.20595e-05	4.45847e-05	0.000260916	0.000106531	1.50932e-05	0.00011303	0	1.42113e-05	0.00183549	0.000940295	0.000765252	4.762e-06	0.000353964	0	0.000112923	3.48172e-05	0.000364659	0	8.48349e-06	3.40072e-05	7.52427e-05	2.31016e-05	8.87971e-06	0.0003456	0.000212873	0.000181579	0.000183454
CTCAAC	5.91264e-05	0.000119403	0	0	0.000110006	6.46028e-06	0	8.29526e-05	1.14757e-05	2.317e-05	0.000173796	5.57936e-06	0.000238706	1.36173e-05	0	0	0	0	0	8.34892e-06	1.14509e-05	3.59192e-06	6.25526e-06	3.35725e-06	4.9548e-05	5.2934e-05	0	4.16507e-06	0	1.42603e-05	0.000166253	5.80218e-06	1.60082e-05	9.15868e-06	1.38849e-05	0	9.78117e-06	0	1.19457e-05	0	0	0	2.74776e-05	4.4985e-05	4.40567e-06	4.2929e-06	0	5.89795e-06	0
TCTCAA	7.15735e-06	0	4.8299e-05	0	0	0	0	9.81433e-06	0	3.79445e-06	0	0	0	0	1.80075e-05	0	0	0	0	0	0	0	0	3.35725e-06	8.08947e-06	0	0	0	0	4.60681e-06	0	0	0	0	0	0	7.25261e-05	0	0	0	0	0	1.31157e-05	1.08076e-05	0	4.2929e-06	6.98748e-05	5.86755e-06	0
GTTCTC	2.13237e-05	6.68673e-05	2.48558e-05	0	3.94227e-05	5.86087e-06	0	1.5044e-05	1.12935e-05	2.42651e-05	0	1.70942e-05	8.15607e-06	6.65848e-06	6.45126e-05	0	0	4.4899e-06	0	0	1.139e-05	0	6.35199e-06	1.02665e-05	8.21456e-06	1.32547e-05	0	3.77124e-05	0	9.33272e-06	8.89498e-06	3.46635e-05	0	0	4.01373e-05	0	2.53397e-05	3.53267e-05	0	6.67269e-06	8.26371e-06	0	0	2.20733e-05	0	2.09113e-05	8.15709e-05	1.4777e-05	0
GGTTCT	2.13237e-05	5.22367e-05	0	5.22424e-05	0	0.000217105	0	2.95969e-05	2.2356e-05	0.000160624	2.09965e-05	2.24115e-05	2.44687e-05	0.000196816	0	9.30368e-05	0	3.13141e-05	0	0	0	0.000436015	6.55471e-06	5.75278e-05	8.21456e-06	7.38214e-05	0	3.32388e-05	4.62535e-05	0.000452052	9.03469e-06	2.30894e-05	0	0.00094572	2.01413e-05	6.90799e-05	9.90741e-05	8.63062e-06	0	6.64192e-05	0	3.93696e-05	0.000199066	0.000108527	3.98784e-05	6.26698e-05	2.58774e-05	5.37315e-05	7.58216e-05
AGGTTC	0.000738532	1.86821e-05	0.000817101	3.8605e-05	0.000533546	1.7613e-05	0.00130739	1.95005e-05	0.000438505	3.14017e-05	0.00034269	3.37511e-05	0.00182133	2.70319e-05	0.000239224	0	0.000146461	4.11437e-05	7.96362e-05	8.65651e-06	1.10378e-05	2.20677e-05	6.53028e-05	4.44245e-05	0.000234562	0.000114816	7.60572e-06	4.60407e-05	0	0	0.00167832	4.63907e-05	0.000466572	9.54946e-06	0.000256556	0	0.000189822	3.91584e-05	0.000168944	6.85016e-06	1.64422e-05	3.38367e-05	0.000126435	1.1092e-05	8.85677e-06	4.21084e-05	0.000250021	6.81137e-05	0.000223228
GAGGTT	0.000913771	0.000585821	0.00230319	0.000498719	0.00104584	0.00137329	0.00231264	0.00106996	0.000971162	0.00101182	0.000603153	0.000326163	0.00303765	0.00106834	0.00039754	0.00107785	0.000628615	0.000236671	0.000315458	0.000807332	0.000311212	0.000476527	0.000233005	0.000224441	0.000272067	0.00054193	5.80192e-05	0.000190425	0	0.000184799	0.00211962	6.5323e-05	0.00185583	2.58447e-05	0.000683066	0.00093904	0.000115179	0.00100611	0.000522594	0.00128716	3.45983e-05	0.000733292	9.73733e-05	0.000545467	0.000510818	0.000949943	0.000154269	0.000303746	0.000264819
AGAGGT	0.000906796	0.000581142	0.00235162	0.000498719	0.00104027	0.00137329	0.00233147	0.00107987	0.000971162	0.00100409	0.000603153	0.000296892	0.00303765	0.00105731	0.00037081	0.00107785	0.000628615	0.000214338	0.000315458	0.000807332	0.000311212	0.000472473	0.000226519	0.000227833	0.000263545	0.000528449	5.80192e-05	0.000182159	9.25069e-05	0.000189477	0.00208324	3.07212e-05	0.00185583	2.58447e-05	0.000669223	0.00093904	0.000163759	0.000996372	0.000510649	0.00130205	2.63772e-05	0.000783417	0.000157127	0.000545467	0.00050648	0.000954633	0.000154269	0.000300688	0.000264819
AAGAGG	0.000920873	0.000371283	0.000967137	0.000434405	0.000953186	0.000128698	0.00159352	0.000414794	0.000825027	0.000176901	0.000730728	0.00111551	0.00255002	0.000184149	0.00058555	0.000703717	0.00082397	0.000197542	0.00026442	0.000118533	0.000231877	7.75992e-05	0.000289069	0.000454536	0.00033606	0.000378747	3.00718e-05	0.000114911	0.000553843	0.000115729	0.00180047	0.000404814	0.000765252	0.000176682	0.000416931	3.45399e-05	0.000381077	0.000155382	0.000364659	4.03602e-05	5.93476e-05	0.000426089	0.000123891	0.000618969	0.000398067	0.000107479	0.000250522	0.00028088	0.000220073
AAAGAG	0.000978464	0.000357389	0.000892068	0.000613861	0.00105369	0.000152288	0.0017603	0.000504634	0.000869266	0.000223928	0.000689037	0.00122435	0.00267429	0.000211703	0.000611606	0.000797266	0.000593039	0.000234281	8.20066e-05	8.76557e-05	0.000230464	8.11541e-05	0.000347787	0.000518951	0.000295016	0.00038311	0.000239845	0.000131933	0.00064635	0.000115803	0.00210731	0.000364168	0.000765252	0.000310561	0.000477876	0.00010183	0.000428306	0.000102327	0.000376421	2.02722e-05	5.95225e-05	0.000381577	0.000128684	0.000605914	0.000425254	0.00013758	0.000262403	0.000308697	0.0003683
GAAAGA	0.00156771	0.0012405	0.00106304	0.000744125	0.00173778	0.000538161	0.00194989	0.00133273	0.00162528	0.00120349	0.00126568	0.000745315	0.0030115	0.0011664	0.00194687	0.000374408	0.00295823	0.00139485	0.000963471	0.000930156	0.000797313	0.000306992	0.000795436	0.000449259	0.00119942	0.00124981	0.000520618	0.00208927	0.000450552	0.000352252	0.00232247	0.00251922	0.00102505	0.000416788	0.000470739	0.000268987	0.000716928	0.00124154	0.000815389	0.00153758	0.00127014	0.00108499	0.000619138	0.000208732	0.00061029	0.00098638	0.000663589	0.00154915	0.000261121
GCGAAA	0.00169738	0.000557357	0.00496976	0.000509959	0.00201123	0.000244642	0.00331234	0.000786428	0.00196916	0.000477859	0.000660552	0.00038287	0.0034266	0.000640983	0.00118635	6.19192e-05	0.00202352	0.00043717	0.0019595	0.000289012	0.000936116	0.000132729	0.000778129	0.000364545	0.000690336	0.000934954	0.000319533	0.000798946	0.0002708	0.00041613	0.00303761	0.000176847	0.00381521	0.000334748	0.00112637	0.00118944	0.000751874	0.00032588	0.000854854	0.000111978	0.000278026	0.000904348	0.000635815	0.000693144	0.000485855	0.000665936	0.00131524	0.00095003	0.00143333
TGGCGA	0.000819526	9.38081e-06	0.000841567	1.79377e-05	0.000698968	1.23767e-05	0.0013827	1.51824e-05	0.000744334	3.46396e-05	0.000429357	1.11885e-05	0.00205922	9.95241e-06	0.000302776	3.09588e-05	0.000473515	4.57286e-05	8.2604e-05	8.65651e-06	1.08148e-05	7.05593e-06	6.48625e-05	3.10069e-05	0.000227318	0.000128511	7.60572e-06	1.70136e-05	0	2.39209e-05	0.00170575	2.9202e-05	0.000764585	9.32785e-06	0.000340206	0	8.45471e-05	2.59878e-05	0.000364659	0	1.66207e-05	2.83619e-05	6.09824e-05	2.11813e-05	4.42838e-06	3.478e-05	0.000165786	0.000105279	0.000183268
CTGGCG	0.000891192	1.41562e-05	0.000864473	3.53667e-05	0.000749201	1.89804e-05	0.0013827	3.54076e-05	0.000777342	3.44755e-05	0.000471459	5.63809e-06	0.00206031	1.73497e-05	0.000329741	0.000124159	0.000443723	5.02419e-05	0.000132501	8.65651e-06	1.08148e-05	3.24119e-05	9.64962e-05	3.78437e-05	0.000279141	0.000110767	4.01541e-05	2.11787e-05	0	9.43534e-06	0.00181267	3.50332e-05	0.00077969	9.32785e-06	0.000366834	3.36451e-05	8.48476e-05	3.90715e-05	0.000376482	4.00427e-05	3.31481e-05	3.37267e-05	5.43396e-05	3.2332e-05	3.99702e-05	3.89623e-05	0.000177362	0.000102235	0.000219314
ACTGGC	0.000819939	0	0.000817101	1.78901e-05	0.000704561	0	0.0013827	9.86425e-06	0.000733332	1.94123e-05	0.000429357	2.23227e-05	0.00201693	6.76306e-06	0.000257756	0	0.000414247	5.02185e-05	8.2604e-05	4.36509e-05	0	1.10624e-05	0.000117435	3.12139e-05	0.000253101	0.000110995	2.25099e-05	2.12668e-05	0	1.43098e-05	0.00169672	1.77753e-05	0.000749244	9.57492e-06	0.000330047	0	6.95534e-05	1.76727e-05	0.000376482	2.01955e-05	1.66624e-05	2.28595e-05	6.78018e-05	0	0	1.71267e-05	0.000178283	8.73032e-05	0.000183268
CACTGG	0.000827059	0	0.000817101	1.78901e-05	0.000721296	0	0.00140153	9.86425e-06	0.000733332	1.94123e-05	0.000429357	5.55045e-06	0.0020332	3.38153e-06	0.000257756	0	0.000414247	5.02185e-05	8.2604e-05	8.65651e-06	1.1095e-05	3.55508e-06	7.14194e-05	5.98025e-05	0.000210718	0.000106531	2.25099e-05	1.70136e-05	0	0	0.00167878	1.77753e-05	0.000749244	4.59105e-06	0.000326748	0	6.95534e-05	8.83563e-06	0.000376482	1.33454e-05	8.48349e-06	2.28595e-05	7.45852e-05	0	0	1.71267e-05	0.000154269	8.43542e-05	0.000183268
TCACTG	0.00160565	0.00250698	0.00188604	0.00227669	0.00320133	0.0055032	0.00290951	0.00286886	0.00256765	0.00333971	0.00229293	0.00523503	0.00339262	0.00451175	0.0022402	0.00361108	0.00115445	0.00471554	0.00120343	0.00277283	0.00292995	0.00539771	0.00240659	0.00467647	0.00139974	0.00270817	0.00207954	0.00210268	0.00295953	0.00558123	0.00273399	0.000804797	0.00302202	0.00668745	0.00210077	0.00421747	0.00371949	0.00266851	0.00149945	0.00247288	0.00185997	0.00266999	0.00243608	0.00450748	0.0021581	0.00164399	0.00257737	0.00280173	0.00259666
TCCTCA	0.00119526	0.00280192	0.00109611	0.00230353	0.00257507	0.0055827	0.00190135	0.00317173	0.00201045	0.00355289	0.00190557	0.00534383	0.00156475	0.00462153	0.00206534	0.00357914	0.000740205	0.00484	0.00141016	0.00287542	0.00237265	0.00551721	0.00237167	0.00471681	0.00123026	0.0028442	0.00210915	0.00225841	0.00268201	0.0056285	0.0011293	0.00096109	0.00228999	0.00673572	0.00179591	0.00429021	0.00354912	0.00267817	0.00153332	0.00255283	0.00180894	0.00265552	0.00233708	0.00459669	0.00218799	0.00188948	0.00217753	0.0028342	0.00224437
TTCCTC	0.00201094	0.00371003	0.00151152	0.0028564	0.00353255	0.00612531	0.002225	0.00426198	0.00327307	0.0046735	0.00286946	0.00584589	0.00207266	0.00574075	0.00386929	0.00405843	0.00319292	0.00615858	0.00212144	0.00368094	0.00438019	0.00575011	0.0028654	0.00498228	0.00255851	0.00375016	0.00275227	0.00440309	0.00383942	0.00618301	0.0017217	0.00321953	0.00246011	0.00699065	0.0018784	0.00457213	0.00513338	0.00385648	0.00200831	0.00409256	0.00307752	0.00384704	0.00377467	0.00480678	0.00273826	0.00284296	0.00340633	0.00449735	0.00280406
CTTCCT	0.00165849	0.00167936	0.00066673	0.000772654	0.00187439	0.00109807	0.000739446	0.00187745	0.00223274	0.00190284	0.00168225	0.00166444	0.00113938	0.00168584	0.00230374	0.000743237	0.00287889	0.00220993	0.00138611	0.00112484	0.00250043	0.000760343	0.00176605	0.000851276	0.00223125	0.0013702	0.00169388	0.00283315	0.001975	0.00180929	0.000967966	0.00254415	0.000942928	0.00343763	0.000970501	0.00125614	0.00278441	0.0014145	0.000464653	0.00216339	0.00176122	0.00188772	0.00266113	0.000463809	0.00103913	0.00143423	0.00191294	0.00309929	0.00104402
CAAGGC	0.000703312	0.000309478	0.000560657	0.000117445	0.000474678	0.000391495	0.000492164	0.000217834	0.000122477	0.000171593	0.000407943	0.000245779	0.000539714	0.000354019	0.000144949	0.000315137	0.000146208	0.000175347	0.000144716	0.000398953	0.000169946	0.000127071	0.000185706	0.000128988	0.0001835	0.00019536	0.0001593	0.000172355	0.000180693	6.76574e-05	0.000418434	8.13829e-05	0.00052984	7.4871e-05	0.000417236	0.000711053	7.34818e-05	0.000343078	0.000524925	0.000409897	0.000174057	0.000203913	0.000201159	0.000233971	0.000296836	0.00018428	0.00023533	0.000114966	0.000222446
GCAAGG	0.000414944	9.47728e-06	0	0	5.59209e-05	1.91605e-05	9.45593e-05	4.81748e-06	2.22365e-05	2.67778e-05	0	0	9.88566e-05	1.0692e-05	2.78241e-05	3.09588e-05	0	4.46676e-06	0	0	0	2.85325e-05	3.92075e-05	7.25179e-06	8.43188e-06	1.7857e-05	7.29842e-06	0	0	0	8.94106e-06	1.73473e-05	0	1.88855e-05	1.70153e-05	0	5.49104e-06	4.36026e-06	0	2.08422e-05	0	0	7.36811e-06	0	9.39432e-06	8.45372e-06	0	4.23735e-05	0
GGCAAG	0.000421773	4.72646e-06	4.89322e-05	1.72516e-05	4.47265e-05	1.17853e-05	7.74128e-05	1.95734e-05	0	1.1666e-05	0	5.60857e-06	8.28418e-06	6.57087e-06	0	0	2.84236e-05	2.29213e-05	0	8.34892e-06	2.18509e-05	1.43876e-05	5.79481e-05	6.68042e-06	8.43188e-06	9.26012e-06	7.37289e-06	8.20349e-06	0	4.63043e-06	0	0	0	1.38444e-05	3.02857e-05	0	4.81522e-06	3.04795e-05	1.18226e-05	2.66234e-05	1.66624e-05	5.76861e-06	6.50787e-06	0	0	8.36475e-06	0	5.8525e-06	7.22796e-05
AGGCAA	5.71124e-05	0	0	0	8.91567e-05	1.84317e-05	3.97466e-05	0	0	3.79445e-06	0	5.52184e-06	8.28418e-06	0	8.10351e-05	0	0	9.09922e-06	0	8.34892e-06	0	0	3.21254e-05	1.43664e-05	8.25713e-06	4.79588e-06	5.96298e-05	9.0324e-06	0	1.58413e-05	0	5.77227e-06	0	0	2.0249e-05	0	0	8.7907e-06	0	0	0	5.50237e-06	7.26297e-05	1.2182e-05	4.40567e-06	4.18226e-06	0.000151205	2.36076e-05	3.60464e-05
CAGGCA	5.01018e-05	2.5136e-05	0	2.62809e-05	4.49879e-05	2.40017e-05	3.75681e-05	4.84231e-06	2.20619e-05	7.74975e-06	0	1.12184e-05	1.75373e-05	1.63877e-05	8.95756e-06	0	0	3.17169e-05	1.60413e-05	1.67835e-05	4.56201e-05	1.82844e-05	4.58032e-05	6.96452e-06	1.66876e-05	1.31147e-05	2.97748e-05	4.75656e-06	0	4.60681e-06	2.68232e-05	5.5991e-06	0	0	2.0249e-05	0	1.04536e-05	5.17437e-05	0	2.01941e-05	1.67005e-05	5.76861e-06	3.3111e-05	1.03817e-05	0	2.51629e-05	1.19436e-05	6.31674e-06	7.15402e-05
ACAGGC	0.000260558	0	4.90596e-05	8.94506e-06	5.04692e-05	0	3.81725e-05	0	1.12341e-05	0	0	0	0.00110224	0	9.09753e-06	0	5.89527e-05	4.12651e-05	1.58768e-05	0	0	0	5.82749e-05	2.08573e-05	1.68194e-05	1.32751e-05	0.000198077	2.50597e-05	0	0	9.03172e-05	1.74982e-05	0.000345467	0	9.9737e-05	0	1.48781e-05	4.40616e-06	0	0	0	5.76861e-06	3.32877e-05	1.08076e-05	0	9.14526e-06	2.38878e-05	3.0274e-06	0
CACAGG	0.000158907	1.10719e-05	2.44654e-05	8.94506e-06	3.94464e-05	6.69596e-05	4.03728e-05	0.000122796	1.27052e-05	7.49258e-05	0	3.12042e-05	0.000778069	8.24692e-05	1.94947e-05	0	5.89527e-05	0.00017168	0	0	0.000658582	4.11684e-05	5.17202e-05	5.28468e-05	8.43188e-06	3.37174e-05	0	2.76522e-05	0.000104767	5.76566e-05	5.57327e-05	0	0.000187514	2.67083e-05	9.97004e-05	3.81971e-05	0.000141583	2.88092e-05	9.69549e-05	6.85016e-06	0	2.48531e-05	2.31696e-05	3.32276e-05	5.11373e-06	3.86361e-05	0.000325715	5.11055e-05	0.000169017
CCACAC	0.000764328	0.000279371	0.00118761	0.000179902	0.00104979	3.61285e-05	0.000362844	0.000290062	0.000429651	0.000282897	0.00181204	0.000136547	0.00113913	6.41089e-05	0.00108292	0.000287698	0.000410565	0.0013732	3.24266e-05	0.000233912	0.00157113	0.000195191	0.000825055	0.000389458	0.000948515	0.000230715	0.000390361	0.000115336	0.0013377	0.0003616	0.000229229	6.45081e-05	0.000218038	0.000285277	0.000282582	6.90799e-05	0.00121344	0.000511279	0.000923307	0.00017804	0.000924979	0.000741835	0.000775316	4.37406e-05	0.000218711	0.000362703	0.000994502	0.000949678	0.00129468
ACCACA	0.000624151	3.87467e-05	0.000469655	8.99264e-06	0.000324323	0.000206327	0.000246638	4.46089e-05	0.000283633	8.6278e-05	0.000861774	0.000181836	0.000310836	0.000265399	0.000353054	0	0.000264478	0.0002392	0	4.36967e-05	0.000400659	0.000383366	0.000223182	0.00017086	0.000414875	0.000204649	0.000236464	8.17887e-05	0.000321582	0.000306697	0.000472568	5.95649e-06	4.71994e-05	0.000656467	0.000206338	0.00010362	0.000159535	4.45303e-06	2.4465e-05	7.50014e-05	8.62106e-06	8.01612e-05	0.000210541	0.000211403	8.65591e-05	7.73132e-05	0.000274342	0.000232647	0.000515507
CACCAC	0.000645291	2.44942e-05	0.000495761	0	0.000438894	3.76211e-05	0.000305075	9.94083e-06	0.000306055	5.09987e-05	0.00105646	5.0931e-05	0.000378572	7.54056e-05	0.000344145	0	0.000264478	6.48781e-05	1.58768e-05	9.3985e-06	0.000389622	1.47565e-05	0.000204126	8.46291e-05	0.000464602	9.00352e-05	0.000251478	4.74101e-05	0.000321582	5.3539e-05	0.000620463	0	3.11912e-05	2.84479e-05	0.000248167	0	0.000184873	0	3.61669e-05	6.96124e-06	1.69713e-05	6.9071e-05	0.000217116	5.68997e-05	3.61766e-05	5.61349e-05	0.000437847	0.000254635	0.000515507
CCACCA	0.000626958	1.01561e-05	0.00271022	4.68059e-05	0.000235969	6.01592e-06	0.000507839	0	9.27725e-05	1.18285e-05	0.000455127	0	0.0004426	1.36352e-05	2.79919e-05	0	9.1521e-05	1.38644e-05	6.79505e-05	1.85359e-05	0	7.14681e-06	3.21254e-05	0	0.000104025	2.24896e-05	0	2.59083e-05	0	9.70897e-06	0.0010436	6.18686e-06	7.85395e-05	9.40218e-06	0.000113893	0	5.96698e-05	3.6346e-05	0.000286129	0	8.35024e-06	4.0116e-05	4.18219e-05	3.41774e-05	1.88571e-05	3.5074e-05	0.000147978	6.15371e-06	0.000151316
CCCACC	0.00121493	0.000227525	0.00612927	0.000794095	0.00108002	0.00013066	0.00207487	9.01127e-05	0.000978487	0.000135145	0.000833073	0.000466503	0.00260567	0.000141041	0.000394729	0	0.0007982	7.87232e-05	0.000362406	0.000225429	0.000147548	0.000114177	0.000182894	0.000160088	0.000702471	0.000212383	0.000149109	0.000226388	0.000139948	9.0195e-05	0.00258101	0.00011161	0.00105099	0.000402726	0.00050128	3.33e-05	0.000281518	0.000144298	0.000733766	0.000163626	0.000126601	0.000360333	0.000295035	8.94066e-05	9.64582e-05	0.000289926	0.000543379	0.000329236	0.000486273
ACCCCA	0.000529017	1.92287e-05	0.000290807	0.000596075	0.000146647	6.01592e-06	0.000131832	9.86316e-06	0.000234262	2.30027e-05	0.000195235	2.81412e-05	0.000167367	6.04973e-05	1.83912e-05	0	3.01137e-05	1.81967e-05	8.06386e-05	1.72243e-05	2.25409e-05	3.63188e-05	4.52002e-05	2.76742e-05	2.49878e-05	9.12205e-06	1.52919e-05	3.79809e-05	0	1.90865e-05	0.000527317	6.02054e-06	4.59558e-05	6.62168e-05	0.000105153	0	1.99255e-05	2.71214e-05	2.37676e-05	2.01948e-05	8.26371e-06	1.70013e-05	3.35634e-05	3.34521e-05	5.05357e-06	9.03769e-06	2.38878e-05	1.4963e-05	7.22796e-05
GTCAAC	0.000871899	3.35568e-05	0.000792377	8.94506e-06	0.000749258	2.36305e-05	0.00138289	2.45206e-05	0.000755395	5.42232e-05	0.000450462	1.66227e-05	0.00206712	1.33186e-05	0.000248563	6.19192e-05	0.000473515	5.92933e-05	8.2604e-05	2.5613e-05	1.10378e-05	2.85873e-05	9.72535e-05	3.77303e-05	0.000268817	0.000141968	2.9991e-05	7.53718e-05	4.48229e-05	2.79499e-05	0.00166052	8.68503e-05	0.000766673	1.39914e-05	0.000323275	0.000136023	0.000214669	2.65929e-05	0.000378072	6.67269e-06	8.48349e-06	3.40374e-05	0.000219967	1.2182e-05	4.42838e-06	2.18715e-05	0.000212873	0.000134212	0.000147221
CTACCG	0.0016333	0.000656559	0.00252477	0.00104811	0.0015137	0.00065517	0.00247161	0.00111092	0.00137679	0.000840206	0.000692492	0.00046021	0.00349505	0.00101611	0.00170585	0.000530715	0.00284708	0.00150474	0.000939054	0.000957945	0.000478592	0.0019837	0.000327621	0.00130559	0.000685013	0.00110966	0.000200548	0.00128454	4.50552e-05	0.00165581	0.00246527	0.00150947	0.00220084	0.000476821	0.000670643	0.000878307	0.000306247	0.00128979	0.000990846	0.00207395	0.00121851	0.000944413	0.000276812	0.00120495	0.000675493	0.000741409	0.000329954	0.000601354	0.000338249
GCTACC	0.0015307	0.000607615	0.00106616	0.000786994	0.00140825	0.000612159	0.00160577	0.000886939	0.00125388	0.000828765	0.000671724	0.000910681	0.00271412	0.000998389	0.00168856	0.000408565	0.00278249	0.00147307	0.00061164	0.000946813	0.00036637	0.00200242	0.000320498	0.00132918	0.000649352	0.000988049	0.000157473	0.00132193	9.13087e-05	0.00172959	0.00207488	0.00140611	0.00112585	0.000949058	0.000374823	0.000669971	0.000295682	0.00127137	0.000809389	0.00207515	0.00119146	0.00115859	0.000289093	0.00105404	0.000592381	0.000747189	0.000329954	0.000736096	0.000147221
AGCTAC	0.000941858	0.000187858	0.000792246	0.000314935	0.000772743	0.000369054	0.0013829	8.91151e-05	0.000800742	0.000209976	0.000450581	0.000691492	0.00231272	0.000241066	0.000332085	0.000217862	0.000531097	0.000589348	0.000196513	0.000256816	0	0.0021482	0.000300499	0.00139174	0.000227275	0.000503877	7.60572e-06	0.000468817	4.62535e-05	0.00167444	0.00170655	0.000105438	0.000796163	0.00125671	0.000370907	0.000674263	0.000170046	0.000260731	0.000388805	0.000680514	0.000116668	0.000427397	0.000224095	0.00107993	0.000268358	0.000200365	0.000202298	0.000395022	0.000261774
TAGCTA	0.000162662	9.55113e-06	0	0	0.000166226	5.86087e-06	0	0	3.35858e-05	2.36131e-05	0	5.57936e-06	0.000179479	1.63515e-05	0	6.22384e-05	2.88654e-05	0	4.8124e-05	1.72734e-05	0	3.57341e-06	0	0	8.25713e-06	1.30458e-05	0	1.66388e-05	0	0	9.08224e-06	1.73171e-05	0	0	2.69429e-05	0	4.84004e-06	8.67557e-06	1.19457e-05	6.67269e-06	0.000156289	5.53073e-06	0	1.08633e-05	1.77824e-05	8.40787e-06	0	1.49793e-05	0
CTAGCT	0.000112895	4.75082e-06	0	0	0.000149433	5.86087e-06	0	4.99685e-06	1.1117e-05	1.98413e-05	2.16666e-05	0	0.000179479	1.62683e-05	1.00967e-05	6.22384e-05	0	9.07607e-06	0	1.72734e-05	0	3.57341e-06	7.0821e-06	0	1.6689e-05	1.78417e-05	0	1.66388e-05	0	0	9.08224e-06	1.73171e-05	1.56676e-05	4.762e-06	2.01722e-05	0	1.52939e-05	8.88251e-06	0	0	0.000164511	0	6.64275e-06	1.08633e-05	1.77824e-05	1.25901e-05	0	1.51623e-05	0
CCTAGC	7.15735e-06	0	0	0	5.56835e-06	0	0	2.94606e-05	0	0	0	5.57936e-06	0	0	0	0	0	0	0	0	0	7.31699e-06	0	3.40971e-06	0	0	0	1.24952e-05	0	0	8.89498e-06	0	0	4.762e-06	3.35043e-06	0	1.0221e-05	0	0	0	0	0	0	2.21259e-05	4.45133e-06	8.45166e-06	0	8.97782e-06	0
ACCTAG	0.000651524	0.000482704	0.000218287	0.000534923	0.000651308	0.000383061	0.000130564	0.00067643	0.000409673	0.000590275	0.000148067	0.000344132	0.000475591	0.000799818	0.000491204	0.000187203	0.00051928	0.00066	0.000561205	0.000724947	0.000288648	0.00019767	0.000255402	0.000149552	0.000421335	0.000549373	0.00013474	0.000791653	4.50552e-05	0.000183034	0.000375622	0.00110339	0.000106991	0.000171703	4.03961e-05	0.00013458	0.000195518	0.0010713	0.000415326	0.00143588	0.00084416	0.00077217	0.000147023	0.000109369	0.000307261	0.000391126	0.000175685	0.000345164	0
AACCTA	2.17394e-05	0.000103926	0	1.74835e-05	6.82138e-05	2.99589e-05	1.91336e-05	9.8591e-05	5.58855e-05	0.000128315	0	0.000449826	3.36655e-05	6.05738e-05	9.34741e-05	3.45173e-05	0	6.74252e-05	4.94039e-05	2.62926e-05	0	3.35454e-05	6.50765e-05	4.84002e-05	8.21456e-06	2.27065e-05	7.4489e-06	0.000219136	4.62535e-05	2.84922e-05	4.56104e-05	0.000876939	4.69199e-05	0.000370913	4.10977e-05	7.20436e-05	6.98224e-05	6.67027e-05	1.21999e-05	8.18884e-05	3.38891e-05	0.00044303	6.12669e-05	2.33448e-05	4.09126e-05	0.000124841	0	0.000234679	7.45926e-05
TAACCT	2.9437e-05	3.182e-05	8.18236e-05	5.59059e-05	2.93921e-05	0.000124204	6.31088e-05	0.000134757	5.60683e-05	0.00011097	0	3.48503e-05	8.91775e-05	4.83808e-05	4.68871e-05	7.00558e-05	2.99518e-05	6.28883e-05	0	6.36656e-05	1.2596e-05	1.98803e-05	5.76793e-05	4.55361e-05	2.64642e-05	5.53358e-05	5.42767e-05	0.000133806	0	3.07371e-05	2.91371e-05	0.000846802	6.91034e-05	9.32557e-06	3.23474e-05	0.000108909	1.02002e-05	6.72405e-05	7.38577e-05	0.000115596	8.35024e-06	0.000126912	7.54148e-06	4.87071e-05	3.34483e-05	7.71492e-05	0	9.13782e-05	4.08948e-05
AATTAA	0.00043572	4.27992e-05	0	1.73415e-05	6.71431e-05	4.71363e-05	0.000111663	5.81429e-05	2.21284e-05	6.05195e-05	8.41242e-05	2.21735e-05	3.28796e-05	4.93083e-05	8.09572e-05	3.11192e-05	2.87167e-05	3.58059e-05	1.58768e-05	1.68313e-05	2.20755e-05	4.99037e-05	6.42855e-05	2.72495e-05	8.21456e-06	1.30234e-05	2.22719e-05	3.73165e-05	0	2.35977e-05	4.47063e-05	4.62987e-05	1.52617e-05	1.8483e-05	2.3699e-05	6.78178e-05	3.37391e-05	3.8665e-05	1.18838e-05	3.28559e-05	1.64857e-05	4.96978e-05	4.98161e-05	0	2.20291e-05	3.76593e-05	1.1757e-05	5.57622e-05	0
CAATTA	0.000422137	4.8765e-06	0	0	3.37602e-05	1.25882e-05	5.64993e-05	1.0076e-05	0	1.63484e-05	4.18853e-05	3.33334e-05	1.6612e-05	9.93451e-06	1.80599e-05	0	0	9.54097e-06	1.60413e-05	0	0	3.58869e-05	6.07452e-05	3.80154e-05	4.60093e-05	8.85788e-06	0	1.3153e-05	0	4.82853e-06	8.89498e-06	1.7319e-05	1.55027e-05	0	2.03831e-05	0	1.03804e-05	0	1.19457e-05	0	9.11369e-06	1.65922e-05	0	0	1.79698e-05	8.51873e-06	0	1.29193e-05	0
TCAATT	0.000536772	0.000203416	0.000121817	2.65125e-05	0.000181086	0.000433786	0.000114665	0.000383031	0.000199368	0.000400121	0.000369319	0.000387146	3.27947e-05	0.000522083	3.7237e-05	0.00123265	2.88654e-05	0.000129955	0.000114061	0.000678256	5.54748e-05	0.000591473	0.000102659	6.77232e-05	0.000306035	0.00025739	0.000127523	0.000968409	0.000315386	6.18097e-05	2.78108e-05	0.00097465	0.000238686	4.93557e-05	5.44339e-05	3.75347e-05	0.00025407	0.000121257	0.000112776	5.79845e-05	3.30548e-05	0.000221347	3.40855e-05	0.00014396	0.000122328	0.000425924	3.48482e-05	0.000248231	3.64219e-05
TTCAAT	0.000423692	1.44263e-05	0	0	6.36813e-05	0	5.64993e-05	4.94425e-06	0	0	9.41808e-05	0	5.71788e-05	2.30067e-05	1.93297e-05	0	0	4.5608e-06	0	0	1.10378e-05	7.33588e-06	3.21254e-05	7.23375e-06	8.25713e-06	4.41725e-06	7.68663e-06	0	0	0	9.97471e-06	1.14881e-05	0.000238686	0	2.07724e-05	0	6.90522e-05	0	5.31096e-05	0	0	6.18221e-05	0.000106784	1.09196e-05	0	4.22583e-06	6.98748e-05	1.50593e-05	0
CTTCAA	0.000400776	2.52768e-05	0	2.5664e-05	6.16074e-05	0	5.64993e-05	3.14128e-05	0	1.17656e-05	4.1993e-05	0	0.00019575	1.31419e-05	1.87868e-05	3.08e-05	0	0	1.59586e-05	0	2.20189e-05	1.5414e-05	8.31059e-05	0	1.68713e-05	4.9957e-06	7.4489e-06	0.000258762	0	3.66896e-05	3.55799e-05	1.13983e-05	8.60305e-05	0	1.70153e-05	0	2.56903e-05	4.95367e-06	2.51747e-05	0	8.22112e-06	8.74288e-05	7.31563e-05	0	8.97392e-06	4.18226e-06	0	1.79951e-05	0
GCTTCA	0.000822782	4.82524e-05	0.00101082	4.78074e-05	0.000780707	2.69515e-05	0.00140153	2.17058e-05	0.000769635	4.18936e-05	0.000522661	1.84814e-05	0.0021151	8.19832e-05	0.000279213	0	0.000444038	6.55779e-05	0.000248461	3.78557e-05	1.26706e-05	9.83763e-05	0.000157747	2.4731e-05	0.000376454	0.000159187	0.000178932	0.000302581	0	8.54868e-05	0.00167874	1.77753e-05	0.000941169	2.64868e-05	0.000361097	0	0.000197311	4.89502e-05	0.000378072	0	7.46573e-05	0.000181032	0.000236452	2.46523e-05	5.08347e-06	9.39138e-05	0.00019434	0.000142047	0.000224646
GCGCTT	0.00101552	0.000670009	0.00237583	0.000489452	0.00105126	0.00134682	0.00233147	0.00111775	0.00100363	0.000949752	0.000708339	0.000314635	0.00302924	0.00106414	0.000370276	0.00114326	0.000628615	0.000214786	0.000331582	0.000797824	0.000209058	0.0004978	0.000226519	0.000252819	0.000355167	0.000555447	0.00026765	0.000356989	0	0.000164004	0.00223033	7.70196e-05	0.00246719	4.90386e-05	0.000687309	0.00108897	0.000183136	0.00101791	0.000522594	0.00133506	2.63772e-05	0.000754959	0.000181475	0.000545538	0.000528854	0.000959372	0.000177909	0.000312932	0.000301241
GGCGCT	0.00102966	0.000837887	0.00278743	0.000550725	0.00126269	0.00159367	0.00257386	0.00118103	0.00101469	0.00102647	0.000602592	0.00050338	0.00321048	0.00131438	0.000442679	0.00139158	0.000625091	0.000376423	0.000347624	0.00108757	0.000320123	0.000573703	0.000341415	0.000341135	0.000420928	0.000672956	0.000102944	0.000331496	0.000136364	0.000182887	0.00239152	0.000111893	0.00220726	5.83153e-05	0.00102788	0.00176205	0.000149104	0.0012711	0.000950106	0.00152186	0.000175254	0.00086591	0.000266049	0.00068755	0.000738019	0.00109815	0.000247959	0.000376649	0.000447148
CGGCGC	0.000996701	0.000656754	0.00230319	0.000489452	0.00102266	0.00132791	0.00233147	0.00107894	0.000959339	0.000934939	0.000603153	0.000320157	0.00315083	0.00105058	0.000352175	0.00114326	0.000596226	0.000214786	0.000331582	0.000797824	0.000209058	0.000480367	0.000239289	0.000235998	0.000364568	0.000568678	5.80192e-05	0.000227348	4.62535e-05	0.00016054	0.00226686	8.86542e-05	0.00187184	2.58447e-05	0.000691008	0.00112279	0.000139504	0.0010292	0.000510649	0.00130826	3.45983e-05	0.000726925	0.00016282	0.000545538	0.000502029	0.000963576	0.000154269	0.000302909	0.000338448
CCGGCG	0.00103222	0.000689958	0.00232766	0.000533498	0.00105705	0.00137639	0.00240824	0.00115743	0.000982333	0.000961611	0.000690485	0.000354722	0.00308043	0.00107449	0.000387981	0.00120632	0.000624649	0.000238056	0.000347459	0.000848747	0.000298999	0.000494814	0.000226519	0.00030484	0.000299322	0.000604858	0.000126677	0.000278226	0	0.000166239	0.00229351	0.000134575	0.00187101	6.78183e-05	0.000700922	0.0011221	0.000167017	0.0010178	0.000532869	0.00133584	7.53683e-05	0.000811463	0.000189404	0.000668349	0.000524173	0.000975931	0.000178969	0.000317973	0.000264819
GCCGGC	0.000974049	0.000636951	0.00230319	0.000515465	0.00106274	0.00134664	0.00233147	0.00106789	0.000948336	0.000929798	0.000603153	0.000320333	0.00303749	0.00107076	0.000361226	0.00120733	0.000596226	0.000229102	0.000331582	0.000806391	0.000288017	0.000480088	0.000226653	0.00026068	0.000289893	0.000546967	5.80192e-05	0.00024041	0	0.000766058	0.00226648	9.47393e-05	0.00185583	4.49184e-05	0.000670273	0.00115786	0.0001202	0.00100492	0.000510649	0.00130181	2.63772e-05	0.000727706	0.00012738	0.000556868	0.000515597	0.00096761	0.000154269	0.000302994	0.000264819
GCATTG	0.000765191	0.000190678	0.000604508	0.000280456	0.000962065	1.76434e-05	0.000391206	4.60089e-05	0.000761715	0.000227294	0.00023163	1.66517e-05	0.000213288	4.9907e-05	0.000536344	0	0.00115432	1.803e-05	0.000819318	2.67066e-05	0.000277266	0	0.000427578	3.39924e-05	0.000133417	3.92306e-05	0.000314444	0.000299631	0.000271512	0	0.000600294	2.31489e-05	0.00161851	4.78746e-06	0.000144984	0	0.00014606	3.90178e-05	0.000402972	0	0.000164896	0.000249446	0.000274679	0	5.78675e-05	3.42792e-05	0.000479907	8.00814e-05	0.00112685
GGCATT	0.00143137	0.000640457	0.00105202	0.000824652	0.00176171	0.000483274	0.000709347	0.000932128	0.00153159	0.00112953	0.000509696	0.000344189	0.000688878	0.000761069	0.00204786	0.000280885	0.00357817	0.00110568	0.00167482	0.000625589	0.000779903	0.000233515	0.000853369	0.000197725	0.000783889	0.000578463	0.00123238	0.00120239	0.000455327	0.000183059	0.00103051	0.00149744	0.00178743	0.000185619	0.000485906	0.000202765	0.000481657	0.000585504	0.000818298	0.00090774	0.00141539	0.00125991	0.000508421	4.37352e-05	0.000423043	0.000572663	0.000691614	0.000464588	0.00131187
CACACG	0.00141336	0.00141429	0.00132263	0.00176798	0.00223073	0.00184842	0.00109439	0.00150531	0.00136787	0.00160895	0.000815409	0.00175371	0.000808293	0.00224545	0.00187354	0.000951471	0.00165103	0.00320533	0.00216945	0.00129316	0.0030373	0.00397609	0.00150593	0.00265415	0.000595401	0.0014195	0.000760196	0.0010319	0.00176512	0.00136792	0.000745764	0.000332327	0.00210688	0.00376428	0.000945817	0.000997001	0.00266936	0.00141411	0.00214261	0.00114245	0.001342	0.00179026	0.00126117	0.0018927	0.00130107	0.000968814	0.00162935	0.00141221	0.00203462
ACACAC	0.00080762	0.000260779	0.000659809	0.000316196	0.00107514	1.17521e-05	0.000409941	0.00013004	0.000739767	0.000269721	0.000255876	8.97874e-05	0.0006146	8.60199e-05	0.00056229	0.000132578	0.00112546	7.3416e-05	0.000786817	6.80004e-05	0.000333921	4.49879e-05	0.000433895	5.80444e-05	0.0001073	0.000123443	0.000321932	0.000605335	0.000411007	7.0005e-05	0.000562662	1.15745e-05	0.00161851	0.000223272	0.000158209	0	0.000147552	4.41533e-05	0.00039127	6.0872e-05	0.000160391	0.000369168	0.000220201	1.121e-05	6.24372e-05	0.000201734	0.000468271	6.19945e-05	0.00116405
ATCACA	0.000765277	0.000719016	0.00050819	0.000829349	0.00112488	0.00137828	0.000410339	0.000397665	0.000917897	0.000988489	0.000529453	0.00149341	0.000222097	0.00191749	0.000533984	0.000255582	0.00103978	0.00119593	0.000835526	0.000226099	0.00100207	0.00324314	0.000363871	0.0019068	0.000454797	0.000830008	0.000351608	0.00161494	0.000782262	0.00100254	0.000580405	0.000951961	0.00158798	0.00272628	0.000203779	0.000345036	0.000561204	0.000295247	0.000343803	0.000923984	0.000156715	0.00048746	0.000542404	0.00178223	0.000527082	0.000324442	0.000976104	0.000739436	0.00125944
TTCATC	0.00132496	0.000577617	0.0010061	0.000637167	0.00198865	0.000187056	0.00130108	0.000347054	0.00175292	0.000784872	0.00154061	0.00029591	0.000890578	0.000429553	0.000969993	0.000163896	0.00130846	0.000488744	0.00141762	0.000185292	0.000736064	0.000109943	0.00142336	0.000359326	0.00129208	0.000513703	0.00111318	0.00089415	0.00118181	0.000415095	0.000860608	3.64103e-05	0.00278452	0.000373374	0.00118451	0.00025215	0.00208905	0.000138988	0.00054054	7.10227e-05	0.000513212	0.000643867	0.00132687	0.000543793	0.00014318	0.000272122	0.00249311	0.00137247	0.00374617
CTTCAT	0.00217479	0.00166743	0.00116876	0.00108287	0.00291976	0.00065883	0.00169288	0.00157841	0.00244046	0.00185694	0.00215894	0.000919544	0.00166454	0.00145435	0.00254401	0.0004759	0.00376117	0.0018283	0.00221953	0.00101173	0.00122442	0.000368679	0.00173757	0.000546256	0.00208787	0.00150113	0.00148174	0.00297923	0.00188603	0.000672937	0.00164238	0.00256077	0.00290685	0.000656311	0.00140676	0.000387413	0.00268534	0.00134571	0.00101523	0.00154053	0.00176234	0.00159385	0.00158135	0.000653048	0.000681873	0.00107726	0.00294133	0.0025397	0.00382093
CCTTCA	0.00139331	0.0017003	0.00154489	0.00183867	0.00234117	0.000770153	0.0019271	0.0017156	0.00223313	0.00197154	0.00163741	0.00239292	0.00133092	0.00120516	0.00189567	0.00153446	0.00169284	0.00284857	0.00157505	0.00108442	0.00145103	0.000851473	0.00156868	0.0013608	0.000848437	0.0011492	0.0007713	0.00143191	0.00219183	0.00148352	0.000940754	0.000573233	0.00307673	0.0014968	0.00131078	0.0015472	0.0030747	0.0016013	0.00182878	0.000661583	0.00110084	0.00260532	0.00162433	0.00135842	0.0010443	0.0011285	0.00251922	0.00220556	0.00351525
ACCGAA	0.00113514	0.0018632	0.000693728	0.00090092	0.00125113	0.0009655	0.000952458	0.00212882	0.00121593	0.00173718	0.000574231	0.00118427	0.00141096	0.00159035	0.00200931	0.000897227	0.00265707	0.00170813	0.00259733	0.0014251	0.000975849	0.00058977	0.000944224	0.000703888	0.0015537	0.0017904	0.000734394	0.00258983	0.00135511	0.00055096	0.00104853	0.00302444	0.000880045	0.000995797	0.000914505	0.00190426	0.00200036	0.00174247	0.000682586	0.00176307	0.00175055	0.001794	0.00182944	0.000704358	0.00156198	0.0016412	0.000769859	0.00201106	0.000346406
AACCGA	0.000403653	0.000732377	0.00046907	0.000411696	0.00033533	0.00032196	0.000590109	0.000845383	0.000399295	0.000566005	0.000147996	0.000580485	0.000607641	0.00038491	0.000452134	0.000504461	0.000260733	0.000393774	0.0017539	0.00050299	0.000333216	0.000137303	0.000262285	0.000251997	0.000266326	0.000692672	0.000196224	0.00044751	0.000180228	0.000172098	0.000462232	0.00060857	0.000704488	0.000340179	0.000646982	0.00134998	0.000855677	0.000579644	0.000205325	0.000273507	0.000372453	0.000773932	0.000413137	0.000445395	0.000941291	0.000619737	0.000200225	0.00062693	0.00022186
CAACCG	0.000382475	0.000164191	0.000275499	0.000148013	0.000173642	0.000240167	0.000366642	0.000188473	0.00022638	0.000244971	0.000147996	0.000159172	0.00041929	0.000197156	0.000181222	0.000286626	0.000145265	0.000191035	0.000198872	8.50076e-05	0.000111372	6.55591e-05	0.000198369	0.000109565	0.000152257	0.000114039	0.000181479	0.000197481	0.000135173	0.000134812	0.000310656	0.000191286	0.000414751	0.000127134	9.84883e-05	0.00013944	7.87885e-05	0.00034499	0.000193502	0.000213619	0.000258478	0.000240154	0.00011462	0.000139809	0.000144041	0.000170252	0.000165698	0.00012602	0.000113532
CAAAGT	0.000445971	0.0002379	0.000196652	0.000204021	0.000421738	2.38188e-05	5.70023e-05	0.000177125	0.000575124	0.00036758	0.000951299	0.000129324	0.000242629	9.40099e-05	0.000331151	0.000188857	0.000440022	8.24191e-05	0.000538995	0.000129862	0.000281608	1.45779e-05	0.000403603	9.34014e-05	0.000480169	0.000100115	0.00117235	0.000275863	0.000412202	3.41263e-05	0.000300091	5.8542e-05	0.00143929	2.381e-05	0.000563886	0.000173388	0.000293198	0.000235904	0.000424726	0.000262271	0.000546903	0.000338738	0.000481597	5.62315e-05	0.000161171	8.11071e-05	0.000774661	0.000136062	0.00118784
CCAAAG	5.70759e-05	9.55087e-06	0	8.89798e-06	1.70293e-05	1.97169e-05	3.71798e-05	0	2.16317e-05	7.68752e-06	6.29895e-05	0	4.15842e-05	2.7044e-05	4.63059e-05	0	2.90158e-05	1.42406e-05	3.20017e-05	0	0	3.61972e-05	2.56061e-05	7.43554e-06	1.6689e-05	1.43623e-05	4.49258e-05	2.91159e-05	0	1.44859e-05	8.94106e-06	5.80218e-06	6.12058e-05	0	0	0	5.42756e-06	1.29462e-05	0	1.33823e-05	0	2.30436e-05	6.71231e-06	2.31321e-05	1.79252e-05	9.43441e-06	7.03012e-05	1.22691e-05	0.000110231
GCCAAA	0.000689617	0.000182741	0.000466656	0.000280361	0.000921965	5.89124e-06	0.000372568	1.46276e-05	0.0006626	0.00020359	0.000231521	0	0.000196848	3.65469e-05	0.000488678	0	0.000952262	1.80315e-05	0.000705665	1.70883e-05	0.000243746	3.68745e-06	0.00030661	3.05286e-05	0.000132601	5.71495e-05	0.000239333	0.000297023	0.000225745	4.72741e-06	0.00051831	1.15745e-05	0.00152623	2.78104e-05	0.000125105	0	0.000112208	3.48393e-05	5.94191e-05	6.77805e-06	0.000143947	0.000259666	0.000242981	1.08076e-05	5.80103e-05	1.73845e-05	0.00047134	3.84461e-05	0.00101718
CGCCAA	0.0006967	0.000171809	0.000411355	0.000289215	0.000901475	1.24258e-05	0.000502457	9.7348e-06	0.000673659	0.000199341	0.000210525	1.69466e-05	0.000196848	3.32469e-05	0.00048896	0	0.000982054	8.9798e-06	0.000705665	3.4221e-05	0.000255076	0	0.000300192	3.38687e-05	0.000148947	4.77897e-05	0.000439543	0.000300444	0.000271999	0	0.00051831	3.45756e-05	0.00152623	4.61472e-06	0.000124699	0	0.000102349	3.90616e-05	9.50706e-05	6.6383e-06	0.000140799	0.000221609	0.000199986	0	4.89878e-05	2.15276e-05	0.000456945	7.77093e-05	0.00101718
CCGCCA	0.000740268	0.000182652	0.000693176	0.000288937	0.000952952	1.82566e-05	0.000446735	9.7348e-06	0.000684604	0.000219219	0.000252735	2.25275e-05	0.000196848	4.34383e-05	0.000534504	6.19192e-05	0.000952262	1.34237e-05	0.000755562	3.45855e-05	0.00030614	3.68745e-06	0.000351558	5.41339e-05	0.000159788	4.77897e-05	0.000231922	0.000279088	0.000225745	0.000119847	0.000588366	4.03769e-05	0.00160582	9.35152e-06	0.000135286	0.000143254	0.000132439	4.83819e-05	5.94191e-05	6.6383e-06	0.000123786	0.000226974	0.000206805	1.127e-05	6.23188e-05	2.57315e-05	0.000456514	5.04589e-05	0.00105323
TCCCGC	0.0007287	0.000241257	0.000411355	0.000308166	0.00101221	6.95874e-05	0.000391701	7.13772e-05	0.000685307	0.0002566	0.000326372	0.000121507	0.000366971	0.000145806	0.00062057	3.4125e-05	0.000952262	5.20348e-05	0.000787235	1.70883e-05	0.000243746	1.57323e-05	0.000385803	7.33099e-05	0.000132601	9.56963e-05	0.00026267	0.000467707	0.000271999	0.000111845	0.000573942	2.40679e-05	0.00178191	0.000181303	0.000159464	3.45399e-05	0.000237956	7.95015e-05	0.000136928	0.000194587	0.000174642	0.000341957	0.000339231	0.000145772	8.21019e-05	1.69275e-05	0.000481089	0.000147225	0.00109178
TTCCCG	0.000953436	0.000768303	0.00112741	0.000981788	0.00125375	9.04345e-05	0.000791583	0.000850497	0.00113603	0.000908478	0.000659416	0.000318352	0.000340423	0.000161897	0.00117401	0.000511327	0.00121758	0.00206333	0.00096635	0.000813336	0.00169965	0.000489947	0.00111853	0.000651449	0.000512391	0.000427701	0.000616938	0.000719502	0.000462274	0.000299392	0.00068112	7.04966e-05	0.00207725	0.000331033	0.000369449	0.000137977	0.00122573	0.00122696	0.00126237	0.000334252	0.000784896	0.00150514	0.000480307	8.88099e-05	0.000431962	0.0005388	0.000995216	0.000748097	0.0012111
CGTTCC	0.000764103	0.000271968	0.000507547	0.000340493	0.000967727	7.69781e-05	0.000466216	4.87361e-05	0.00079476	0.000226292	0.00025178	2.77078e-05	0.000221067	6.87534e-05	0.000615756	0	0.00101014	2.67552e-05	0.000866707	0.00015232	0.000288251	3.94298e-05	0.000403241	0.00011755	0.000156511	0.000113334	0.00105179	0.000408378	0.000225745	5.15446e-05	0.00063491	8.04581e-05	0.00161819	5.57254e-05	0.000204859	0	0.000146326	0.000121706	0.000355007	2.66948e-05	0.000247136	0.000259793	0.000272453	6.51978e-05	0.000107101	7.5386e-05	0.000492345	9.70854e-05	0.00112532
TCGTTC	0.00106728	0.00218147	0.00113361	0.0036521	0.00141083	0.00131498	0.00128365	0.00107428	0.00193111	0.00174682	0.00094617	0.00190881	0.000709935	0.00120176	0.00182364	0.0018885	0.00164132	0.00187973	0.00338777	0.00352461	0.00138117	0.00270616	0.000688525	0.00242339	0.00179134	0.0037059	0.001457	0.00373295	0.00139139	0.00230118	0.00247642	0.00589327	0.00198098	0.00117962	0.00346196	0.00114209	0.00069725	0.00268677	0.00143177	0.00212411	0.00157153	0.0018993	0.00125331	0.00301755	0.00406067	0.00398612	0.00188238	0.00272616	0.00256756
TTCGTT	0.000810228	0.000235604	0.00106467	0.000397568	0.00125797	8.53526e-05	0.000505703	1.45523e-05	0.00104042	0.000280165	0.00107707	1.11316e-05	0.000487829	0.000140961	0.000767117	0	0.000981128	5.24623e-05	0.000786907	7.82299e-05	0.000494336	0.0001153	0.0005186	8.32832e-05	0.000755802	7.26883e-05	0.000792555	0.000358177	0.000598179	7.20276e-05	0.000839365	3.45763e-05	0.00155761	4.55108e-05	0.000504167	0	0.000348326	6.98195e-05	0.000356285	1.32085e-05	0.000193674	0.000243831	0.00063561	6.58913e-05	8.11807e-05	0.000156762	0.000773384	0.000196553	0.00157965
CAGTCC	0.000495869	0.000153184	0.00038765	0.000322702	0.000884712	1.7705e-05	0.000279378	8.2503e-05	0.000662713	0.00026039	6.64577e-05	1.67725e-05	7.38704e-05	6.24724e-05	0.000461712	0.000154348	0.000923397	4.9124e-05	0.000689872	9.42652e-05	8.87025e-05	3.96866e-05	0.000261915	6.13105e-05	0.0001416	6.53712e-05	0.000105186	0.000107877	0.000225755	4.73655e-05	1.89277e-05	6.93648e-05	0.0015254	9.57492e-06	7.40951e-05	0.000100941	0.000107061	0.000237414	0.000308798	0.000193658	7.42886e-05	0.000342653	1.32297e-05	6.59295e-05	0.000225476	0.000121493	0.000538677	3.54192e-05	0.000691083
ACAGTC	0.000692318	0.000818204	0.000959735	0.00105903	0.0013361	7.83393e-05	0.000585618	0.000863091	0.00132229	0.000962961	0.000326342	0.000307287	0.000216642	0.000173783	0.00113947	0.000700798	0.00113083	0.00209007	0.000838084	0.000820179	0.00097875	0.000497031	0.00103166	0.00058836	0.000505381	0.00053655	0.000246538	0.000439971	0.00136309	0.000451008	0.000260816	0.000122388	0.00188202	0.000290207	0.000347765	0.000273458	0.00141409	0.00148446	0.00156246	0.000508658	0.000746312	0.00163316	0.0010357	0.000227117	0.000596364	0.000664748	0.00114162	0.00107267	0.000802673
GCACAG	0.000530959	0.000134852	0.000386091	0.000280365	0.000889908	2.98962e-05	0.000317343	1.47333e-05	0.000673717	0.000218594	0.000107257	2.78731e-05	9.07032e-05	4.9378e-05	0.000498073	9.30384e-05	0.000981278	1.34466e-05	0.000835443	2.77471e-05	0.000121933	3.68745e-06	0.000312412	0.000147117	0.000125104	0.000105167	9.18669e-05	6.23904e-05	9.05797e-05	8.3633e-05	4.6523e-05	5.80218e-06	0.00160317	5.59675e-05	7.39232e-05	3.45399e-05	0.000133207	4.78749e-05	0.000331665	1.37003e-05	7.42886e-05	0.000232728	6.81942e-06	0.000103779	7.1107e-05	0.000188982	0.000480718	4.01128e-05	0.000691083
GGCACA	0.000567128	0.000258229	0.000386091	0.00028931	0.00094222	3.64685e-05	0.000317247	4.51166e-05	0.000695234	0.00022253	0.000104571	4.49673e-05	8.22868e-05	6.36476e-05	0.000488732	9.30384e-05	0.000981278	2.70591e-05	0.000883736	2.77471e-05	0.000777557	2.54154e-05	0.000319002	0.000161099	0.000166654	0.000113899	8.23645e-05	9.20571e-05	0.000380858	0.000113041	7.46286e-05	1.14578e-05	0.00160317	5.59675e-05	0.000125749	6.90799e-05	0.000459208	0.000142684	0.000331665	2.69769e-05	0.000133542	0.000261264	5.72306e-05	0.000102807	0.000130395	0.000214649	0.000766203	0.000127326	0.000860099
TTGGCA	0.000729894	0.000211543	0.000489816	0.000289404	0.00101775	6.00742e-05	0.000391303	6.43368e-05	0.000695177	0.000270111	0.000231106	5.0636e-05	0.000214979	8.3463e-05	0.000555399	3.17778e-05	0.00101014	7.34982e-05	0.000851485	6.31055e-05	0.000413812	6.66e-05	0.00044162	8.61968e-05	0.000165188	8.33829e-05	0.000331393	0.00018965	0.000367673	4.3554e-05	0.000651566	4.63638e-05	0.00163722	0.000122833	0.000213528	0	0.00015796	7.06339e-05	0.000379516	0	0.000253486	0.000315072	0.000297357	6.80694e-05	8.03395e-05	6.02161e-05	0.000481472	8.64176e-05	0.00109043
ATTGGC	0.000722737	0.000181406	0.000434515	0.000290011	0.000945597	4.87784e-05	0.000521192	2.42369e-05	0.000706237	0.00022679	0.000230891	2.2497e-05	0.000189	5.70673e-05	0.000488732	0	0.000981278	5.96581e-05	0.000835443	3.4221e-05	0.000254727	2.5911e-05	0.000369847	5.48371e-05	0.000140333	5.67182e-05	0.00043939	0.000189017	0.000317765	1.91873e-05	0.000580497	5.18946e-05	0.00160317	1.43881e-05	0.000148498	0	0.000166583	6.11701e-05	0.000368138	5.46563e-05	0.000165859	0.000249803	0.000185795	5.54615e-05	5.3582e-05	3.88763e-05	0.000491914	8.35215e-05	0.00109043
GTATTG	0.000722737	0.000362422	0.000461371	0.000253944	0.000980842	3.59742e-05	0.000448412	0.000161473	0.000718504	0.000347037	0.000230891	0.000139616	0.000402761	0.000118938	0.000561658	0	0.000981278	5.9828e-05	0.000979984	0.000102177	0.000289513	2.88882e-05	0.000376301	7.13408e-05	0.000175813	0.00024485	0.00028143	0.000279328	0.000315856	3.90415e-05	0.000571748	0.000127649	0.00160317	0.000102373	0.000155037	6.87144e-05	0.000161301	8.38733e-05	0.000355311	3.33635e-05	0.000173814	0.000257034	0.000219892	2.18392e-05	0.000124711	0.000236086	0.000505921	0.000199066	0.00113039
TGGTAT	0.00109808	0.000271935	0.000943358	0.000341724	0.00142629	1.78291e-05	0.000428481	5.85356e-05	0.000927951	0.000345269	0.000653987	1.65387e-05	0.000492127	4.28214e-05	0.000533744	0	0.00138615	2.25204e-05	0.00133417	5.9612e-05	0.00039931	3.55508e-06	0.000460223	4.06544e-05	0.000372147	5.21607e-05	0.000816953	0.00120411	0.000270568	0	0.000705723	1.73467e-05	0.0022911	3.73565e-05	0.000256174	0	0.000292243	7.37187e-05	0.00035497	4.67089e-05	0.000140187	0.000243681	0.00037858	0	0.000111333	2.0998e-05	0.000608813	6.18706e-05	0.00127141
GTGGTA	0.000764751	0.000181371	0.000725699	0.000315678	0.00131469	0.000162884	0.000279378	3.46926e-05	0.000861477	0.00029643	8.37935e-05	0.000141746	0.000106664	0.000161296	0.000524885	0	0.0012125	0.000161039	0.00133417	9.47868e-05	0.000233171	0.000368477	0.00039565	9.3031e-05	0.000156931	0.000119308	0.000435378	0.000125352	0.000135403	0.00022521	6.3063e-05	1.75309e-05	0.00167955	0.000594635	0.000151633	0.00010362	0.000220094	5.20796e-05	0.000307959	6.13334e-05	8.25524e-05	0.000232757	0.000154051	0.000145553	0.000108182	2.54472e-05	0.000526632	3.52988e-05	0.000508413
CGTGGT	0.000530959	0.000124065	0.000410178	0.000262703	0.00101087	1.19392e-05	0.000396253	2.00608e-05	0.000762906	0.000222227	6.25783e-05	2.8105e-05	7.38704e-05	4.60135e-05	0.000515927	0	0.000981278	3.2002e-05	0.000851485	2.74173e-05	0.000110779	7.11035e-06	0.000331567	4.0994e-05	0.000132379	5.63553e-05	7.47994e-05	6.24788e-05	9.05797e-05	9.3086e-06	9.14351e-05	5.80218e-06	0.00160515	4.762e-06	0.000126839	0	0.000203306	3.46133e-05	0.000296013	6.60426e-06	9.91237e-05	0.000244027	2.09521e-05	0	7.14118e-05	1.67941e-05	0.0006334	0.000135906	0.000436318
ACCGTG	0.000805275	0.000215162	0.00259716	0.000336286	0.00100488	1.19392e-05	0.000690879	2.44665e-05	0.000775887	0.000237886	0.000210109	2.76381e-05	0.00038629	4.0017e-05	0.000516336	3.06429e-05	0.00107362	2.72873e-05	0.00091919	6.05077e-05	0.000254727	3.57341e-06	0.000402649	4.0636e-05	0.000344306	0.000112256	0.000255208	0.000154429	0.000225745	0	0.000910242	2.35336e-05	0.00160419	2.35378e-05	0.000171425	0.000133048	0.000122213	8.024e-05	0.000331359	5.39893e-05	0.000140187	0.000256547	0.000220693	3.35687e-05	8.11073e-05	6.89965e-05	0.00062943	5.93312e-05	0.00102694
AACCGT	0.000559294	0.00012468	0.000434911	0.000273717	0.000901499	2.54245e-05	0.00032145	3.61857e-05	0.000743001	0.000233651	0.000105122	1.69466e-05	0.000122976	7.6198e-05	0.000556548	6.19192e-05	0.000981278	6.97609e-05	0.000787069	3.62817e-05	0.000121703	7.147e-06	0.000332138	5.78044e-05	0.000126389	7.69323e-05	0.000788372	0.000114172	0.000136833	0.000141748	7.08505e-05	1.15449e-05	0.00160293	0	8.48416e-05	0.000100935	0.000174448	3.4679e-05	0.000306935	0	0.00022233	0.000349481	4.13817e-05	2.31494e-05	4.89878e-05	3.57797e-05	0.000531206	7.32464e-05	0.000472364
GAACCG	0.00057361	0.000668981	0.000530988	0.000474012	0.000962324	0.000100713	0.00054129	0.00067786	0.000927493	0.000548529	8.40168e-05	0.000546511	0.000262697	0.000271849	0.00068737	0.000155596	0.000981278	0.000171795	0.00231009	0.000444226	0.000299336	6.86471e-05	0.000395655	0.000197642	0.000239766	0.000639464	9.70716e-05	0.000279116	0.000181888	6.65056e-05	0.00016934	0.000383016	0.00187756	0.000251328	0.000629768	0.00131397	0.000794231	0.00023885	0.000319719	6.05852e-05	0.000190328	0.000784019	0.000312994	0.000372203	0.00085629	0.000437257	0.000526752	0.000535138	0.000580692
TCGAAC	0.000523876	0.00011929	0.000337293	0.000201249	0.000800951	5.89124e-06	0.000279378	4.8674e-06	0.000684118	0.000210803	6.25783e-05	5.55045e-06	9.02248e-05	2.30407e-05	0.000506639	0	0.000952412	8.9798e-06	0.000787069	8.56634e-06	9.96837e-05	0	0.000312412	2.7154e-05	0.000107473	4.34635e-05	8.23645e-05	0.000220557	9.05797e-05	0	0	5.80218e-06	0.00160349	0	6.04692e-05	0	0.000121889	3.90616e-05	0.000331603	0	7.42886e-05	0.00021605	0	0	4.89878e-05	1.26118e-05	0.000468211	2.05685e-05	0.000436318
ATCGAA	0.000610846	0.000193579	0.00179637	0.000426821	0.000894241	2.4996e-05	0.00106916	0.000135137	0.000807427	0.000214739	6.25783e-05	1.66227e-05	0.00079598	3.40649e-05	0.000506639	0	0.001017	1.39888e-05	0.00100203	6.34768e-05	0.00011228	0	0.000319535	3.85066e-05	0.000135271	0.00012605	0.000124376	0.000247526	9.05797e-05	0	0.000328964	1.17905e-05	0.0026605	0	0.000365198	7.52877e-05	0.000121889	0.00012144	0.000477593	1.39813e-05	8.35613e-05	0.000259429	1.49953e-05	7.36609e-05	0.000173196	5.92428e-05	0.000468211	2.05685e-05	0.00051787
CATCGA	0.00063195	0.000237168	0.00182339	0.000426821	0.000955385	3.70918e-05	0.0010877	0.000140004	0.000841427	0.000218553	6.25783e-05	2.26751e-05	0.00079598	3.40649e-05	0.000641696	0	0.001017	1.39888e-05	0.00100203	7.19987e-05	0.000178337	3.68745e-06	0.000319535	3.85066e-05	0.000283134	0.00012605	0.000325853	0.000247725	9.05797e-05	0	0.000329866	1.76229e-05	0.0026605	9.52399e-06	0.000368655	0.000110199	0.0002138	0.00012144	0.000477593	7.4441e-06	9.20448e-05	0.000265166	0.000101009	7.36609e-05	0.000173196	6.77408e-05	0.000631112	3.53139e-05	0.000553916
GGGTAC	0.00110349	0.000451686	0.000510341	0.000457968	0.00161002	0.000157785	0.000487905	0.00018203	0.00117325	0.000403361	0.000839468	0.000161014	0.000644499	0.000286063	0.000899766	9.40282e-05	0.00112868	0.000305283	0.000964712	3.44018e-05	0.000454617	9.59499e-05	0.000514935	0.00038228	0.00049312	0.000157026	0.000600858	0.000542256	0.00124239	0.000178397	0.00116052	1.74069e-05	0.00199199	0.000278769	0.000293875	0.000245254	0.000828887	0.000210178	0.000552417	7.47472e-05	0.000324293	0.000386348	0.00108371	4.53874e-05	0.000158883	0.000111267	0.00117404	0.000518676	0.00123694
CGGGTA	0.000765589	0.000206895	0.000797461	0.000700875	0.00100265	3.04426e-05	0.000615353	4.45819e-05	0.00109574	0.000403749	0.000445896	2.79604e-05	0.000314441	4.9883e-05	0.000597536	6.19192e-05	0.00106802	2.30686e-05	0.00083536	0.000180729	0.000576598	2.5325e-05	0.000535997	0.000105399	0.000276689	6.08204e-05	0.0010219	0.000480082	0.000408819	6.19529e-05	0.00118872	9.88209e-05	0.00161843	2.37612e-05	0.000177262	0	0.000196037	9.76384e-05	0.000332565	3.33993e-05	0.000174348	0.000293774	0.000322672	1.13305e-05	8.97092e-05	9.30265e-05	0.000549963	7.7391e-05	0.00112666
GCGGGT	0.000715707	0.000171729	0.000482691	0.000262703	0.000945603	1.79551e-05	0.000391206	1.46791e-05	0.000697202	0.000238872	0.000231413	2.24669e-05	0.000204962	4.32585e-05	0.000506685	6.19192e-05	0.00101014	8.9798e-06	0.000819567	5.18975e-05	0.000254841	3.61063e-06	0.000363265	4.74404e-05	0.000141205	4.34635e-05	0.00026224	0.000291364	0.000271754	0	0.000553938	2.31193e-05	0.00158614	2.37355e-05	0.000141662	0	0.00012729	5.84182e-05	0.000296975	6.60426e-06	0.000131923	0.000232562	0.000206003	0	4.89878e-05	2.54936e-05	0.00050324	4.16615e-05	0.00109043
TGCGGG	0.000726886	0.000241176	0.00048464	0.00039894	0.00158357	7.56029e-05	0.000525245	0.000111384	0.000730972	0.000311851	0.000673734	0.000218522	0.00053794	0.000206602	0.000973541	6.60719e-05	0.00101014	0.000126701	0.000801835	1.70883e-05	0.000847605	2.32898e-05	0.000568512	0.00015679	0.000183062	0.000144619	0.000462053	0.000441341	0.000734781	0.000121328	0.000738073	2.99617e-05	0.00182675	0.000176541	0.000252887	3.45399e-05	0.000702033	0.000183466	0.000386749	0.000105578	0.000530431	0.00025647	0.000533927	0.000156922	8.66716e-05	4.7092e-05	0.000960816	0.000228857	0.00142695
CTGCGG	0.000672846	0.000166775	0.000459784	0.000271741	0.000939842	1.85115e-05	0.000391206	1.97285e-05	0.000708204	0.000267284	0.000231307	5.07169e-05	0.000204962	5.03518e-05	0.000470623	0	0.00101014	3.32585e-05	0.000801835	4.35515e-05	0.000255076	3.69973e-05	0.000383587	5.20947e-05	0.000152112	4.34635e-05	0.00027033	0.000295955	0.000225745	2.90235e-05	0.000580715	1.73467e-05	0.00160349	2.86741e-05	0.000138657	3.33e-05	0.000117668	5.84182e-05	0.000308921	7.57547e-06	0.000175589	0.000227168	0.000207398	1.08633e-05	7.57224e-05	4.08608e-05	0.000493168	4.50288e-05	0.00105438
TCTGCG	0.000680191	0.000211023	0.000509496	0.000262748	0.00119773	5.89124e-06	0.000410339	5.96243e-05	0.000788808	0.000251164	0.000275524	2.84341e-05	0.000205264	2.99083e-05	0.000619043	0.000159565	0.00103978	1.36138e-05	0.00104893	8.71239e-05	0.000312026	2.22233e-05	0.000731399	9.35191e-05	0.000242752	4.34635e-05	0.000362283	0.000415586	0.000410759	0	0.000609057	2.34874e-05	0.00227674	4.28582e-05	0.000214573	0	0.000432166	6.28712e-05	0.000296975	0	0.000446314	0.000335724	0.000424476	0	5.34162e-05	2.5559e-05	0.000852496	0.000389252	0.00150114
TGCGCA	0.000786859	0.00108569	0.000416993	0.000526163	0.000972027	0.000447803	0.000358787	0.00121424	0.000702176	0.00094274	0.000277495	0.000583644	0.000656298	0.00103028	0.00151154	0.000346129	0.00242385	0.00118568	0.000801911	0.000887901	0.000488358	0.000265824	0.000500895	0.000233157	0.000872523	0.000915799	0.000311442	0.00112966	0.000501404	0.000264933	0.000554419	0.00129454	0.000141122	0.000288233	0.000269532	0.000168226	0.000580968	0.0011503	0.000474871	0.0013566	0.00124095	0.000900971	0.000266643	0.000109197	0.00052522	0.000765159	0.000435154	0.00102466	7.8047e-05
TGCCCC	0.0014553	0.00146038	0.0015325	0.00101032	0.00218326	0.000870427	0.00109419	0.00125508	0.00185387	0.00125842	0.00116385	0.000736716	0.00113529	0.00113543	0.00192311	0.000635208	0.00263716	0.00187541	0.00155245	0.0011038	0.00151566	0.00220132	0.0013667	0.00176311	0.0024374	0.00130025	0.00182022	0.001634	0.00256164	0.00216388	0.000592372	0.00140605	0.00113098	0.000649166	0.000705036	0.000770571	0.00280288	0.00153066	0.000501312	0.00228103	0.00153761	0.00111163	0.00271689	0.00152238	0.000775113	0.000755558	0.00239493	0.00245729	0.00194169
GTTGCC	0.00143401	0.00139142	0.000912153	0.00100119	0.00212127	0.000900892	0.0010743	0.00120042	0.00182064	0.00119888	0.00107853	0.000679696	0.00104323	0.00110863	0.00200424	0.00060309	0.00263716	0.00180221	0.00155245	0.00111246	0.00144754	0.0021577	0.00133453	0.0017529	0.00235132	0.00129118	0.00182767	0.00157897	0.00227492	0.00207017	0.000488965	0.00132393	0.0010688	0.000630108	0.00059136	0.00077093	0.00261058	0.00142056	0.000501128	0.00222695	0.00146139	0.00107692	0.0025393	0.00153382	0.000724421	0.000755909	0.00236972	0.00236343	0.00190545
GGTTGC	0.00144099	0.00137697	0.001217	0.00100124	0.00211565	0.000900417	0.00101779	0.00118569	0.00184305	0.00120689	0.00107853	0.000741608	0.00105165	0.00111529	0.00193216	0.000603592	0.00278149	0.00179782	0.00153641	0.00107811	0.00145893	0.00212525	0.00134636	0.00172524	0.00234306	0.00129558	0.00185057	0.00155744	0.00227492	0.00204021	0.000524921	0.00130649	0.0010688	0.000626143	0.000565018	0.000770045	0.00261035	0.00141624	0.00050125	0.0022533	0.00147062	0.00107703	0.00253117	0.00152238	0.000711509	0.000746329	0.00238046	0.00235086	0.00190545
GCGTCA	0.00081031	0.00106623	0.000218287	0.000535156	0.000966711	0.000441881	0.000417788	0.00121491	0.0006577	0.000931642	0.000190387	0.000594745	0.000697907	0.00103659	0.00151182	0.000346129	0.00242385	0.00120789	0.000817952	0.000879421	0.000466168	0.000265824	0.000451981	0.000272111	0.000889268	0.000924976	0.000272069	0.00112548	0.000501404	0.000290788	0.000534104	0.00130049	0.00013834	0.000288233	0.000251818	0.000168226	0.000545041	0.0011406	0.000450918	0.00146357	0.00124086	0.000890555	0.000335689	0.000121378	0.000520769	0.000797481	0.000435154	0.00103275	4.1625e-05
TGCGTC	0.0008294	0.00158736	0.000847922	0.000807503	0.00149645	0.000827035	0.000826745	0.00153852	0.000989031	0.00126141	0.000338577	0.00161255	0.00105281	0.00138848	0.00191987	0.000938093	0.00274122	0.00151023	0.00214889	0.00168448	0.00100357	0.000391507	0.000711104	0.00044198	0.001087	0.00124955	0.000563008	0.00134715	0.000592712	0.000402748	0.000685914	0.00158498	0.000931211	0.00048311	0.00102763	0.00084113	0.00103528	0.00146687	0.00146043	0.0017172	0.00151462	0.00131864	0.000635176	0.000341544	0.0013736	0.00104643	0.000803139	0.0013379	0.000478351
TTCACG	0.000939581	0.00178864	0.000818021	0.00132734	0.00155189	0.000654693	0.000682514	0.00217242	0.00136014	0.00191173	0.000856776	0.000957618	0.000823665	0.00134197	0.00233927	0.000823332	0.0026645	0.00355911	0.00111598	0.00171928	0.00149791	0.000772528	0.00101611	0.000844075	0.0011701	0.00153748	0.000347208	0.00259637	0.00188491	0.000712608	0.000631791	0.00257248	0.000404439	0.000759774	0.000415632	0.000526112	0.00194043	0.00252577	0.00172822	0.00191453	0.00195615	0.00245325	0.000739798	0.000284976	0.000964181	0.00149428	0.00103863	0.00237601	0.000223181
ATTCAC	0.000807524	0.00131234	0.000218287	0.000710707	0.00112565	0.000489016	0.000447162	0.00134986	0.000993057	0.00116655	0.000551986	0.000701009	0.000729788	0.00110431	0.00159293	0.000342963	0.00239543	0.00133474	0.000898848	0.00101588	0.000579066	0.000294566	0.000398744	0.000296668	0.00092989	0.00110142	0.000507521	0.00211923	0.00142094	0.000437006	0.000622704	0.00254174	0.000388854	0.00045866	0.000187579	0.00040344	0.00116449	0.00126002	0.000559898	0.00152448	0.00132552	0.00102379	0.000637973	0.000152941	0.000678302	0.000937547	0.000865445	0.00172411	0.000148986
CATTCA	0.000765278	0.00118791	0.000398196	0.000527047	0.00100646	0.00045974	0.0003356	0.00125621	0.000993057	0.00110423	0.000423095	0.000617566	0.000680894	0.00100449	0.00154705	0.000407845	0.00239543	0.00129839	0.000834847	0.000913514	0.000533684	0.000255048	0.000328029	0.000217917	0.00087982	0.00100571	0.000285674	0.00206412	0.0010986	0.000315451	0.000613763	0.00254186	0.000388854	0.000301885	0.000157194	0.000202765	0.000865864	0.00125557	0.000559898	0.00149016	0.00129981	0.00100167	0.000485139	0.000120407	0.000588959	0.000954406	0.000866001	0.00124778	7.43937e-05
TCATTC	0.000764994	0.0013354	0.00073904	0.000622249	0.000939611	0.000495745	0.000428006	0.00178363	0.000742788	0.00123796	0.000423095	0.000807005	0.000812972	0.00112967	0.0016548	0.000407845	0.00245316	0.00158023	0.00141099	0.00105826	0.000488358	0.000708656	0.000269036	0.000262461	0.000868801	0.00135061	0.000292445	0.00238112	0.000450552	0.000318606	0.000411386	0.00265761	0.000137594	0.000347952	0.00034675	0.00124418	0.000809853	0.00134105	0.000486447	0.00151689	0.00131883	0.00149768	0.000300689	0.000393524	0.00077881	0.00130316	0.000433183	0.00145109	3.62332e-05
TTCATT	0.000871855	0.00107987	0.000218287	0.000517917	0.00093739	0.000471774	0.000412835	0.00124634	0.000687548	0.00110019	0.000618327	0.000675139	0.000755451	0.00105509	0.00158397	0.000312004	0.00245271	0.00133537	0.000801911	0.000930334	0.000510782	0.000288235	0.00027583	0.000218253	0.000803352	0.00101957	0.000293483	0.00209368	0.000450552	0.000277053	0.000852886	0.00253028	0.000122332	0.00050645	0.000222251	0.000168226	0.000612098	0.00122426	0.00046274	0.00153112	0.00124913	0.000961777	0.000247656	0.000120347	0.000543262	0.000920773	0.000457821	0.00117232	0.00011044
AGAACT	0.000735976	0.00110391	0.000218287	0.000735091	0.000840807	0.000549896	0.000467329	0.00131299	0.000720699	0.00116366	0.000444091	0.00074173	0.000705235	0.00115792	0.0015763	0.000373922	0.00245332	0.00145906	0.00081787	0.000886387	0.000499395	0.000324349	0.000269815	0.000290116	0.000803737	0.00106366	0.000262068	0.00197313	0.000450552	0.000306214	0.000402351	0.00250722	0.000122332	0.000448087	0.000110844	0.000273713	0.000546239	0.00121267	0.000462802	0.00154351	0.00119955	0.000997234	0.00024251	0.00015265	0.000556242	0.000959551	0.000426567	0.00114971	0
AAAGAA	0.00135163	0.00199524	0.00164997	0.00136983	0.00229318	0.000581341	0.00104409	0.00215565	0.00273686	0.00199465	0.00109507	0.00106275	0.00128284	0.00126605	0.00246898	0.000791385	0.00310185	0.0033835	0.00174389	0.00181235	0.00219431	0.000764976	0.00174048	0.000965876	0.0015463	0.00153682	0.00180642	0.00283793	0.0019339	0.000708163	0.00151996	0.002544	0.000696581	0.000587257	0.000669336	0.000408927	0.00213536	0.00254571	0.00183751	0.00187885	0.00195149	0.0025296	0.00128449	0.000242755	0.000959604	0.00146119	0.00132078	0.00237285	0.000591493
TACCGA	0.000674555	0.00103534	0.000345468	0.00113046	0.000798688	0.000673724	0.000362348	0.00139984	0.000695338	0.00145358	0.000172204	0.000786458	0.000982188	0.00136458	0.00163343	0.00170065	0.00233815	0.00181266	0.000875267	0.00134774	0.000575431	0.000521156	0.000695497	0.000560214	0.000923541	0.0011937	0.000470823	0.00169627	0.00104629	0.00052861	0.000661377	0.00179402	0.000207944	0.000655523	0.000310856	0.00102638	0.00120698	0.00111702	0.000489461	0.00314963	0.00136153	0.00114093	0.00155501	0.000520983	0.000651803	0.00184911	0.000428401	0.00111873	0.000196269
CGCTAC	0.000899302	0.00202874	0.000442124	0.00188532	0.00170935	0.0058673	0.000817286	0.00277759	0.000838271	0.00278535	0.000604095	0.00474529	0.001219	0.00510067	0.00210887	0.00312606	0.00230989	0.00362089	0.00049738	0.00253665	0.00133405	0.00512485	0.000780511	0.00414504	0.000667282	0.00264516	0.000695131	0.00212607	0.00101543	0.00545391	0.000916544	0.00201606	0.000184511	0.00614997	0.000570381	0.00428105	0.00152908	0.00224461	0.000428285	0.003566	0.00169212	0.00140411	0.00137183	0.00458326	0.00207851	0.00153131	0.00101651	0.00124825	0.000484158
TCGCTA	0.000651339	0.000654577	0.000266586	0.00111253	0.000656847	0.000471522	0.000223464	0.000871256	0.000520331	0.00116932	0.000147958	0.000671816	0.000518707	0.000901948	0.00145611	0.000312004	0.00233799	0.00151731	0.000512914	0.00077899	0.000377407	0.000265823	0.000255499	0.000261703	0.000412952	0.000604425	0.000149715	0.000924853	0.000270803	0.000211732	0.00039355	0.00163057	0.000122332	0.000190258	8.79587e-05	0.000606673	0.000150947	0.00103665	0.000415326	0.0015023	0.00119124	0.000900095	0.000193386	0.000240235	0.00041398	0.000609593	0.000175685	0.000559952	0
CTCGCT	0.000651303	0.000502006	0.000290673	0.000535389	0.000662445	0.000495529	0.000223464	0.000876124	0.000520331	0.000782879	0.0001484	0.000360872	0.000508174	0.000919387	0.00147412	0.000312004	0.00242385	0.001163	0.000528873	0.000759217	0.000410873	0.000255222	0.000261754	0.000152927	0.000404821	0.00063036	0.000149715	0.000924964	4.50552e-05	0.000220541	0.000421315	0.00138136	0.000122332	0.000190258	8.45736e-05	0.000168226	0.000320199	0.00108685	0.000427088	0.0015023	0.00121629	0.000877857	0.000312307	0.00010914	0.00041398	0.000585076	0.00024556	0.000450995	0
CCTCGC	0.000644255	0.000584285	0.000343895	0.000587631	0.000662445	0.000701131	0.000223464	0.000876124	0.000520331	0.000896208	0.000169396	0.000372487	0.000562476	0.00112214	0.00148317	0.000374082	0.00242385	0.00121679	0.000528873	0.000759217	0.000422737	0.000601799	0.000255402	0.000220991	0.000404821	0.000665088	0.000149715	0.000937395	4.50552e-05	0.000672471	0.00041134	0.00132935	0.000137917	0.00114982	5.73596e-05	0.000168226	0.000359204	0.00111586	0.000427088	0.00156872	0.00120781	0.000877857	0.000458332	0.000218986	0.000472254	0.000622382	0.00024556	0.000498824	0
TCCTCG	0.000772922	0.000839338	0.000293597	0.000605015	0.000951134	0.000712322	0.000284078	0.00100275	0.00109926	0.00116593	0.000963891	0.000517623	0.000524529	0.00116181	0.00174432	0.000374082	0.00245271	0.00127965	0.000544914	0.000776034	0.000598861	0.000619458	0.000307927	0.000259619	0.00120804	0.000797975	0.000500548	0.00185776	0.00059105	0.000810826	0.000483722	0.00224106	0.000122332	0.00117314	5.05344e-05	0.000168226	0.00105595	0.00116229	0.000439033	0.00158203	0.00125854	0.000955891	0.000784555	0.000206804	0.000498395	0.000763968	0.000642384	0.00139585	3.60464e-05
TGCCTT	0.000673227	0.000516612	0.000447514	0.000580119	0.000799611	0.000485058	0.00033678	0.000934872	0.000714113	0.000971715	0.000299733	0.000366543	0.000475591	0.000906262	0.00151142	0.000312004	0.00242385	0.00131365	0.0008555	0.000828888	0.000502638	0.000255332	0.000425791	0.000194532	0.000658686	0.000627117	0.000949527	0.00101934	0.000183816	0.000230466	0.000448575	0.00148586	0.000153584	0.000199757	0.000337519	0.000202765	0.000369522	0.00108017	0.000403624	0.00146843	0.00126719	0.00107181	0.000281297	0.000121591	0.00041855	0.000580734	0.000211707	0.000526826	0.000189444
ATGCCT	0.000708535	0.000640798	0.000447514	0.000553189	0.00086649	0.000471522	0.000318142	0.000974507	0.000714113	0.000890895	0.000320277	0.000382985	0.000475591	0.000717716	0.00150242	0.000280885	0.00242385	0.00107425	0.0008555	0.000615926	0.000569094	0.000226368	0.000432346	0.000167215	0.000708229	0.000595701	0.000910648	0.000940228	0.000273926	0.000220438	0.000448575	0.00149161	0.000153584	0.000185619	0.000340995	0.000202765	0.000418507	0.000581033	0.000403624	0.000907775	0.00125049	0.00102194	0.000240596	4.37352e-05	0.000374078	0.000534244	0.000270371	0.000652748	0.000148787
AAATGC	0.000615922	0.000454745	0.000218287	0.000534923	0.000663125	0.000459678	0.000260741	0.000866314	0.000510343	0.000693561	0.000126852	0.000333059	0.000493425	0.000700965	0.00145611	0.000280885	0.00242385	0.00111922	0.000641329	0.000520418	0.000366312	0.000233515	0.000268869	0.000139376	0.000413078	0.000556742	0.00013474	0.000795865	4.50552e-05	0.000192639	0.00039355	0.00144509	0.000122332	0.000185619	5.05521e-05	0.000168226	0.000180948	0.000550939	0.000415326	0.00090774	0.00120886	0.000828103	0.000213066	5.61322e-05	0.000365175	0.00052982	0.000175685	0.000360059	0
TAAATG	0.000615922	0.000454226	0.000218287	0.000526253	0.000713176	0.000459678	0.000260741	0.000883312	0.000510343	0.000697395	0.00022158	0.000339251	0.000475591	0.000724775	0.00146516	0.000280885	0.00242385	0.00111922	0.000641329	0.000520418	0.000366312	0.000233515	0.000291224	0.000153268	0.000431609	0.000556655	0.00013474	0.000791722	4.50552e-05	0.000192639	0.000564225	0.0014509	0.000122332	0.000185619	4.71491e-05	0.000168226	0.000185813	0.000555392	0.000415326	0.000921696	0.00120064	0.000822629	0.000206423	4.37352e-05	0.000370002	0.000562383	0.00037987	0.000357074	0
ACTAAA	0.000746298	0.000984966	0.000268264	0.000976248	0.000742846	0.000939207	0.000567841	0.00142289	0.000565622	0.00119064	0.000215985	0.00169813	0.000763391	0.00119983	0.00167032	0.00114501	0.00242385	0.00132255	0.000641329	0.000765536	0.000377642	0.00052911	0.000510003	0.000816755	0.000522918	0.000936706	0.000272088	0.000983781	0.000413885	0.00105039	0.000503068	0.00186945	0.000122332	0.00085377	0.000244834	0.00121002	0.000345793	0.000698339	0.000415326	0.00112099	0.00125844	0.00112541	0.000439275	0.000898253	0.000873133	0.000927883	0.000295762	0.000611099	0
AACTAA	0.000795477	0.00104658	0.000291171	0.000993632	0.000748385	0.000962377	0.000586193	0.00148617	0.000632133	0.00127836	0.00023417	0.0017264	0.00078883	0.00142049	0.00169729	0.00123728	0.00245242	0.00157839	0.00065737	0.00102106	0.000457015	0.000582732	0.000510003	0.00080994	0.000531175	0.00104171	0.000301924	0.0011338	0.000413885	0.00108335	0.000512247	0.00192171	0.000152543	0.000872208	0.000265145	0.00121002	0.0003799	0.00124474	0.000438071	0.00170883	0.00162974	0.00129789	0.000466113	0.000984998	0.000953361	0.000986631	0.000318974	0.000767342	0
AAACTA	0.00084428	0.000693845	0.000388668	0.000755418	0.00104315	0.000676556	0.000432347	0.00103817	0.00068781	0.00107213	0.0002564	0.000542459	0.000567775	0.00132531	0.00199563	0.000503516	0.0023956	0.00163576	0.000854729	0.00110963	0.000656674	0.000746591	0.000857501	0.000430435	0.00072158	0.000863012	0.000643087	0.00121147	0.000230069	0.000483898	0.000439747	0.00149173	0.000576064	0.00085588	0.000198126	0.000340742	0.000579277	0.00108887	0.000415326	0.00252455	0.00178408	0.00106812	0.000632037	0.000374656	0.000593221	0.000668795	0.000530637	0.000971836	0.000555169
TAAACT	0.00167114	0.0032161	0.00385448	0.00308033	0.00360708	0.00614926	0.00219807	0.00380327	0.00281242	0.00444259	0.00290319	0.00569439	0.00200336	0.00586915	0.00401864	0.00389131	0.00317324	0.00620877	0.00194266	0.00378903	0.00305529	0.00613016	0.00285503	0.00494285	0.00255073	0.0034917	0.00259387	0.00340706	0.0030995	0.00615802	0.00190235	0.00236101	0.0024858	0.00738881	0.00214656	0.00473996	0.00383487	0.00367433	0.0019142	0.004992	0.00340788	0.00378574	0.00301739	0.00491685	0.00266192	0.00245303	0.00280031	0.00318878	0.0029843
TTAAAC	0.000722292	0.000664195	0.000242752	0.000525936	0.000746087	0.000509456	0.000320398	0.000997785	0.000509385	0.000778033	0.000190277	0.00042265	0.000500753	0.000924943	0.00150146	0.000343615	0.0023374	0.0011764	0.000641329	0.000793302	0.000432658	0.000258696	0.000268173	0.000156572	0.000504121	0.000695658	0.000157281	0.000945723	0.000135166	0.000258063	0.000402632	0.00151469	0.000137437	0.000194802	7.09965e-05	0.000168226	0.000297813	0.00109727	0.000391802	0.00150213	0.00122434	0.000855735	0.000206811	0.00012052	0.000414504	0.000602017	0.000398218	0.000795934	0
ATTAAA	0.000714942	0.000664195	0.000218287	0.000517176	0.000734921	0.000477413	0.000260741	0.000973398	0.000520331	0.000781474	0.000190277	0.000411403	0.000475591	0.000908503	0.00148326	0.000312004	0.00236597	0.00117184	0.000641329	0.000776034	0.000421505	0.000262364	0.000268173	0.000149534	0.000470835	0.000673824	0.000149715	0.000945723	0.000135166	0.000243831	0.00039355	0.0015496	0.000137437	0.000194802	6.41241e-05	0.000202223	0.000292973	0.00109284	0.000415326	0.00149546	0.00122434	0.000861381	0.000206811	9.82769e-05	0.000413778	0.000596984	0.000386337	0.000801832	0
CTATTA	0.000587406	0.000831015	0.000121439	0.000298631	0.000818447	0.000448045	0.000167651	0.0011052	0.00057597	0.000878182	0.000465415	0.000510791	0.000672872	0.00077713	0.00122112	0.000280885	0.002424	0.00105082	0.000786034	0.000596854	0.00031078	0.000179543	0.000287526	0.00015957	0.000570225	0.000791325	0.000232347	0.00183723	0.000450552	0.00022083	0.000357786	0.00240269	0.000122332	0.000287623	3.69108e-05	0.000168226	0.000506623	0.00116685	0.000439034	0.000534776	0.000860473	0.000756203	0.000160412	4.37352e-05	0.000391861	0.000824809	0.000386276	0.000985092	0
GTCTAT	0.000546554	0.000325158	9.72272e-05	0.000298631	0.00065954	0.000461464	0.000111926	0.000833832	0.000444423	0.000573726	0.000192125	0.000294234	0.000485475	0.000672598	0.00116682	0.000373761	0.00239513	0.000981249	0.000625452	0.000487383	0.000224878	0.000165798	0.000300266	0.000187623	0.000423688	0.000462229	0.000178066	0.000834952	9.65088e-05	0.000184858	0.000348891	0.00142781	0.000139557	0.000199905	4.57186e-05	0.000168226	0.00027673	0.00107197	0.000403442	0.000501627	0.000930683	0.000708219	0.000185456	6.91644e-05	0.000290039	0.000509685	0.000434705	0.000473909	0.000163353
AGTCTA	0.000552101	0.000330061	9.72272e-05	0.00037061	0.000656876	0.00048979	0.000111926	0.00087182	0.000431913	0.000590638	0.000148067	0.000339318	0.000475591	0.000684736	0.00123909	0.000312004	0.00242385	0.00102818	0.000641329	0.000486331	0.000210867	0.000168958	0.00025564	0.000125847	0.000239462	0.000466491	0.000142227	0.000829297	4.50552e-05	0.000173825	0.000366727	0.00143938	0.000122332	0.000199782	1.68565e-05	0.000201697	0.000205273	0.00108884	0.000439094	0.000521226	0.000827546	0.000705657	0.00014038	4.40257e-05	0.000293929	0.000517466	0.000175685	0.000347817	0
TAGTCT	0.000545018	0.000348793	9.72272e-05	0.000333538	0.000656876	0.00046563	0.000111926	0.00073499	0.000431913	0.000582645	0.000148067	0.000310857	0.000475591	0.000691202	0.00123909	0.000342963	0.00242385	0.00103265	0.000641329	0.000486331	0.000222197	0.000158028	0.000268106	0.000128972	0.000239462	0.000469682	0.000142227	0.000825021	4.50552e-05	0.000183011	0.000366727	0.00143349	0.000137835	0.000190258	1.68565e-05	0.000168226	0.000205273	0.00108438	0.000415326	0.000514587	0.00083603	0.000711334	0.00014038	7.5943e-05	0.000285004	0.00051315	0.000175685	0.000350845	0
CTAGTC	0.000530888	0.000325158	9.72272e-05	0.000333402	0.000656876	0.000383061	0.000111926	0.000715371	0.0003322	0.00045607	0.000148067	0.000310857	0.000475591	0.000589174	0.000497591	0.000218484	0.00051928	0.000641977	0.000561205	0.000469604	0.000210867	0.000129329	0.00024905	0.000115508	0.000239462	0.000430811	0.000127252	0.00069165	4.50552e-05	0.000169048	0.000366727	0.00143349	0.000137996	0.000171703	3.36779e-06	0.00013458	0.000205273	0.00107567	0.000415326	0.000468014	0.000827546	0.000705746	0.00014038	4.33531e-05	0.000262792	0.000462681	0.000175685	0.000336037	0
CCTAGT	0.000644366	0.000482704	0.000218287	0.000534923	0.00066236	0.000389045	0.000130564	0.000656885	0.000420966	0.000601717	0.000148067	0.00034983	0.000475591	0.000793331	0.000470533	0.000187203	0.00051928	0.00066	0.000561205	0.000724947	0.000288648	0.000197577	0.000255402	0.000156498	0.000421335	0.000543767	0.00013474	0.000791631	4.50552e-05	0.000187837	0.000366727	0.00110339	0.000106991	0.000181253	3.70457e-05	0.00013458	0.000190602	0.0010713	0.000415326	0.00143588	0.00084416	0.00077217	0.000147023	9.82769e-05	0.00030281	0.000386711	0.000175685	0.000350995	0
CACCTA	0.000731337	0.000556893	0.00167689	0.000760495	0.000739086	0.000396244	0.000920347	0.000777975	0.000521922	0.000586441	0.000148067	0.000338581	0.00118135	0.000807666	0.000480868	0.000187203	0.000583873	0.000665009	0.000776163	0.000762813	0.000301244	0.00019404	0.000262525	0.000164802	0.000449176	0.000622552	0.000176752	0.000806104	4.50552e-05	0.000183034	0.000696593	0.00109765	0.00119757	0.000171703	0.000319231	0.000209868	0.000200332	0.00112949	0.000561316	0.00144999	0.000853433	0.000815549	0.000162018	0.000171938	0.00043147	0.000429282	0.000175685	0.000342054	8.15518e-05
TCACCT	0.000644366	0.000497207	0.000218287	0.000534923	0.000657139	0.000383061	0.000151356	0.000662086	0.000398613	0.000593823	0.000169619	0.000338581	0.000612266	0.000810026	0.000499761	0.000187203	0.00051928	0.00067837	0.0005775	0.000716512	0.000288648	0.000212361	0.000255402	0.00017369	0.000404821	0.000544205	0.00013474	0.000795885	4.50552e-05	0.000183276	0.000357692	0.00109765	0.000106991	0.000219072	4.08468e-05	0.00013458	0.00024899	0.0010713	0.000766312	0.00146247	0.00084416	0.000822846	0.000234859	0.00013167	0.00031169	0.000382674	0.000152293	0.000347926	0
ATCACC	0.000651449	0.000492231	0.000218287	0.000534923	0.000668336	0.000389077	0.000149106	0.000652016	0.000409559	0.000593823	0.000148067	0.000344132	0.000475548	0.000823503	0.000498922	0.000218322	0.000548146	0.000669076	0.000561205	0.000716512	0.000288648	0.00019404	0.000344601	0.000149552	0.000404821	0.000544205	0.000187356	0.000808338	4.50552e-05	0.000192757	0.000386294	0.00112105	0.000106991	0.000171703	4.70802e-05	0.00013458	0.000221245	0.00107562	0.000415326	0.00145573	0.00084416	0.00076108	0.00036582	0.000122854	0.000387897	0.000395286	0.000163929	0.000354102	0.000114565
AATCAC	0.000736721	0.00102405	0.000267998	0.00117345	0.000807723	0.00226138	0.000187184	0.00116097	0.000664164	0.00147047	0.000553326	0.00201556	0.000509474	0.00359684	0.00127658	0.000344451	0.00245348	0.00272817	0.00065737	0.000933774	0.000455073	0.00523093	0.000288176	0.00316123	0.000735411	0.00177938	0.000254657	0.00211139	0.000496805	0.0018296	0.000375528	0.00207912	0.000122332	0.00551477	0.000188756	0.000202765	0.000582466	0.00126055	0.000415326	0.00269359	0.00124913	0.00101326	0.000840931	0.00299025	0.000807231	0.00066333	0.000410791	0.00107201	0
CAATCA	0.0006802	0.000985599	0.000364846	0.0012433	0.000679505	0.00225552	0.000373275	0.0017061	0.000553509	0.00142806	0.000278298	0.00208763	0.000624208	0.00364218	0.00160969	0.000409857	0.00245348	0.0028177	0.00121849	0.00101882	0.000377407	0.00526312	0.000288176	0.00318466	0.000487266	0.00200964	0.000149715	0.00136146	9.13087e-05	0.00182477	0.000384515	0.00166648	0.000153096	0.00543733	0.000330257	0.00124525	0.000571824	0.00129038	0.000415326	0.00267925	0.00124113	0.00122973	0.000866205	0.00320802	0.00106527	0.000966022	0.000152293	0.000918393	3.62332e-05
TAACGT	0.000822319	0.00110766	0.000389866	0.000535935	0.000904672	0.000520446	0.00029989	0.00123863	0.00077807	0.00112819	0.000557271	0.000618041	0.000724942	0.00104052	0.00155649	0.000373923	0.00248128	0.00133957	0.000819807	0.000860947	0.00051101	0.000273171	0.000362085	0.000240346	0.000822824	0.000993719	0.000362346	0.00200492	0.000551372	0.00027333	0.000430571	0.00250696	0.000167884	0.000306135	0.000119621	0.000168226	0.000631843	0.00121425	0.000510584	0.00154981	0.00132026	0.00101936	0.000351675	0.00019102	0.000561584	0.0010592	0.000435826	0.0011668	3.64219e-05
TTAACG	0.000743471	0.00109501	0.000266964	0.000630648	0.000955465	0.000495707	0.000334819	0.00120702	0.000686169	0.00109999	0.000423095	0.000604865	0.000680894	0.00104345	0.00155794	0.000312004	0.00242385	0.00130663	0.000817788	0.00087808	0.000502569	0.000254992	0.000340703	0.000215398	0.00078517	0.000957154	0.00028031	0.00200013	0.000450552	0.000267747	0.000420374	0.00250705	0.000122332	0.000292261	7.73903e-05	0.000168226	0.000548253	0.00120133	0.000464409	0.00153573	0.00126566	0.000950332	0.000220872	0.000109197	0.000534123	0.000920706	0.000433249	0.0011129	0
GTTAAC	0.000665308	0.000520614	0.000218287	0.000535156	0.000662445	0.000478094	0.000260741	0.000934855	0.000531685	0.000769561	0.000211383	0.000468851	0.000483789	0.00092284	0.00150156	0.000405759	0.00239498	0.00121672	0.000641329	0.000767469	0.000377407	0.000240587	0.000255402	0.000173874	0.000437117	0.000644157	0.000166918	0.000954053	4.50552e-05	0.000211254	0.000456401	0.00151487	0.000122332	0.000190258	5.38848e-05	0.000235516	0.000210138	0.00109313	0.000415326	0.0015023	0.00123203	0.000883091	0.000193386	0.00022107	0.000431693	0.000584429	0.000175685	0.000445232	0
AGTTAA	0.000672392	0.000530269	0.000340104	0.000553	0.000668693	0.000513907	0.000279283	0.000954741	0.000553928	0.000777188	0.000211493	0.000582664	0.000483705	0.000926811	0.00151085	0.000499513	0.00245287	0.00123472	0.000641329	0.000767469	0.00036637	0.000262158	0.00032587	0.000194749	0.000437117	0.000666208	0.000196986	0.000966592	4.50552e-05	0.000225562	0.000465342	0.00152074	0.000137673	0.000199559	5.38848e-05	0.000235516	0.000229625	0.00109313	0.000463047	0.0015023	0.00123203	0.000899828	0.000200064	0.000333111	0.000445284	0.000584429	0.000187566	0.000451146	3.64219e-05
TGTAGT	0.000695294	0.000760041	0.000363558	0.000632304	0.000797986	0.000671525	0.000506899	0.00146179	0.000949053	0.000956236	0.000169733	0.000805295	0.000631887	0.00122277	0.00173106	0.000407676	0.00248235	0.0015194	0.00128368	0.000956317	0.00056667	0.000648936	0.000464101	0.000457148	0.000503909	0.00105909	0.000303213	0.0011637	0.000228871	0.000479936	0.000555296	0.00165413	0.000741665	0.000878602	0.00043533	0.000407859	0.000680333	0.00122312	0.000415326	0.00156369	0.00140869	0.00114538	0.000534572	0.000628989	0.00068656	0.000874909	0.000342913	0.000895977	0.000631018
CTGTAG	0.000644582	0.000540136	0.000367272	0.000537107	0.000635673	0.000485683	0.000260741	0.00093828	0.000899819	0.000807441	0.000172313	0.000367771	0.000475591	0.000898804	0.00146704	0.000523361	0.00242385	0.00123147	0.000657797	0.000777468	0.000377407	0.000275347	0.000268338	0.000232674	0.000404863	0.00064636	0.000187589	0.000958417	9.13087e-05	0.000326115	0.000384655	0.00150913	0.000169008	0.000190258	9.89715e-05	0.000168226	0.000300304	0.00108074	0.000463047	0.0015025	0.00123366	0.000936158	0.000193386	0.000258569	0.000462479	0.000600505	0.000237446	0.000465138	0.000110816
TCTGTA	0.000651521	0.000844866	0.000367272	0.000537107	0.000668879	0.000497497	0.000316947	0.00110382	0.000593633	0.000922116	0.000172313	0.000462187	0.000656213	0.000987955	0.00153926	0.00055448	0.00242385	0.0012629	0.00078587	0.000853899	0.00043294	0.000293231	0.000281075	0.000273653	0.000404863	0.000837676	0.00023992	0.00110404	4.50552e-05	0.000311582	0.00039355	0.00156718	0.000137673	0.000282936	7.43788e-05	0.000235516	0.000308448	0.00111913	0.000498639	0.00152933	0.00123366	0.00093601	0.000233072	0.000280408	0.000520416	0.000819029	0.000199017	0.000612574	3.64219e-05
TGCTTC	0.00129185	0.00117447	0.00391027	0.000639308	0.00188314	0.00053645	0.00190498	0.00122875	0.00178575	0.00118496	0.00211893	0.000618508	0.00309848	0.00113252	0.00205006	0.000280723	0.00287438	0.00138653	0.000936341	0.000934633	0.000750307	0.000375111	0.00061625	0.000275693	0.00170191	0.00117304	0.000752766	0.00232435	0.000823894	0.000368121	0.00206084	0.00251361	0.00126387	0.000318748	0.000521224	0.000168226	0.000874209	0.00123482	0.000953155	0.0015362	0.00129912	0.00115081	0.00073107	0.000133849	0.000553683	0.00107562	0.00100417	0.00136814	0.000782947
AGCTTG	1.40211e-05	0	4.8299e-05	0	3.41506e-05	0	0	0	0	0	0	0	0	7.26546e-06	3.88018e-05	0	0	0	0	0	0	0	0	6.96452e-06	0	0	0	0	0	9.21362e-06	3.55799e-05	0	0	0	1.35768e-05	0	0.000135397	0	0	6.6383e-06	0	3.08671e-05	3.29751e-05	0	0	1.77444e-05	0	1.47787e-05	0
AAGCTT	6.25113e-05	4.75082e-06	0	1.82254e-05	4.23095e-05	0	0	0	1.0946e-05	0	9.41808e-05	5.4655e-06	4.91055e-05	3.99847e-05	3.0833e-05	0	0	0	0	1.65718e-05	2.19629e-05	2.14962e-05	7.16445e-06	0	8.13074e-06	1.30009e-05	0	2.0829e-05	0	9.26111e-06	9.97471e-06	0	0.000238686	0	1.72464e-05	0	1.57876e-05	1.29019e-05	5.31096e-05	0	0	1.808e-05	7.4107e-06	0	0	0.000147472	0	0	0
TCAAGC	7.01053e-06	0	4.8299e-05	0	0.000132657	3.18787e-05	7.77768e-05	0	6.91027e-05	0	0	1.152e-05	8.55286e-06	5.84247e-05	0.000142663	0	9.05082e-05	3.31311e-05	0	8.52195e-06	0.000208036	1.8404e-05	0.000133114	7.06628e-05	9.26526e-06	5.427e-05	0	2.18455e-05	0	4.37365e-05	8.28331e-05	0	1.60082e-05	0	3.4858e-05	0	0.000181764	0	0	6.96124e-06	8.62106e-06	6.42582e-05	2.63666e-05	2.27223e-05	0	1.77804e-05	0	3.00621e-05	0
ATCAAG	1.40572e-05	0	0	8.94506e-06	2.45341e-05	0	0	0	0	0	2.16666e-05	0	1.85062e-05	3.71771e-06	2.07943e-05	0	0	5.12752e-06	0	0	1.139e-05	0	7.16445e-06	0	1.86395e-05	0	0	9.56974e-06	0	0	8.89498e-06	0	0	0	3.1176e-05	0	0	0	0	0	0	1.25493e-05	6.78334e-06	0	0	4.68994e-06	0	6.37197e-06	0
GATCAA	1.40572e-05	0	0	1.79853e-05	1.88177e-05	0	0	0	0	0	0	0	1.85062e-05	1.04808e-05	0	0	0	0	0	0	0	0	7.16445e-06	0	1.86395e-05	0	0	4.12235e-06	0	0	0	1.1913e-05	0	2.8572e-05	3.35043e-06	0	0	1.31743e-05	0	0	0	0	5.45554e-05	0	0	0	0	6.65675e-06	0
AACGCG	1.40211e-05	9.40566e-06	4.79322e-05	0	0	1.23822e-05	0	4.8674e-06	0	1.16659e-05	2.16666e-05	1.65092e-05	0	3.38153e-06	9.00374e-06	0	0	4.46676e-06	0	0	2.24321e-05	3.55508e-06	1.281e-05	0	0	0	0	0	0	4.53736e-06	0	0	0	9.15868e-06	0	0	0	0	0	6.6383e-06	0	0	0	0	4.40567e-06	0	0	2.91873e-06	0
ACAACG	1.40211e-05	9.50164e-06	7.20219e-05	0	6.35912e-06	5.86087e-06	1.90324e-05	1.46529e-05	0	3.83378e-06	0	0	0.000233765	2.37857e-05	9.00374e-06	0	5.83498e-05	4.5608e-06	1.59586e-05	1.70892e-05	1.09812e-05	3.00213e-05	6.35199e-06	0	0	3.52517e-05	0	4.1436e-06	5.11509e-05	2.39918e-05	6.28767e-05	1.73168e-05	4.60244e-05	4.61472e-06	1.0086e-05	6.72902e-05	0	1.75458e-05	2.37064e-05	0	0	2.21232e-05	7.5861e-06	0	4.42838e-06	1.67728e-05	1.15761e-05	6.33976e-06	3.68053e-05
GACAAC	2.11042e-05	4.75082e-06	7.20219e-05	0	0	5.89124e-06	0	1.46025e-05	0	0	0	0	0	3.32842e-06	9.00374e-06	0	2.96331e-05	4.5608e-06	0	8.61119e-06	1.09812e-05	0	0	0	0	0	0	0	0	4.72741e-06	8.98763e-06	0	4.60244e-05	0	3.82343e-06	0	1.10794e-05	0	1.18838e-05	0	0	0	7.5861e-06	0	0	1.25689e-05	1.15761e-05	2.10222e-05	0
AGGACA	5.74625e-05	0.000399901	7.28839e-05	0.000387321	0.000110229	0.000147867	9.51779e-05	0.000382487	3.40006e-05	0.000240026	0.000217015	0.00119051	0.00021087	0.000197666	0.000271829	0.00073451	0	0.000167653	3.20826e-05	5.24921e-05	0.000690061	7.02004e-05	0.00187251	0.000592521	4.24743e-05	0.000170468	0.00263061	0.000189734	0	4.99188e-05	0.000146112	0.000364011	1.55847e-05	0.00014549	0.000148652	0.00014824	0.000263882	0.000114533	0.00262916	0.000529932	0.000173711	0.000262832	4.8585e-05	0.000550405	0.000352368	3.89182e-05	0.000119832	0.000155781	0.000146673
CAGGAC	0.000157217	4.41228e-05	0	9.00712e-05	0.00025673	1.80811e-05	0.000190339	3.4694e-05	6.74737e-05	0.000126418	0	2.2884e-05	9.98067e-05	2.75833e-05	7.40414e-05	0	0	4.6192e-05	4.94039e-05	8.79538e-06	9.05792e-05	0	8.52113e-05	5.19085e-05	4.21622e-05	0.00015193	7.33547e-06	3.82666e-05	0	0.000124579	0.000397923	0	1.56676e-05	5.23365e-05	0.000171949	3.39974e-05	0.000194867	4.89397e-05	1.21999e-05	6.50419e-06	6.7823e-05	7.97806e-05	0.000102221	2.25399e-05	8.85677e-06	1.32638e-05	1.18807e-05	0.000107629	0.000147836
TCAGGA	2.87654e-05	0	0	9.04073e-06	2.27772e-05	0	0	2.4416e-05	3.49417e-05	7.78883e-06	2.11053e-05	1.68854e-05	0	1.32294e-05	4.57329e-05	0	0	9.24328e-06	0	8.61119e-06	2.37335e-05	0	6.3849e-06	6.80212e-06	0	1.79317e-05	2.28352e-05	4.05989e-06	0	4.6543e-06	0	0	0	4.61472e-06	1.05071e-05	0	0	8.81256e-06	3.60267e-05	1.31769e-05	0	0	6.74764e-06	1.09765e-05	1.34023e-05	1.73602e-05	0	0	0
ACACGT	0.000689501	0.00220831	0.00109148	0.00209617	0.00177712	0.00506688	0.00103367	0.00252857	0.00165547	0.00262882	0.00173392	0.00444013	0.00116441	0.00388827	0.00187649	0.00313055	0.00047382	0.00421228	0.000821366	0.00259577	0.00222146	0.00515272	0.00185065	0.00429084	0.0009233	0.00228086	0.00178939	0.00150227	0.0025435	0.00487418	0.00100945	0.000715042	0.00203582	0.00603895	0.00123153	0.00300227	0.00306067	0.00239997	0.00131441	0.00206775	0.00167101	0.00199161	0.00196216	0.00428231	0.00181007	0.00124263	0.00213756	0.00194613	0.0022342
TGACAC	1.50996e-05	2.74002e-05	0.000162881	3.0011e-05	0.000152581	3.28734e-05	3.99227e-05	2.54642e-05	6.30758e-05	5.71905e-05	0.000302732	2.82225e-05	5.61756e-05	9.32491e-05	0.000148197	0	0	5.76886e-05	4.76312e-05	2.78285e-05	0.000716962	0.000101096	0.000239593	1.77312e-05	0.000226483	2.9295e-05	0.000203325	7.205e-05	9.56747e-05	6.28894e-05	0.000140888	5.77227e-06	0.000121799	6.48468e-05	0.000194998	3.34717e-05	0.000314835	4.95367e-06	0	2.82336e-05	2.83124e-05	1.10901e-05	0.000277232	1.2182e-05	1.86962e-05	8.51517e-05	0.000338913	0.000153004	0.000252021
GCTGAC	0.000396893	0.000124188	0.000825012	6.15468e-05	0.000491225	1.76437e-05	0.000280253	8.78686e-05	0.000743922	0.00022551	0.00023316	2.78128e-05	0.00030352	4.0717e-05	7.24507e-05	0	0.000347143	2.26669e-05	0.000546436	0.000164882	0.000501359	2.9138e-05	0.000289282	4.74196e-05	0.000297832	1.73946e-05	0.00131382	0.000292456	4.5527e-05	4.67842e-06	0.00060032	4.06763e-05	0.000749136	2.79798e-05	0.000172063	6.69434e-05	0.000165781	8.73921e-05	4.70737e-05	7.51554e-05	8.26371e-06	9.51595e-05	0.000253908	0	5.3579e-05	2.57101e-05	0.000210959	2.36694e-05	0.000253449
CCAAGG	0.000165458	0.000119822	0.000611476	6.49324e-05	8.05059e-05	0.000179426	0.000213148	0.000138831	0.000115904	6.40423e-05	0.000257309	6.25556e-05	0.000129543	0.000257955	6.47804e-05	6.68198e-05	0.000117343	4.36333e-05	0.000196625	0.000109865	5.88808e-05	4.46995e-05	0.000124371	3.41001e-05	0.000126869	8.68421e-05	0.000182782	8.24766e-05	9.05822e-05	5.11088e-05	0.000127431	5.81439e-05	0.000361962	5.93478e-05	5.98928e-05	0.000185494	0.000119783	0.000100406	6.16993e-05	0.00022646	4.28949e-05	7.74769e-05	0.000152421	5.77814e-05	6.52291e-05	5.92841e-05	0.000191253	5.14783e-05	0.000229016
ACCAAG	0.000406389	0.00018974	0.00063225	6.60019e-05	0.000359838	0.000174956	0.000253217	0.000115618	0.000387785	9.89648e-05	0.000741934	6.25192e-05	0.000391285	0.000110001	0.000187657	0.000101738	0.000117343	2.29049e-05	0.000316607	0.000128958	0.000408426	5.20708e-05	0.000812884	0.000119427	0.000914557	0.00015562	0.000563782	0.000243879	0.00105778	4.94504e-05	0.000462842	3.48742e-05	0.000274614	4.77753e-05	0.000633873	0.000106151	0.00080242	0.000138648	7.5034e-05	0.0001963	0.000273654	0.000126589	0.000277563	0.000142109	6.52587e-05	5.38706e-05	0.000785645	0.000512416	0.000759221
CAACCA	0.00019455	0.000119813	0.000101407	5.61728e-05	9.83631e-05	0.000163768	0.000231647	0.000115824	9.12491e-05	6.75907e-05	0.000342134	6.78111e-05	0.000206801	0.000111768	0.00016731	0.000128739	0.000267434	5.10314e-05	0.000144799	0.000117597	0.000278012	3.72426e-05	0.000191158	9.80442e-05	0.000135745	8.70759e-05	9.93638e-05	9.4781e-05	9.05822e-05	6.41073e-05	0.000137383	4.63891e-05	0.000239199	6.63821e-05	6.67262e-05	7.17941e-05	6.42516e-05	0.000104504	8.45049e-05	0.000189013	5.9725e-05	7.06406e-05	4.76799e-05	5.77814e-05	6.02051e-05	0.000212971	0.000187937	6.94008e-05	0.000113747
TCCCCG	0.000383718	0.000297841	0.000228229	0.000151568	0.000745596	0.00016083	0.000386814	0.000343573	0.000136202	9.43811e-05	0.000722656	0.000164851	0.000232296	0.000403227	0.00052828	0.000346178	0.000316807	0.000127773	0.000227234	0.000162108	0.000708264	0.000317146	0.000581339	0.000398293	0.000235579	0.000154441	0.000572822	0.00052169	0.000649533	0.000115473	0.000347836	0.000283246	0.000278979	0.000257574	0.000309493	3.77529e-05	0.000848845	0.000159132	0.000298577	0.000297759	0.000473197	0.000101109	0.00087375	0.000180971	9.48946e-05	0.000107605	0.00051826	0.000428994	0.000408801
CTCCCC	0.000297978	0.000204954	0.000203653	4.35806e-05	0.000210897	0.000118863	0.000333603	0.000219699	2.34847e-05	6.42028e-05	0.000419015	5.0508e-05	0.000106043	0.000373195	6.43463e-05	0.00037615	0.000316807	0.000118335	0.00022766	0.000162108	0.000102843	0.000295765	7.40289e-05	0.000227707	6.71454e-05	5.75589e-05	0.000191212	0.000266662	0.000185785	7.69939e-05	3.74136e-05	0.000329601	0.000186863	0.000263066	0.000178278	3.77529e-05	0.000270242	6.22543e-05	0.000285436	0.000221395	4.10226e-05	6.89844e-05	0.00026995	0.000182085	6.77842e-05	0.000216019	3.72157e-05	6.8552e-05	3.62332e-05
TTACCT	9.1976e-05	3.80591e-05	0.000121817	1.9659e-05	1.68217e-05	1.25082e-05	3.71798e-05	3.24001e-05	0.000106887	6.07424e-05	8.4641e-05	1.11298e-05	0	3.26014e-06	7.27844e-05	3.09588e-05	0	9.0502e-06	0	8.65651e-06	0.000111587	1.16215e-05	6.41487e-05	1.00603e-05	0.000164002	0	0.000209385	1.23909e-05	0	6.8192e-05	9.03469e-06	5.74267e-06	3.09259e-05	9.23164e-06	1.0156e-05	3.41763e-05	0.000116237	1.3151e-05	5.96667e-05	0	8.13723e-06	2.22958e-05	5.31092e-05	0.000132874	2.83136e-05	8.45166e-06	1.1696e-05	1.47607e-05	3.64219e-05
CCTTAC	0.000563946	0.000325928	0.000244703	0.000302003	0.000675125	9.00307e-05	0.00024717	0.000330916	0.000803099	0.00045853	0.00164331	0.000106801	0.000428585	0.000198495	0.000519417	0.000252592	0.000797161	0.000155605	0.000721594	0.000119871	0.000225949	4.09798e-05	0.000884143	7.9101e-05	0.000478421	9.19327e-05	0.000782562	0.00024264	0.000275868	0.000105269	0.000410029	0.000115538	0.00225433	0.000132577	0.00108784	0.000102171	0.000406071	0.000252847	0.000559138	0.000315916	0.000488106	0.000331949	0.000858047	0.000124152	0.00014267	0.000161836	0.000562646	0.000149786	0.00189791
CCCTTA	0.000427894	0.000220405	9.78859e-05	0.00015255	0.000442186	0.000120135	0.000210999	0.000184653	0.000399603	0.000220347	0.000931106	9.27096e-05	0.000235616	0.000101557	0.00037337	6.38937e-05	0.000562561	0.000105954	0.000462193	0.000183697	9.07681e-05	1.49897e-05	0.000413494	0.000145839	0.000203447	4.02745e-05	0.000376293	0.000307496	0.000185022	0.000768393	0.000165319	3.50339e-05	0.00112733	7.07901e-05	0.000603398	3.45399e-05	0.000235165	0.000139078	0.000341285	4.10647e-05	0.000212361	0.000203689	0.000816847	6.7366e-05	2.25432e-05	0.000220287	0.000300245	0.000147415	0.000931117
GAATTC	2.10685e-05	2.36579e-05	2.42119e-05	0	2.24782e-05	0	0	0	0	0	2.06768e-05	0	8.07285e-06	3.27695e-06	0	3.06429e-05	0	4.44385e-06	0	8.34892e-06	0	0	0	3.37456e-06	8.00817e-06	4.32618e-06	0	8.2447e-06	0	4.58342e-06	2.67329e-05	1.15449e-05	1.52617e-05	1.42939e-05	1.97803e-05	0	4.76633e-06	0	0	0	8.13723e-06	0	1.30822e-05	3.26663e-05	0	0	0	0	0
[truncated: 2,273 more rows]
[truncated: 71 more columns]
